# Supplementary material for: Base-promoted cascade 5-exo-dig annulation/carboxylation of o-(1-alkynyl)benzenesulfonamides with CO2: divergent synthesis of mono- or gem-dicarboxylic esters
Source: Royal Society of Chemistry journal article supplement (doi:10.1039/d4cc05239k), 2024-01-01

## Supporting Information

### **Base-promoted cascade 5-exo-dig annulation/carboxylation of o-(1-alkynyl)benzenesulfonamides with CO<sub>2</sub>: divergent synthesis of mono- or gem-dicarboxylic esters**

**Yang Yao,<sup>¶†</sup> Junxue Bai,<sup>¶†</sup> Peidong Cheng,<sup>†</sup> Han Yang,<sup>†</sup> Jianwei Sun,<sup>¶‡</sup> and Song Sun<sup>\*†</sup>**

<sup>†</sup> *Advanced Catalysis and Green Manufacturing Collaborative Innovation Center, School of Petrochemical Engineering, Changzhou University, Changzhou 213164, China*

<sup>‡</sup> *Department of Chemistry, the Hong Kong University of Science and Technology, Clear Water Bay, Kowloon, Hong Kong SAR, China*

Email: sunsong@cczu.edu.cn

#### **Contents**

|                                                                        |     |
|------------------------------------------------------------------------|-----|
| <b>I. General Information</b> .....                                    | S2  |
| <b>II. Evaluation of Conditions<sup>a</sup></b> .....                  | S3  |
| <b>III. Synthesis and Characterization of Starting Materials</b> ..... | S5  |
| <b>IV. Synthesis of Mono-Carboxylic Esters</b> .....                   | S18 |
| <b>V. Synthesis of Gem-Dicarboxylic Esters</b> .....                   | S35 |
| <b>VI. The Control Experiment and Proposed Mechanism</b> .....         | S47 |
| <b>VII. Gram-Scale Reaction and Derivation</b> .....                   | S53 |
| <b>IIIX. Synthesis of TACE Inhibitor</b> .....                         | S58 |
| <b>IX. Crystallographic Data of 2a and 4f</b> .....                    | S60 |

#### **NMR Spectra**

## **I. General Information**

Chemicals were used as received without special purification unless stated otherwise.  $^1\text{H}$  and  $^{13}\text{C}$  NMR were recorded at ambient temperature on a 400 or 300 MHz NMR spectrometer (100 or 75 MHz for  $^{13}\text{C}$  NMR). NMR experiments are reported in  $\delta$  units, parts per million (ppm), and were referenced to  $\text{CDCl}_3$  ( $\delta 7.26$  or  $77.0$  ppm) as the internal standard. NMR analysis was carried out at 298 K unless noted otherwise. HRMS was obtained on an ESI-LC-MS/MS spectrometer.

## II. Evaluation of Conditions<sup>a</sup>

Initially, *N*,4-dimethyl-2-(phenylethynyl)benzenesulfonamide **1a** was selected as the model substrate to optimize the reaction conditions (Table S1). Firstly, the reaction of **1a** with CO<sub>2</sub> was conducted by using 3 equiv of K<sub>2</sub>CO<sub>3</sub> as the base in DMF at 60 °C, the *5-exo-dig* annulation/carboxylation product **2a** was isolated in 36% yield, along with the generation of *6-endo-dig* analogous **2A** in 32% yield, amination-protonation product **2B** in 21% yield, respectively. The structure of **2a** was ambiguously confirmed by X-ray crystallography analysis (for details, please see Supporting Information, Figure S1). For further improving the reaction efficiency, then, other common bases were tested, Na<sub>2</sub>CO<sub>3</sub> gave **2a** in a decreased yield (25%, entry 2), while KO<sup>t</sup>Bu and Cs<sub>2</sub>CO<sub>3</sub> only could result in a messy mixture (entry 3) or almost no reaction (entry 4). Among the solvent screening, DMSO gave a slightly better result (45%, entry 5). However, DMAc only resulted in **2a** in 14% yield (entry 6), and the reaction could not occur in MeCN (entry 7). The attempt to improve the reaction efficiency by adding some Lewis acids failed. None of the desired acid **2a** could be detected. Instead, only the full formation of the protonated product **2B** was observed (entry 8). Further elevating the reaction temperature to 80 °C has no positive effect (38%, entry 9). However, lowering the temperature to 40 °C could improve the yield of **2a** to 50% (entry 10). Delightedly, the employment of dry DMSO improved the yield to 61% (entry 11). Particularly, when the reaction was conducted at room temperature for about 48 h, the yield of **2a** could be further increased to 76% (entries 12-13). Control experiments revealed that the reaction could not take place without base or CO<sub>2</sub>, respectively (entry 14).

**Table S1 Evaluation of Conditions<sup>a</sup>**

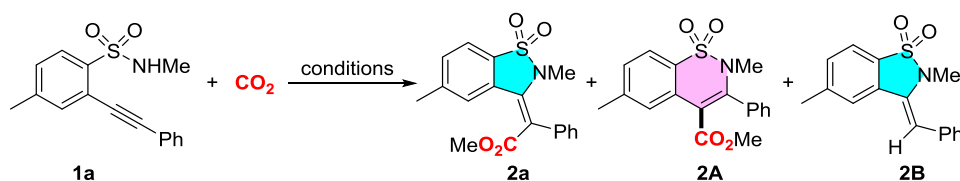

| entry           | base                            | solvent | T (°C) | 2a yield <sup>b</sup> (%) |
|-----------------|---------------------------------|---------|--------|---------------------------|
| 1               | K <sub>2</sub> CO <sub>3</sub>  | DMF     | 60     | 36                        |
| 2               | Na <sub>2</sub> CO <sub>3</sub> | DMF     | 60     | 25                        |
| 3               | KO <sup>t</sup> Bu              | DMF     | 60     | messy                     |
| 4               | Cs <sub>2</sub> CO <sub>3</sub> | DMF     | 60     | trace                     |
| 5               | K <sub>2</sub> CO <sub>3</sub>  | DMSO    | 60     | 45                        |
| 6               | K <sub>2</sub> CO <sub>3</sub>  | DMAc    | 60     | 14                        |
| 7               | K <sub>2</sub> CO <sub>3</sub>  | MeCN    | 60     | 0                         |
| 8 <sup>c</sup>  | K <sub>2</sub> CO <sub>3</sub>  | DMSO    | 60     | 0                         |
| 9               | K <sub>2</sub> CO <sub>3</sub>  | DMSO    | 80     | 38                        |
| 10              | K <sub>2</sub> CO <sub>3</sub>  | DMSO    | 40     | 50                        |
| 11 <sup>d</sup> | K <sub>2</sub> CO <sub>3</sub>  | DMSO    | 40     | 61                        |
| 12              | K <sub>2</sub> CO <sub>3</sub>  | DMSO    | 25     | 68                        |
| 13 <sup>e</sup> | K <sub>2</sub> CO <sub>3</sub>  | DMSO    | 25     | 76                        |
| 14 <sup>f</sup> | K <sub>2</sub> CO <sub>3</sub>  | DMSO    | 25     | N.R                       |

<sup>a</sup> Reaction conditions: **1a** (0.1 mmol), base (0.3 mmol), CO<sub>2</sub> (1 atm), solvent (1 mL), 12 h, in a sealed Schlenk tube, unless otherwise noted. Then, MeI (0.4 mmol), 50 °C (oil bath), 1 h. <sup>b</sup> Isolated yield. <sup>c</sup> Cu(OTf)<sub>2</sub> or AgOAc (10 mol%) was added, <sup>d</sup> dry DMSO was used. <sup>e</sup> 48 h. <sup>f</sup> without K<sub>2</sub>CO<sub>3</sub> or CO<sub>2</sub>. N.R. = no reaction.

### III. Synthesis and Characterization of Starting Materials

#### General Procedure A

(1) *o*-(1-Alkynyl)benzenesulfonamides are **1a-1x** prepared according to the known methods.<sup>1</sup> **1a-1x** are all known compounds (Note: commercially available *N*,4-dimethylbenzenesulfonamide was used for the synthesis of **1a-1d**, **1l-1x** directly, and 2-bromobenzenesulfonyl chloride was used for the synthesis of **1f** directly.)

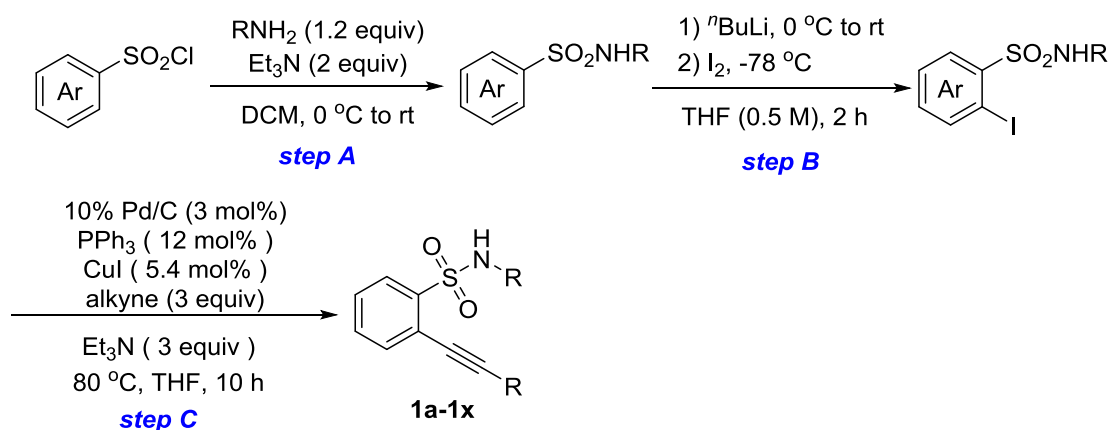

**Step A:** Primary amine (12 mmol, 1.2 equiv) and Et<sub>3</sub>N (20 mmol, 2 equiv) were added to round bottom flask, then benzenesulfonyl chloride (10 mmol, 1 equiv) in dichloromethane was injected into it at 0 °C. After the mixture was stirred until TLC showed that benzenesulfonyl chloride was totally consumed at room temperature. Water was added to the reaction mixture and extracted with dichloromethane (3 x 15 mL). The combined organic layers were dried over Na<sub>2</sub>SO<sub>4</sub>, concentrated under reduced pressure. The residue was purified by column chromatography (ethyl acetate: petroleum ether) on silica gel or recrystallized from ethyl acetate/petroleum ether to give the corresponding products.

**Step B:** To a solution of sulfonamide (1.0 equiv.) in anhydrous THF (0.5 M), *n*-butyllithium (2.5 M in hexanes, 2.1 equiv) was added dropwise at 0 °C. The

<sup>1</sup> (a) D. K. Barange, T. C. Nishad, N. K. Swamy, V. Bandameedi, D. Kumar, B. R. Sreekanth, K. Vyas, M. Pal, *J. Org. Chem.* 2007, **72**, 8547–8550. (b) B. M. Rao, J. S. Yadav, B. Sridharb, B. V. S. Reddy, *Org. Biomol. Chem.*, 2018, **16**, 5163–5166.

reaction mixture was stirred at 0 °C for 15 minutes and then warmed to room temperature. After stirring for one hour at room temperature the solution was cooled to –78 °C and stirred for further 15 minutes. Then, a solution of iodine (1.1 equiv.) in anhydrous THF (0.73 M) was added until the brown colour persisted. The reaction mixture was stirred for one hour at –78 °C and subsequently quenched by addition of NH<sub>4</sub>Cl (sat. aq. solution) followed by Na<sub>2</sub>S<sub>2</sub>O<sub>5</sub> (sat. aq. solution). The aqueous phase was extracted with EtOAc (3 x15 ml), the combined organic phases were dried over Na<sub>2</sub>SO<sub>4</sub> and concentrated in vacuo. Separation by flash column chromatography afforded sulfonamides **II-8** as colorless solids.

**Step C:** A mixture of 2-iodo-*N*-methyl benzenesulfonamide (10 mmol, 1.0 equiv), 10% Pd/C (3 mol%, 0.3 mmol, 31.9 mg), PPh<sub>3</sub> (12 mol%, 1.2 mmol, 314.7 mg), CuI (5.4 mol%, 0.54 mmol, 102.8 mg) and Et<sub>3</sub>N (3 equiv., 30 mmol, 4.2 mL) in acetonitrile (20 mL) was stirred at 25 °C for 30 min under nitrogen. To this mixture was added appropriate terminal alkyne (15 mmol) slowly with stirring. The reaction mixture was then stirred at 80 °C for 10 h, cooled to room temperature, diluted with EtOAc (50 mL) and filtered through celite. The filtrate was collected and concentrated under vacuum. The residue was purified by column chromatography (SiO<sub>2</sub>) to afford the desired product.

(2) *o*-(1-Alkynyl)benzenesulfonamides **3a-3u** are prepared according to the known methods. (*Note: commercially available 2-bromobenzenesulfonyl chloride was used for the synthesis of 3a-3e, 3s-3u directly. The corresponding 2-bromobenzenesulfonyl chlorides for the synthesis of 3o-3r were prepared according to the reported procedure.<sup>2</sup> Other iodine analogous was prepared according to step A and B.*)

#### General Procedure B

---

<sup>2</sup> N. Radhoff, A. Studer, *Angew. Chem. Int. Ed.*, 2021, **60**, 3561–3565.

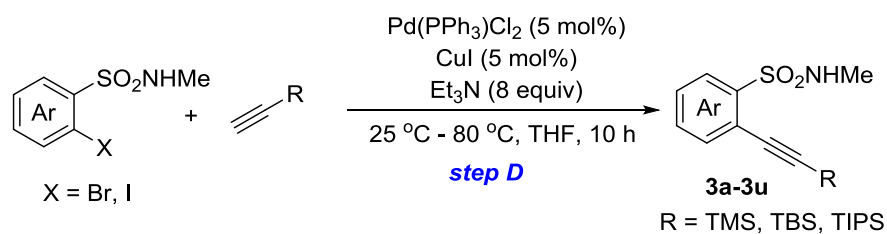

**Step D:**<sup>3</sup> A mixture of 2-iodo-*N*-methyl benzenesulfonamide<sup>4</sup> (10 mmol, 1.0 equiv), Pd(PPh<sub>3</sub>)<sub>2</sub>Cl<sub>2</sub> (5 mol%), CuI (5 mol%), terminal alkyne (15 mmol, 1.5 equiv) and triethylamine (80 mmol, 8 equiv) in tetrahydrofuran (20 mL) was stirred at 25 °C for 30 min under nitrogen. To this mixture was added appropriate terminal alkyne (15 mmol) slowly with stirring. The reaction mixture was then stirred at 80 °C for 10 h, cooled to room temperature, diluted with EtOAc (50 mL) and filtered through celite. The filtrate was collected and concentrated under vacuum. The residue was purified by column chromatography (SiO<sub>2</sub>) to afford the desired products (50 – 90%). **3a-3b**, **3d-3f** are known compounds.<sup>5</sup> **3c**, **3g-3t** are new compounds and their characterization data are listed as follows.

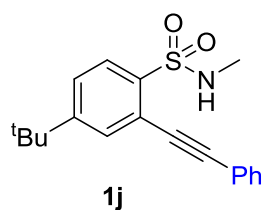

**4-(tert-Butyl)-*N*-methyl-2-(phenylethynyl)benzenesulfonamide (1j)** was prepared as a brown solid from 4-(tert-butyl)-2-iodo-*N*-methylbenzenesulfonamide (1.76 g, 5 mmol) and ethynylbenzene according to the General Procedure A (eluent: petroleum

<sup>3</sup> Y. Tao, S. R. Gilbertson, *Chem. Commun.*, 2018, **54**, 11292–11295.

<sup>4</sup> F. W. Friese, C. Mück-Lichtenfeld, A. Studer, *Nat. Commun.*, 2018, **9**, 2808.

<sup>5</sup> (a) Y. Ohta, H. Chiba, S. Oishi, N. Fujii, H. Ohno, *J. Org. Chem.*, 2009, **74**, 7052–7058.  
(b) D. K. Rayabarapu, A. Zhou, K. O. Jeon, T. Samarakoon, A. Rolfe, H. Siddiqui, P. R. Hanson, *Tetrahedron*, 2009, **65**, 3180–3188.

ether / ethyl acetate: 5:1) in 70% yield (1.14 g).

$^1\text{H}$  NMR (400 MHz,  $\text{CDCl}_3$ )  $\delta$  7.98 (d,  $J$  = 8.3 Hz, 1H), 7.71 (d,  $J$  = 2.0 Hz, 1H), 7.62 – 7.59 (m, 2H), 7.48 (dd,  $J$  = 8.4, 2.0 Hz, 1H), 7.41 – 7.38 (m, 3H), 5.05 (q,  $J$  = 5.5 Hz, 1H), 2.61 (d,  $J$  = 5.4 Hz, 3H), 1.36 (s, 9H).

$^{13}\text{C}$  NMR (101 MHz,  $\text{CDCl}_3$ )  $\delta$  156.0, 136.4, 131.7, 131.3, 129.7, 129.3, 128.6, 125.6, 121.9, 120.1, 96.6, 86.1, 35.0, 30.9, 29.5.

**HRMS** (ESI-TOF)  $m/z$   $[\text{M} + \text{H}]^+$ : calcd. for  $[\text{C}_{19}\text{H}_{22}\text{NO}_2\text{S}]^+$  328.1366, found 328.1356.

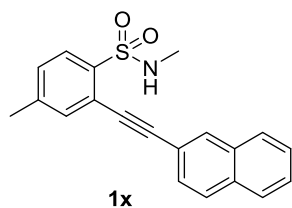

***N*,4-Dimethyl-2-(naphthalen-2-ylethynyl)benzenesulfonamide (1x)** was prepared as a yellow solid from 2-iodo-*N*,4-dimethylbenzenesulfonamide (0.93 g, 3 mmol) and 1-ethynylnaphthalene according to the General Procedure A (eluent: petroleum ether / ethyl acetate: 5:1) in 90% yield (0.90 g).

$^1\text{H}$  NMR (400 MHz,  $\text{CDCl}_3$ )  $\delta$  8.12 (brs, 1H), 7.97 (d,  $J$  = 8.1 Hz, 1H), 7.86 (dd,  $J$  = 7.2, 3.7 Hz, 3H), 7.61 (dd,  $J$  = 8.6, 1.6 Hz, 1H), 7.58 (d,  $J$  = 1.6 Hz, 1H), 7.56 – 7.53 (m, 2H), 7.29 (dt,  $J$  = 8.1, 1.2 Hz, 1H), 5.08 (q,  $J$  = 5.5 Hz, 1H), 2.62 (d,  $J$  = 5.5 Hz, 3H), 2.45 (s, 3H).

$^{13}\text{C}$  NMR (101 MHz,  $\text{CDCl}_3$ )  $\delta$  143.0, 136.3, 134.6, 133.1, 132.8, 132.0, 129.8, 129.1, 128.3, 127.9, 127.8 (2C), 127.2, 126.8, 120.4, 119.1, 97.3, 86.0, 29.5, 21.1.

**HRMS** (ESI-TOF)  $m/z$   $[\text{M} + \text{H}]^+$ : calcd. for  $[\text{C}_{20}\text{H}_{18}\text{NO}_2\text{S}]^+$  336.1053, found 336.1048.



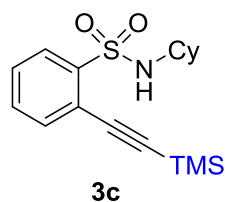

**N-Cyclohexyl-2-((trimethylsilyl)ethynyl)benzenesulfonamide (3c)** was prepared as a black oil from 2-bromo-*N*-cyclohexylbenzenesulfonamide (1.59 g, 5 mmol) and ethynyltrimethylsilane according to the General Procedure B (eluent: petroleum ether / ethyl acetate: 5:1) in 75% yield (1.25 g).

$^1\text{H}$  NMR (400 MHz,  $\text{CDCl}_3$ )  $\delta$  7.99 (dd,  $J = 7.8, 1.5$  Hz, 1H), 7.59 (dd,  $J = 7.4, 1.5$  Hz, 1H), 7.49 – 7.40 (m, 2H), 5.30 (d,  $J = 7.0$  Hz, 1H), 3.05 (s, 1H), 1.75 – 1.58 (m, 4H), 1.48 – 1.43 (m, 1H), 1.21 – 1.11 (m, 5H), 0.28 (s, 9H).

$^{13}\text{C}$  NMR (101 MHz,  $\text{CDCl}_3$ )  $\delta$  142.8, 134.4, 131.7, 128.7, 128.3, 119.9, 103.8, 101.8, 52.7, 33.5, 25.0, 24.3, -0.48.

**HRMS** (ESI-TOF)  $m/z$   $[\text{M} + \text{H}]^+$ : calcd. for  $[\text{C}_{17}\text{H}_{26}\text{NO}_2\text{SSi}]^+$  336.1448, found 336.1443.

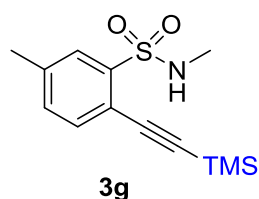

**N,5-Dimethyl-2-((trimethylsilyl)ethynyl)benzenesulfonamide (3g)** was prepared as a brown oil from 2-iodo-*N*,5-dimethylbenzenesulfonamide (1.56 g, 5 mmol) and ethynyltrimethylsilane according to the General Procedure B (eluent: petroleum ether / ethyl acetate: 5:1) in 70% yield (0.98 g).

$^1\text{H}$  NMR (400 MHz,  $\text{CDCl}_3$ )  $\delta$  7.81 (d,  $J = 8.1$  Hz, 1H), 7.39 (d,  $J = 1.8$  Hz, 1H), 7.22 – 7.19 (m, 1H), 5.15 (q,  $J = 5.5$  Hz, 1H), 2.52 (d,  $J = 5.5$  Hz, 3H), 2.32 (s, 3H), 0.23 (s, 9H).

$^{13}\text{C}$  NMR (101 MHz,  $\text{CDCl}_3$ )  $\delta$  142.8, 136.9, 134.8, 129.4, 129.3, 119.7, 102.8, 101.2, 29.2, 20.9, -0.7.

**HRMS** (ESI-TOF)  $m/z$   $[\text{M} + \text{H}]^+$ : calcd. for  $[\text{C}_{13}\text{H}_{20}\text{NO}_2\text{SSi}]^+$  282.0979, found

282.0975.

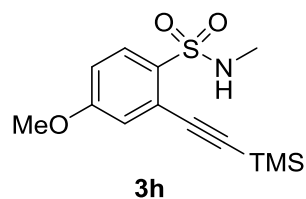

**4-Methoxy-N-methyl-2-((trimethylsilyl)ethynyl)benzenesulfonamide (3h)**

was prepared as a brown oil from 2-iodo-4-methoxy-N-methylbenzenesulfonamide (1.64 g, 5 mmol) and ethynyltrimethylsilane according to the General Procedure B (eluent: petroleum ether / ethyl acetate: 5:1) in 85% yield (1.26 g).

$^1\text{H}$  NMR (400 MHz,  $\text{CDCl}_3$ )  $\delta$  7.90 (d,  $J = 8.9$  Hz, 1H), 7.08 (d,  $J = 2.7$  Hz, 1H), 6.91 (dd,  $J = 8.8, 2.7$  Hz, 1H), 5.09 (q,  $J = 5.5$  Hz, 1H), 3.83 (s, 3H), 2.55 (d,  $J = 5.5$  Hz, 3H), 0.27 (s, 9H).

$^{13}\text{C}$  NMR (101 MHz,  $\text{CDCl}_3$ )  $\delta$  162.0, 131.6, 131.6, 121.6, 119.5, 114.1, 103.2, 101.0, 55.7, 29.4, -0.6.

**HRMS** (ESI-TOF)  $m/z$   $[\text{M} + \text{Na}]^+$ : calcd. for  $[\text{C}_{13}\text{H}_{19}\text{NNaO}_3\text{SSi}]^+$  320.0747, found 320.0742.

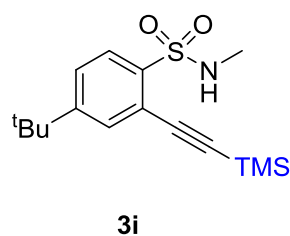

**4-(tert-Butyl)-N-methyl-2-((trimethylsilyl)ethynyl)benzenesulfonamide (3i)**

was prepared as a yellow solid from 4-(tert-butyl)-2-iodo-N-methylbenzenesulfonamide (1.77 g, 5 mmol) and ethynyltrimethylsilane according to the General Procedure B (eluent: petroleum ether / ethyl acetate: 5:1) in 85% yield (1.37 g).

$^1\text{H}$  NMR (400 MHz,  $\text{CDCl}_3$ )  $\delta$  7.92 (d,  $J = 8.4$  Hz, 1H), 7.62 (d,  $J = 2.0$  Hz, 1H),

7.46 (dd,  $J = 8.4, 2.0$  Hz, 1H), 5.20 (q,  $J = 5.5$  Hz, 1H), 2.59 (d,  $J = 5.4$  Hz, 3H), 1.32 (s, 9H), 0.29 (s, 9H).

$^{13}\text{C}$  NMR (101 MHz,  $\text{CDCl}_3$ )  $\delta$  155.9, 137.0, 131.6, 129.4, 126.0, 119.6, 102.6, 101.8, 35.0, 30.9, 29.4, -0.4.

**HRMS** (ESI-TOF)  $m/z$   $[\text{M} + \text{Na}]^+$ : calcd. for  $[\text{C}_{16}\text{H}_{25}\text{NNaO}_2\text{SSi}]^+$  346.1267, found 346.1263.

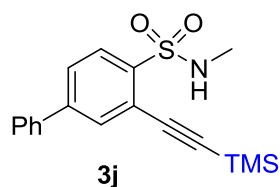

***N*-Methyl-3-((trimethylsilyl)ethynyl)-[1,1'-biphenyl]-4-sulfonamide (3j)** was prepared as a brown solid from 3-iodo-*N*-methyl-[1,1'-biphenyl]-4-sulfonamide (1.87 g, 5 mmol) and ethynyltrimethylsilane according to the General Procedure B (eluent: petroleum ether / ethyl acetate: 5:1) in 90% yield (1.54 g).

$^1\text{H}$  NMR (400 MHz,  $\text{CDCl}_3$ )  $\delta$  8.08 (d,  $J = 8.2$  Hz, 1H), 7.85 (d,  $J = 1.9$  Hz, 1H), 7.66 (dd,  $J = 8.2, 1.9$  Hz, 1H), 7.61 – 7.59 (m, 2H), 7.50 – 7.42 (m, 3H), 5.25 (q,  $J = 5.4$  Hz, 1H), 2.65 (d,  $J = 5.5$  Hz, 3H), 0.32 (s, 9H).

$^{13}\text{C}$  NMR (101 MHz,  $\text{CDCl}_3$ )  $\delta$  145.1, 138.4, 138.3, 133.0, 130.1, 129.0, 128.7, 127.2, 127.2, 120.5, 103.6, 101.3, 29.5, -0.5.

**HRMS** (ESI-TOF)  $m/z$   $[\text{M} + \text{H}]^+$ : calcd. for  $[\text{C}_{18}\text{H}_{22}\text{NO}_2\text{SSi}]^+$  344.1135, found 344.1136.

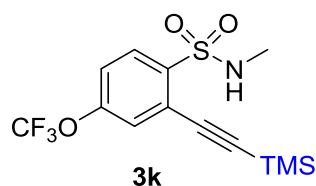

***N*-Methyl-4-(trifluoromethoxy)-2-((trimethylsilyl)ethynyl)benzenesulfonamide (3k)** was prepared as a red oil from

2-iodo-*N*-methyl-4-(trifluoromethoxy)benzenesulfonamide (1.91 g, 5 mmol) and ethynyltrimethylsilane according to the General Procedure B (eluent: petroleum ether / ethyl acetate: 5:1) in 65% yield (1.14 g).

$^1\text{H}$  NMR (400 MHz,  $\text{CDCl}_3$ )  $\delta$  8.06 (d,  $J = 8.8$  Hz, 1H), 7.45 (dt,  $J = 1.9, 1.0$  Hz, 1H), 7.29 (ddd,  $J = 8.7, 2.5, 1.1$  Hz, 1H), 5.16 (q,  $J = 5.4$  Hz, 1H), 2.63 (d,  $J = 5.4$  Hz, 3H), 0.30 (s, 9H).

$^{13}\text{C}$  NMR (101 MHz,  $\text{CDCl}_3$ )  $\delta$  151.4, 138.5, 131.6, 126.0, 122.5, 120.6, 120.1 (q,  $J_{\text{C-F}} = 260.8$  Hz), 105.77, 99.70, 29.43, -0.6.

**HRMS** (ESI-TOF)  $m/z$   $[\text{M} + \text{H}]^+$ : calcd. for  $[\text{C}_{13}\text{H}_{17}\text{F}_3\text{NO}_3\text{SSi}]^+$  352.0645, found 352.0638.

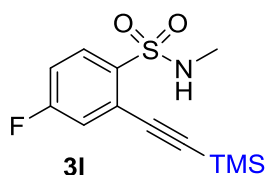

**4-Fluoro-*N*-methyl-2-((trimethylsilyl)ethynyl)benzenesulfonamide (31)** was prepared as a red oil from 4-fluoro-2-iodo-*N*-methylbenzenesulfonamide (1.58 g, 5 mmol) and ethynyltrimethylsilane according to the General Procedure B (eluent: petroleum ether / ethyl acetate: 5:1) in 60% yield (0.86 g).

$^1\text{H}$  NMR (400 MHz,  $\text{CDCl}_3$ )  $\delta$  8.03 (dd,  $J = 8.8, 5.5$  Hz, 1H), 7.32 (dd,  $J = 8.7, 2.6$  Hz, 1H), 7.18 – 7.13 (m, 1H), 5.13 (d,  $J = 5.4$  Hz, 1H), 2.61 (d,  $J = 5.4$  Hz, 3H), 0.30 (s, 9H).

$^{13}\text{C}$  NMR (101 MHz,  $\text{CDCl}_3$ )  $\delta$  164.2 (d,  $J_{\text{C-F}} = 256.3$  Hz), 136.4, 132.2 (d,  $J_{\text{C-F}} = 9.1$  Hz), 122.8 (d,  $J_{\text{C-F}} = 10.1$  Hz), 121.5 (d,  $J_{\text{C-F}} = 24.2$  Hz), 116.2, 116.0, 105.2 (d,  $J_{\text{C-F}} = 3.0$  Hz), 29.4, -0.6.

**HRMS** (ESI-TOF)  $m/z$   $[\text{M} + \text{H}]^+$ : calcd. for  $[\text{C}_{12}\text{H}_{17}\text{FNO}_2\text{SSi}]^+$  286.0728, found 286.0723.

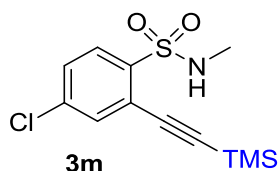

**4-Chloro-N-methyl-2-((trimethylsilyl)ethynyl)benzenesulfonamide (3m)**

was prepared as a yellow oil from 4-chloro-2-iodo-N-methylbenzenesulfonamide (1.65 g, 5 mmol) and ethynyltrimethylsilane according to the General Procedure B (eluent: petroleum ether / ethyl acetate: 5:1) in 70% yield (1.05 g).

$^1\text{H}$  NMR (400 MHz,  $\text{CDCl}_3$ )  $\delta$  7.94 (d,  $J = 8.5$  Hz, 1H), 7.60 (d,  $J = 2.1$  Hz, 1H), 7.42 (dd,  $J = 8.5, 2.1$  Hz, 1H), 5.14 (q,  $J = 5.4$  Hz, 1H), 2.60 (d,  $J = 5.4$  Hz, 3H), 0.29 (s, 9H).

$^{13}\text{C}$  NMR (101 MHz,  $\text{CDCl}_3$ )  $\delta$  138.5, 138.4, 134.1, 130.8, 128.9, 121.8, 105.3, 99.8, 29.4, -0.6.

**HRMS** (ESI-TOF)  $m/z$   $[\text{M} + \text{H}]^+$ : calcd. for  $[\text{C}_{12}\text{H}_{17}\text{ClINO}_2\text{SSi}]^+$  302.0432, found 302.0424.

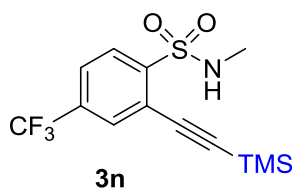

**N-Methyl-4-(trifluoromethyl)-2-((trimethylsilyl)ethynyl)benzenesulfonamide (3n)**

was prepared as a red solid from 2-iodo-N-methyl-4-(trifluoromethyl)benzenesulfonamide (1.83 g, 5 mmol) and ethynyltrimethylsilane according to the General Procedure B (eluent: petroleum ether / ethyl acetate: 5:1) in 68% yield (1.14 g).

$^1\text{H}$  NMR (400 MHz,  $\text{CDCl}_3$ )  $\delta$  8.15 – 8.13 (m, 1H), 7.87 (d,  $J = 1.8$  Hz, 1H), 7.70 (ddd,  $J = 8.2, 1.9, 0.8$  Hz, 1H), 5.22 (q,  $J = 5.3$  Hz, 1H), 2.63 (d,  $J = 5.4$  Hz, 3H), 0.30 (s, 9H).

$^{13}\text{C}$  NMR (101 MHz,  $\text{CDCl}_3$ )  $\delta$  143.4, 134.1 (q,  $J_{\text{C-F}} = 33.5$  Hz), 131.3 (q,  $J_{\text{C-F}} = 3.7$

Hz), 130.0, 125.3 (q,  $J_{C-F} = 3.6$  Hz), 122.7 (q,  $J_{C-F} = 274.1$  Hz), 121.2, 106.0, 99.8, 29.3, -0.7.

**HRMS** (ESI-TOF)  $m/z$   $[M + H]^+$ : calcd. for  $[C_{13}H_{17}F_3NO_2SSi]^+$  336.0696, found 336.0690.

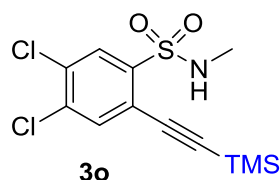

**4,5-Dichloro-N-methyl-2-((trimethylsilyl)ethynyl)benzenesulfonamide (3o)** was prepared as a yellow oil from 4,5-dichloro-2-iodo-N-methylbenzenesulfonamide (1.82 g, 5 mmol) and ethynyltrimethylsilane according to the General Procedure B (eluent: petroleum ether / ethyl acetate: 5:1) in 65% yield (1.09g).

$^1H$  NMR (400 MHz,  $CDCl_3$ )  $\delta$  8.05 (s, 1H), 7.68 (s, 1H), 5.14 (q,  $J = 5.3$  Hz, 1H), 2.62 (d,  $J = 5.4$  Hz, 3H), 0.27 (s, 9H).

$^{13}C$  NMR (101 MHz,  $CDCl_3$ )  $\delta$  139.6, 136.7, 135.6, 133.3, 131.1, 119.6, 106.0, 98.9, 29.4, -0.7.

**HRMS** (ESI-TOF)  $m/z$   $[M + H]^+$ : calcd. for  $[C_{12}H_{17}Cl_2NO_2SSi]^+$  336.0043, found 336.0041.

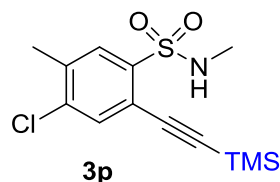

**4-chloro-N,5-dimethyl-2-((trimethylsilyl)ethynyl)benzenesulfonamide (3p)** was prepared as a white solid from 4-chloro-2-iodo-N,5-dimethylbenzenesulfonamide (1.73 g, 5 mmol) and ethynyltrimethylsilane according to the General Procedure B (eluent: petroleum ether / ethyl acetate: 5:1) in 63% yield (0.99g).

$^1\text{H}$  NMR (400 MHz,  $\text{CDCl}_3$ )  $\delta$  7.87 (d,  $J = 0.8$  Hz, 1H), 7.60 (s, 1H), 5.17 – 5.13 (q,  $J = 5.4$  Hz, 1H), 2.60 (d,  $J = 5.5$  Hz, 3H), 2.43 (s, 3H), 0.28 (s, 9H).

$^{13}\text{C}$  NMR (101 MHz,  $\text{CDCl}_3$ )  $\delta$  138.4, 138.1, 137.7, 134.5, 131.6, 118.8, 104.0, 100.0, 29.4, 20.1, -0.5.

**HRMS** (ESI-TOF)  $m/z$   $[\text{M} + \text{H}]^+$ : calcd. for  $[\text{C}_{13}\text{H}_{19}\text{ClNO}_2\text{SSi}]^+$  316.0589, found 316.0582.

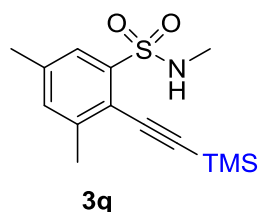

***N*,3,5-Trimethyl-2-((trimethylsilyl)ethynyl)benzenesulfonamide (3q)** was prepared as a white solid from 2-iodo-*N*,3,5-trimethylbenzenesulfonamide (1.63 g, 5 mmol) and ethynyltrimethylsilane according to the General Procedure B (eluent: petroleum ether / ethyl acetate: 5:1) in 60% yield (0.89g).

$^1\text{H}$  NMR (400 MHz,  $\text{CDCl}_3$ )  $\delta$  7.69 – 7.68 (m, 1H), 7.23 (d,  $J = 1.8$  Hz, 1H), 5.34 (q,  $J = 5.5$  Hz, 1H), 2.59 (d,  $J = 5.5$  Hz, 3H), 2.45 (s, 3H), 2.37 (s, 3H), 0.29 (s, 9H).

$^{13}\text{C}$  NMR (101 MHz,  $\text{CDCl}_3$ )  $\delta$  143.2, 139.8, 138.9, 134.2, 127.7, 116.4, 107.4, 100.3, 29.5, 21.4, 20.9, -0.3.

**HRMS** (ESI-TOF)  $m/z$   $[\text{M} + \text{H}]^+$ : calcd. for  $[\text{C}_{14}\text{H}_{22}\text{NO}_2\text{SSi}]^+$  296.1135, found 296.1125.

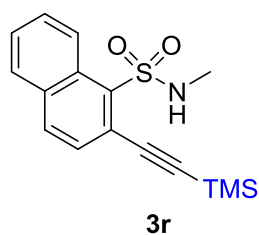

***N*-methyl-2-((trimethylsilyl)ethynyl)naphthalene-1-sulfonamide (3r)** was prepared as a yellow oil from 2-iodo-*N*-methylnaphthalene-1-sulfonamide (1.74 g, 5 mmol) and ethynyltrimethylsilane according to the General

Procedure B (eluent: petroleum ether / ethyl acetate: 5:1) in 50% yield (0.79g).

$^1\text{H}$  NMR (400 MHz,  $\text{CDCl}_3$ )  $\delta$  9.20 (d,  $J = 8.9$  Hz, 1H), 7.92 (d,  $J = 8.5$  Hz, 1H), 7.84 (d,  $J = 8.1$  Hz, 1H), 7.67 – 7.57 (m, 3H), 5.90 (q,  $J = 5.5$  Hz, 1H), 2.75 (d,  $J = 5.3$  Hz, 3H), 0.33 (s, 9H).

$^{13}\text{C}$  NMR (101 MHz,  $\text{CDCl}_3$ )  $\delta$  137.9, 133.8, 132.4, 130.3, 130.1, 128.6, 128.5, 127.5, 126.0, 119.8, 105.4, 103.6, 29.7, -0.5.

**HRMS** (ESI-TOF)  $m/z$   $[\text{M} + \text{H}]^+$ : calcd. for  $[\text{C}_{16}\text{H}_{20}\text{NO}_2\text{SSi}]^+$  318.0979, found 318.0971.

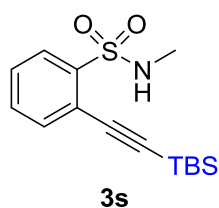

**2-((*tert*-Butyldimethylsilyl)ethynyl)-*N*-methylbenzenesulfonamide (3s)** was prepared as a brown oil from 2-bromo-*N*-methylbenzenesulfonamide (1.25 g, 5 mmol) and *tert*-butyl(ethynyl)dimethylsilane according to the General Procedure B (eluent: petroleum ether / ethyl acetate: 5:1) in 80% yield (1.24 g).

$^1\text{H}$  NMR (400 MHz,  $\text{CDCl}_3$ )  $\delta$  8.01 (dd,  $J = 7.7, 1.5$  Hz, 1H), 7.65 – 7.63 (m, 1H), 7.54 – 7.44 (m, 2H), 5.27 (q,  $J = 5.4$  Hz, 1H), 2.58 (d,  $J = 5.5$  Hz, 3H), 1.00 (s, 9H), 0.23 (s, 6H).

$^{13}\text{C}$  NMR (101 MHz,  $\text{CDCl}_3$ )  $\delta$  139.9, 134.7, 132.1, 129.4, 128.8, 120.2, 102.3, 101.9, 29.3, 26.0, 16.7, -4.9.

**HRMS** (ESI-TOF)  $m/z$   $[\text{M} + \text{H}]^+$ : calcd. for  $[\text{C}_{15}\text{H}_{24}\text{NO}_2\text{SSi}]^+$  310.1292, found 310.1288.

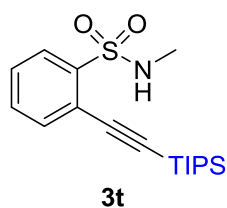



**N-Methyl-2-((triisopropylsilyl)ethynyl)benzenesulfonamide (3t)** was prepared as a white solid from 2-bromo-*N*-methylbenzenesulfonamide (1.25 g, 5 mmol) and ethynyltriisopropylsilane according to the General Procedure B (eluent: petroleum ether / ethyl acetate: 5:1) in 85% yield (1.49 g).

$^1\text{H}$  NMR (400 MHz,  $\text{CDCl}_3$ )  $\delta$  8.04 (dd,  $J = 7.6, 1.5$  Hz, 1H), 7.66 (dd,  $J = 7.4, 1.5$  Hz, 1H), 7.54 – 7.45 (m, 2H), 5.37 (d,  $J = 5.8$  Hz, 1H), 2.59 (d,  $J = 5.5$  Hz, 3H), 1.28 – 1.09 (m, 21H).

$^{13}\text{C}$  NMR (101 MHz,  $\text{CDCl}_3$ )  $\delta$  139.7, 135.1, 132.1, 129.4, 128.7, 120.4, 103.1, 100.8, 29.3, 18.6, 11.3.

**HRMS** (ESI-TOF)  $m/z$   $[\text{M} + \text{H}]^+$ : calcd. for  $[\text{C}_{18}\text{H}_{30}\text{NO}_2\text{SSi}]^+$  352.1761, found 352.1763.

## IV. Synthesis of Mono-Carboxylic Esters

### General Procedure C

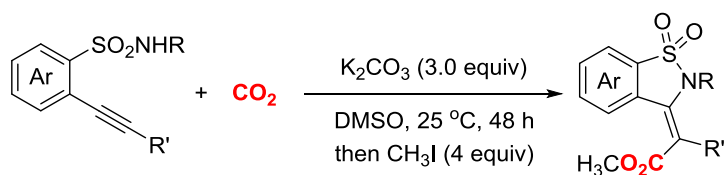

Under air, to an over-dried 20 mL Schlenk tube equipped with a Teflon cap was added *o*-(1-alkynyl)benzenesulfonamides (0.2 mmol), K<sub>2</sub>CO<sub>3</sub> (0.6 mmol, 3 equiv, 82.8 mg) and DMSO (2.0 mL). The reaction vessel was evacuated to about -0.1 MPa (last 30 seconds per time) and backfilled with CO<sub>2</sub> (1 atm) in three times. Then, the Schlenk tube was stirred at 25 °C for 48 h. After that, MeI (0.8 mmol, 4 equiv, 52 μL) was added into the reaction mixture, and the reaction mixture was stirred at 50 °C for about 1 h, then, the reaction mixture was terminated by saturated brine and extracted with ethyl acetate (EA) for at least 6 times (2 mL × 6). Subsequently, the combined organic layer was dried over anhydrous Na<sub>2</sub>SO<sub>4</sub> and concentrated under reduced pressure. The residue was purified by silica gel flash chromatography to give the desired product.

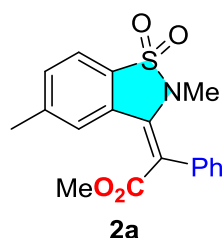

### Methyl

(*E*)-2-(2,5-dimethyl-1,1-dioxidobenzo[d]isothiazol-3(2*H*)-ylidene)-2-phenylacetate (**2a**) was prepared as a brown oil from *N*,4-dimethyl-2-(phenylethynyl)benzenesulfonamide (57.0 mg, 0.2 mmol) and CO<sub>2</sub> (1 atm) (eluent: dichloromethane / petroleum ether: 1:1) in 75% yield with the ratio of *Z/E* configuration in 1:5 (51.5 mg).

$^1\text{H}$  NMR (400 MHz,  $\text{CDCl}_3$ )  $\delta$  7.76 (d,  $J = 7.9$  Hz, 1H), 7.66 (d,  $J = 8.3$  Hz, 0.2H), 7.47 (s, 1H), 7.45 – 7.40 (m, 2H), 7.39 (s, 1H), 7.37 – 7.34 (m, 3H), 3.87 (s, 3H), 2.68 (s, 0.6H), 2.66 (s, 3H), 2.48 (s, 3H).

$^{13}\text{C}$  NMR (101 MHz,  $\text{CDCl}_3$ )  $\delta$  169.6, 144.1, 137.5, 134.8, 131.9, 130.3, 129.8, 128.7, 128.5, 127.8, 124.7, 121.2, 113.3, 53.0, 31.8, 22.2.

**HRMS** (ESI-TOF)  $m/z$   $[\text{M} + \text{Na}]^+$ : calcd. for  $[\text{C}_{18}\text{H}_{17}\text{NNaO}_4\text{S}]^+$  366.0770, found 366.0777.

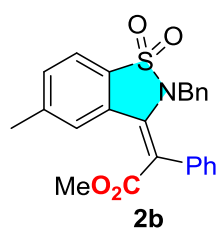

### Methyl

**(E)-2-(2-benzyl-5-methyl-1,1-dioxidobenzo[d]isothiazol-3(2H)-ylidene)-2-phenylacetate (2b)** was prepared as a brown oil from N-benzyl-4-methyl-2-(phenylethynyl)benzenesulfonamide (72.2 mg, 0.2 mmol) and  $\text{CO}_2$  (1 atm) (eluent: dichloromethane / petroleum ether: 1:1) in 53% yield with the ratio of *Z/E* configuration in 1:10 (44.4 mg).

$^1\text{H}$  NMR (400 MHz,  $\text{CDCl}_3$ )  $\delta$  7.81 (d,  $J = 7.9$  Hz, 1H), 7.75 (d,  $J = 7.9$  Hz, 0.1H), 7.44 (d,  $J = 8.0$  Hz, 1H), 7.40 (s, 1H), 7.35 – 7.28 (m, 3.7H), 7.24 – 7.20 (m, 0.3H), 7.20 – 7.09 (m, 5H), 6.93 – 6.90 (m, 0.2H), 6.75 – 6.74 (m, 2H), 5.18 (s, 0.2H), 4.43 (s, 2H), 3.78 (s, 3H), 3.54 (s, 0.3H), 2.46 (s, 3H), 2.02 (s, 0.3H).

$^{13}\text{C}$  NMR (101 MHz,  $\text{CDCl}_3$ )  $\delta$  169.0, 144.0, 143.5, 134.6, 134.1, 133.9, 131.7, 131.5, 131.2, 130.4, 129.8, 129.1, 128.7, 128.4, 127.9 (2C), 127.3, 127.0, 124.3, 121.2, 121.0, 116.4, 52.8, 52.1, 47.9, 46.7, 22.2, 21.7.

**HRMS** (ESI-TOF)  $m/z$   $[\text{M} + \text{Na}]^+$ : calcd. for  $[\text{C}_{24}\text{H}_{21}\text{NNaO}_4\text{S}]^+$  442.1083, found 442.1086.

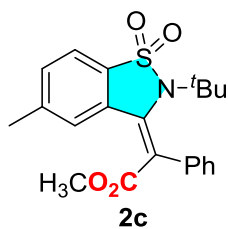

### Methyl

**(E)-2-(2-(tert-butyl)-5-methyl-1,1-dioxidobenzo[d]isothiazol-3(2H)-ylidene)-2-phenylacetate (2c)** was prepared as a brown oil from *N*-(tert-butyl)-4-methyl-2-(phenylethynyl)benzenesulfonamide (65.4 mg, 0.2 mmol) and CO<sub>2</sub> (1 atm) (eluent: dichloromethane / petroleum ether: 1:1) in 38% yield with the ratio of *Z/E* configuration in 1:19 (29.3 mg).

<sup>1</sup>H NMR (400 MHz, CDCl<sub>3</sub>) δ 7.80 (d, *J* = 7.9 Hz, 1H), 7.71 (s, 1H), 7.66 – 7.64 (m, 2H), 7.42 – 7.35 (m, 4H), 3.78 (s, 0.16H), 3.47 (s, 3H), 2.46 – 2.45 (m, 3.16H), 1.14 (s, 9H), 1.07 (s, 0.5 H).

<sup>13</sup>C NMR (101 MHz, CDCl<sub>3</sub>) δ 168.2, 143.1, 142.8, 139.0, 133.7, 130.1, 129.9, 129.6, 128.6, 128.1, 126.6, 124.4, 122.6, 65.5, 52.6, 30.8, 21.9.

**HRMS** (ESI-TOF) *m/z* [M + Na]<sup>+</sup>: calcd. for [C<sub>21</sub>H<sub>23</sub>NNaO<sub>4</sub>S]<sup>+</sup> 408.1240, found 408.1244.

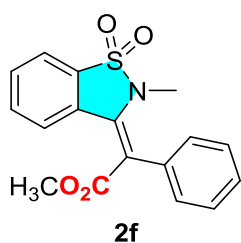

### Methyl

**(E)-2-(2-methyl-1,1-dioxidobenzo[d]isothiazol-3(2H)-ylidene)-2-phenylacetate (2f)** was prepared as a brown oil from *N*-methyl-2-(phenylethynyl)benzenesulfonamide (54.2 mg, 0.2 mmol) and CO<sub>2</sub> (1 atm) (eluent: dichloromethane / petroleum ether: 1:1) in 52% yield (34.2 mg).

$^1\text{H}$  NMR (400 MHz,  $\text{CDCl}_3$ )  $\delta$  7.90 – 7.86 (m, 1H), 7.75 – 7.71 (m, 1H), 7.67 – 7.61 (m, 2H), 7.43 – 7.34 (m, 5H), 3.87 (s, 3H), 2.67 (s, 3H).

$^{13}\text{C}$  NMR (101 MHz,  $\text{CDCl}_3$ )  $\delta$  169.3, 137.1, 134.6, 133.1, 132.3, 130.9, 129.9, 129.7, 128.6, 128.5, 124.3, 121.3, 113.8, 52.9, 31.7.

**HRMS** (ESI-TOF)  $m/z$   $[\text{M} + \text{H}]^+$ : calcd. for  $[\text{C}_{17}\text{H}_{16}\text{NO}_4\text{S}]^+$  330.0795, found 330.0787.

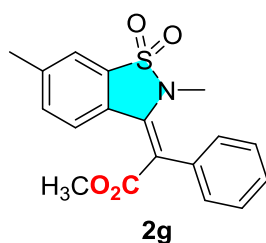

### Methyl

**(E)-2-(2,6-dimethyl-1,1-dioxidobenzo[d]isothiazol-3(2H)-ylidene)-2-phenylacetate (2g)** was prepared as a brown oil from *N*,5-dimethyl-2-(phenylethynyl)benzenesulfonamide (57.0 mg, 0.2 mmol) and  $\text{CO}_2$  (1 atm) (eluent: dichloromethane / petroleum ether: 1:1) in 66% yield with the ratio of *Z/E* configuration in 1:2.8 (45.3 mg).

$^1\text{H}$  NMR (400 MHz,  $\text{CDCl}_3$ )  $\delta$  7.80 – 7.78 (m, 0.35H), 7.66 (s, 1H), 7.62 – 7.58 (m, 1.7H), 7.48 – 7.34 (m, 8H), 3.85 (s, 3H), 3.53 (s, 1.06H), 2.91 (s, 1.06H), 2.66 (s, 3H), 2.49 (s, 3H), 2.39 (s, 1.06H).

$^{13}\text{C}$  NMR (101 MHz,  $\text{CDCl}_3$ )  $\delta$  169.6, 166.6, 146.2, 142.2, 137.7, 136.6, 134.9, 134.8, 134.3(2C), 132.5, 132.1, 130.3, 130.1, 129.8, 128.6, 128.4, 128.2, 127.9, 127.4, 124.3, 121.3, 119.7, 115.4, 112.8, 52.9, 52.1, 33.2, 31.8, 21.4, 20.3.

**HRMS** (ESI-TOF)  $m/z$   $[\text{M} + \text{Na}]^+$ : calcd. for  $[\text{C}_{18}\text{H}_{17}\text{NNaO}_4\text{S}]^+$  366.0770, found 366.0774.

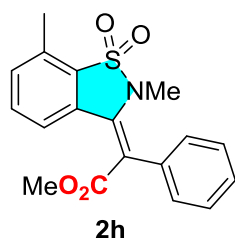

### Methyl

**(E)-2-(2,7-dimethyl-1,1-dioxidobenzo[d]isothiazol-3(2H)-ylidene)-2-phenylacetate (2h)** was prepared as colorless oil from *N*,2-dimethyl-6-(phenylethynyl)benzenesulfonamide (57.0 mg, 0.2 mmol) and CO<sub>2</sub> (1 atm) (eluent: dichloromethane / petroleum ether: 1:1) in 17% yield with the ratio of *Z/E* configuration in 1:3.3 (11.6 mg).

<sup>1</sup>H NMR (400 MHz, CDCl<sub>3</sub>) δ 7.76 (d, *J* = 8.0 Hz, 1H), 7.67 (brs, 0.3H), 7.60 (t, *J* = 7.6 Hz, 0.6H), 7.48 – 7.39 (m, 6H), 7.37 – 7.35 (m, 3H), 3.87 (s, 3H), 3.86 (s, 0.9H), 2.66 (s, 3.9H), 2.50 (s, 0.9H), 2.48 (s, 3H).

<sup>13</sup>C NMR (101 MHz, CDCl<sub>3</sub>) δ 169.6, 144.1, 142.3, 137.5, 134.9, 134.3, 132.0, 130.4, 129.9, 129.8, 128.7 (2C), 128.6, 127.9, 124.7, 124.4, 121.4, 121.2, 119.9, 113.3, 53.0, 31.8 (2C), 22.2, 21.4.

**HRMS** (ESI-TOF) *m/z* [M + H]<sup>+</sup>: calcd. for [C<sub>18</sub>H<sub>18</sub>NO<sub>4</sub>S]<sup>+</sup> 344.0951, found 344.0947.

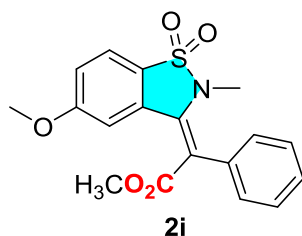

### Methyl

**(E)-2-(5-methoxy-2-methyl-1,1-dioxidobenzo[d]isothiazol-3(2H)-ylidene)-2-phenylacetate (2i)** was prepared as a brown oil from 4-methoxy-*N*-methyl-2-(phenylethynyl)benzenesulfonamide (60.2 mg, 0.2 mmol) and CO<sub>2</sub> (1 atm) (eluent: dichloromethane / petroleum ether: 1:1) in 71%

yield (51.0 mg).

$^1\text{H}$  NMR (400 MHz,  $\text{CDCl}_3$ )  $\delta$  7.77 (d,  $J = 8.6$  Hz, 1H), 7.40 – 7.35 (m, 5H), 7.19 (d,  $J = 2.1$  Hz, 1H), 7.13 (dd,  $J = 8.6, 2.2$  Hz, 1H), 3.87 (s, 3H), 3.86 (s, 3H), 2.65 (s, 3H).

$^{13}\text{C}$  NMR (101 MHz,  $\text{CDCl}_3$ )  $\delta$  169.5, 163.4, 137.2, 134.8, 132.2, 129.7, 128.7, 128.5, 124.7, 122.8, 117.6, 113.6, 108.9, 55.8, 53.0, 31.9.

**HRMS** (ESI-TOF)  $m/z$   $[\text{M} + \text{Na}]^+$ : calcd. for  $[\text{C}_{18}\text{H}_{17}\text{NNaO}_5\text{S}]^+$  382.0720, found 382.0724.

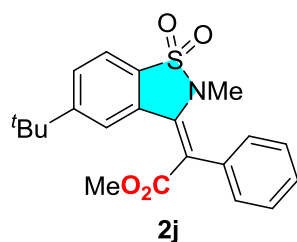

### Methyl

**(E)-2-(5-(*tert*-butyl)-2-methyl-1,1-dioxidobenzo[d]isothiazol-3(2H)-ylidene)-2-phenylacetate (2j)** was prepared as colorless oil from 4-(*tert*-butyl)-*N*-methyl-2-(phenylethynyl)benzenesulfonamide (65.4 mg, 0.2 mmol) and  $\text{CO}_2$  (1 atm) (eluent: dichloromethane / petroleum ether: 1:1) in 65% yield (50.1 mg).

$^1\text{H}$  NMR (400 MHz,  $\text{CDCl}_3$ )  $\delta$  7.81 – 7.78 (m, 2H), 7.67 (dd,  $J = 8.2, 1.6$  Hz, 1H), 7.43 – 7.36 (m, 5H), 3.89 (s, 3H), 2.66 (s, 3H), 1.36 (s, 9H).

$^{13}\text{C}$  NMR (101 MHz,  $\text{CDCl}_3$ )  $\delta$  169.7, 157.2, 137.4, 134.8, 130.1, 129.8, 129.7, 128.7 (2C), 128.5, 121.1, 121.0, 113.2, 53.0, 35.6, 31.9, 31.1.

**HRMS** (ESI-TOF)  $m/z$   $[\text{M} + \text{H}]^+$ : calcd. for  $[\text{C}_{21}\text{H}_{24}\text{NO}_4\text{S}]^+$  386.1421, found 386.1418.

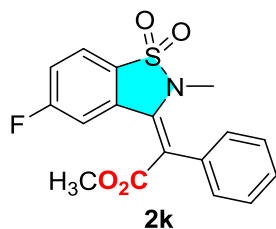

### Methyl

**(E)-2-(5-methoxy-2-methyl-1,1-dioxidobenzo[d]isothiazol-3(2H)-ylidene)-2-phenylacetate (2k)** was prepared as a brown oil from 4-fluoro-N-methyl-2-(phenylethynyl)benzenesulfonamide (57.8 mg, 0.2 mmol) and CO<sub>2</sub> (1 atm) (eluent: dichloromethane / petroleum ether: 1:1) in 72% yield (50.0 mg).

<sup>1</sup>H NMR (400 MHz, CDCl<sub>3</sub>) δ 7.87 (dd, *J* = 8.6, 5.0 Hz, 1H), 7.44 – 7.38 (m, 4H), 7.37 – 7.31 (m, 3H), 3.88 (s, 3H), 2.66 (s, 3H).

<sup>13</sup>C NMR (101 MHz, CDCl<sub>3</sub>) δ 169.0, 165.2 (*J*<sub>C-F</sub> = 254.7 Hz), 136.3 (*J*<sub>C-F</sub> = 3.1 Hz), 134.4, 132.9 (*J*<sub>C-F</sub> = 10.2 Hz), 129.7, 128.8, 128.7, 128.5 (*J*<sub>C-F</sub> = 2.8 Hz), 123.5 (*J*<sub>C-F</sub> = 10.1 Hz), 118.8 (q, *J*<sub>C-F</sub> = 24.6 Hz), 115.1, 111.8 (*J*<sub>C-F</sub> = 27.0 Hz), 53.2, 32.0.

**HRMS** (ESI-TOF) *m/z* [M + Na]<sup>+</sup>: calcd. for [C<sub>17</sub>H<sub>14</sub>FNNO<sub>4</sub>S]<sup>+</sup> 370.0520, found 370.0520.

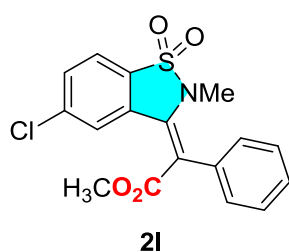

### Methyl

**(E)-2-(5-chloro-2-methyl-1,1-dioxidobenzo[d]isothiazol-3(2H)-ylidene)-2-phenylacetate (2l)** was prepared as a brown oil from 4-chloro-N-methyl-2-(phenylethynyl)benzenesulfonamide (61.0 mg, 0.2 mmol) and CO<sub>2</sub> (1 atm) (eluent: dichloromethane / petroleum ether: 1:1) in 77% yield (56.2 mg).



$^1\text{H}$  NMR (400 MHz,  $\text{CDCl}_3$ )  $\delta$  7.80 (d,  $J = 8.3$  Hz, 1H), 7.69 – 7.68 (m, 1H), 7.59 (dd,  $J = 8.3, 1.6$  Hz, 1H), 7.44 – 7.34 (m, 5H), 3.88 (s, 3H), 2.66 (s, 3H).

$^{13}\text{C}$  NMR (101 MHz,  $\text{CDCl}_3$ )  $\delta$  169.0, 139.8, 136.0, 134.3, 131.8, 131.1, 130.8, 129.7, 128.8, 128.7, 124.7, 122.5, 115.0, 53.2, 32.0.

**HRMS** (ESI-TOF)  $m/z$   $[\text{M} + \text{Na}]^+$ : calcd. for  $[\text{C}_{17}\text{H}_{14}\text{ClNNaO}_4\text{S}]^+$  386.0224, found 386.0232.

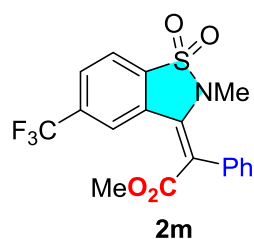

### Methyl

**(E)-2-(2-methyl-1,1-dioxido-5-(trifluoromethyl)benzo[d]isothiazol-3(2H)-ylidene)-2-phenylacetate (2m)** was prepared as a brown oil from N-methyl-2-(phenylethynyl)-4-(trifluoromethyl)benzenesulfonamide (67.8 mg, 0.2 mmol) and  $\text{CO}_2$  (1 atm) (eluent: dichloromethane / petroleum ether: 1:1) g in 85% yield with the ratio of Z/E configuration in 1:13.6 (67.5 mg).

$^1\text{H}$  NMR (400 MHz,  $\text{CDCl}_3$ )  $\delta$  8.56 (s, 0.1H), 8.07 – 8.05 (m, 0.1H), 8.02 – 8.00 (m, 1H), 7.98 (s, 1H), 7.89 – 7.86 (m, 1H), 7.82 – 7.79 (m, 0.1H), 7.56 – 7.46 (m, 0.46H), 7.46 – 7.36 (m, 5H), 3.88 (s, 3H), 3.40 (s, 0.24H), 3.05 (s, 0.24H), 2.69 (s, 3H).

$^{13}\text{C}$  NMR (101 MHz,  $\text{CDCl}_3$ )  $\delta$  168.9, 167.1, 135.7, 135.4 ( $J_{\text{C-F}} = 1.7$  Hz), 135.3, 135.0, 134.1, 131.0, 129.7, 129.0, 128.9, 128.8, 127.7 ( $J_{\text{C-F}} = 3.6$  Hz), 122.9 ( $J_{\text{C-F}} = 274.6$  Hz), 122.8, 122.3, 121.8 (q,  $J_{\text{C-F}} = 4.2$  Hz), 115.7, 53.1, 52.2, 35.1, 32.0.

**HRMS** (ESI-TOF)  $m/z$   $[\text{M} + \text{Na}]^+$ : calcd. for  $[\text{C}_{18}\text{H}_{14}\text{F}_3\text{NNaO}_4\text{S}]^+$  420.0488, found 420.0491.

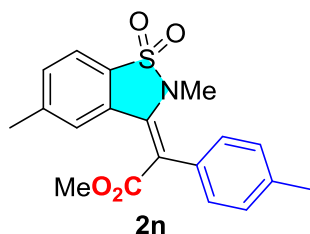

### Methyl

**(E)-2-(2,5-dimethyl-1,1-dioxidobenzo[d]isothiazol-3(2H)-ylidene)-2-(p-tolyl)acetate (2n)** was prepared as a brown oil from *N*,4-dimethyl-2-(*p*-tolylethynyl)benzenesulfonamide (59.8 mg, 0.2 mmol) and CO<sub>2</sub> (1 atm) (eluent: dichloromethane / petroleum ether: 1:1) in 72% yield (51.4 mg).

<sup>1</sup>H NMR (400 MHz, CDCl<sub>3</sub>) δ 7.77 (d, *J* = 8.0 Hz, 1H), 7.47 – 7.43(m, 2H), 7.28 – 7.22 (m, 4H, overlapped with CDCl<sub>3</sub>), 3.89 (s, 3H), 2.71 (s, 3H), 2.49 (s, 3H), 2.40 (s, 3H).

<sup>13</sup>C NMR (101 MHz, CDCl<sub>3</sub>) δ 169.7, 144.0, 138.6, 137.0, 131.8, 130.4, 129.8, 129.6 (2C), 129.4, 124.5, 121.1, 113.5, 52.9, 31.8, 22.1, 21.3.

**HRMS** (ESI-TOF) *m/z* [M + Na]<sup>+</sup>: calcd. for [C<sub>19</sub>H<sub>19</sub>NNaO<sub>4</sub>S]<sup>+</sup> 380.0927, found 380.0924.

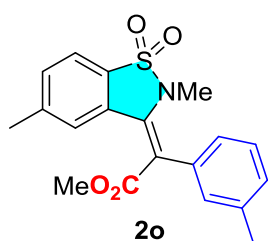

### Methyl

**(E)-2-(2,5-dimethyl-1,1-dioxidobenzo[d]isothiazol-3(2H)-ylidene)-2-(m-tolyl)acetate (2o)** was prepared as a brown oil from *N*,4-dimethyl-2-(*m*-tolylethynyl)benzenesulfonamide (59.8 mg, 0.2 mmol) and CO<sub>2</sub> (1 atm) (eluent: dichloromethane / petroleum ether: 1:1) in 69% yield (51.7 mg).

$^1\text{H}$  NMR (400 MHz,  $\text{CDCl}_3$ )  $\delta$  7.72 (d,  $J = 8.0$  Hz, 1H), 7.42 – 7.39 (m, 2H), 7.28 – 7.23 (m, 1H), 7.14 – 7.13 (m, 3H), 3.84 (s, 3H), 2.64 (s, 3H), 2.44 (s, 3H), 2.34 (s, 3H).

$^{13}\text{C}$  NMR (101 MHz,  $\text{CDCl}_3$ )  $\delta$  169.6, 144.0, 138.4, 136.9, 134.6, 131.8, 130.3, 130.2, 129.8, 129.3, 128.5, 126.9, 124.5, 121.1, 113.4, 52.9, 31.6, 22.1, 21.4.

**HRMS** (ESI-TOF)  $m/z$   $[\text{M} + \text{Na}]^+$ : calcd. for  $[\text{C}_{19}\text{H}_{19}\text{NNaO}_4\text{S}]^+$  380.0927, found 380.0935.

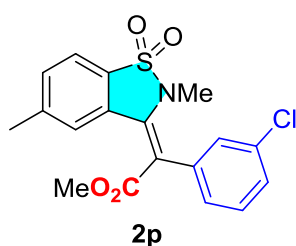

### Methyl

**(E)-2-(3-chlorophenyl)-2-(2,5-dimethyl-1,1-dioxidobenzo[d]isothiazol-3(2H)-ylidene)acetate (2p)** was prepared as a brown oil from 2-((3-chlorophenyl)ethynyl)-N,4-dimethylbenzenesulfonamide (63.8 mg, 0.2 mmol) and  $\text{CO}_2$  (1 atm) (eluent: dichloromethane / petroleum ether: 1:1) in 38% yield (28.7 mg).

$^1\text{H}$  NMR (400 MHz,  $\text{CDCl}_3$ )  $\delta$  7.71 (d,  $J = 7.9$  Hz, 1H), 7.47 – 7.44 (m, 1H), 7.41 – 7.37 (m, 1H), 7.34 – 7.30 (m, 2H), 7.24 – 7.21 (m, 1H), 3.79 (s, 3H), 3.24 (s, 3H), 2.11 (s, 3H).

$^{13}\text{C}$  NMR (101 MHz,  $\text{CDCl}_3$ )  $\delta$  167.2, 143.8, 139.4, 138.0, 135.2, 132.0, 130.8, 130.6, 130.3, 130.0, 129.1, 129.0, 127.0, 121.2, 109.8, 52.7, 30.6, 22.0.

**HRMS** (ESI-TOF)  $m/z$   $[\text{M} + \text{Na}]^+$ : calcd. for  $[\text{C}_{18}\text{H}_{16}\text{ClNNaO}_4\text{S}]^+$  400.0381, found 400.0386.

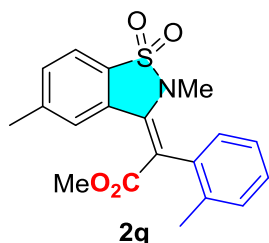

### Methyl

(*E*)-2-(2,5-dimethyl-1,1-dioxidobenzo[d]isothiazol-3(2*H*)-ylidene)-2-(*o*-tolyl)acetate (**2q**) was prepared as a brown oil from *N*,4-dimethyl-2-(*o*-tolylethynyl)benzenesulfonamide (59.8 mg, 0.2 mmol) and CO<sub>2</sub> (1 atm) (eluent: dichloromethane / petroleum ether: 1:1) in 67% yield (47.9 mg).

<sup>1</sup>H NMR (400 MHz, CDCl<sub>3</sub>) δ 7.75 (d, *J* = 8.0 Hz, 1H), 7.58 (s, 1H), 7.44 (d, *J* = 8.0 Hz, 1H), 7.28 – 7.21 (m, 4H), 3.82 (s, 3H), 2.50 (s, 3H), 2.48 (s, 3H), 2.29 (s, 3H).

<sup>13</sup>C NMR (101 MHz, CDCl<sub>3</sub>) δ 169.3, 144.0, 138.0, 137.7, 134.4, 131.9, 130.6, 130.3, 129.8, 129.7, 128.9, 126.0, 125.1, 121.1, 111.9, 52.8, 30.1, 22.2, 19.8.

HRMS (ESI-TOF) *m/z* [M + Na]<sup>+</sup>: calcd. for [C<sub>19</sub>H<sub>19</sub>NNaO<sub>4</sub>S]<sup>+</sup> 380.0927, found 380.0929.

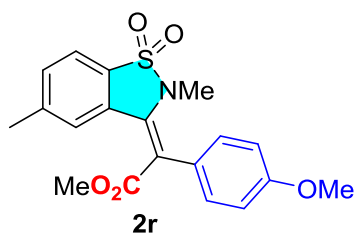

### Methyl

(*E*)-2-(2,5-dimethyl-1,1-dioxidobenzo[d]isothiazol-3(2*H*)-ylidene)-2-(4-methoxyphenyl)acetate (**2r**) was prepared as a brown oil from 2-((4-methoxyphenyl)ethynyl)-*N*,4-dimethylbenzenesulfonamide (63.02 mg, 0.2 mmol) and CO<sub>2</sub> (1 atm) (eluent: dichloromethane / petroleum ether: 1:1) in 53% yield (39.5 mg).

$^1\text{H}$  NMR (400 MHz,  $\text{CDCl}_3$ )  $\delta$  7.75 (d,  $J = 7.9$ , Hz, 1H), 7.44 – 7.41 (m, 2H), 7.30-7.27 (m, 2H), 6.94-6.92 (m, 2H), 3.87 (s, 3H), 3.84 (s, 3H), 2.70 (s, 3H), 2.47 (s, 3H).

$^{13}\text{C}$  NMR (101 MHz,  $\text{CDCl}_3$ )  $\delta$  169.8, 159.6, 144.0, 136.9, 131.7, 131.0, 130.5, 129.9, 126.8, 124.5, 121.1, 114.1, 113.4, 55.3, 52.9, 31.8, 22.2.

**HRMS** (ESI-TOF)  $m/z$   $[\text{M} + \text{Na}]^+$ : calcd. for  $[\text{C}_{19}\text{H}_{19}\text{NNaO}_5\text{S}]^+$  396.0876, found 396.0884.

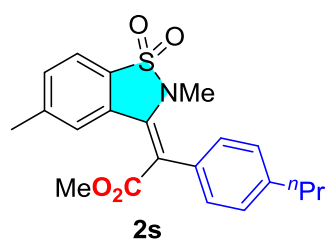

### Methyl

**(E)-2-(2,5-dimethyl-1,1-dioxidobenzo[*d*]isothiazol-3(2*H*)-ylidene)-2-(4-propylphenyl)acetate (2s)** was prepared as a brown oil from *N*,4-dimethyl-2-((4-propylphenyl)ethynyl)benzenesulfonamide (65.4 mg, 0.2 mmol) and  $\text{CO}_2$  (1 atm) (eluent: dichloromethane / petroleum ether: 1:1) in 66% yield with the ratio of *Z/E* configuration in 1:15 (50.8 mg).

$^1\text{H}$  NMR (400 MHz,  $\text{CDCl}_3$ )  $\delta$  7.75 (d,  $J = 7.9$  Hz, 1H), 7.68 (d,  $J = 7.9$  Hz, 0.07H), 7.45 – 7.41 (m, 2H), 7.28 – 7.26 (m, 2H), 7.22 – 7.20 (m, 2H), 3.87 (s, 3H), 3.79 (s, 0.2H), 3.25 (s, 0.2H), 2.68 (s, 3H), 2.65 – 2.59 (m, 2H), 2.47 (s, 3H), 1.69 – 1.64 (m, 2H), 0.96 (t,  $J = 7.3$  Hz, 3H).

$^{13}\text{C}$  NMR (101 MHz,  $\text{CDCl}_3$ )  $\delta$  169.7, 144.0, 143.3, 137.0, 131.9, 131.7, 131.4, 130.4 (2C), 129.8, 129.6, 129.5, 128.7, 127.1, 124.5, 121.1, 120.8, 113.6, 52.9, 37.7, 31.6, 24.2, 22.1, 13.8.

**HRMS** (ESI-TOF)  $m/z$   $[\text{M} + \text{Na}]^+$ : calcd. for  $[\text{C}_{21}\text{H}_{23}\text{NNaO}_4\text{S}]^+$  408.1240, found 408.1241.

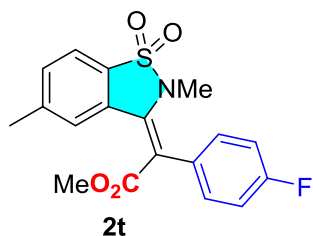

### Methyl

**(E)-2-(2,5-dimethyl-1,1-dioxidobenzo[d]isothiazol-3(2H)-ylidene)-2-(4-fluorophenyl)acetate (2t)** was prepared as a brown oil from A name could not be generated for this structure. (60.6 mg, 0.2 mmol) and CO<sub>2</sub> (1 atm) (eluent: dichloromethane / petroleum ether: 1:1) in 65% yield with the ratio of Z/E configuration in 1:10 (45.3 mg).

<sup>1</sup>H NMR (400 MHz, CDCl<sub>3</sub>) δ 7.76 (d, *J* = 7.6 Hz, 1H), 7.70 (d, *J* = 8.0 Hz, 0.1H), 7.46 – 7.43 (m, 2H), 7.36 – 7.29 (m, 2.2H), 7.18 – 7.13 (m, 0.2H), 7.13 – 7.08 (m, 2H), 3.86 (s, 3H), 3.78 (s, 0.3H), 3.23 (s, 0.3H), 2.67 (s, 3H), 2.47 (s, 3H), 2.11 (s, 0.3H).

<sup>13</sup>C NMR (101 MHz, CDCl<sub>3</sub>) δ 169.4, 162.5 (*J*<sub>C-F</sub>=250.6 Hz), 144.1, 138.0, 132.1, 131.6 (*J*<sub>C-F</sub>= 8.3 Hz), 130.8 (*J*<sub>C-F</sub>= 3.6 Hz), 130.2, 129.9, 124.7, 121.2, 115.9 (*J*<sub>C-F</sub>= 21.8 Hz), 112.2, 53.0, 31.9, 22.2.

**HRMS** (ESI-TOF) *m/z* [M + Na]<sup>+</sup>: calcd. for [C<sub>18</sub>H<sub>16</sub>FNNaO<sub>4</sub>S]<sup>+</sup> 384.0676, found 384.0681.

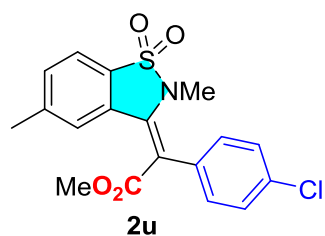

### Methyl

**(E)-2-(4-chlorophenyl)-2-(2,5-dimethyl-1,1-dioxidobenzo[d]isothiazol-3(2H)-ylidene)acetate (2u)** was prepared as a brown oil from 2-((4-chlorophenyl)ethynyl)-N,4-dimethylbenzenesulfonamide. (63.8 mg, 0.2

mmol) and CO<sub>2</sub> (1 atm) (eluent: dichloromethane / petroleum ether: 1:1) in 53% yield with the ratio of *Z/E* configuration in 1:6.6 (40.0 mg).

<sup>1</sup>H NMR (400 MHz, CDCl<sub>3</sub>) δ 7.76 (d, *J* = 7.9 Hz, 1H), 7.71 (d, *J* = 7.9 Hz, 0.15H), 7.47 – 7.43 (m, 2H), 7.40 – 7.37 (m, 2.15H), 7.31 – 7.27 (m, 2.45H), 7.00 (s, 0.15H), 6.00 (s, 0.15H), 3.87 (s, 3H), 3.18 (s, 0.45H), 2.69 (s, 3H), 2.48 (s, 3H), 2.23 (s, 0.45H).

<sup>13</sup>C NMR (101 MHz, CDCl<sub>3</sub>) δ 169.3, 144.2, 143.4, 138.4, 134.5, 133.9, 133.6, 133.4, 132.2, 131.2, 131.1, 130.9, 130.2, 130.0, 129.0 (2C), 124.9, 124.8, 121.2, 121.0, 111.9, 104.8, 53.0, 32.1, 29.7, 26.3, 22.2, 22.0.

**HRMS** (ESI-TOF) *m/z* [M + Na]<sup>+</sup>: calcd. for [C<sub>18</sub>H<sub>16</sub>ClNNaO<sub>4</sub>S]<sup>+</sup> 400.0381, found 400.0385.

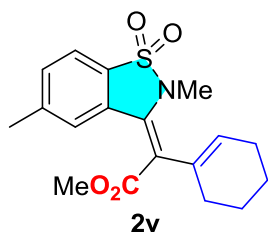

### Methyl

**(*E*)-2-(cyclohex-1-en-1-yl)-2-(2,5-dimethyl-1,1-dioxidobenzo[d]isothiazol-3(2H)-ylidene)acetate (2v)** was prepared as a brown oil from 2-(cyclohex-2-en-1-ylethynyl)-*N*,4-dimethylbenzenesulfonamide (57.8 mg, 0.2 mmol) and CO<sub>2</sub> (1 atm) (eluent: dichloromethane / petroleum ether: 1:1) in 74% yield with the ratio of *Z/E* configuration in 1:1 (51.4 mg).

<sup>1</sup>H NMR (400 MHz, CDCl<sub>3</sub>) δ 7.83 (s, 1H), 7.78 (d, *J* = 8.2 Hz, 1H), 7.73 (d, *J* = 8.0 Hz, 1H), 7.38 (s, 1H), 7.28 (d, *J* = 8.0 Hz, 1H), 7.16 (d, *J* = 8.0 Hz, 1H), 6.28 – 6.25 (m, 1H), 6.01 – 5.99 (m, 1H), 3.73(s, 3H), 3.16(s, 3H), 2.80 (s, 6H), 2.43 (s, 3H), 2.35 (s, 3H), 2.29 – 2.26 (m, 2H), 2.24 – 2.20 (m, 2H), 2.17 – 2.10 (m, 4H), 1.74 – 1.70 (m, 2H), 1.67 – 1.58 (m, 6H).

<sup>13</sup>C NMR (101 MHz, CDCl<sub>3</sub>) δ 167.9, 148.2, 142.7, 142.6, 136.5, 135.3, 134.5,

134.3, 133.1, 130.3, 130.1, 128.5, 128.2, 127.8, 125.6, 122.5, 121.6, 120.6, 113.2, 97.8, 84.6, 52.0, 37.7, 32.9, 28.6, 27.1, 25.7, 25.5, 22.3, 22.1, 21.9, 21.6, 21.3, 21.0.

**HRMS** (ESI-TOF)  $m/z$   $[M + Na]^+$ : calcd. for  $[C_{18}H_{21}NNaO_4S]^+$  370.1083, found 370.1086.

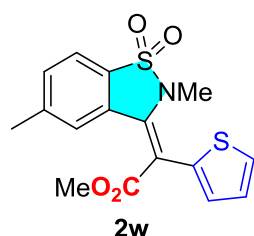

### Methyl

**(Z)-2-(2,5-dimethyl-1,1-dioxidobenzo[d]isothiazol-3(2H)-ylidene)-2-(thiophen-2-yl)acetate (2w)** was prepared as a brown oil from *N*,4-dimethyl-2-(thiophen-2-ylethynyl)benzenesulfonamide (58.0 mg, 0.2 mmol) and CO<sub>2</sub> (1 atm) (eluent: dichloromethane / petroleum ether: 1:1) in 48% yield with the ratio of *Z/E* configuration > 20:1 (33.5 mg).

<sup>1</sup>H NMR (400 MHz, CDCl<sub>3</sub>) δ 7.69 (d, *J* = 7.9 Hz, 1H), 7.51 – 7.50 (m, 1H), 7.33 (d, *J* = 7.9 Hz, 1H), 7.12 – 7.10 (m, 1H), 7.02 – 7.00 (m, 1H), 6.19 (s, 1H), 3.80 (s, 3H), 3.25 (s, 3H), 2.16 (s, 3H).

<sup>13</sup>C NMR (101 MHz, CDCl<sub>3</sub>) δ 166.8, 143.9, 141.0, 137.4, 131.9, 130.3, 129.8, 129.7, 128.5, 127.8, 127.2, 120.9, 102.4, 52.6, 30.6, 22.0.

**HRMS** (ESI-TOF)  $m/z$   $[M + Na]^+$ : calcd. for  $[C_{16}H_{15}NNaO_4S_2]^+$  372.0335, found 372.0335.

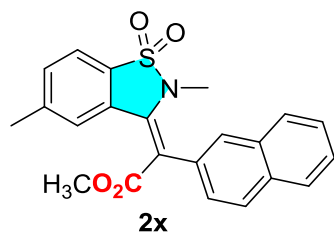

### Methyl



**(E)-2-(2,5-dimethyl-1,1-dioxidobenzo[d]isothiazol-3(2H)-ylidene)-2-(naphthalen-2-yl)acetate (2x)** was prepared as a yellow solid from N,4-dimethyl-2-(naphthalen-2-ylethynyl)benzenesulfonamide (67.0 mg, 0.2 mmol) and CO<sub>2</sub> (1 atm) (eluent: dichloromethane / petroleum ether: 1:1) in 64% yield with the ratio of Z/E configuration in 1:12 (50.0 mg).

<sup>1</sup>H NMR (400 MHz, CDCl<sub>3</sub>) δ 7.89 – 7.84 (m, 3.4H), 7.82 – 7.81 (m, 1H), 7.78 (d, J = 8.0 Hz, 1H), 7.71 (d, J = 8.0 Hz, 0.1H), 7.54 – 7.51 (m, 3.2H), 7.48 (dd, J = 8.4, 1.8 Hz, 1H), 7.46 – 7.44 (m, 1H), 7.10 (m, 0.1H), 3.90 (s, 3H), 3.24 (s, 0.25H), 2.67 (s, 3H), 2.50 (s, 3H).

<sup>13</sup>C NMR (101 MHz, CDCl<sub>3</sub>) δ 169.6, 144.1, 143.2, 137.8, 132.9, 132.8, 132.2, 132.0, 130.9, 130.3, 130.0, 129.9, 129.1, 128.4, 128.3 (2C), 128.2, 127.7 (2C), 127.5, 127.0, 126.9, 126.8, 126.5, 126.2, 125.0, 124.7, 121.2, 120.9, 113.2, 53.0, 32.0, 26.3, 22.2, 21.8.

**HRMS** (ESI-TOF) *m/z* [M + H]<sup>+</sup>: calcd. for [C<sub>22</sub>H<sub>20</sub>NO<sub>4</sub>S]<sup>+</sup> 394.1108, found 394.1107.

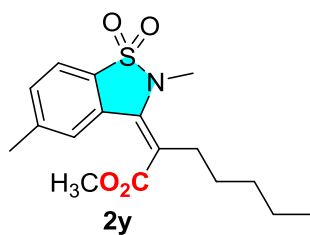

### Methyl

**(E)-2-(2,5-dimethyl-1,1-dioxidobenzo[d]isothiazol-3(2H)-ylidene)heptanoate (2y)** was prepared as a brown oil from 2-(hept-1-yn-1-yl)-N,4-dimethylbenzenesulfonamide (55.8 mg, 0.2 mmol) and CO<sub>2</sub> (1 atm) (eluent: dichloromethane / petroleum ether: 1:1) in 30% yield (20.2 mg).

<sup>1</sup>H NMR (400 MHz, CDCl<sub>3</sub>) δ 7.73 (d, J = 8.4 Hz, 1H), 7.28 – 7.27 (m, 2H), 3.90 (s, 3H), 3.28 (s, 3H), 2.60 – 2.56 (m, 2H), 2.42 (s, 3H), 1.71 – 1.65 (m, 2H), 1.40 – 1.33 (m, 4H), 0.91 – 0.90 (m, 3H).

$^{13}\text{C}$  NMR (101 MHz,  $\text{CDCl}_3$ )  $\delta$  167.8, 146.0, 142.6, 130.4, 128.6, 128.3, 125.7, 121.6, 115.2, 52.3, 31.6, 31.4, 31.3, 27.6, 22.2, 21.9, 13.9.

**HRMS** (ESI-TOF)  $m/z$   $[\text{M} + \text{Na}]^+$ : calcd. for  $[\text{C}_{17}\text{H}_{23}\text{NNaO}_4\text{S}]^+$  360.1240, found 360.1234.

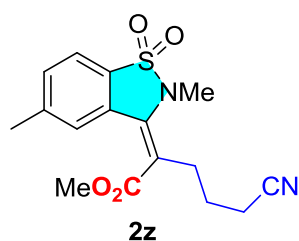

**(E)-Methyl**

**5-cyano-2-(2,5-dimethyl-1,1-dioxido-2H-benzo[d]isothiazol-3-ylidene)pentanoate (2z)** was prepared as a brown oil from 2-(5-cyanopent-1-yn-1-yl)-N,4-dimethylbenzenesulfonamide (55.2 mg, 0.2 mmol) and  $\text{CO}_2$  (1 atm) (eluent: dichloromethane / petroleum ether: 1:1) in 45% yield (30.2 mg).

$^1\text{H}$  NMR (400 MHz,  $\text{CDCl}_3$ )  $\delta$  7.74 (d,  $J = 8.0$  Hz, 1H), 7.34 (dd,  $J = 8.0, 1.4$  Hz, 1H), 7.29 (brs, 1H), 3.96 (s, 3H), 3.20 (s, 3H), 2.78 (t,  $J = 7.0$  Hz, 2H), 2.50 (t,  $J = 6.7$  Hz, 2H), 2.44 (s, 3H), 2.04 (t,  $J = 6.8$  Hz, 2H).

$^{13}\text{C}$  NMR (101 MHz,  $\text{CDCl}_3$ )  $\delta$  167.2, 143.0, 142.9, 129.8, 129.5, 128.8, 126.2, 122.0, 119.3, 119.1, 53.0, 32.6, 29.3, 23.5, 21.9, 15.8.

**HRMS** (ESI-TOF)  $m/z$   $[\text{M} + \text{Na}]^+$ : calcd. for  $[\text{C}_{16}\text{H}_{18}\text{N}_2\text{NaO}_4\text{S}]^+$  357.0879, found 357.0882.

## V. Synthesis of Gem-Dicarboxylic Esters

### General Procedure D

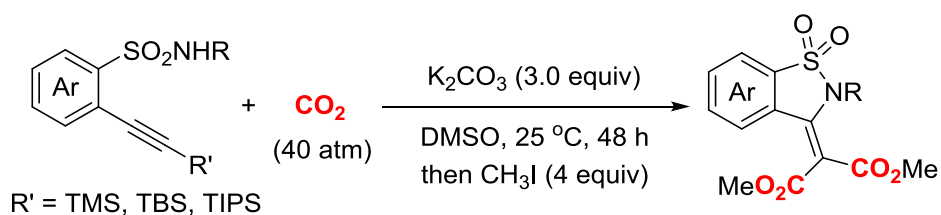

Under air, to an over-dried 20 mL vessel was added *o*-(1-alkynyl)benzene sulfonamide (0.2 mmol),  $\text{K}_2\text{CO}_3$  (0.6 mmol, 3 equiv, 82.8 mg) and DMSO (2.0 mL). The vessel was fixed into a stainless steel autoclave. Then the autoclave was sealed and  $\text{CO}_2$  was introduced from a cylinder. The reaction was carried out at 25 °C under magnetic stirring for 48 h and the pressure was kept constant (40 atm) during the reaction. As the reaction was completed, the vessel was cooled to room temperature and the pressure was released slowly to atmospheric pressure. After that, MeI (0.8 mmol, 4 equiv, 52  $\mu\text{L}$ ) was added into the reaction mixture, and the reaction mixture was stirred at room temperature for about 2 h. Then, the reaction mixture was saturated brine and extracted with ethyl acetate (EA) for at least 6 times (2 mL  $\times$  6). Subsequently, the combined organic layer was dried over anhydrous  $\text{Na}_2\text{SO}_4$  and concentrated under reduced pressure. The residue was purified by silica gel flash chromatography to give the desired product.

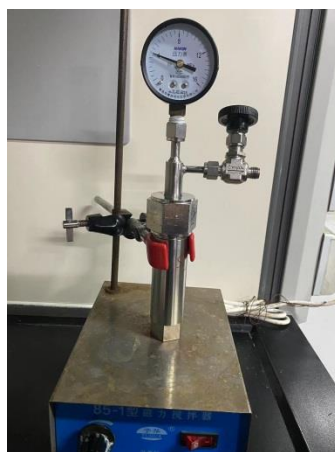

Figure S1 The setup for the synthesis of gem-dicarboxylic esters

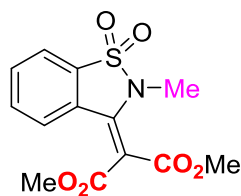

**4a**

### Dimethyl

**2-(2-methyl-1,1-dioxidobenzo[d]isothiazol-3(2H)-ylidene)malonate (4a)** was prepared as an oil from *N*-methyl-2-((trimethylsilyl)ethynyl)benzene sulfonamide **3a** (53.4 mg, 0.2 mmol) and CO<sub>2</sub> (4 MPa) according to the General Procedure **D** (eluent: ethyl acetate / petroleum ether: 1:5) in 65% yield (40.4 mg).

<sup>1</sup>H NMR (400 MHz, CDCl<sub>3</sub>) δ 7.91 – 7.88(m, 1H), 7.76 – 7.64 (m, 3H), 3.89 (s, 3H), 3.85 (s, 3H), 3.19 (s, 3H).

<sup>13</sup>C NMR (101 MHz, CDCl<sub>3</sub>) δ 166.7, 164.3, 145.3, 133.7, 132.6, 132.1, 128.2, 125.9, 121.7, 101.9, 53.2, 52.8, 30.7.

**HRMS** (ESI-TOF) *m/z* [M + Na]<sup>+</sup>: calcd. for [C<sub>13</sub>H<sub>13</sub>NNaO<sub>6</sub>S]<sup>+</sup> 334.0356, found 334.0352.

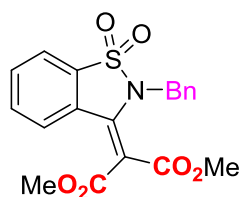

**4b**

### Dimethyl

**2-(2-benzyl-1,1-dioxidobenzo[d]isothiazol-3(2H)-ylidene)malonate (4b)** was prepared as an oil from *N*-benzyl-2-((trimethylsilyl)ethynyl)benzenesulfonamide **3b** (68.6 mg, 0.2 mmol) and CO<sub>2</sub> (4 MPa) according to the General Procedure **D** (eluent: ethyl acetate / petroleum ether: 1:5) in 55% yield (42.6 mg).

<sup>1</sup>H NMR (400 MHz, CDCl<sub>3</sub>) δ 7.98 – 7.96 (m, 1H), 7.77 – 7.73 (m, 1H), 7.70 –

7.66 (m, 1H), 7.62 – 7.60 (m, 1H), 7.30 – 7.26 (m, 3H), 7.19 – 7.16 (m, 2H), 5.13 (s, 2H), 3.78 (s, 3H), 3.52 (s, 3H).

$^{13}\text{C}$  NMR (101 MHz,  $\text{CDCl}_3$ )  $\delta$  166.5, 163.4, 140.7, 133.7, 132.5, 132.4, 131.8, 128.6, 128.4, 128.0, 127.6, 125.5, 121.8, 104.2, 53.2, 52.4, 46.8.

**HRMS** (ESI-TOF)  $m/z$   $[\text{M} + \text{H}]^+$ : calcd. for  $[\text{C}_{19}\text{H}_{18}\text{NO}_6\text{S}]^+$  388.0849, found 388.0852.

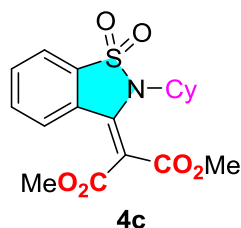

### Dimethyl

#### 2-(2-cyclohexyl-1,1-dioxidobenzo[d]isothiazol-3(2H)-ylidene)malonate (4c)

was prepared as an oil from N-cyclohexyl-2-((trimethylsilyl)ethynyl)benzenesulfonamide (67.0 mg, 0.2 mmol) and  $\text{CO}_2$  (4 MPa) according to the General Procedure D (eluent: ethyl acetate / petroleum ether: 1:5) in 40% yield (30.3 mg).

$^1\text{H}$  NMR (400 MHz,  $\text{CDCl}_3$ )  $\delta$  7.79 (d,  $J = 7.6$  Hz, 1H), 7.70 – 7.59 (m, 3H), 3.86 (s, 6H), 3.80 – 3.75 (m, 1H), 2.18 – 2.15 (m, 4H), 1.89 – 1.85 (m, 2H), 1.66 – 1.62 (m, 1H), 1.22 – 1.13 (m, 3H).

$^{13}\text{C}$  NMR (101 MHz,  $\text{CDCl}_3$ )  $\delta$  166.6, 165.1, 144.2, 133.6, 133.2, 132.4, 129.0, 125.5, 120.8, 104.2, 62.5, 53.0, 29.5, 26.6, 25.1.

**HRMS** (ESI-TOF)  $m/z$   $[\text{M} + \text{Na}]^+$ : calcd. for  $[\text{C}_{18}\text{H}_{21}\text{NNaO}_6\text{S}]^+$  402.0982, found 402.0981.

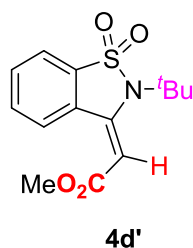

## Methyl

### (E)-2-(2-(tert-butyl)-1,1-dioxidobenzo[d]isothiazol-3(2H)-ylidene)acetate (4d')

was prepared as an oil from N-(tert-butyl)-2-((trimethylsilyl)ethynyl)benzenesulfonamide (61.8mg, 0.2 mmol) and CO<sub>2</sub> (4 MPa) according to the General Procedure D (eluent: ethyl acetate / petroleum ether: 1:5) in 80% yield (47.2 mg).

<sup>1</sup>H NMR (400 MHz, CDCl<sub>3</sub>) δ 9.03 – 9.01 (m, 1H), 7.78 – 7.74 (m, 1H), 7.68 – 7.61 (m, 2H), 5.82 (s, 1H), 3.79 (s, 3H), 1.83 (s, 9H).

<sup>13</sup>C NMR (101 MHz, CDCl<sub>3</sub>) δ 166.5, 143.4, 133.6, 133.1, 131.7, 128.5, 127.6, 120.1, 98.6, 59.7, 51.8, 28.6.

**HRMS** (ESI-TOF) *m/z* [M + H]<sup>+</sup>: calcd. for [C<sub>14</sub>H<sub>18</sub>NO<sub>4</sub>S]<sup>+</sup> 296.0951, found 296.0952.

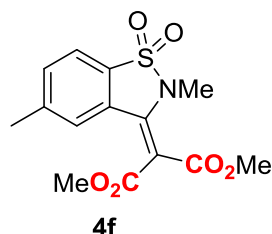

## Dimethyl

### 2-(2,5-dimethyl-1,1-dioxidobenzo[d]isothiazol-3(2H)-ylidene)malonate (4f)

was prepared as an oil from N,4-dimethyl-2-((trimethylsilyl)ethynyl)benzenesulfonamide (56.2 mg, 0.2 mmol) and CO<sub>2</sub> (4 MPa) according to the General Procedure D (eluent: ethyl acetate / petroleum ether: 1:5) in 64% yield (41.6 mg).

<sup>1</sup>H NMR (400 MHz, CDCl<sub>3</sub>) δ 7.77 (d, J = 7.9 Hz, 1H), 7.52 – 7.48 (m, 2H), 3.88 (s, 3H), 3.84 (s, 3H), 3.18 (s, 3H), 2.46 (s, 3H).

<sup>13</sup>C NMR (101 MHz, CDCl<sub>3</sub>) δ 166.9, 164.4, 145.6, 144.8, 133.5, 129.5, 128.5, 126.2, 121.4, 101.4, 53.1, 52.8, 30.8, 22.2.

**HRMS** (ESI-TOF) *m/z* [M + Na]<sup>+</sup>: calcd. for [C<sub>14</sub>H<sub>15</sub>NNaO<sub>6</sub>S]<sup>+</sup> 348.0512, found 348.0512.

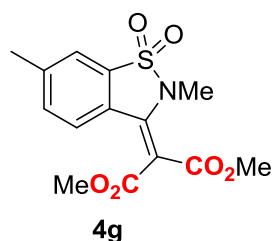

### Dimethyl

#### 2-(2,6-dimethyl-1,1-dioxidobenzo[d]isothiazol-3(2H)-ylidene)malonate (4g)

was prepared as an oil from N,5-dimethyl-2-((trimethylsilyl)ethynyl)benzenesulfonamide (56.2 mg, 0.2 mmol) and CO<sub>2</sub> (4 MPa) according to the General Procedure D (eluent: ethyl acetate / petroleum ether: 1:5) in 62% yield (40.3 mg).

<sup>1</sup>H NMR (400 MHz, CDCl<sub>3</sub>) δ 7.69 – 7.68 (m, 1H), 7.62 (d, *J* = 8.4 Hz, 1H), 7.47 – 7.44 (m, 1H), 3.88 (s, 3H), 3.85 (s, 3H), 3.18 (s, 3H), 2.51 (s, 3H).

<sup>13</sup>C NMR (101 MHz, CDCl<sub>3</sub>) δ 166.9, 164.5, 145.7, 144.2, 134.6, 132.3, 125.8, 125.6, 121.7, 101.2, 53.1, 52.7, 30.7, 21.5.

HRMS (ESI-TOF) *m/z* [M + H]<sup>+</sup>: calcd. for [C<sub>14</sub>H<sub>16</sub>NO<sub>6</sub>S]<sup>+</sup> 326.0693, found 326.0691.

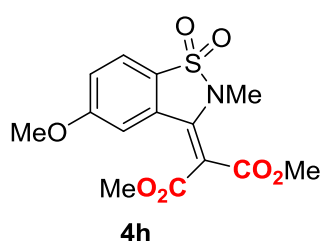

### Dimethyl

#### 2-(5-methoxy-2-methyl-1,1-dioxidobenzo[d]isothiazol-3(2H)-ylidene)malonate (4h)

was prepared as an oil from 4-methoxy-N-methyl-2-((trimethylsilyl)ethynyl)benzenesulfonamide (59.4 mg, 0.2 mmol) and CO<sub>2</sub> (4 MPa) according to the General Procedure D (eluent: ethyl acetate / petroleum ether: 1:5) in 65% yield (44.3 mg).

$^1\text{H}$  NMR (400 MHz,  $\text{CDCl}_3$ )  $\delta$  7.78 (d,  $J = 8.6$  Hz, 1H), 7.23 – 7.17 (m, 2H), 3.88 (s, 3H), 3.87 (s, 3H), 3.84 (s, 3H), 3.17 (s, 3H).

$^{13}\text{C}$  NMR (101 MHz,  $\text{CDCl}_3$ )  $\delta$  166.8, 164.4, 163.7, 145.4, 130.5, 124.2, 123.1, 118.8, 110.9, 101.7, 56.0, 53.2, 52.8, 30.9.

**HRMS** (ESI–TOF)  $m/z$   $[\text{M} + \text{H}]^+$ : calcd. for  $[\text{C}_{14}\text{H}_{16}\text{NO}_7\text{S}]^+$  342.0642, found 342.0641.

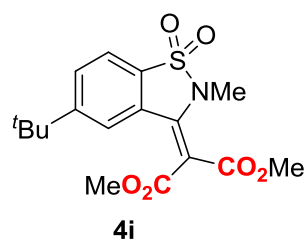

### Dimethyl

**2-(5-(tert-butyl)-2-methyl-1,1-dioxidobenzo[d]isothiazol-3(2H)-ylidene)malonate (4i)** was prepared as an oil from 4-(tert-butyl)-*N*-methyl-2-((trimethylsilyl)ethynyl)benzenesulfonamide (64.6 mg, 0.2 mmol) and  $\text{CO}_2$  (4 MPa) according to the General Procedure **D** (eluent: ethyl acetate / petroleum ether: 1:5) in 65% yield (47.7 mg).

$^1\text{H}$  NMR (400 MHz,  $\text{CDCl}_3$ )  $\delta$  7.82 – 7.79 (m, 2H), 7.74 (dd,  $J = 8.2, 1.6$  Hz, 1H), 3.90 (s, 3H), 3.84 (s, 3H), 3.18 (s, 3H), 1.33 (s, 9H).

$^{13}\text{C}$  NMR (101 MHz,  $\text{CDCl}_3$ )  $\delta$  167.0, 164.3, 157.8, 145.9, 130.3, 129.3, 128.2, 122.8, 121.2, 101.2, 53.1, 52.7, 35.7, 31.0, 30.8.

**HRMS** (ESI–TOF)  $m/z$   $[\text{M} + \text{Na}]^+$ : calcd. for  $[\text{C}_{17}\text{H}_{21}\text{NNaO}_6\text{S}]^+$  390.0982, found 390.0979.

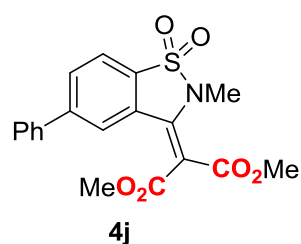



## Dimethyl

**2-(2-methyl-1,1-dioxido-5-phenylbenzo[d]isothiazol-3(2H)-ylidene)malonate** (**4j**) was prepared as an oil from *N*-methyl-3-((trimethylsilyl)ethynyl)-[1,1'-biphenyl]-4-sulfonamide (68.6 mg, 0.2 mmol) and CO<sub>2</sub> (4 MPa) according to the General Procedure **D** (eluent: ethyl acetate / petroleum ether: 1:5) in 67% yield (51.9 mg).

<sup>1</sup>H NMR (400 MHz, CDCl<sub>3</sub>) δ 7.95 – 7.87 (m, 3H), 7.55 – 7.45 (m, 5H), 3.88 (s, 3H), 3.86 (s, 3H), 3.22 (s, 3H).

<sup>13</sup>C NMR (101 MHz, CDCl<sub>3</sub>) δ 166.8, 164.3, 147.1, 145.2, 138.7, 131.5, 130.5, 129.3, 129.0, 128.9, 127.3, 124.7, 121.9, 101.9, 53.2, 52.8, 30.8.

**HRMS** (ESI-TOF) *m/z* [M + H]<sup>+</sup>: calcd. for [C<sub>19</sub>H<sub>18</sub>NO<sub>6</sub>S]<sup>+</sup> 388.0849, found 388.0848.

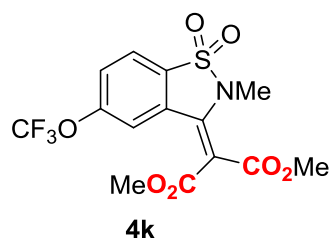

## Dimethyl

**2-(2-methyl-1,1-dioxido-5-(trifluoromethoxy)benzo[d]isothiazol-3(2H)-ylidene)malonate** (**4k**) was prepared as an oil from *N*-methyl-4-(trifluoromethoxy)-2-((trimethylsilyl)ethynyl)benzenesulfonamide (70.2 mg, 0.2 mmol) and CO<sub>2</sub> (4 MPa) according to the General Procedure **D** (eluent: ethyl acetate / petroleum ether: 1:5) in 60% yield (47.4 mg).

<sup>1</sup>H NMR (400 MHz, CDCl<sub>3</sub>) δ 7.94 (d, *J* = 8.5 Hz, 1H), 7.66 – 7.65 (m, 1H), 7.56 – 7.53 (m, 1H), 3.90 (s, 3H), 3.87 (s, 3H), 3.20 (s, 3H).

<sup>13</sup>C NMR (101 MHz, CDCl<sub>3</sub>) δ 166.2, 164.1, 152.8, 143.5, 130.8, 130.2, 124.9, 123.5, 120.1 (q, *J*<sub>C-F</sub> = 261.5 Hz), 118.3, 103.4, 53.3, 53.0, 30.9.

**HRMS** (ESI-TOF) *m/z* [M + H]<sup>+</sup>: calcd. for [C<sub>14</sub>H<sub>13</sub>F<sub>3</sub>NO<sub>7</sub>S]<sup>+</sup> 396.0359, found 396.0359.

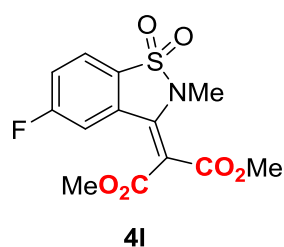

### Dimethyl

#### 2-(5-fluoro-2-methyl-1,1-dioxidobenzo[*d*]isothiazol-3(2*H*)-ylidene)malonate

(**4l**) was prepared as an oil from 4-fluoro-*N*-methyl-2-((trimethylsilyl)ethynyl)benzenesulfonamide (57.0 mg, 0.2 mmol) and CO<sub>2</sub> (4 MPa) according to the General Procedure D (eluent: ethyl acetate / petroleum ether: 1:5) in 65% yield (42.8 mg).

<sup>1</sup>H NMR (400 MHz, CDCl<sub>3</sub>) δ 7.89 (dd, *J* = 8.6, 4.9 Hz, 1H), 7.50 (dd, *J* = 9.6, 2.2 Hz, 1H), 7.44 – 7.39 (m, 1H), 3.90 (s, 3H), 3.85 (s, 3H), 3.18 (s, 3H).

<sup>13</sup>C NMR (101 MHz, CDCl<sub>3</sub>) δ 166.2, 165.4 (d, *J*<sub>C-F</sub> = 253.8 Hz), 164.1, 143.7 (d, *J*<sub>C-F</sub> = 2.8 Hz), 131.1 (d, *J*<sub>C-F</sub> = 11.0 Hz), 128.2 (d, *J*<sub>C-F</sub> = 3.0 Hz), 123.9 (d, *J*<sub>C-F</sub> = 10.0 Hz), 120.4 (d, *J*<sub>C-F</sub> = 24.0 Hz), 113.6 (d, *J*<sub>C-F</sub> = 27.0 Hz), 103.0, 53.3, 52.9, 30.7.

HRMS (ESI-TOF) *m/z* [M + Na]<sup>+</sup>: calcd. for [C<sub>13</sub>H<sub>12</sub>FNNaO<sub>6</sub>S]<sup>+</sup> 352.0262, found 352.0262.

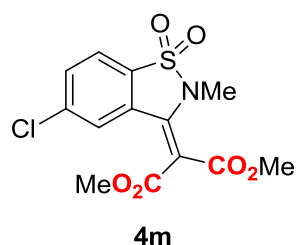

### Dimethyl

#### 2-(5-chloro-2-methyl-1,1-dioxidobenzo[*d*]isothiazol-3(2*H*)-ylidene)malonate

(**4m**) was prepared as an oil from 4-chloro-*N*-methyl-2-((trimethylsilyl)ethynyl)benzenesulfonamide (60.2 mg,

0.2 mmol) and CO<sub>2</sub> (4 MPa) according to the General Procedure D (eluent: ethyl acetate / petroleum ether: 1:5) in 60% yield (41.4 mg).

<sup>1</sup>H NMR (400 MHz, CDCl<sub>3</sub>) δ 7.82 (d, *J* = 8.3 Hz, 1H), 7.74 (d, *J* = 1.6 Hz, 1H), 7.67 (dd, *J* = 8.3, 1.7 Hz, 1H), 3.91 (s, 3H), 3.85 (s, 3H), 3.18 (s, 3H).

<sup>13</sup>C NMR (101 MHz, CDCl<sub>3</sub>) δ 166.2, 164.1, 143.7, 140.4, 132.8, 130.4, 123.0, 126.3, 122.7, 103.0, 53.3, 52.9, 30.7.

**HRMS** (ESI-TOF) *m/z* [M + Na]<sup>+</sup>: calcd. for [C<sub>13</sub>H<sub>12</sub>CINNaO<sub>6</sub>S]<sup>+</sup> 367.9966, found 367.9969.

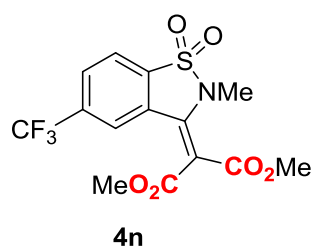

### Dimethyl

**2-(2-methyl-1,1-dioxido-5-(trifluoromethyl)benzo[d]isothiazol-3(2H)-ylidene)malonate (4n)** was prepared as a oil from

N-methyl-4-(trifluoromethyl)-2-((trimethylsilyl)ethynyl)benzenesulfonamide (67.0 mg, 0.2 mmol) and CO<sub>2</sub> (4 MPa) according to the General Procedure D (eluent: ethyl acetate / petroleum ether: 1:5) in 70% yield (53.1 mg).

<sup>1</sup>H NMR (400 MHz, CDCl<sub>3</sub>) δ 8.05 – 8.03 (m, 2H), 7.98 – 7.95 (m, 1H), 3.90 (s, 3H), 3.87 (s, 3H), 3.21 (s, 3H).

<sup>13</sup>C NMR (101 MHz, CDCl<sub>3</sub>) δ 166.1, 164.0, 143.4, 135.7 (d, *J*<sub>C-F</sub> = 33.4 Hz), 135.0, 129.5 (q, *J*<sub>C-F</sub> = 3.3 Hz), 129.2, 123.5 (q, *J*<sub>C-F</sub> = 4.0 Hz), 122.6 (q, *J*<sub>C-F</sub> = 274.6 Hz), 122.5, 103.6, 53.3, 53.1, 30.8.

**HRMS** (ESI-TOF) *m/z* [M + Na]<sup>+</sup>: calcd. for [C<sub>14</sub>H<sub>12</sub>F<sub>3</sub>NNaO<sub>6</sub>S]<sup>+</sup> 402.0230, found 402.0233.

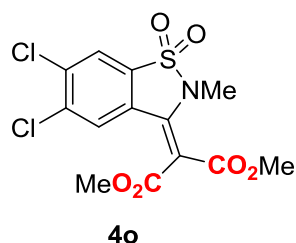

### Dimethyl

**2-(5,6-dichloro-2-methyl-1,1-dioxidobenzo[d]isothiazol-3(2H)-ylidene)malonate (4o)** was prepared as an oil from 4,5-dichloro-N-methyl-2-((trimethylsilyl)ethynyl)benzenesulfonamide (67.0 mg, 0.2 mmol) and CO<sub>2</sub> (4 MPa) according to the General Procedure **D** (eluent: ethyl acetate / petroleum ether: 1:5) in 50% yield (37.9 mg).

<sup>1</sup>H NMR (400 MHz, CDCl<sub>3</sub>) δ 7.96 (s, 1H), 7.92 (s, 1H), 3.91 (s, 3H), 3.86 (s, 3H), 3.18 (s, 3H).

<sup>13</sup>C NMR (101 MHz, CDCl<sub>3</sub>) δ 166.0, 164.1, 143.1, 138.9, 137.7, 131.4, 128.1, 127.6, 123.2, 103.4, 53.4, 53.0, 30.8.

**HRMS** (ESI-TOF) *m/z* [M + H]<sup>+</sup>: calcd. for [C<sub>13</sub>H<sub>12</sub>Cl<sub>2</sub>NO<sub>6</sub>S]<sup>+</sup> 379.9757, found 379.9756.

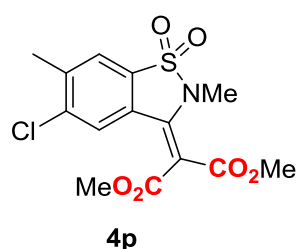

### Dimethyl

**2-(5-chloro-2,6-dimethyl-1,1-dioxidobenzo[d]isothiazol-3(2H)-ylidene)malonate (4p)** was prepared as an oil from 4-chloro-N,5-dimethyl-2-((trimethylsilyl)ethynyl)benzenesulfonamide (63.0 mg, 0.2 mmol) and CO<sub>2</sub> (4 MPa) according to the General Procedure **D** (eluent: ethyl acetate / petroleum ether: 1:5) in 62% yield (44.5 mg).

<sup>1</sup>H NMR (400 MHz, CDCl<sub>3</sub>) δ 7.74 – 7.73 (m, 2H), 3.90 (s, 3H), 3.84 (s, 3H), 3.17

(s, 3H), 2.51 (s, 3H).

$^{13}\text{C}$  NMR (101 MHz,  $\text{CDCl}_3$ )  $\delta$  166.4, 164.2, 144.2, 142.2, 140.6, 130.4, 127.3, 126.6, 123.1, 102.1, 53.2, 52.9, 30.7, 20.7.

**HRMS** (ESI-TOF)  $m/z$   $[\text{M} + \text{H}]^+$ : calcd. for  $[\text{C}_{14}\text{H}_{15}\text{ClNO}_6\text{S}]^+$  360.0303, found 360.0307.

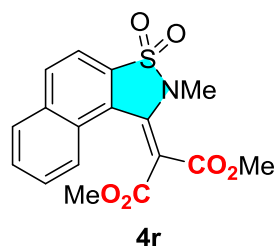

### Dimethyl

#### 2-(2-methyl-3,3-dioxido-1,2-dihydroisothiazol-1-ylidene)malonate (4r)

was prepared as an oil from *N*-methyl-1-((trimethylsilyl)ethynyl)naphthalene-2-sulfonamide (63.4 mg, 0.2 mmol) and  $\text{CO}_2$  (4 MPa) according to the General Procedure D (eluent: ethyl acetate / petroleum ether: 1:5) in 35% yield (25.2 mg)

$^1\text{H}$  NMR (400 MHz,  $\text{CDCl}_3$ )  $\delta$  8.38 (dd,  $J = 8.2, 1.3$  Hz, 1H), 8.06 (d,  $J = 8.9$  Hz, 1H), 7.98 (dd,  $J = 7.6, 1.4$  Hz, 1H), 7.81 – 7.74 (m, 2H), 7.62 (d,  $J = 8.9$  Hz, 1H), 3.92 (s, 3H), 3.88 (s, 3H), 3.27 (s, 3H).

$^{13}\text{C}$  NMR (101 MHz,  $\text{CDCl}_3$ )  $\delta$  166.9, 164.4, 146.0, 134.6, 134.0, 129.9, 129.7, 128.7, 128.6, 127.3, 124.7, 123.9, 120.5, 102.4, 53.2, 52.8, 30.9.

**HRMS** (ESI-TOF)  $m/z$   $[\text{M} + \text{H}]^+$ : calcd. for  $[\text{C}_{17}\text{H}_{16}\text{NO}_6\text{S}]^+$  362.0693, found 362.0686.

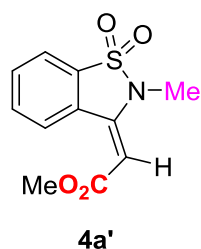

**Methyl (E)-2-(2-methyl-1,1-dioxidobenzo[d]isothiazol-3(2H)-ylidene)acetate** was prepared as an oil from 2-ethynyl-N-methylbenzenesulfonamide (39.0mg, 0.2 mmol) and CO<sub>2</sub> (4 MPa) (eluent: ethyl acetate / petroleum ether: 1:5) in 81% yield (41.0 mg).

<sup>1</sup>H NMR (400 MHz, CDCl<sub>3</sub>) δ 9.36 (dd, *J* = 7.9, 1.1 Hz, 1H), 7.88 (dd, *J* = 7.5, 1.4 Hz, 1H), 7.77 – 7.65 (m, 2H), 5.36 (s, 1H), 3.79 (s, 3H), 3.16 (s, 3H).

<sup>13</sup>C NMR (101 MHz, CDCl<sub>3</sub>) δ 166.3, 144.7, 133.8, 133.1, 132.0, 129.6, 127.5, 121.0, 94.7, 51.7, 26.4.

**HRMS** (ESI-TOF) *m/z* [M + Na]<sup>+</sup>: calcd. for [C<sub>11</sub>H<sub>11</sub>NNaO<sub>4</sub>S]<sup>+</sup> 276.0301, found 276.0307.

## VI. The Control Experiment and Proposed Mechanism

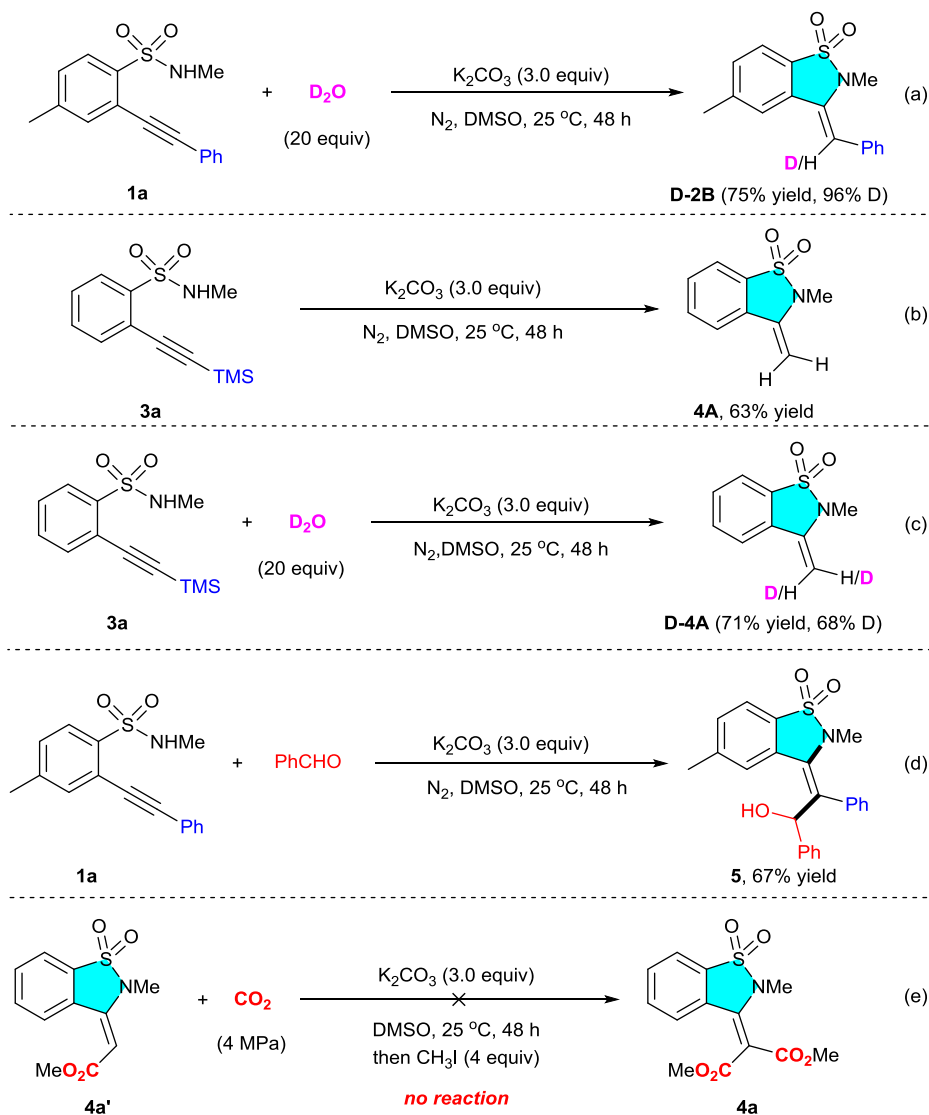

**Scheme S1. Control experiments**

### (a) The isotope labelling experiment of 1a with D<sub>2</sub>O

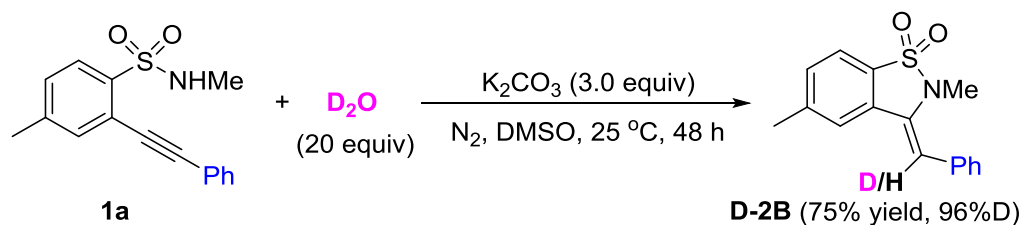

*O*-(1-Alkynyl)benzene sulfonamides **1a** (0.2 mmol, 57.0 mg),  $K_2CO_3$  (0.6 mmol, 82.8 mg),  $D_2O$  (72.3  $\mu L$ , 4.0 mmol, 20 equiv) and DMSO (2.0 mL) was added into a 20 mL Schlenk tube equipped with a Teflon cap. The reaction

vessel was evacuated to about -0.1 MPa (last 30 seconds per time) and backfilled with N<sub>2</sub> in three times. Then, the Schlenk tube was stirred at 25 °C for 48 h. After that, the reaction mixture was diluted by 5 mL saturated brine and extracted with ethyl acetate (EA) for at least 6 times (2 mL × 6). Subsequently, the combined organic layer was dried over anhydrous Na<sub>2</sub>SO<sub>4</sub> and concentrated under reduced pressure. The residue was purified by silica gel flash chromatography (PE/EA 5/1) to give the D-labelled compound **D-2B** as a slight yellow oil in 75% yield (42.9 mg, 96%D) with the *dr* of 1:5.8.

<sup>1</sup>H NMR (400 MHz, CDCl<sub>3</sub>) δ 7.70 (d, *J* = 8.0 Hz, 1.22H), 7.58 (brs, 1H), 7.44 – 7.36 (m, 6H), 7.31 – 7.26 (m, 1.2H), 6.94 (s, 0.16H), 6.59 (s, 0.04H), 3.20 (s, 0.52H), 2.94 (s, 3H), 2.50 (s, 3H), 2.18 (s, 0.52H).

Compound **2B** was synthesized by the reported procedure<sup>6</sup>

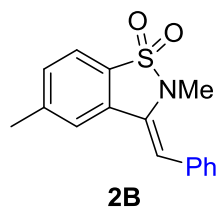

<sup>1</sup>H NMR (400 MHz, CDCl<sub>3</sub>) δ 7.71 (d, *J* = 8.0 Hz, 1H), 7.58 (s, 1H), 7.43 – 7.35 (m, 5H), 7.31 – 7.26 (m, 1H + overlapped with CDCl<sub>3</sub>), 6.59 (s, 1H), 2.94 (s, 3H), 2.50 (s, 3H).

<sup>13</sup>C NMR (101 MHz, CDCl<sub>3</sub>) δ 144.0, 134.1, 134.0, 132.8, 131.0, 129.6, 128.9, 128.2, 127.4, 120.9, 120.9, 105.5, 32.1, 21.9.

**(b) The control experiment with 3a**

---

<sup>6</sup> A. S. Reddy, A. L. S. Kumari, S. Saha, K. C. K. Swamy, *Adv. Synth. Catal.*, 2016, **358**, 1625–1638.



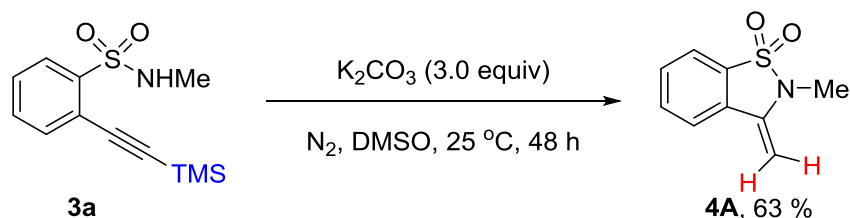

*N*-Methyl-2-((trimethylsilyl)ethynyl)benzenesulfonamide (0.2 mmol, 53.4 mg),  $\text{K}_2\text{CO}_3$  (3 equiv, 82.8 mg) and DMSO (2 mL) was added into a 20 mL Schlenk tube equipped with a Teflon cap. The reaction vessel was evacuated to about -0.1 MPa (last 30 seconds per time) and backfilled with  $\text{N}_2$  in three times. Then, the Schlenk tube was stirred at room temperature for 48 h. After that, the reaction mixture was diluted by 5 mL saturated brine and extracted with ethyl acetate (EA) for at least 6 times (2 mL  $\times$  6) and concentrated under reduced pressure. The residue was purified by silica gel flash chromatography (PE/EA= 5/1) to give the compound **4A** in 63% yield (24.6 mg).

$^1\text{H}$  NMR (400 MHz,  $\text{CDCl}_3$ )  $\delta$  7.82 (d,  $J$  = 7.7 Hz, 1H), 7.74 (d,  $J$  = 7.8 Hz, 1H), 7.67 – 7.63 (m, 1H), 7.61 – 7.56 (m, 1H), 5.00 (t,  $J$  = 2.2 Hz, 1H), 4.47 (t,  $J$  = 2.2 Hz, 1H), 3.15 (d,  $J$  = 1.8 Hz, 3H).

$^{13}\text{C}$  NMR (101 MHz,  $\text{CDCl}_3$ )  $\delta$  138.7, 133.0, 132.0, 130.3, 121.4, 121.0, 84.6, 25.8.

### (c) The isotope labelling experiment of 3a with $\text{D}_2\text{O}$

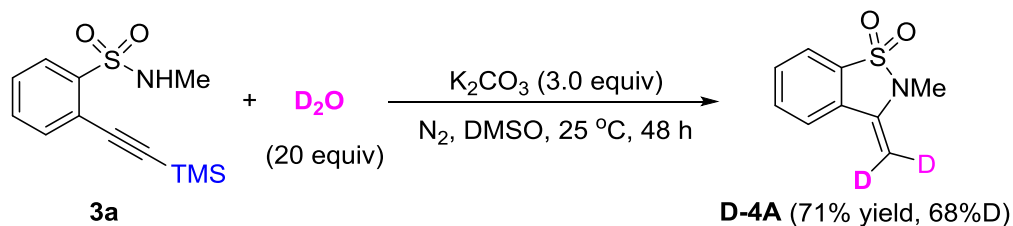

*N*-Methyl-2-((trimethylsilyl)ethynyl)benzenesulfonamide **3a** (0.2 mmol, 53.4

mg),  $\text{K}_2\text{CO}_3$  (0.6 mmol, 82.8 mg),  $\text{D}_2\text{O}$  (72.3  $\mu\text{L}$ , 4.0 mmol, 20 equiv) and DMSO (2.0 mL) was added into a 20 mL Schlenk tube equipped with a Teflon cap. The reaction vessel was evacuated to about -0.1 MPa (last 30 seconds per time) and backfilled with  $\text{N}_2$  in three times. Then, the Schlenk tube was stirred at 25 °C for 48 h. After that, the reaction mixture was diluted by 5 mL saturated brine and extracted with ethyl acetate (EA) for at least 6 times (2 mL  $\times$  6). Subsequently, the combined organic layer was dried over anhydrous  $\text{Na}_2\text{SO}_4$  and concentrated under reduced pressure. The residue was purified by silica gel flash chromatography (PE/EA 5/1) to give the D-labelled compound **D-4A** as a white solid in 71% yield (28.1 mg, 68% D).

$^1\text{H}$  NMR (400 MHz,  $\text{CDCl}_3$ )  $\delta$  7.81 – 7.79 (m, 1H), 7.73 – 7.70 (m, 1H), 7.65 – 7.61 (m, 1H), 7.58 – 7.54 (m, 1H), 4.98 (d,  $J$  = 2.8 Hz, 0.32H), 4.45 (d,  $J$  = 2.8 Hz, 0.32H), 3.12 (s, 3H).

**(d) The carbon anion trapping reaction with PhCHO**

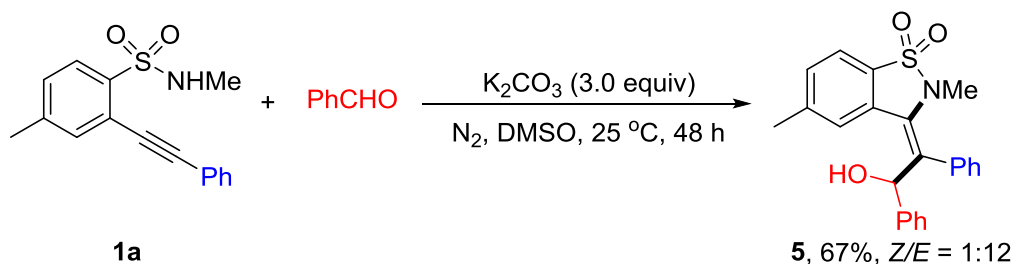

*O*-(1-Alkynyl)benzene sulfonamides **1a** (0.2 mmol, 57.0 mg),  $\text{K}_2\text{CO}_3$  (0.6 mmol, 82.8 mg), PhCHO (40.6  $\mu\text{L}$ , 0.4 mmol) and DMSO (2.0 mL) was added into a 20 mL Schlenk tube equipped with a Teflon cap. The reaction vessel was evacuated to about -0.1 MPa (last 30 seconds per time) and backfilled with  $\text{N}_2$  in three times. Then, the Schlenk tube was stirred at 25 °C for 48 h. After that, the reaction mixture was diluted by 5 mL saturated brine and extracted with ethyl acetate (EA) for at least 6 times (2 mL  $\times$  6). Subsequently, the combined organic layer was dried over anhydrous  $\text{Na}_2\text{SO}_4$  and concentrated under reduced pressure. The residue was purified by silica gel flash

chromatography (PE/EA 5/1) to give compound **5** as a colorless oil in 67% yield (52.4 mg) with the *Z/E* ratio of 1:12.

<sup>1</sup>H NMR (400 MHz, CDCl<sub>3</sub>) δ 8.09 (d, *J* = 7.4 Hz, 0.24H), 7.77 (d, *J* = 7.9 Hz, 1H), 7.69 (s, 1H), 7.48 – 7.45 (m, 0.42H), 7.42 – 7.38 (m, 3H), 7.36 – 7.28 (m, 3.5H), 7.25 – 7.22 (m, 3H), 7.08 – 7.05 (m, 2H), 6.47 (s, 1H), 2.62 – 2.61 (m, 0.5H), 2.50 (s, 3H), 2.42 (s, 3H).

<sup>13</sup>C NMR (101 MHz, CDCl<sub>3</sub>) δ 143.8, 140.7, 135.3, 134.5, 133.5, 132.8, 132.2, 130.8, 130.3, 128.5, 128.4, 128.1 (2C), 127.7, 126.2 (2C), 121.4, 72.0, 33.3, 22.2.

HRMS (ESI-TOF) *m/z* [M + H]<sup>+</sup>: calcd. for [C<sub>23</sub>H<sub>22</sub>NO<sub>3</sub>S]<sup>+</sup> 392.1315, found 392.1309.

(e) Control experiment of **4a'** and CO<sub>2</sub>

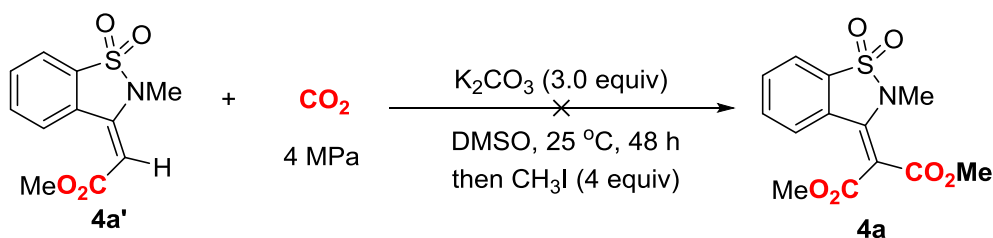

Under air, to an over-dried 20 mL vessel was added **4a'** (0.2 mmol, 50.6 mg), K<sub>2</sub>CO<sub>3</sub> (0.6 mmol, 3 equiv, 82.8 mg) and DMSO (2.0 mL). The vessel was fixed into a stainless steel autoclave. Then the autoclave was sealed and CO<sub>2</sub> was introduced from a cylinder. The reaction was carried out at 25 °C under magnetic stirring for 48 h and the pressure was kept constant (4 MPa) during the reaction. As the reaction was completed, the vessel was cooled to room temperature and the pressure was released slowly to atmospheric pressure. After that, MeI (0.8 mmol, 4 equiv, 52 μL) was added into the reaction mixture, and the reaction mixture was stirred at room temperature for about 2 h. After the analyzing by TLC, none of newly generated product could be detected, only **4a'** could be detected.

Based on the above results and some relative works,<sup>7</sup> a reasonable

<sup>7</sup> (a) D. Rambabu, N. S. P. V. Murthy, K. R. S. Prasad, A. Kandale, G. S. Deora, M. V.

mechanism is proposed in Scheme S1. Firstly, the sulfamine group in *o*-(1-alkynyl)benzenesulfonamide **1** is deprotonated by base, affording the sulfamide anion **A**. Next, *5-exo-dig* annulation of intermediate **A** generates the vinyl anion intermediate **B**. Sequentially, nucleophilic addition of its vinyl anion to CO<sub>2</sub> leads to intermediate **C**. Then, esterification of **C** furnishes the product **2**. Alternatively, when the alkyne bounded with TMS, desilylation would lead to the carbon anion **D**, which undergoes sequential carboxylation with a second molecule of CO<sub>2</sub> and esterification to afford the double carboxylation product **4**.

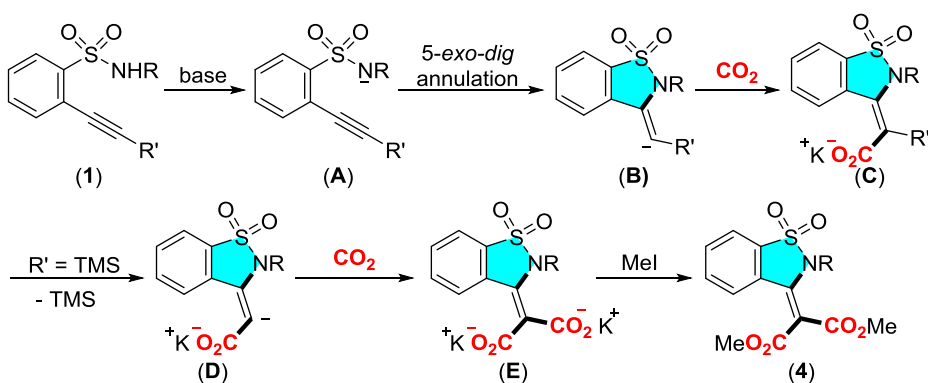

**Scheme S2. Proposed Mechanism**

---

B. Rao and M. Pal, *Tetrahedron Lett.*, 2012, **53**, 6577–6583. (b) S. Debnath and S. Mondal, *J. Org. Chem.*, 2015, **80**, 3940–3948. (c) B. M. Rao, J. S. Yadav, B. Sridharb and B. V. S. Reddy, *Org. Biomol. Chem.*, 2018, **16**, 5163–5166. (d) Q. Xiao, J. Sheng, Z. Chen and J. Wu, *Chem. Commun.*, 2013, **49**, 8647–8649.

## VII. Gram-Scale Reaction and Derivation

### (a) Gram-scale reaction of **1a** and CO<sub>2</sub>

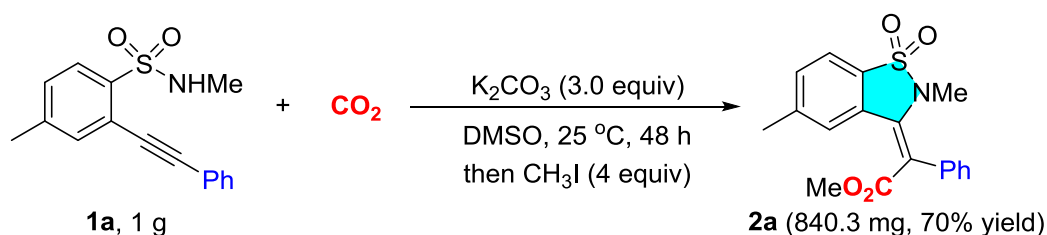

Under air, to an over-dried 100 mL Schlenk tube equipped with a Teflon cap was *o*-(1-alkynyl)benzenesulfonamides **1a** (3.5 mmol, 1.0 g), K<sub>2</sub>CO<sub>3</sub> (10.5 mmol, 3 equiv, 1.45 g) and DMSO (20.0 mL). The reaction vessel was evacuated to about -0.1 MPa (last 30 seconds per time) and backfilled with CO<sub>2</sub> (1 atm) in three times. Then, the Schlenk tube was stirred at 25 °C for 48 h. After that, MeI (14.0 mmol, 4 equiv, 0.88 mL) was added into the reaction mixture, and the reaction mixture was stirred at 50 °C for about 1 h, then, the reaction mixture was saturated brine and extracted with ethyl acetate (EA) for at least 6 times (10 mL × 6). Subsequently, the combined organic layer was dried over anhydrous Na<sub>2</sub>SO<sub>4</sub> and concentrated under reduced pressure. The residue was purified by silica gel flash chromatography (dichloromethane / petroleum ether: 1:1) to give the pure desired product **2a** (70%, 840.3 mg).

### (b) Gram-scale reaction of **3a** and CO<sub>2</sub>

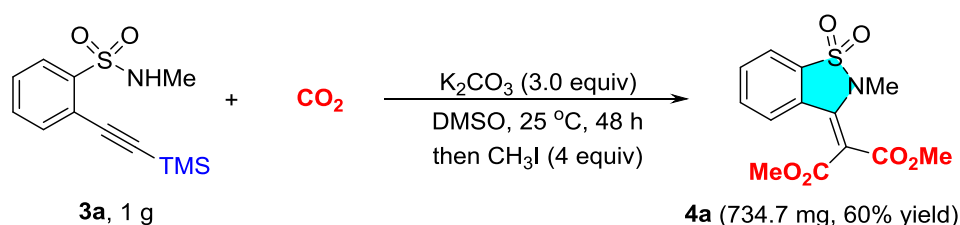

Under air, to an over-dried 100 mL polytetrafluoroethylene (PTFE) reaction vessel, *N*-methyl-2-((trimethylsilyl)ethynyl)benzenesulfonamide **3a** (3.75 mmol, 1.0 g), K<sub>2</sub>CO<sub>3</sub> (11.2 mmol, 3 equiv, 1.55 g) and DMSO (20.0 mL) was added sequentially. The vessel was fixed into a stainless-steel autoclave

with a pressure-regulating system. Then the autoclave was sealed and CO<sub>2</sub> was introduced from a cylinder (4 MPa). Then, the autoclave was stirred at 25 °C for 48 h. After that, MeI (15.0 mmol, 4 equiv, 0.94 mL) was added into the reaction mixture, and the reaction mixture was stirred at 25 °C for about 1 h, then, the reaction mixture was saturated brine and extracted with ethyl acetate (EA) for at least 6 times (10 mL × 6). Subsequently, the combined organic layer was dried over anhydrous Na<sub>2</sub>SO<sub>4</sub> and concentrated under reduced pressure. The residue was purified by silica gel flash chromatography (ethyl acetate / petroleum ether: 1:5) to give the pure desired product **4a** (60%, 734.7 mg).

**(c) Reduction of 2a by LiAlH<sub>4</sub>**

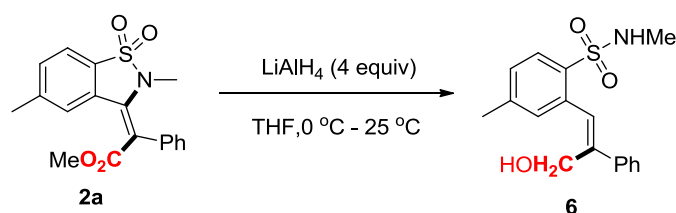

Under N<sub>2</sub>, to a 50 mL round bottom flask equipped with a stir bar was added **2a** (0.5 mmol, 171.6 mg), anhydrous THF (4 mL) and the reaction mixture was cooled down to 0 °C. Then, LiAlH<sub>4</sub> (2 mmol, 75.9 mg, 4 equiv) was added to the mixture slowly. After that, the reaction mixture was allowed to warm to room temperature and stirred overnight. Upon completion (monitored by TLC), it was quenched with aqueous NaOH solution and filtered through a plug of celite. Then, the reaction mixture was extracted with ethyl acetate (3 × 15 mL), dried over Na<sub>2</sub>SO<sub>4</sub> and concentrated under reduced pressure. The residue was purified by silica gel flash chromatography to afford compound **6** as a white solid in 69% yield (109.1 mg).

<sup>1</sup>H NMR (300 MHz, CDCl<sub>3</sub>) 7.84 (d, *J* = 8.0 Hz, 1H), 7.38 – 7.34 (m, 1H), 7.24 – 7.20 (m, 3H + overlapped with CDCl<sub>3</sub>), 7.10 – 7.01 (m, 3H), 6.71 (s, 1H), 5.57 (brs, 1H), 4.55 (s, 2H), 2.56 (d, *J* = 5.1 Hz, 3H), 2.06 (s, 3H).

$^{13}\text{C}$  NMR (75 MHz,  $\text{CDCl}_3$ )  $\delta$  144.4, 142.5, 137.4, 135.8, 133.6, 133.1, 129.9, 128.6, 128.4, 127.6, 127.3, 122.8, 66.9, 28.9, 21.1.

**HRMS** (ESI-TOF)  $m/z$   $[\text{M} + \text{Na}]^+$ : calcd. for  $[\text{C}_{17}\text{H}_{19}\text{NNaO}_3\text{S}]^+$  340.0978, found 340.0980.

**(d) Reduction of 2a by  $\text{H}_2$**

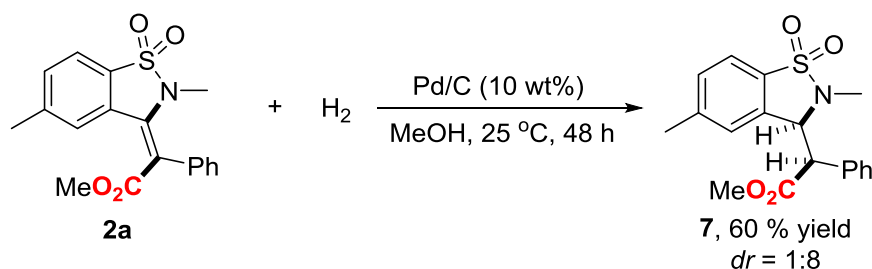

In a 10 mL vial, 10 wt% Pd/C (22.0 mg, 0.01 mmol) was added to a solution of compound **2a** (64.1 mg, 0.225 mmol) in MeOH (4.0 mL) at room temperature. The 10 mL vial was placed in a 100 mL reaction still which was filled with  $\text{H}_2$  (40 atm). The reaction mixture was then stirred for 48 h at 25  $^\circ\text{C}$ . Upon completion, the mixture was filtered through a pad of Celite. The filtrate was concentrated in vacuo and the residue purified by flash column chromatography (3:1 petroleum ether: EtOAc) to obtain (**e**) in 60% yield (46.6 mg) with the  $dr$  ratio of about 1:8.

$^1\text{H}$  NMR (400 MHz,  $\text{CDCl}_3$ )  $\delta$  7.62 (d,  $J = 7.8$  Hz, 0.16H), 7.57 (d,  $J = 7.9$  Hz, 1H), 7.44 – 7.27 (m, 4H), 7.20 – 7.15 (m, 3.24H), 5.71 (brs, 1H), 4.83 (d,  $J = 9.4$  Hz, 0.14H), 4.78 (d,  $J = 10.3$  Hz, 1H), 3.94 (d,  $J = 9.3$  Hz, 0.16H), 3.91 (d,  $J = 10.4$  Hz, 1H), 3.73 (s, 3H), 3.70 (s, 0.36H), 2.98 (s, 3H), 2.41 (s, 0.36H), 2.39 (s, 0.36H), 2.08 (s, 3H).

$^{13}\text{C}$  NMR (101 MHz,  $\text{CDCl}_3$ )  $\delta$  172.5, 143.6, 142.3, 136.3, 134.8, 134.4, 133.0, 130.5, 130.2, 129.5, 129.0, 128.9, 128.8, 128.5, 128.2, 126.4, 125.0, 121.2, 120.8, 67.2, 66.5, 57.4, 57.1, 52.5, 52.3, 36.2, 33.5, 21.8, 21.4.

**HRMS** (ESI-TOF)  $m/z$   $[\text{M} + \text{Na}]^+$ : calcd. for  $[\text{C}_{18}\text{H}_{19}\text{NNaO}_4\text{S}]^+$  368.0927, found 368.0930.

(e) The reaction of 2a with 2-hydroxyisoindoline-1,3-dione

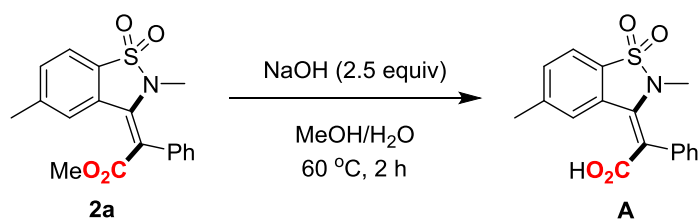

**Methyl**

(E)-2-(2,5-dimethyl-1,1-dioxidobenzo[d]isothiazol-3(2H)-ylidene)-2-phenylacetate (68.6 mg, 0.2 mmol), NaOH (0.5 mmol, 2.5 equiv, 20 mg) was dissolved into a mixture of MeOH (6 mL) and H<sub>2</sub>O (3 mL). The obtained solution was heated at 60 °C for 2 h in oil bath. After cooled to room temperature, ethyl acetate and H<sub>2</sub>O was added and the water phase was collected. Then 1 mol/L HCl was added to adjust the pH to 1 and followed by the extraction by ethyl acetate. The collected organic phase was dried by MgSO<sub>4</sub> and evaporated in vacuo. The obtained white solid was used in the next step without further purification.

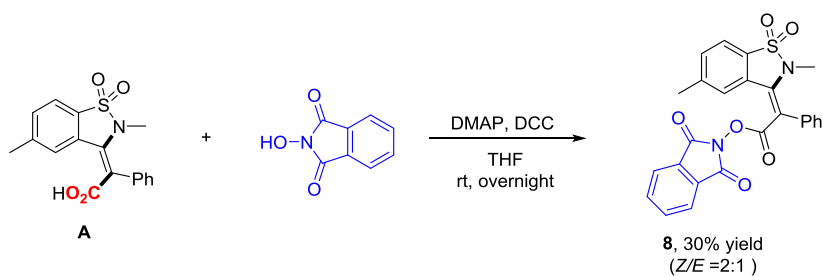

To a solution of A in THF (2 mL) was added 2-hydroxyisoindoline-1,3-dione (41 mg, 1.66 equiv, 0.33 mmol), 4-dimethylaminopyridine (1.2 mg, 5 mol%) and dicyclohexylcarbodiimide (62 mg, 1.5 equiv, 0.3 mmol) sequentially. Then, the reaction mixture was stirred at room temperature overnight. The mixture was filtered and evaporated in vacuo. The obtained crude was then purified by silica chromatography (2:1 petroleum ether: EtOAc) to give pure 8 (28.5 mg, 30% yield) with the Z/E ratio of 2:1.

<sup>1</sup>H NMR (400 MHz, CDCl<sub>3</sub>) δ 8.23 (s, 0.5H), 7.92 (dd, *J* = 5.5, 3.1 Hz, 1H), 7.88 (dd, *J* = 5.5, 3.1 Hz, 2H), 7.83 – 7.77 (m, 3.5H), 7.72 (d, *J* = 7.9 Hz, 1H), 7.58 (dd,



$J = 6.8, 2.9$  Hz, 2H), 7.52 (m, 4H), 7.48 – 7.38 (m, 2H), 7.35 (d,  $J = 8.0$  Hz, 1H), 6.14 (s, 1H), 3.36 (s, 3H), 2.74 (s, 1.5H), 2.61 (s, 1.5H), 2.09 (s, 3H).

$^{13}\text{C}$  NMR (101 MHz,  $\text{CDCl}_3$ )  $\delta$  166.1, 163.1, 162.6, 162.2, 162.1, 161.5, 148.8, 145.4, 144.9, 144.1, 142.9, 134.9, 134.7 (2C), 134.6, 134.0, 133.0, 132.5, 131.7, 130.8, 130.7, 129.8 (2C), 129.5, 129.4, 129.3 (2C), 129.1, 129.0, 128.9, 128.8, 128.7, 127.9, 126.7, 126.5, 124.0, 123.9, 123.8, 121.1, 121.0, 105.1, 103.5, 31.6, 31.5, 21.9, 21.8.

HRMS (ESI-TOF)  $m/z$   $[\text{M} + \text{H}]^+$ : calcd. for  $[\text{C}_{25}\text{H}_{19}\text{N}_2\text{O}_6\text{S}]^+$  475.0958, found 475.0972.

#### (f) Derivation of 2c

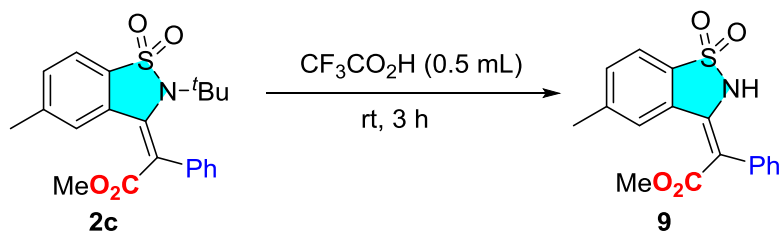

A solution of **2c** (77.0 mg, 0.2 mmol) in  $\text{CF}_3\text{CO}_2\text{H}$  (0.5 mL) was stirred at room temperature for about 3 h. Then, the mixture was terminated by saturated brine water and extracted by ethyl acetate. The collected organic phase was dried by  $\text{Na}_2\text{SO}_4$  and evaporated in vacuo. The obtained crude was then purified by silica chromatography (1:1 petroleum ether: EtOAc) to give **2c'** as colorless oil in 31% yield (20.5 mg).

$^1\text{H}$  NMR (400 MHz,  $\text{CDCl}_3$ )  $\delta$  7.97 (s, 1H), 7.83 (d,  $J = 8.1$  Hz, 1H), 7.57 (dd,  $J = 7.4, 2.2$  Hz, 2H), 7.49 – 7.46 (m, 3H), 7.35 (d,  $J = 8.0$  Hz, 1H), 3.47 (s, 3H), 2.49 (s, 3H).

$^{13}\text{C}$  NMR (101 MHz,  $\text{CDCl}_3$ )  $\delta$  167.6, 143.2, 142.5, 134.6, 130.9, 130.8, 128.9, 128.8, 128.6, 128.5, 126.1, 121.3, 111.4, 52.2, 22.0.

HRMS (ESI-TOF)  $m/z$   $[\text{M} + \text{H}]^+$ : calcd. for  $[\text{C}_{17}\text{H}_{16}\text{NO}_4\text{S}]^+$  330.0795, found 330.0792.

## IX. Synthesis of TACE Inhibitor

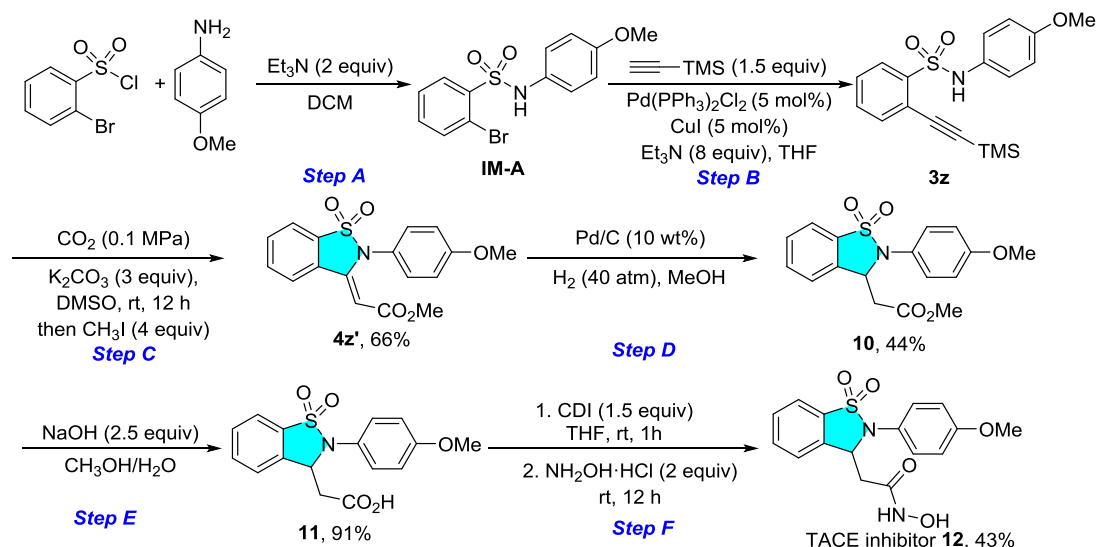

### Procedure:

**Steps A-B:** Firstly, the *o*-(1-alkynyl)benzenesulfonamide **3z** was synthesized according to the General Procedure **B** by using 2-bromobenzenesulfonyl chloride (2.5 g, 10 mmol) and 4-methoxyaniline (1.5 g, 12 mmol), furnishing **IM-A** in 86% yield (2.9 g, 8.6 mmol). Then, Sonogashira reaction of **IM-A** with ethynyltrimethylsilane (1 g, 10.3 mmol) lead to **3z** as yellow oil in 75% yield (2.3 g, 6.5 mmol).

**Steps C:** Then, the mono-carboxylation reaction of **3z** with CO<sub>2</sub> was conducted according to General Procedure **C** furnished product **4z'** as brown oil in 66% yield (1.5 g, 4.3 mmol).

**Steps D-E:** In a 20 mL vial, 10 wt % Pd/C (34.5 mg) was added to a solution of compound **4z'** (345 mg, 1 mmol) in MeOH (10 mL) at room temperature. The 20 mL vial was placed in a 100 mL reaction still which was filled with H<sub>2</sub> (40 atm). The reaction mixture was then stirred for 48 h at 25 °C. Upon completion, the mixture was filtered through a pad of Celite. The filtrate was concentrated in vacuo and the residue purified by flash column chromatography (5:1 petroleum ether: EtOAc) to obtain **10** as colorless oil in 44% yield (152.7 mg).

In a 50 mL round bottle flask, compound **11** (173.5 mg, 0.5 mmol), NaOH (1.25 mmol, 2.5 equiv, 50 mg) was dissolved into a mixture of MeOH (10 mL) and H<sub>2</sub>O (5 mL). The obtained solution was heated at 65 °C for 3 h in oil bath. After cooled to room temperature, ethyl acetate and H<sub>2</sub>O was added and the water phase was collected. Then 1 mol/L HCl was added to adjust the pH to 1 and followed by the extraction by ethyl acetate. The collected organic phase was dried by MgSO<sub>4</sub> and evaporated in vacuo, furnishing compound **10** as a white solid in 91% yield (151.5 mg), which was used in the next step without further purification.

**Steps F:** To a solution of compound **12** in THF (2 mL) was added 1,1'-carbonyldiimidazole (48 mg, 1.5 equiv, 0.3 mmol). The reaction mixture was stirred at room temperature for 1h. Then hydroxylamine hydrochloride (27.8 mg, 2 equiv, 0.4 mmol) was added, then, the reaction mixture was stirred at room temperature overnight. The mixture was filtered and evaporated in vacuo. The obtained crude was then purified by silica chromatography (1:1 petroleum ether: EtOAc) to give pure **11** (29.9 mg, 43% yield).

<sup>1</sup>H NMR (400 MHz, CDCl<sub>3</sub>) δ 9.13 (brs, 1H), 7.78 (d, *J* = 7.3 Hz, 1H), 7.53 (q, *J* = 7.4, 6.9 Hz, 2H), 7.43 (s, 1H), 7.33 (d, *J* = 8.1 Hz, 2H), 6.91 (d, *J* = 8.2 Hz, 2H), 5.35 – 5.34 (m, 1H), 3.78 (s, 3H), 2.71 – 2.67 (m, 1H), 2.48 – 2.45 (m, 1H).

<sup>13</sup>C NMR (101 MHz, CDCl<sub>3</sub>) δ 159.6, 149.0, 136.1, 134.2, 133.3, 129.9, 129.1, 125.9, 124.3, 121.5, 115.2, 59.6, 55.5, 37.1.

**HRMS** (ESI-TOF) *m/z* [M + H]<sup>+</sup>: calcd. for [C<sub>16</sub>H<sub>17</sub>N<sub>2</sub>O<sub>5</sub>S]<sup>+</sup> 349.0853, found 349.0847.

## IX. Crystallographic Data of 2a and 4f

### (a) X-Ray crystallographic data of 2a

The crystal structures have been deposited at the Cambridge Crystallographic Data Centre (2174206, **2a**). The data can be obtained free of charge via the internet at <https://www.ccdc.cam.ac.uk/structures/>. The measurements were taken in a Bruker APEX-II CCD diffractometer. The crystal was kept at 128.0 K during data collection. Using Olex2, the structure was solved with the olex2.solve structure solution program using Charge Flipping and refined with the SHELXL refinement package using Least Squares minimisation.

**Method of crystallization:** A solution of **2a** in ethyl acetate and hexane was evaporated the solvent slowly at room temperature.

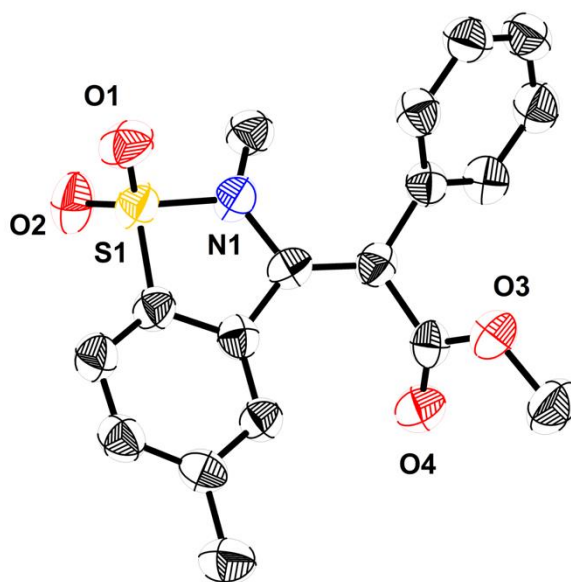

Figure S1. Solid state structure of **2a**. Thermal ellipsoids are drawn at the 30% probability level, and hydrogen atoms are omitted for clarity.

**Table S1** Crystallographic data of complex **2a**

|                   |                                                   |
|-------------------|---------------------------------------------------|
| CCDC number       | 2348034                                           |
| Empirical formula | C <sub>18</sub> H <sub>17</sub> NO <sub>4</sub> S |
| Formula weight    | 343.38                                            |
| Temperature [K]   | 128.00                                            |

|                                           |                                                                  |
|-------------------------------------------|------------------------------------------------------------------|
| Crystal system                            | monoclinic                                                       |
| Space group (number)                      | $P2_1/c$ (14)                                                    |
| $a$ [Å]                                   | 9.907(4)                                                         |
| $b$ [Å]                                   | 10.099(4)                                                        |
| $c$ [Å]                                   | 17.406(7)                                                        |
| $\alpha$ [°]                              | 90                                                               |
| $\beta$ [°]                               | 104.78(3)                                                        |
| $\gamma$ [°]                              | 90                                                               |
| Volume [Å <sup>3</sup> ]                  | 1683.8(12)                                                       |
| $Z$                                       | 4                                                                |
| $\rho_{\text{calc}}$ [gcm <sup>-3</sup> ] | 1.355                                                            |
| $\mu$ [mm <sup>-1</sup> ]                 | 1.239                                                            |
| $F(000)$                                  | 720                                                              |
| Crystal size [mm <sup>3</sup> ]           | 0.3×0.2×0.2                                                      |
| Crystal colour                            | clear light colourless                                           |
| Crystal shape                             | block                                                            |
| Radiation                                 | GaK $\alpha$ ( $\lambda=1.34138$ Å)                              |
| 2 $\theta$ range [°]                      | 8.88 to 105.94 (0.84 Å)                                          |
| Index ranges                              | -11 ≤ $h$ ≤ 11<br>-12 ≤ $k$ ≤ 7<br>-20 ≤ $l$ ≤ 20                |
| Reflections collected                     | 11571                                                            |
| Independent reflections                   | 2909<br>$R_{\text{int}} = 0.1688$<br>$R_{\text{sigma}} = 0.1287$ |
| Completeness to $\theta = 52.968^\circ$   | 98.0 %                                                           |
| Data / Restraints / Parameters            | 2909/0/221                                                       |
| Goodness-of-fit on $F^2$                  | 0.998                                                            |
| Final $R$ indexes                         | $R_1 = 0.0818$                                                   |
| [ $I \geq 2\sigma(I)$ ]                   | $wR_2 = 0.2078$                                                  |
| Final $R$ indexes                         | $R_1 = 0.1198$                                                   |
| [all data]                                | $wR_2 = 0.2496$                                                  |
| Largest peak/hole [eÅ <sup>-3</sup> ]     | 0.38/-0.46                                                       |
| Extinction coefficient                    | 0.039(6)                                                         |

### (b) X-Ray crystallographic data of 4f

The crystal structures have been deposited at the Cambridge Crystallographic Data Centre (2280046, 4f). The data can be obtained free of charge via the internet at <https://www.ccdc.cam.ac.uk/structures/>. The

measurements were taken in a Bruker APEX-II CCD diffractometer. The crystal was kept at 128.0 K during data collection. Using Olex2, the structure was solved with the olex2.solve structure solution program using Charge Flipping and refined with the SHELXL refinement package using Least Squares minimisation.

**Method of crystallization:** A solution of **4f** in ethyl acetate and hexane was evaporated the solvent slowly at room temperature.

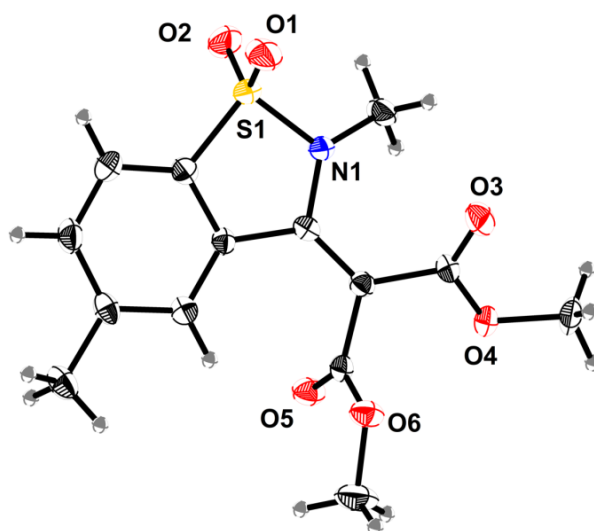

Figure S2. Solid state structure of **4f**. Thermal ellipsoids are drawn at the 30% probability level.

**Table S2** Crystallographic data of complex **4f**

|                          |                                                   |
|--------------------------|---------------------------------------------------|
| CCDC number              | 2280046                                           |
| Empirical formula        | C <sub>14</sub> H <sub>15</sub> NO <sub>6</sub> S |
| Formula weight           | 325.33                                            |
| Temperature [K]          | 150.00                                            |
| Crystal system           | triclinic                                         |
| Space group (number)     | $P\bar{1}$ (2)                                    |
| <i>a</i> [Å]             | 7.9471(6)                                         |
| <i>b</i> [Å]             | 7.9767(6)                                         |
| <i>c</i> [Å]             | 12.2761(10)                                       |
| $\alpha$ [°]             | 74.518(2)                                         |
| $\beta$ [°]              | 88.476(3)                                         |
| $\gamma$ [°]             | 84.620(2)                                         |
| Volume [Å <sup>3</sup> ] | 746.66(10)                                        |

|                                              |                                                                  |
|----------------------------------------------|------------------------------------------------------------------|
| Z                                            | 2                                                                |
| $\rho_{\text{calc}}$ [gcm <sup>-3</sup> ]    | 1.447                                                            |
| $\mu$ [mm <sup>-1</sup> ]                    | 0.246                                                            |
| $F(000)$                                     | 340                                                              |
| Crystal size [mm <sup>3</sup> ]              | 0.3×0.2×0.2                                                      |
| Crystal colour                               | clear light colourless                                           |
| Crystal shape                                | block                                                            |
| Radiation                                    | MoK $\alpha$ ( $\lambda=0.71073$ Å)                              |
| 2 $\theta$ range [°]                         | 5.15 to 55.11 (0.77 Å)                                           |
| Index ranges                                 | -10 ≤ h ≤ 10<br>-10 ≤ k ≤ 10<br>-15 ≤ l ≤ 15                     |
| Reflections collected                        | 14032                                                            |
| Independent reflections                      | 3395<br>$R_{\text{int}} = 0.0634$<br>$R_{\text{sigma}} = 0.0514$ |
| Completeness to<br>$\theta = 25.242^\circ$   | 98.9 %                                                           |
| Data / Restraints / Parameters               | 3395/0/203                                                       |
| Absorption correction                        | 0.5337/0.7456                                                    |
| T <sub>min</sub> /T <sub>max</sub> (method)  | (multi-scan)                                                     |
| Goodness-of-fit on $F^2$                     | 1.079                                                            |
| Final $R$ indexes<br>[ $I \geq 2\sigma(I)$ ] | $R_1 = 0.0539$<br>$wR_2 = 0.1171$                                |
| Final $R$ indexes<br>[all data]              | $R_1 = 0.0733$<br>$wR_2 = 0.1375$                                |
| Largest peak/hole [eÅ <sup>-3</sup> ]        | 0.45/-0.61                                                       |

7.9889  
7.9680  
7.7109  
7.7059  
7.6165  
7.6124  
7.6107  
7.6044  
7.6017  
7.5978  
7.5952  
7.5923  
7.4923  
7.4872  
7.4713  
7.4663  
7.4136  
7.4105  
7.4050  
7.3990  
7.3931  
7.3909  
7.3879  
7.3824  
7.3790  
7.2600  
5.0738  
5.0602  
5.0466  
5.0330

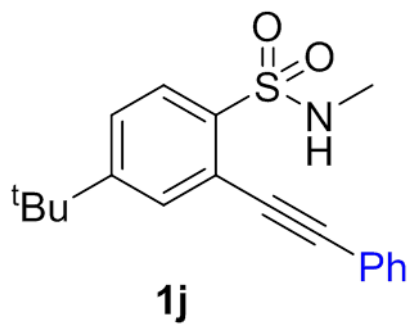

CDCl<sub>3</sub>, 400 MHz

*s* *s* *s* *s*

*s*

2.6182  
2.6046

1.3599

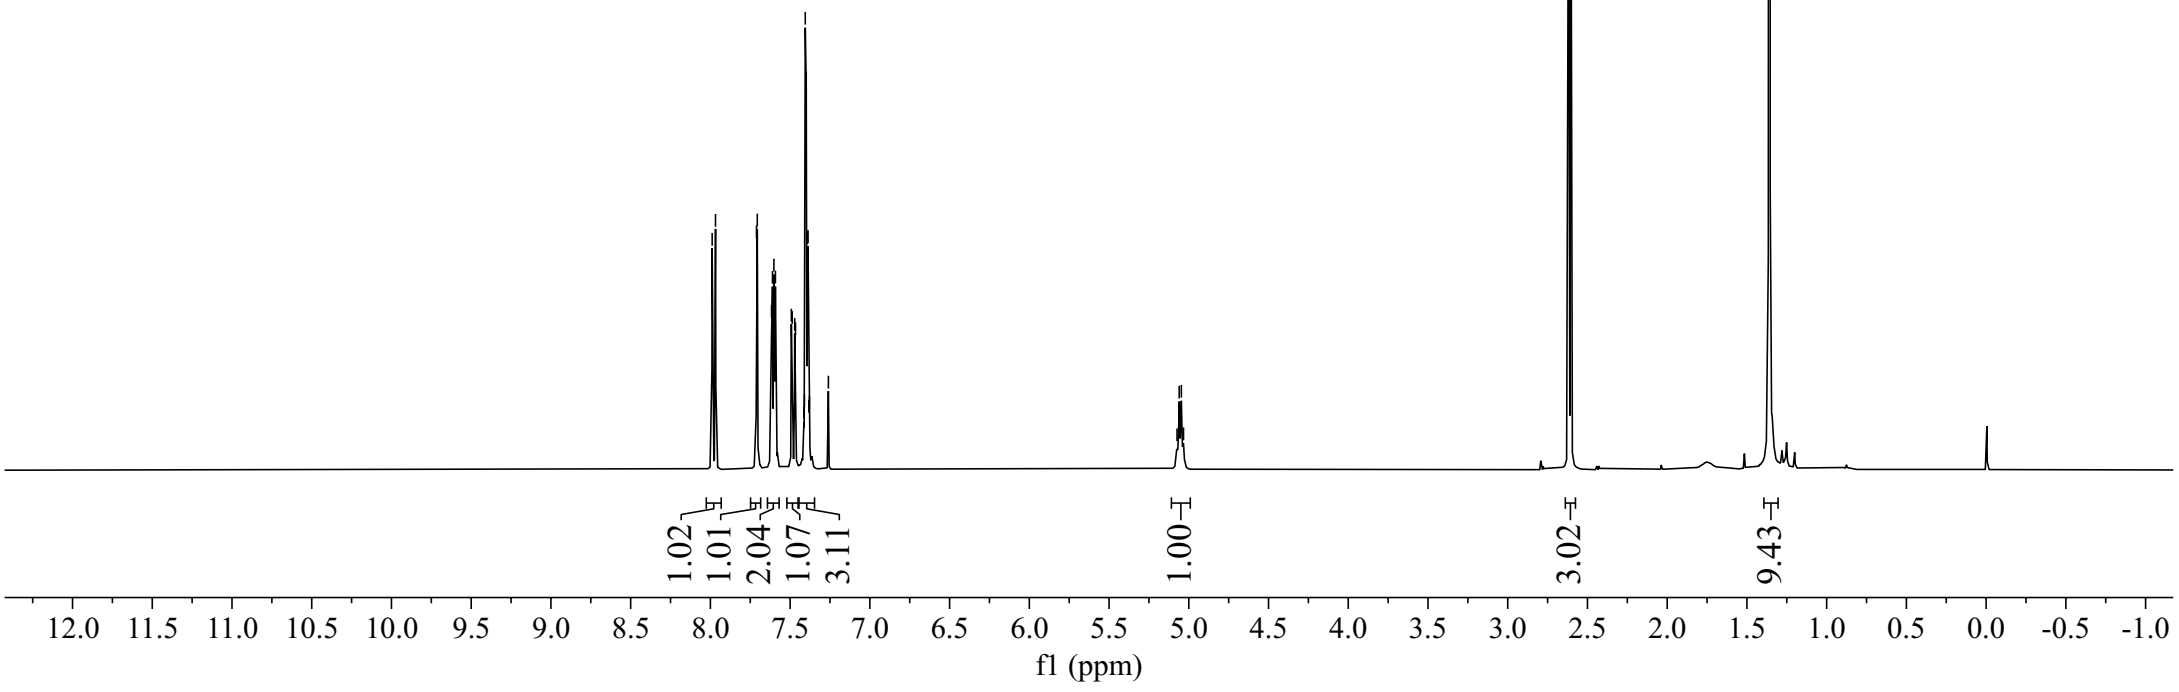



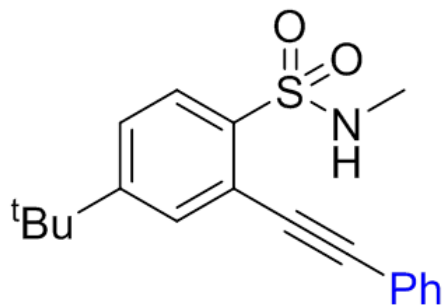

**1j**

CDCl<sub>3</sub>, 101 MHz

156.00  
136.36  
131.69  
131.27  
129.69  
129.32  
128.59  
125.61  
121.86  
120.14

96.57  
86.10  
77.32  
77.00  
76.68

35.03  
30.91  
29.51

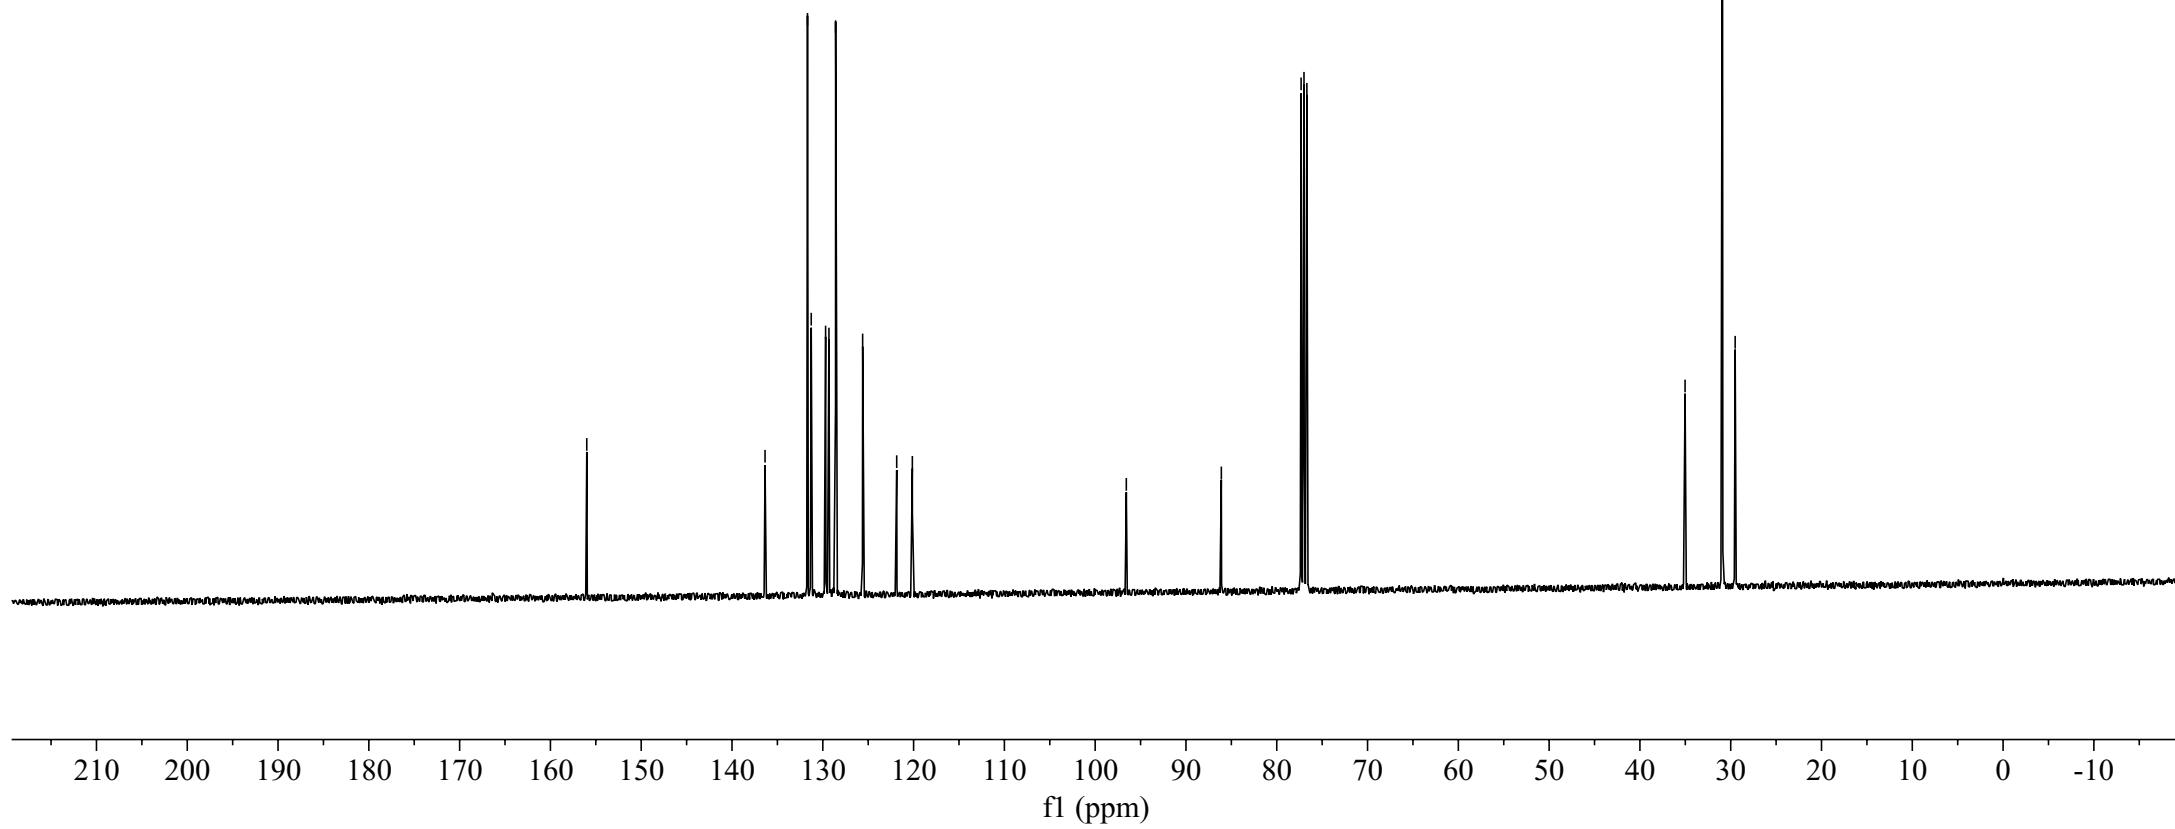

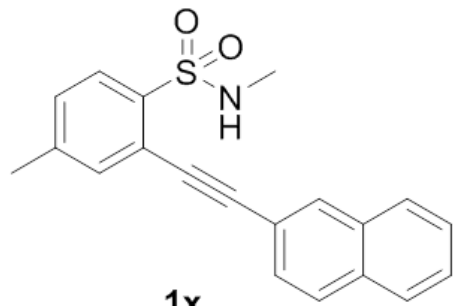

CDCl<sub>3</sub>, 400 MHz

8.1180  
7.9822  
7.9621  
7.8711  
7.8633  
7.8545  
7.8439  
7.8376  
7.6243  
7.6204  
7.6029  
7.5989  
7.5770  
7.5730  
7.5597  
7.5502  
7.5423  
7.5345  
7.5264  
7.3065  
7.3037  
7.3005  
7.2861  
7.2834  
7.2802  
5.1006  
5.0863

2.6266  
2.6129  
2.4484

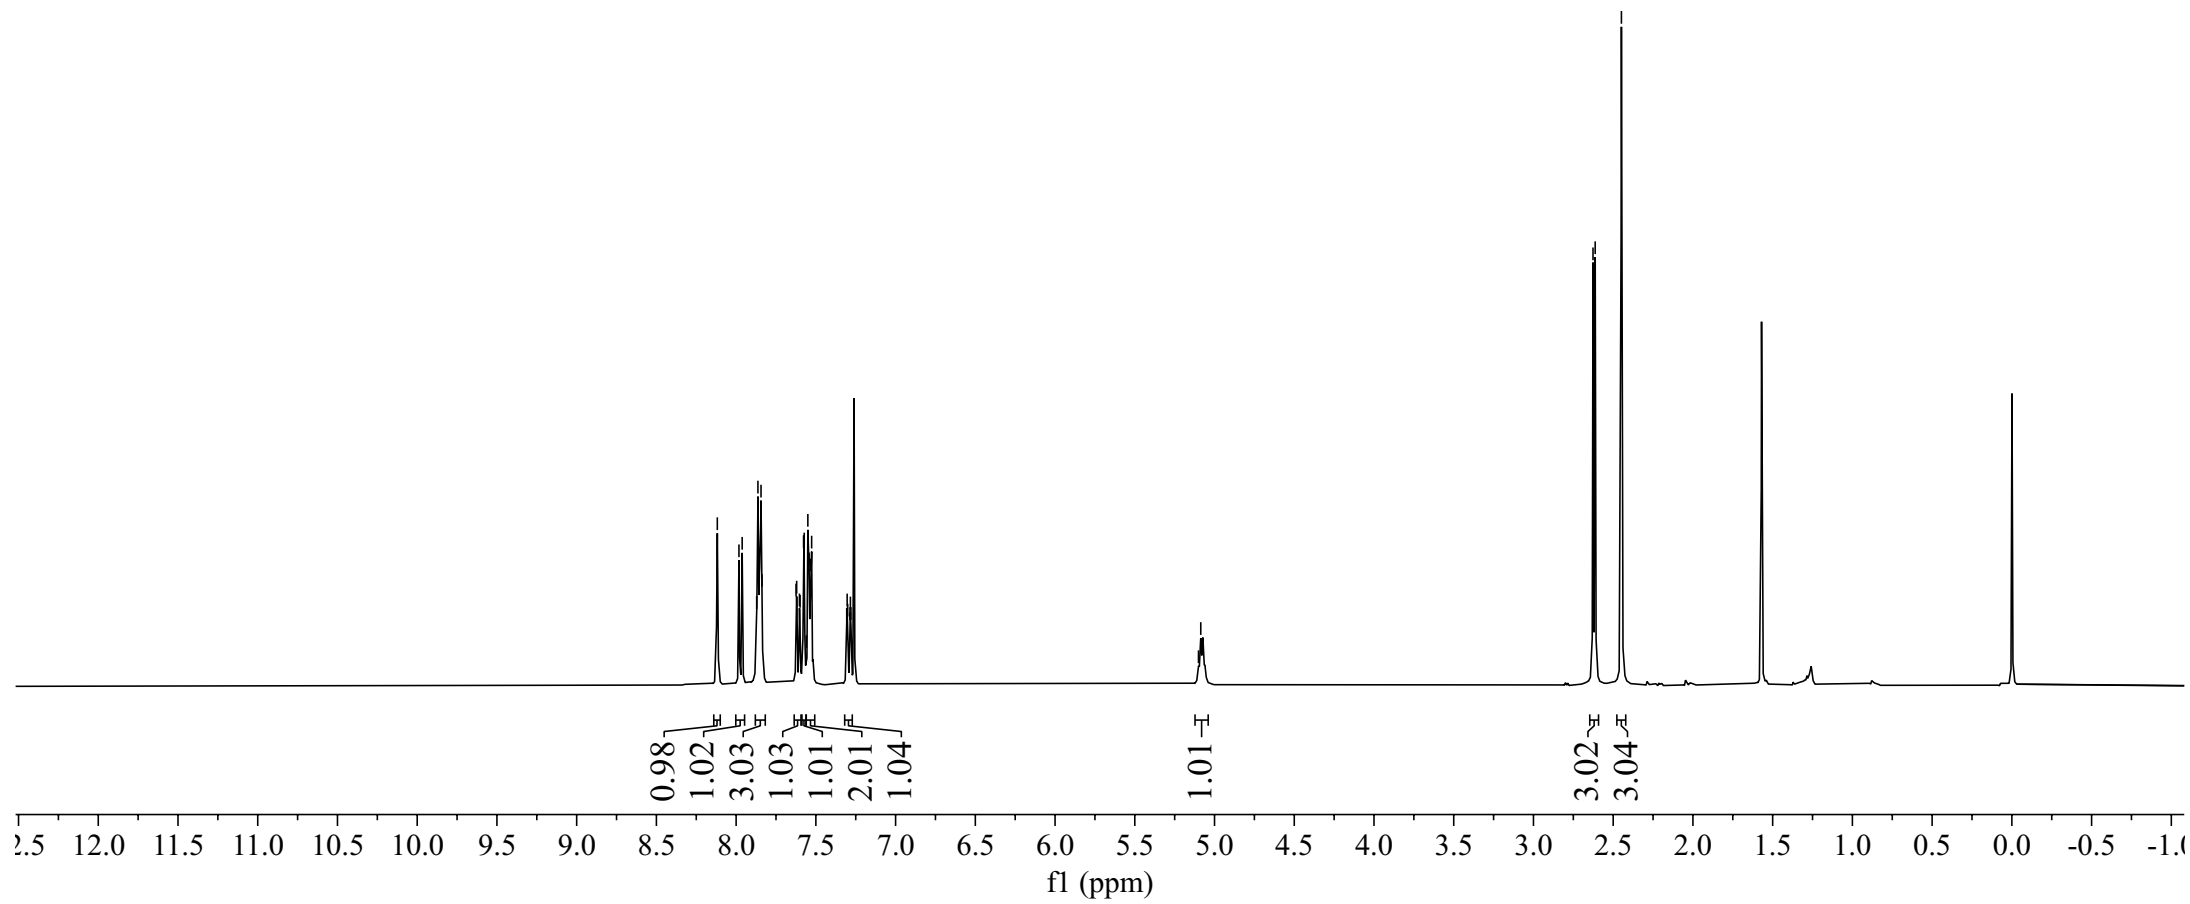

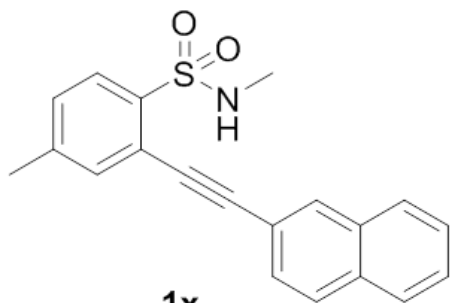

CDCl<sub>3</sub>, 101 MHz

143.03  
136.34  
134.57  
133.13  
132.77  
131.97  
129.80  
129.10  
128.31  
127.88  
127.83  
127.75  
127.21  
126.78  
120.40  
119.05  
-97.34  
85.99  
77.32  
77.00  
76.68  
-29.47  
-21.12

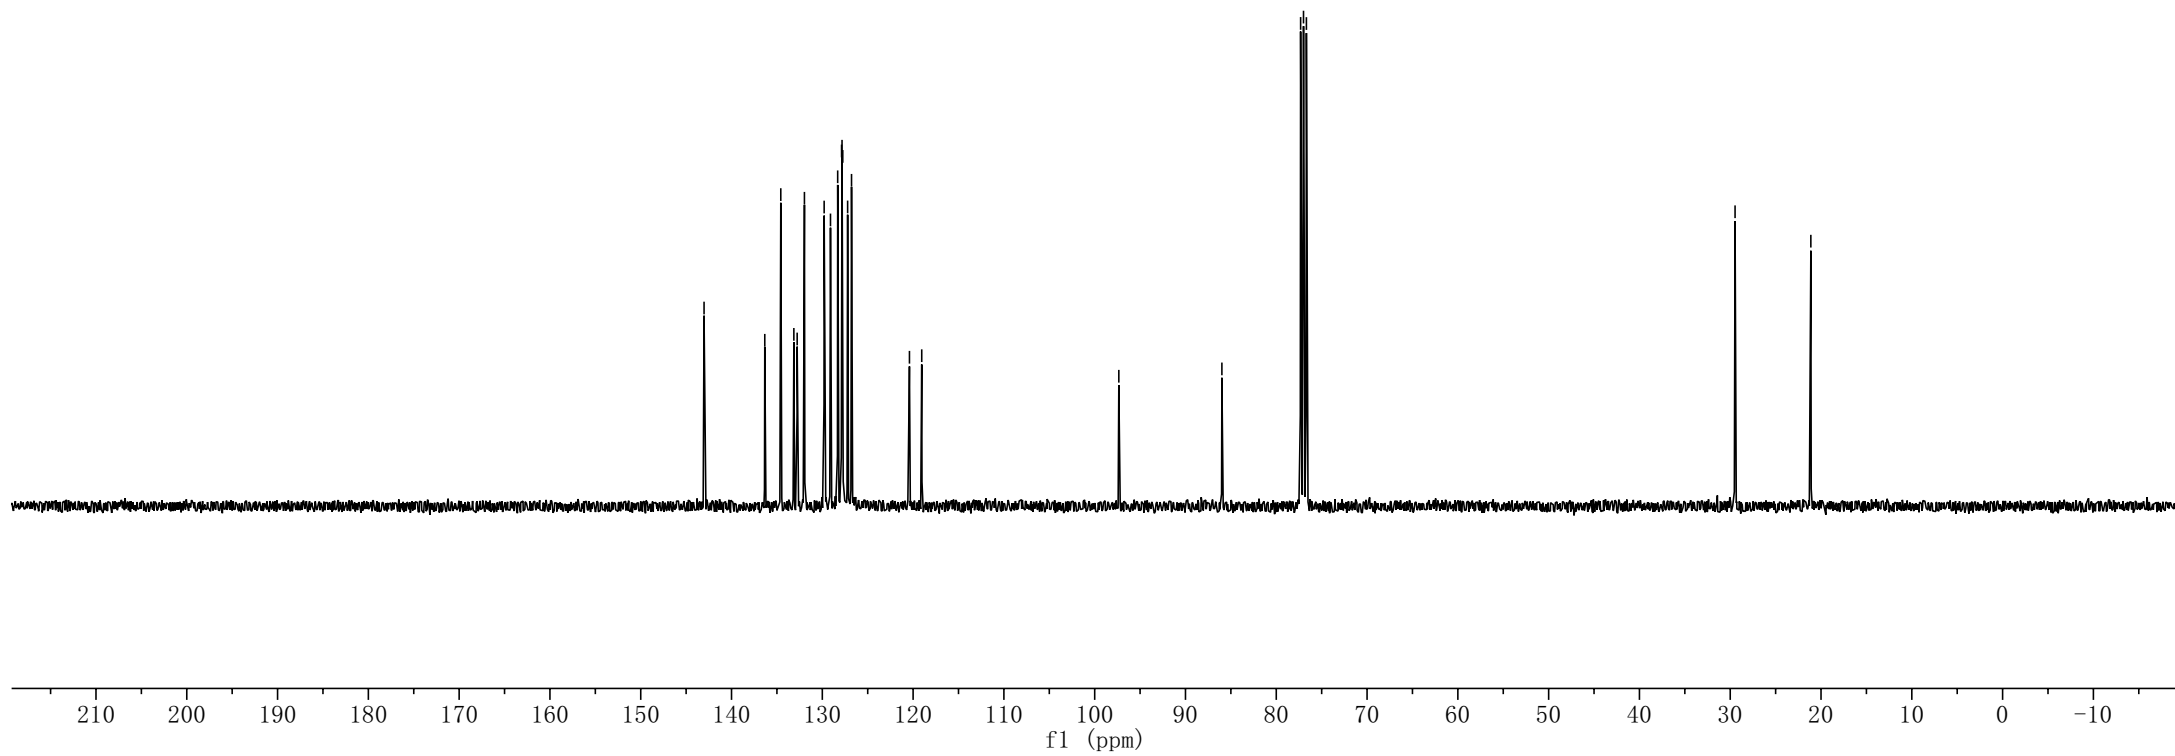

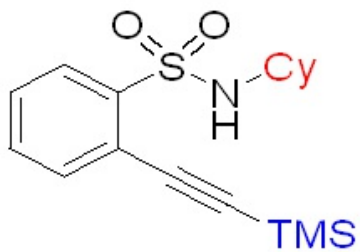

**3c**

CDCl<sub>3</sub>, 400 MHz

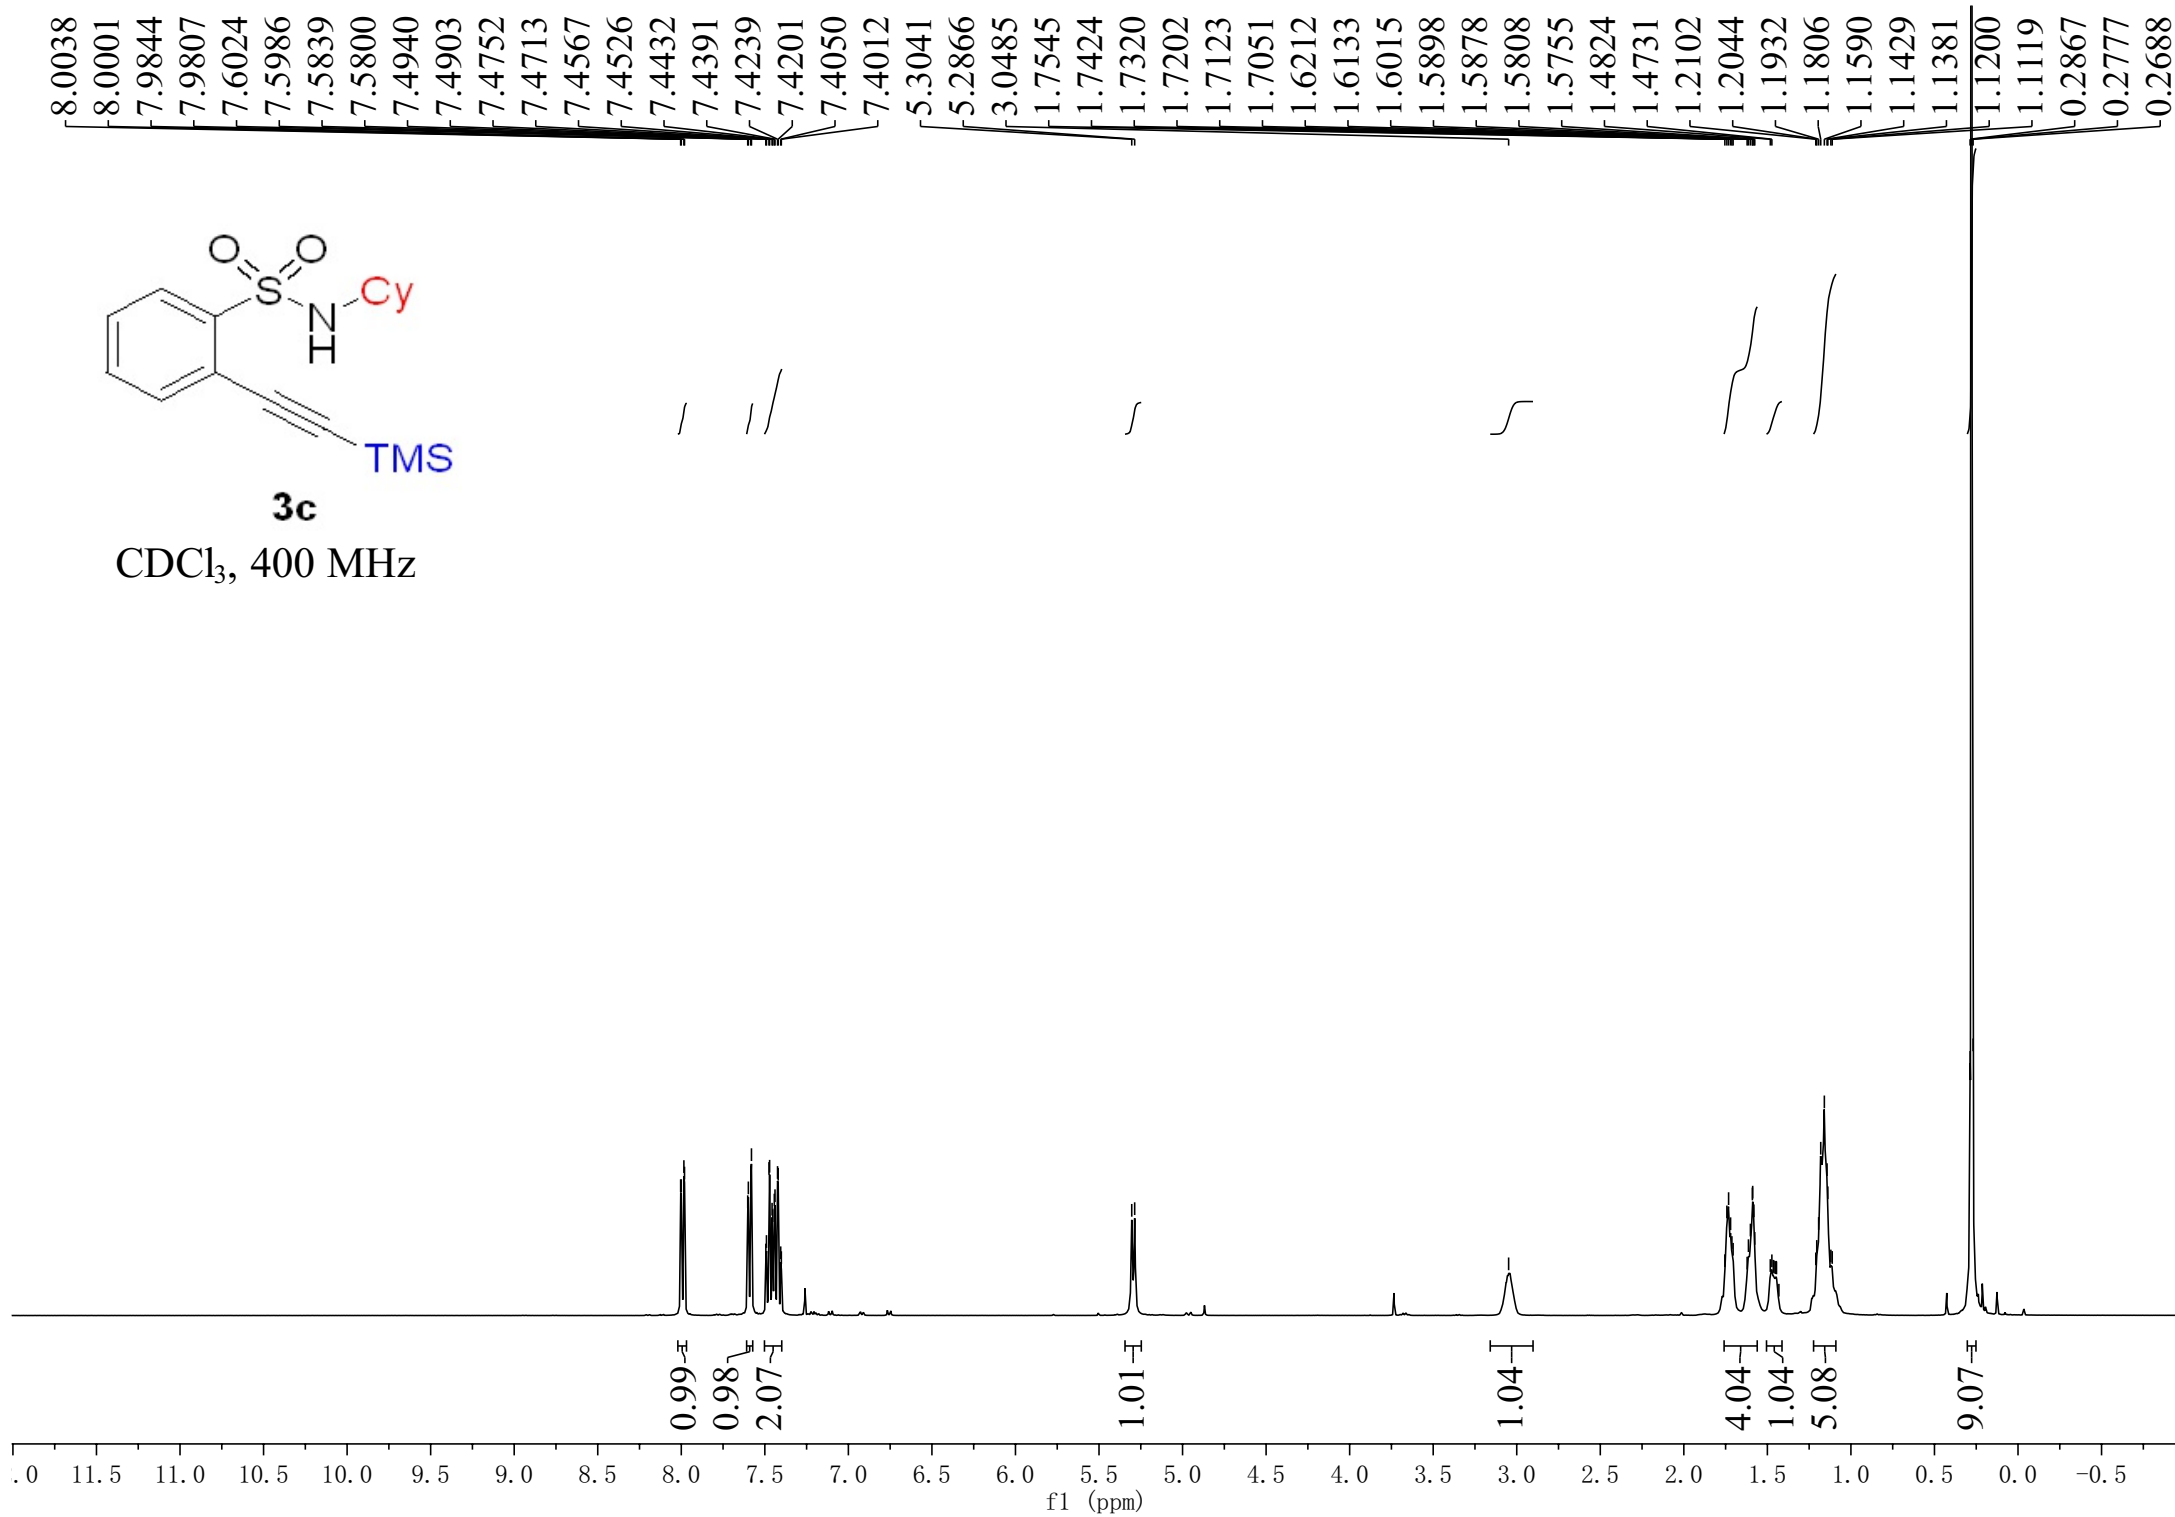

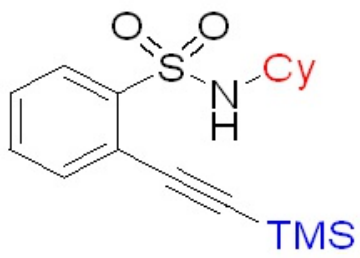

**3c**

CDCl<sub>3</sub>, 101 MHz

- ~142.75
- ~134.36
- ~131.73
- ~128.66
- ~128.29
- ~119.91
- ~103.84
- ~101.80
- 77.32
- 77.00
- 76.68
- 52.71
- 33.46
- 25.02
- 24.28
- 0.48

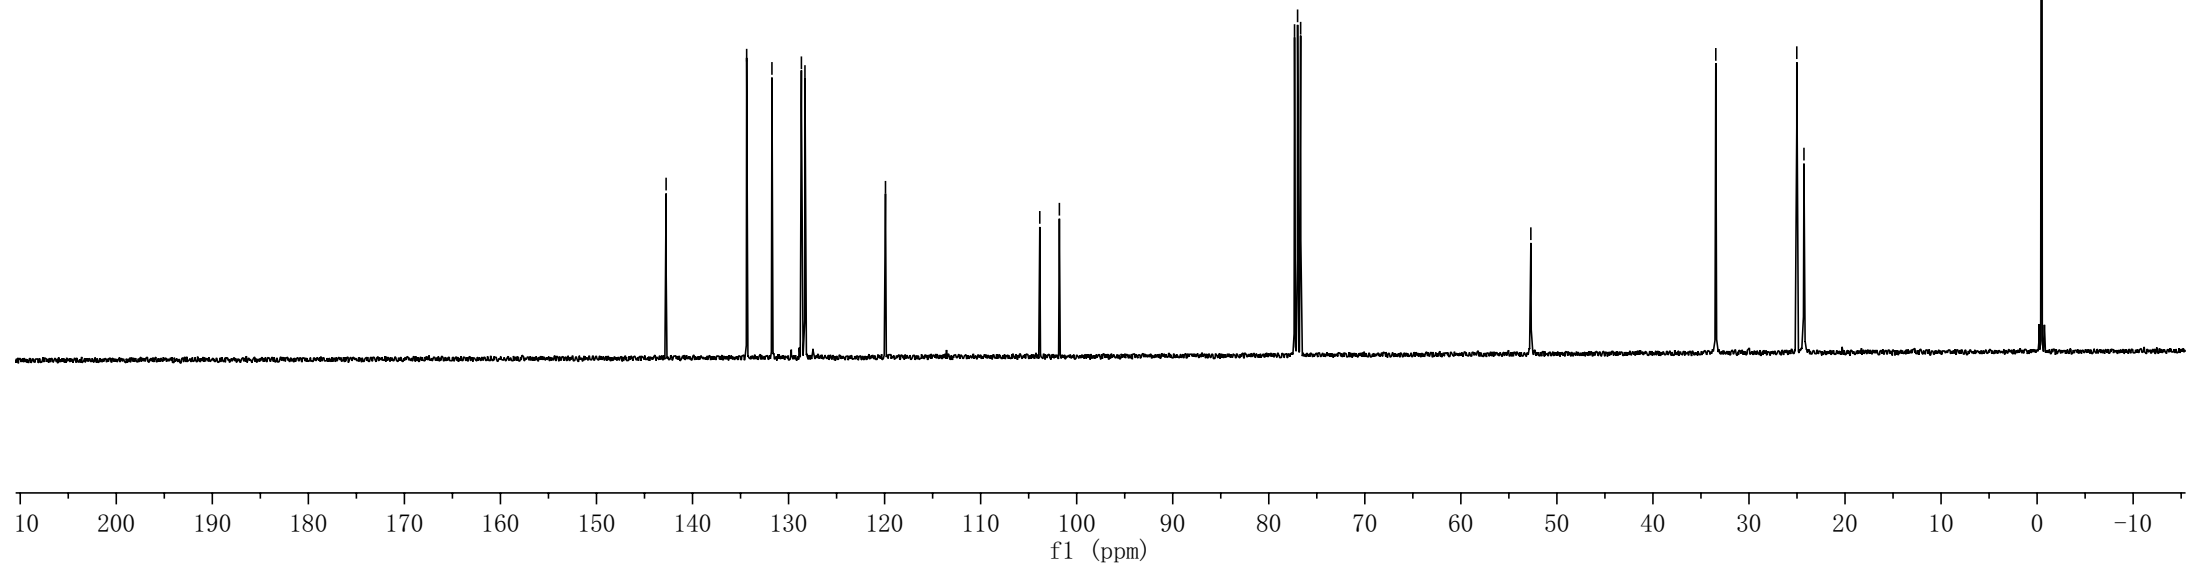

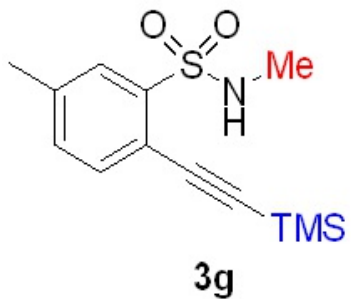

CDCl<sub>3</sub>, 400 MHz

7.8240  
7.8039  
7.3925  
7.3879  
7.2170  
7.2148  
7.2123  
7.2103  
7.1967  
7.1948  
7.1922  
7.1902

5.1712  
5.1575  
5.1438  
5.1302

2.5269  
2.5133  
2.3238

0.2319

/ /

/

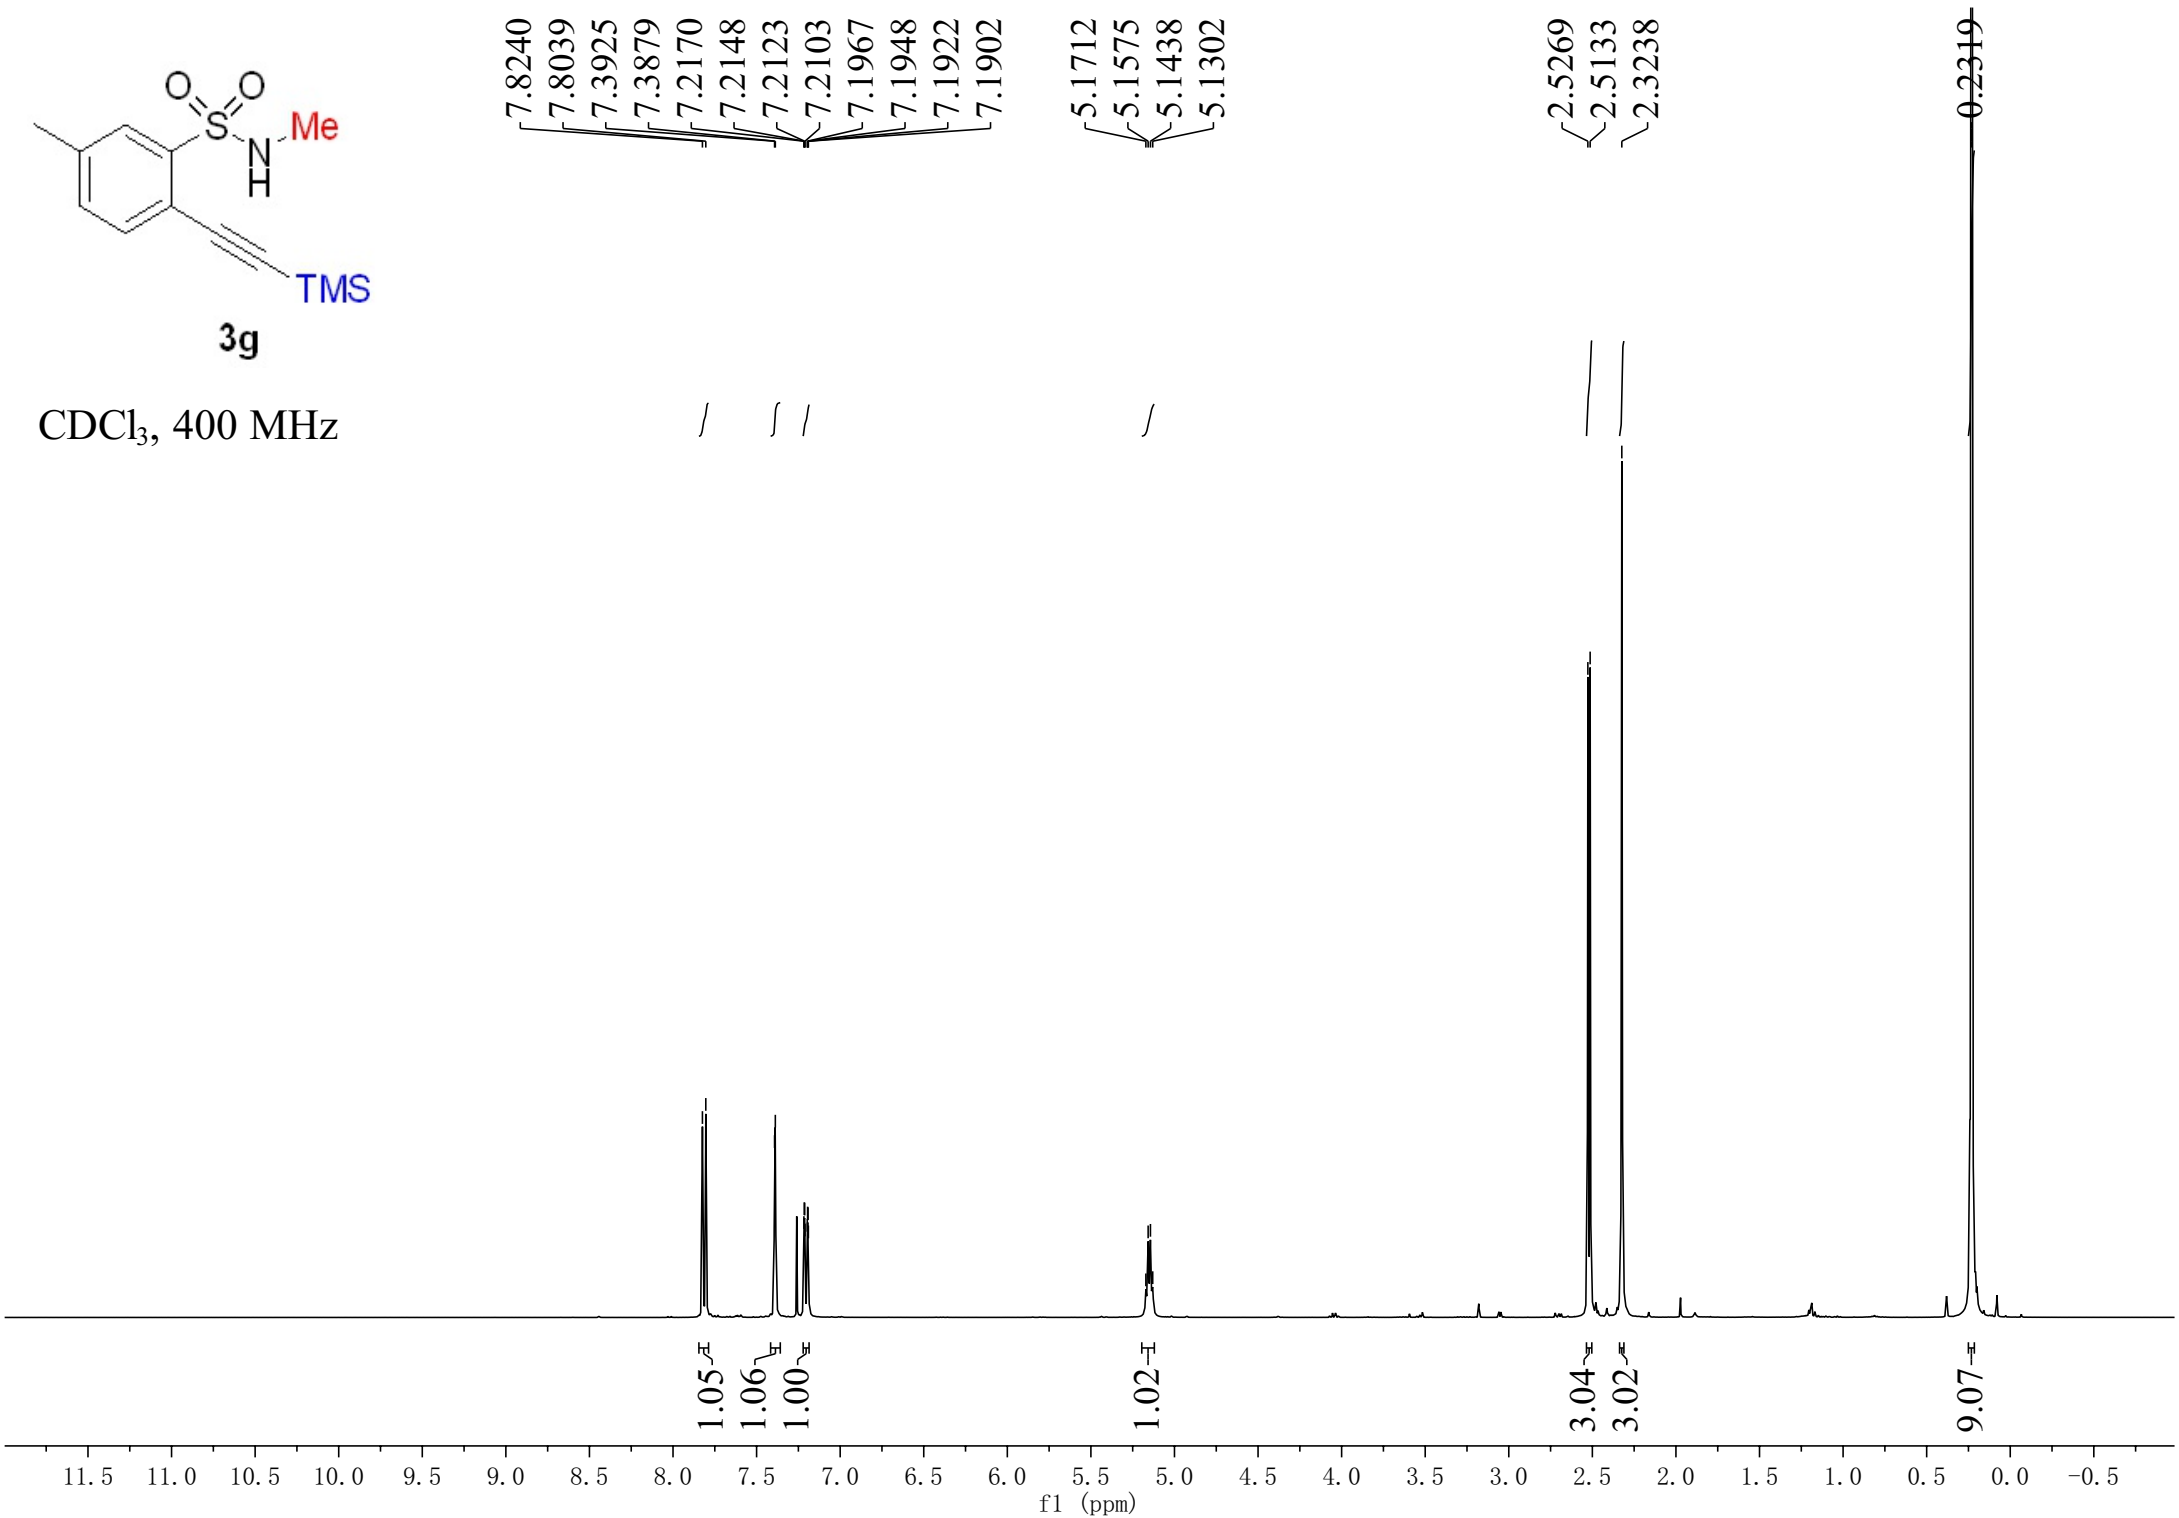

1.05

1.06

1.00

1.02

3.04

3.02

9.07

f1 (ppm)

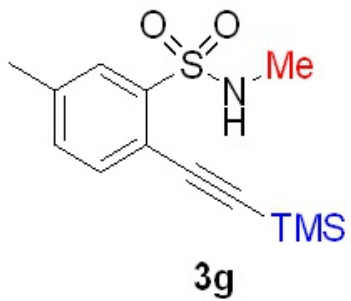

CDCl<sub>3</sub>, 101 MHz

142.77  
136.86  
134.80  
129.35  
129.29  
-119.68

102.76  
101.24

77.32  
77.00  
76.68

-29.20  
-20.86

-0.67

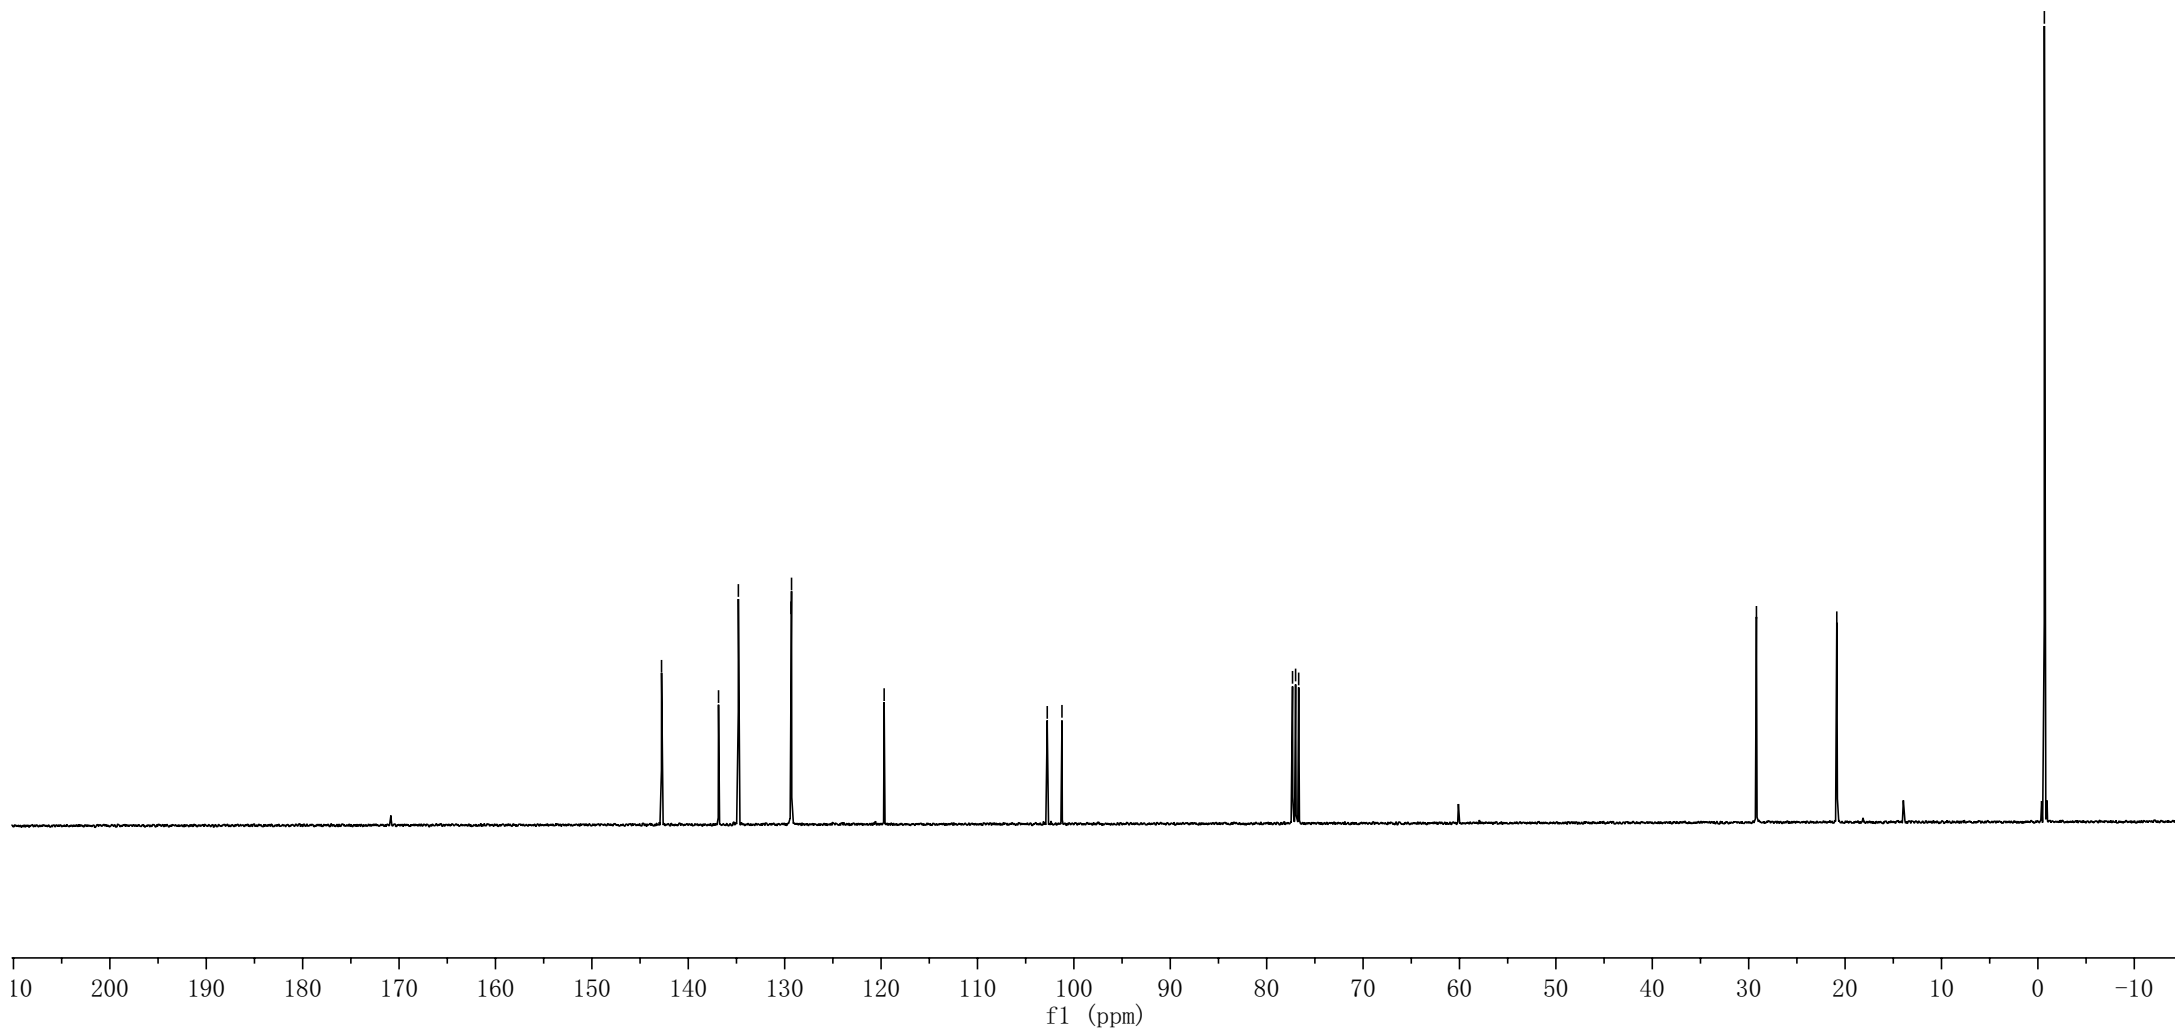

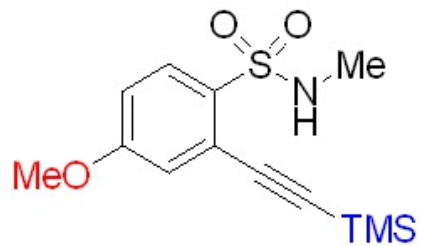

3h

CDCl<sub>3</sub>, 400 MHz

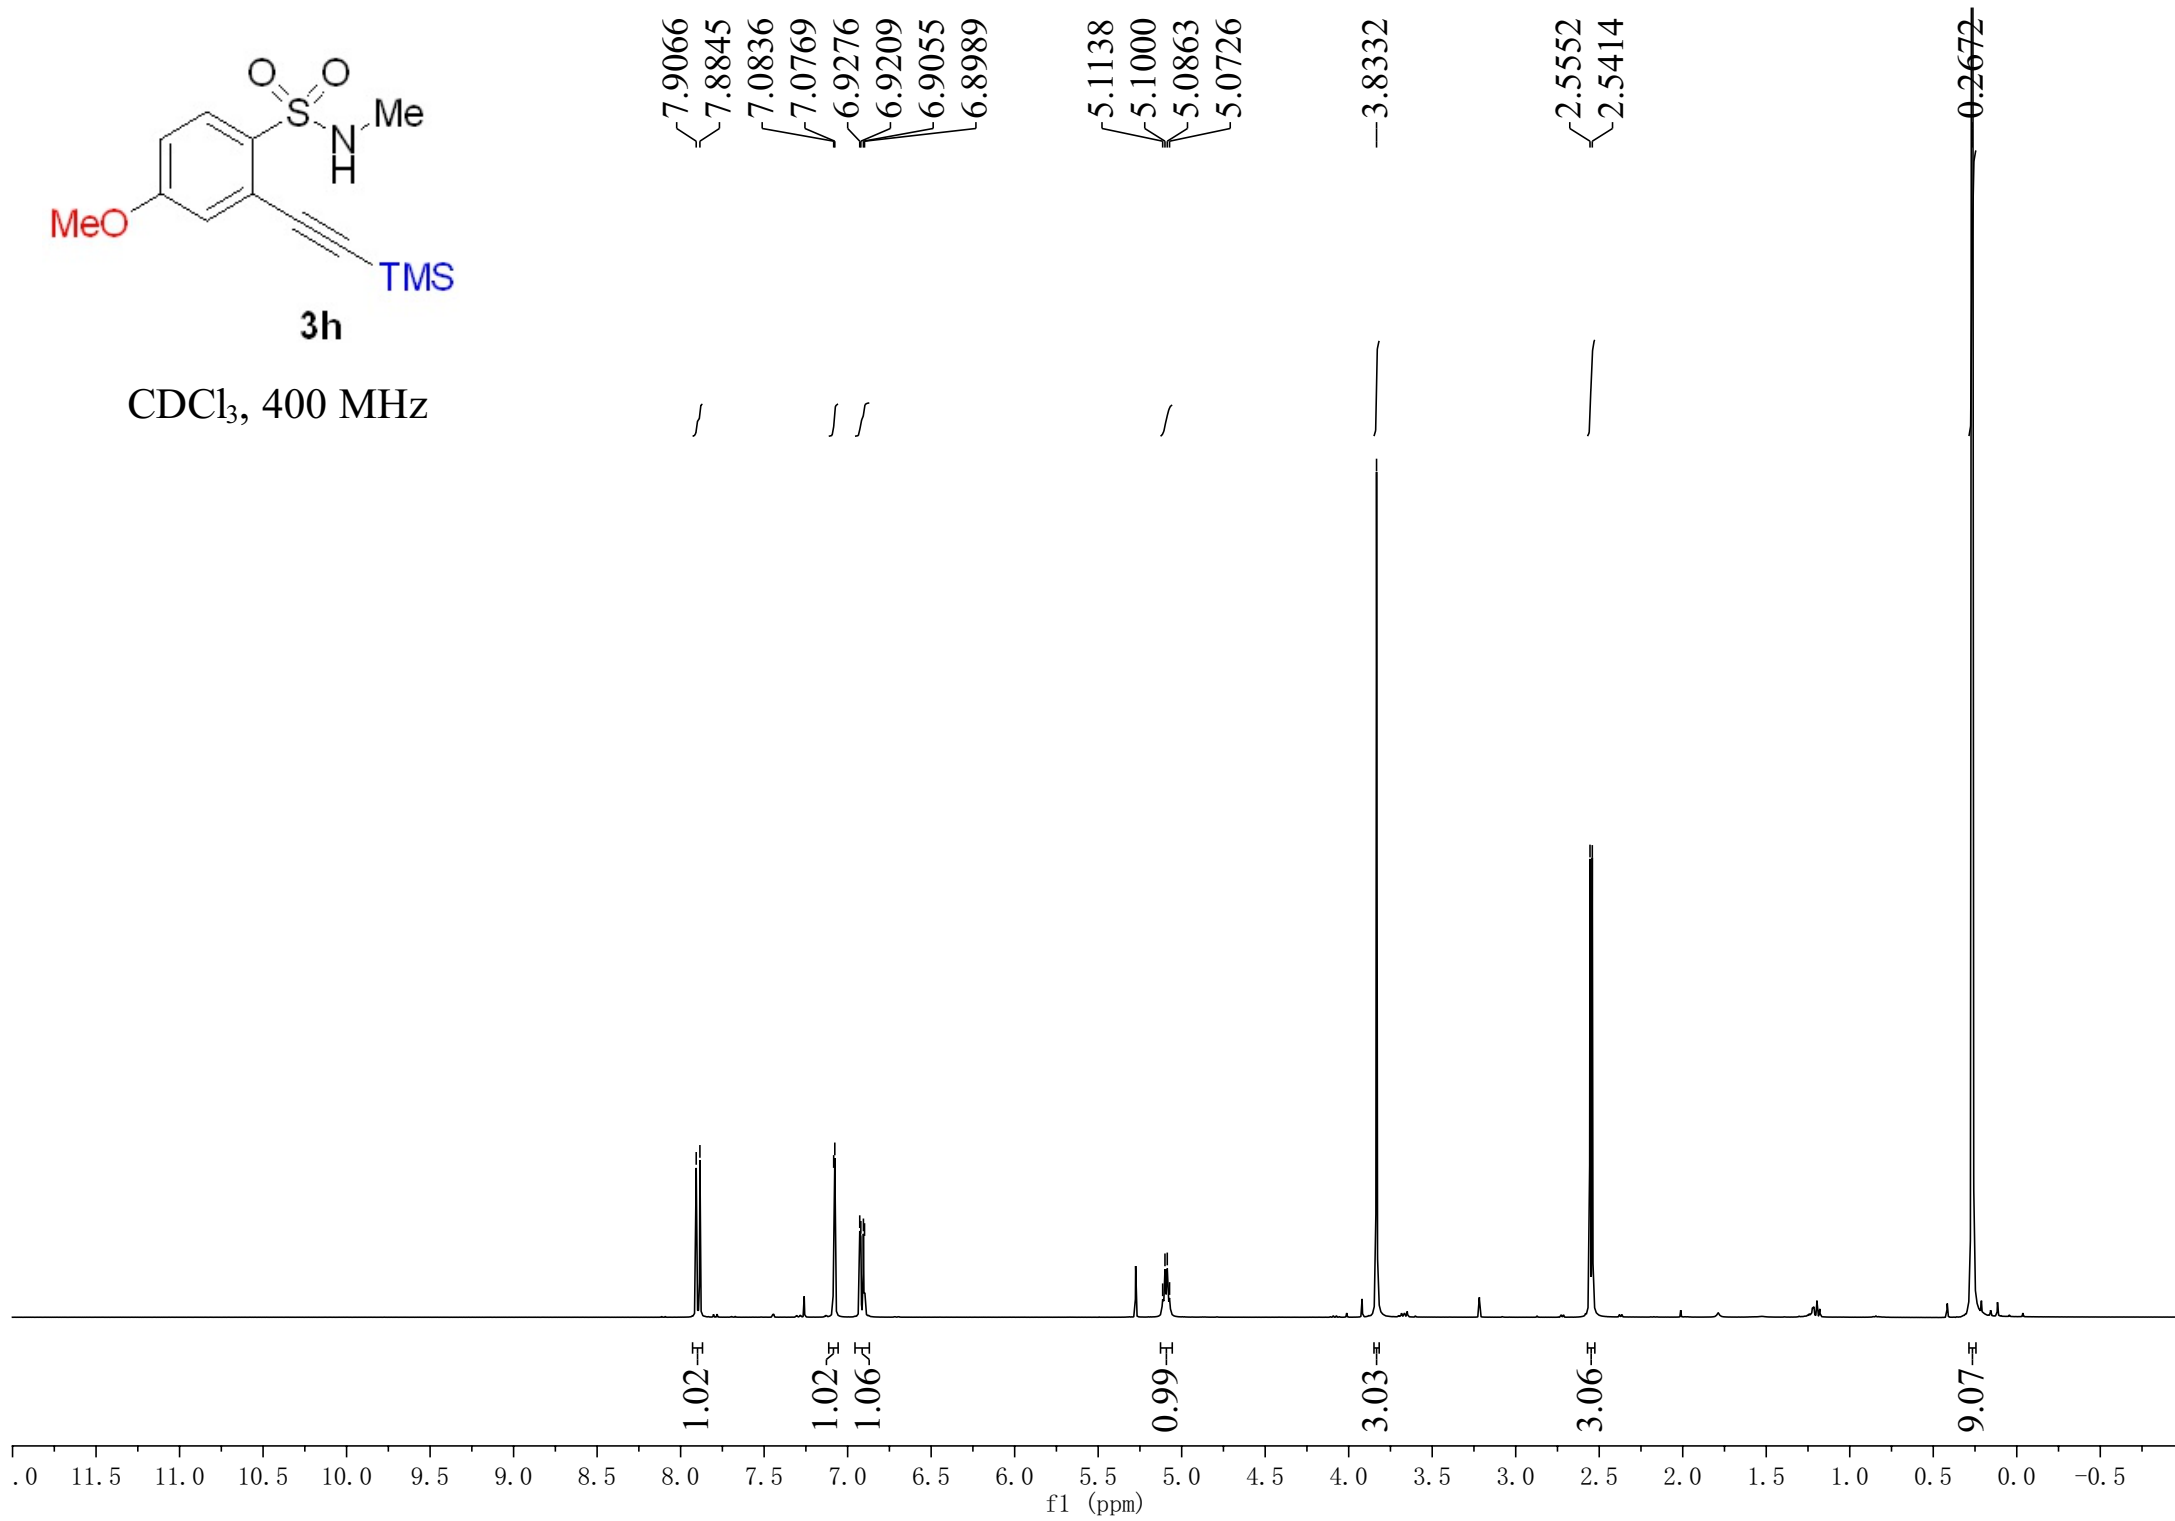



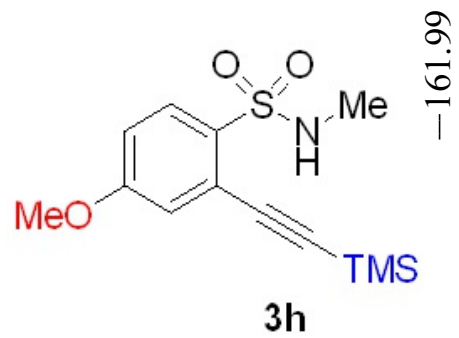

CDCl<sub>3</sub>, 101 MHz

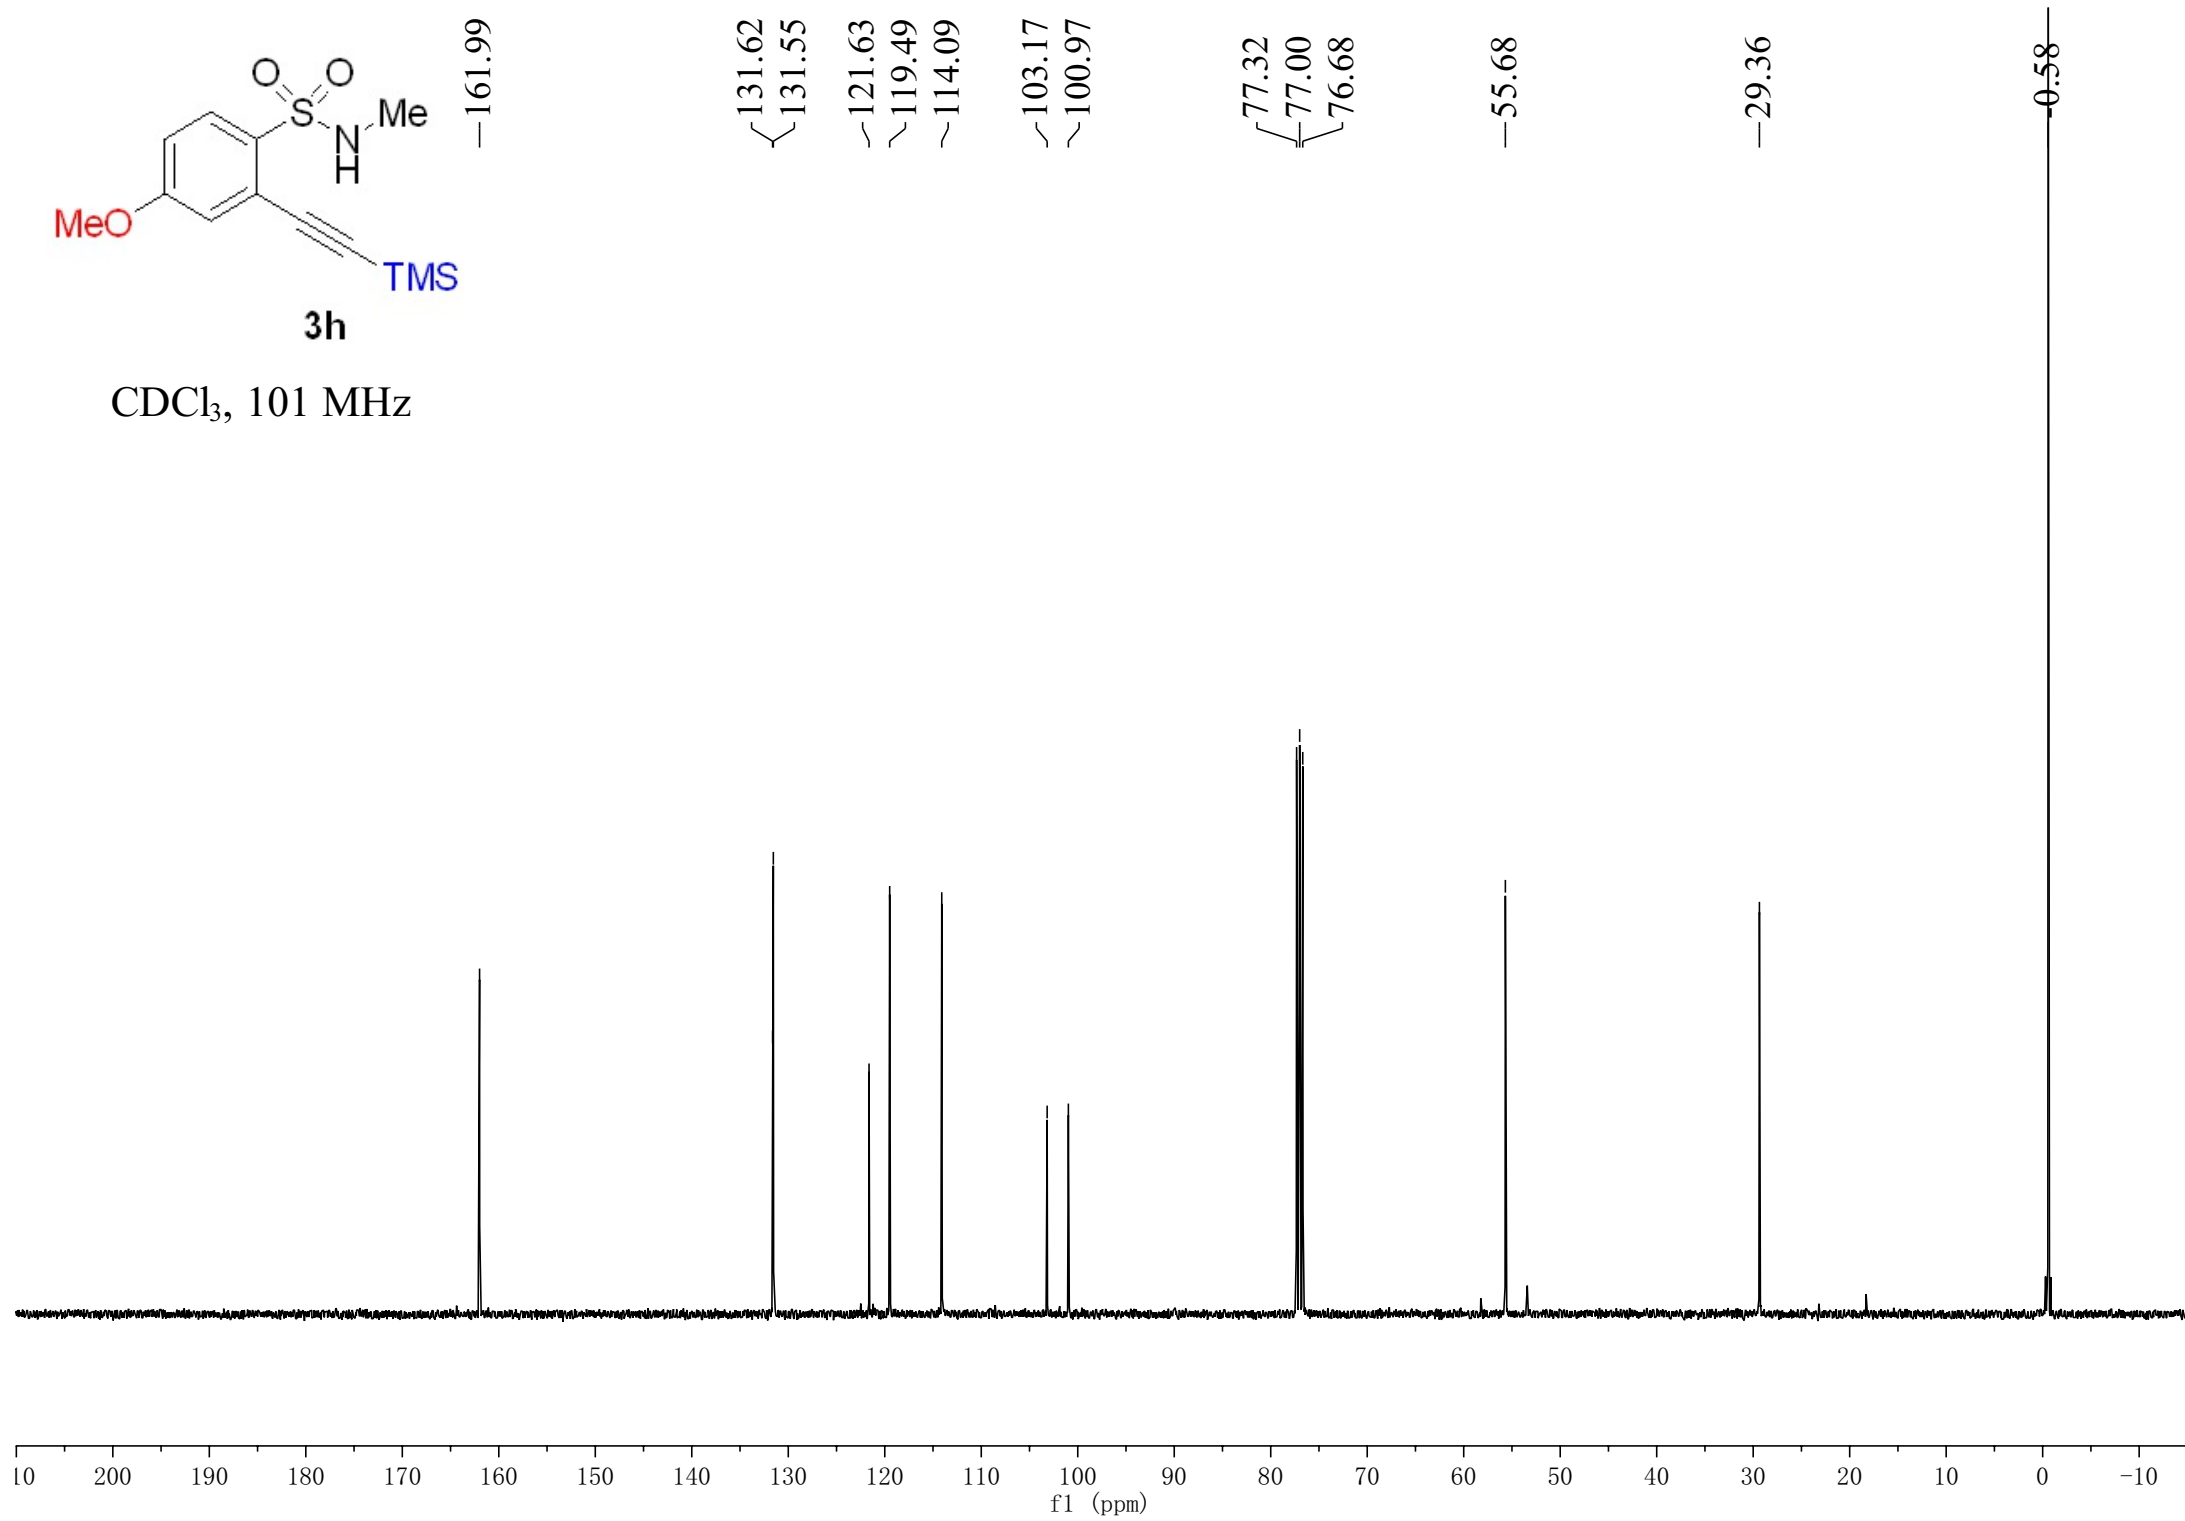

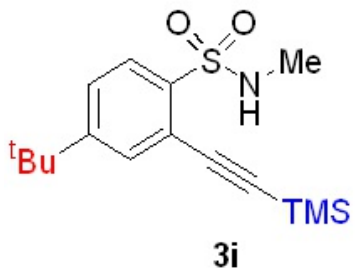

CDCl<sub>3</sub>, 400 MHz

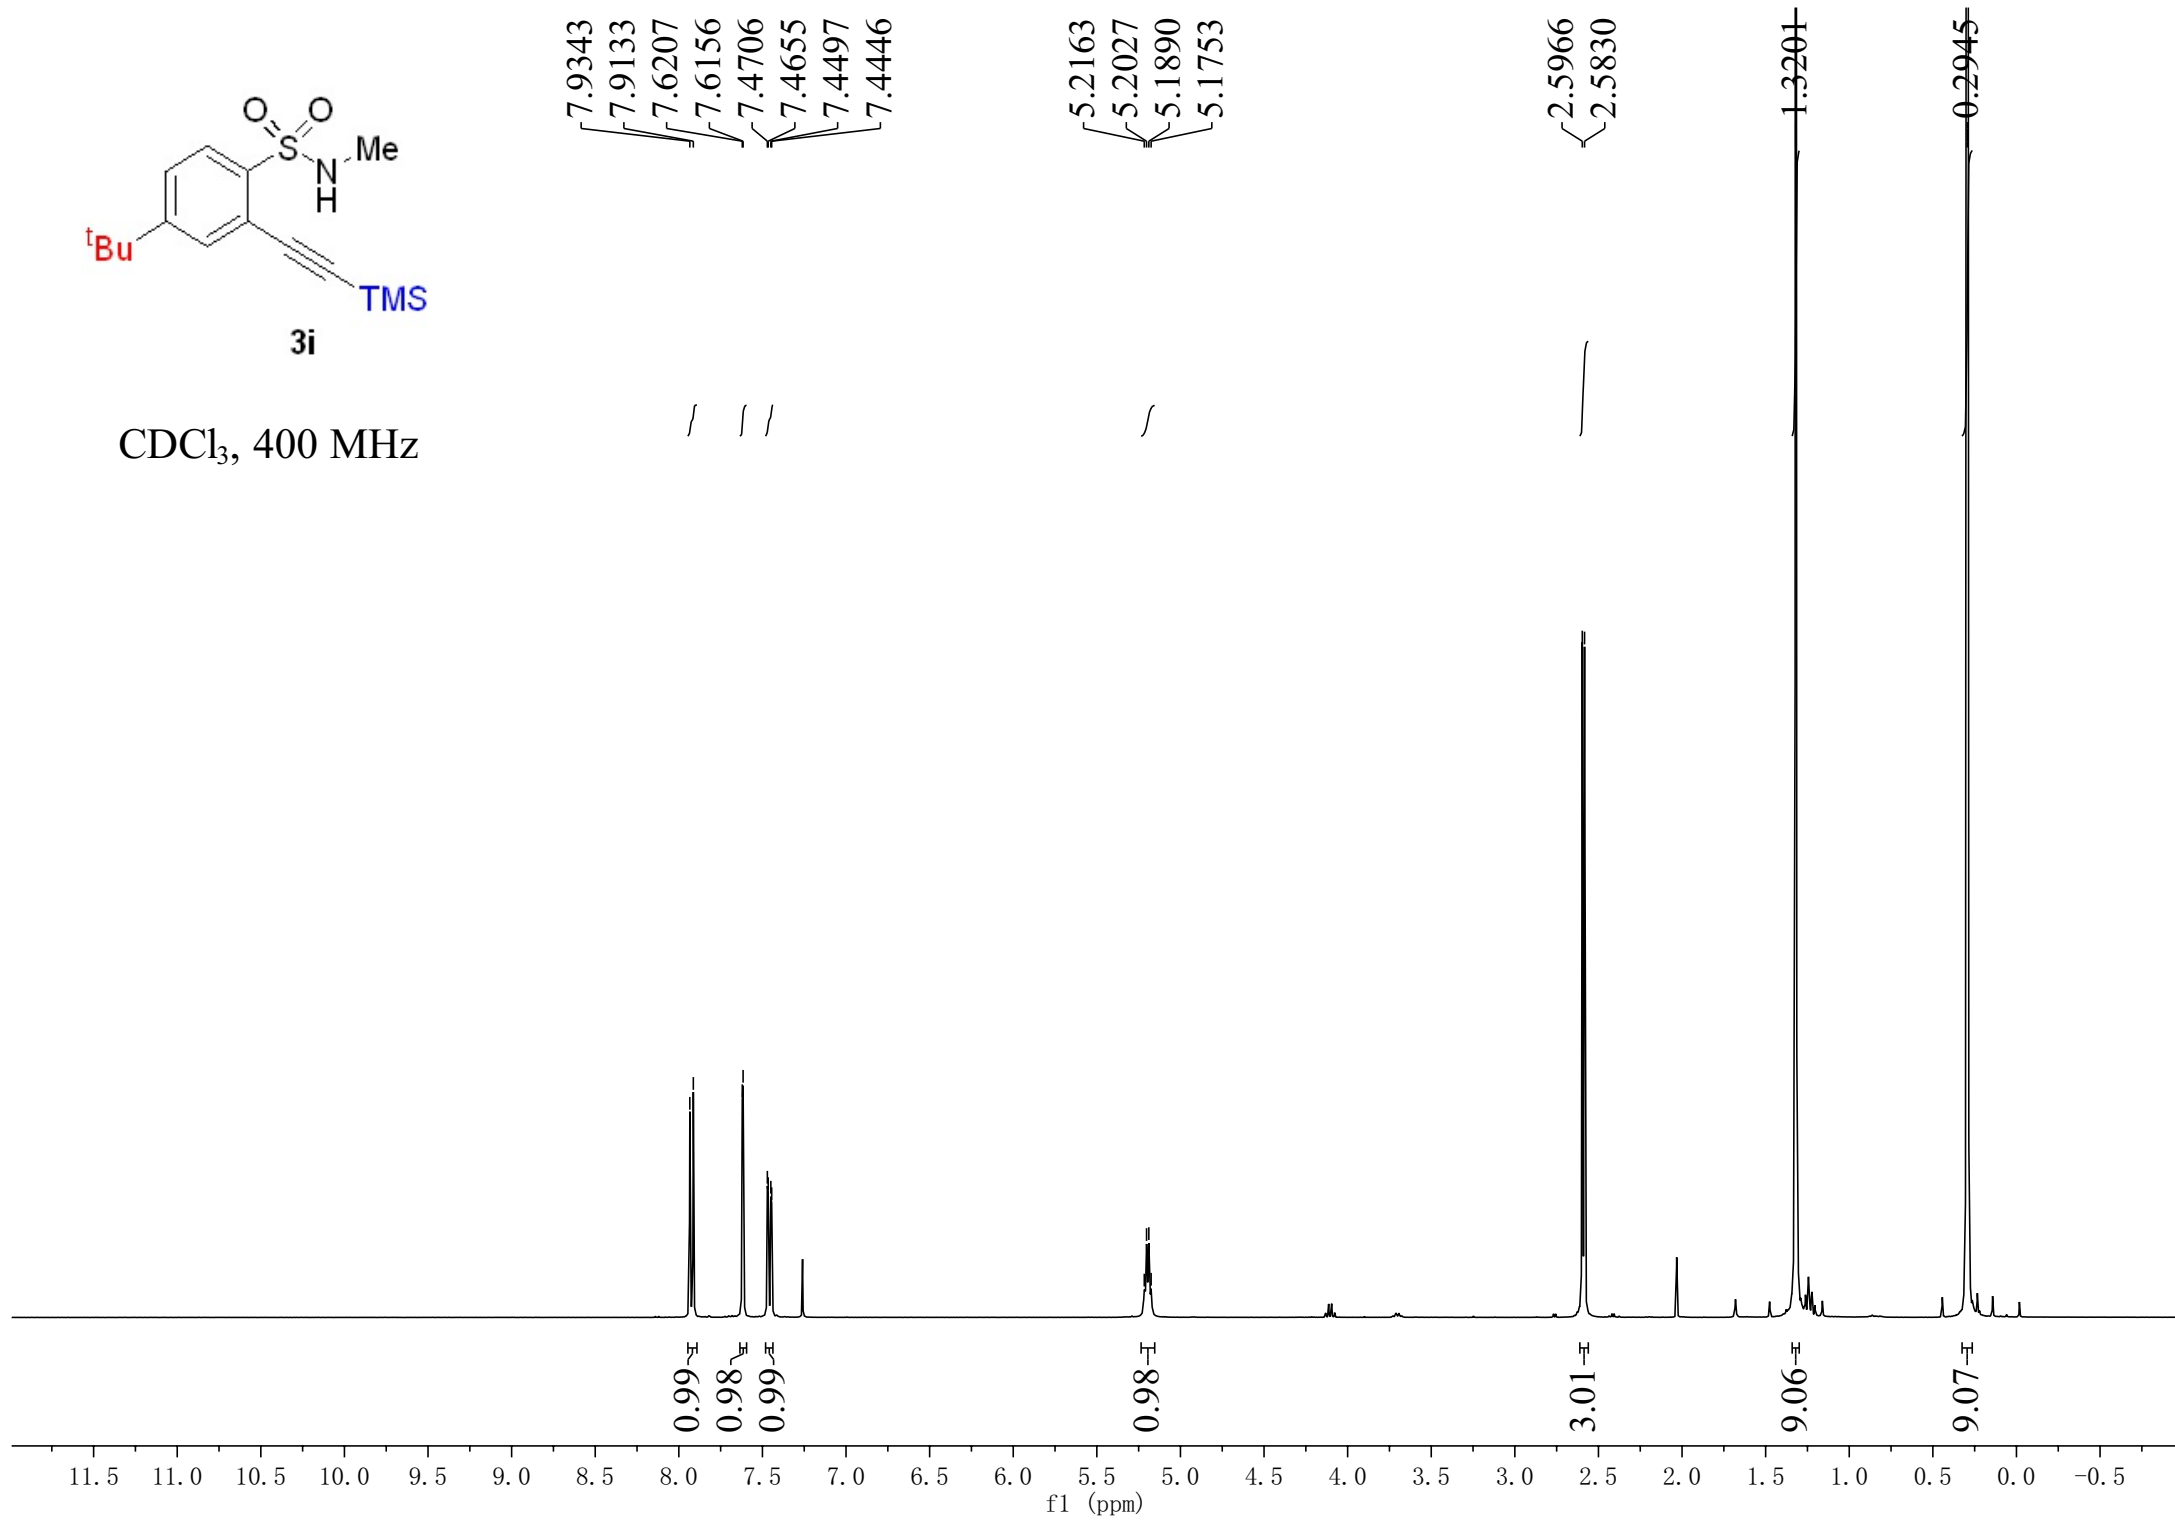



CDCl<sub>3</sub>, 101 MHz

-155.86

-137.02

-131.65

-129.42

-125.98

-119.59

-102.62

-101.81

77.32

77.00

76.68

34.97

30.86

29.43

-0.45

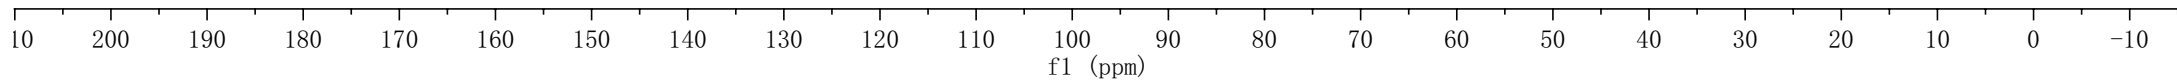

8.0912  
8.0706  
7.8547  
7.8500  
7.6733  
7.6686  
7.6528  
7.6480  
7.6092  
7.6050  
7.5998  
7.5918  
7.5878  
7.5850  
7.5010  
7.4970  
7.4802  
7.4752  
7.4646  
7.4607  
7.4464  
7.4428  
7.4392  
7.4253  
5.2677  
5.2541  
5.2404  
5.2268

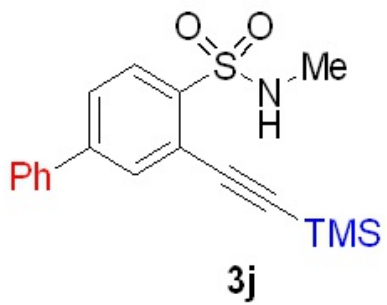

CDCl<sub>3</sub>, 400 MHz

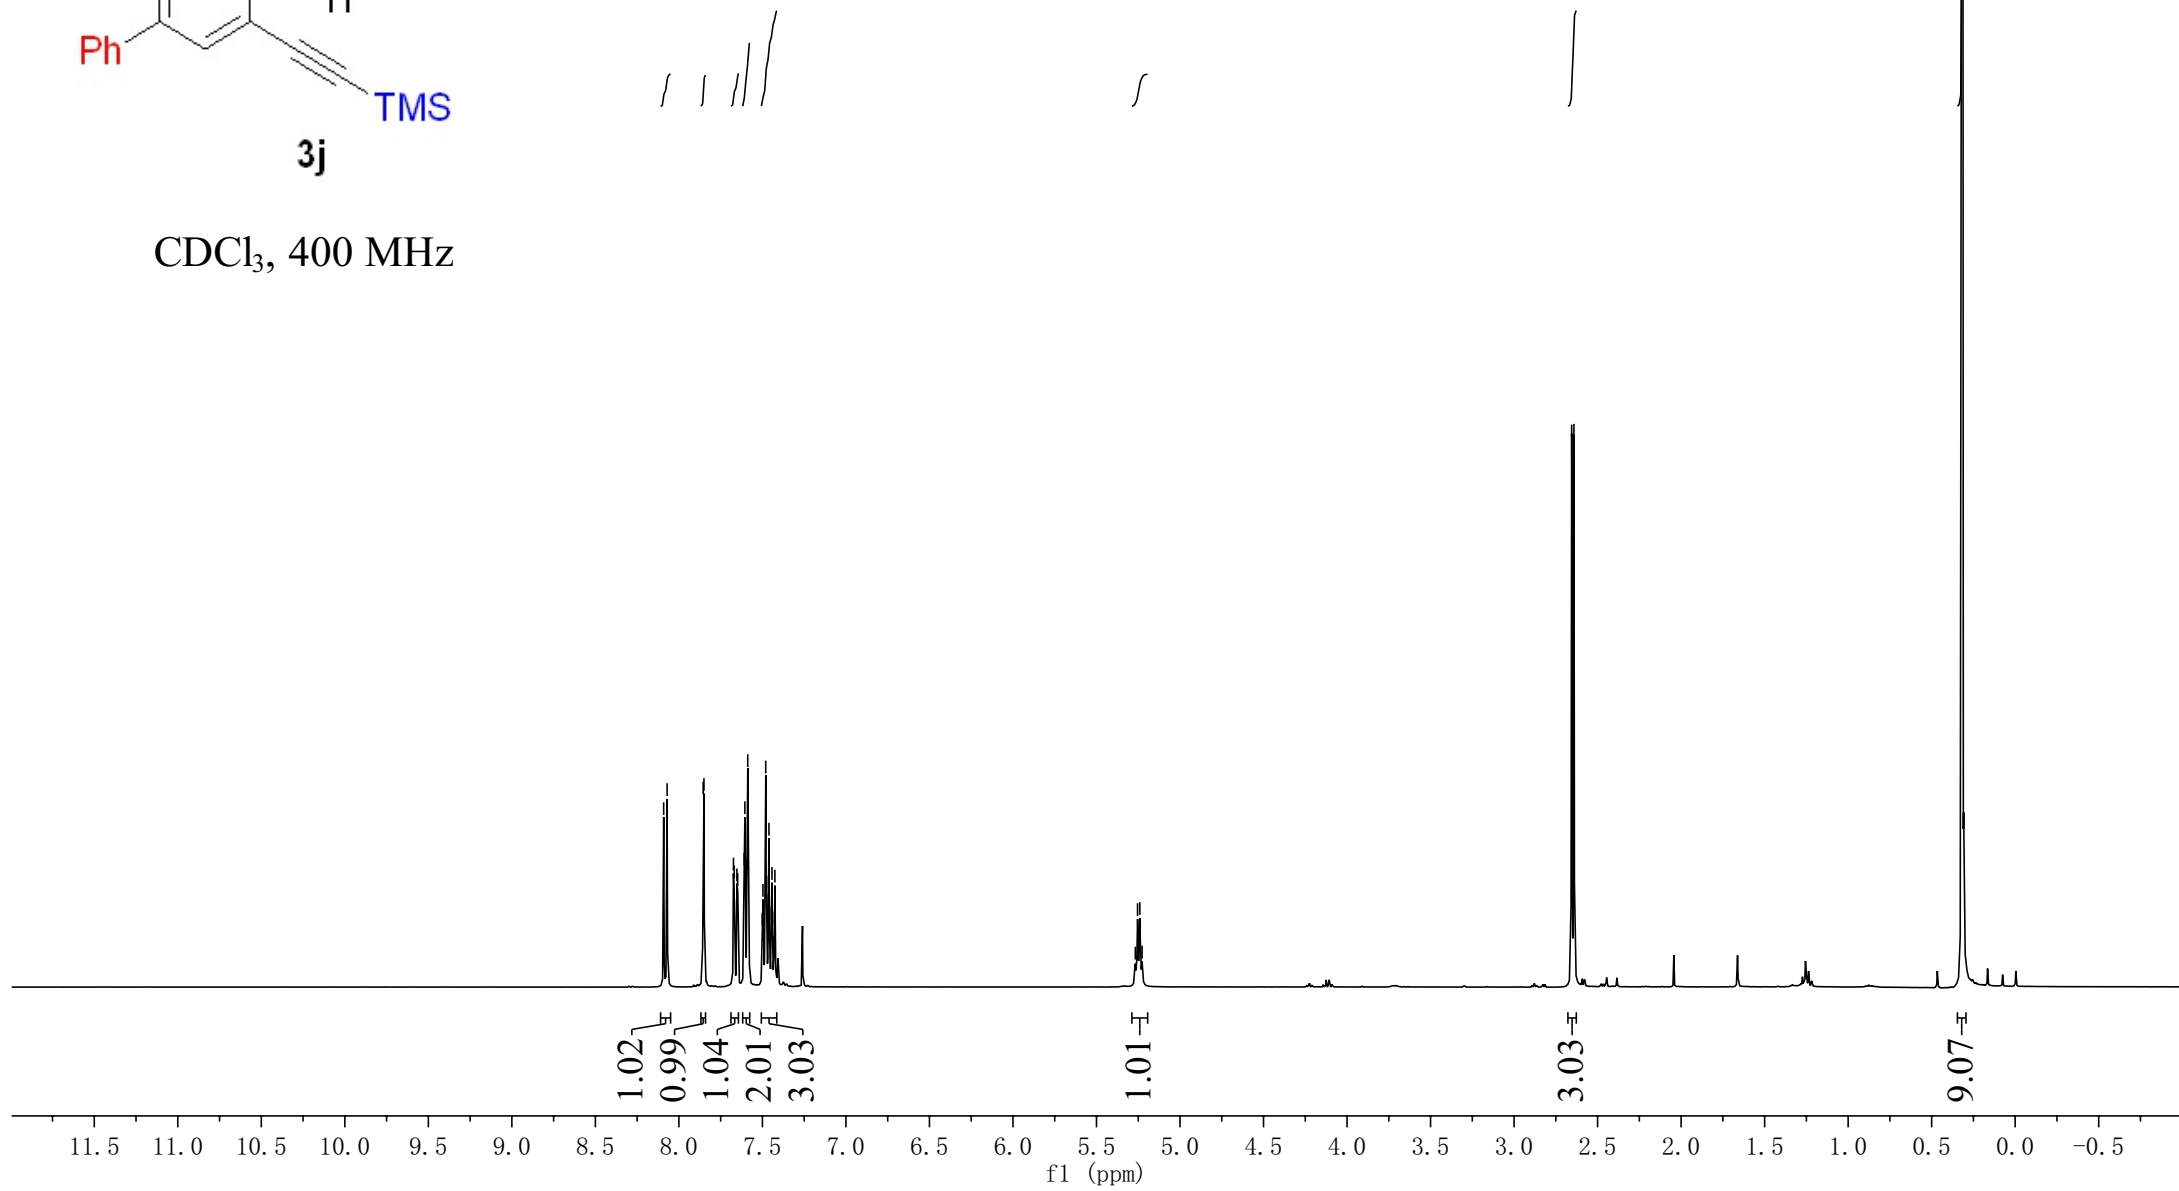

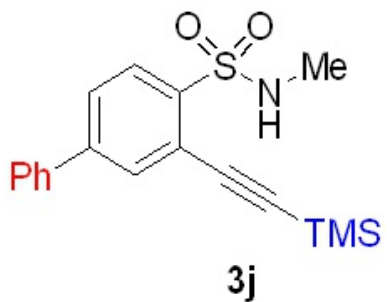

CDCl<sub>3</sub>, 101 MHz

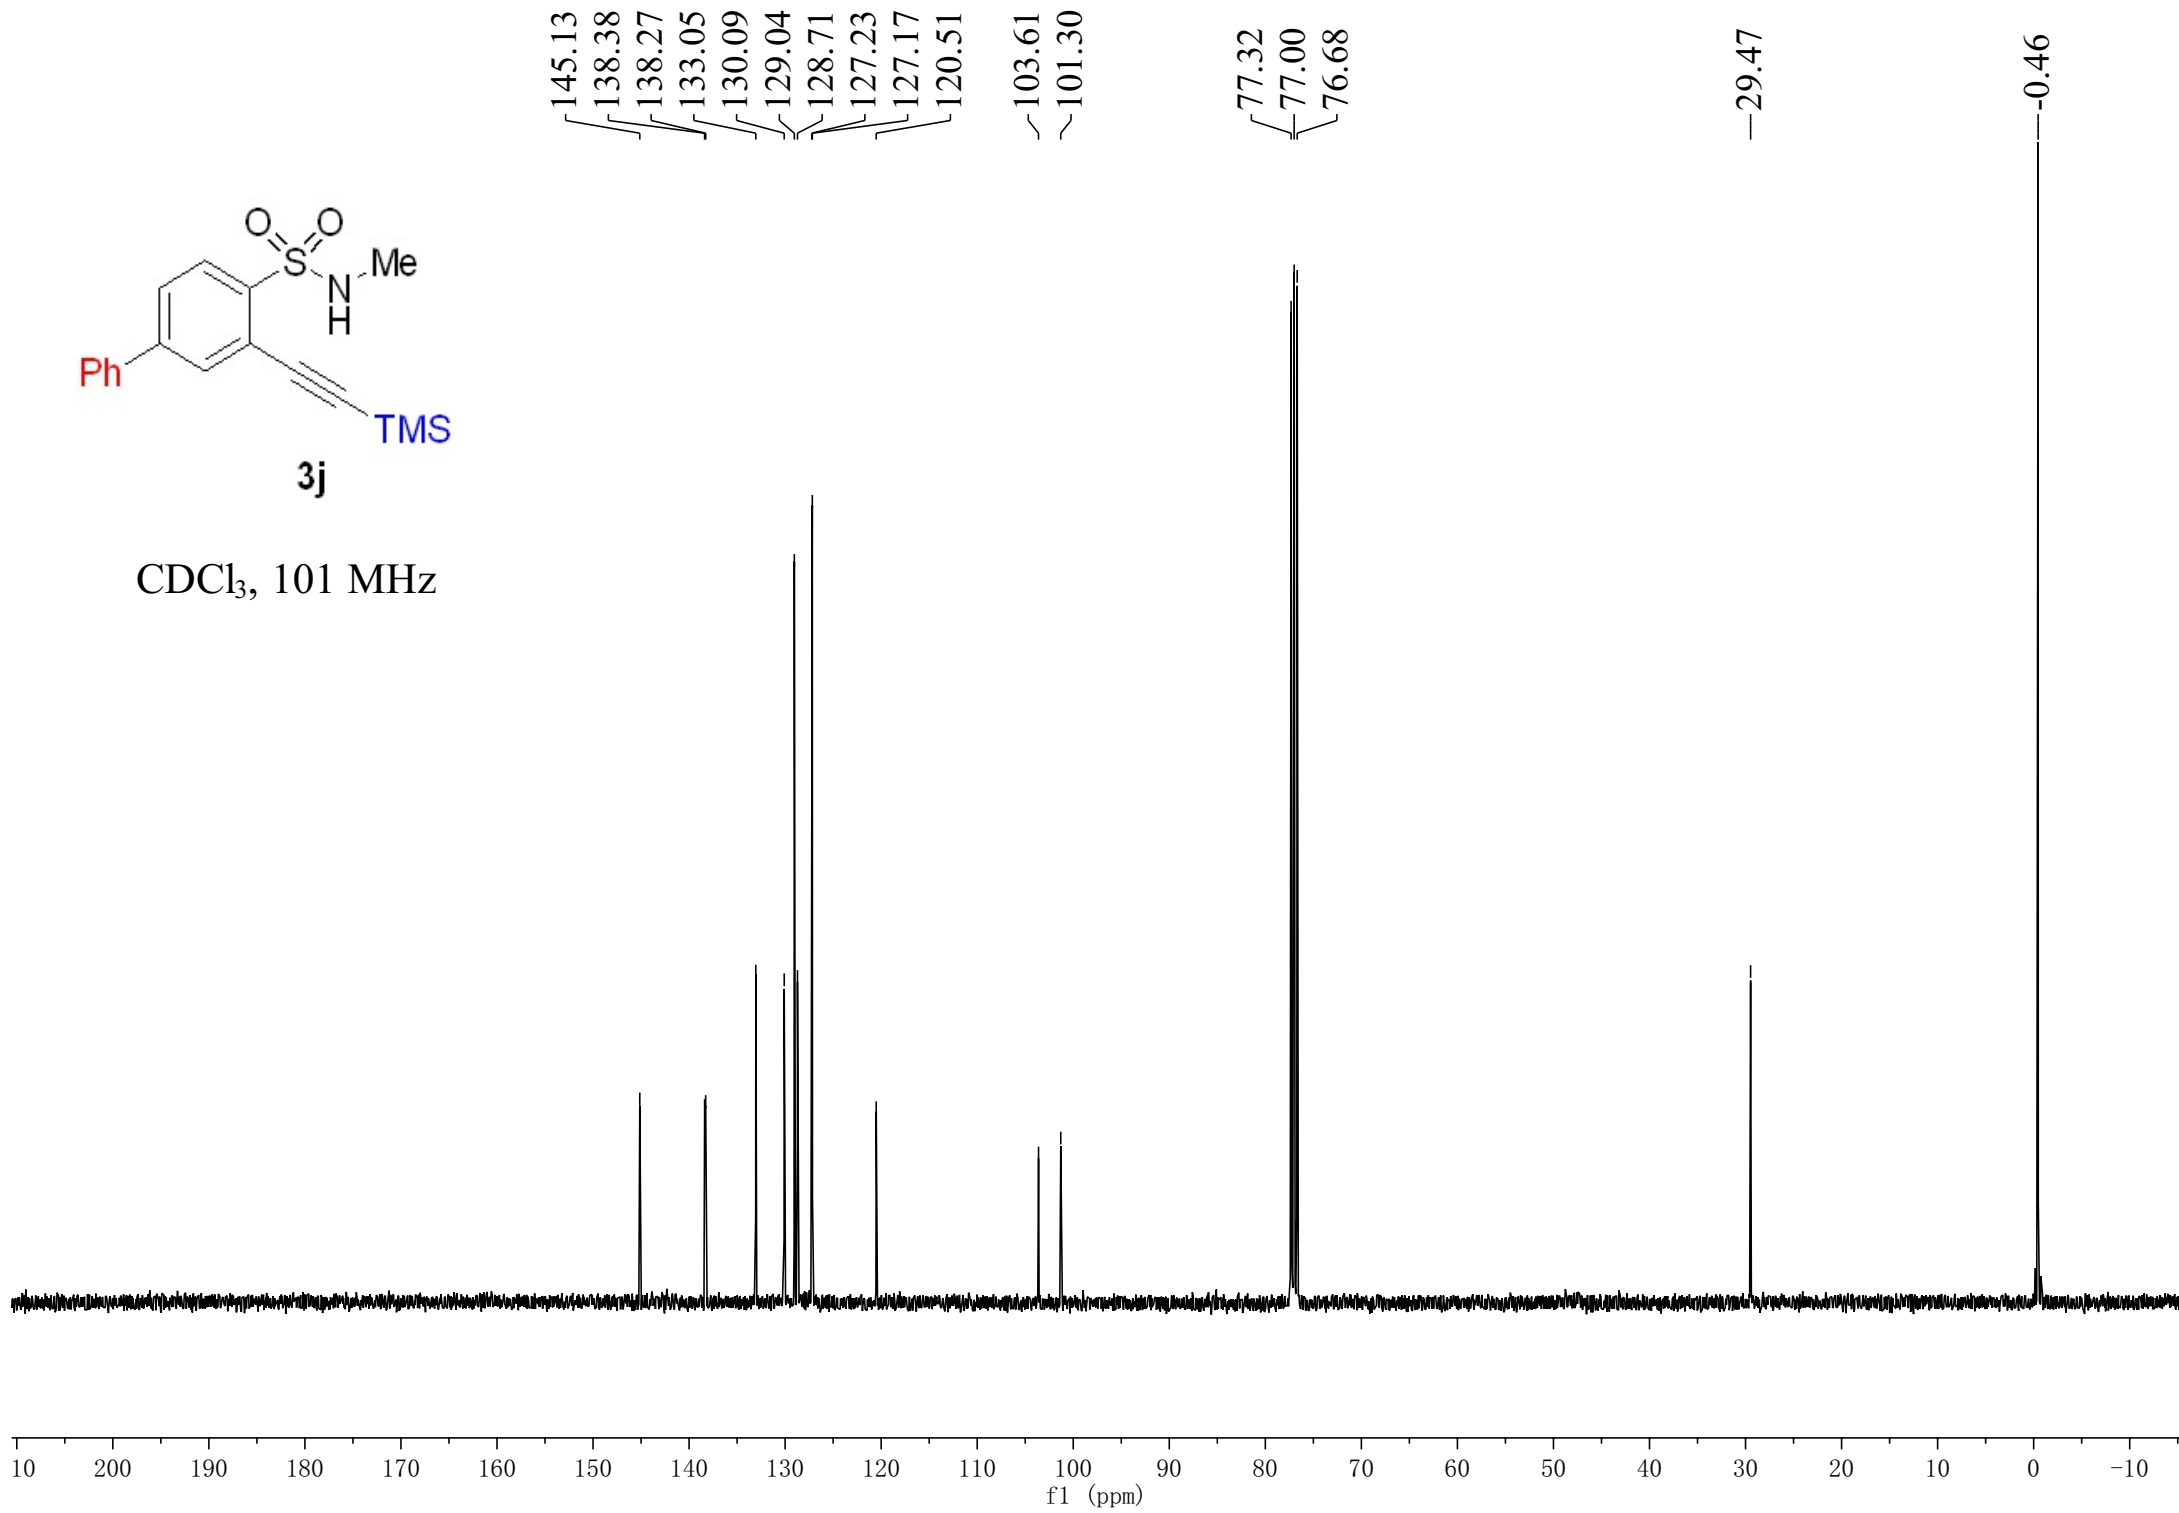

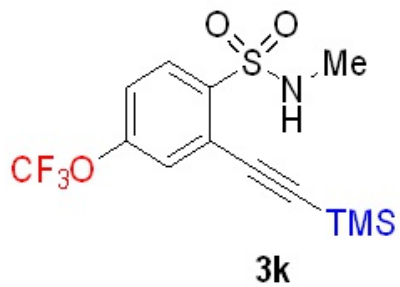

CDCl<sub>3</sub>, 400 MHz

8.0734  
8.0515  
7.4612  
7.4535  
7.4507  
7.4472  
7.4447  
7.4424  
7.4355  
7.3045  
7.3018  
7.2984  
7.2956  
7.2827  
7.2800  
7.2766  
7.2737  
7.2601  
5.1755  
5.1620  
5.1485  
5.1351  
2.6331  
2.6196  
0.3002

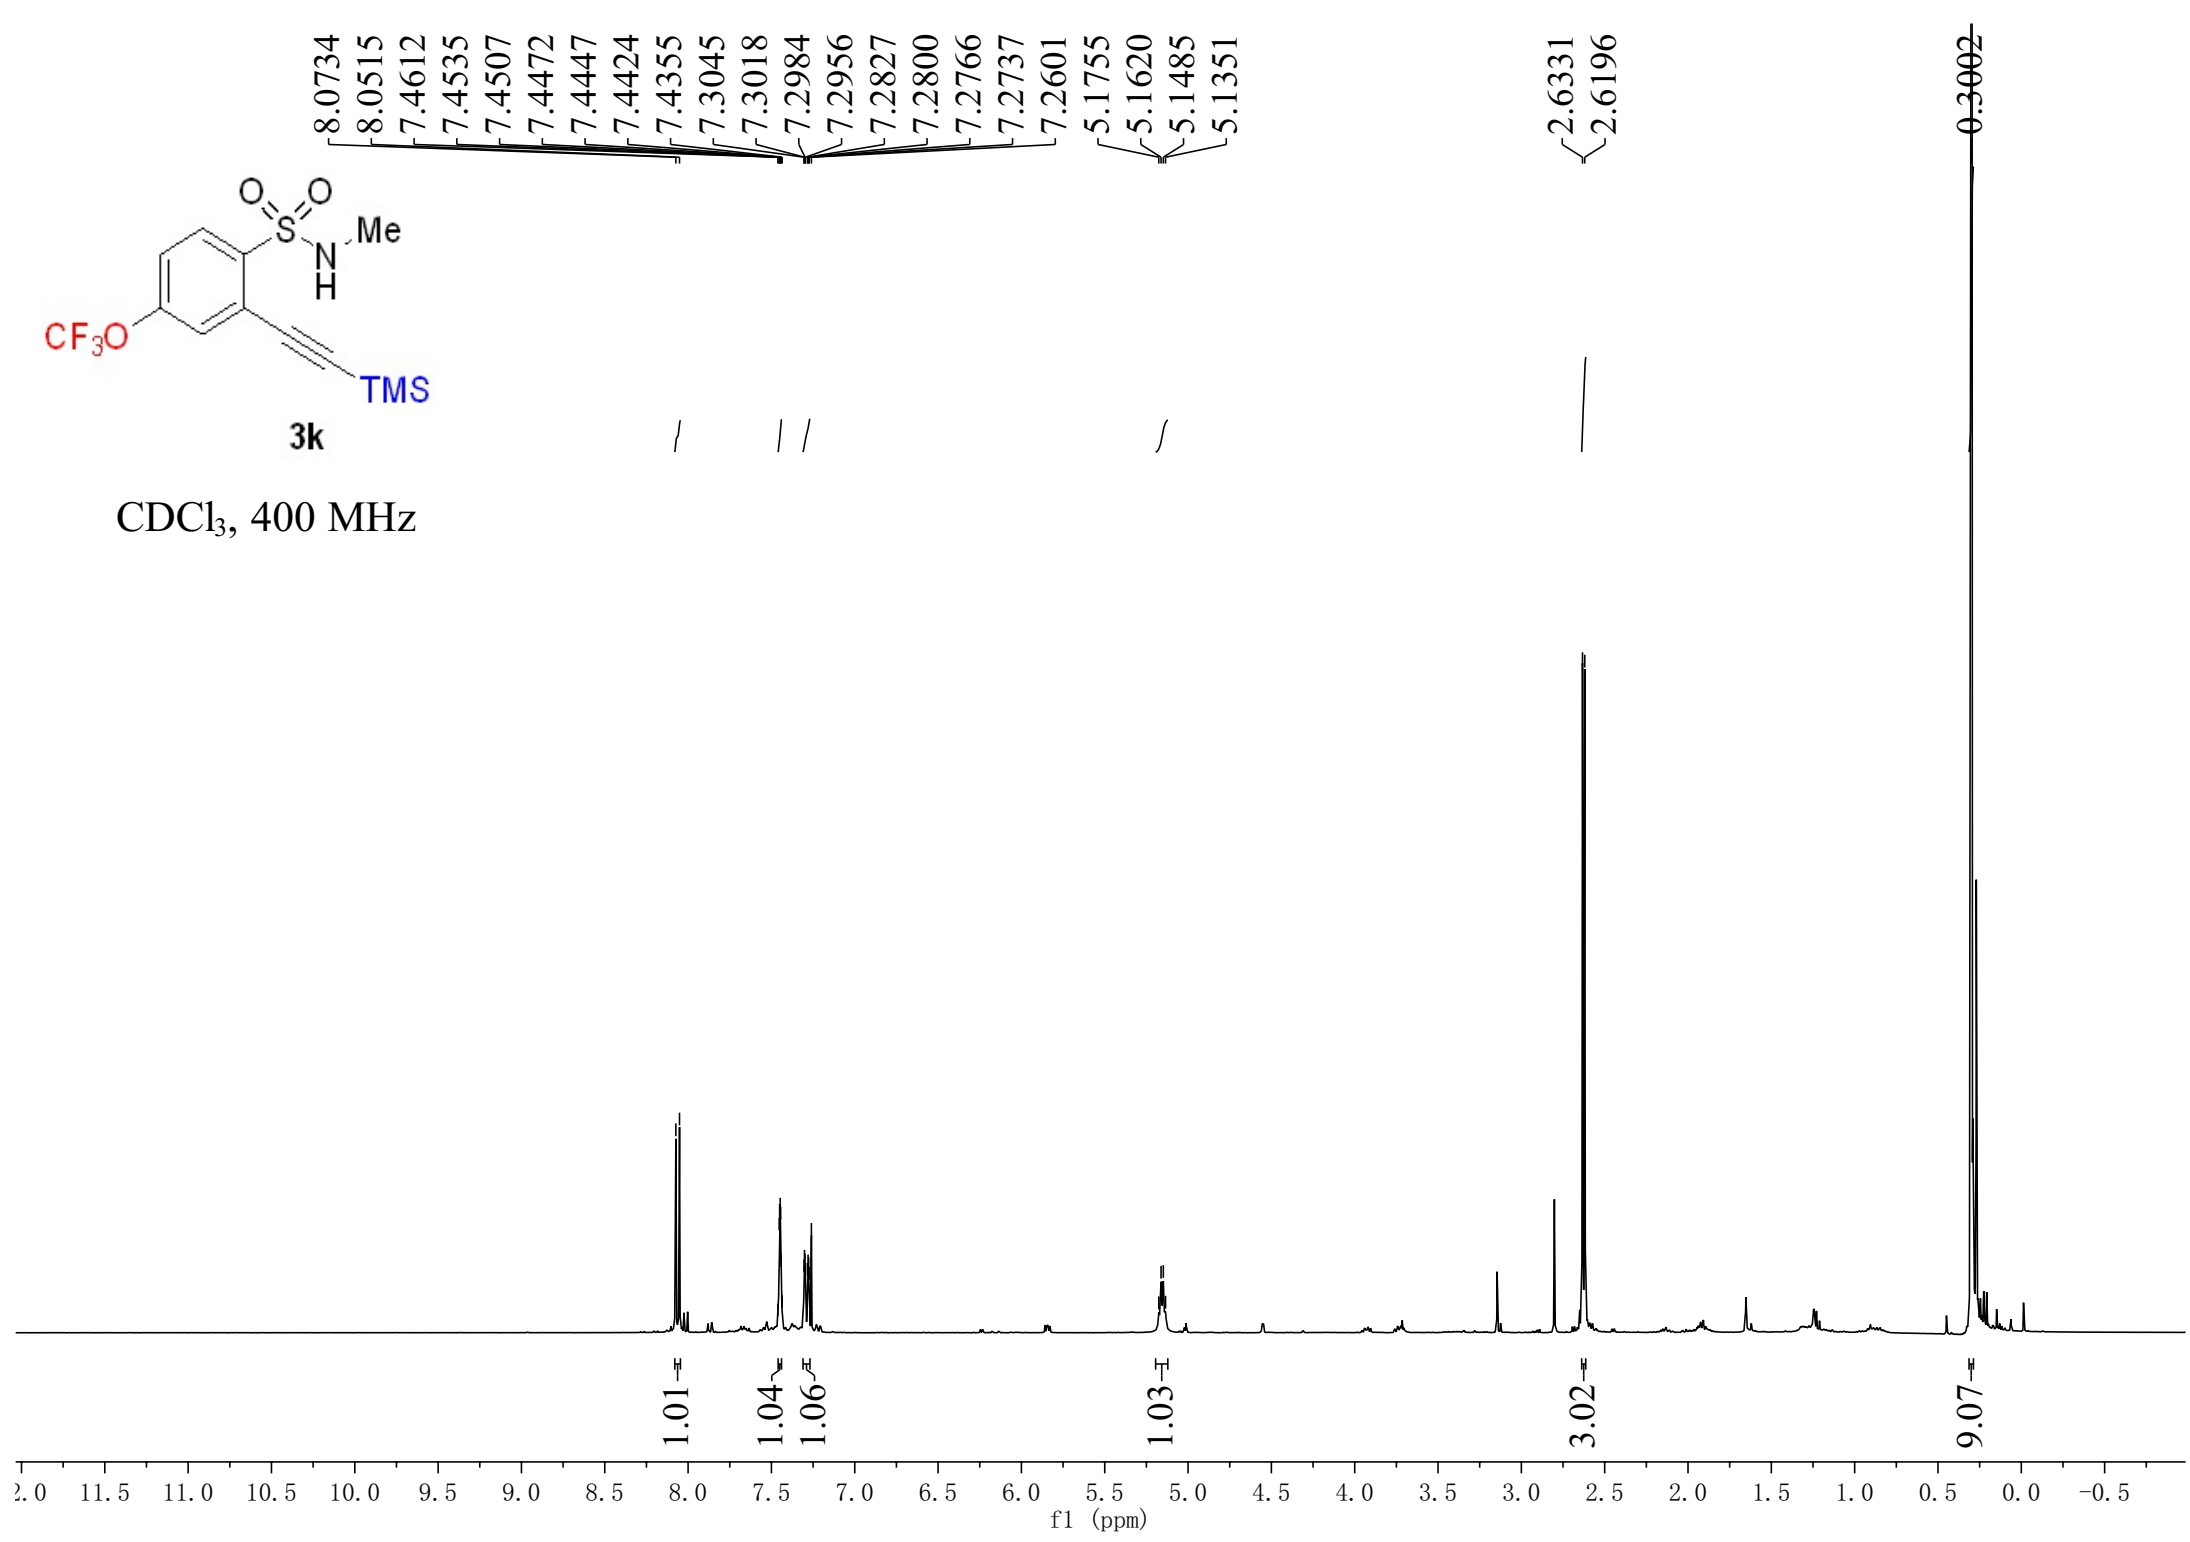

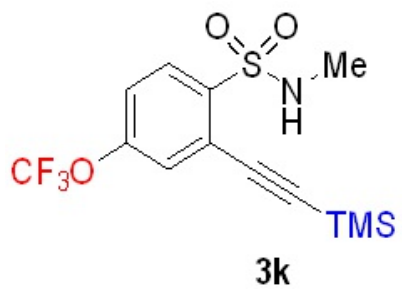

CDCl<sub>3</sub>, 101 MHz

—151.36  
/ 138.46  
/ 131.62  
/ 126.01  
/ 122.46  
/ 121.38  
~ 120.55  
\ 118.80  
  
—105.77  
—99.70  
  
/ 77.32  
/ 77.00  
/ 76.68  
  
—29.43  
  
—-0.62

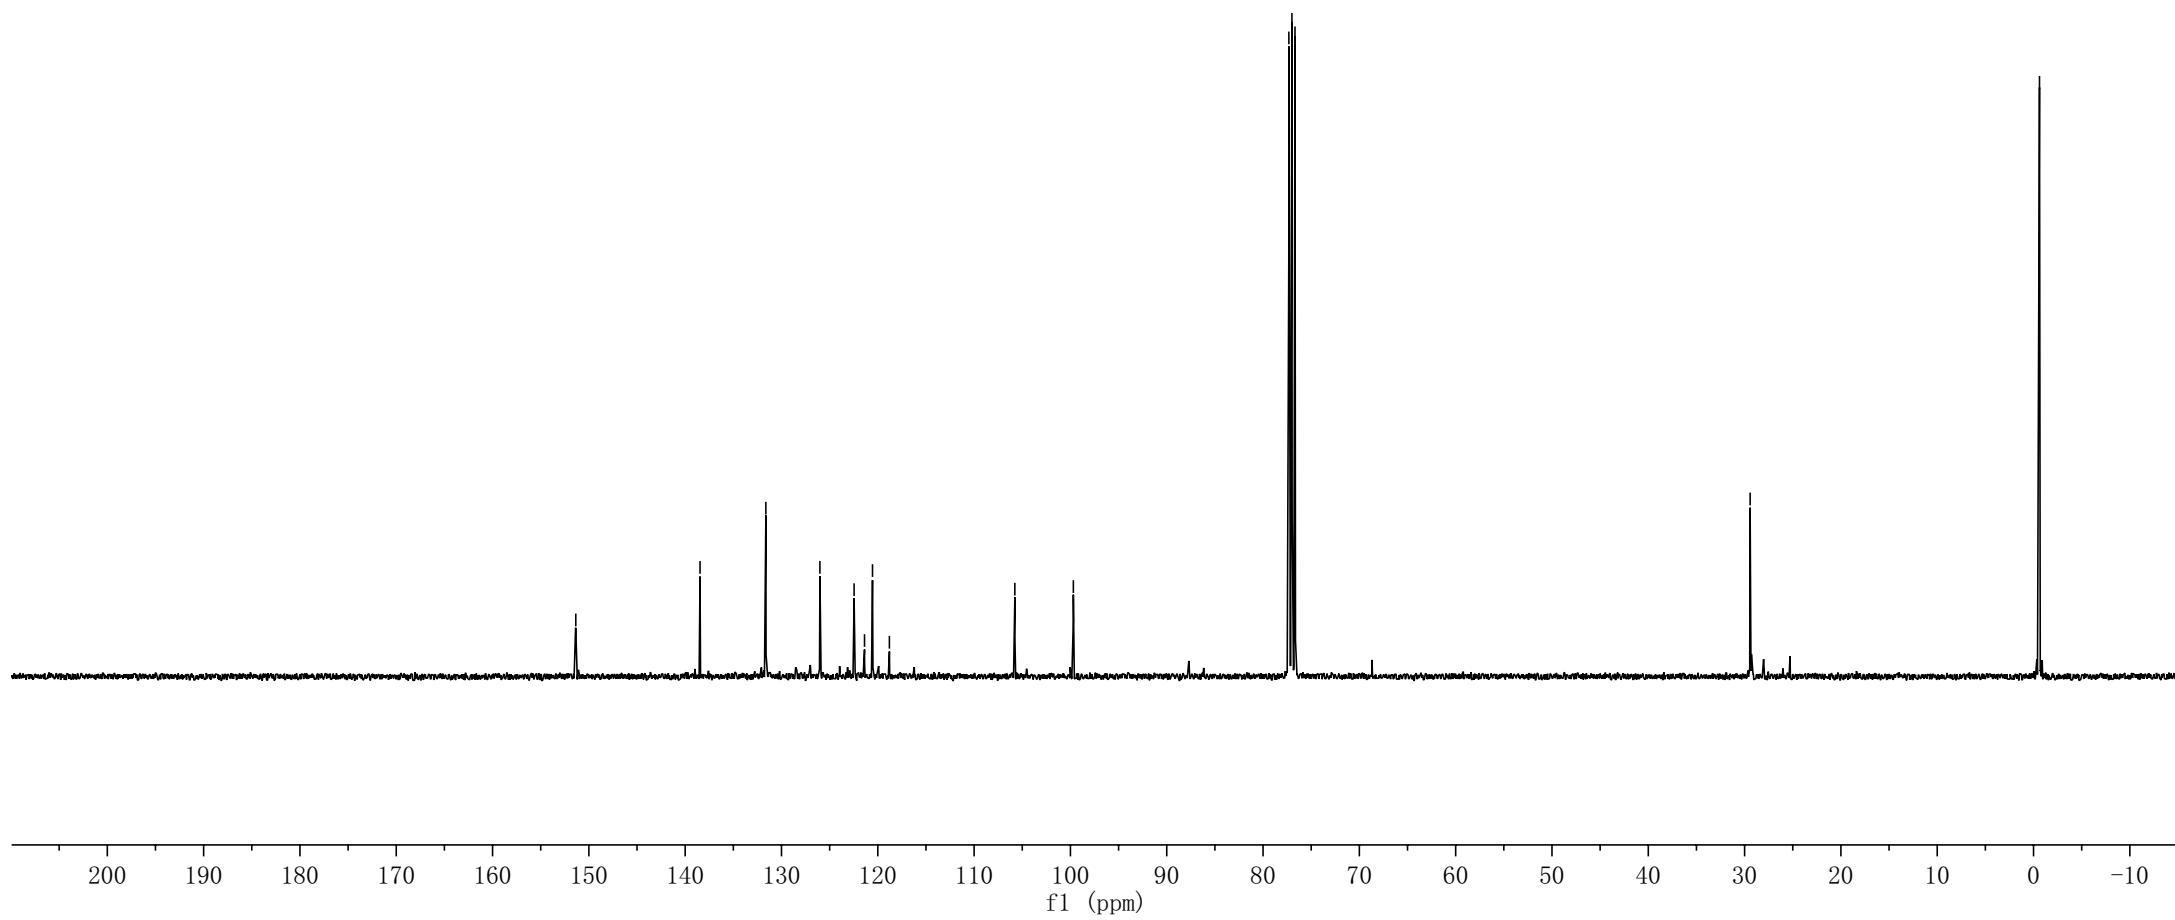

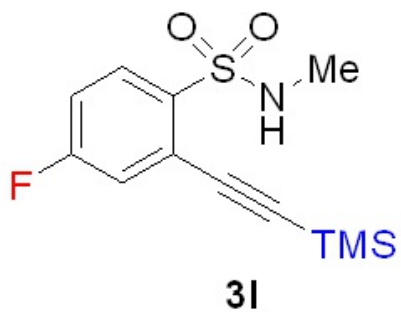

CDCl<sub>3</sub>, 400 MHz

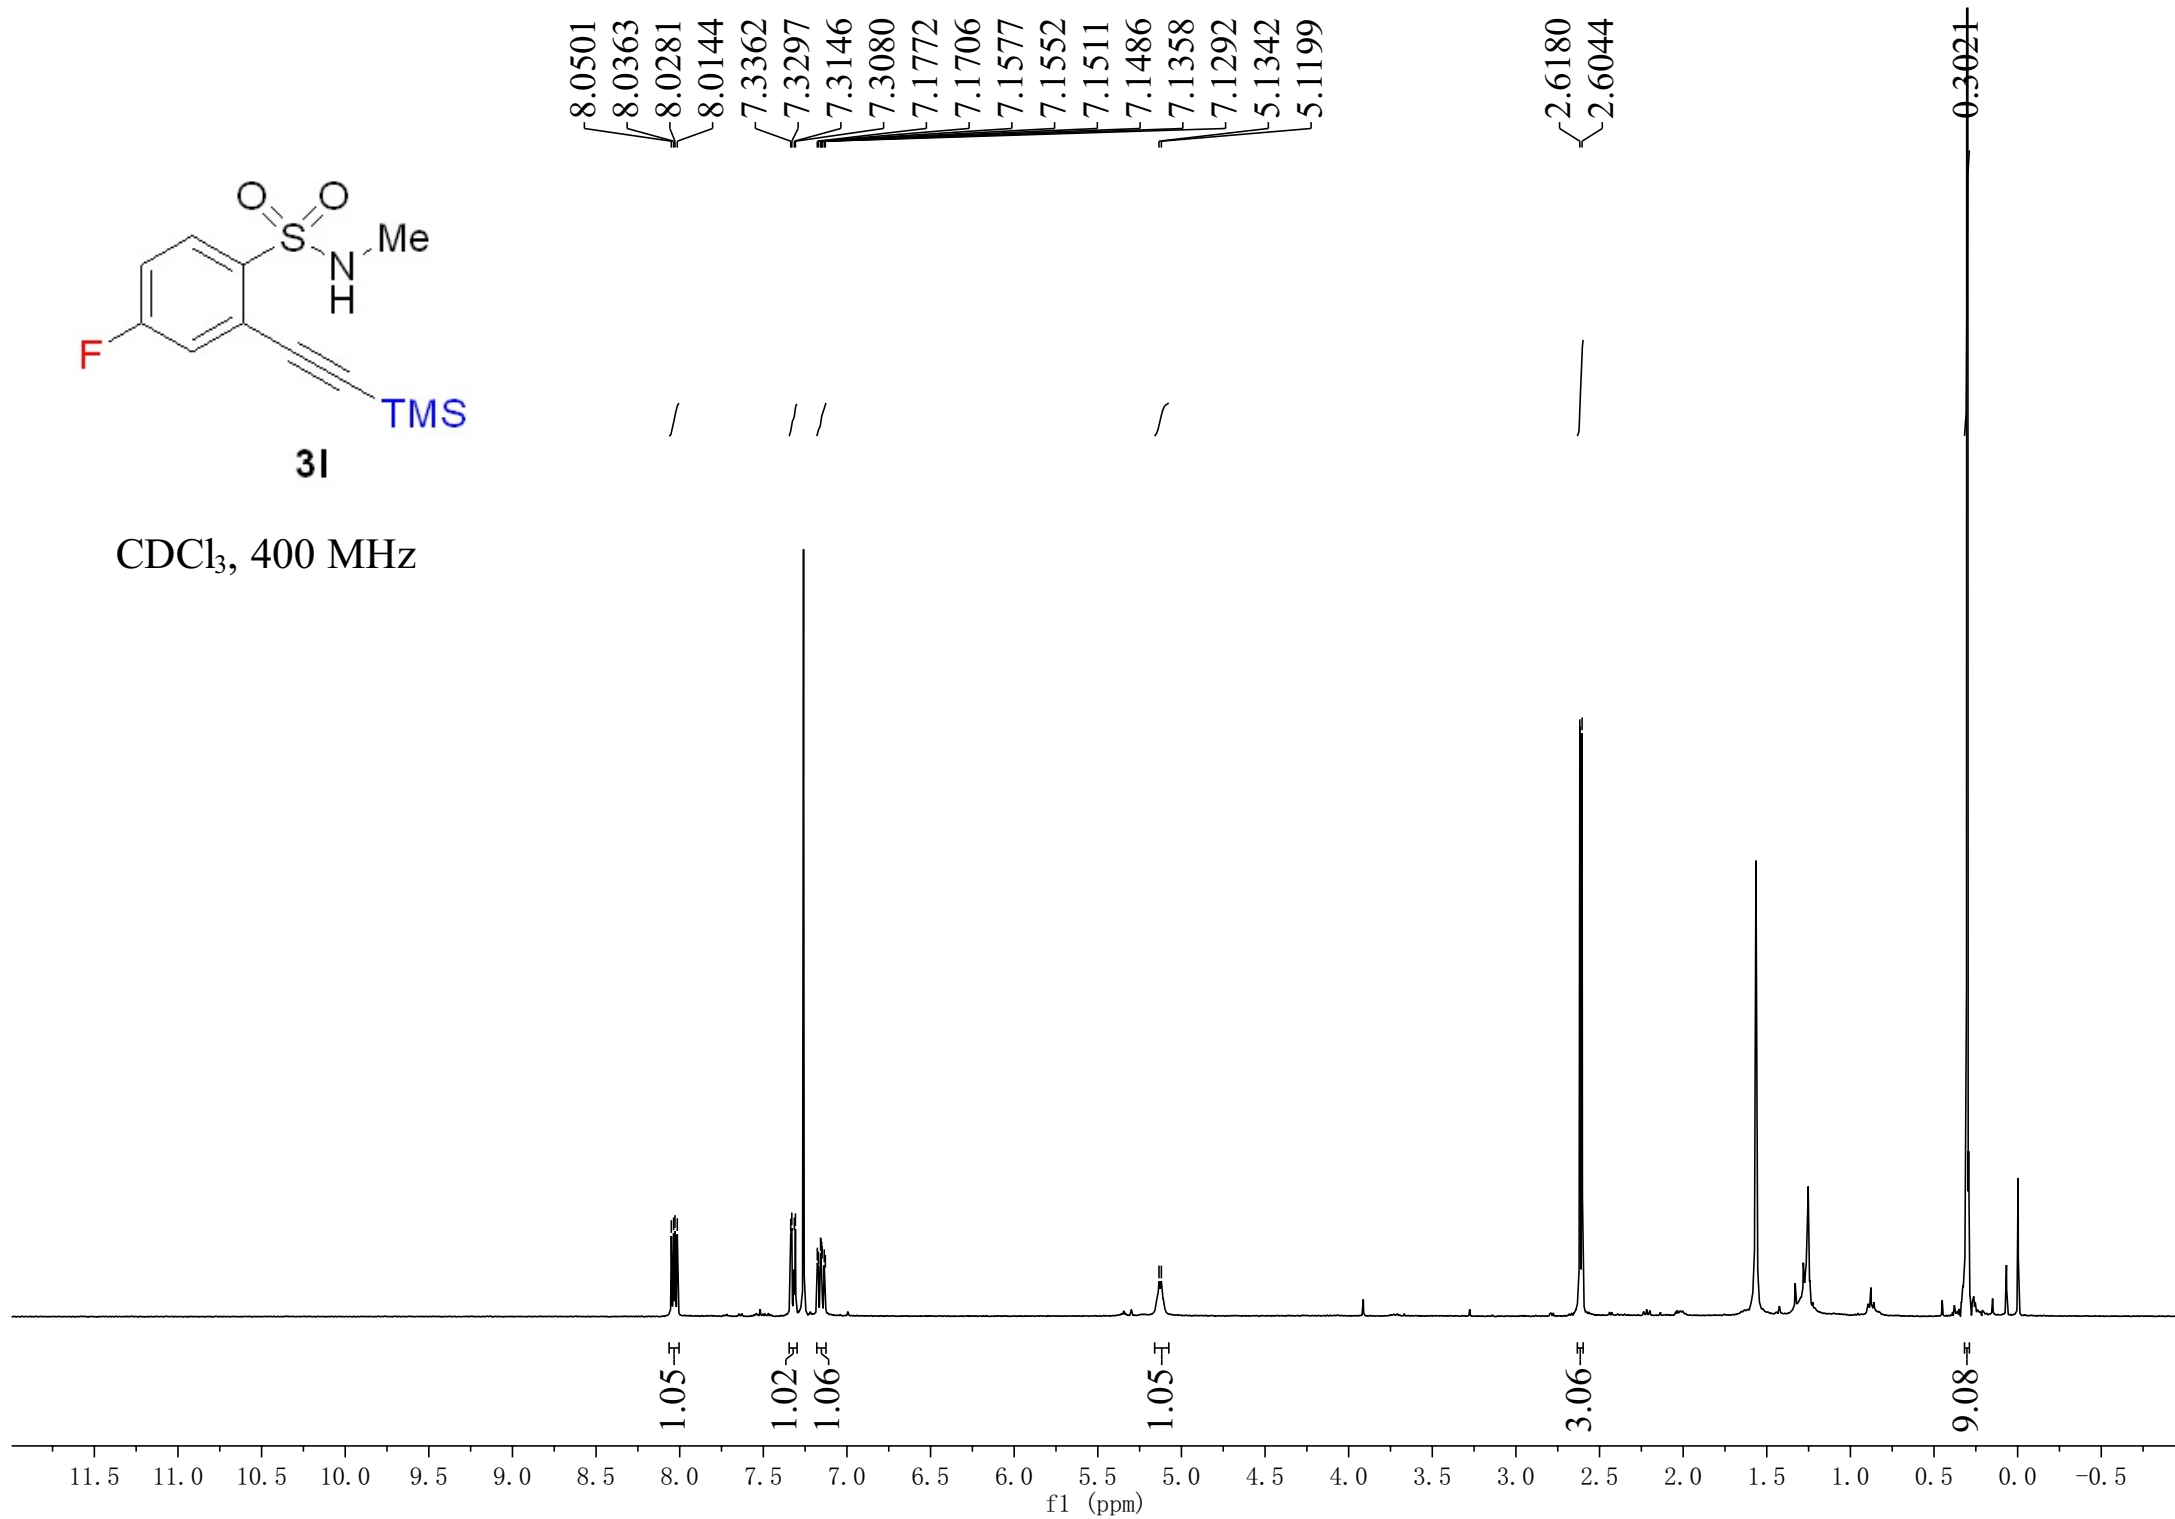



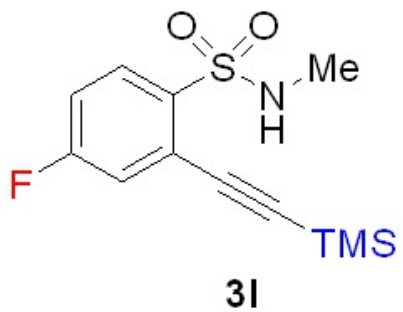

CDCl<sub>3</sub>, 101 MHz

~165.43  
~162.89

136.35  
132.27  
132.18  
122.84  
122.73  
121.56  
121.32  
116.20  
115.98  
105.27  
105.24

77.32  
77.00  
76.68

-29.42

-0.55

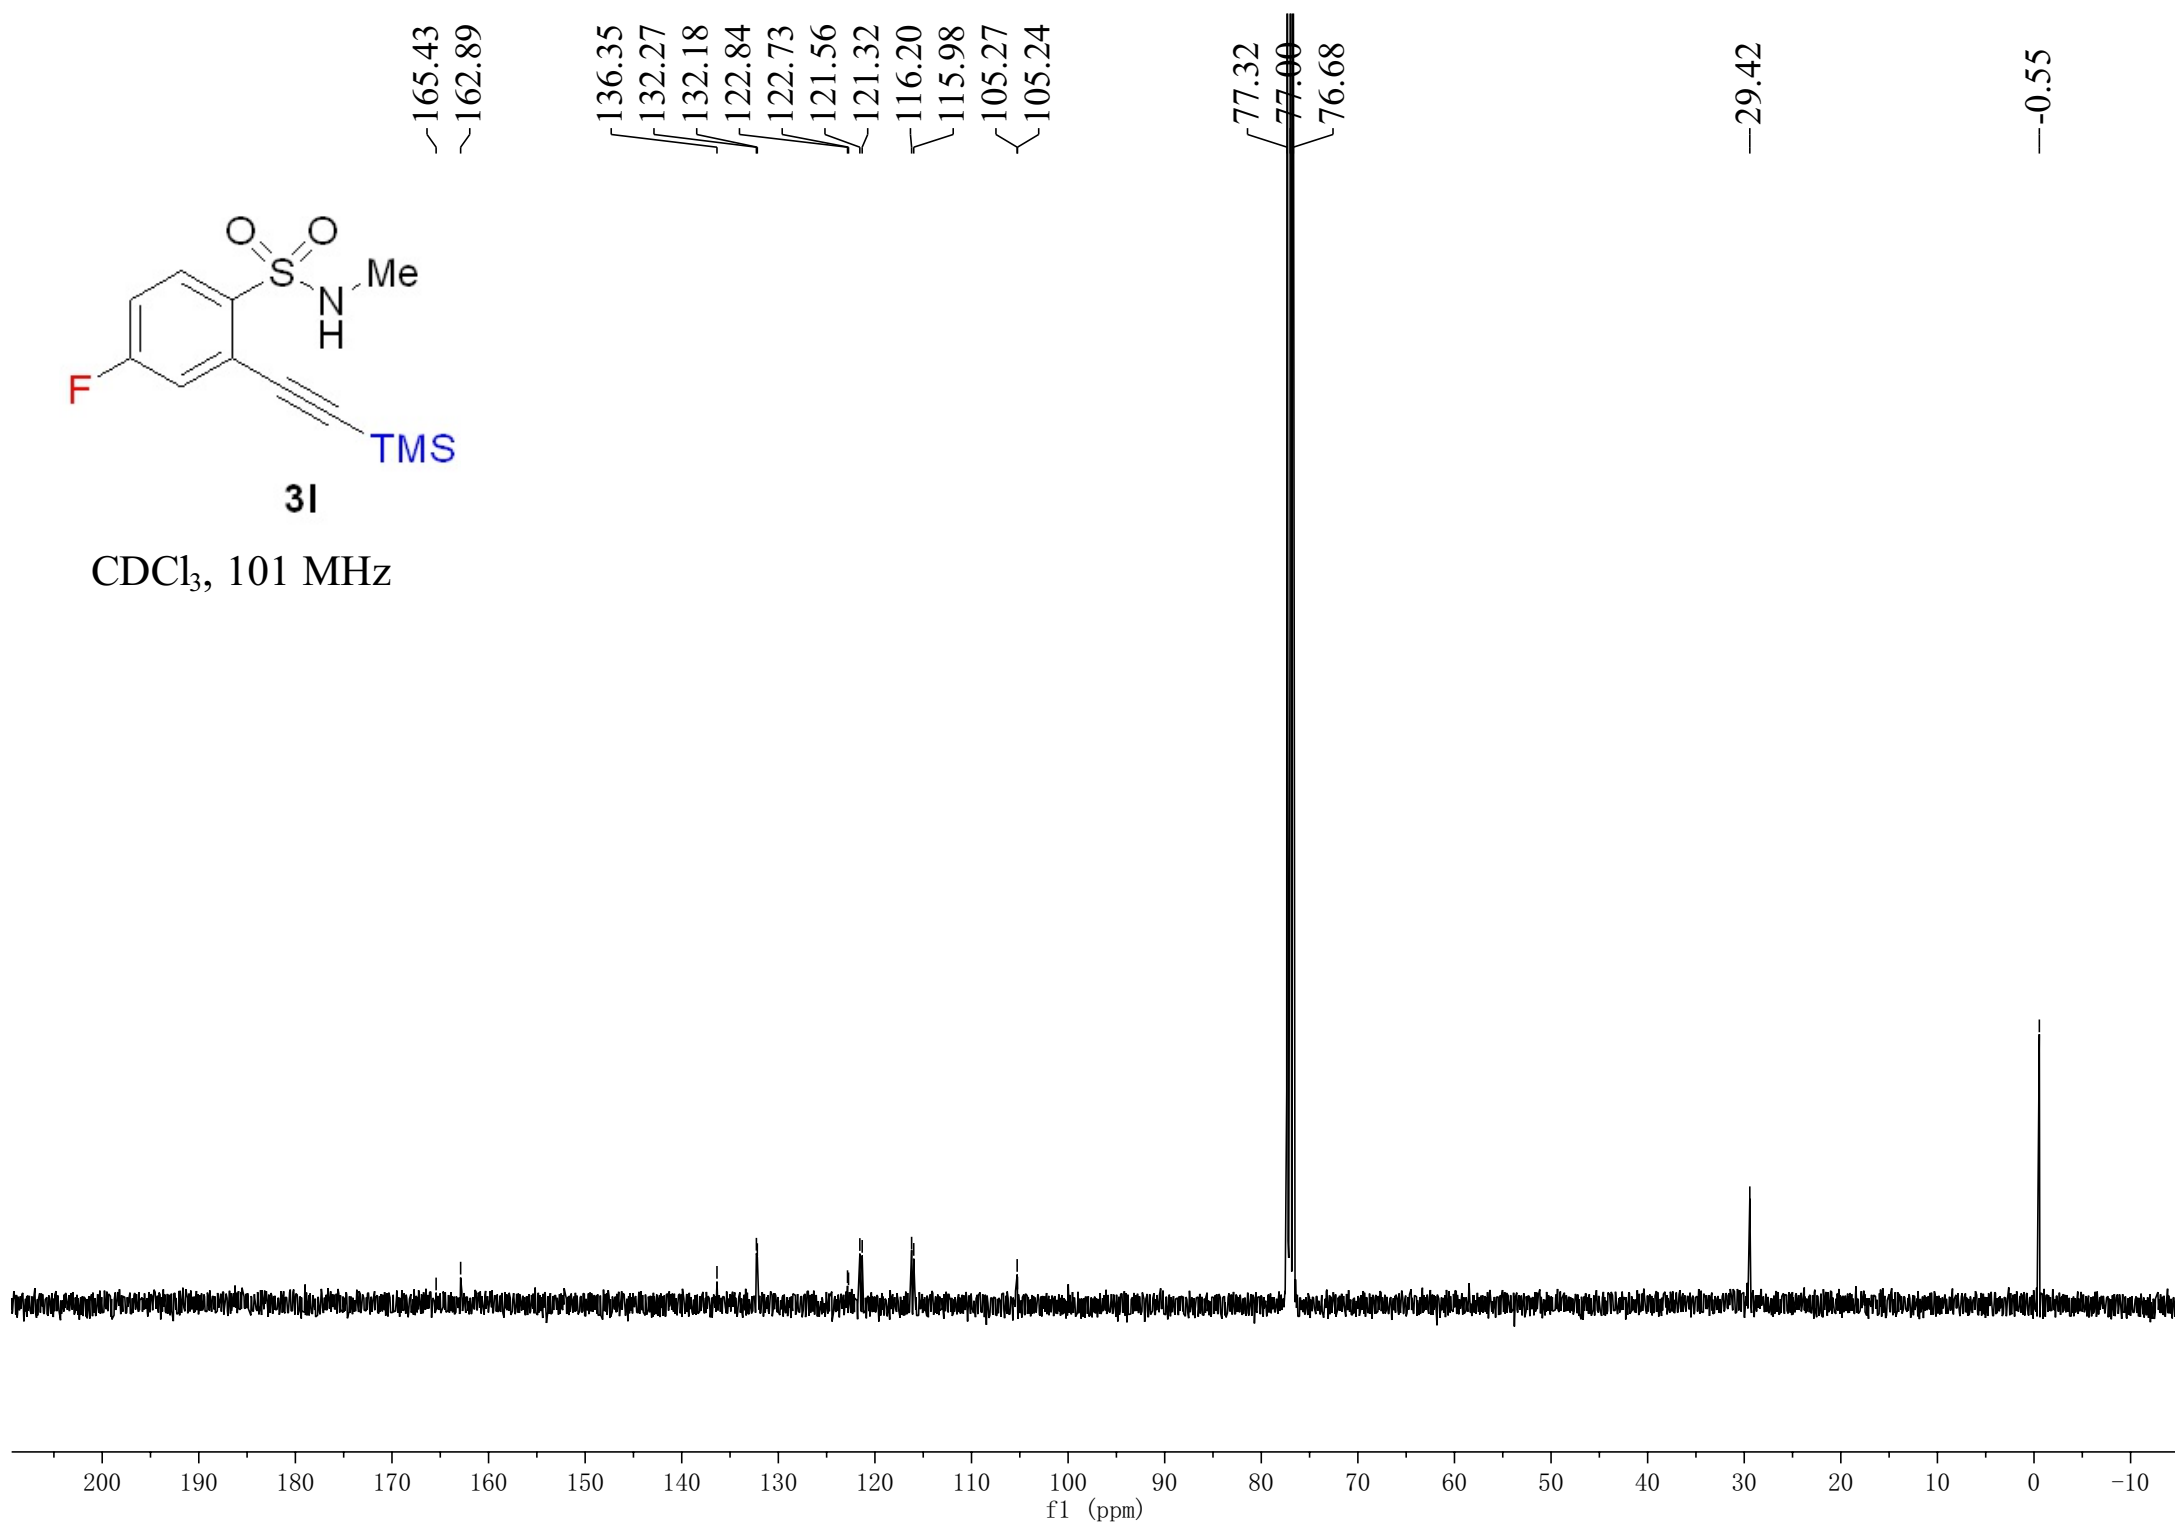

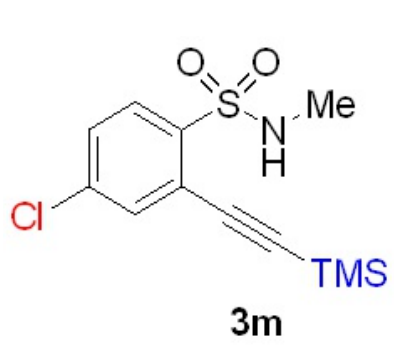

CDCl<sub>3</sub>, 400 MHz

7.9497  
7.9285  
7.6059  
7.6005  
7.4378  
7.4324  
7.4165  
7.4111  
7.2601

5.1588  
5.1453  
5.1318  
5.1183

2.6070  
2.5935

0.2941  
0.2853  
0.2764

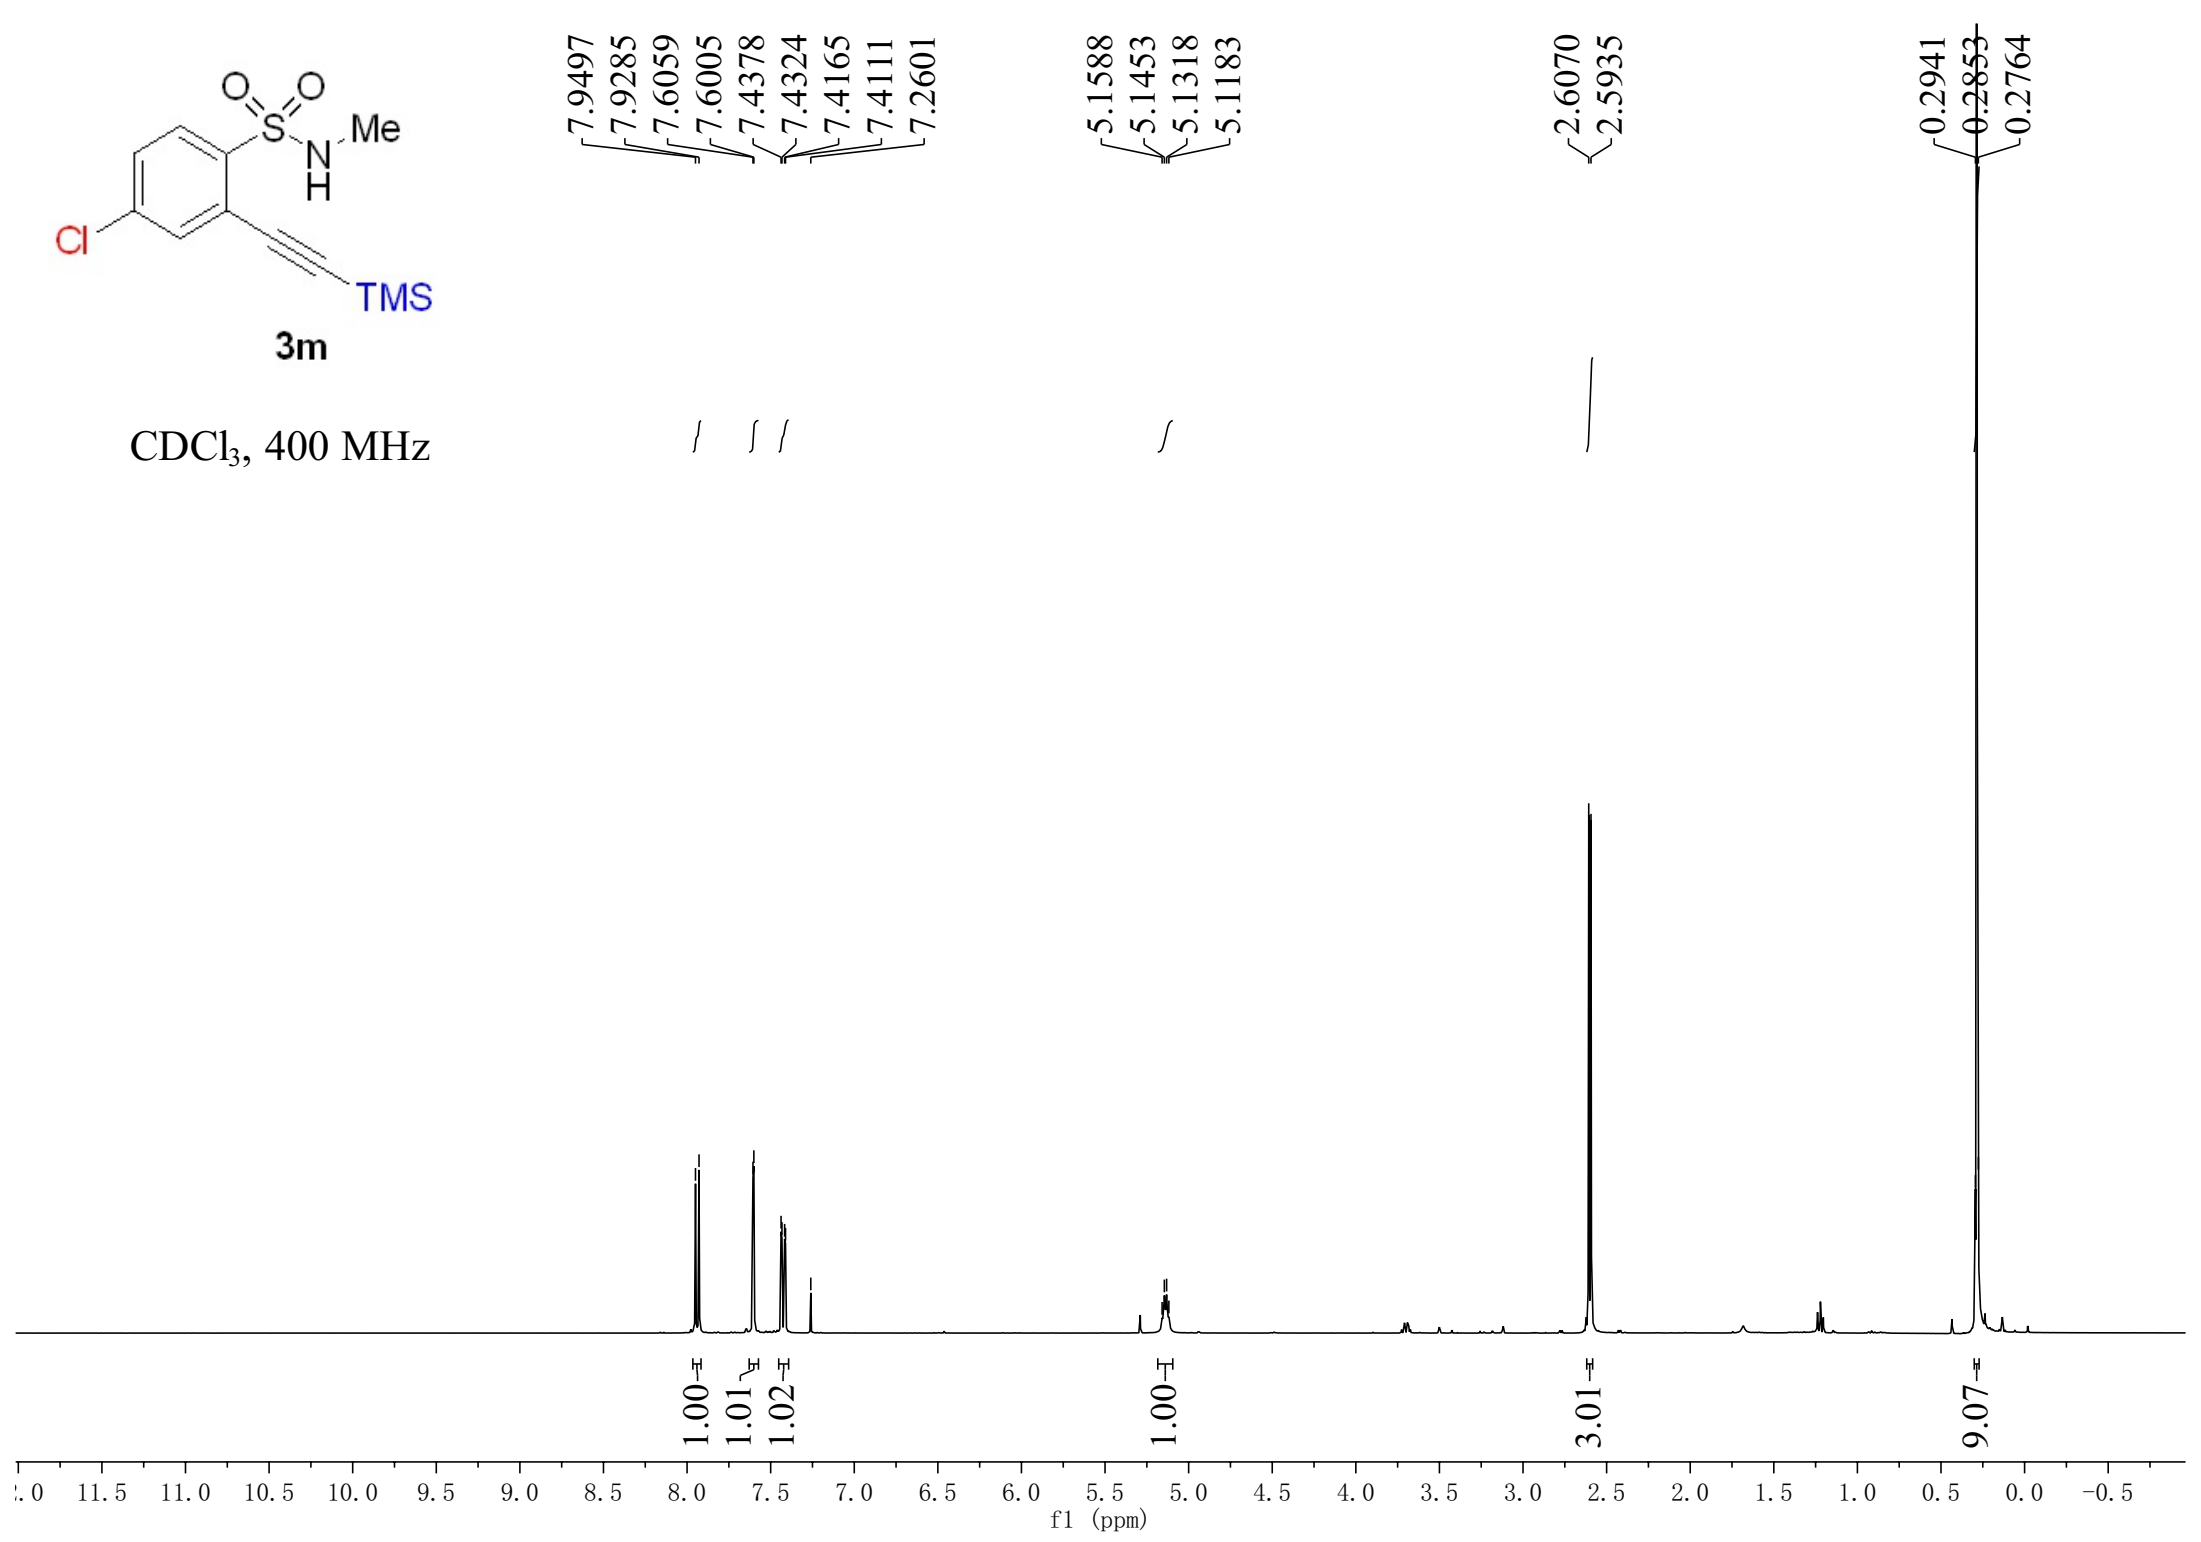



CDCl<sub>3</sub>, 101 MHz

138.50  
138.42  
134.12  
130.82  
128.93  
121.79

-105.33  
-99.82

77.32  
77.00  
76.68

-29.38

-0.60

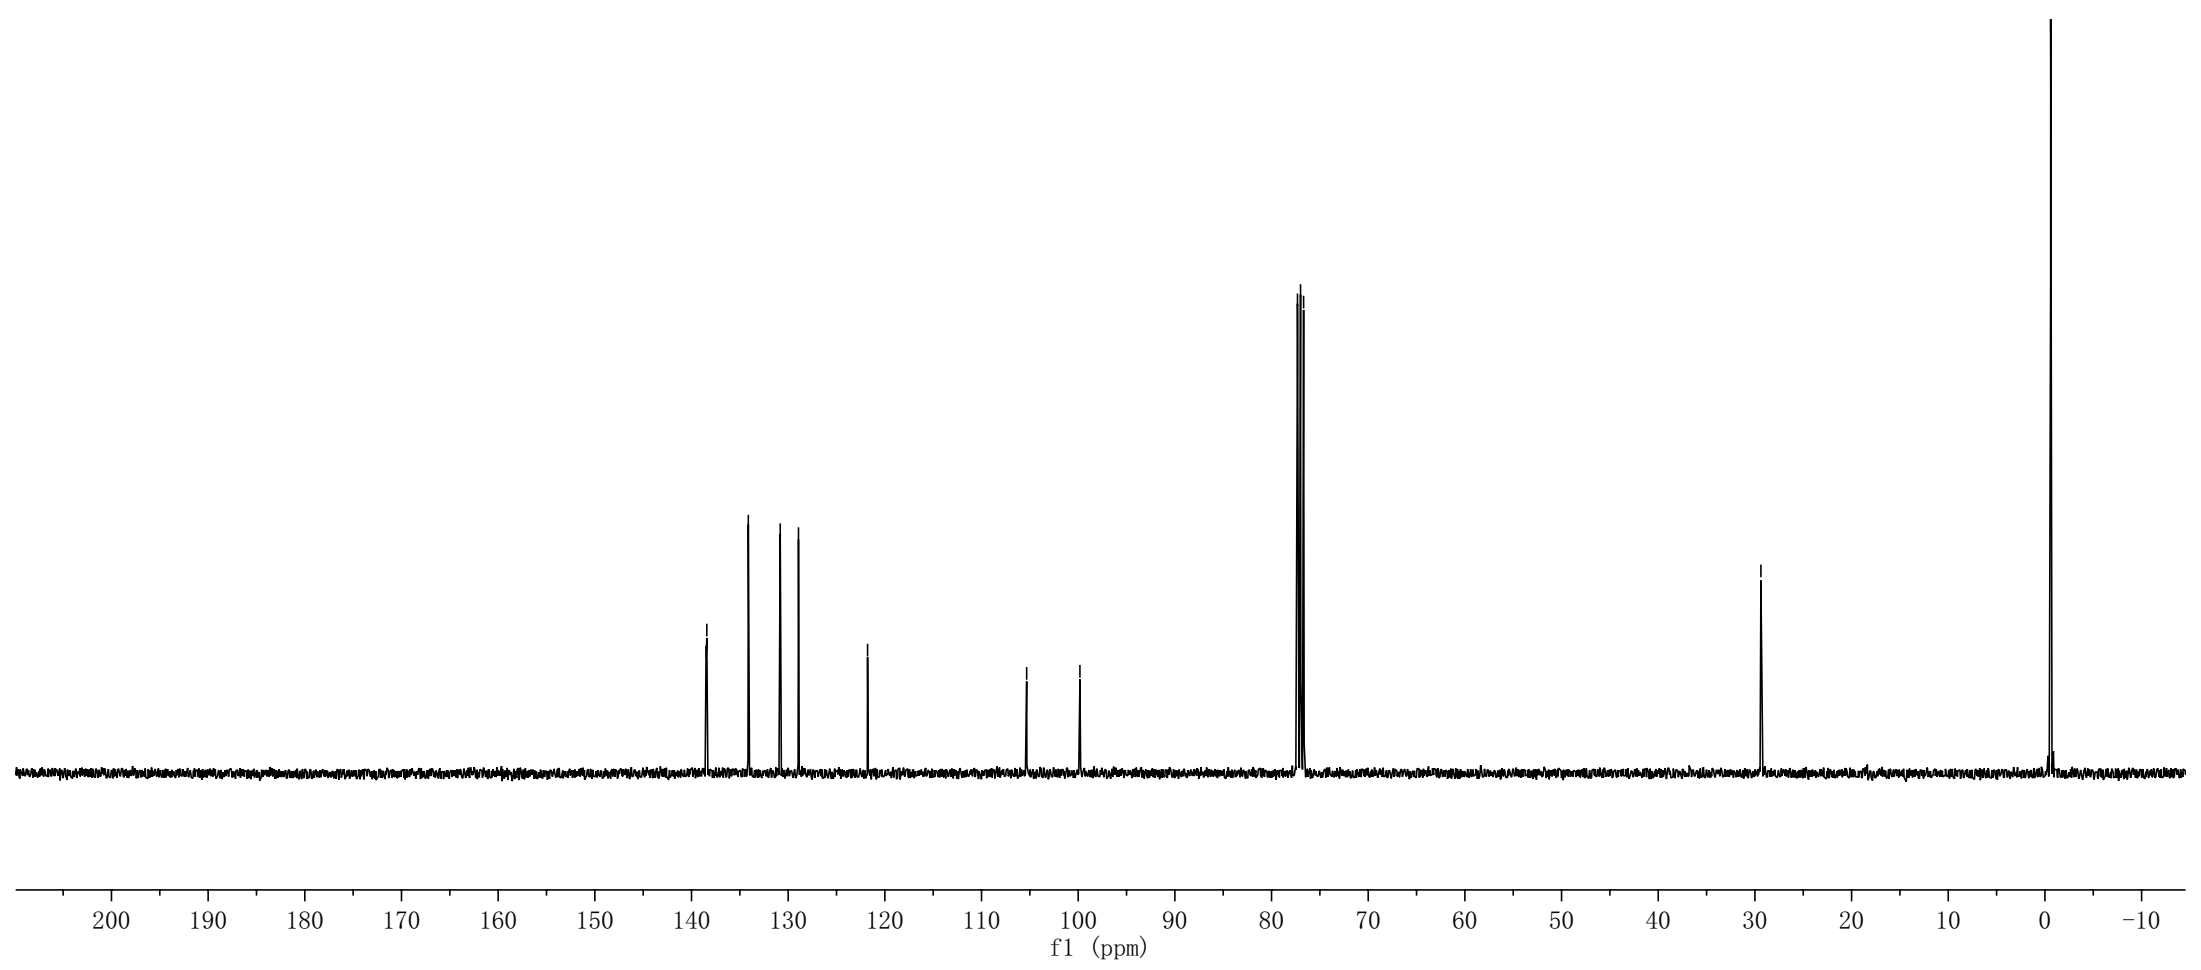

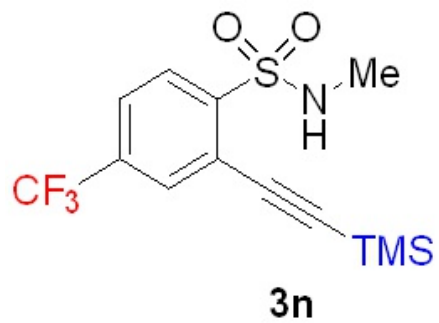

CDCl<sub>3</sub>, 400 MHz

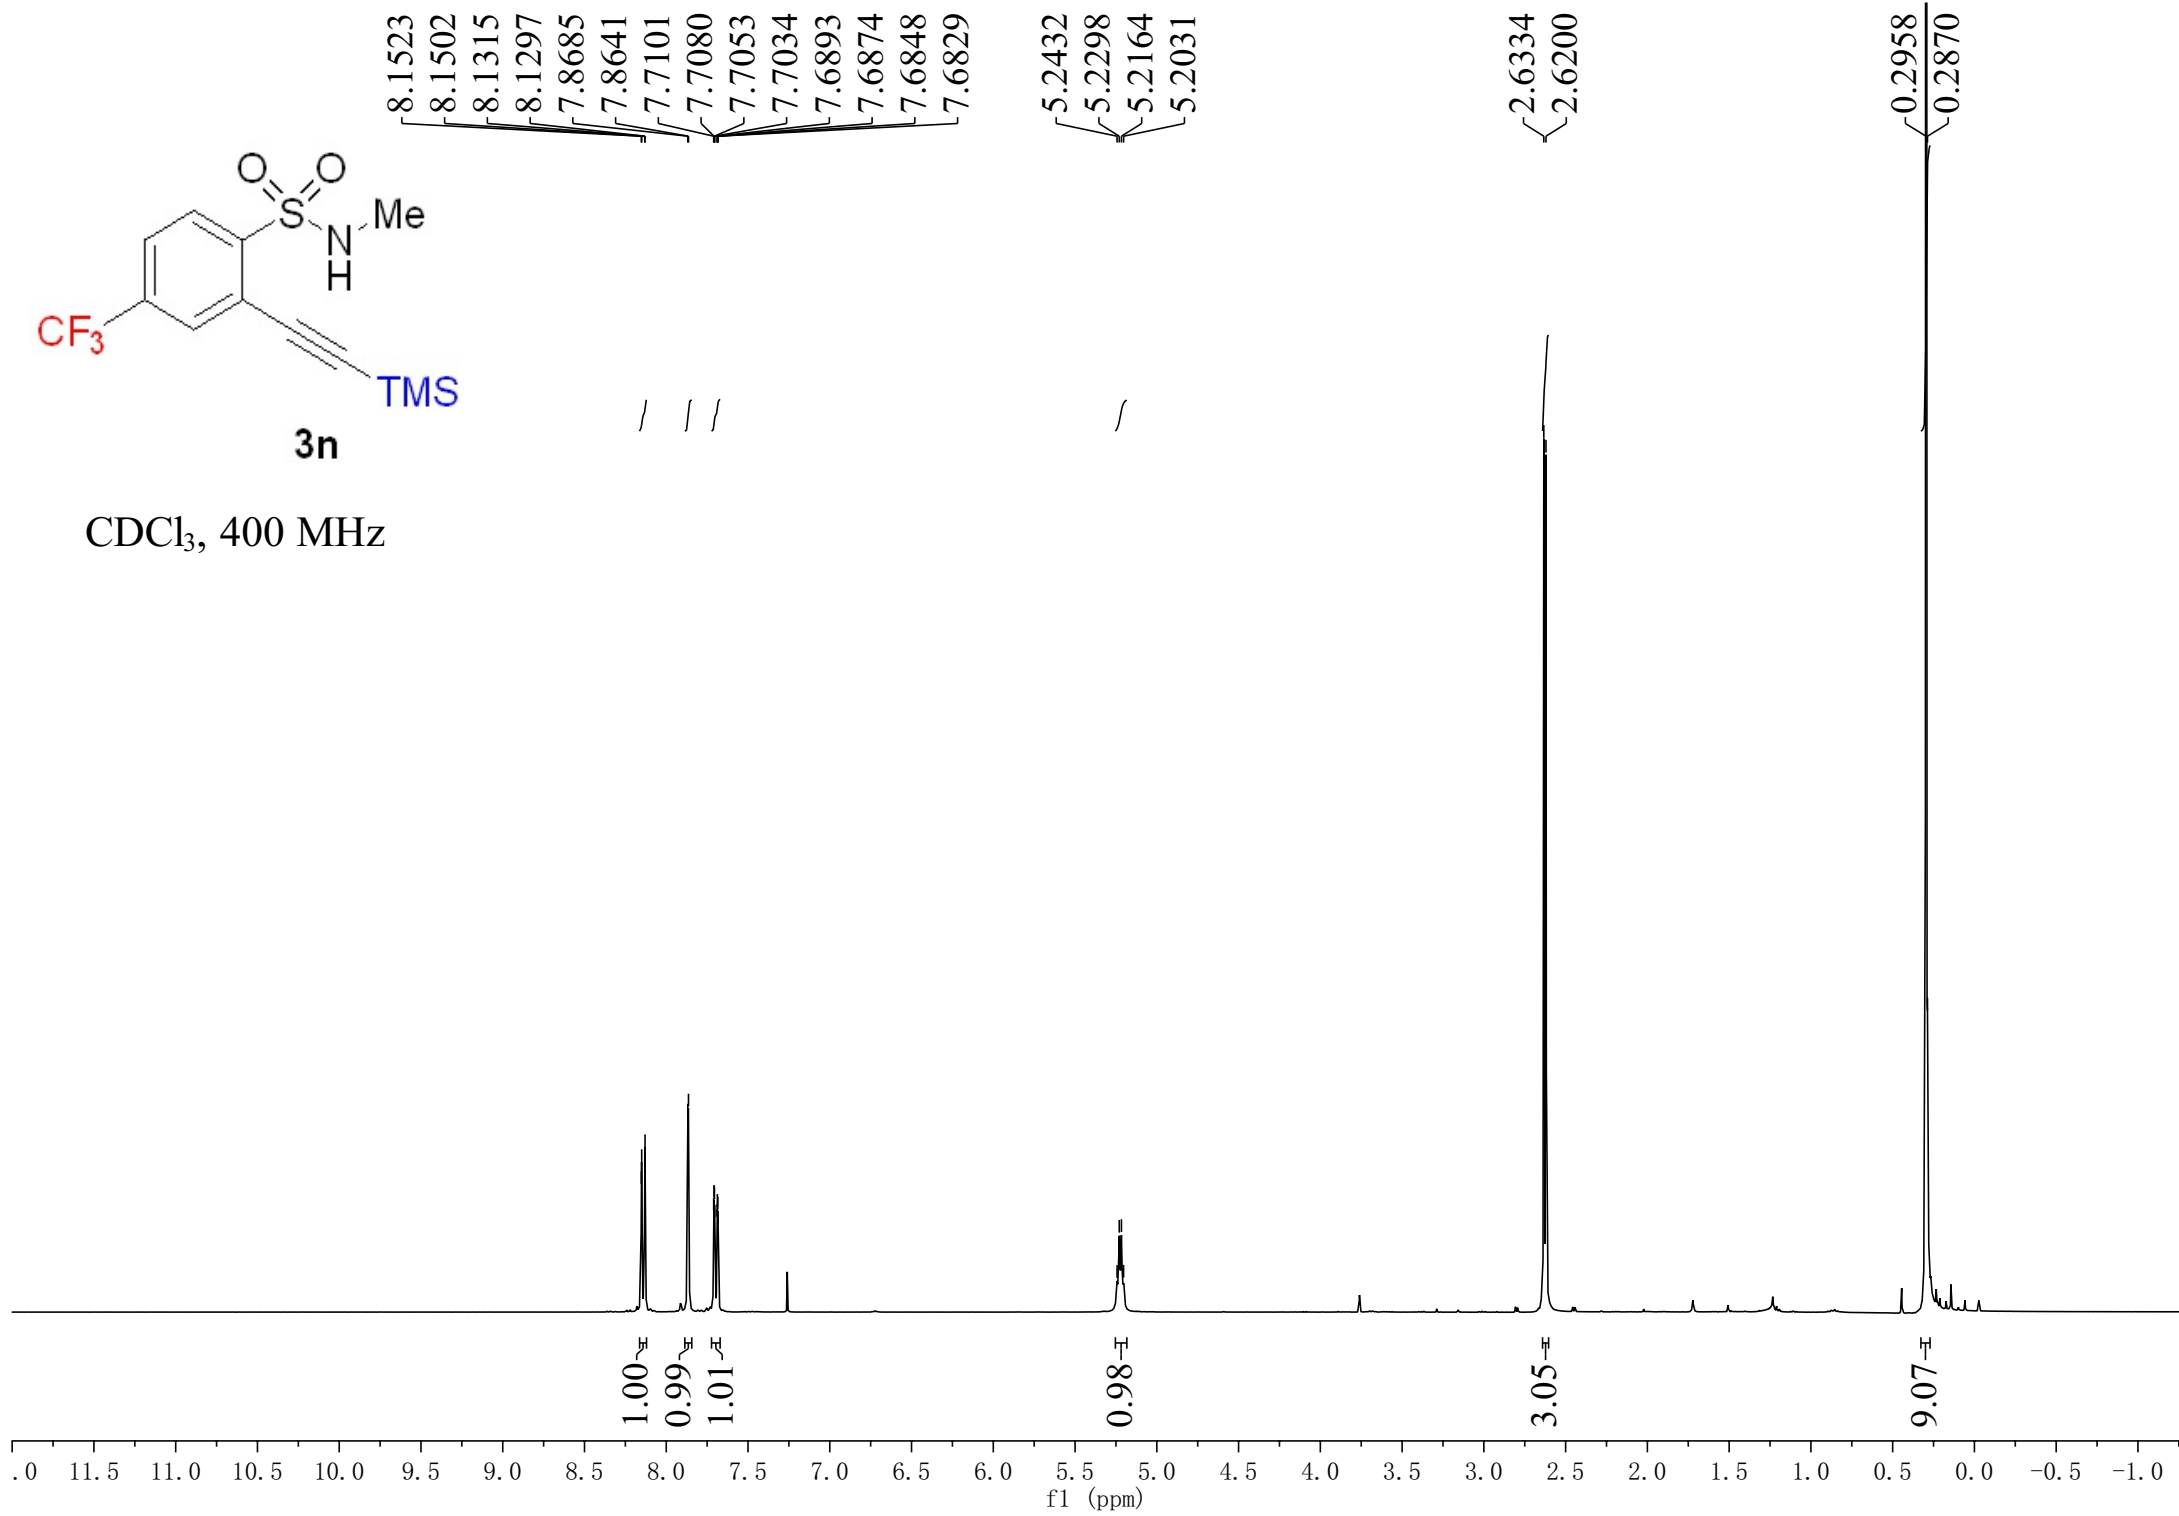

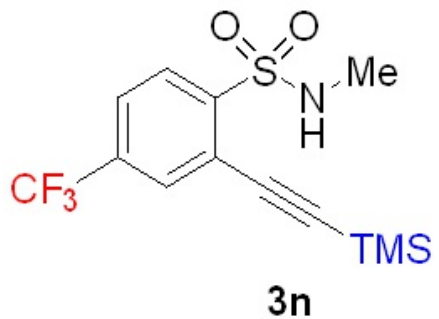

CDCl<sub>3</sub>, 101 MHz

143.417  
134.566  
134.234  
133.902  
133.568  
131.417  
131.381  
131.344  
131.306  
130.058  
126.788  
125.422  
125.385  
125.349  
125.312  
124.074  
121.359  
121.254  
118.646  
106.052  
99.764  
77.318  
77.000  
76.681  
29.350  
0.675

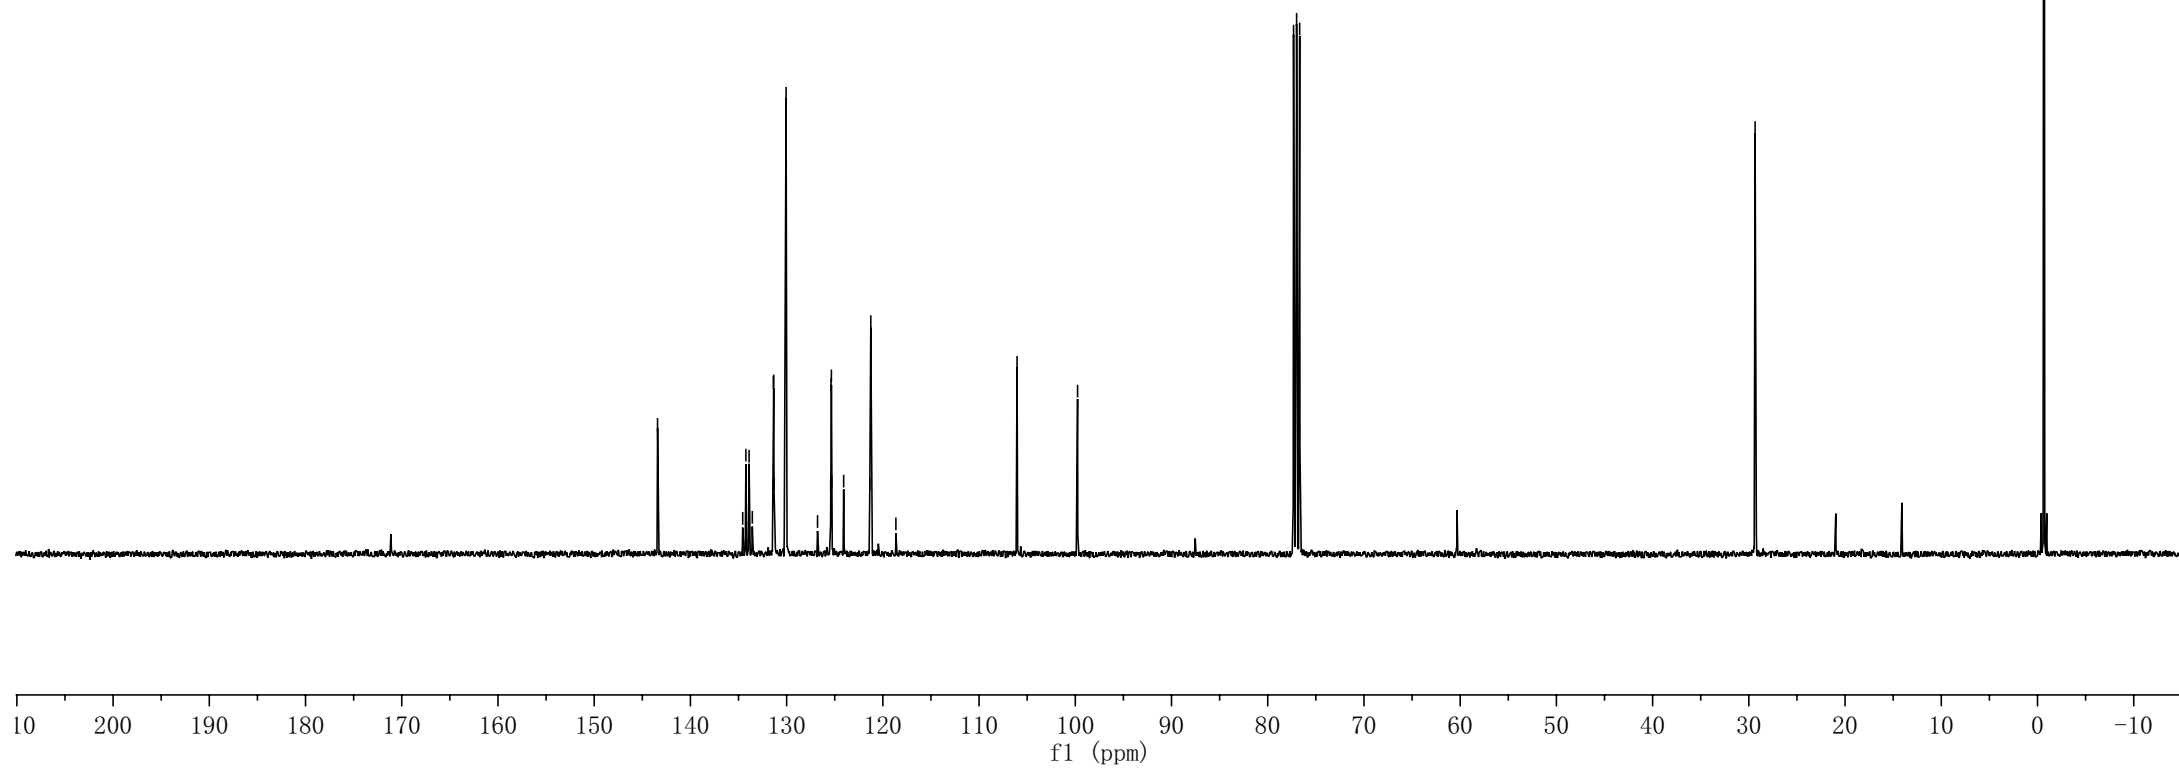

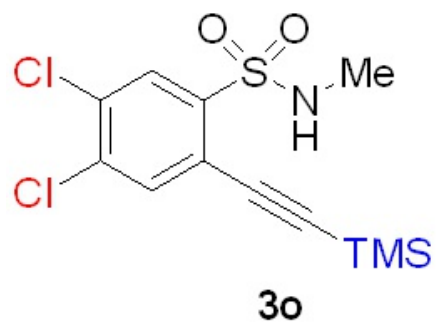

CDCl<sub>3</sub>, 400 MHz

8.0523  
7.6824  
7.2596

5.1811  
5.1675  
5.1607  
5.1476  
5.1341  
5.1206  
5.1107  
5.0975  
5.0839

2.6224  
2.6090

0.2667

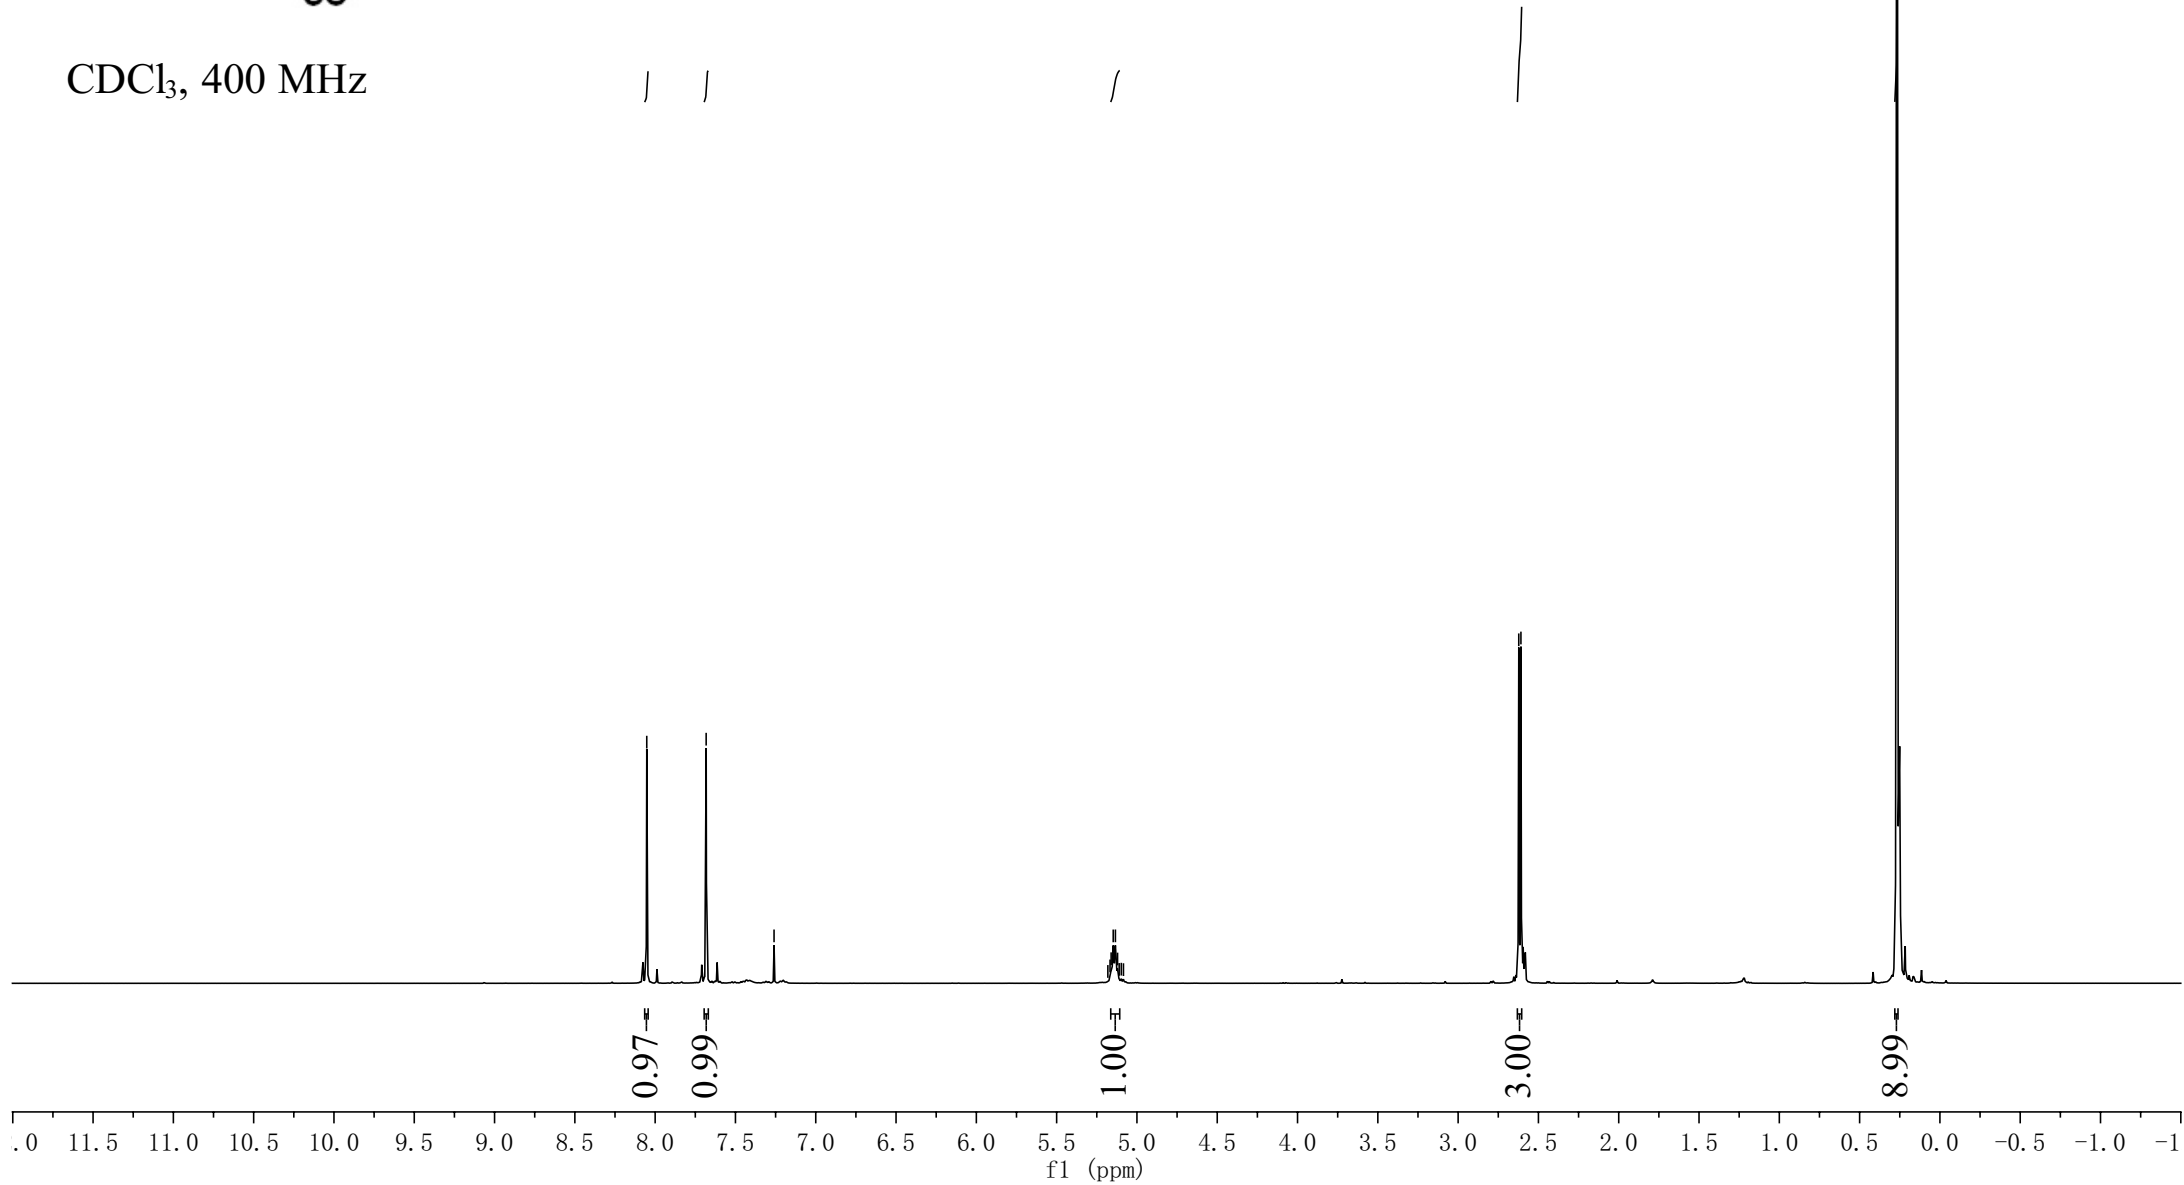

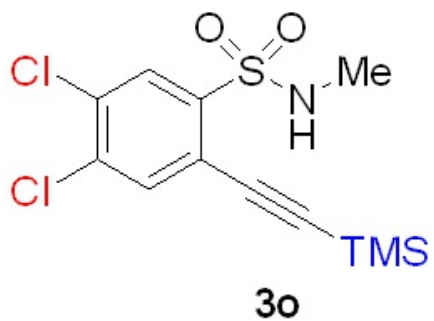

CDCl<sub>3</sub>, 101 MHz

139.57  
136.66  
135.59  
133.31  
131.07  
-119.64  
-105.98  
-98.92  
77.32  
77.00  
76.68  
-29.36  
-0.70

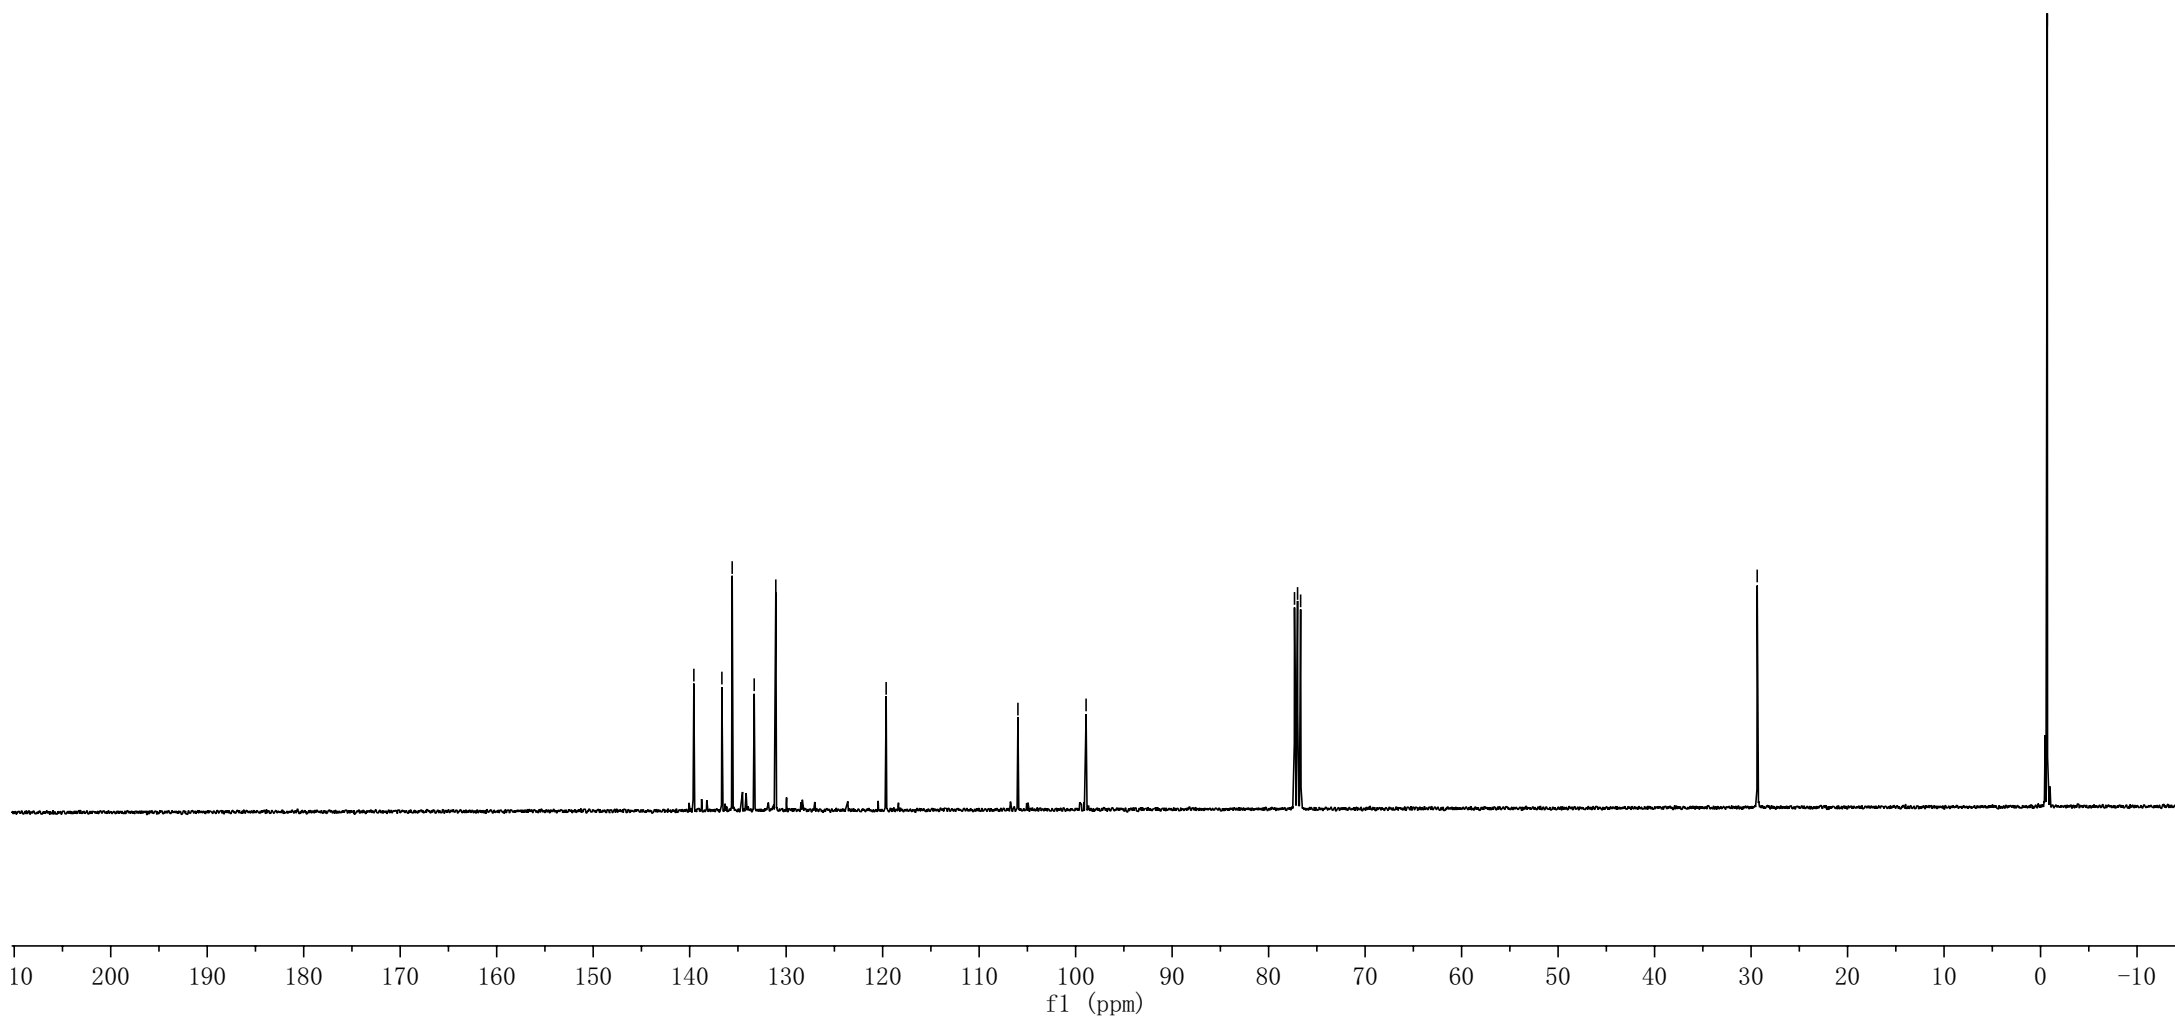

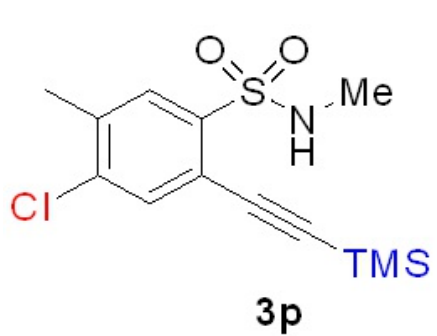

CDCl<sub>3</sub>, 400 MHz

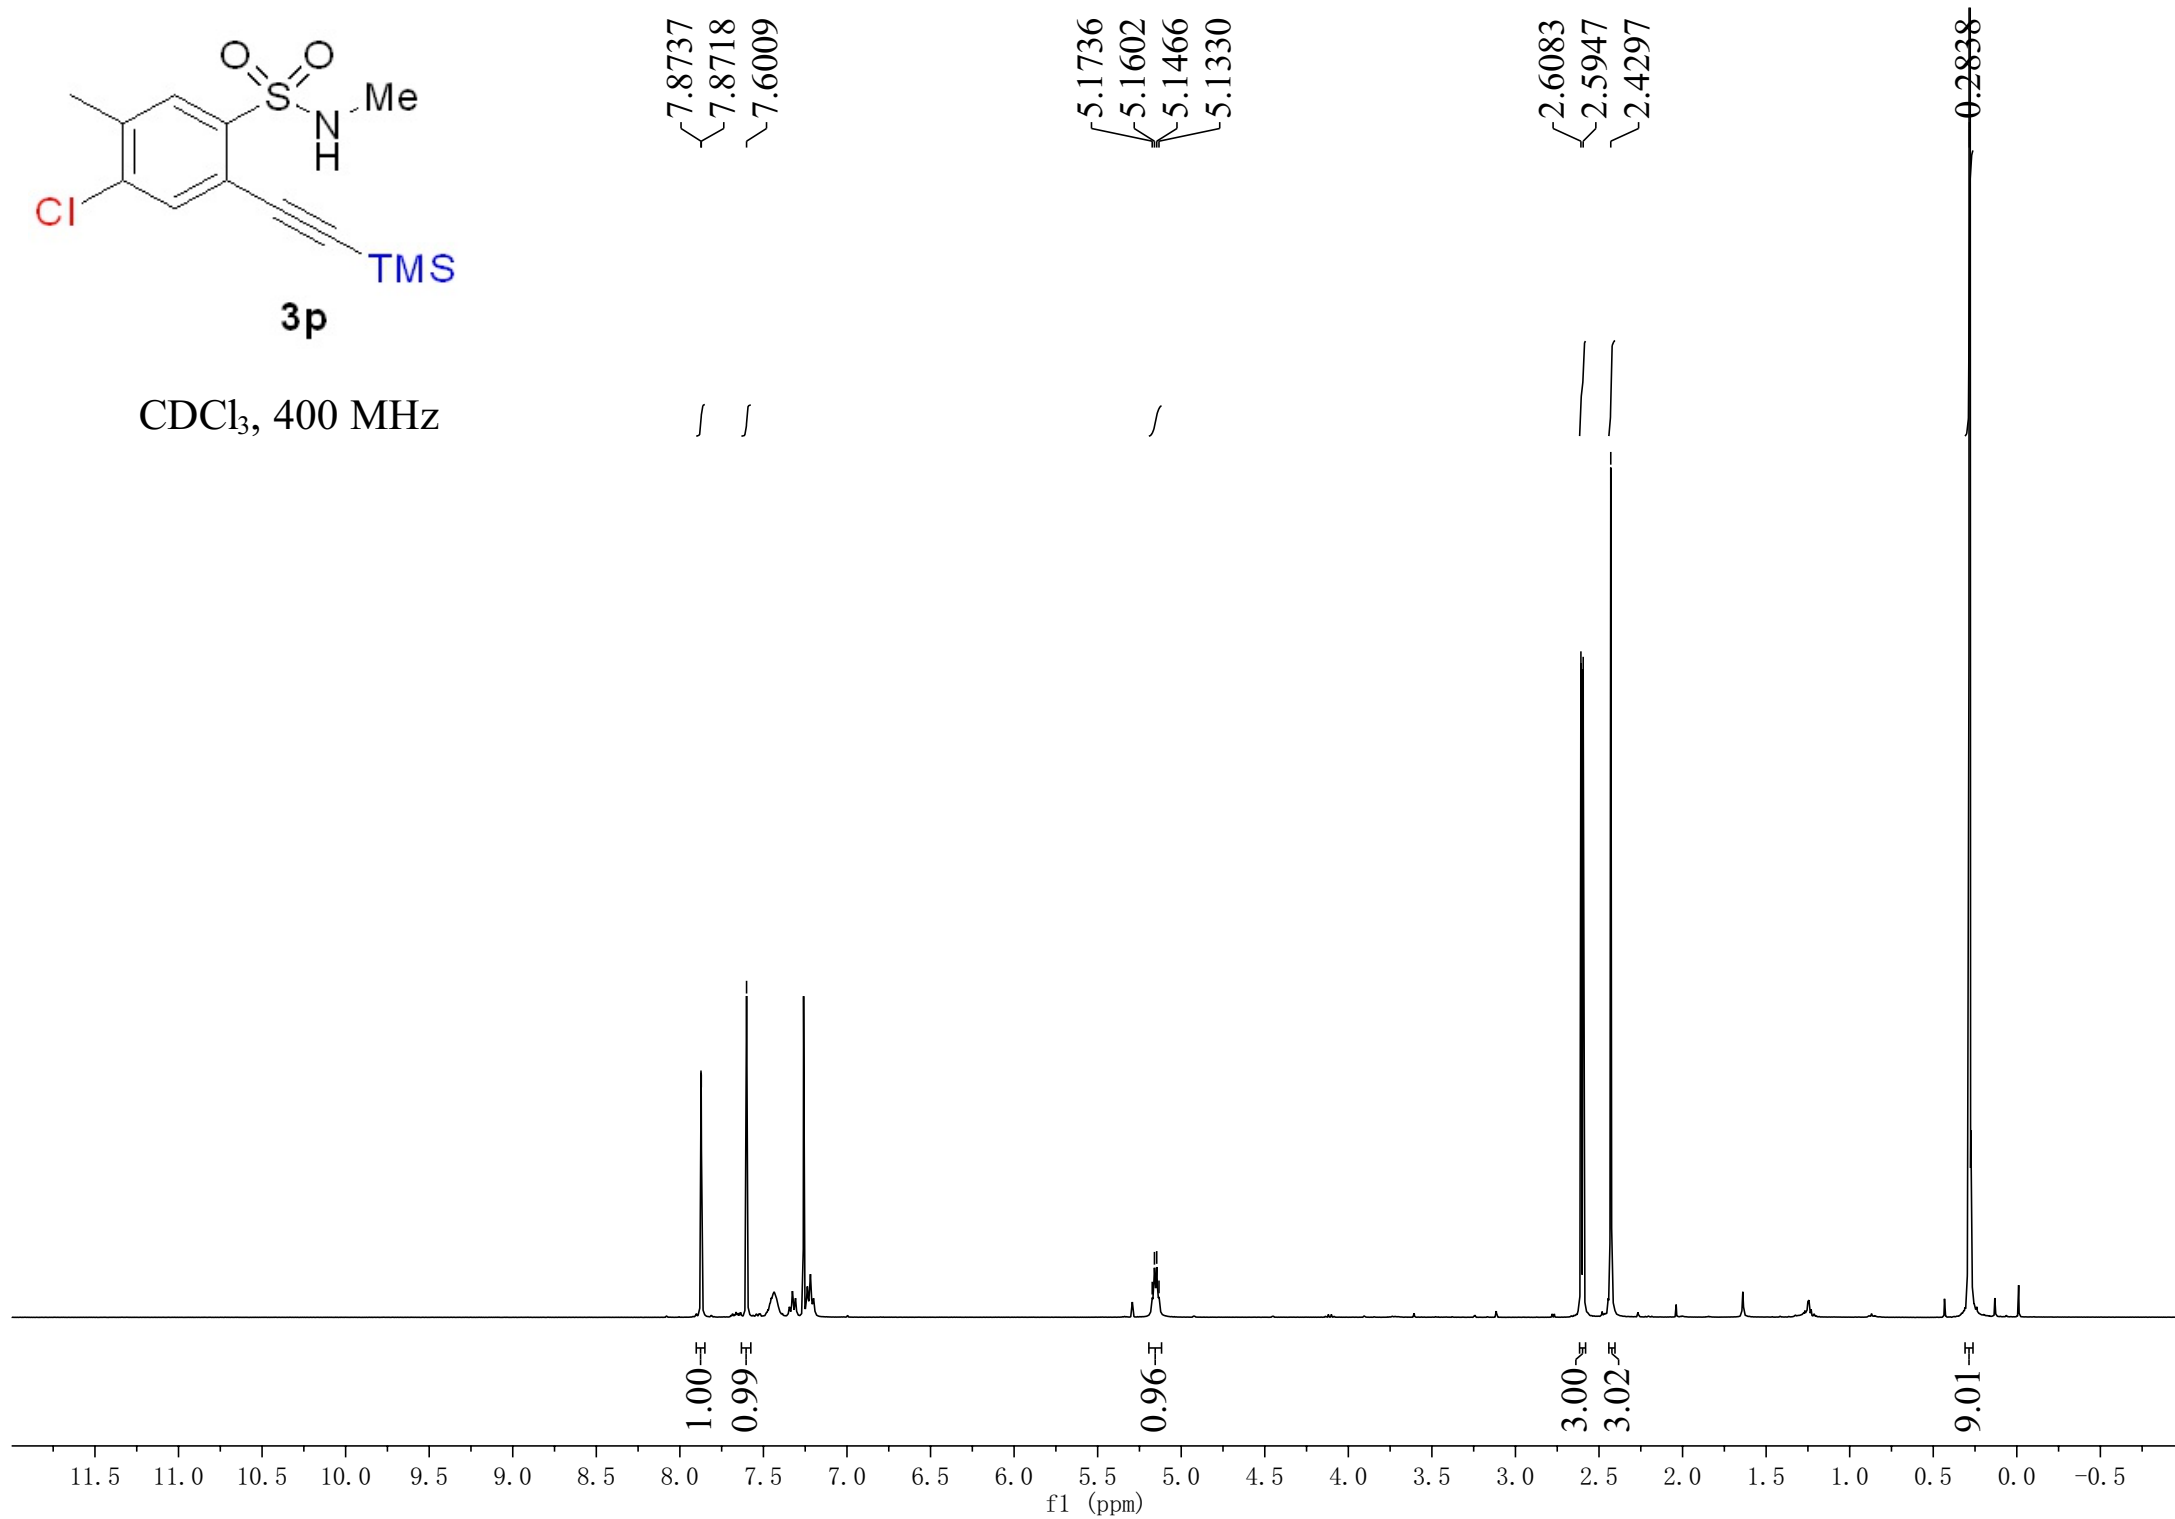



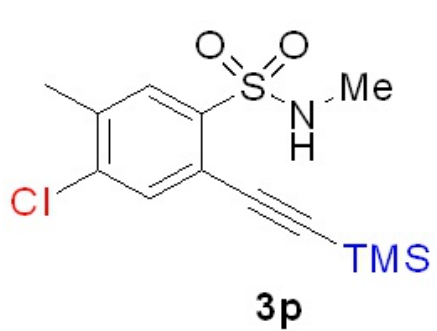

CDCl<sub>3</sub>, 101 MHz

138.37  
138.13  
137.75  
134.49  
131.65  
-118.81  
-104.01  
-99.96  
77.32  
77.00  
76.68  
-29.39  
-20.09  
-0.54

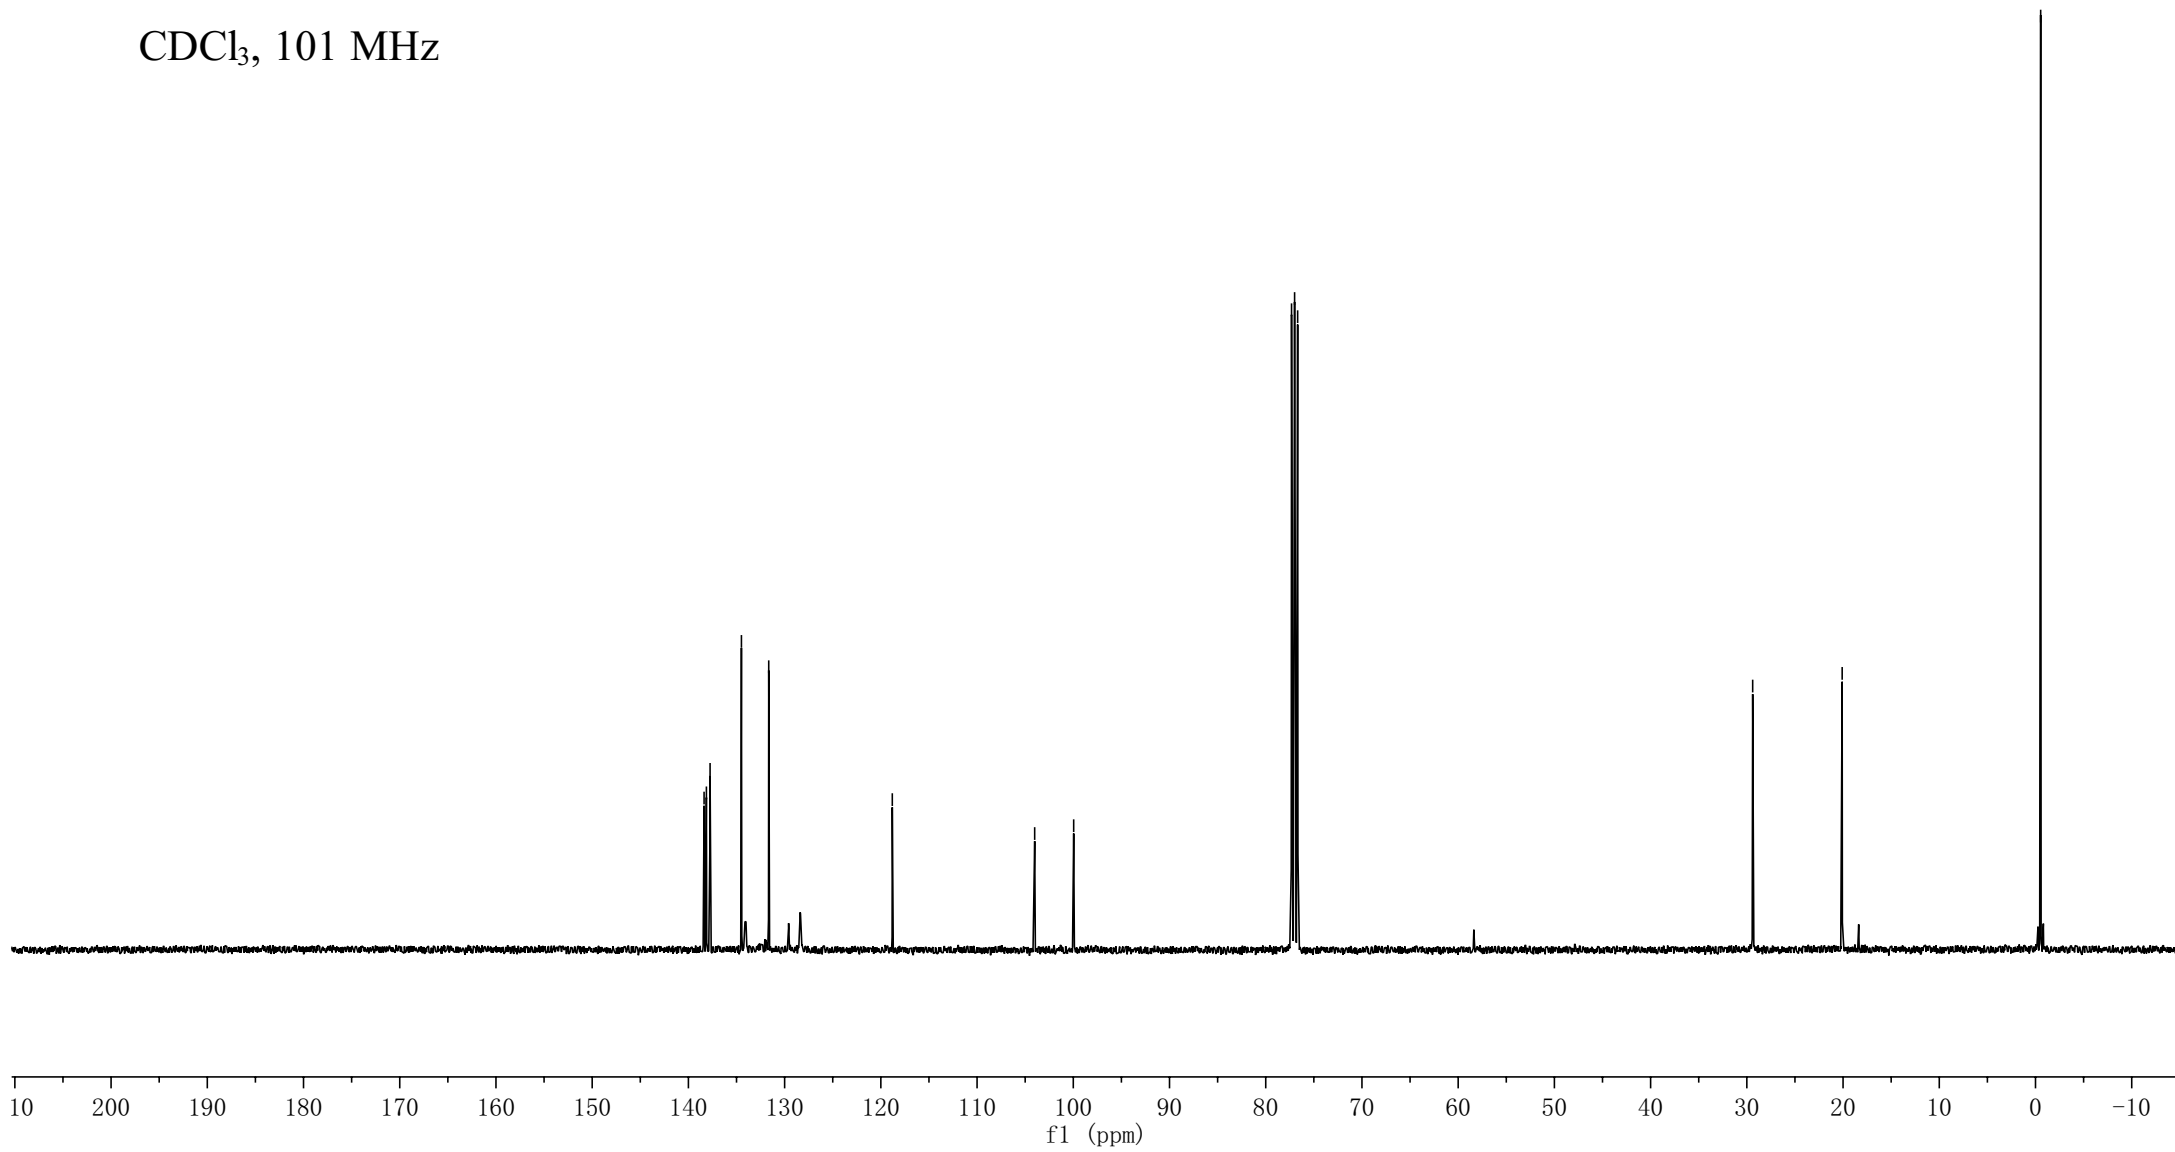

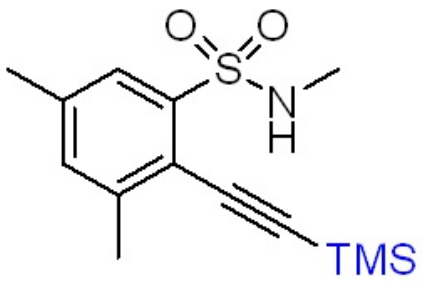

**3q**

CDCl<sub>3</sub>, 400 MHz

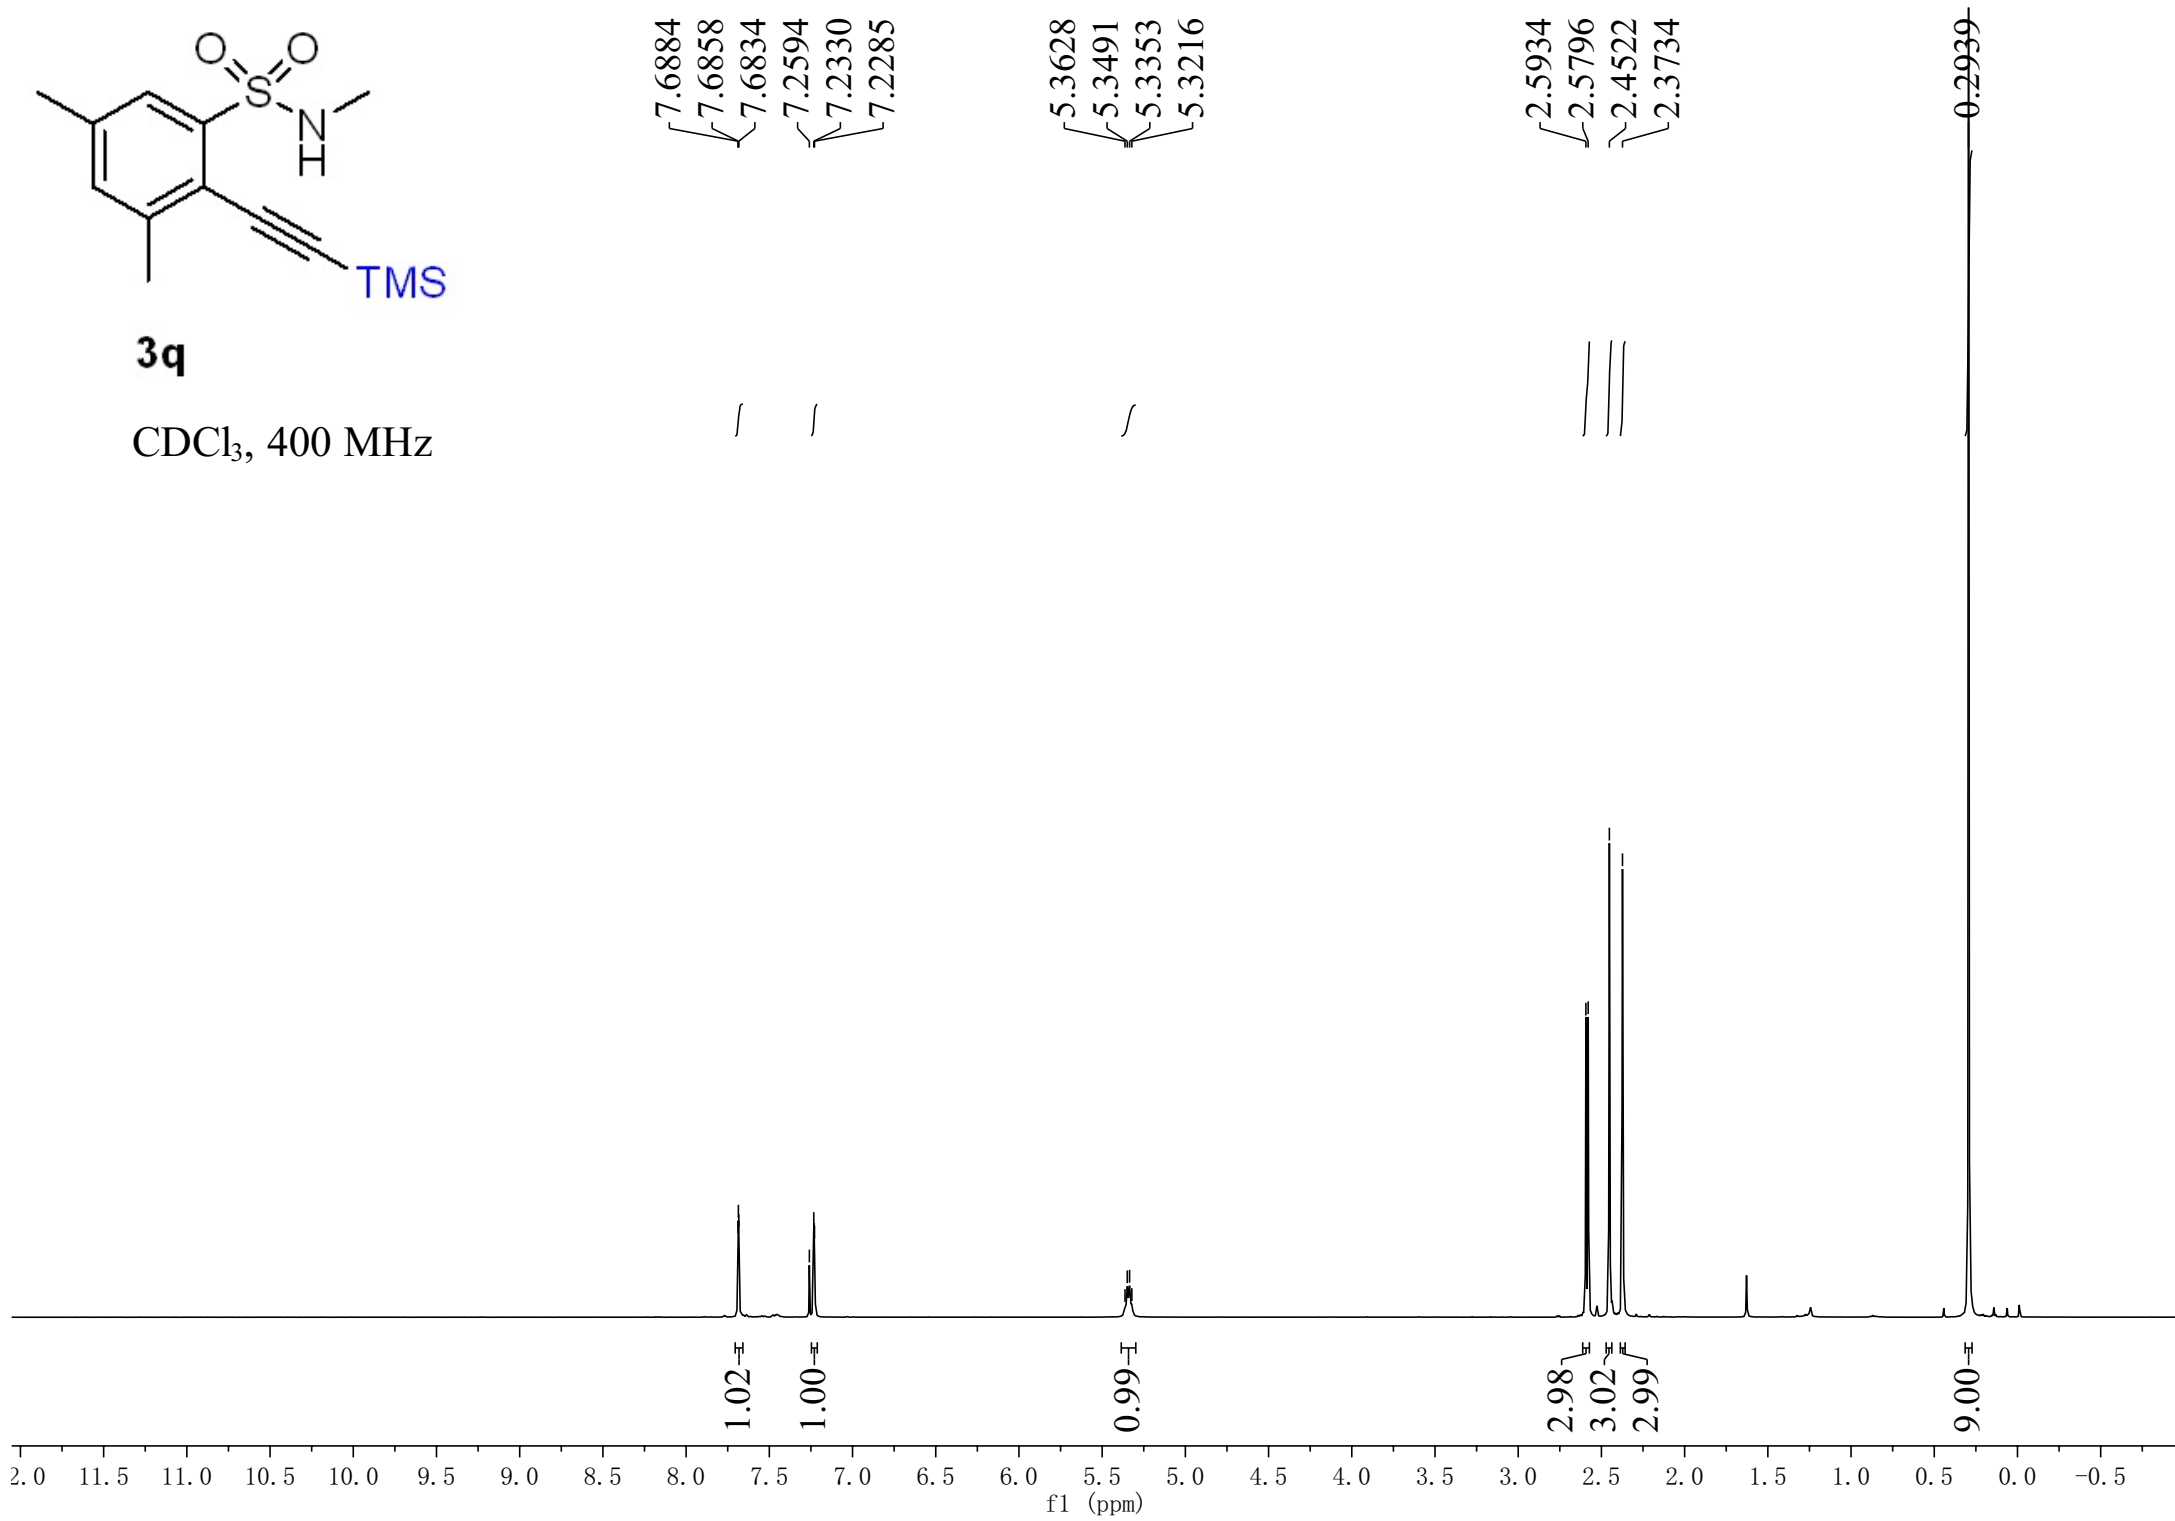

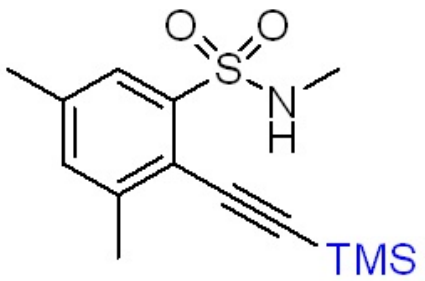

CDCl<sub>3</sub>, 101 MHz

143.25  
139.80  
138.86  
134.17  
127.68  
116.39  
107.38  
100.30  
77.32  
77.00  
76.68  
29.47  
21.35  
20.86  
-0.34

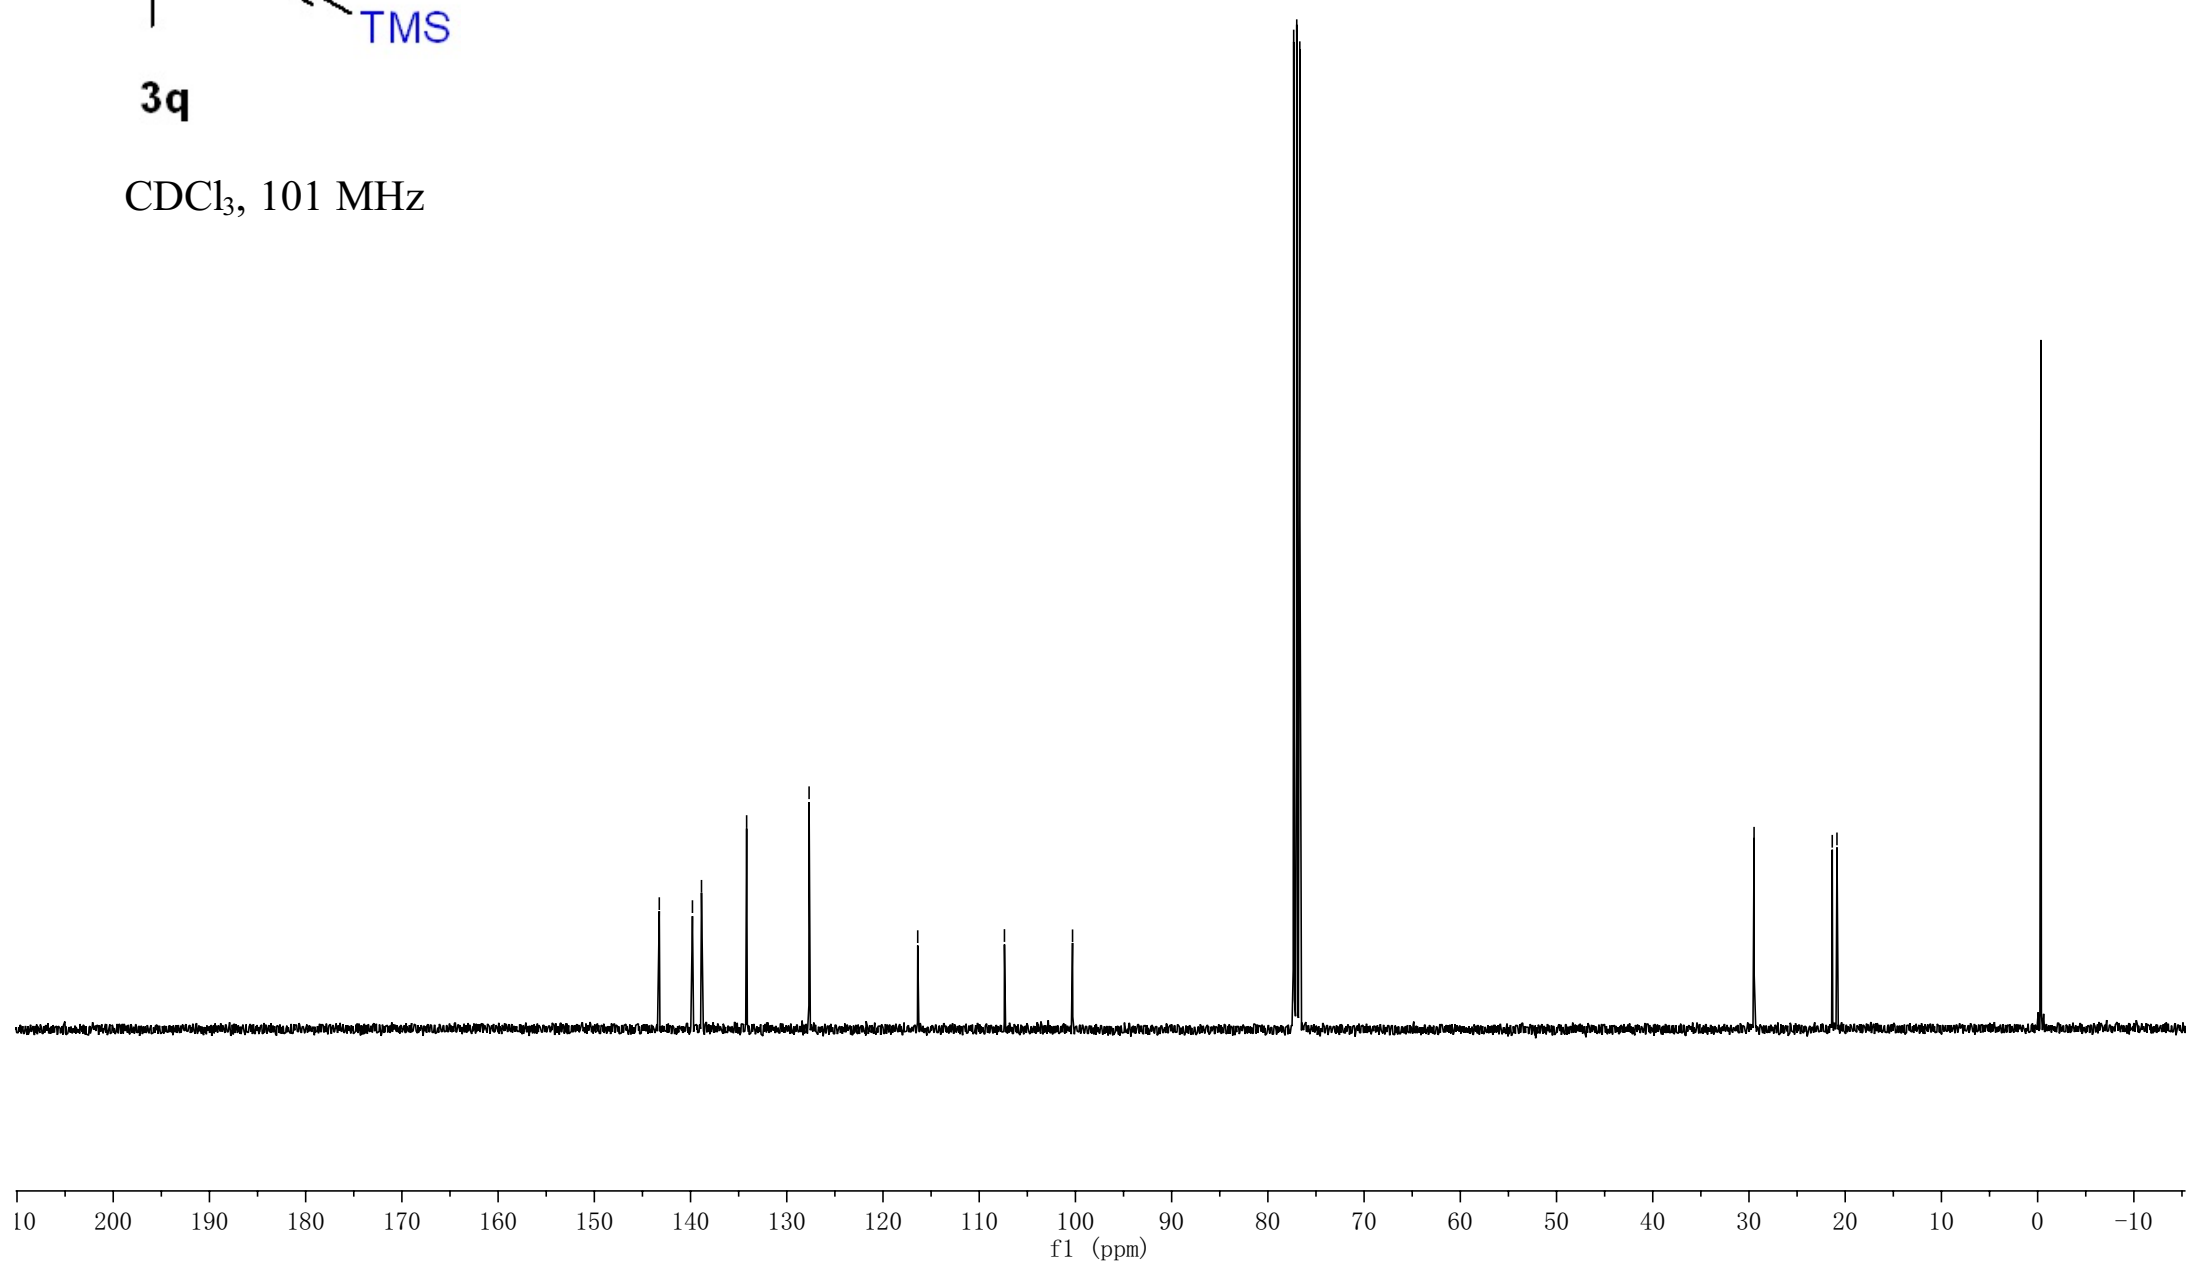

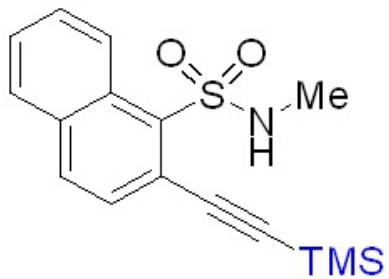

**3r**

CDCl<sub>3</sub>, 400 MHz

9.2154  
9.1933  
7.9328  
7.9116  
7.8549  
7.8347  
7.6678  
7.6646  
7.6508  
7.6466  
7.6286  
7.6215  
7.6003  
7.5898  
7.5728  
7.5697  
5.9172  
5.9031  
5.8893  
5.8760

2.7525  
2.7392

0.3320

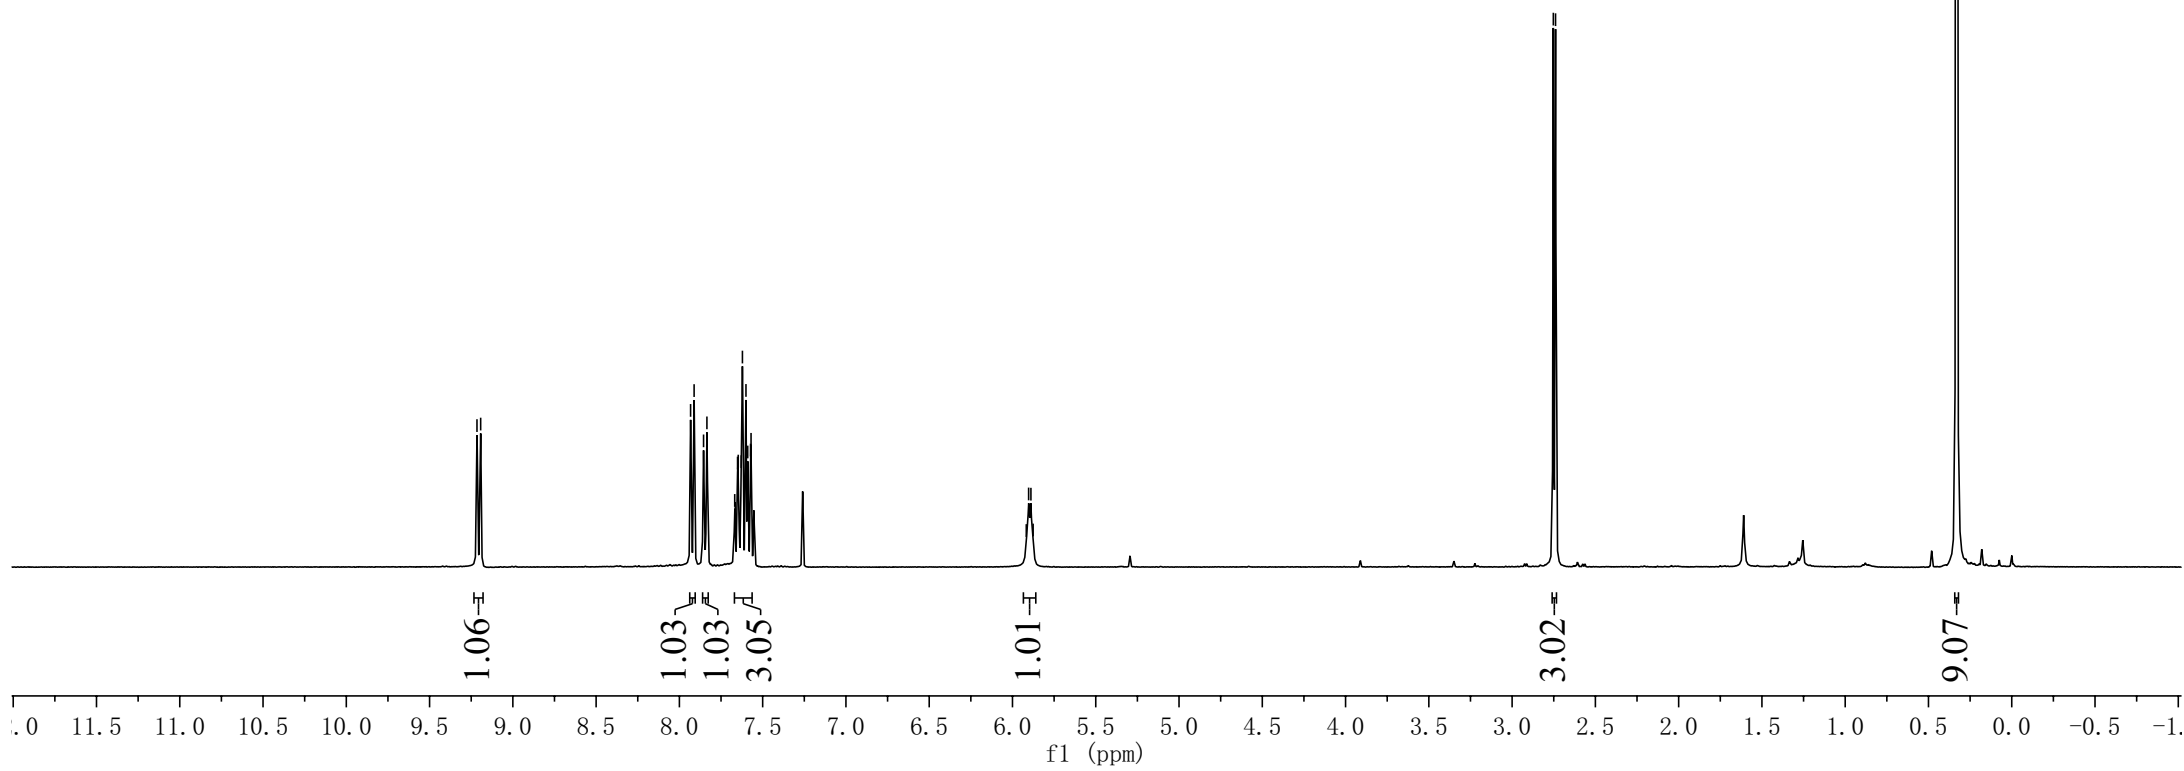

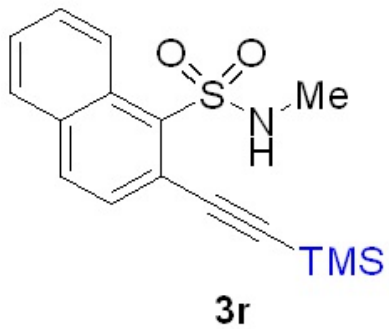

CDCl<sub>3</sub>, 101 MHz

137.87  
133.84  
132.41  
130.30  
130.08  
128.59  
128.51  
127.50  
126.05  
119.84  
105.38  
103.55

77.32  
77.00  
76.68

-29.70

-0.45

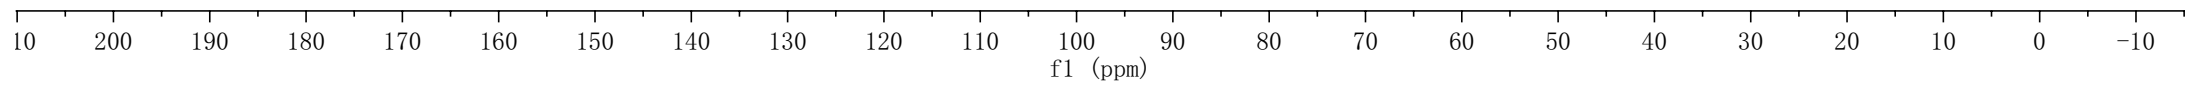

8.0246  
8.0209  
8.0054  
8.0018  
7.6513  
7.6475  
7.6333  
7.6319  
7.6289  
7.5368  
7.5331  
7.5180  
7.5142  
7.4994  
7.4953  
7.4828  
7.4789  
7.4700  
7.4636  
7.4599  
7.4503  
7.4445  
7.4409  
5.2892  
5.2757  
5.2622  
5.2487

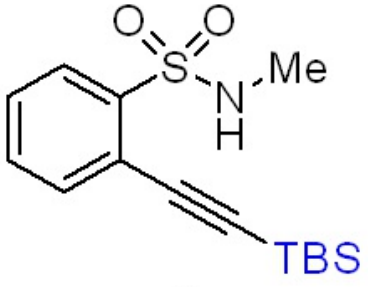

**3s**

CDCl<sub>3</sub>, 400 MHz

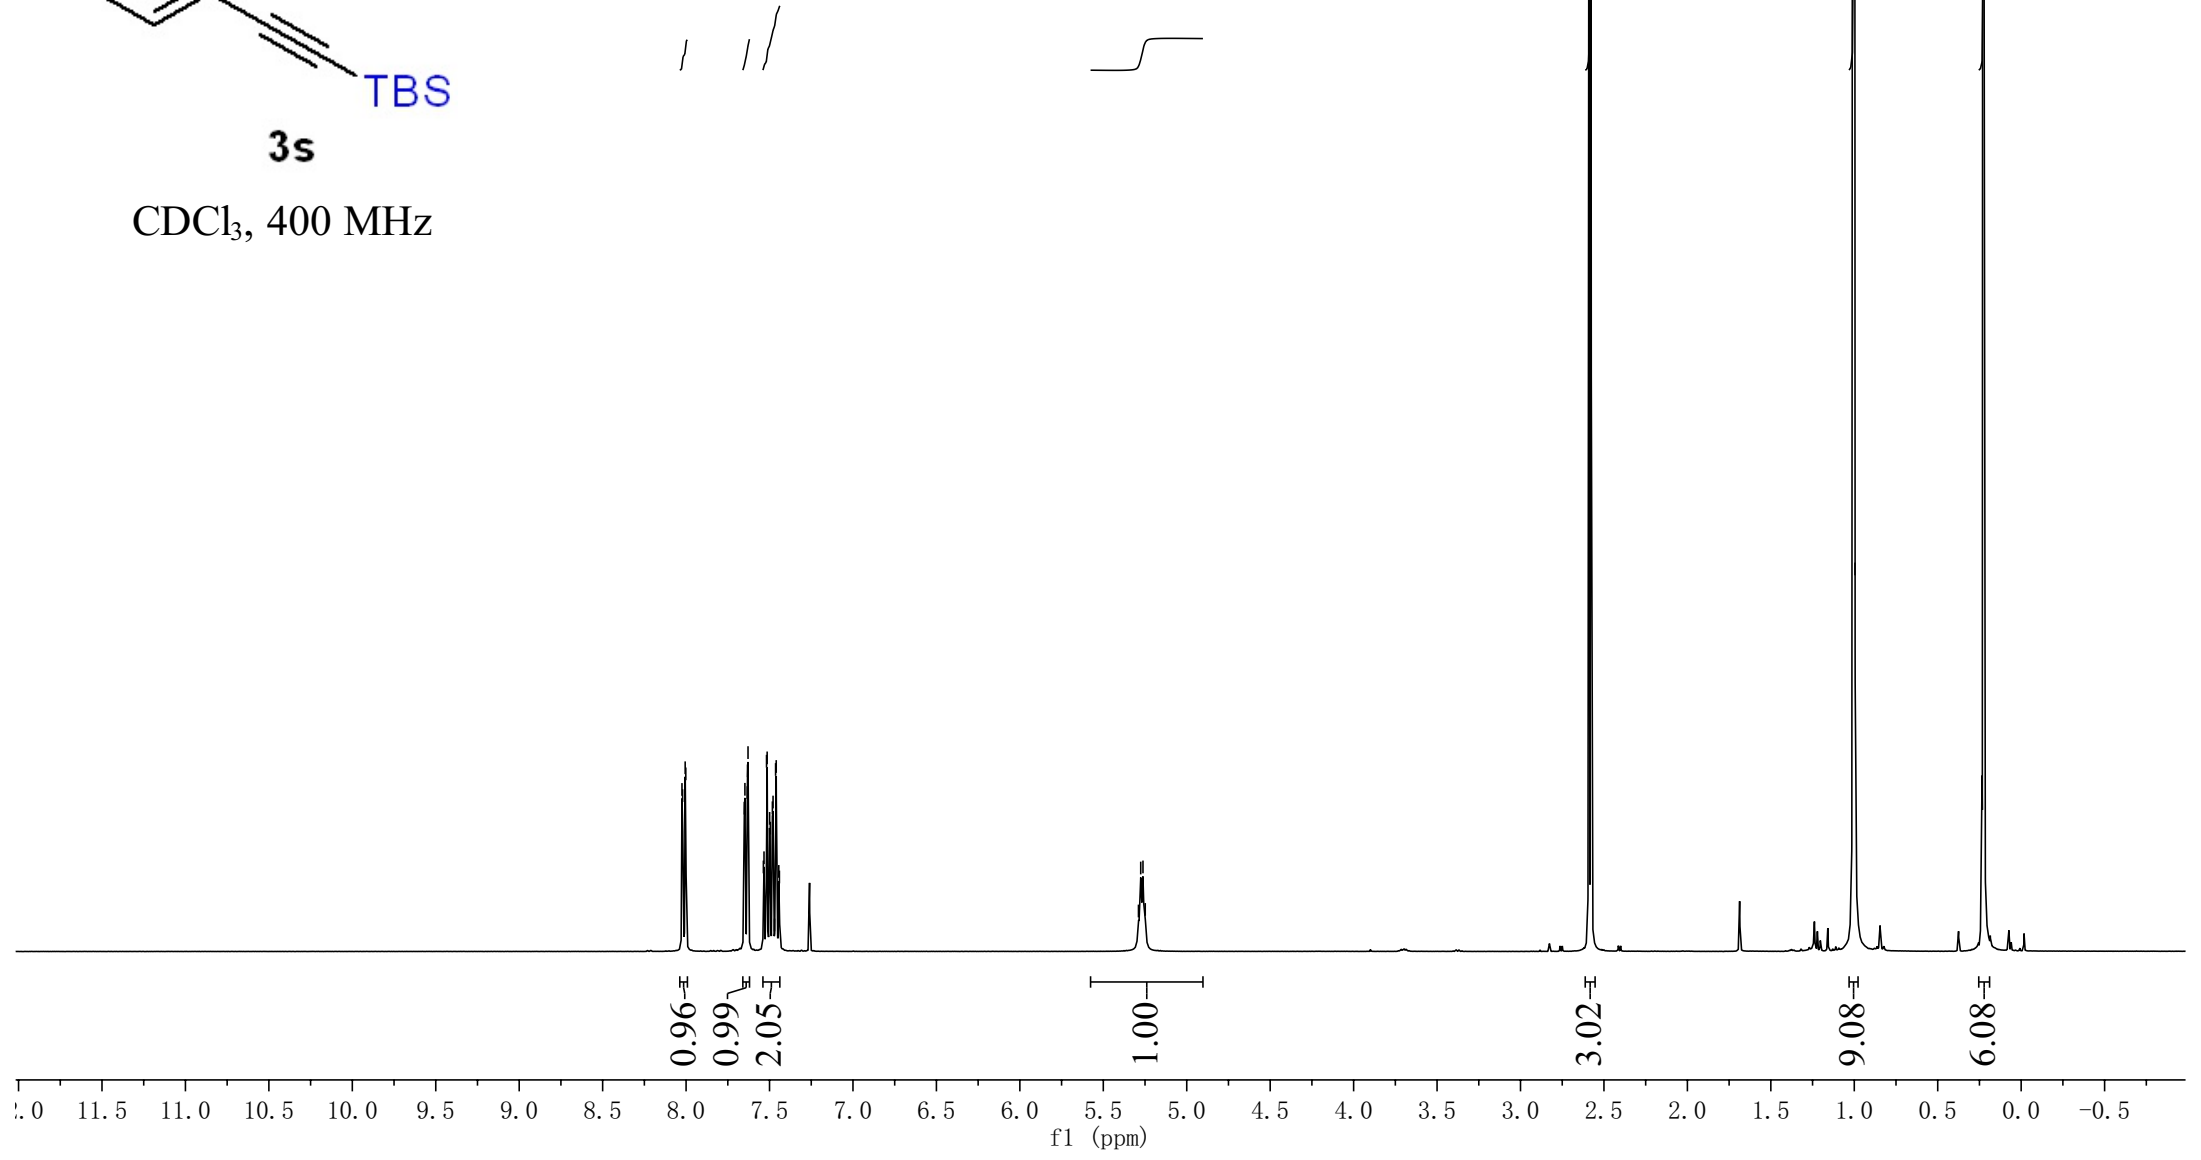

2.5909  
2.5772

1.0038  
0.9959

0.2261

0.96

0.99

2.05

1.00

3.02

9.08

6.08

f1 (ppm)

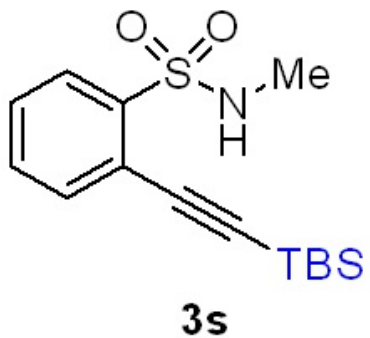

CDCl<sub>3</sub>, 101 MHz

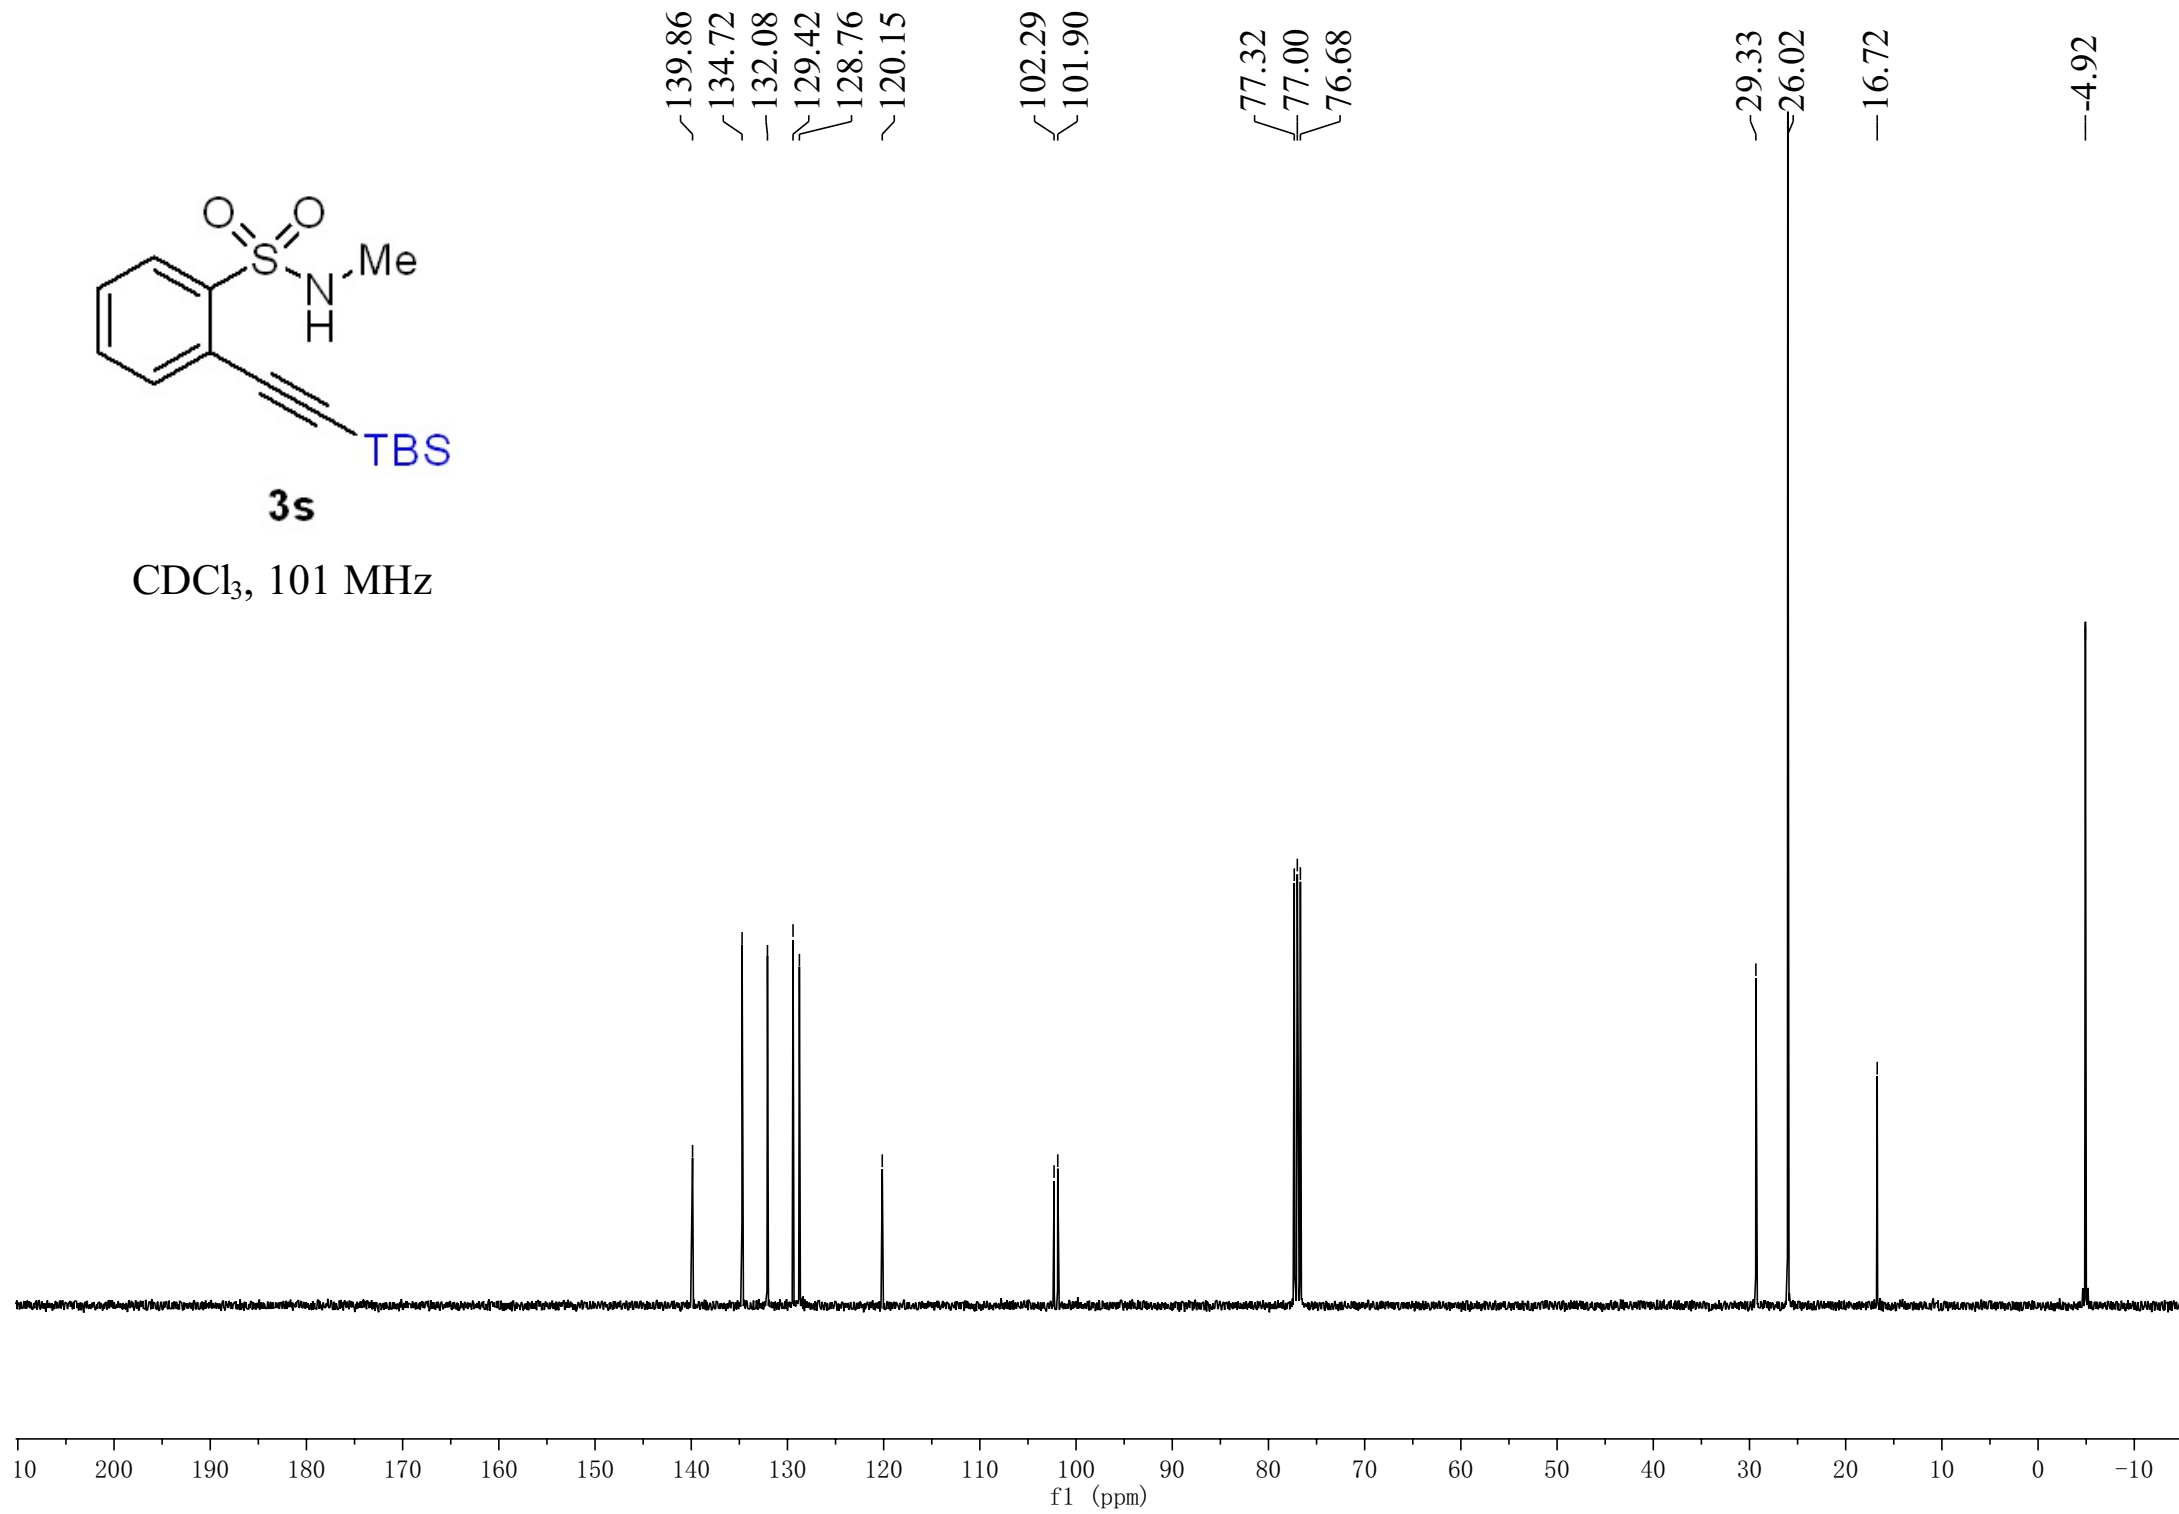

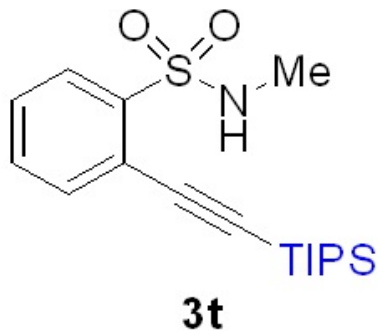

CDCl<sub>3</sub>, 400 MHz

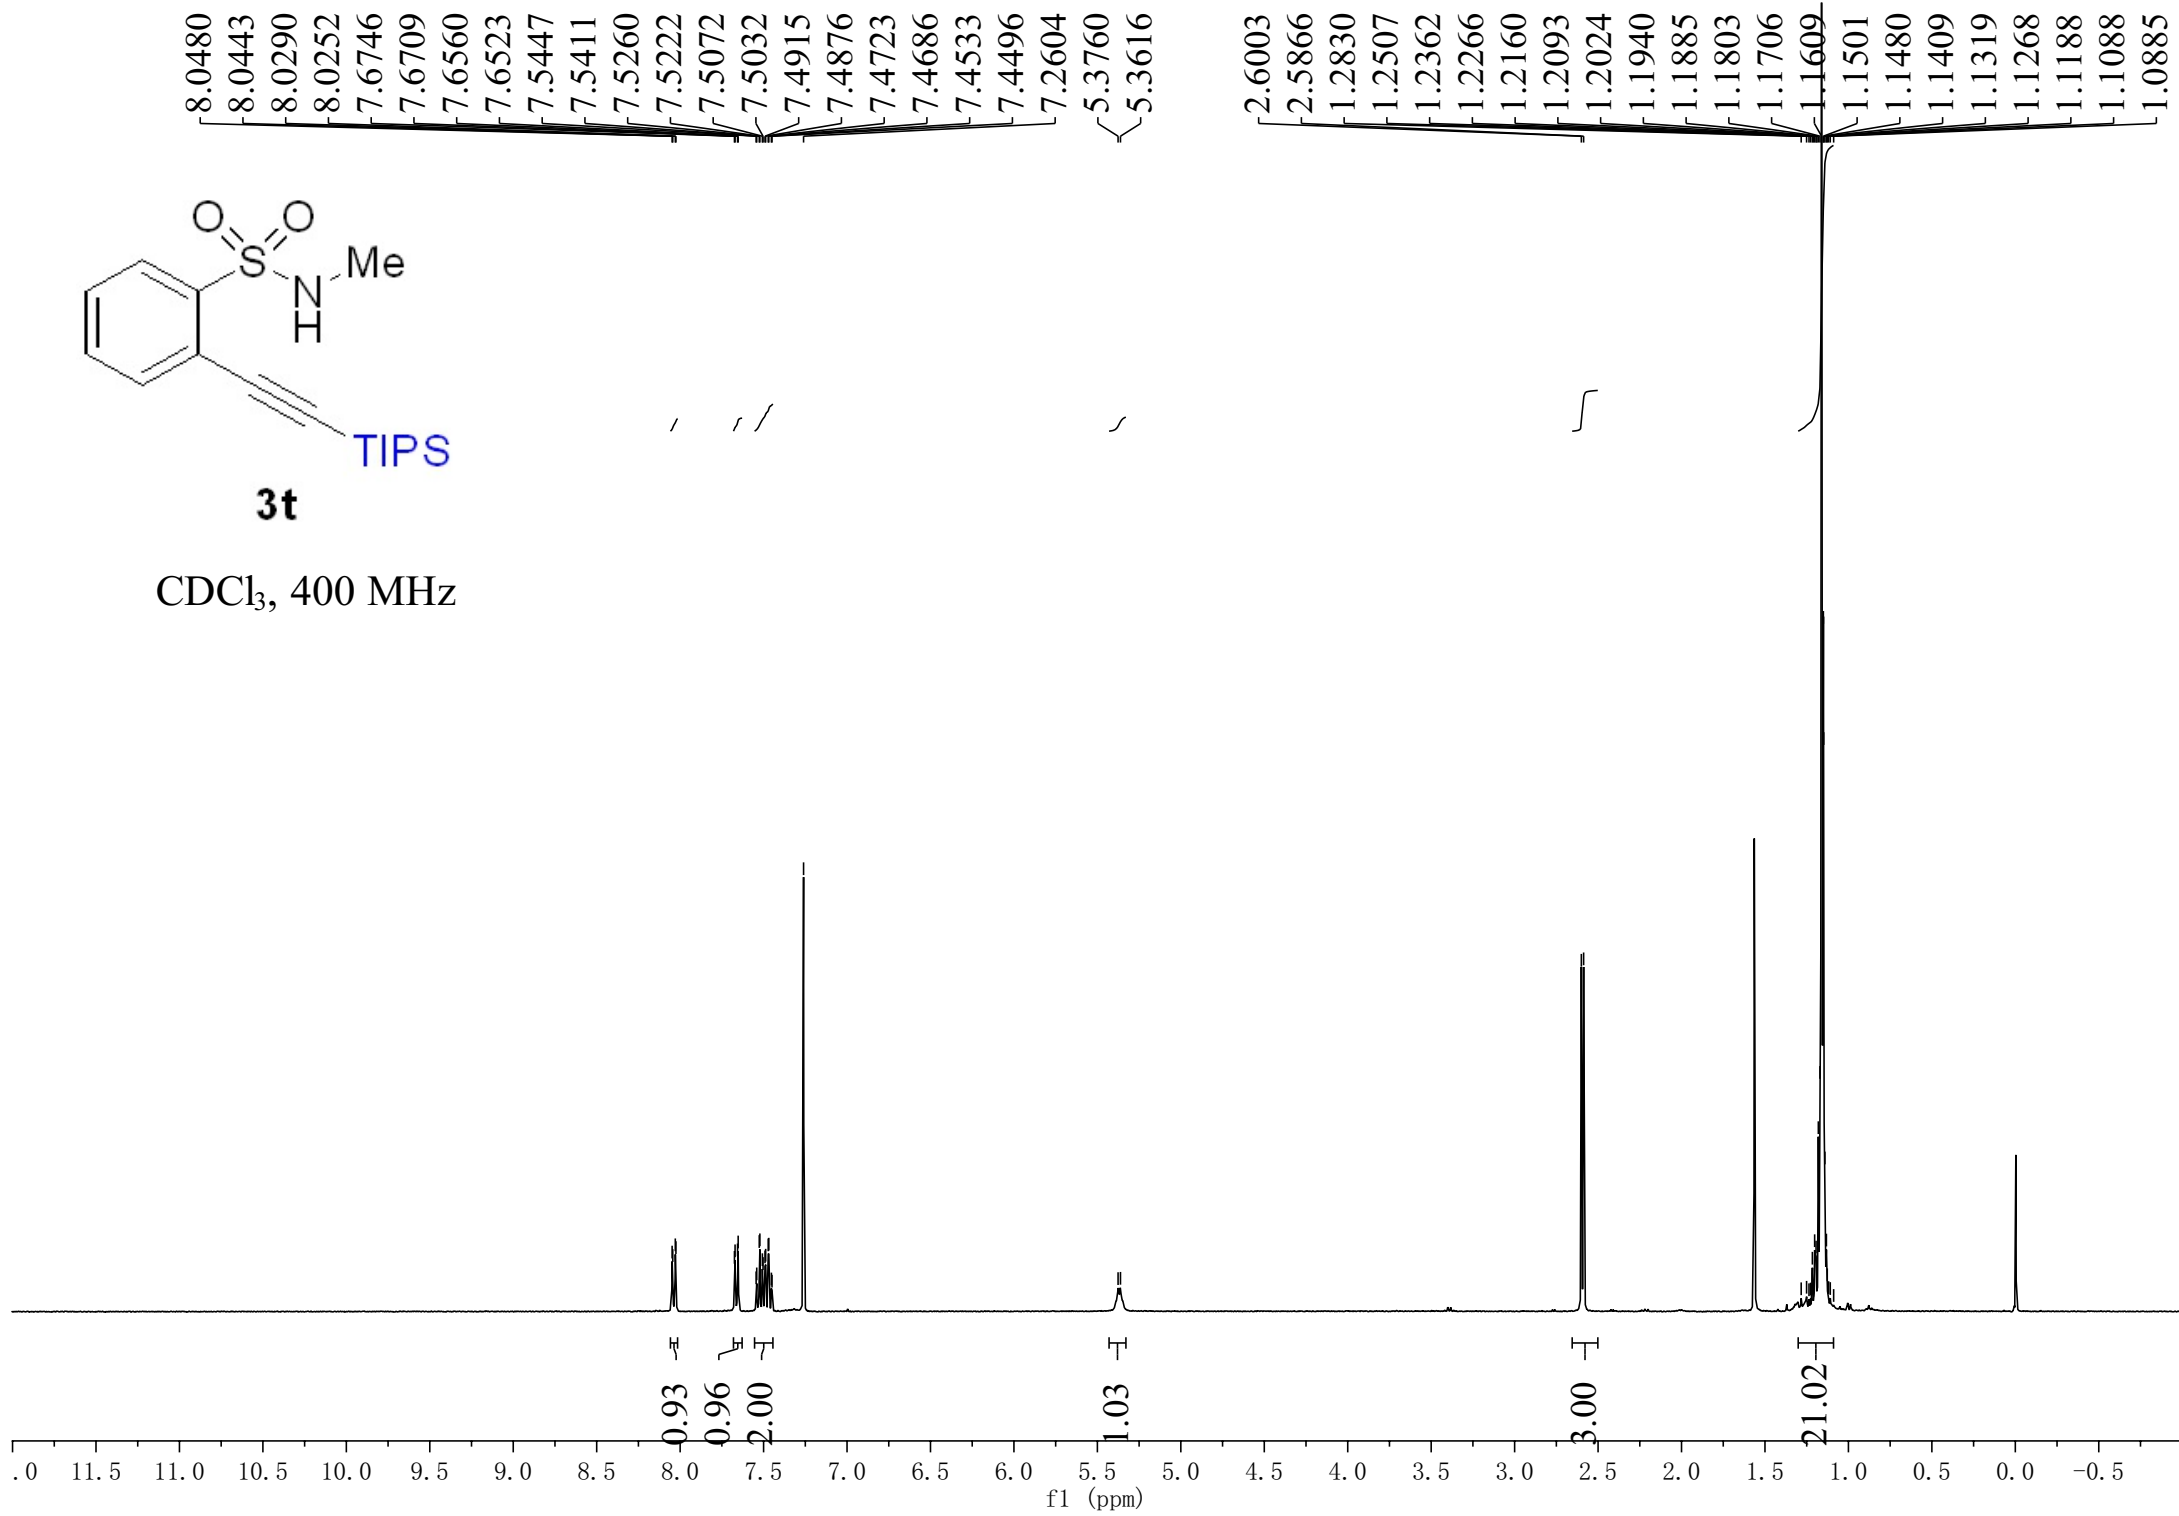



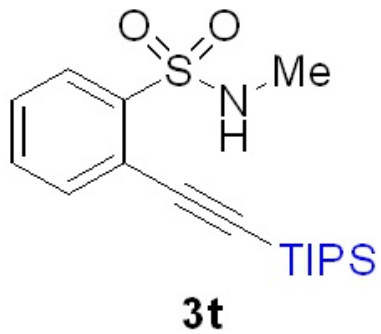

CDCl<sub>3</sub>, 101 MHz

139.69  
135.06  
132.07  
129.45  
128.68  
120.38

103.07  
100.77

77.32  
77.00  
76.68

29.32

18.58

11.26

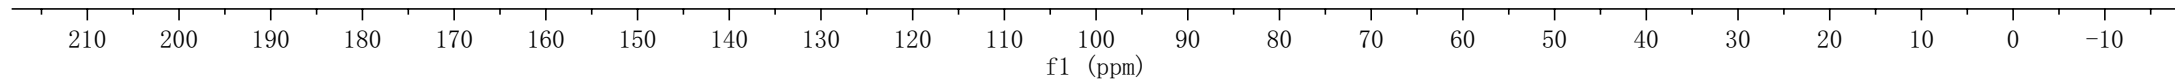

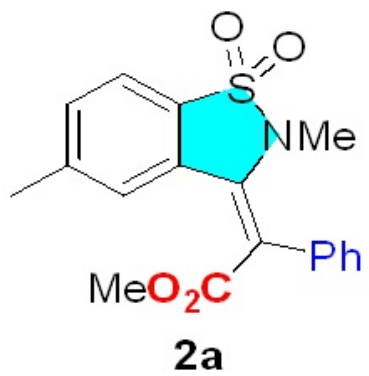

CDCl<sub>3</sub>, 400 MHz

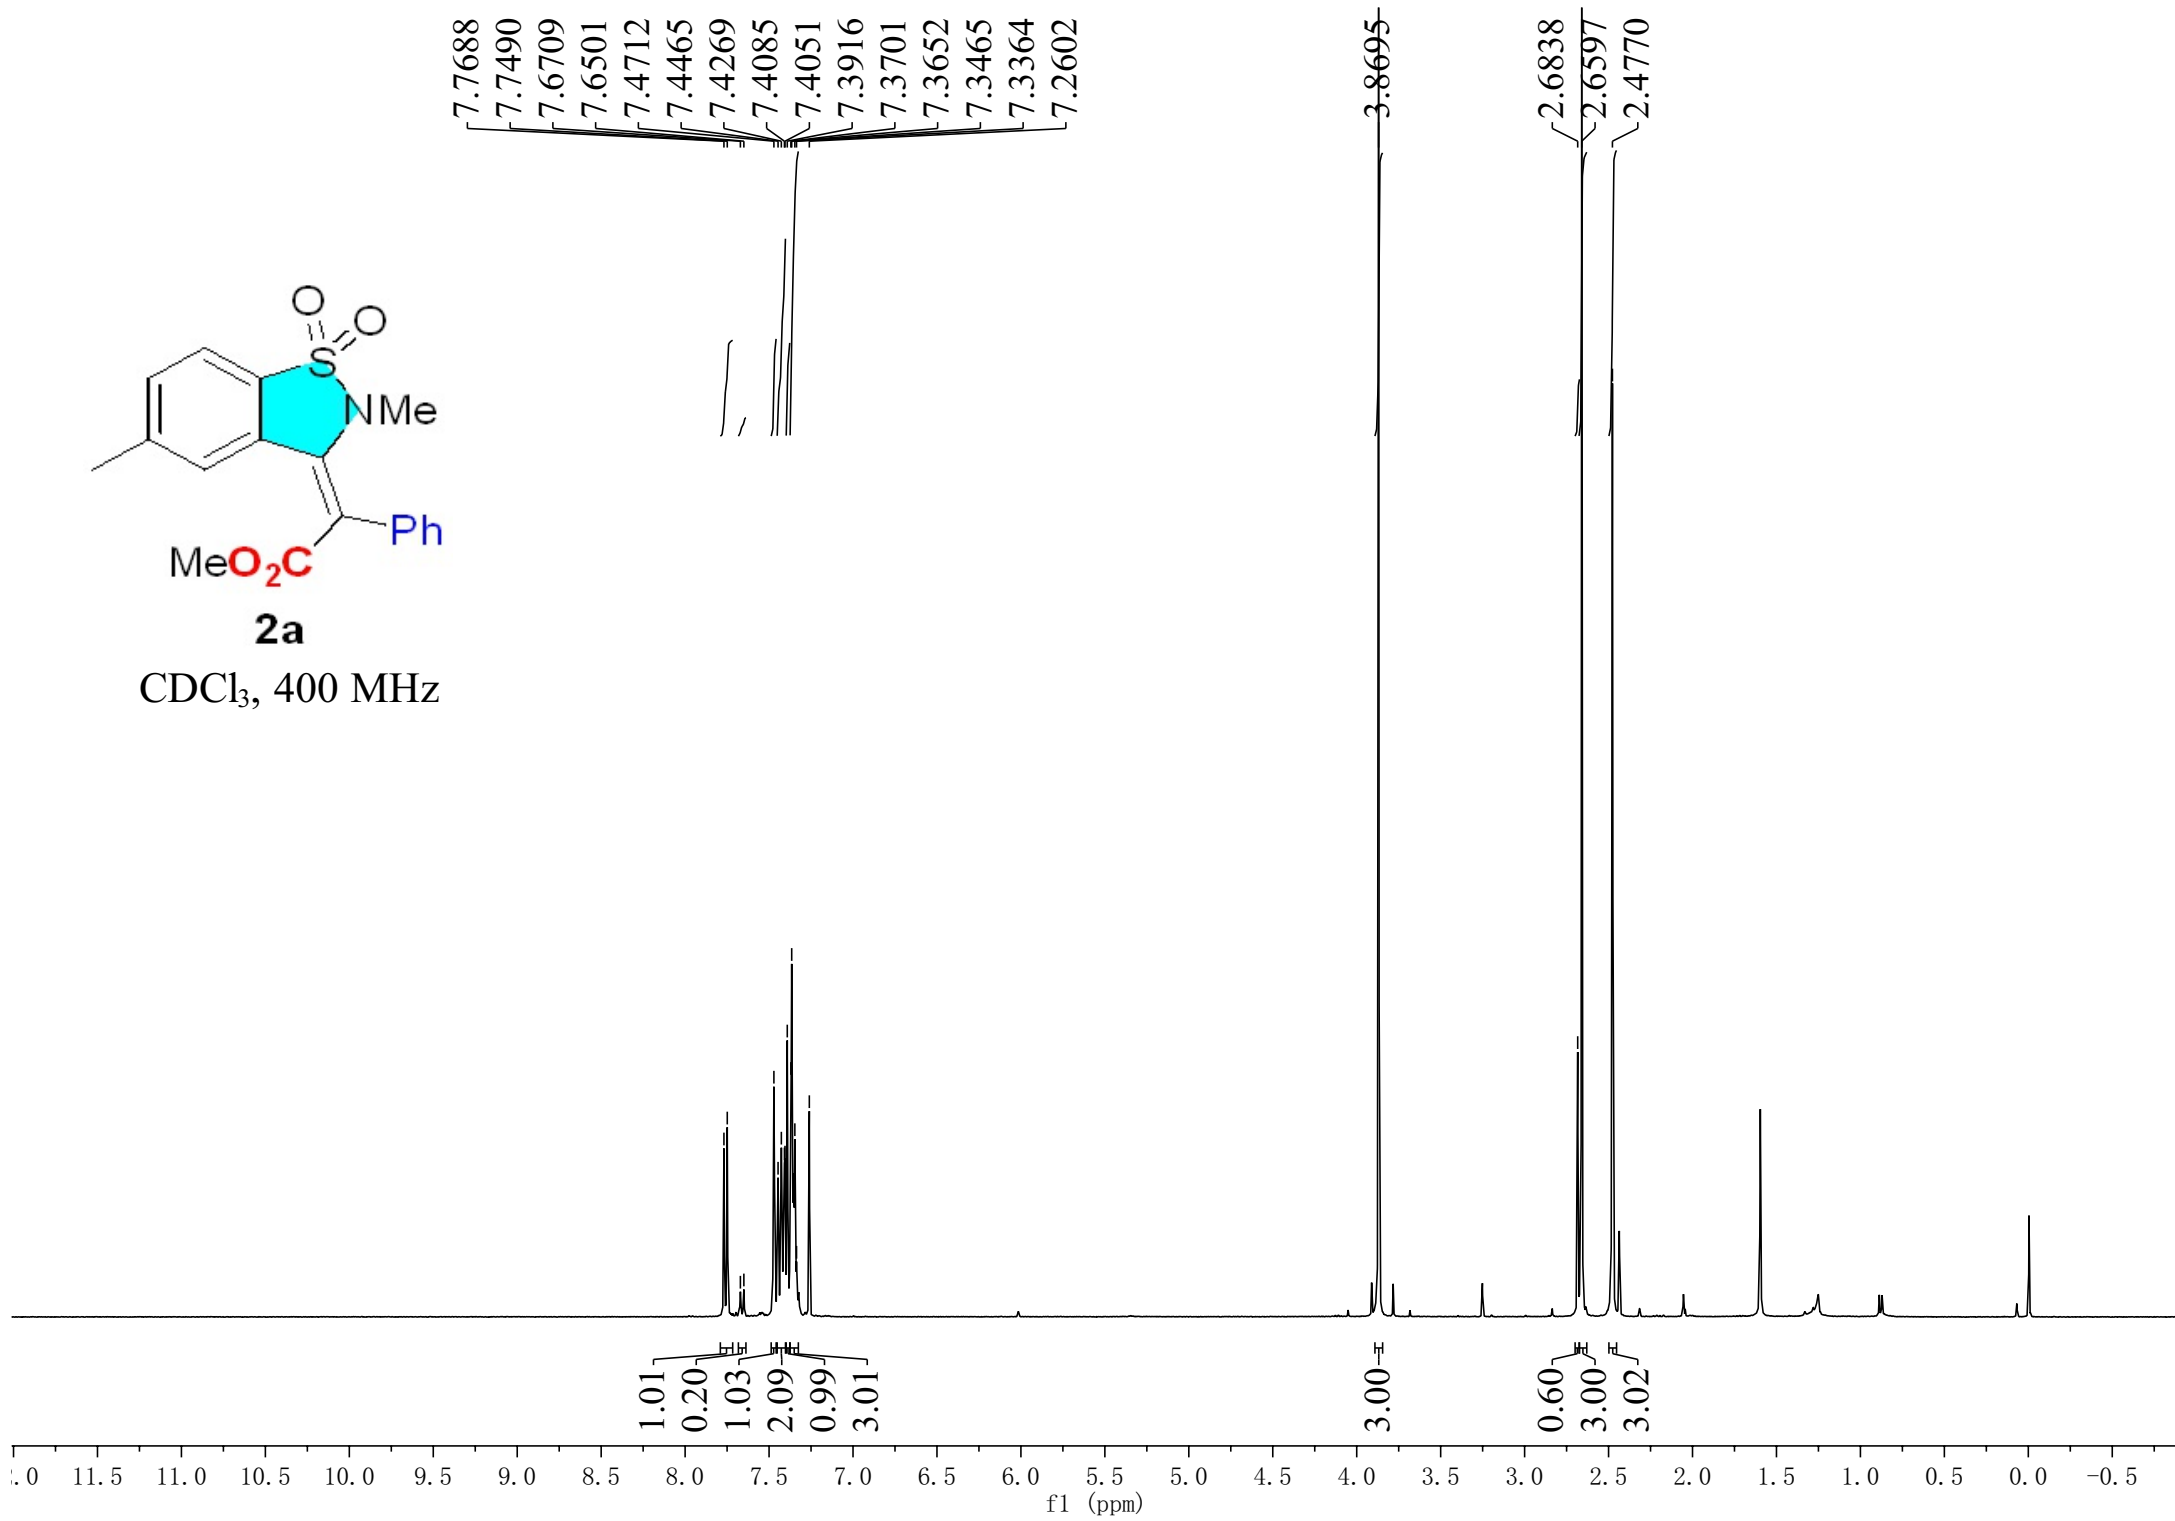



CDCl<sub>3</sub>, 101 MHz

—169.61

144.06  
137.46  
134.85  
131.93  
130.34  
129.83  
128.69  
128.53  
127.77  
124.67  
121.18  
113.30

77.32  
77.00  
76.68

—52.97

—31.83

—22.22

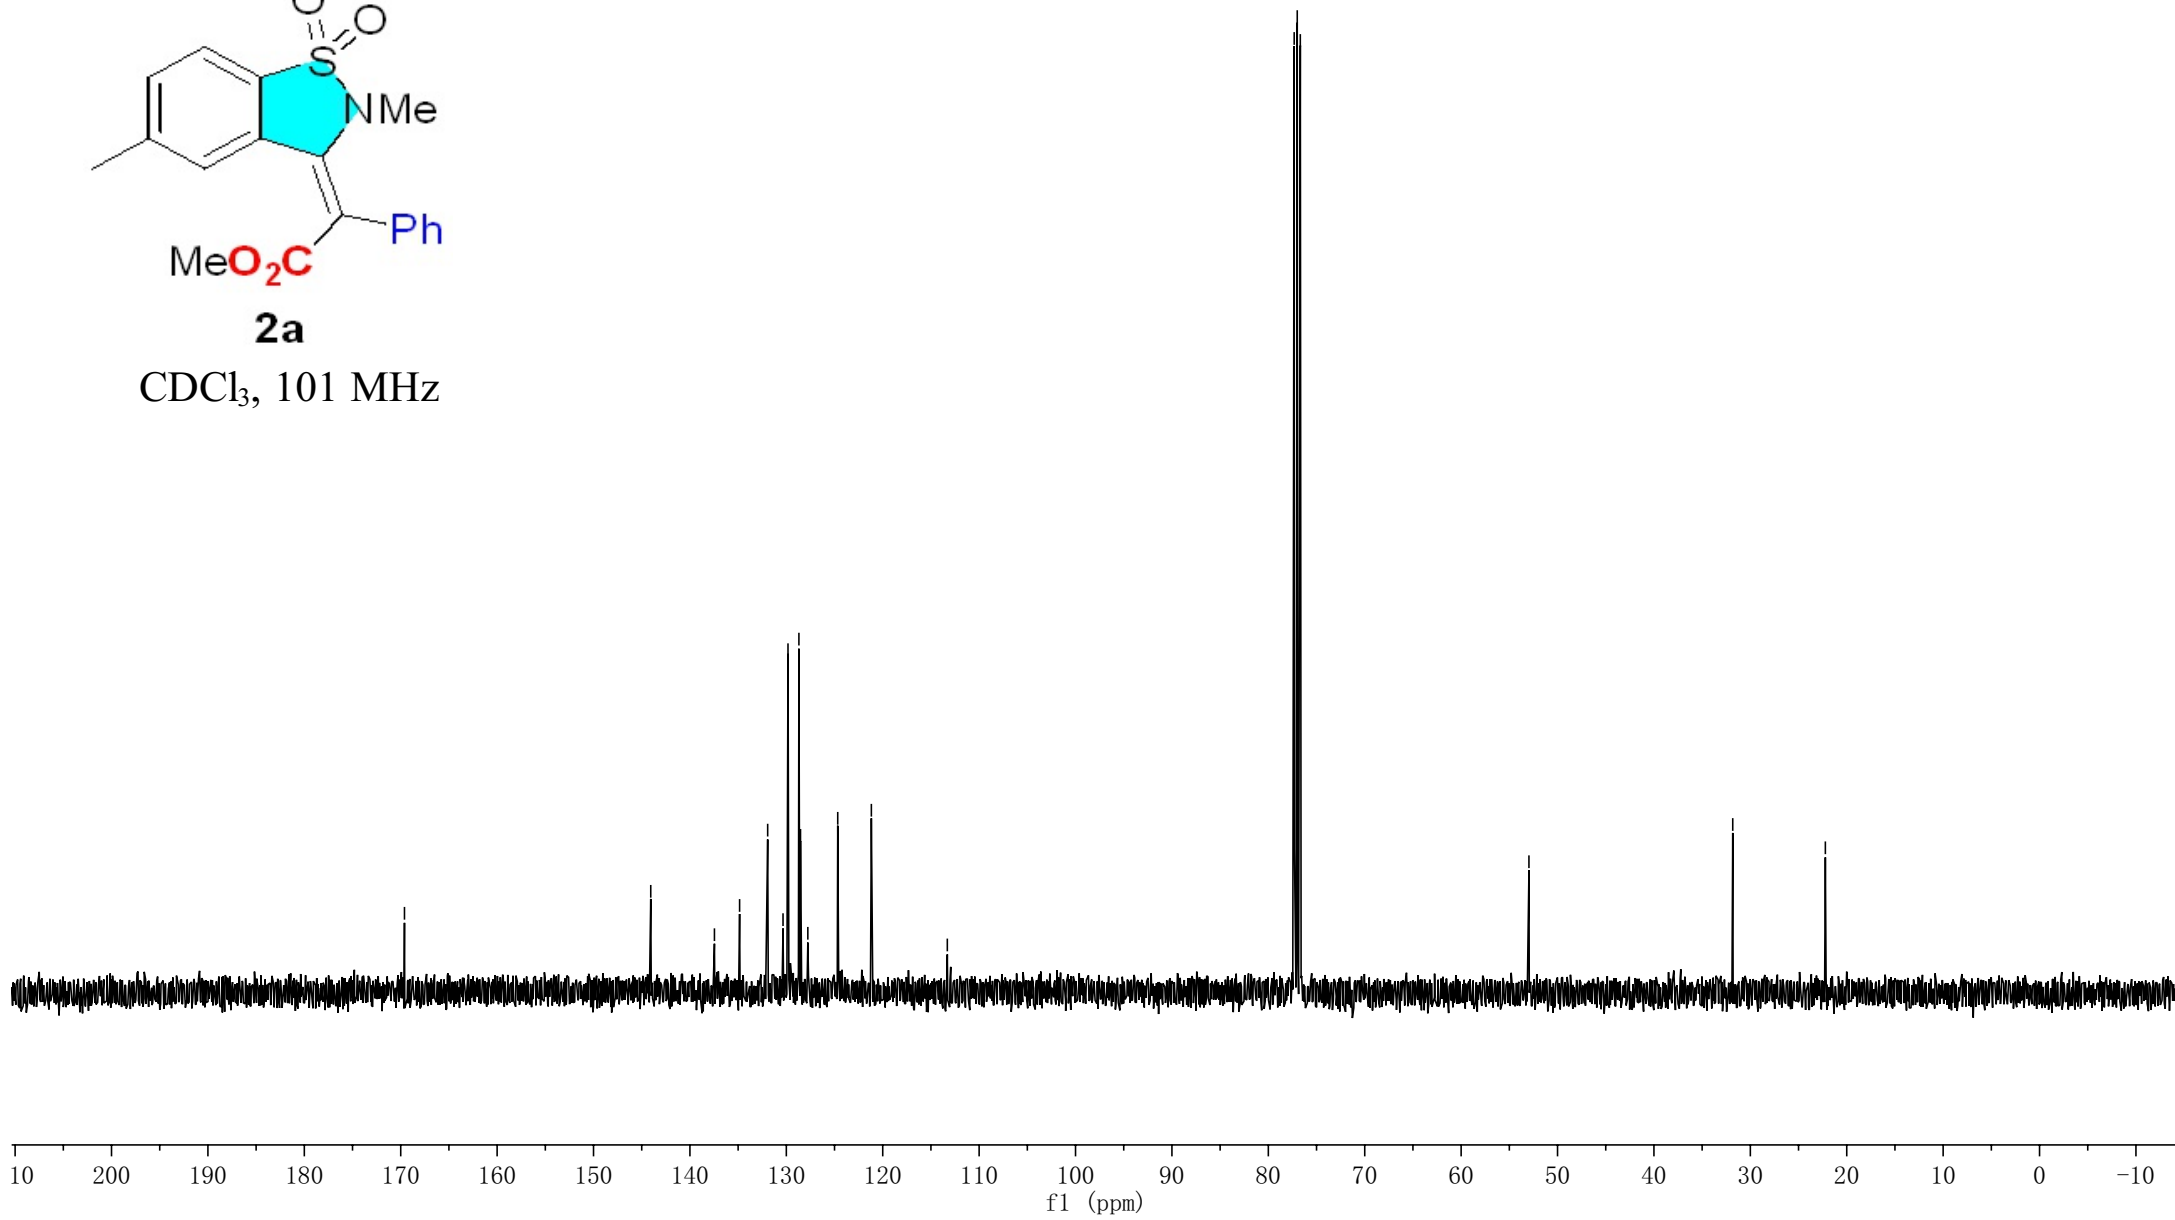

7.8161  
7.7963  
7.4471  
7.4271  
7.3954  
7.3198  
7.3121  
7.3081  
7.3020  
7.2984  
7.2940  
7.2854  
7.2809  
7.1930  
7.1886  
7.1748  
7.1688  
7.1570  
7.1441  
7.1398  
7.1318  
7.1276  
7.1132  
7.0969  
6.7525  
6.7358  
5.1759

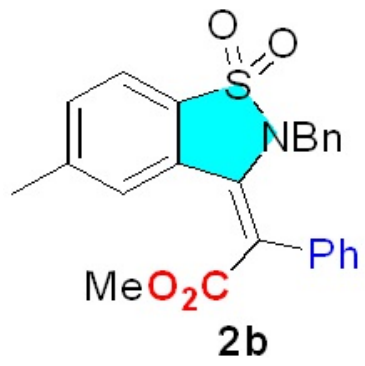

CDCl<sub>3</sub>, 400 MHz

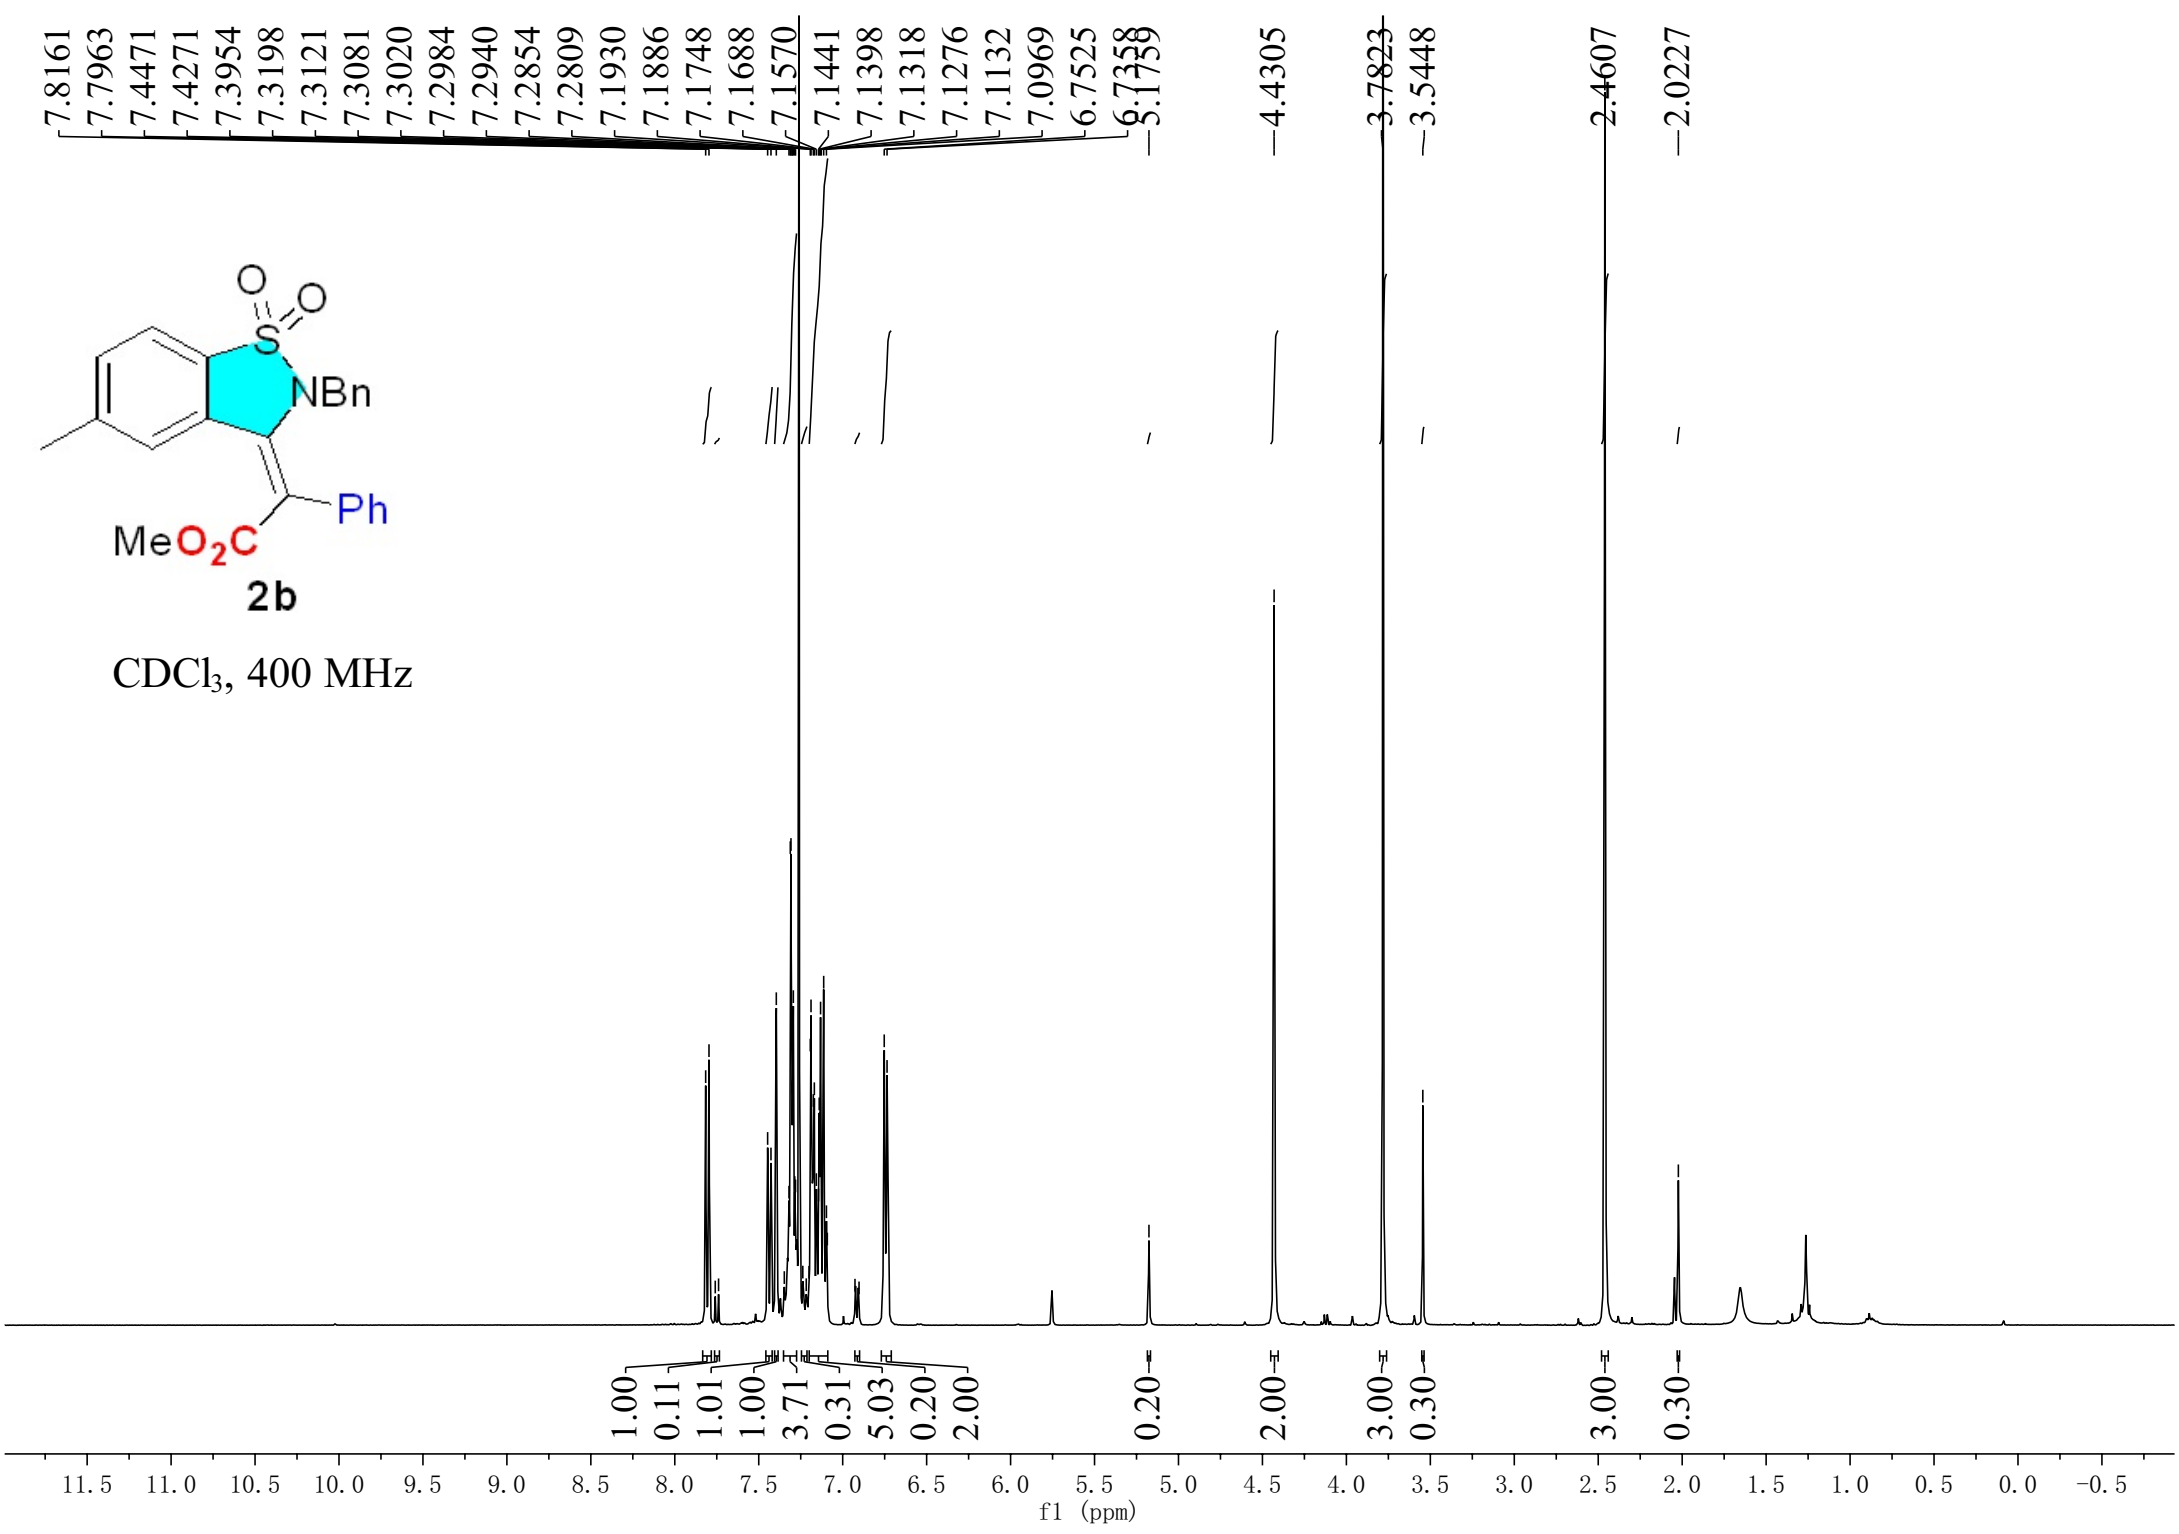

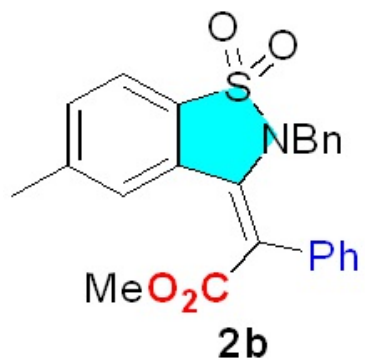

CDCl<sub>3</sub>, 101 MHz

169.02  
143.99  
143.53  
134.63  
134.06  
133.91  
131.73  
131.53  
131.19  
130.44  
129.79  
129.13  
128.66  
128.40  
127.95  
127.91  
127.32  
127.04  
124.33  
121.17  
120.99  
116.40  
77.32  
77.00  
76.68  
52.85  
52.15  
47.93  
46.73  
22.17  
21.69

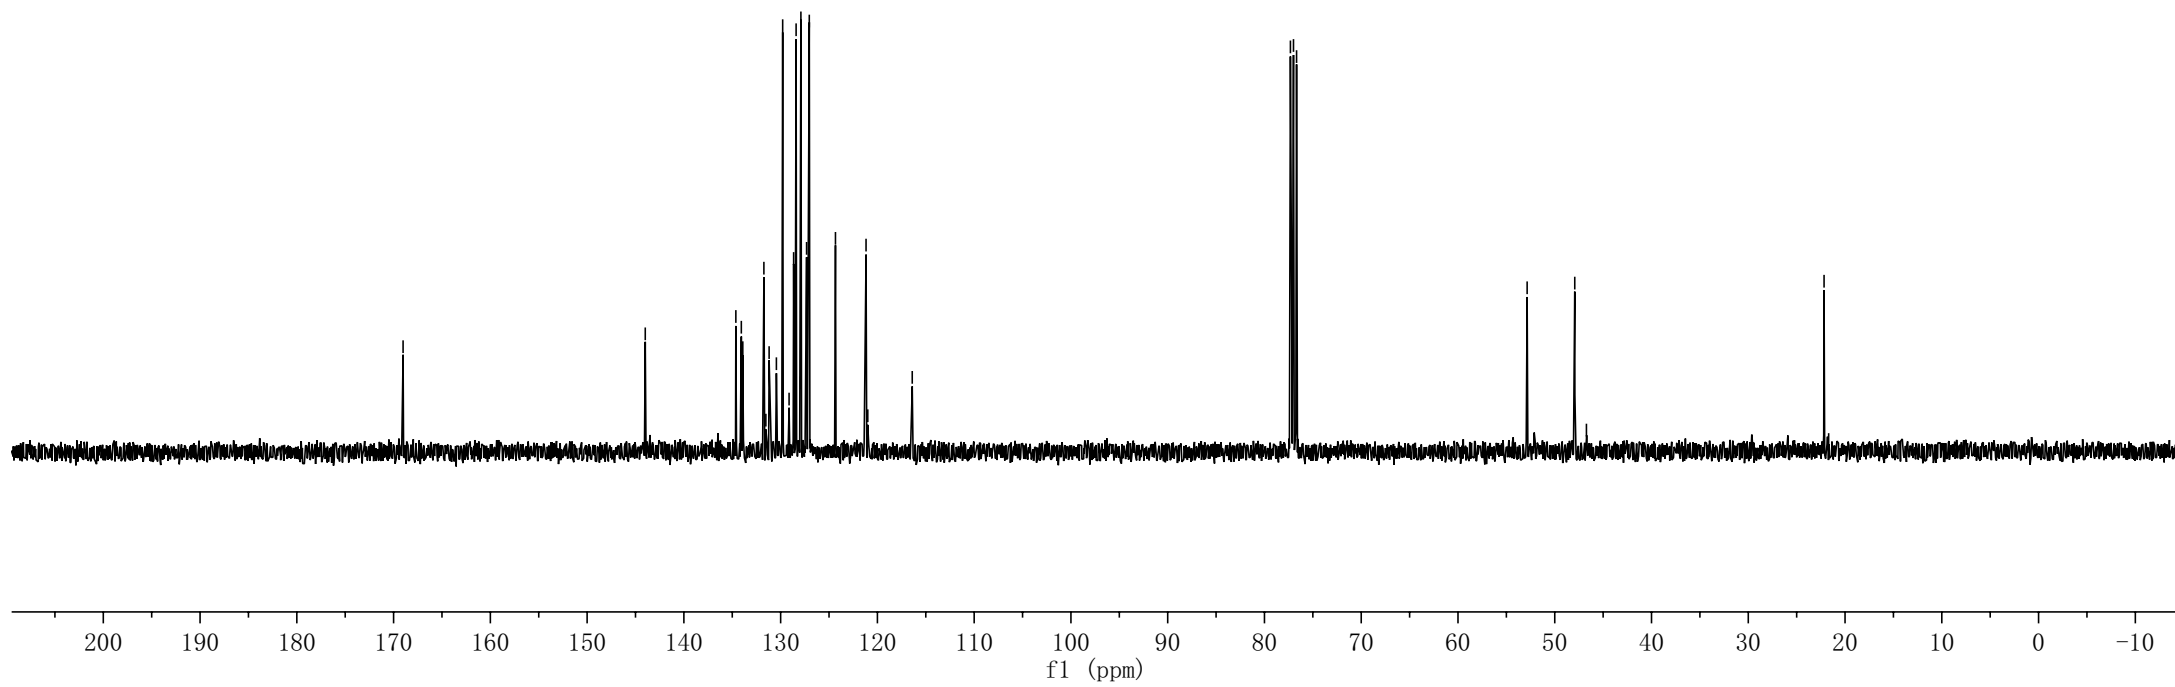

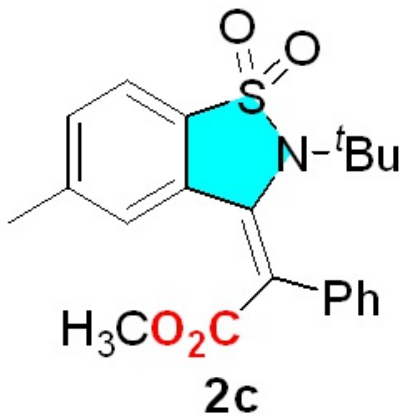

CDCl<sub>3</sub>, 400 MHz

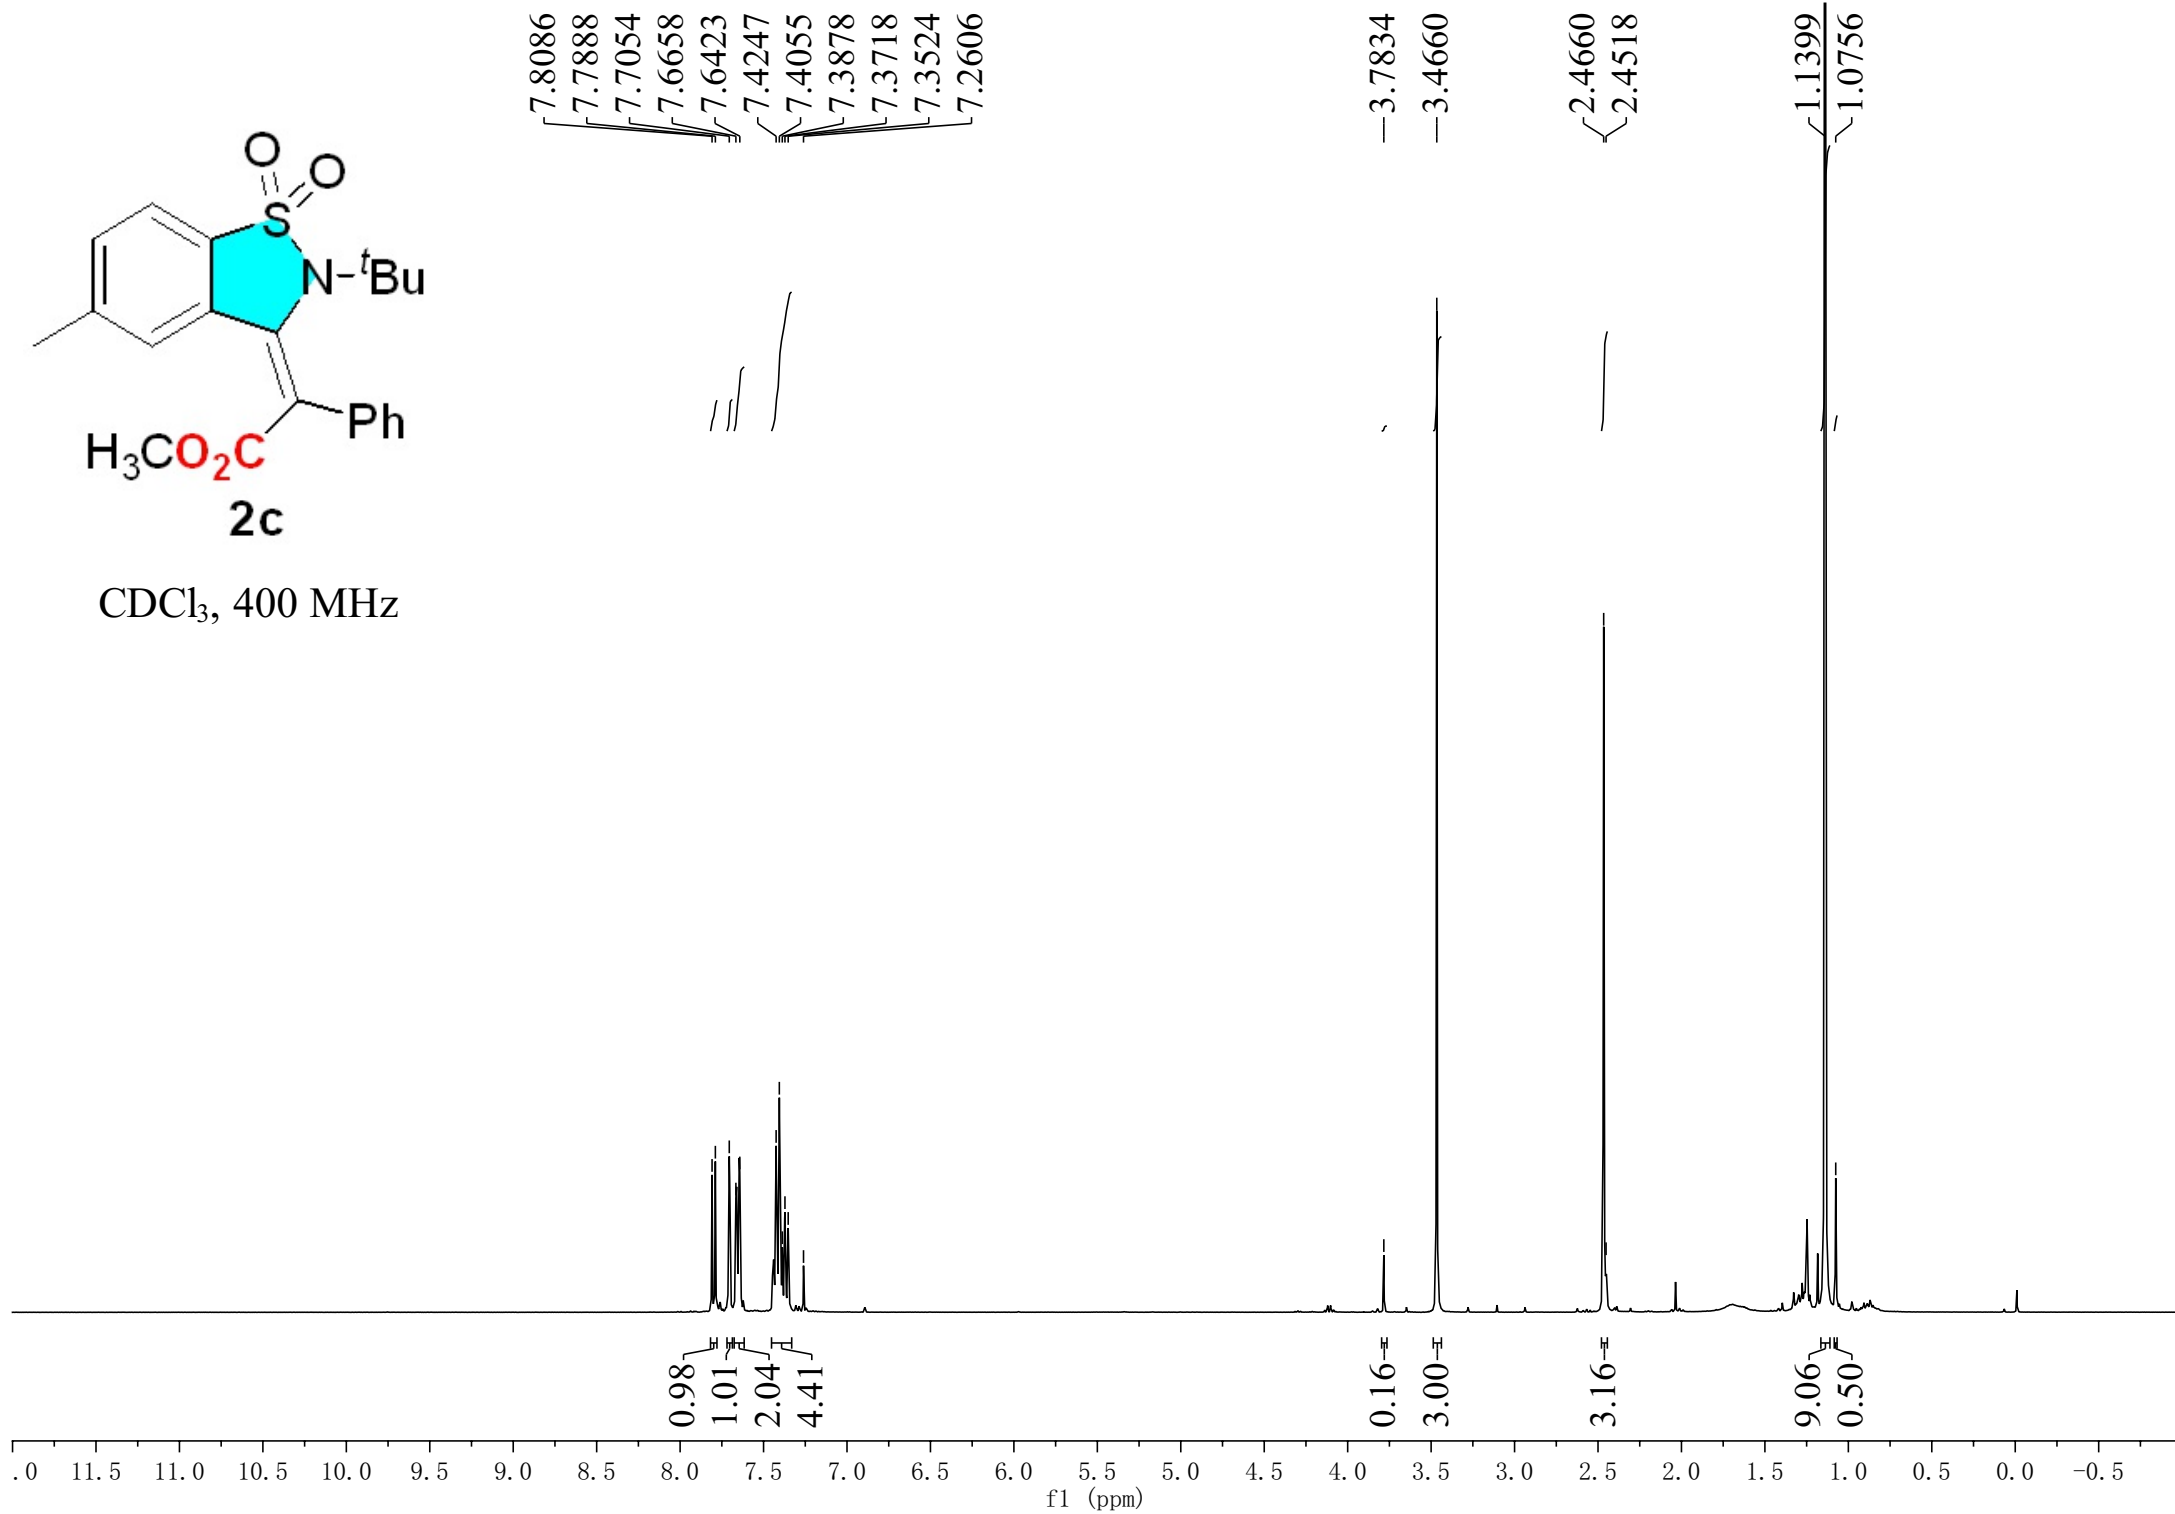

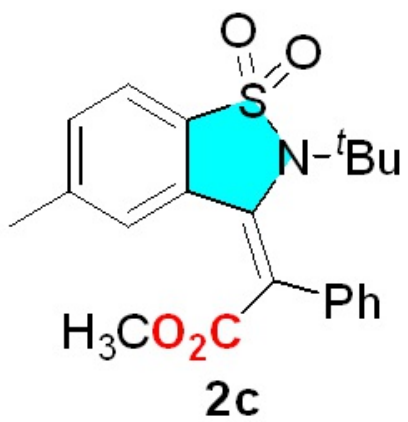

CDCl<sub>3</sub>, 101 MHz

168.25  
143.12  
142.82  
139.03  
133.71  
130.06  
129.94  
129.56  
128.56  
128.13  
126.65  
124.40  
122.58

77.39  
77.07  
76.75  
65.46  
52.59  
30.81  
21.92

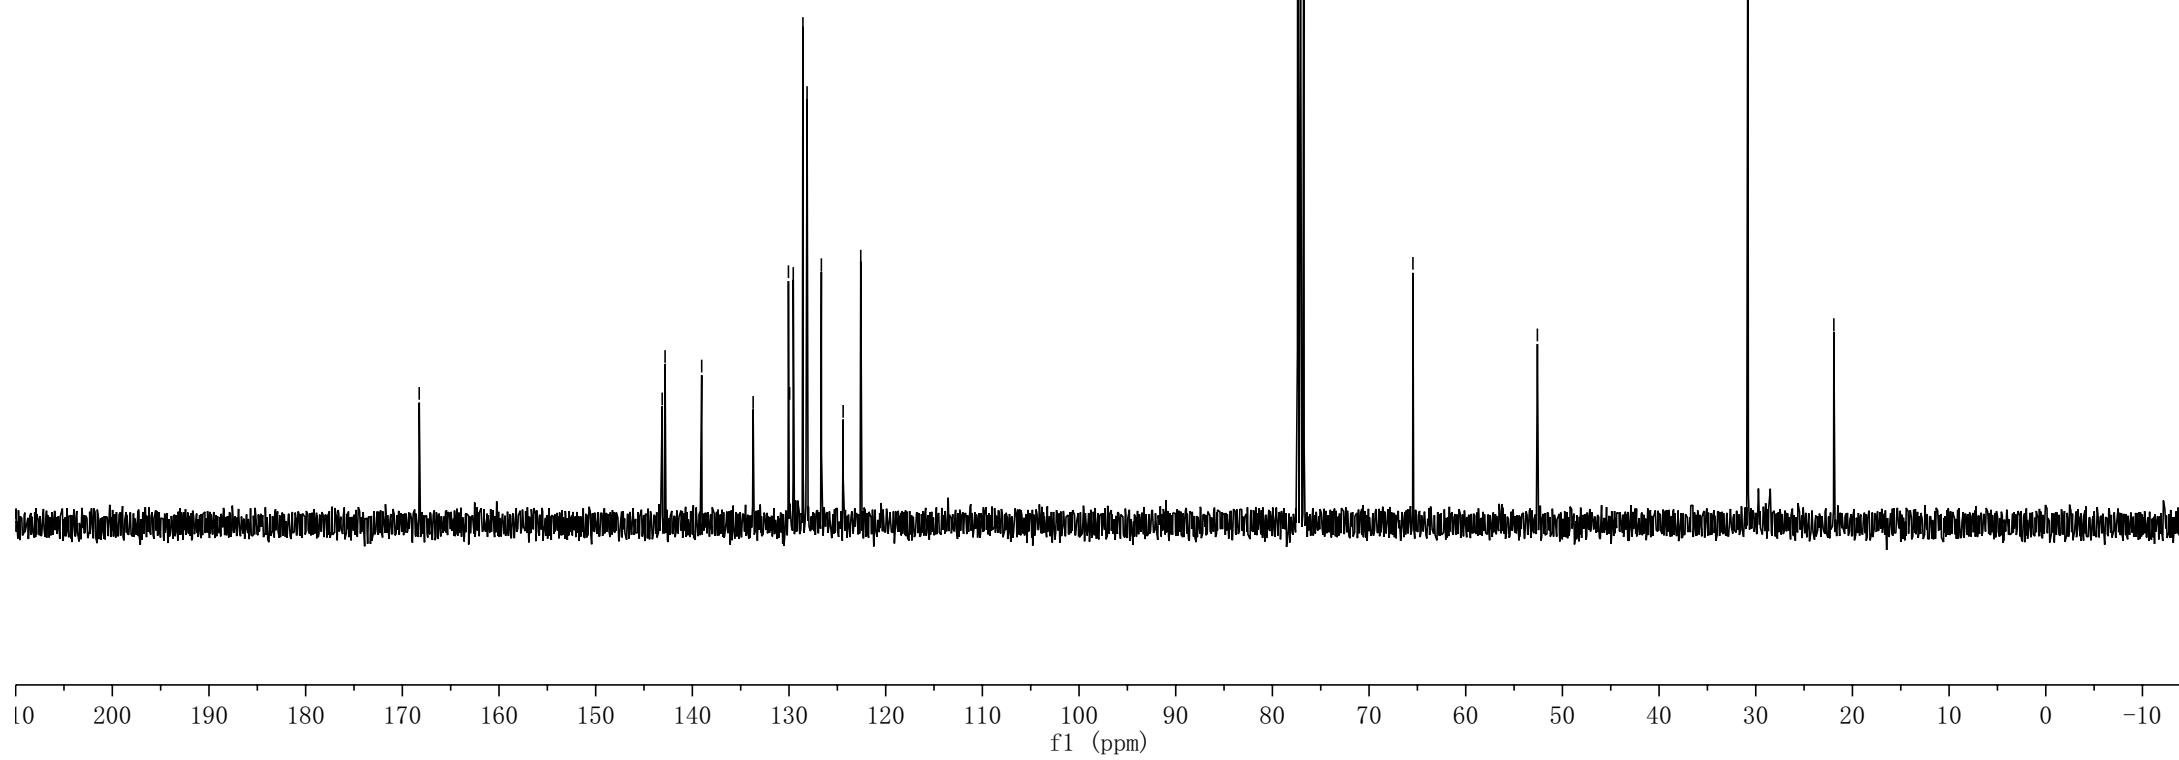

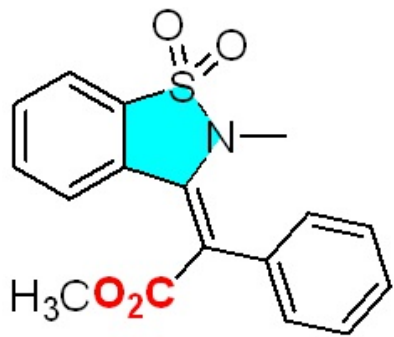

**2f**

CDCl<sub>3</sub>, 400 MHz

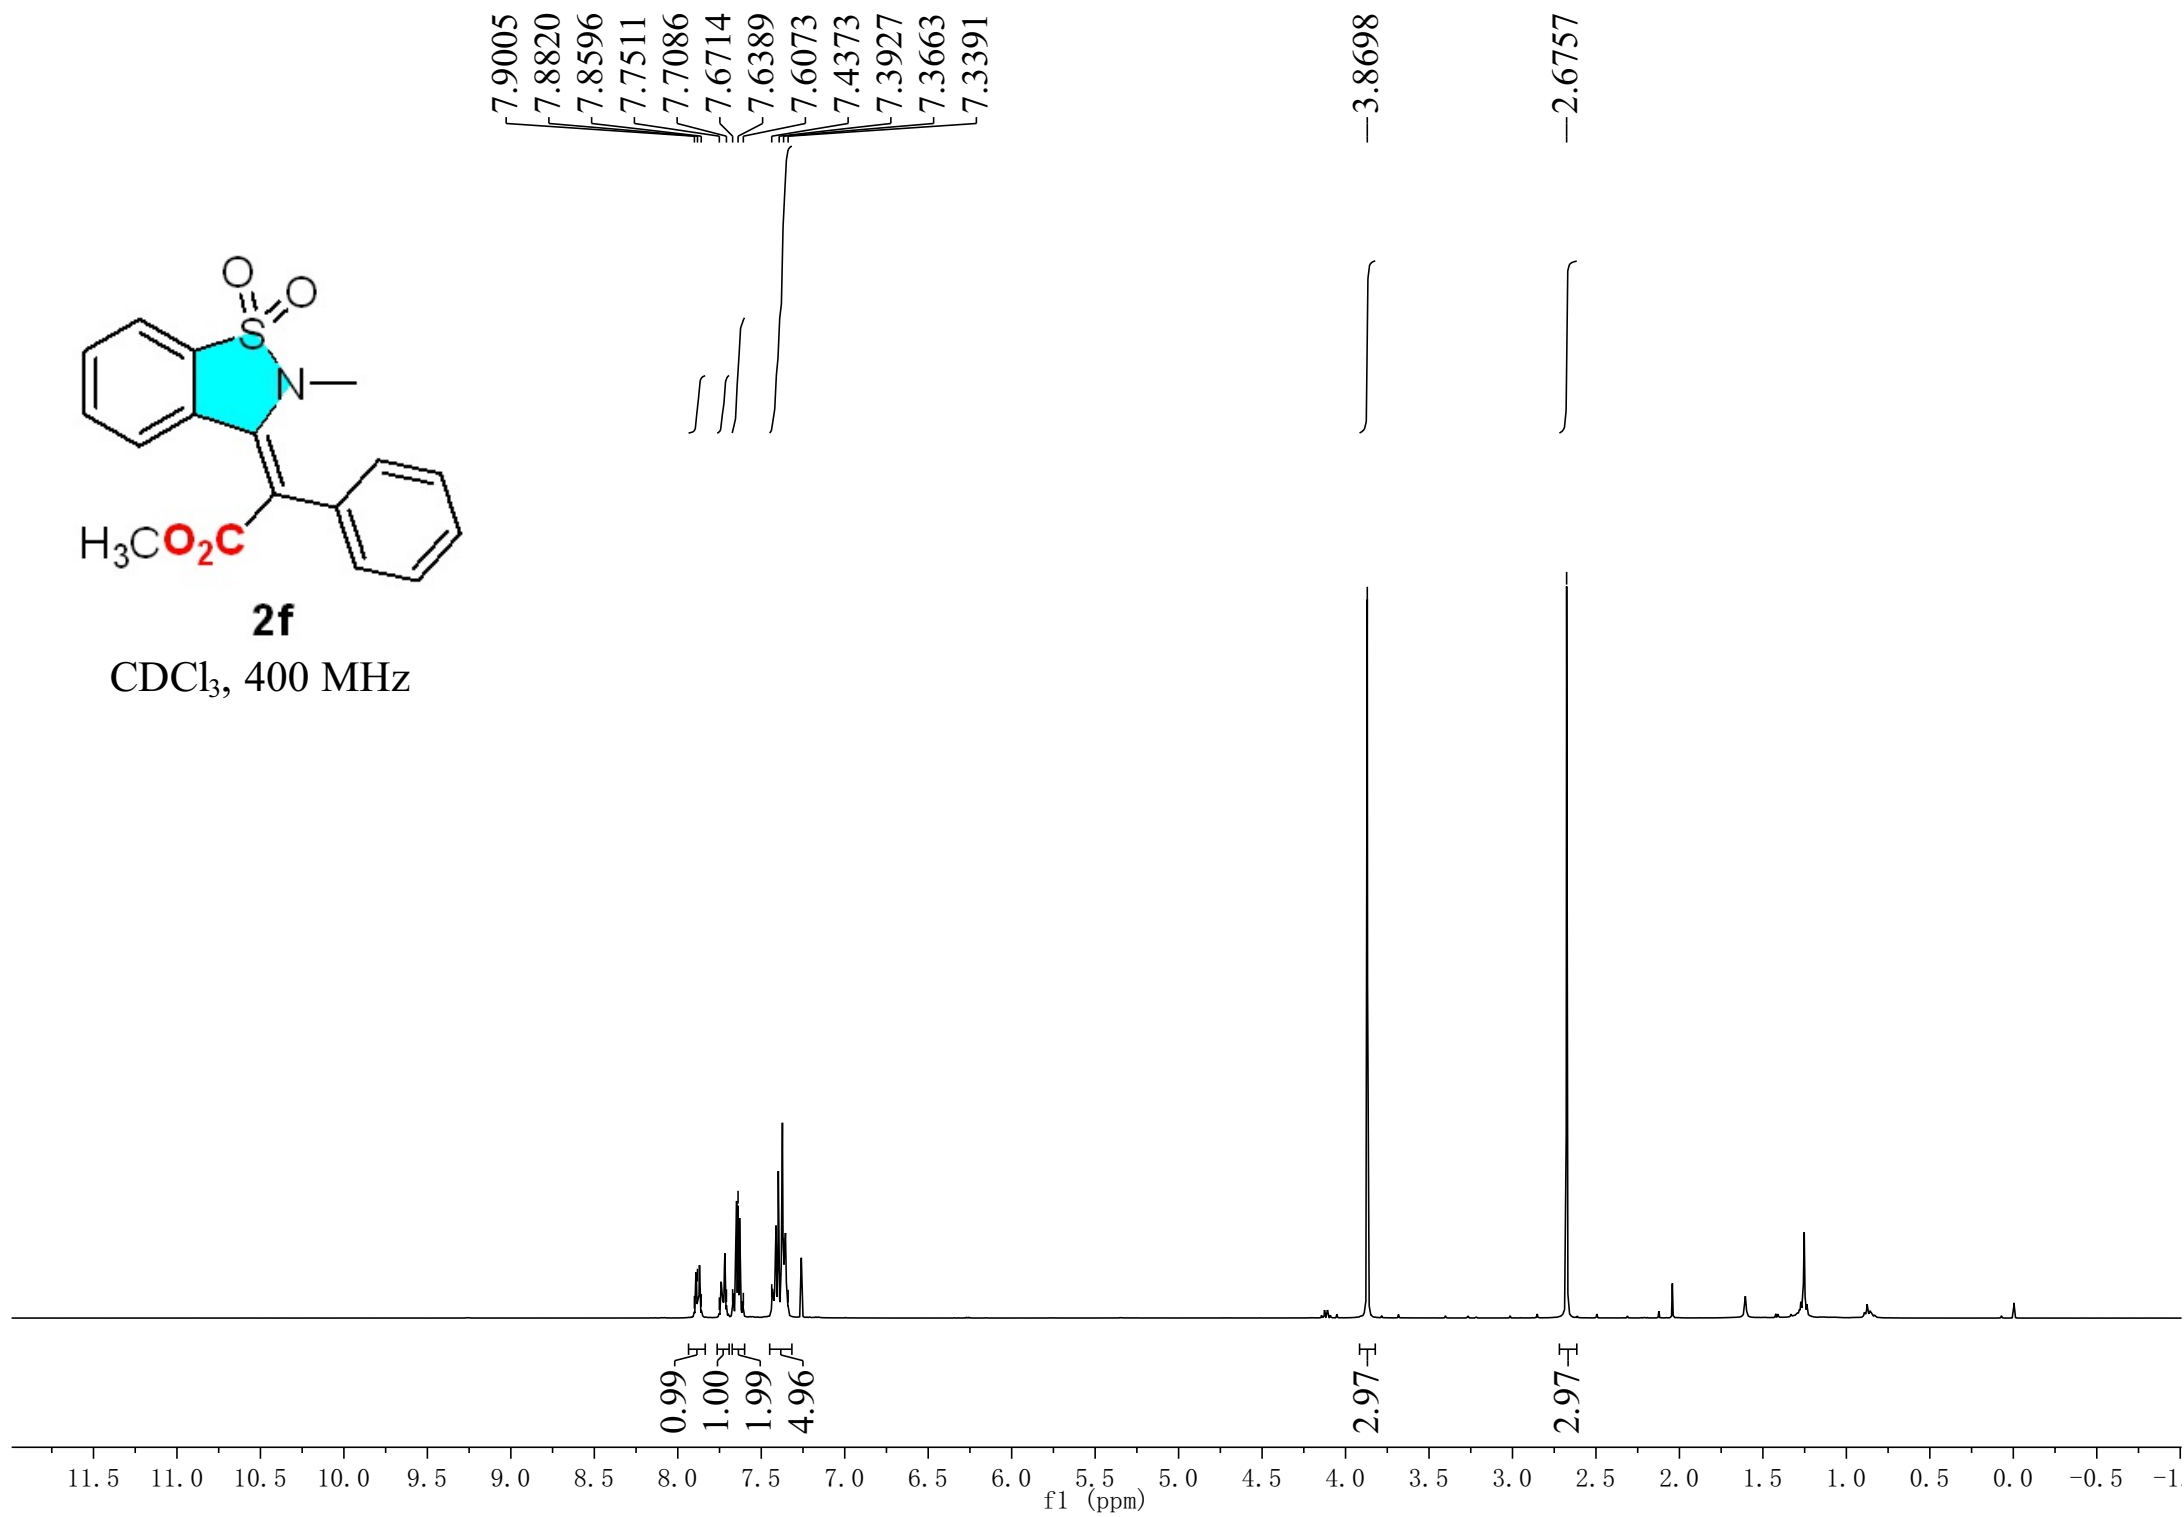



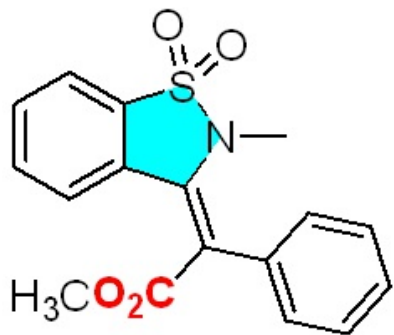

**2f**

CDCl<sub>3</sub>, 101 MHz

—169.34

137.08  
134.65  
133.14  
132.34  
130.88  
129.92  
129.69  
128.61  
128.49  
124.31  
121.28  
113.75

77.32  
77.00  
76.68

—52.94

—31.73

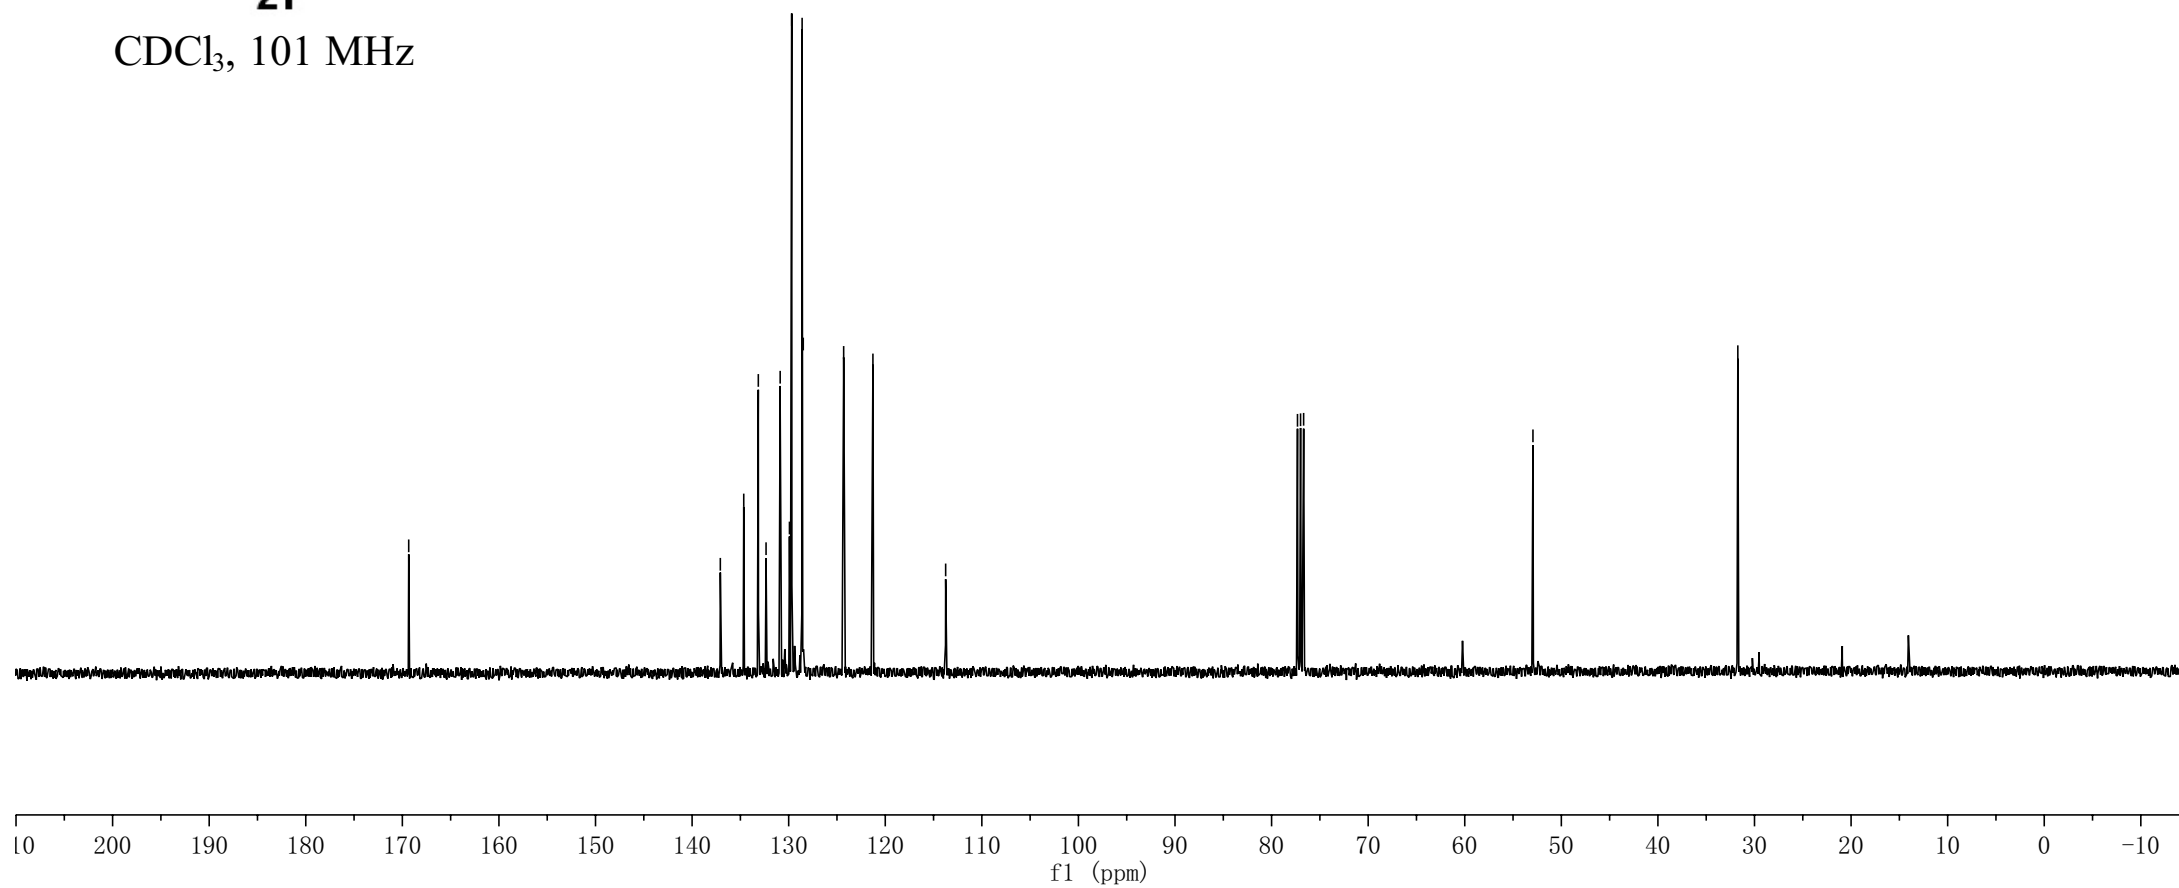

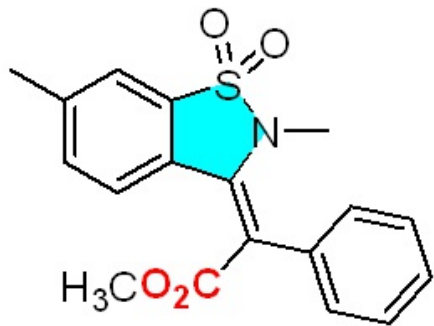

2g

CDCl<sub>3</sub>, 400 MHz

7.8054  
7.7964  
7.7911  
7.7824  
7.6624  
7.6176  
7.5970  
7.5798  
7.4750  
7.4704  
7.4611  
7.4479  
7.4233  
7.3971  
7.3824  
7.3560  
7.3424  
7.3377  
7.2595

3.8498  
3.5319  
2.9103  
2.6561  
2.4868  
2.3872

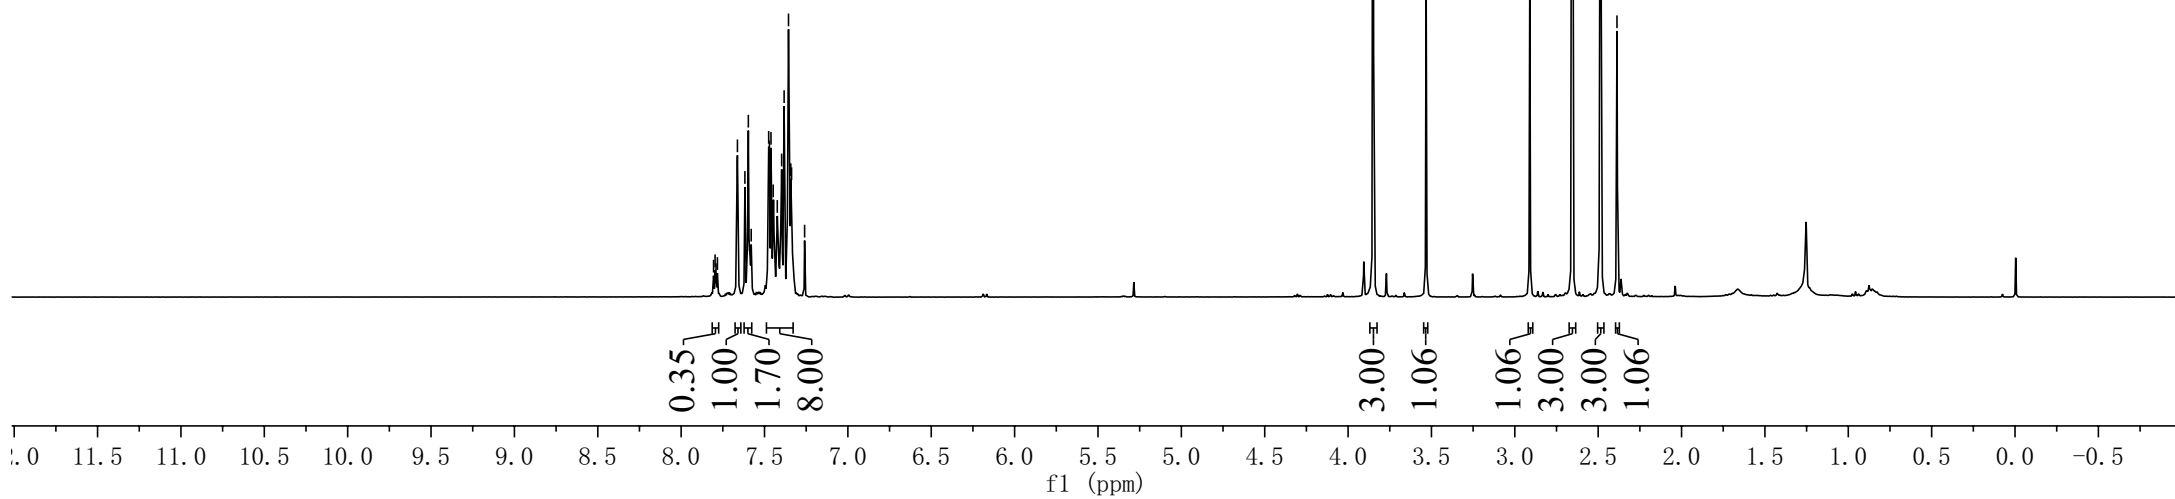



2g

CDCl<sub>3</sub>, 101 MHz

169.57  
166.60  
146.19  
142.15  
137.73  
136.56  
134.91  
134.84  
134.31  
134.26  
132.51  
132.14  
130.35  
130.12  
129.84  
128.63  
128.41  
128.22  
127.86  
127.44  
124.29  
121.29  
119.70  
115.42  
112.79

77.32  
77.00  
76.68

52.92  
52.05

33.24  
31.76

21.36  
20.25

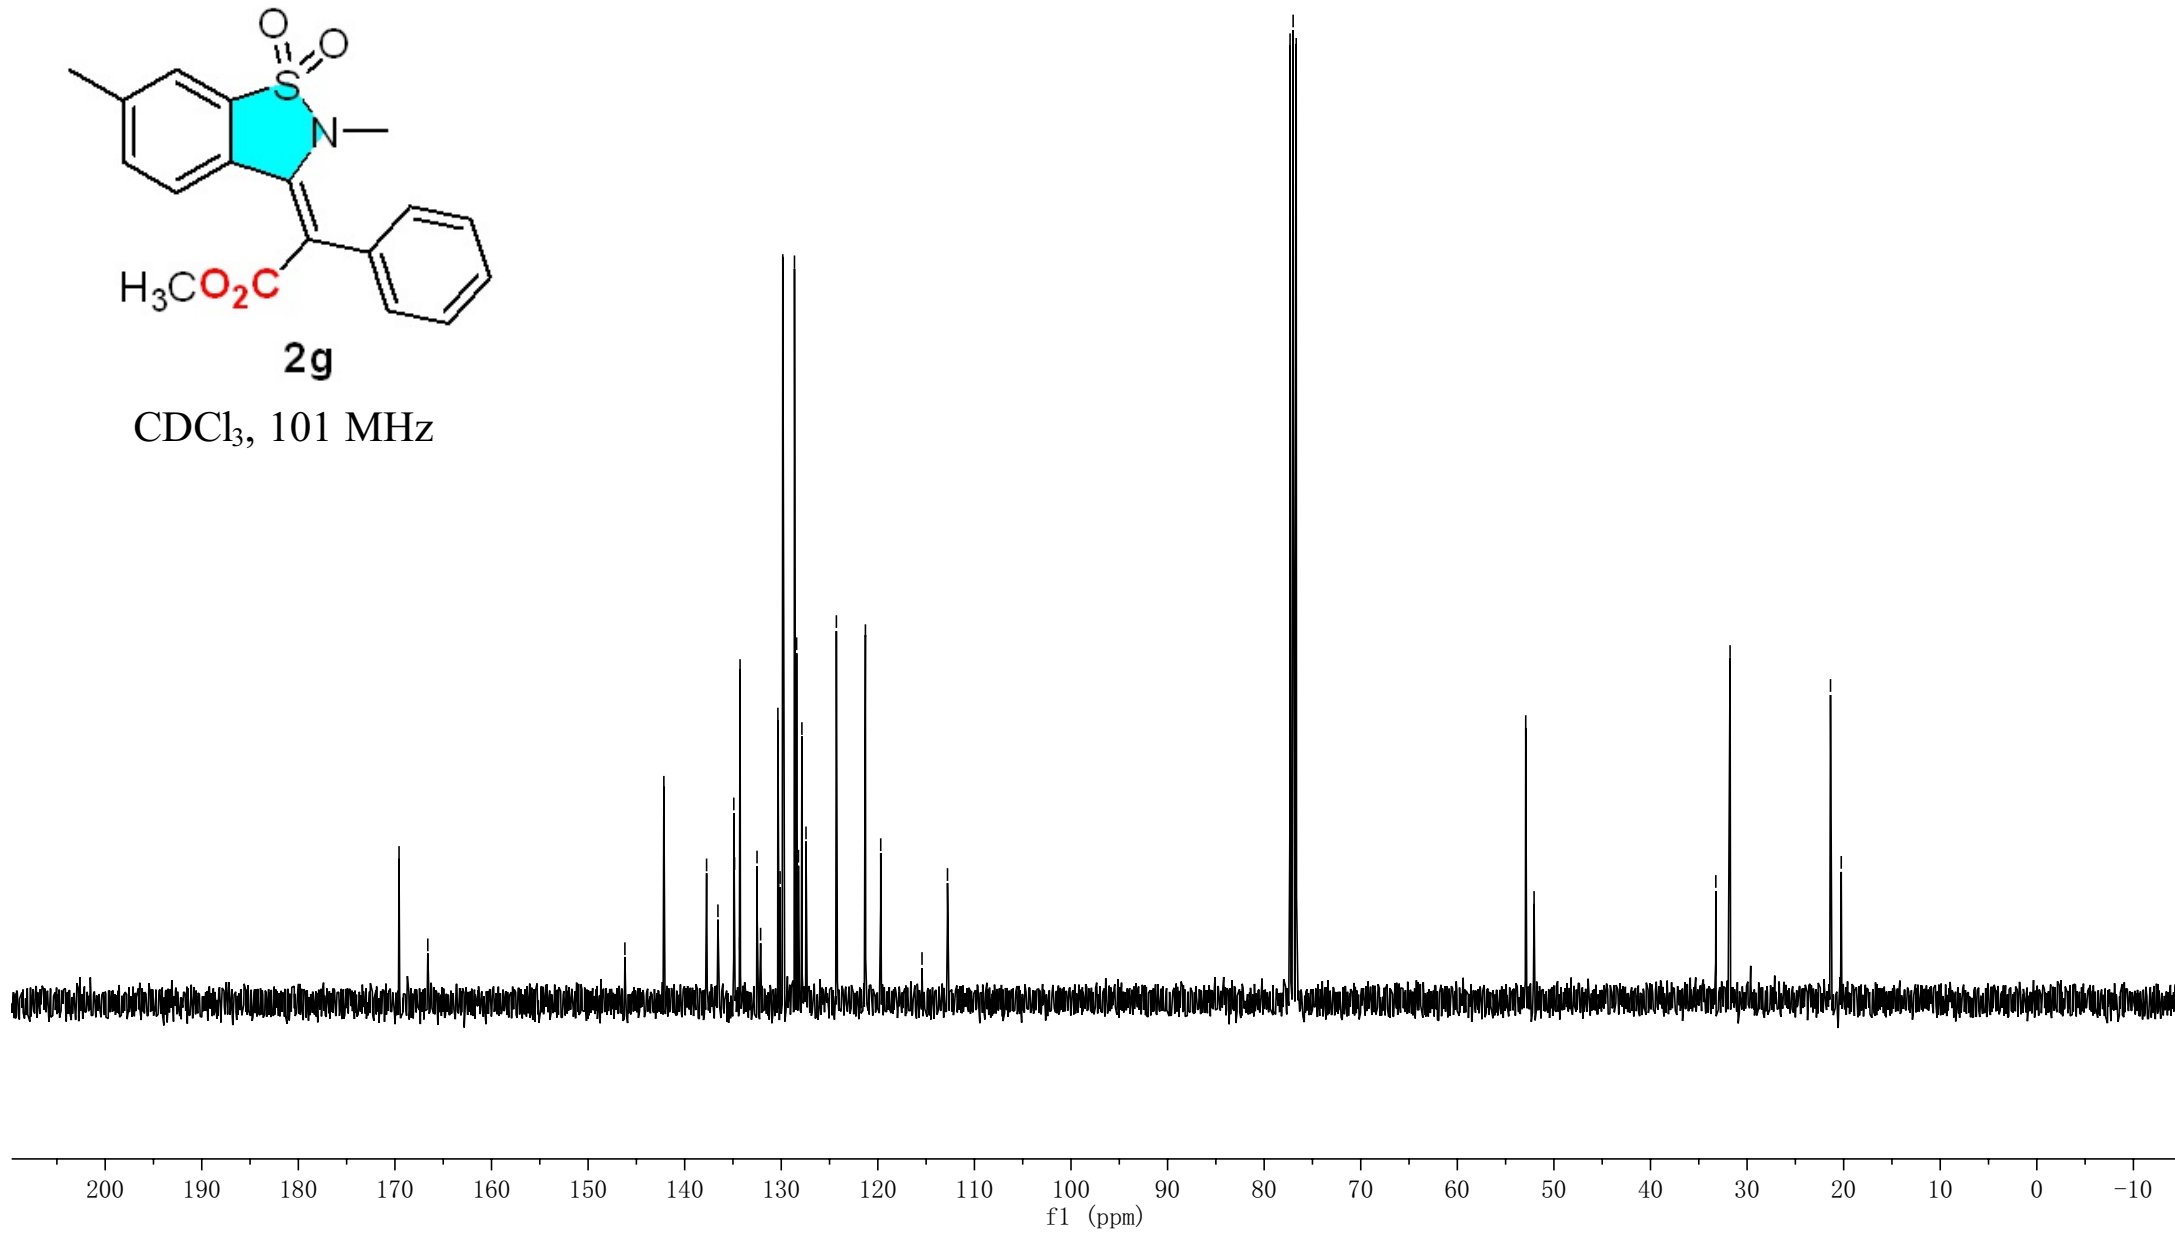

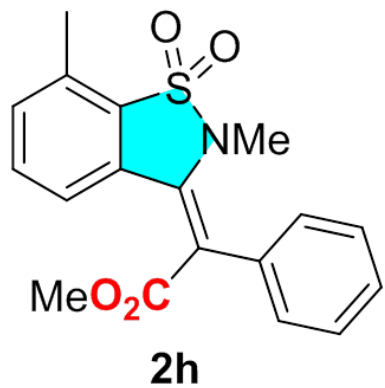

7.7729  
7.7530  
7.6699  
7.6206  
7.6001  
7.5828  
7.4842  
7.4769  
7.4718  
7.4497  
7.4307  
7.4268  
7.4127  
7.4085  
7.3949  
7.3900  
7.3811  
7.3742  
7.3688  
7.3589  
7.3507  
7.2629

3.8726  
3.8575

2.6623  
2.4988  
2.4813

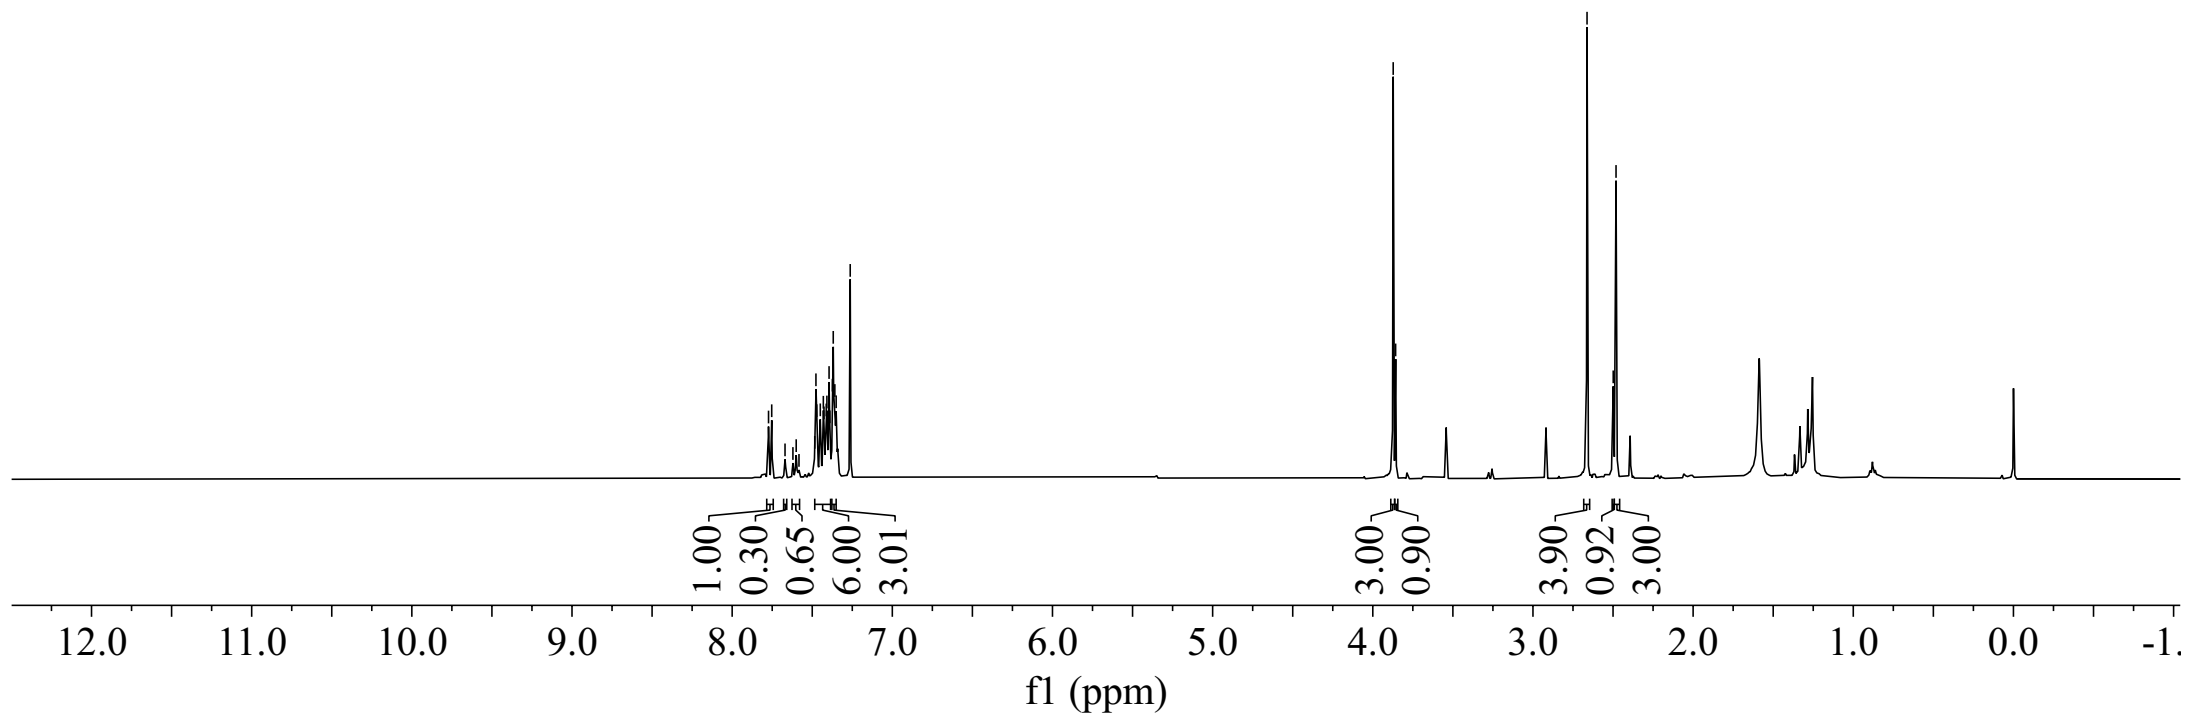

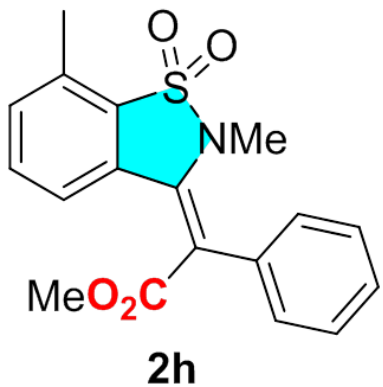

169.64  
144.08  
142.27  
137.47  
134.87  
134.31  
131.95  
130.38  
129.91  
129.85  
128.72  
128.70  
128.55  
127.93  
124.69  
124.35  
121.37  
121.20  
119.86  
113.34

77.32  
77.00  
76.68

-52.97

31.83  
31.81  
22.22  
21.38

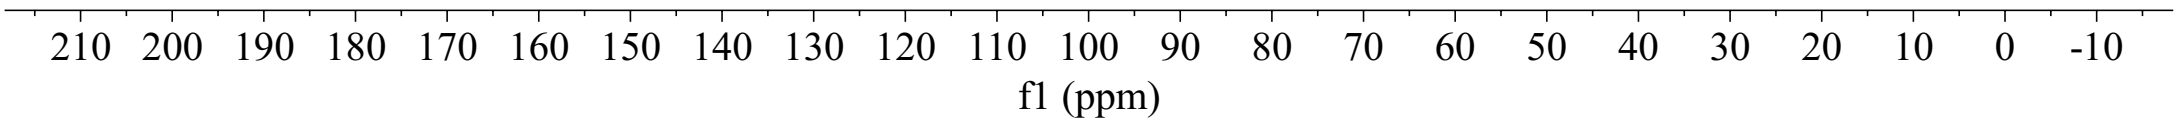

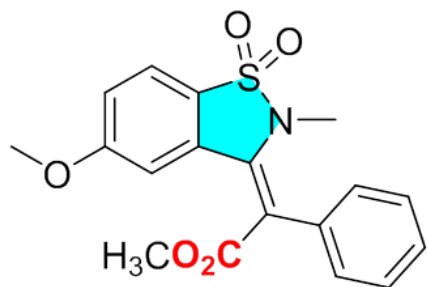

2i

CDCl<sub>3</sub>, 400 MHz

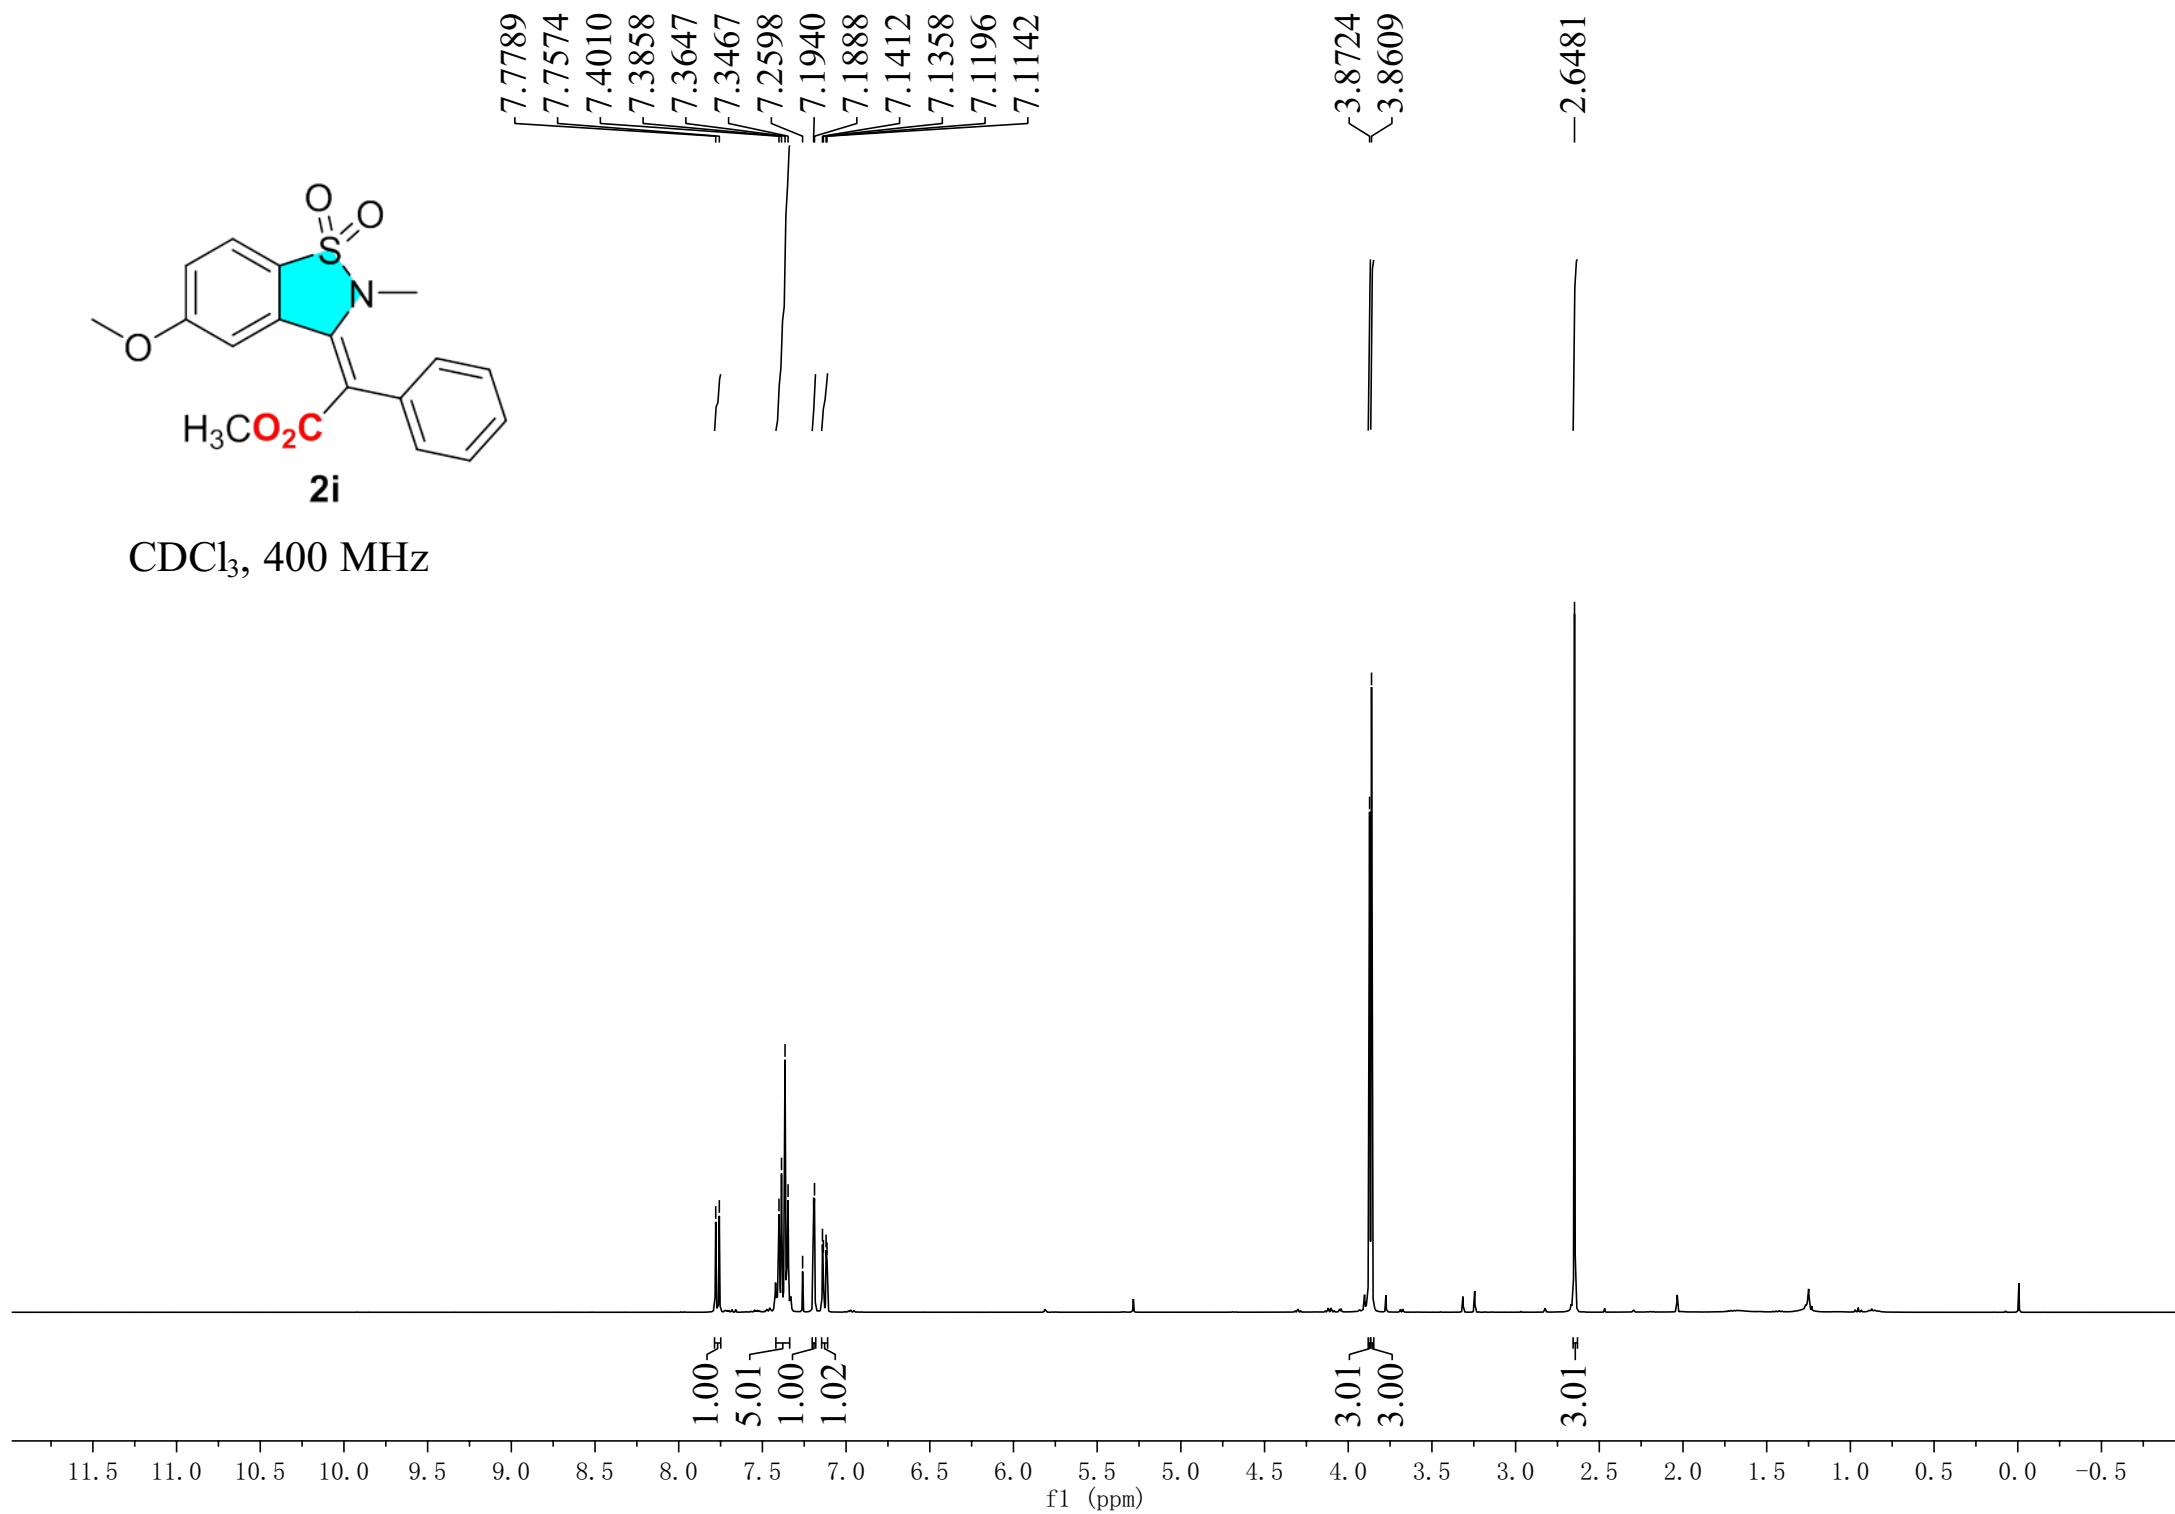

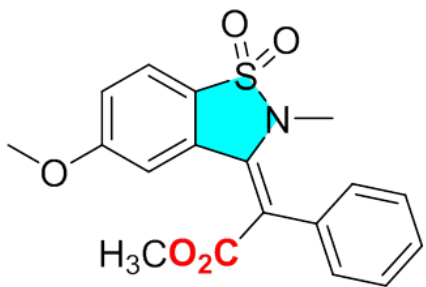

**2i**

$\text{CDCl}_3$ , 101 MHz

—169.47  
—163.35

137.15  
134.75  
132.25  
129.73  
128.66  
128.52  
124.72  
122.75  
117.55  
113.62  
108.87

77.32  
77.00  
76.68

~55.77  
~52.96

—31.88

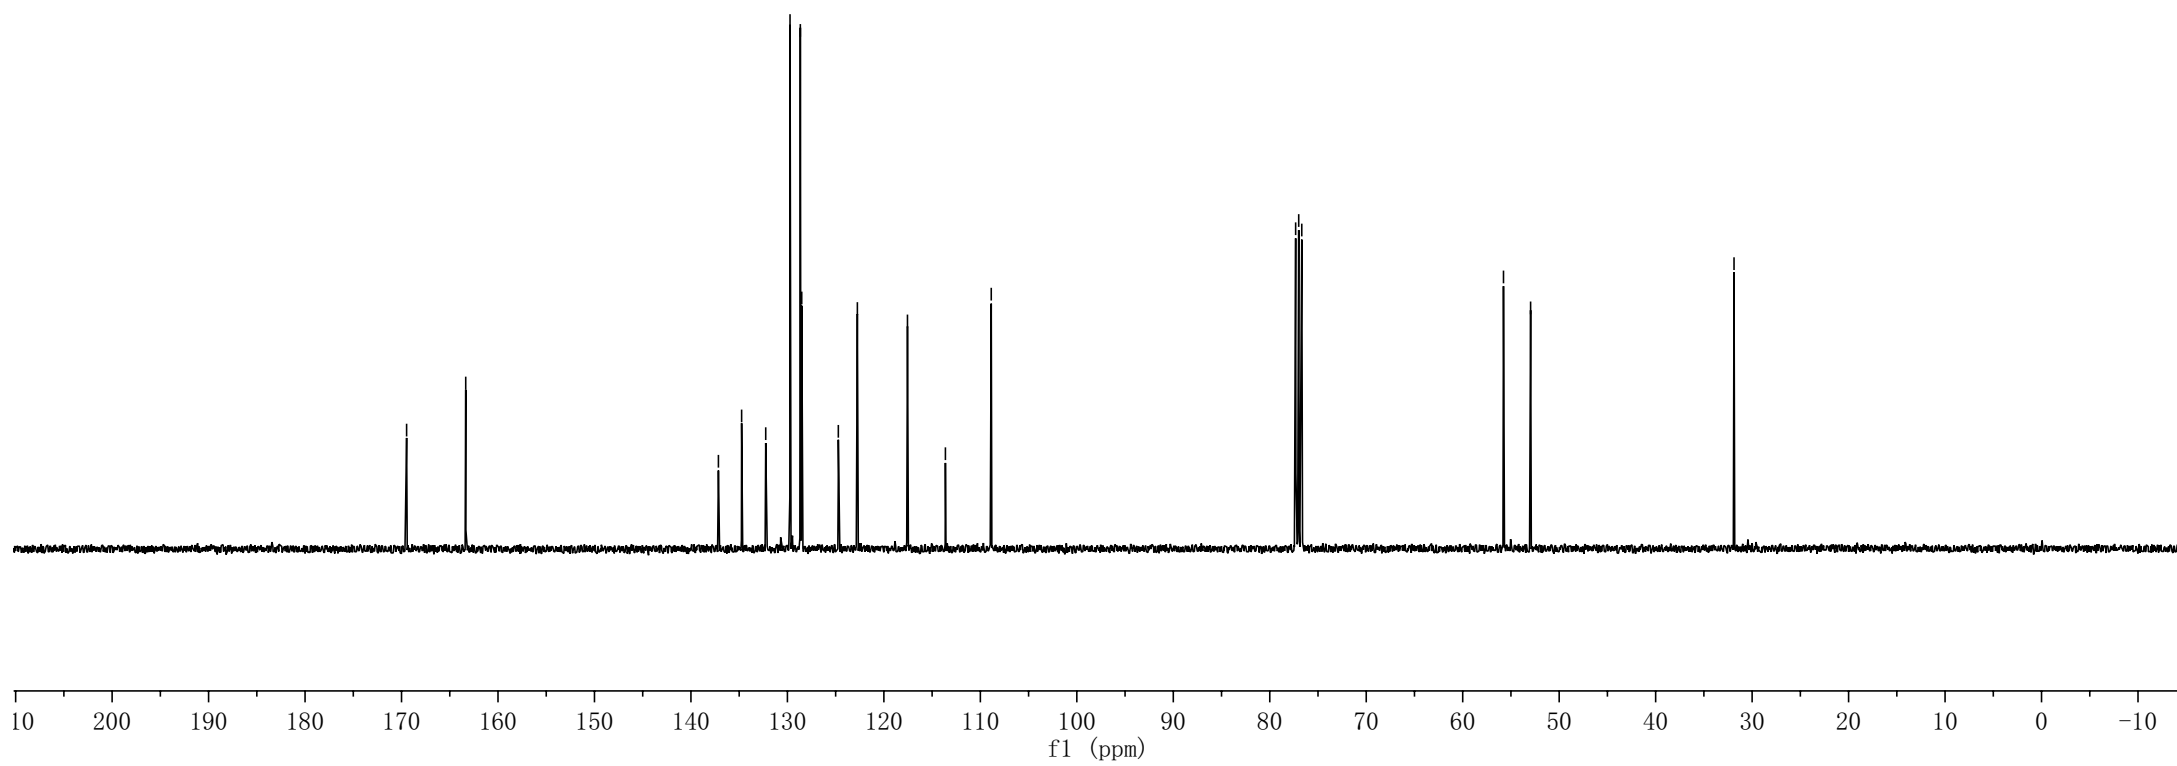

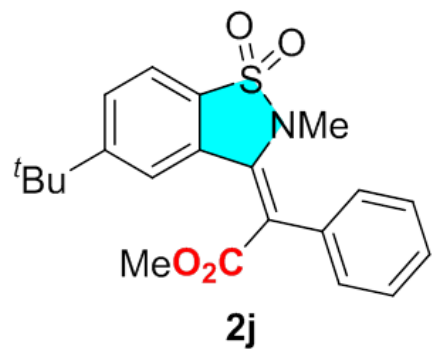

7.8090  
7.7876  
7.7816  
7.7779  
7.6815  
7.6774  
7.6608  
7.6569  
7.4342  
7.4307  
7.4265  
7.4131  
7.4085  
7.3953  
7.3775  
7.3638  
7.3599  
7.3554  
7.2598

3.8871

2.6632

1.3629

1.99

1.01

5.04

3.03

3.04

9.07

12.0 11.5 11.0 10.5 10.0 9.5 9.0 8.5 8.0 7.5 7.0 6.5 6.0 5.5 5.0 4.5 4.0 3.5 3.0 2.5 2.0 1.5 1.0 0.5 0.0 -0.5 -1.0

f1 (ppm)



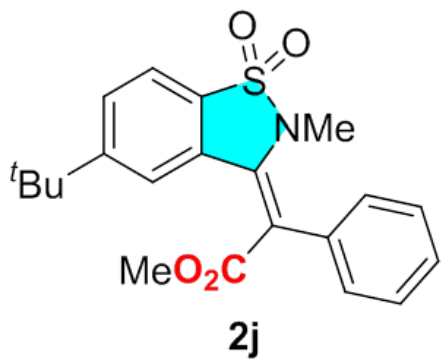

—169.71

—157.17

137.36

134.83

130.06

129.77

129.72

128.73

128.71

128.52

121.09

120.97

113.21

77.32

77.00

76.68

—53.03

35.63

31.86

31.10

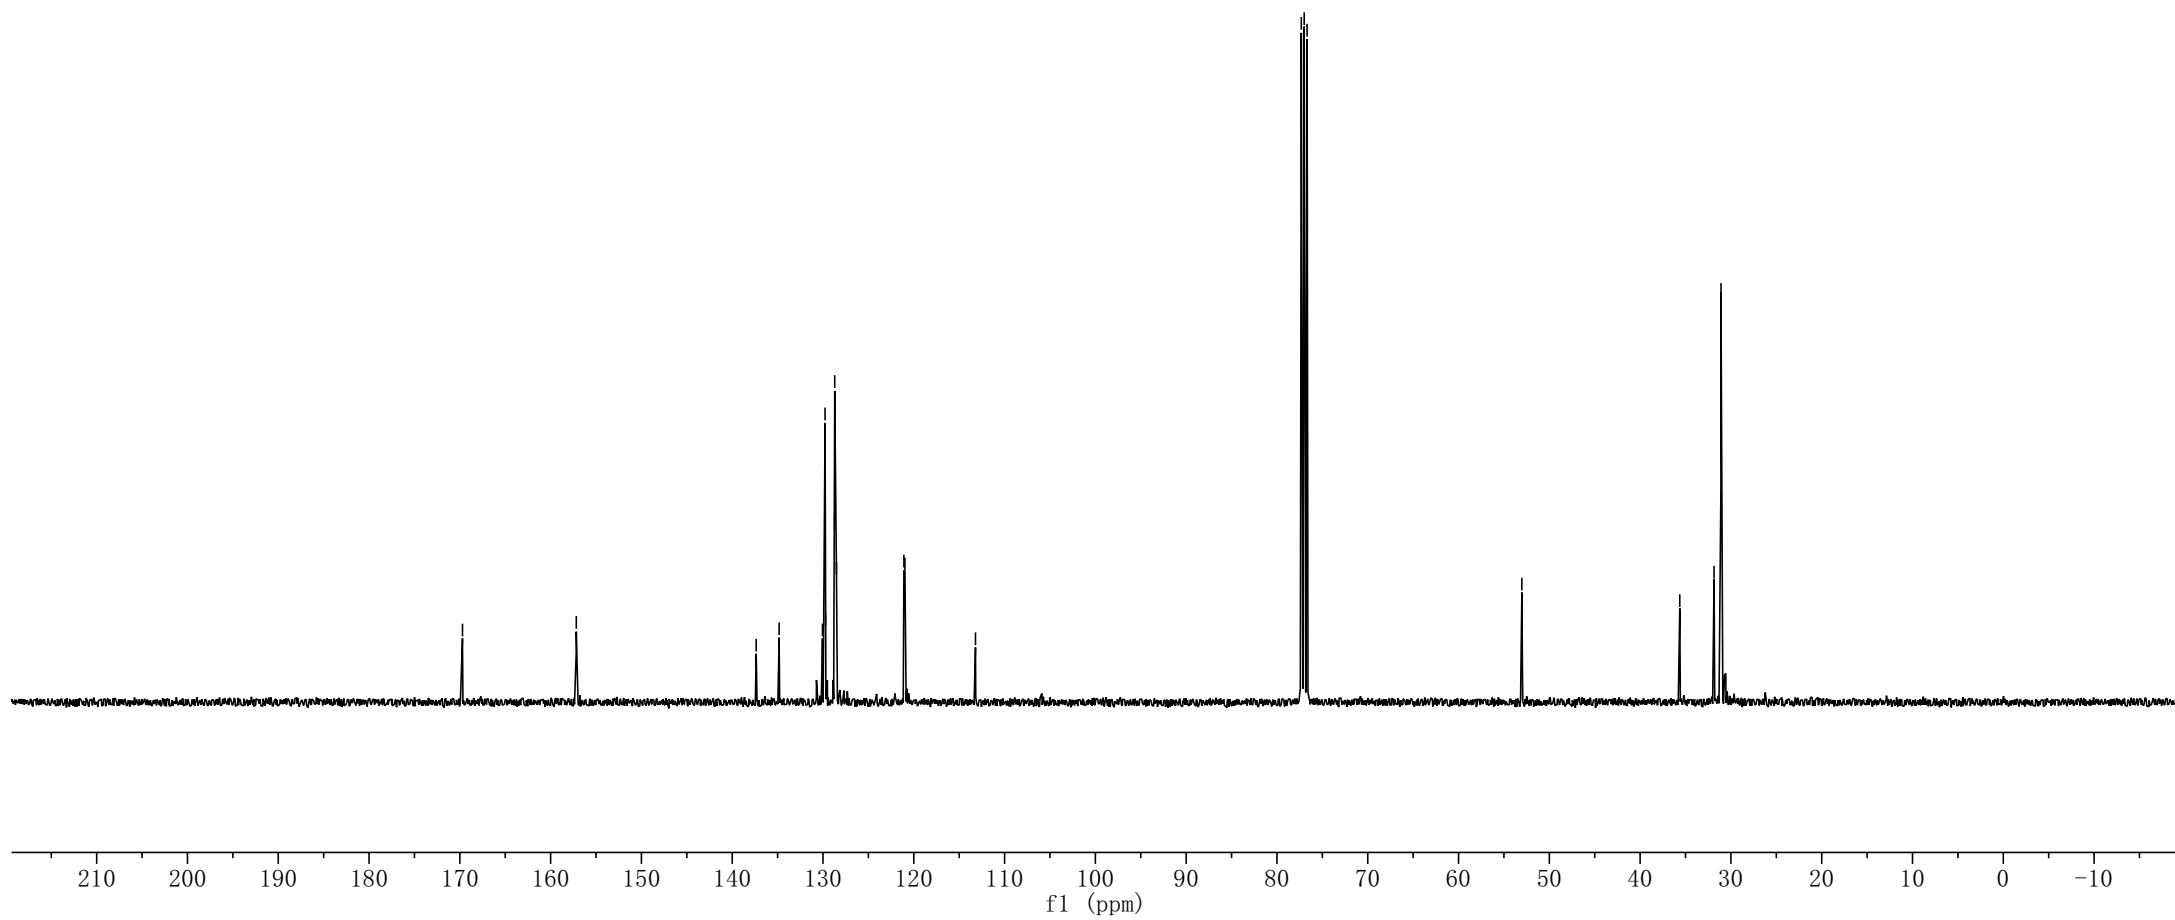

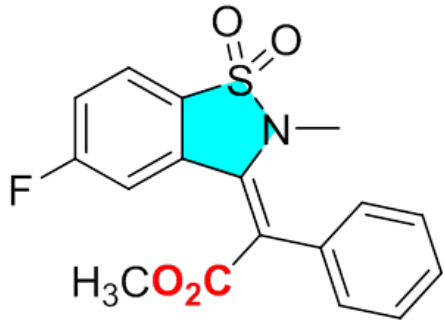

2k

CDCl<sub>3</sub>, 400 MHz

7.8823  
7.8699  
7.8609  
7.8485  
7.4435  
7.4382  
7.4192  
7.4144  
7.4009  
7.3863  
7.3825  
7.3664  
7.3619  
7.3464  
7.3337  
7.3283  
7.3130  
7.3077  
7.2605

3.8759

2.6595

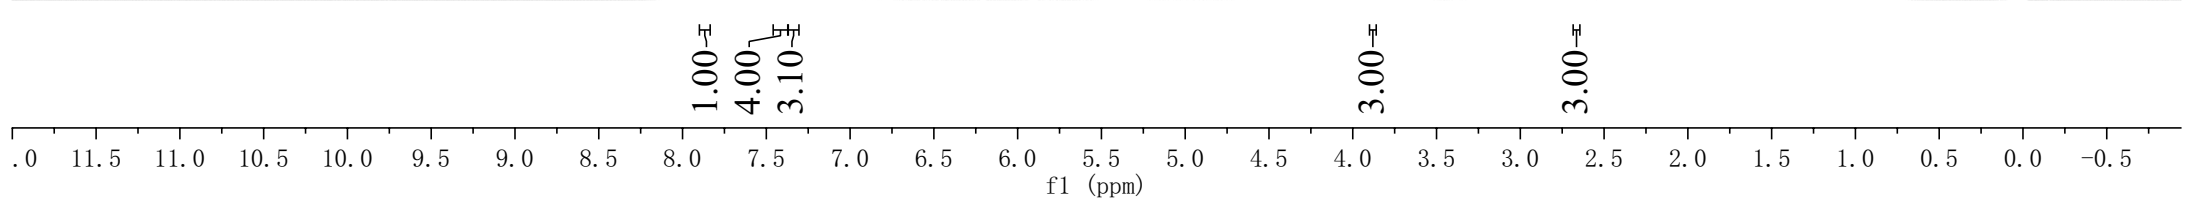

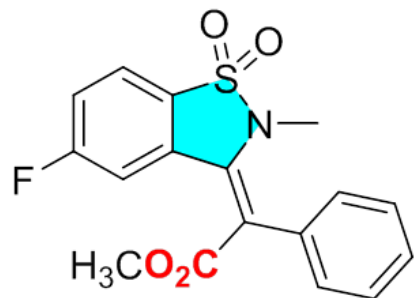

**2k**

CDCl<sub>3</sub>, 101 MHz

- 168.9891
- 166.4900
- 163.9679
- 136.2728
- 136.2424
- 134.3577
- 132.9300
- 132.8291
- 129.6819
- 128.7813
- 128.7410
- 128.5732
- 128.5456
- 123.6263
- 123.5263
- 118.9655
- 118.7220
- 115.0665
- 111.9314
- 111.6644

—53.1725

—31.9843

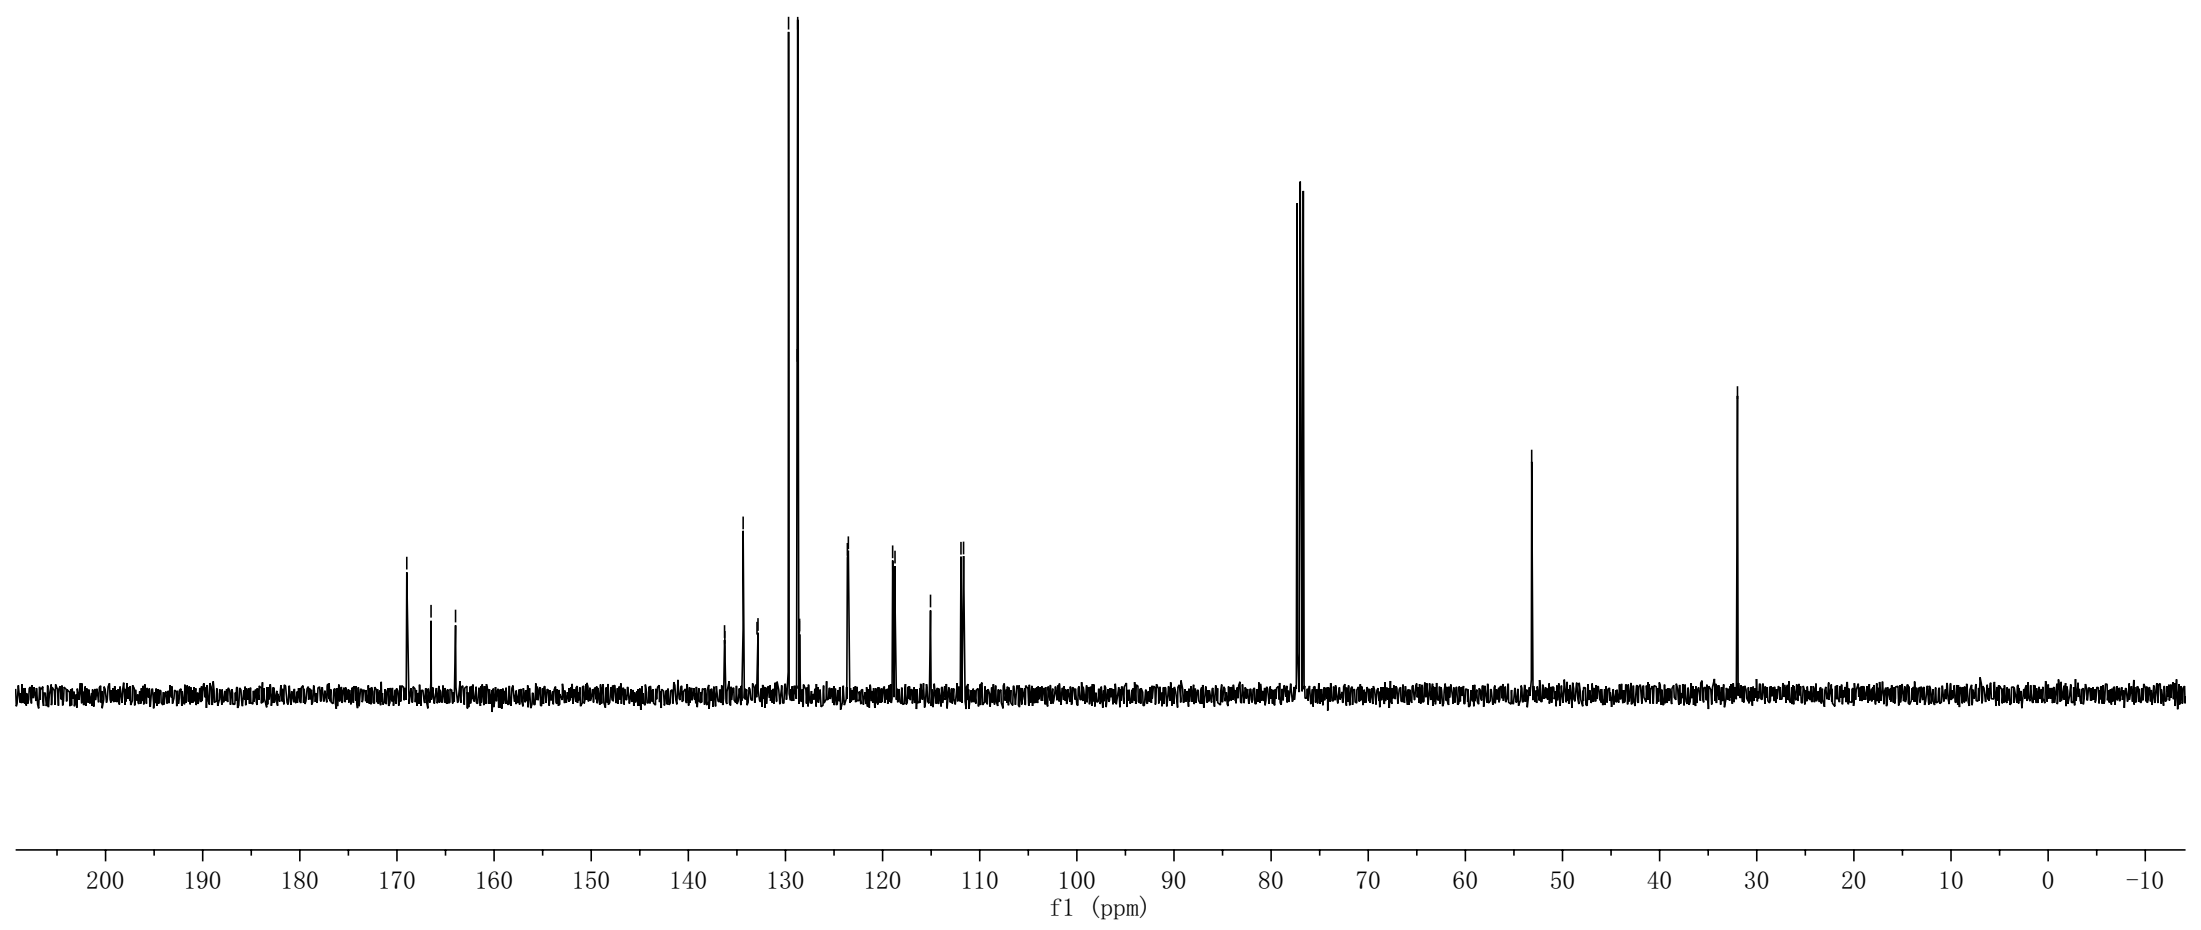

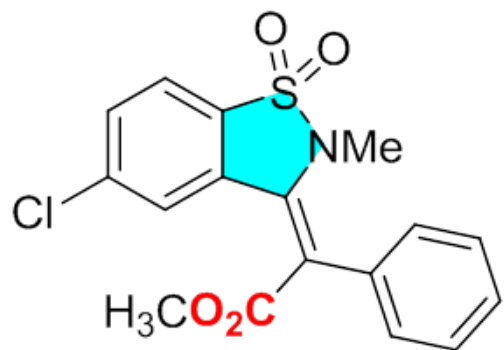

21

CDCl<sub>3</sub>, 400 MHz

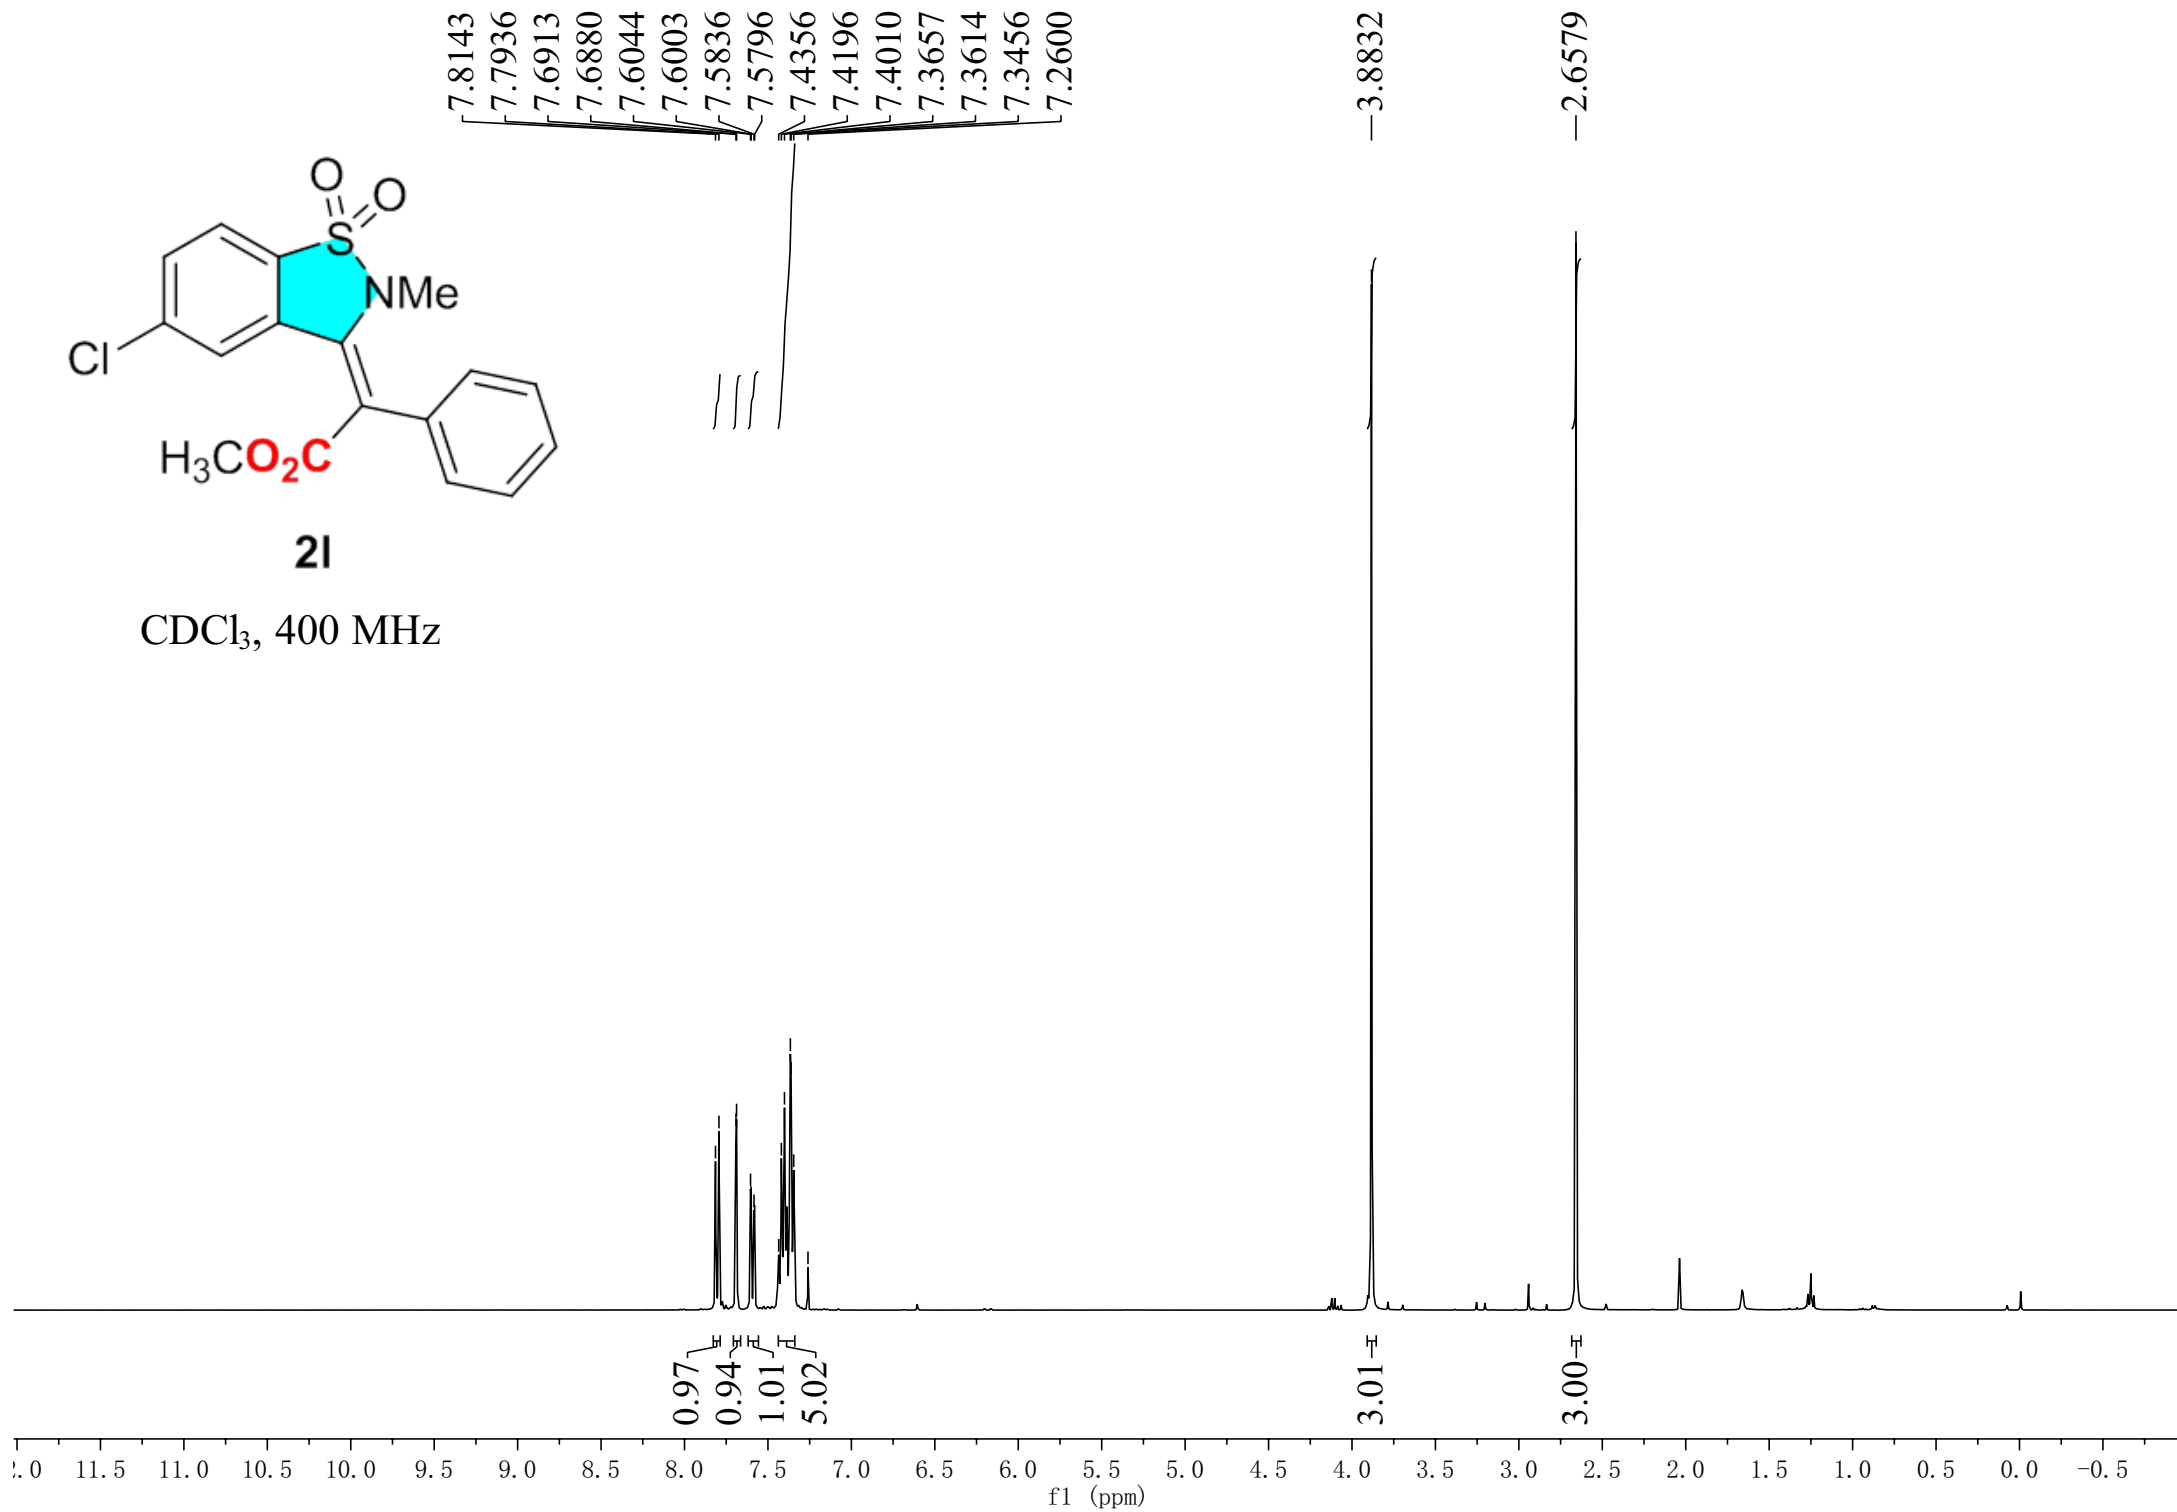

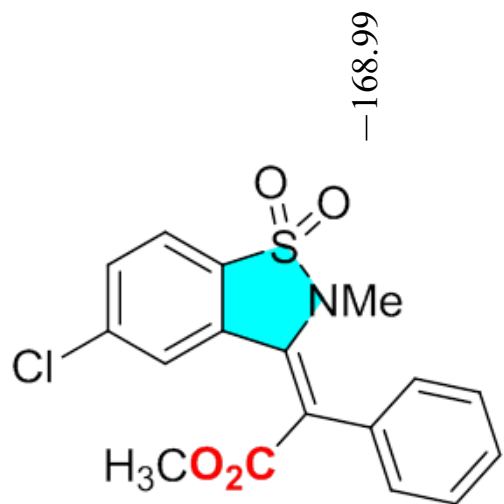

2l

CDCl<sub>3</sub>, 101 MHz

—168.99

139.76  
136.04  
134.30  
131.82  
131.14  
130.79  
129.69  
128.80  
128.73  
124.69  
122.50  
115.00

77.32  
77.00  
76.68

—53.15

—31.95

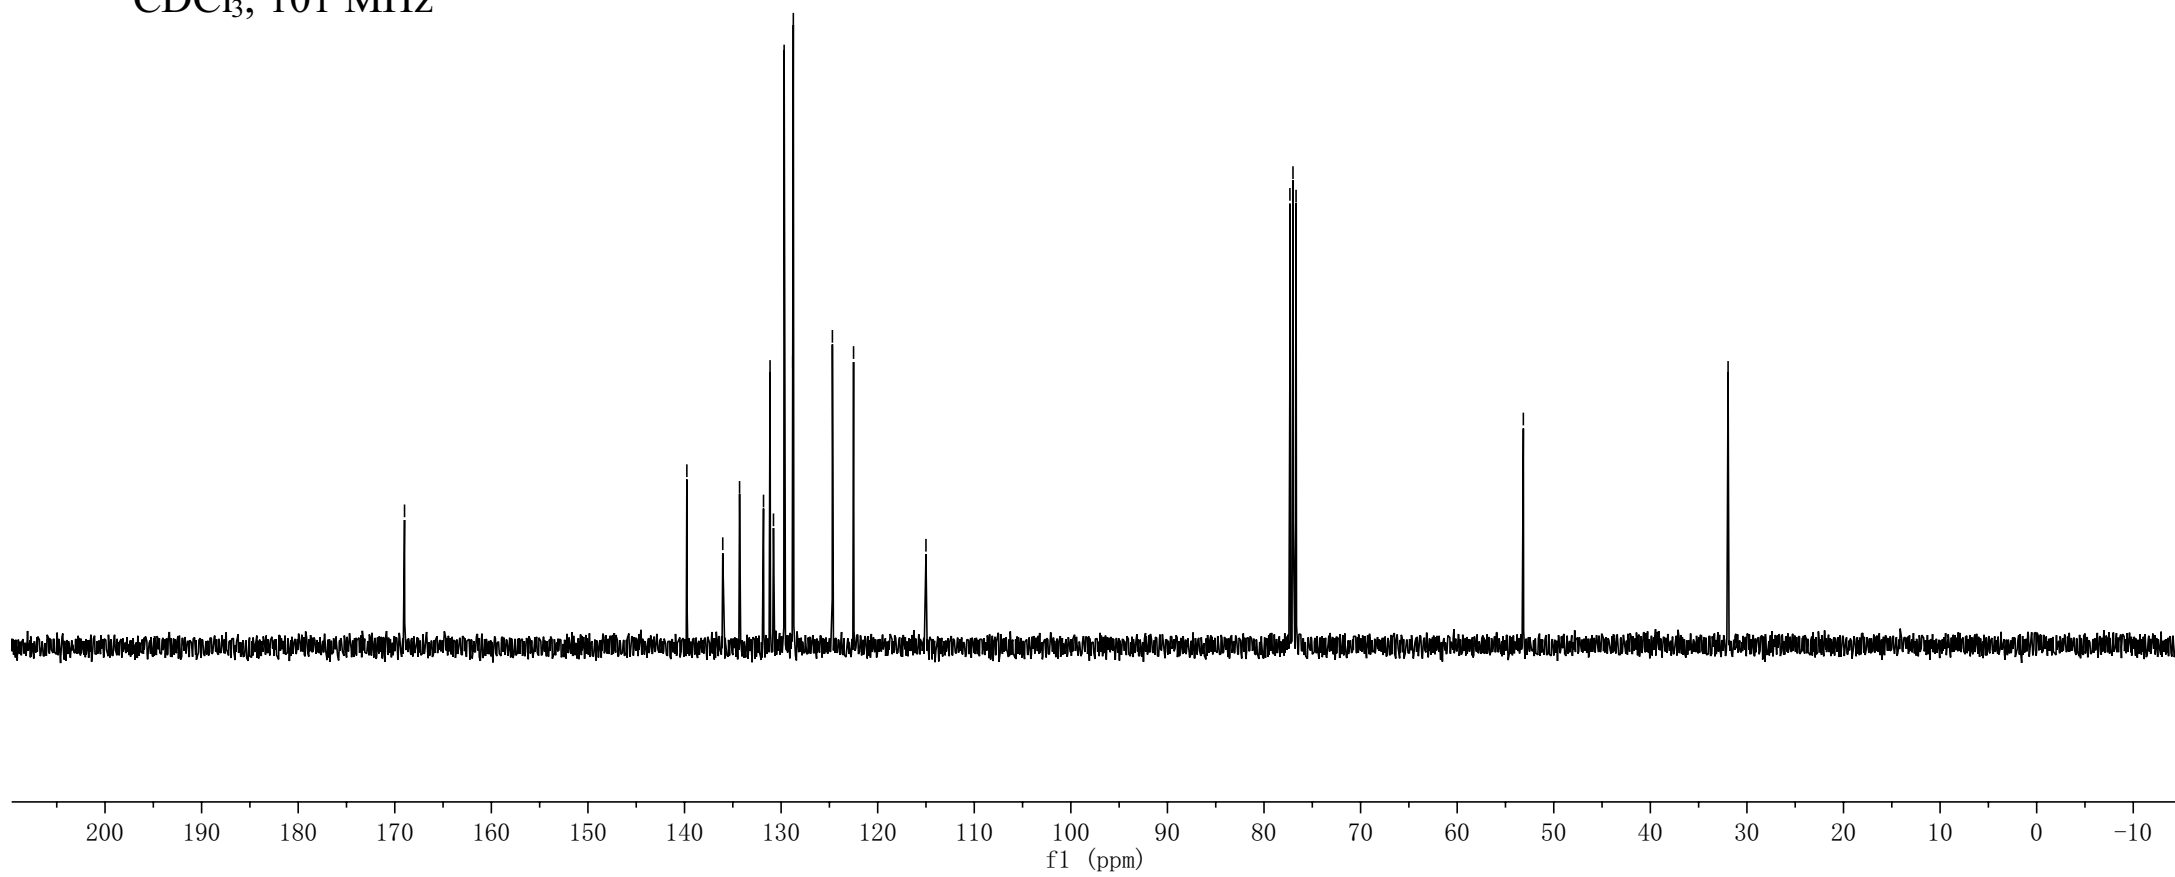

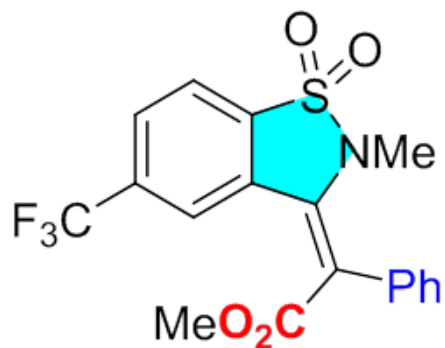

**2m**

CDCl<sub>3</sub>, 400 MHz

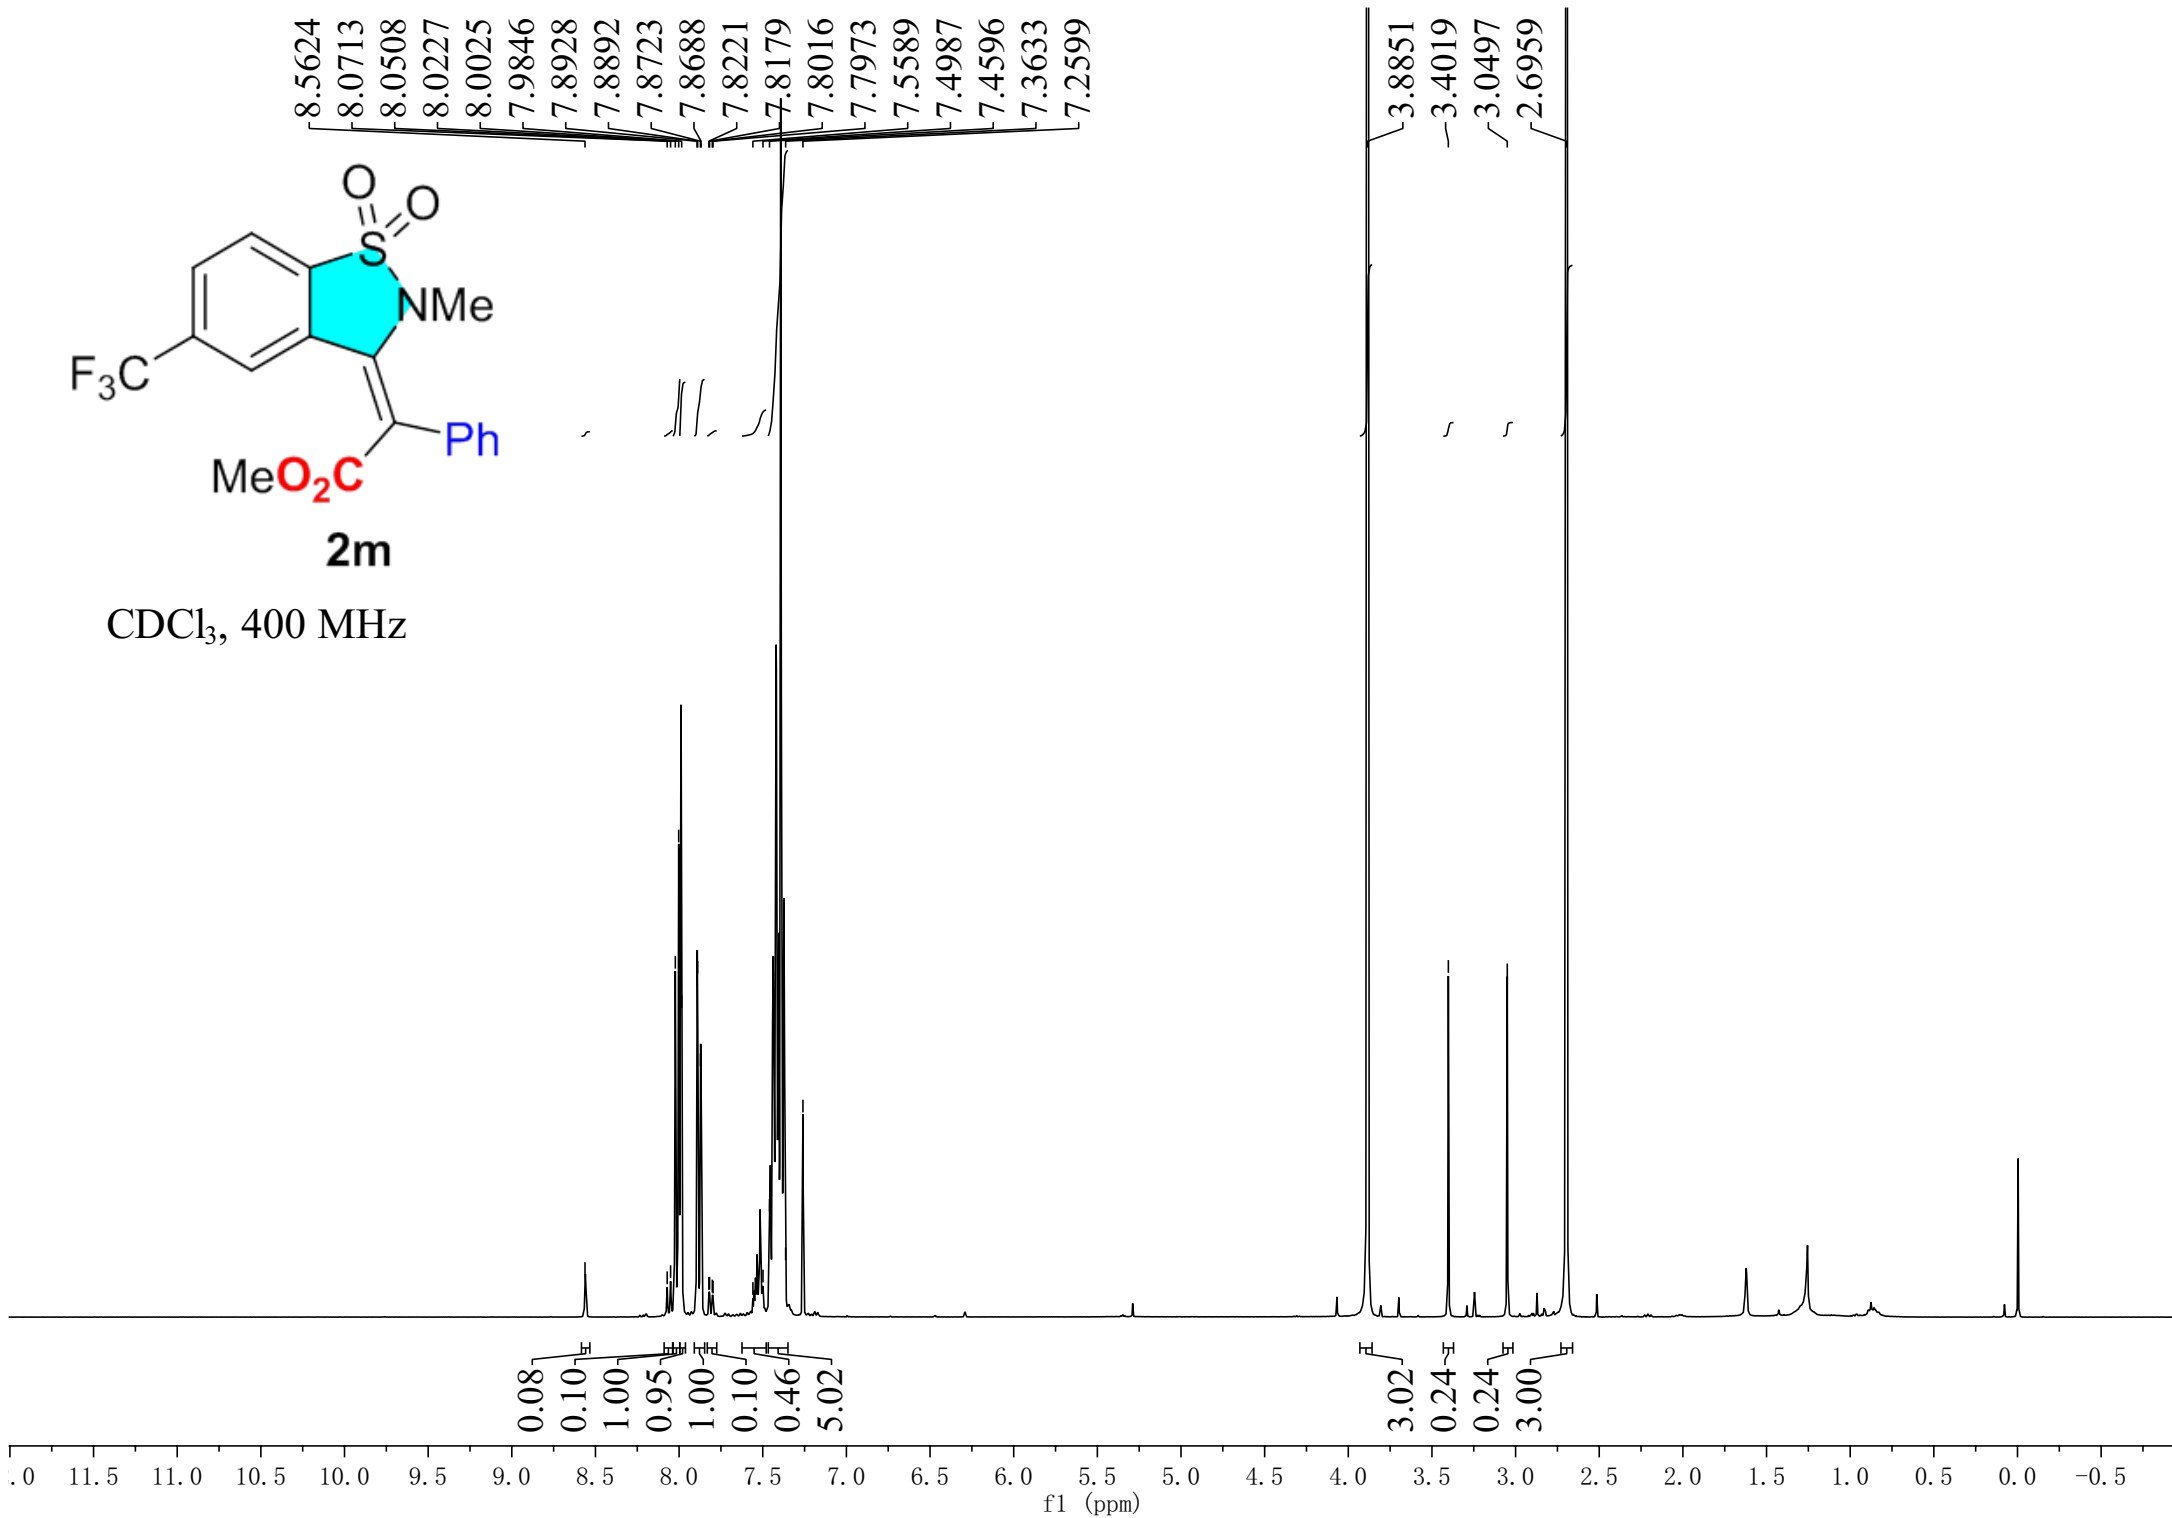

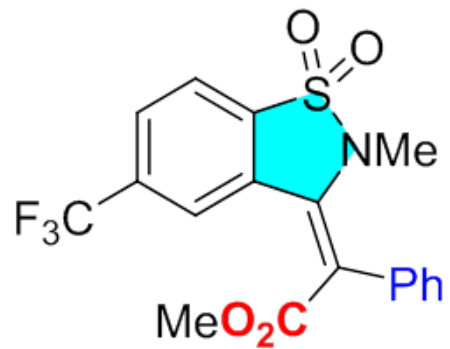

2m

CDCl<sub>3</sub>, 101 MHz

168.9006  
167.0132  
135.6553  
135.3602  
135.3494  
135.3085  
134.9798  
134.0698  
130.9648  
129.7087  
128.9874  
128.8627  
128.8132  
127.8159  
127.7805  
127.7460  
127.7119  
124.2418  
122.8042  
122.2784  
121.8649  
121.8231  
121.7812  
121.7401  
121.5235  
115.6879  
77.3187  
77.0008  
76.6828

53.1029  
52.2273

35.0769  
31.9927

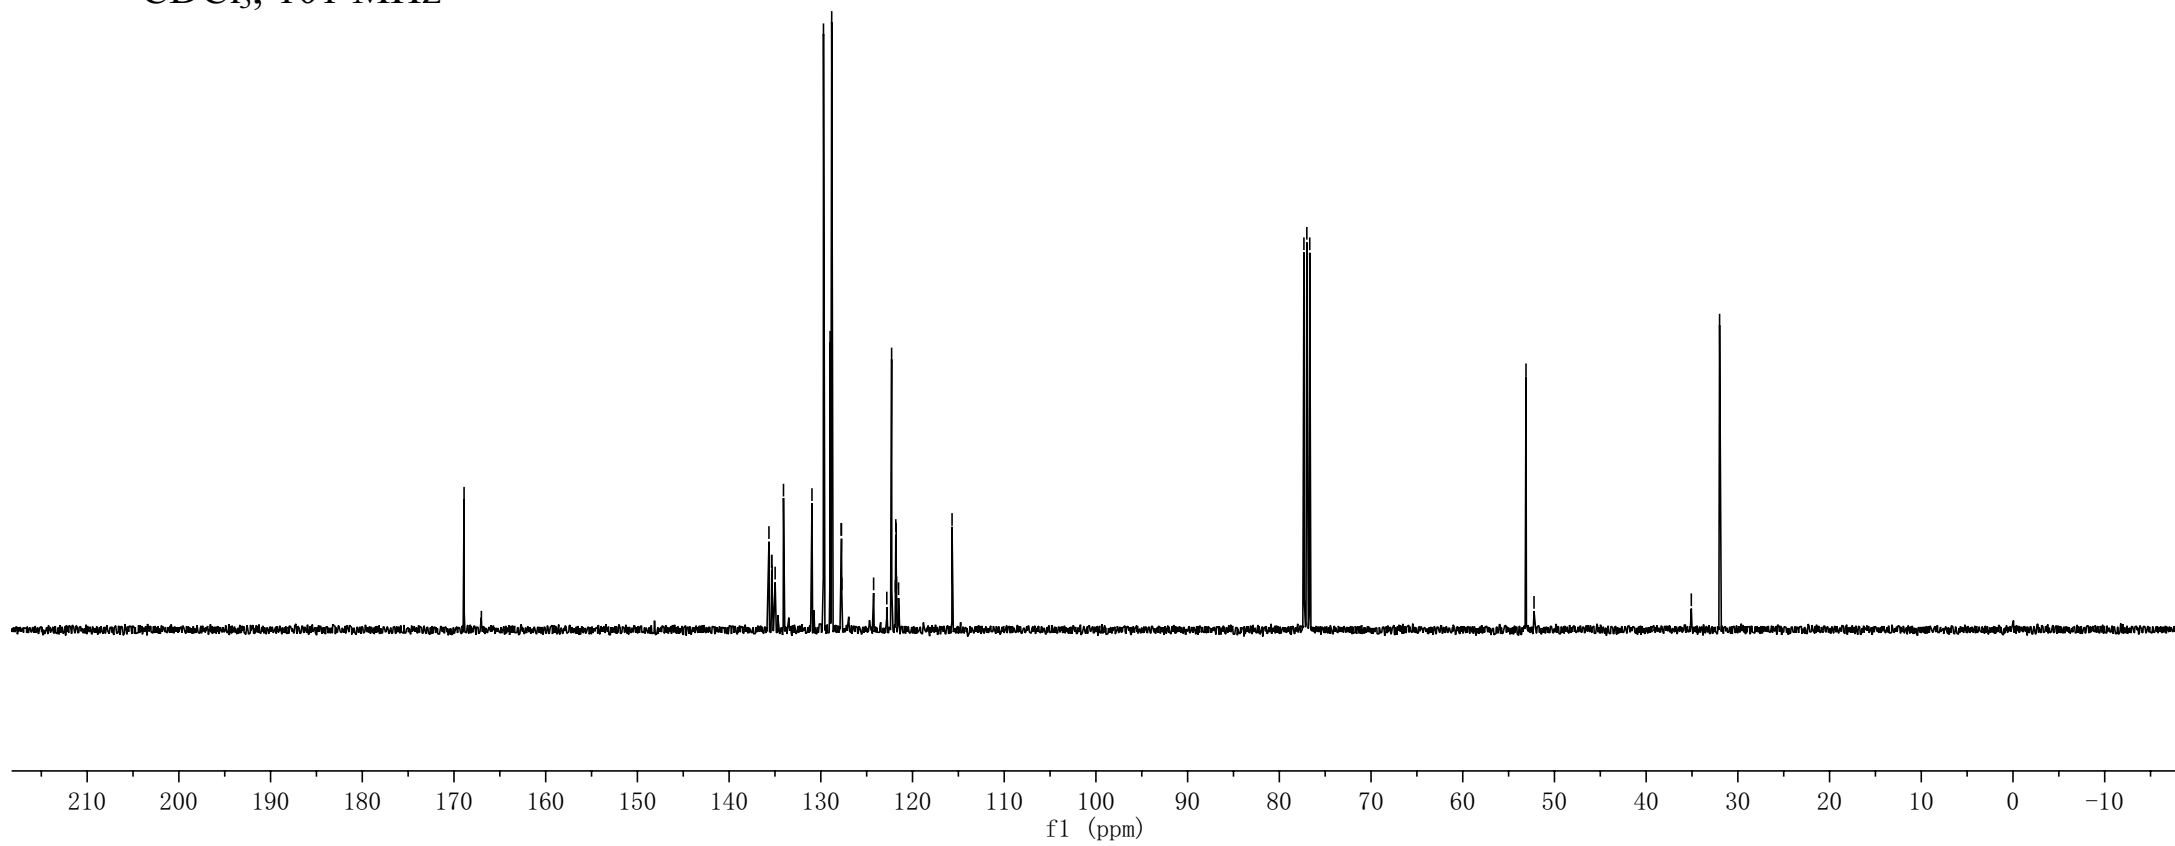

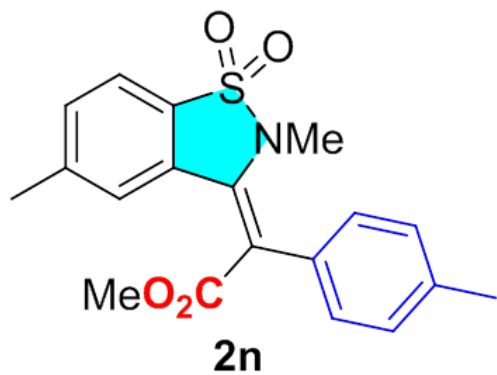

CDCl<sub>3</sub>, 400 MHz

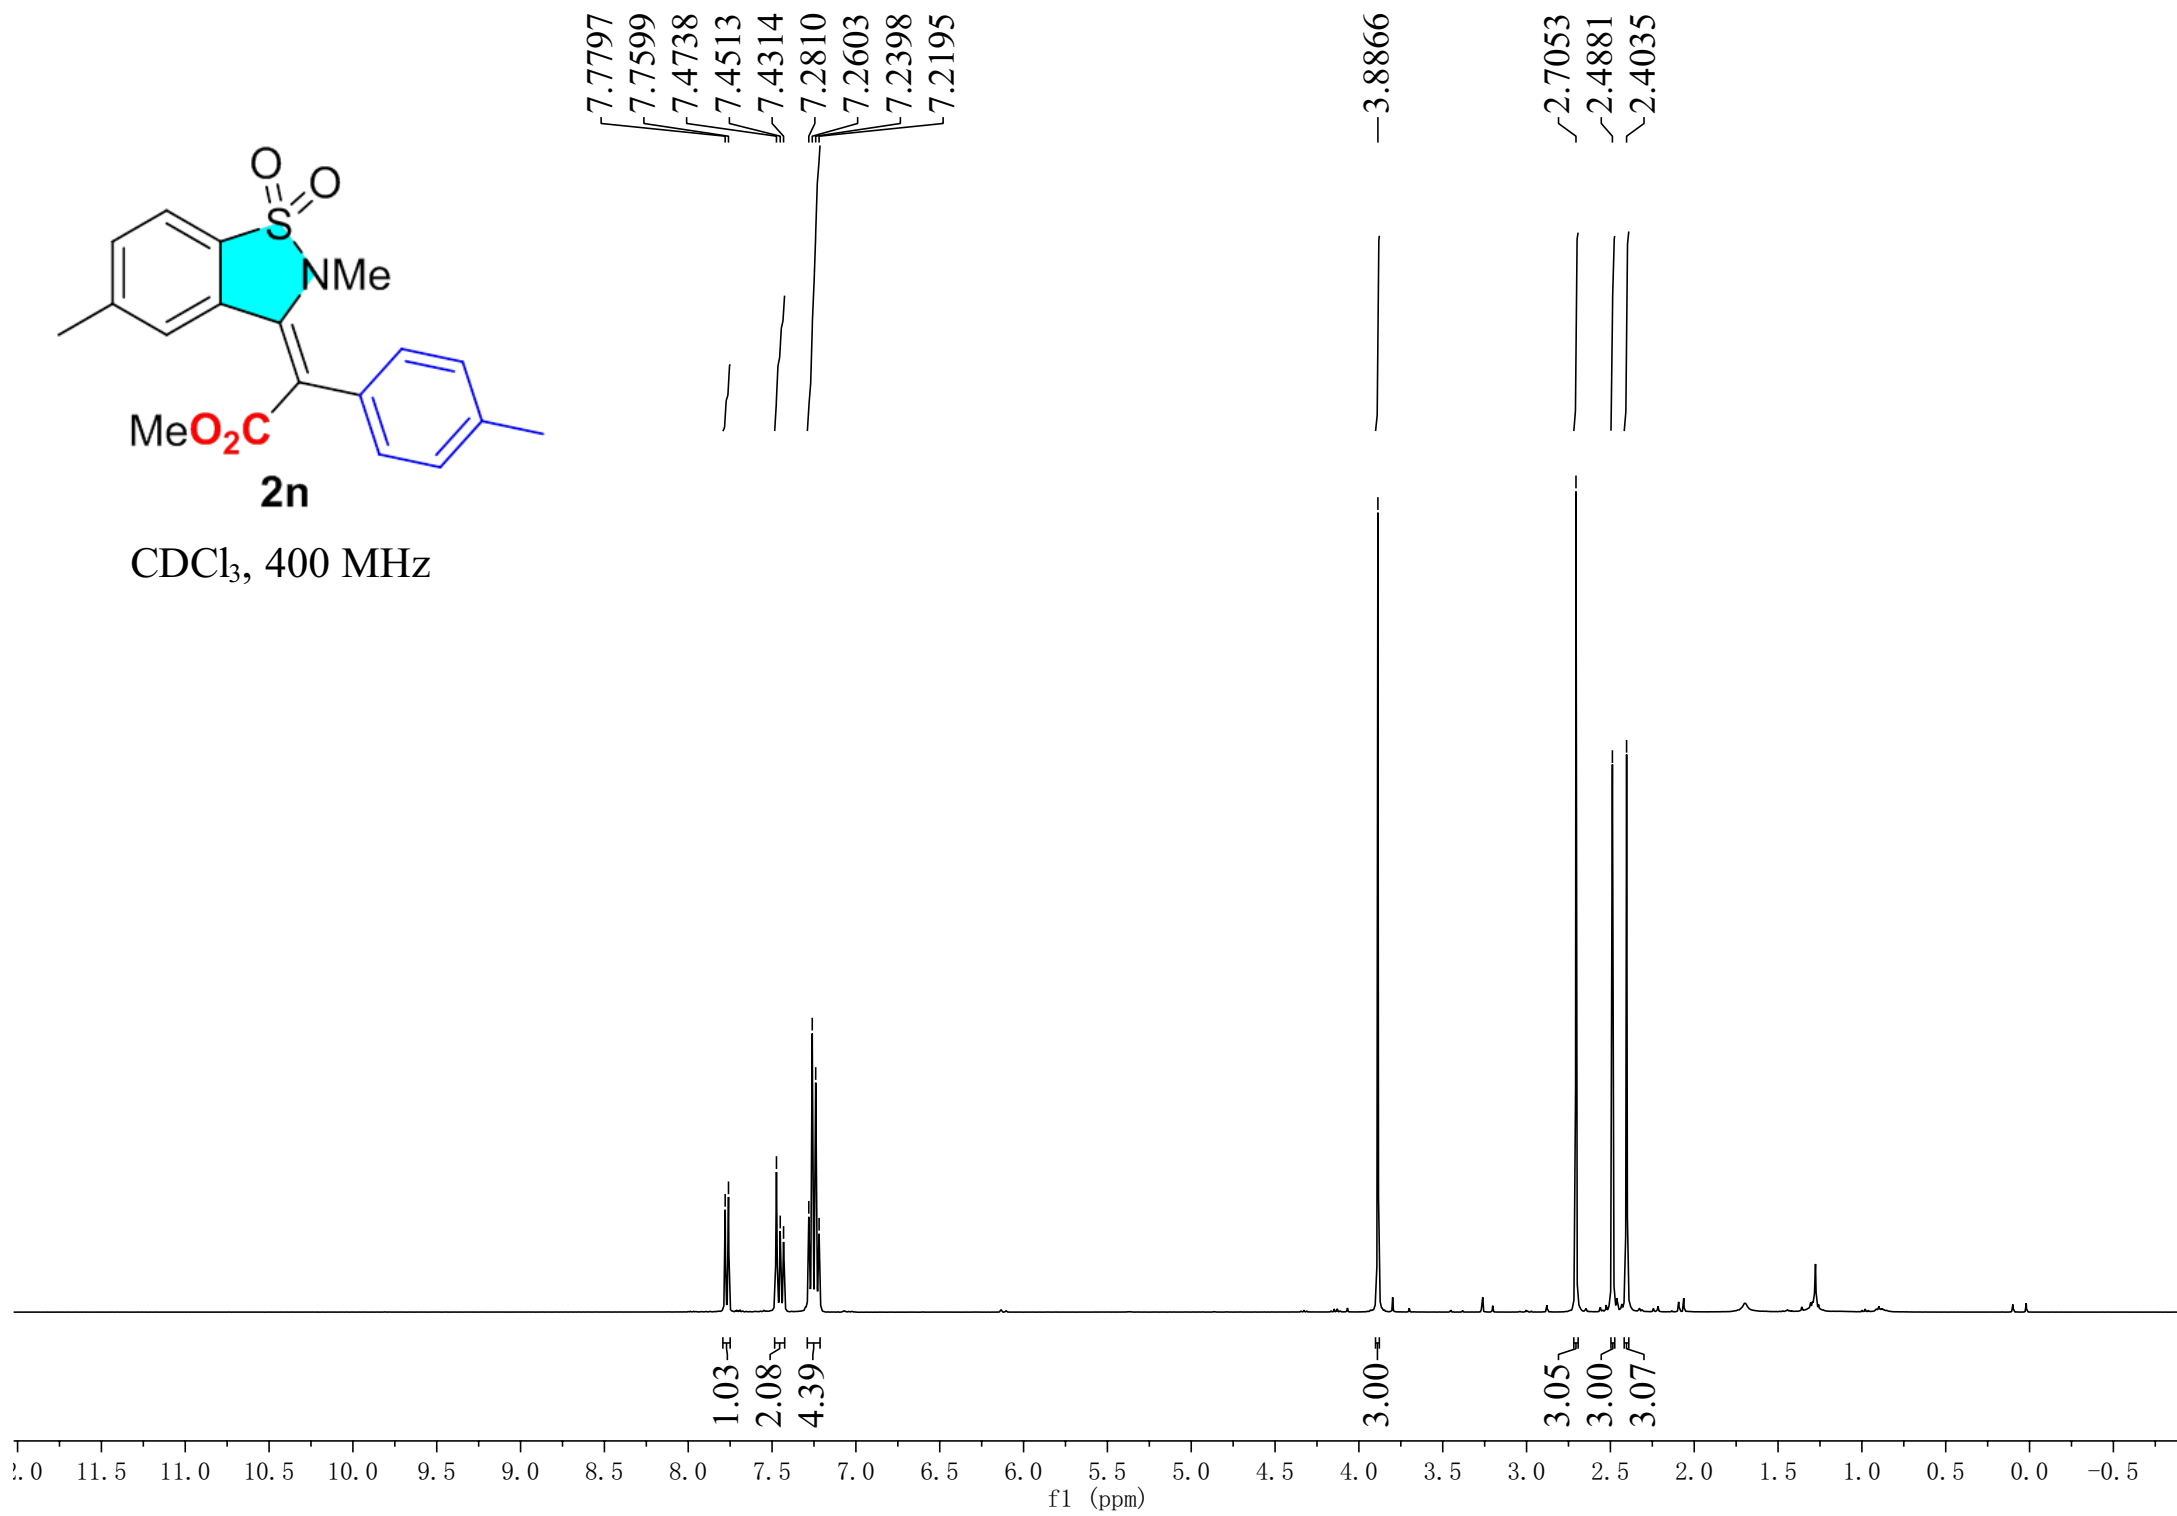



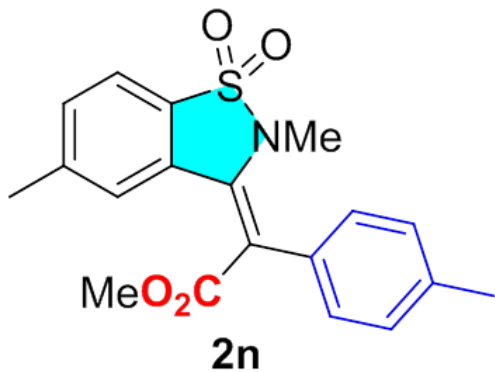

CDCl<sub>3</sub>, 101 MHz

-169.69

143.97

138.58

137.02

131.77

130.41

129.84

129.61

129.37

124.53

121.10

113.47

77.32

77.00

76.68

-52.89

-31.78

22.15

21.29

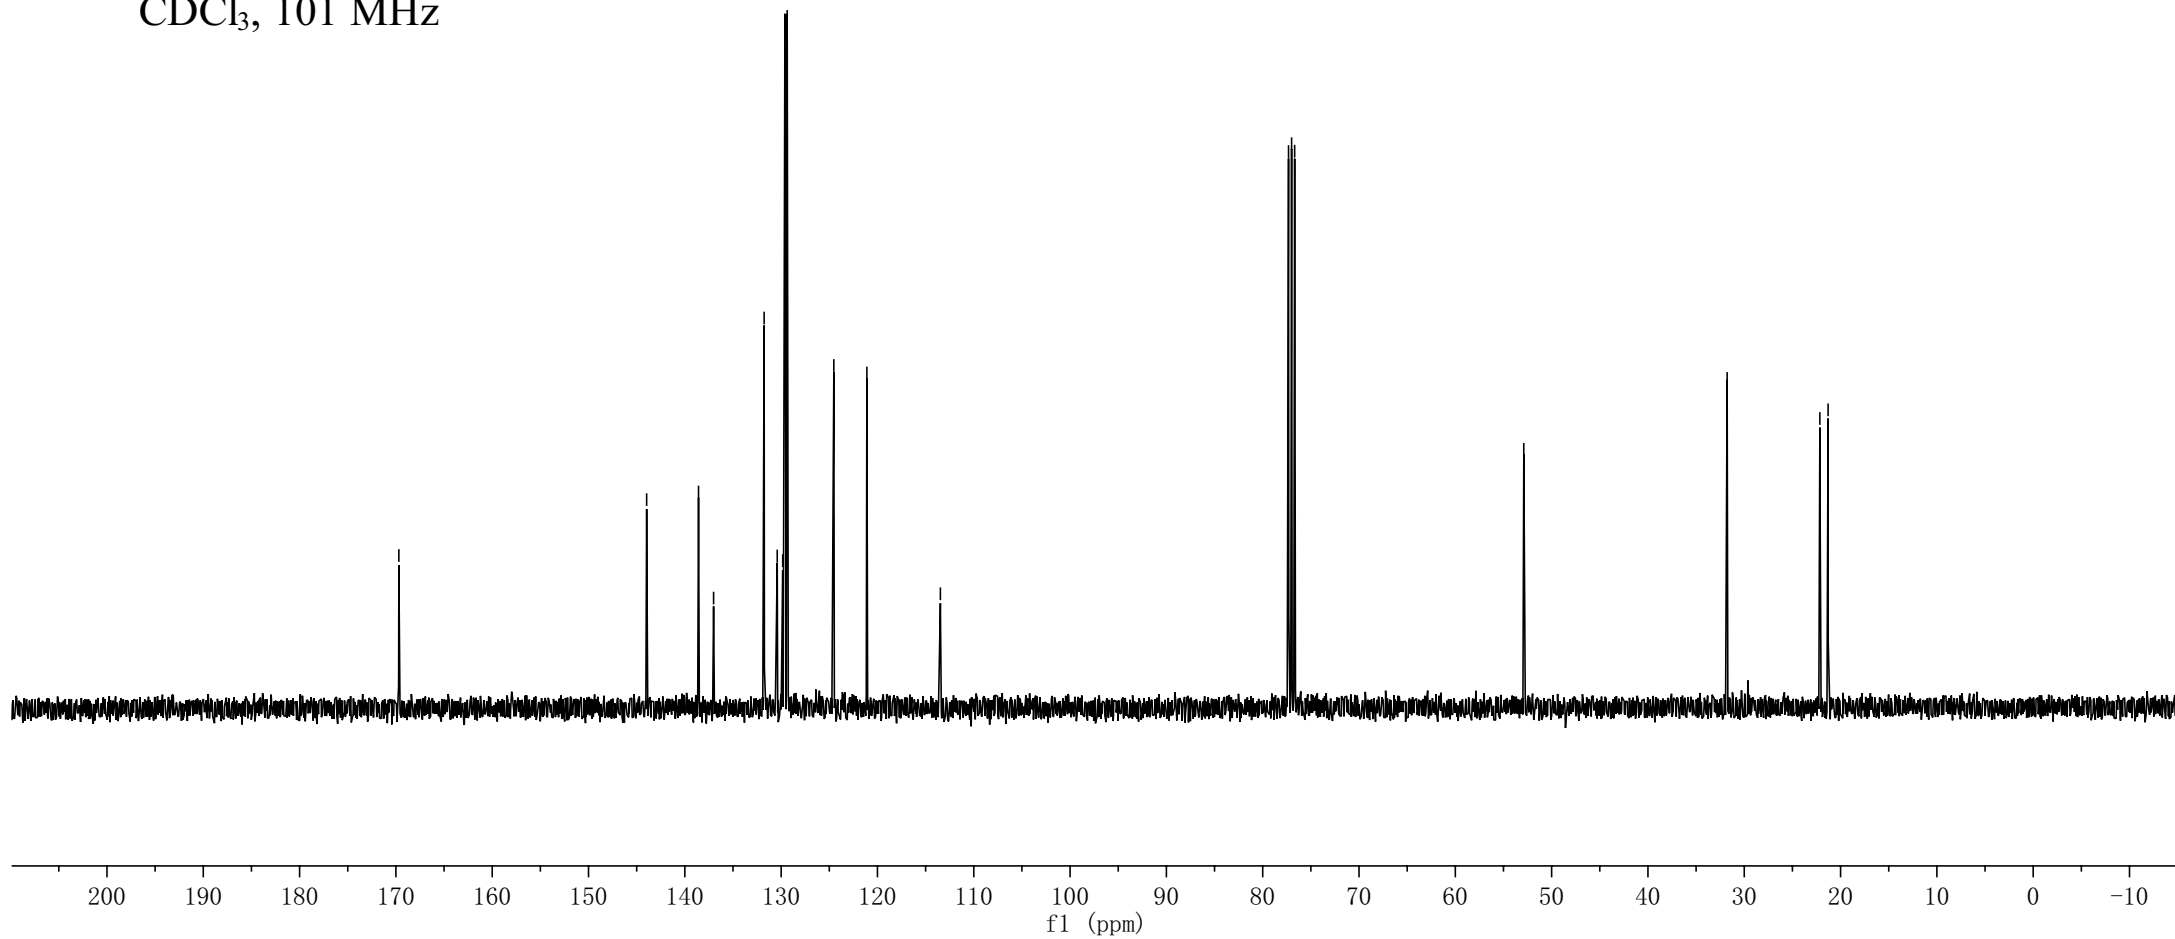

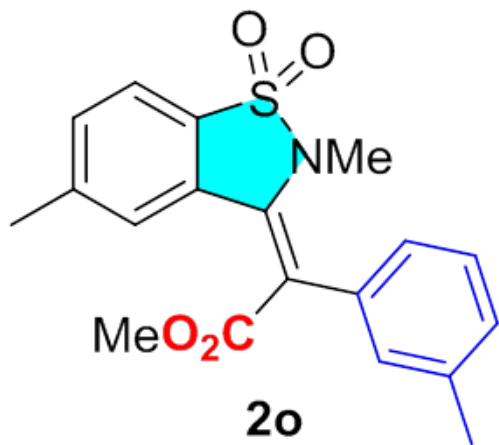

CDCl<sub>3</sub>, 400 MHz

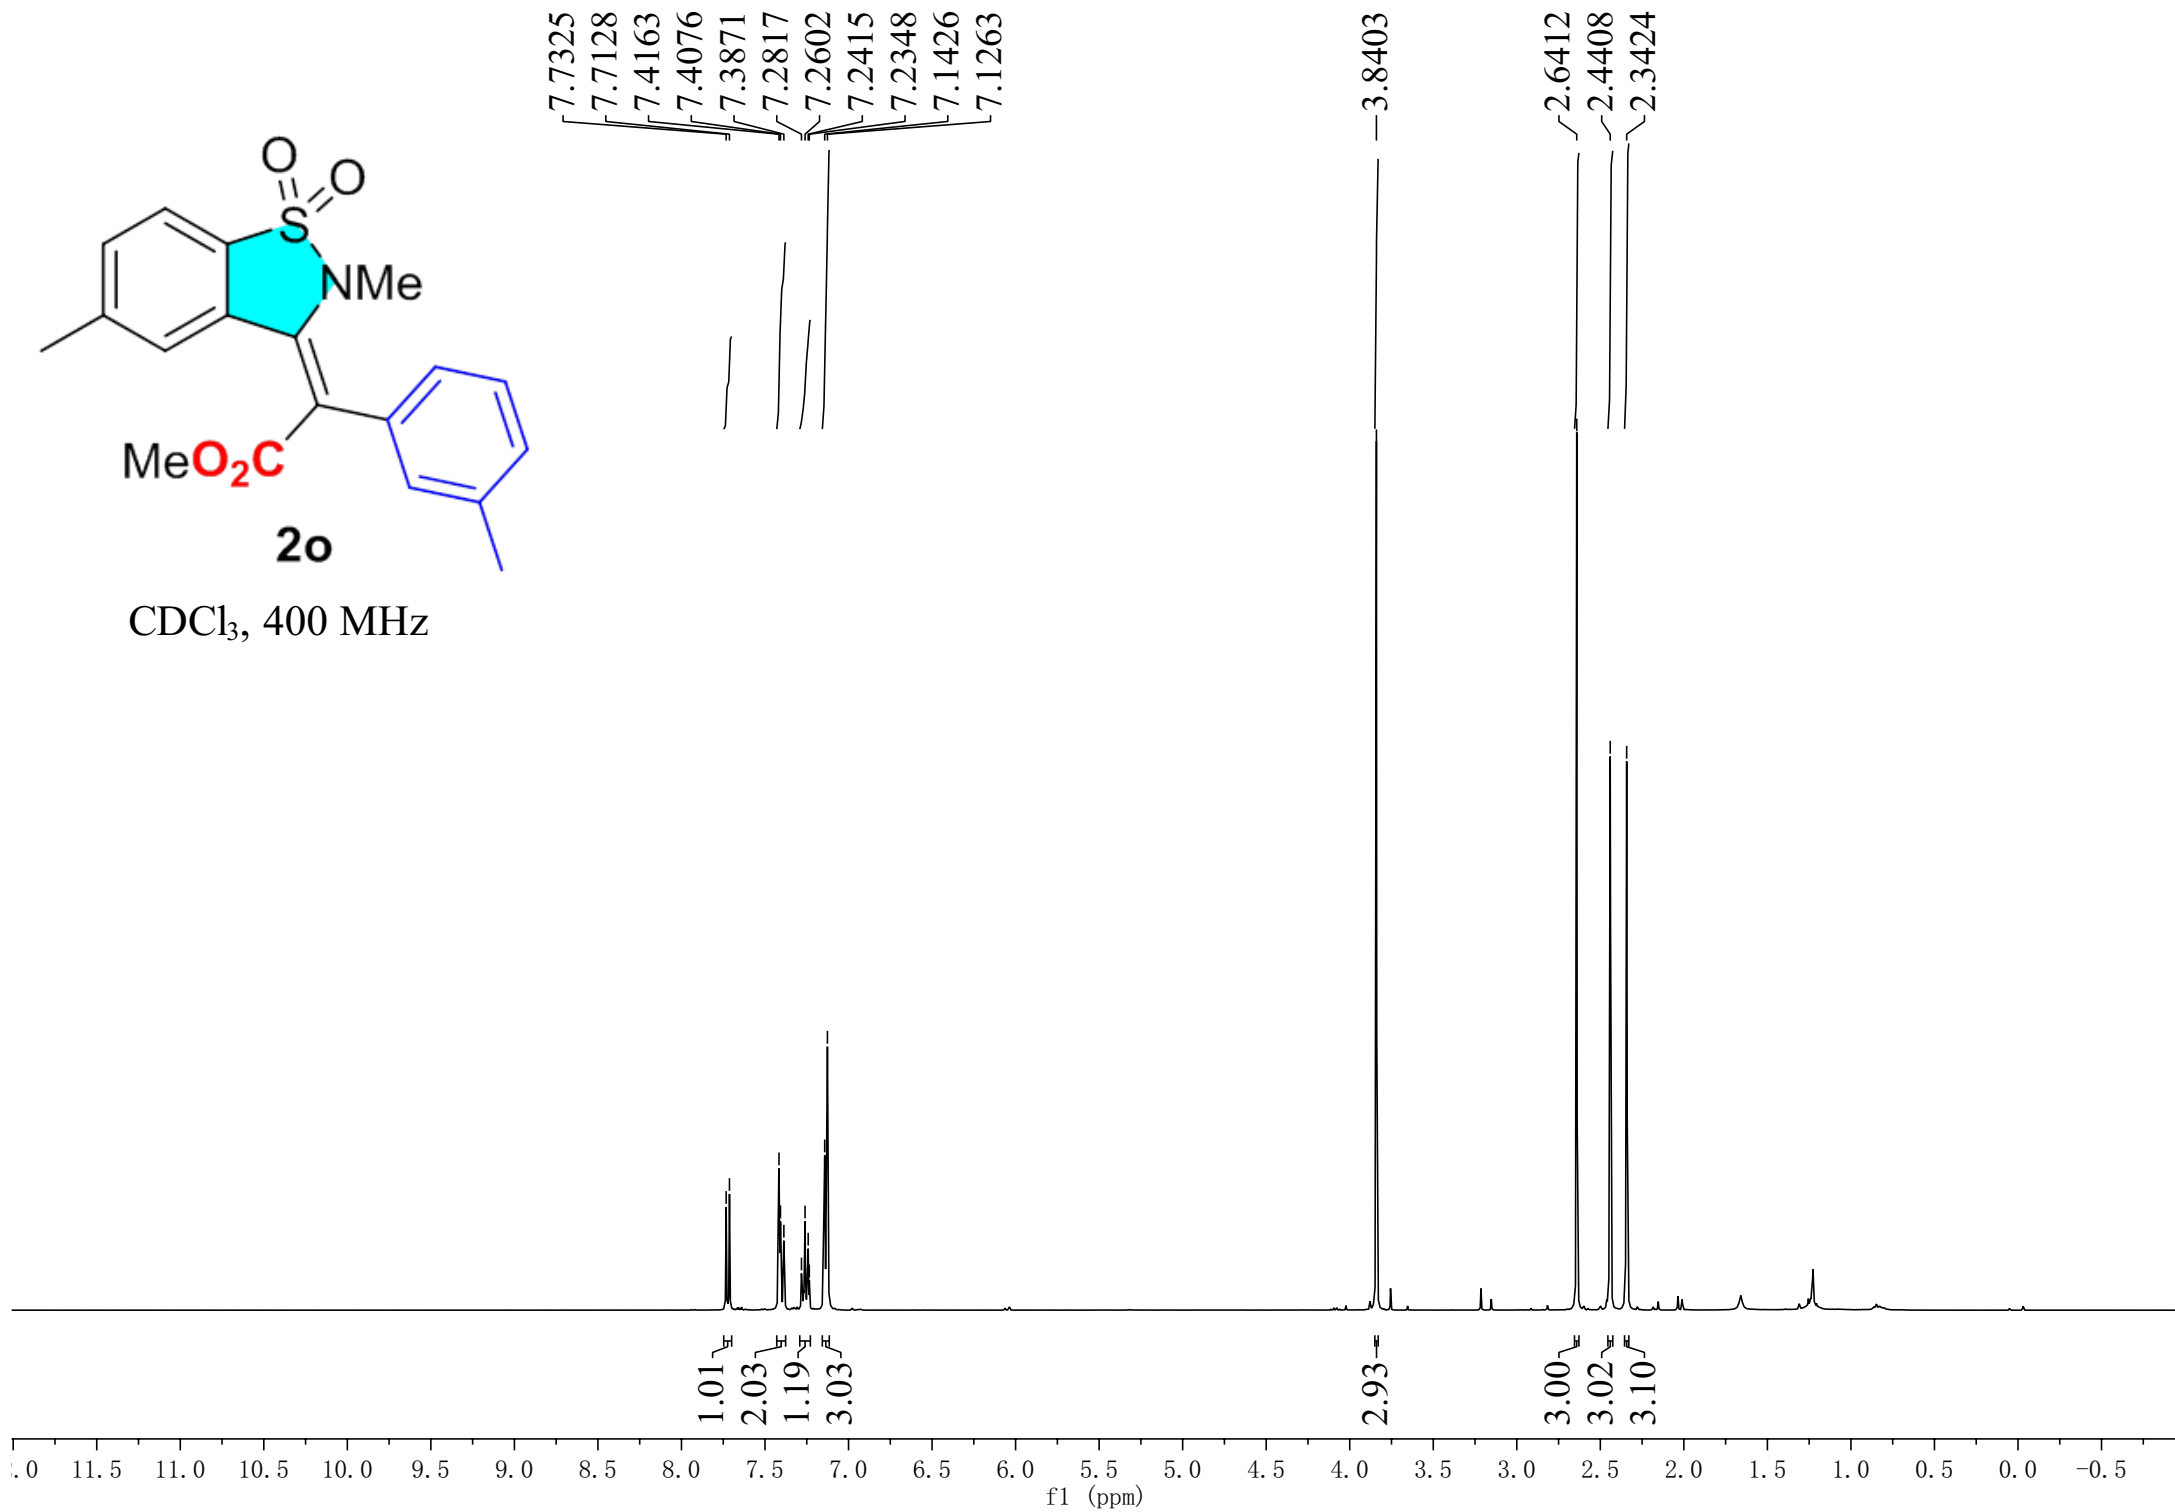

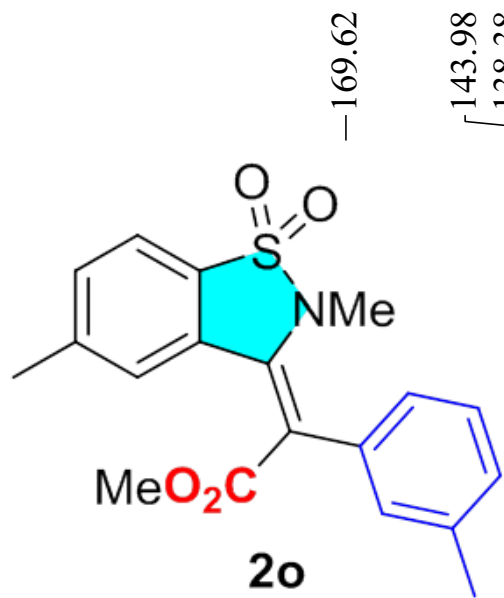

CDCl<sub>3</sub>, 101 MHz

169.62  
143.98  
138.38  
136.89  
134.59  
131.81  
130.30  
130.15  
129.80  
129.33  
128.51  
126.90  
124.52  
121.10  
113.36  
77.32  
77.00  
76.68  
52.91  
31.65  
22.14  
21.36

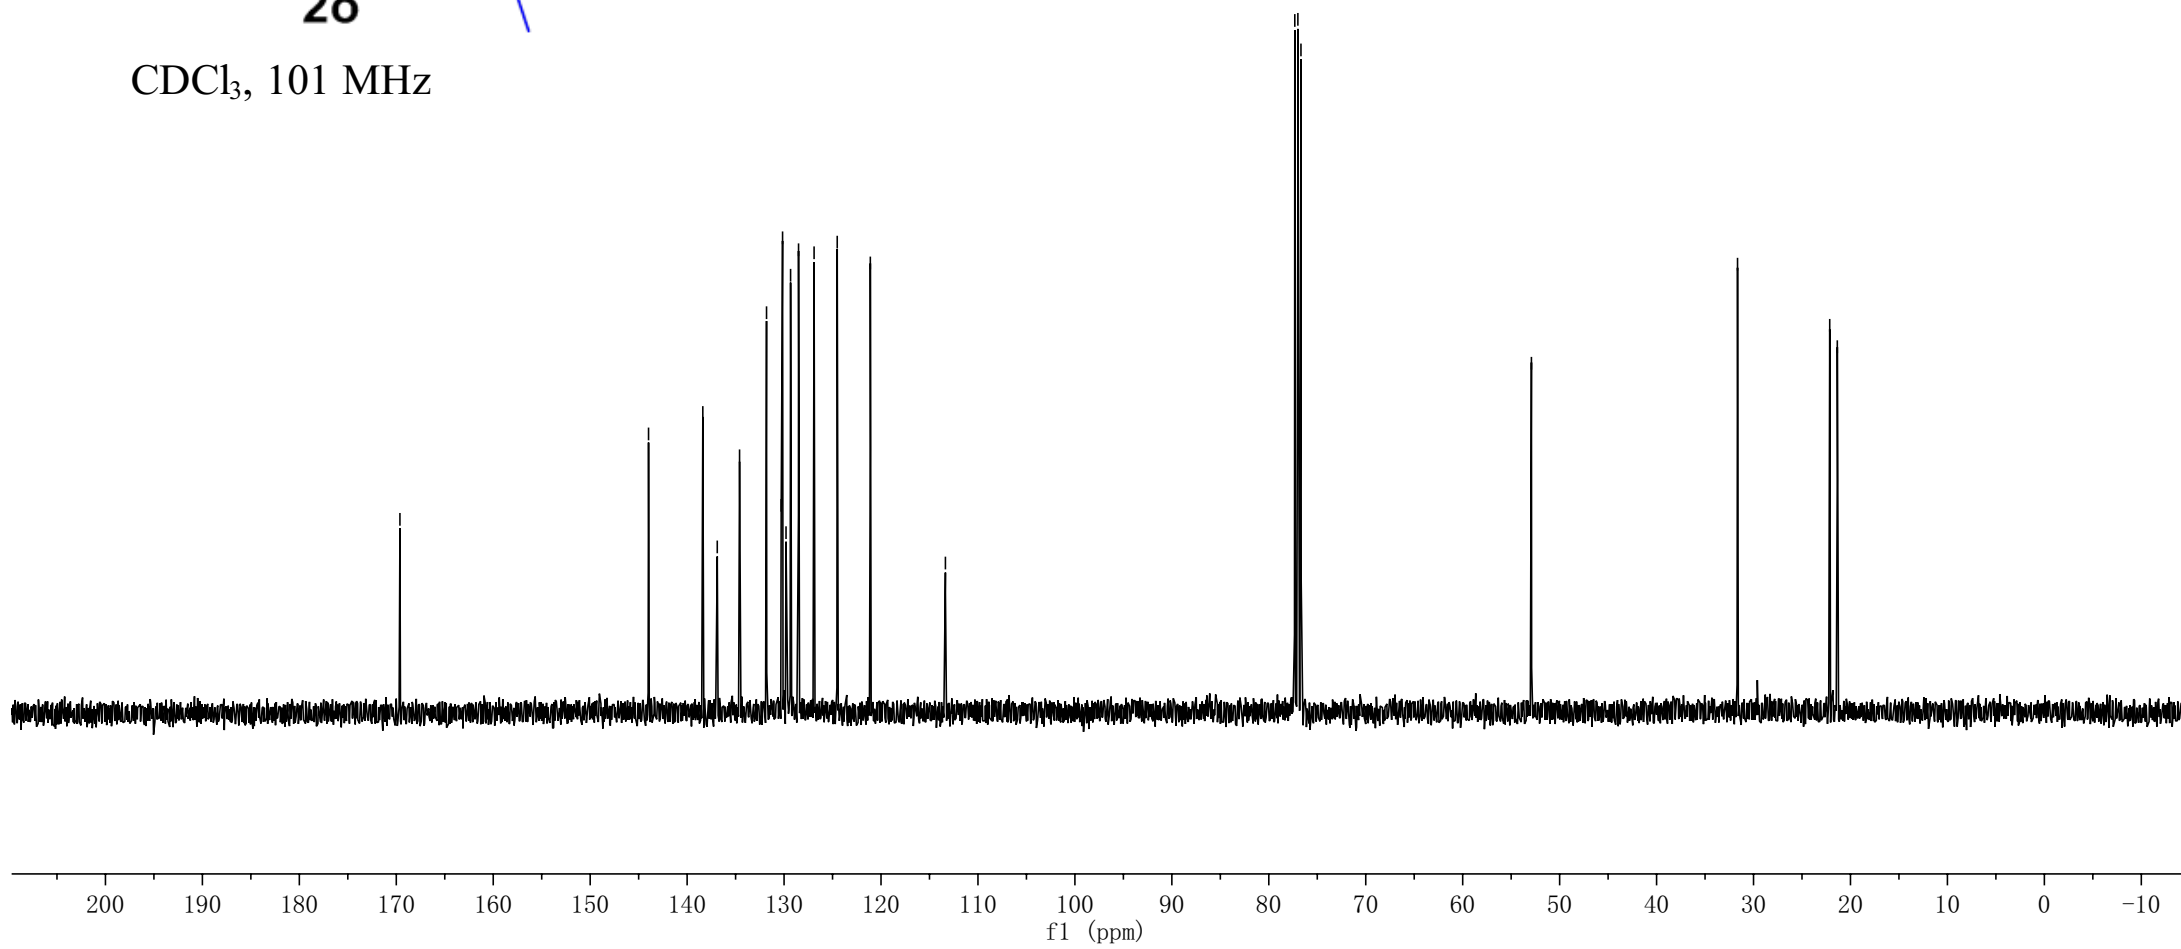

7.7185  
7.6987  
7.4520  
7.4492  
7.4468  
7.4438  
7.4108  
7.3916  
7.3448  
7.3403  
7.3355  
7.3293  
7.3270  
7.3254  
7.3108  
7.3090  
7.3074  
7.2600  
7.2369  
7.2335  
7.2146  
6.1201  
6.1180  
6.1158

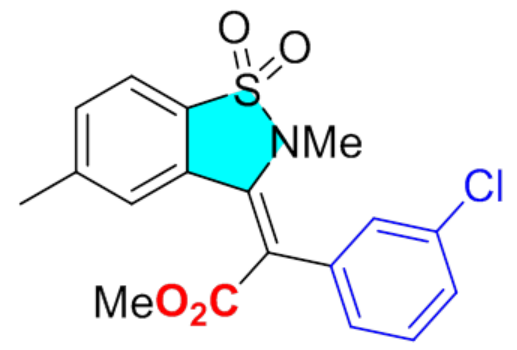

2p

CDCl<sub>3</sub>, 400 MHz

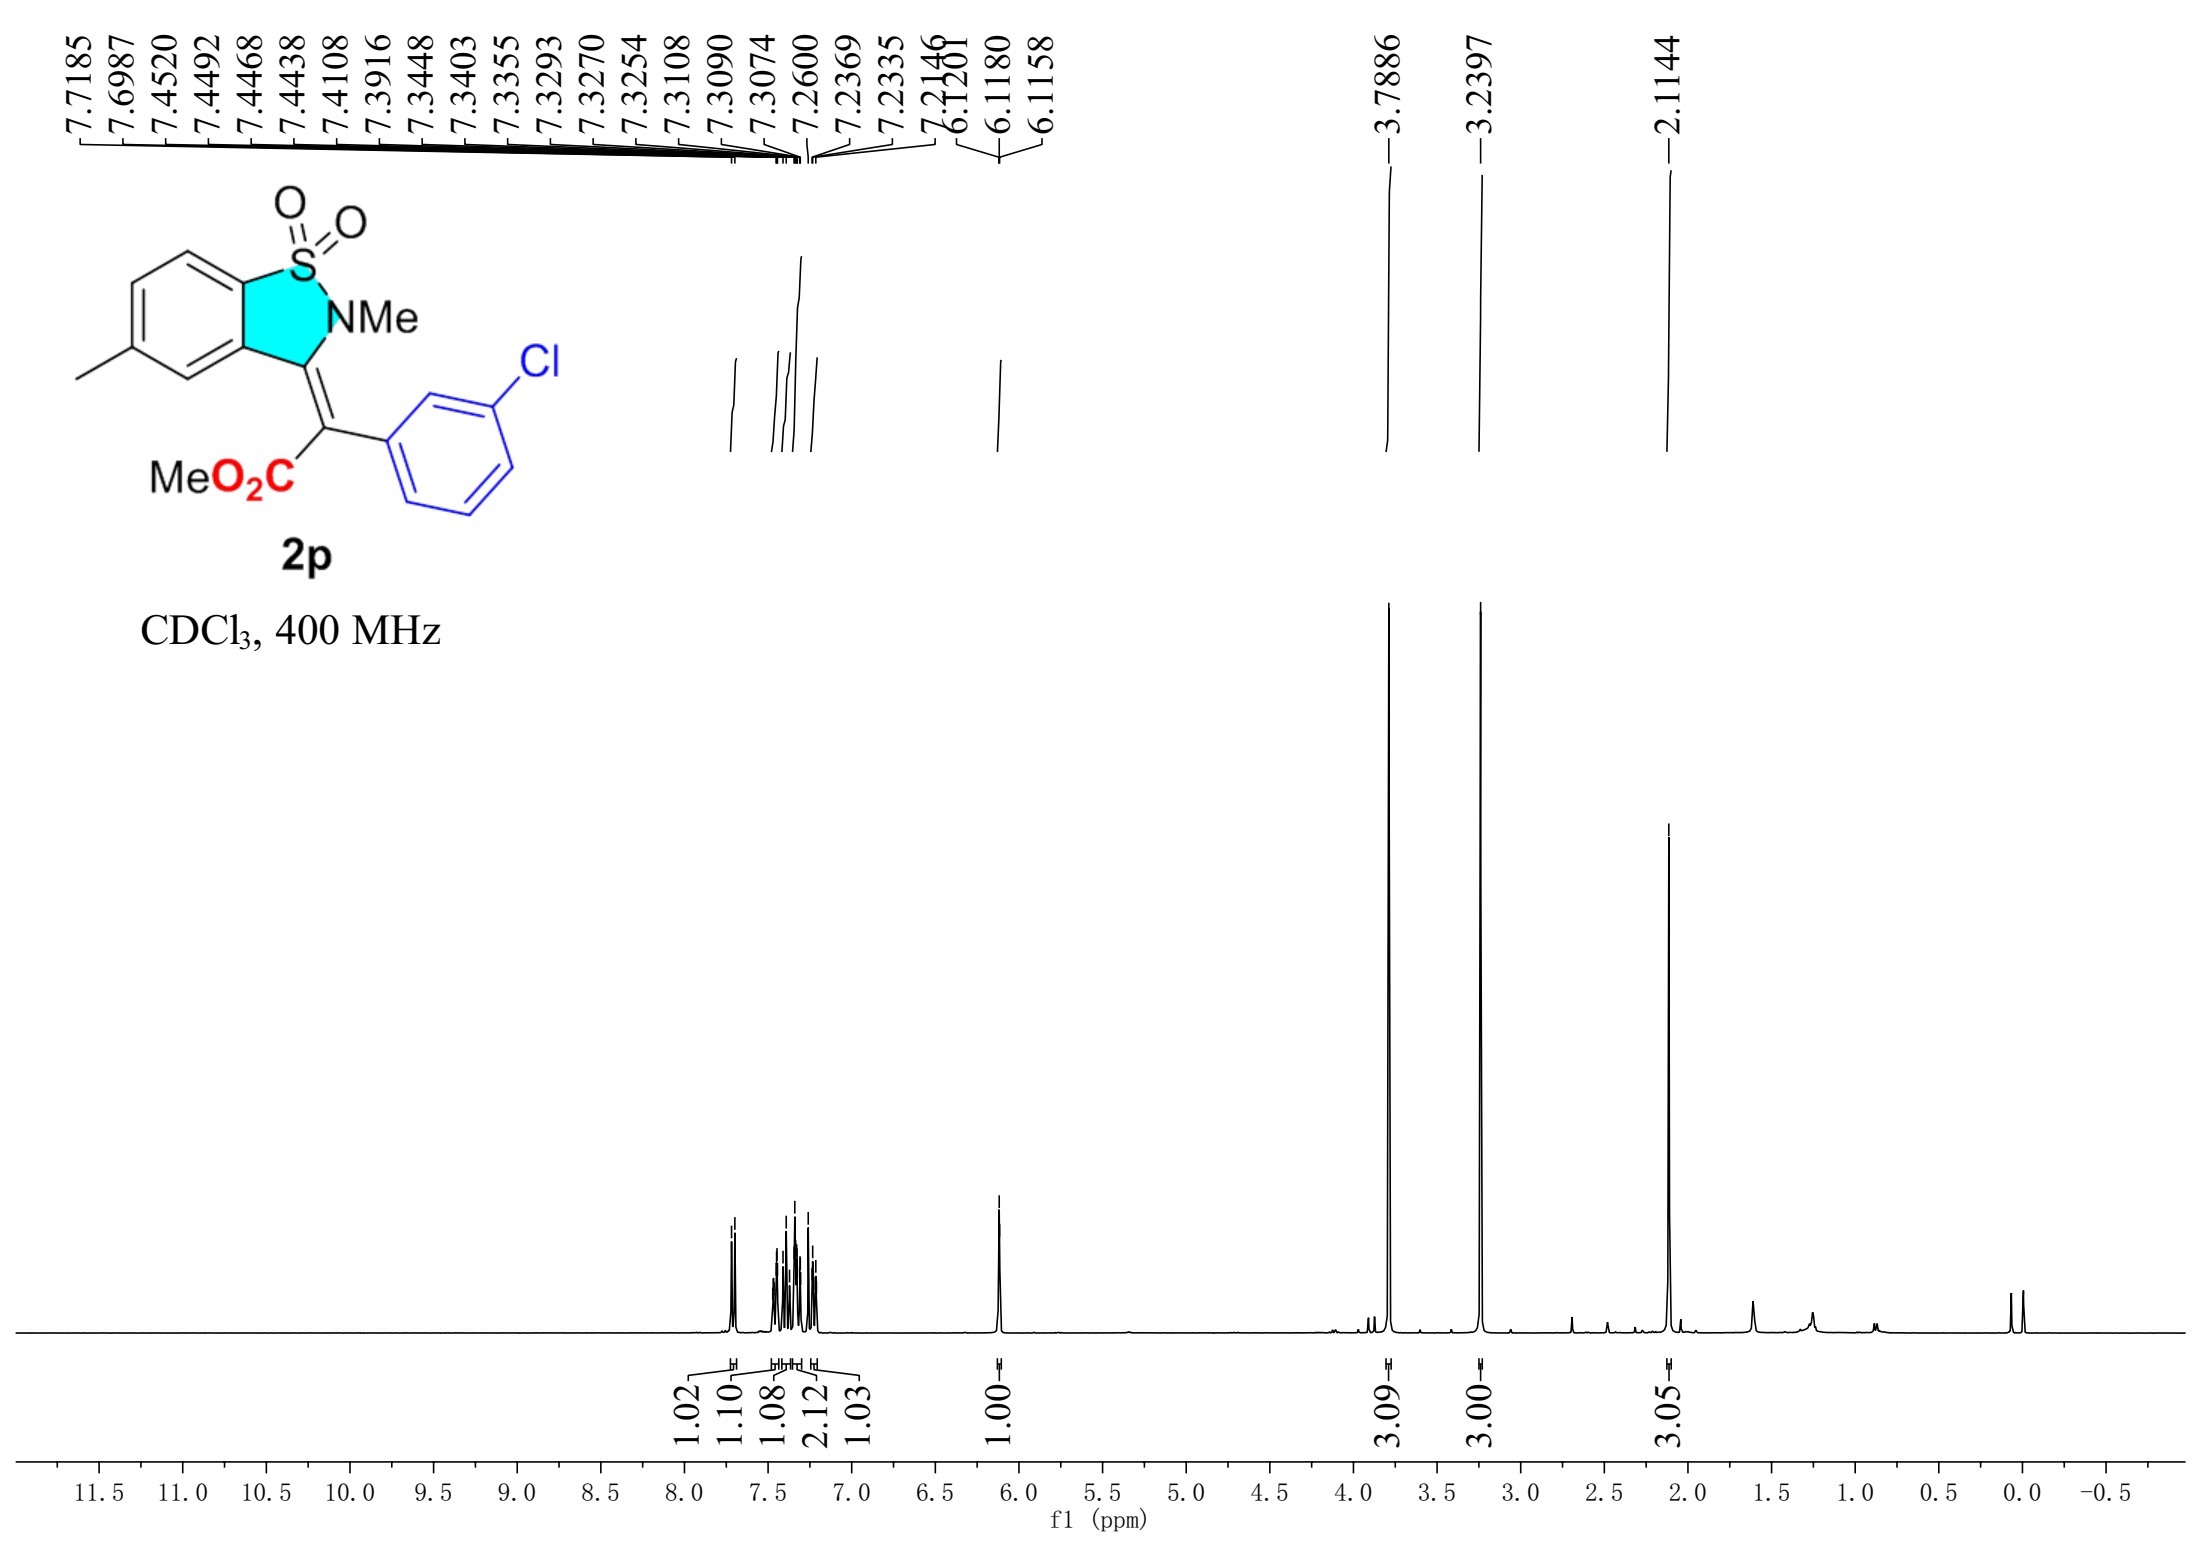

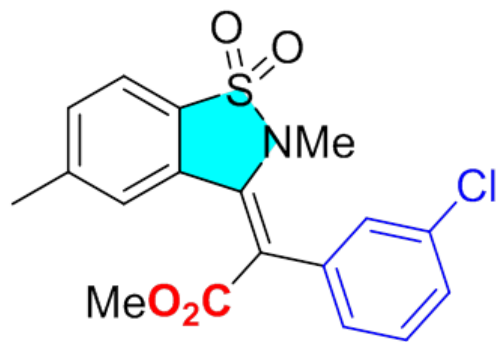

2p

CDCl<sub>3</sub>, 101 MHz

167.20  
143.81  
139.42  
138.05  
135.18  
131.97  
130.83  
130.61  
130.27  
129.95  
129.07  
128.95  
127.00  
121.23  
-109.77

77.38  
77.06  
76.74

-52.68

-30.60

-22.03

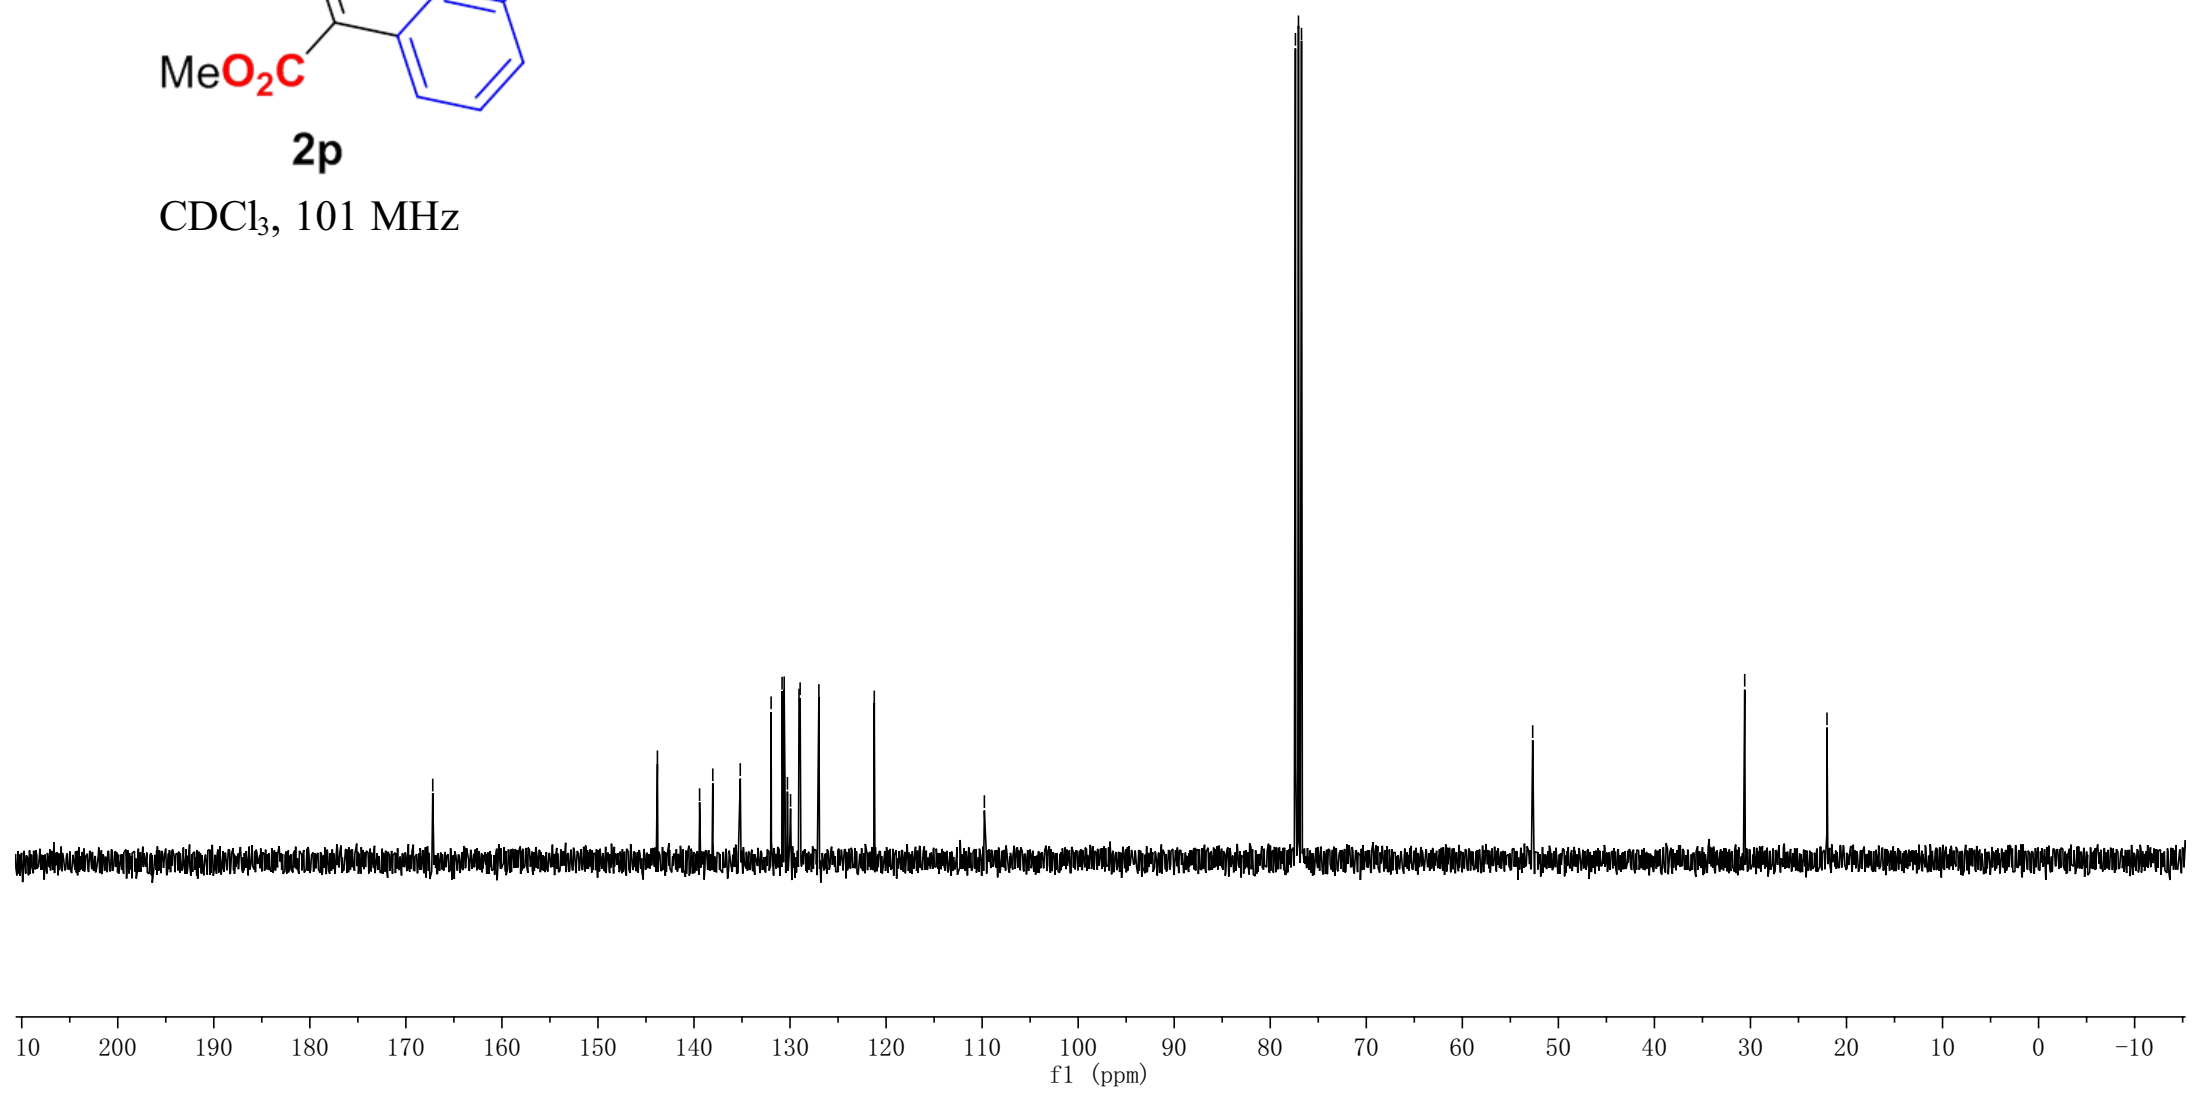

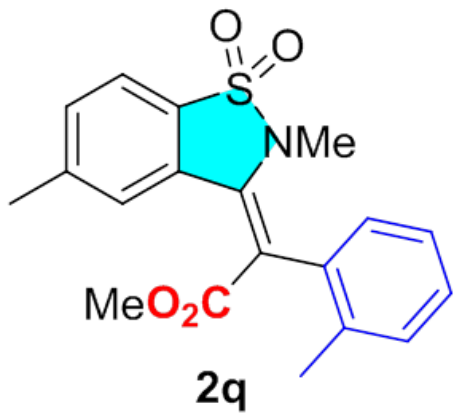

CDCl<sub>3</sub>, 400 MHz

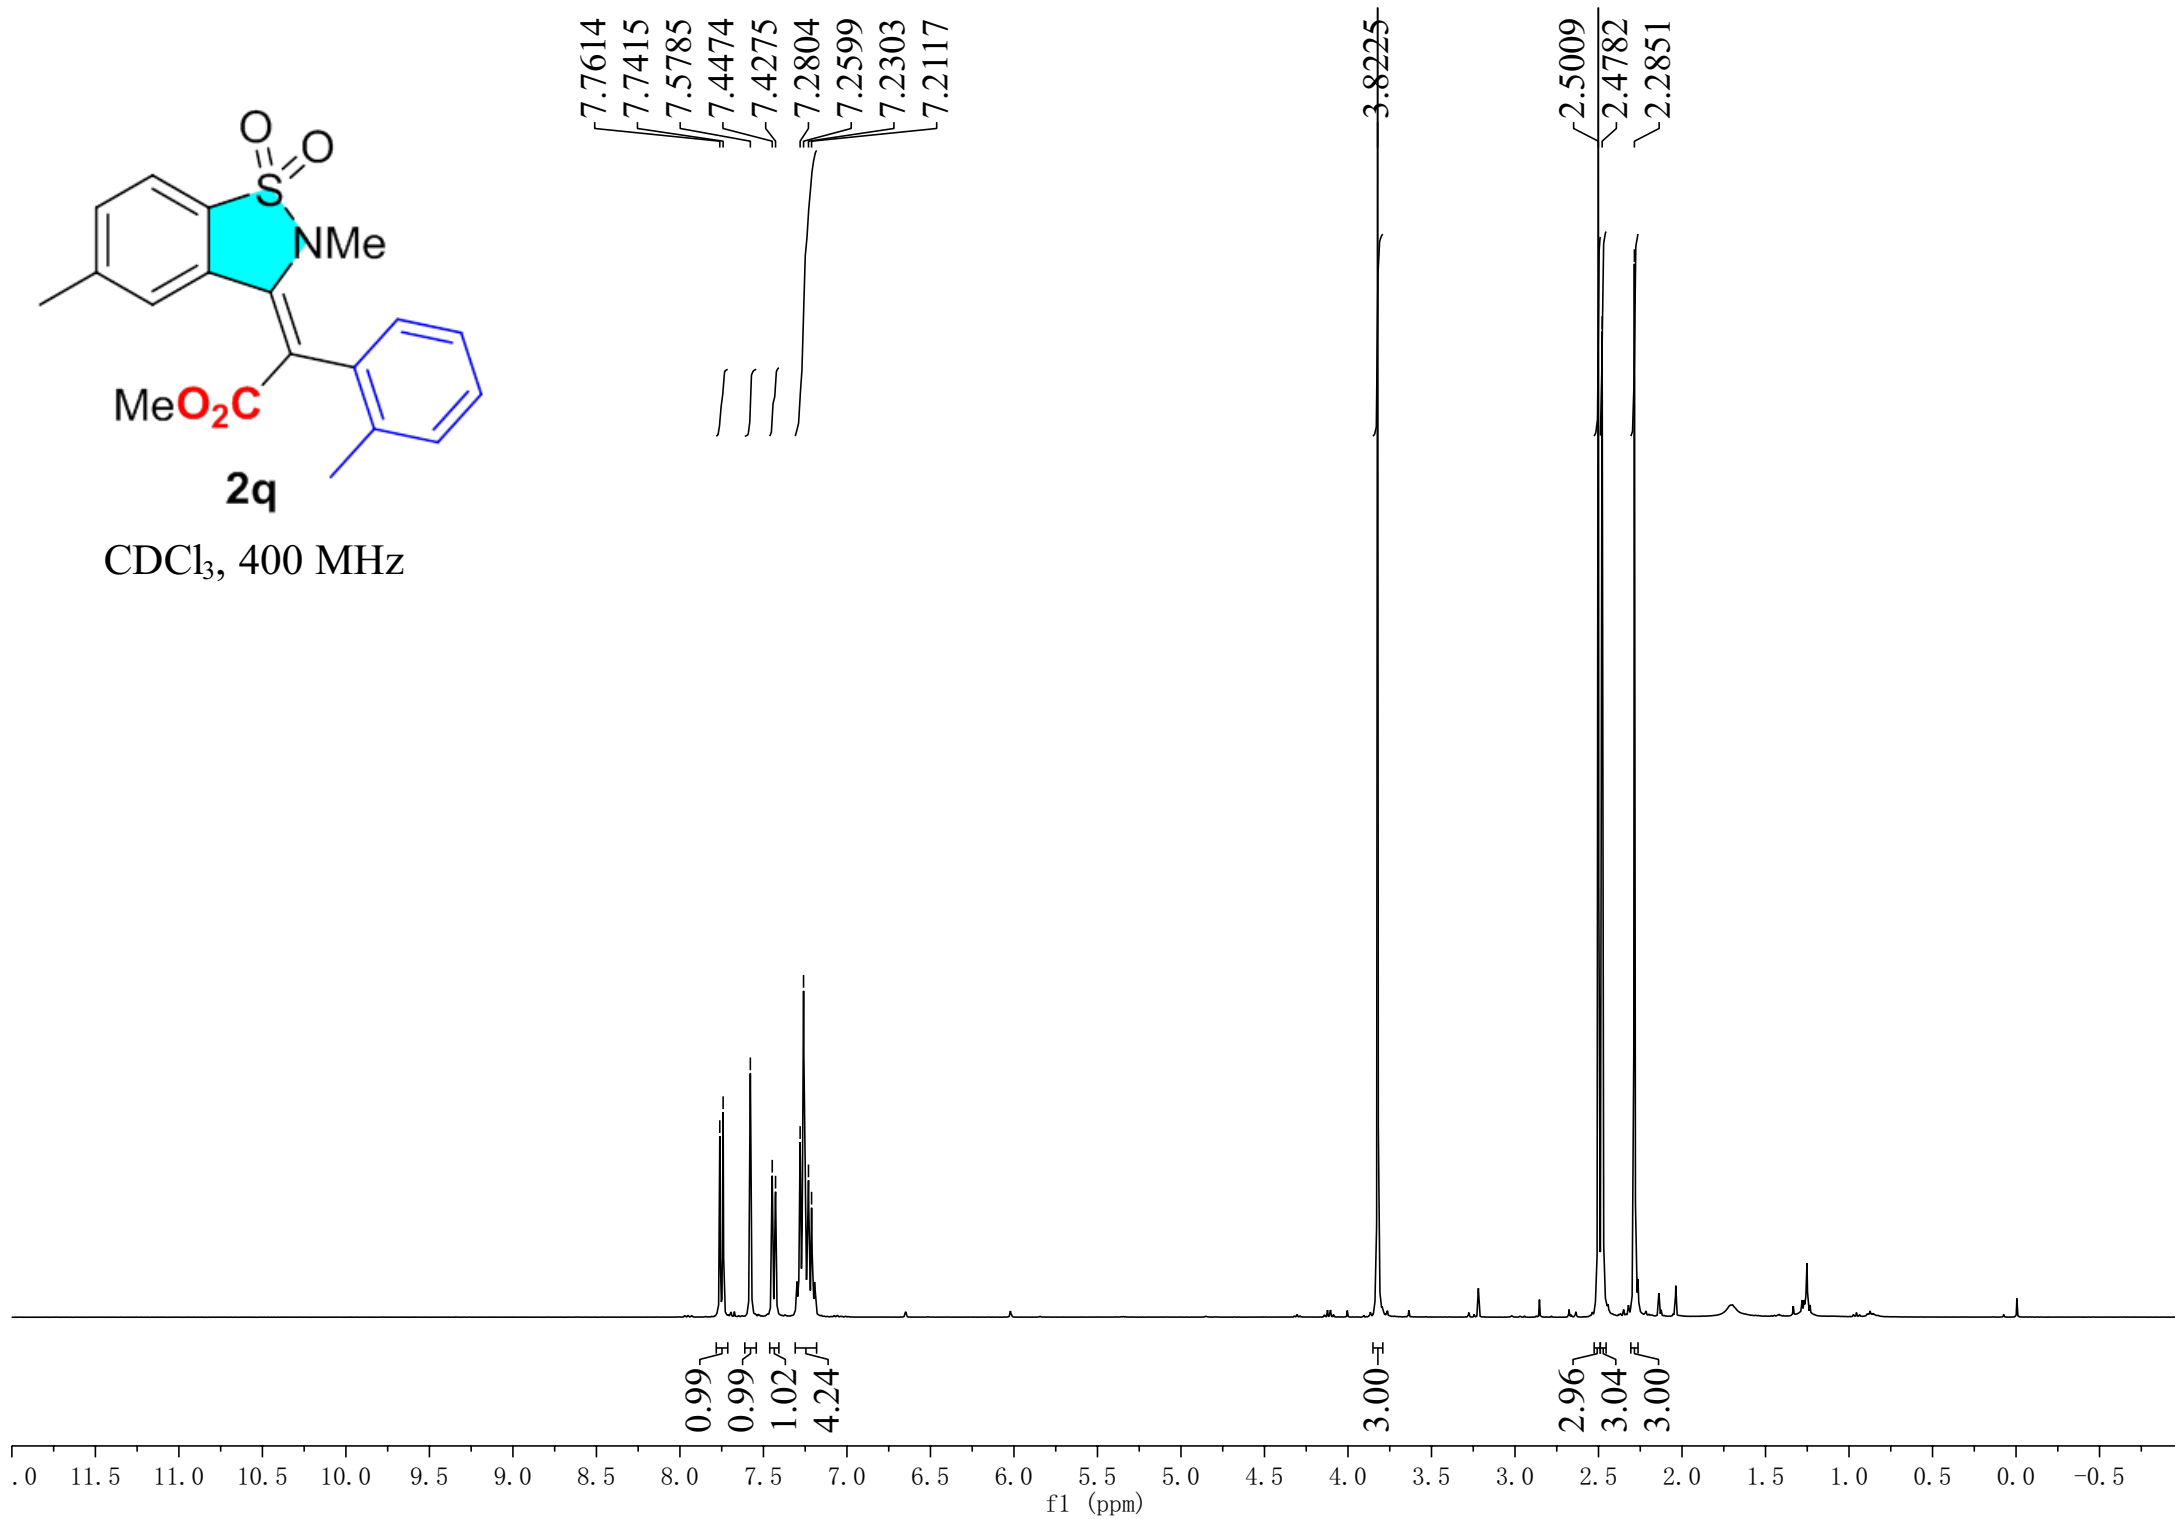

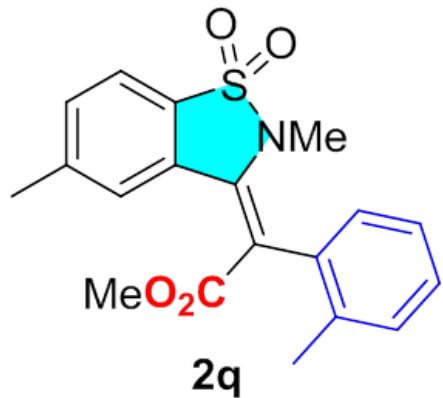

CDCl<sub>3</sub>, 101 MHz

169.26  
144.01  
138.03  
137.74  
134.38  
131.91  
130.63  
130.34  
129.80  
129.72  
128.86  
126.01  
125.12  
121.09  
-111.87

77.32  
77.00  
76.68

-52.78

~30.07  
22.16  
19.80

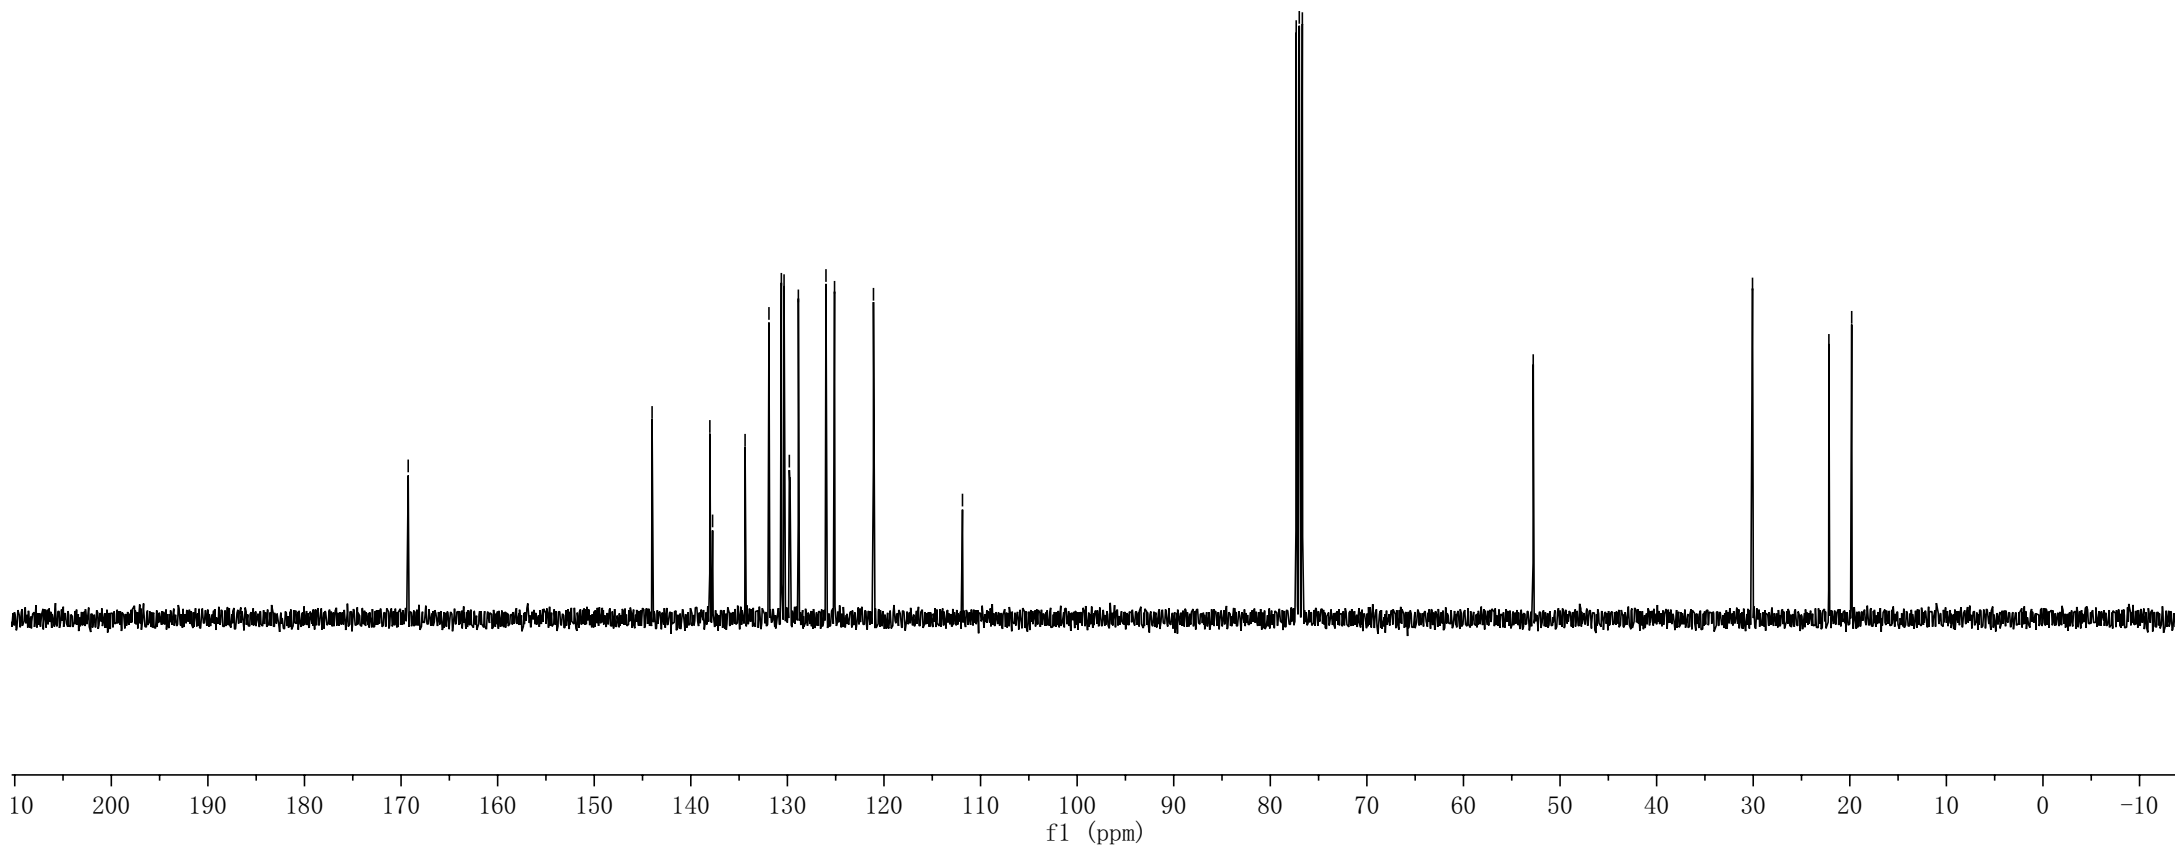

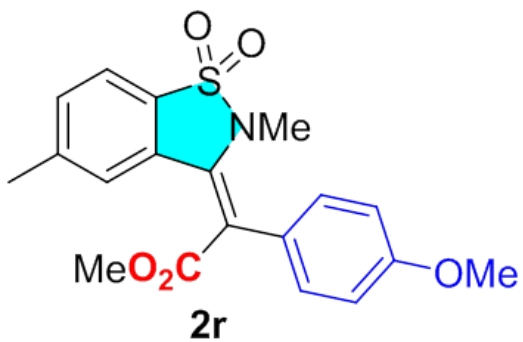

CDCl<sub>3</sub>, 400 MHz

7.7595  
7.7397  
7.4394  
7.4290  
7.4084  
7.3009  
7.2958  
7.2790  
7.2700  
6.9456  
6.9406  
6.9287  
6.9237

3.8732  
3.8413  
2.7027  
2.4685

1.04  
2.10  
2.19  
2.13

3.08  
3.12

3.00  
3.08

11.5 11.0 10.5 10.0 9.5 9.0 8.5 8.0 7.5 7.0 6.5 6.0 5.5 5.0 4.5 4.0 3.5 3.0 2.5 2.0 1.5 1.0 0.5 0.0 -0.5

f1 (ppm)



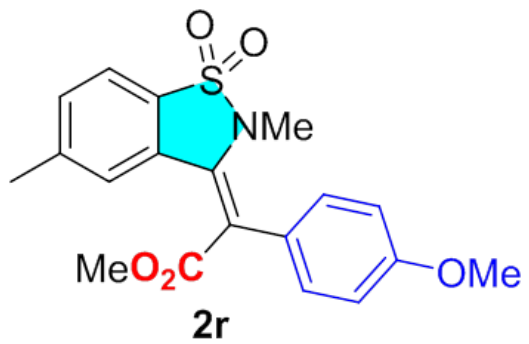

CDCl<sub>3</sub>, 101 MHz

—169.75  
—159.59  
143.95  
136.87  
131.71  
131.03  
130.49  
129.86  
126.81  
124.47  
121.10  
114.11  
113.39

77.32  
77.00  
76.68

~55.26  
~52.89

—31.82

—22.15

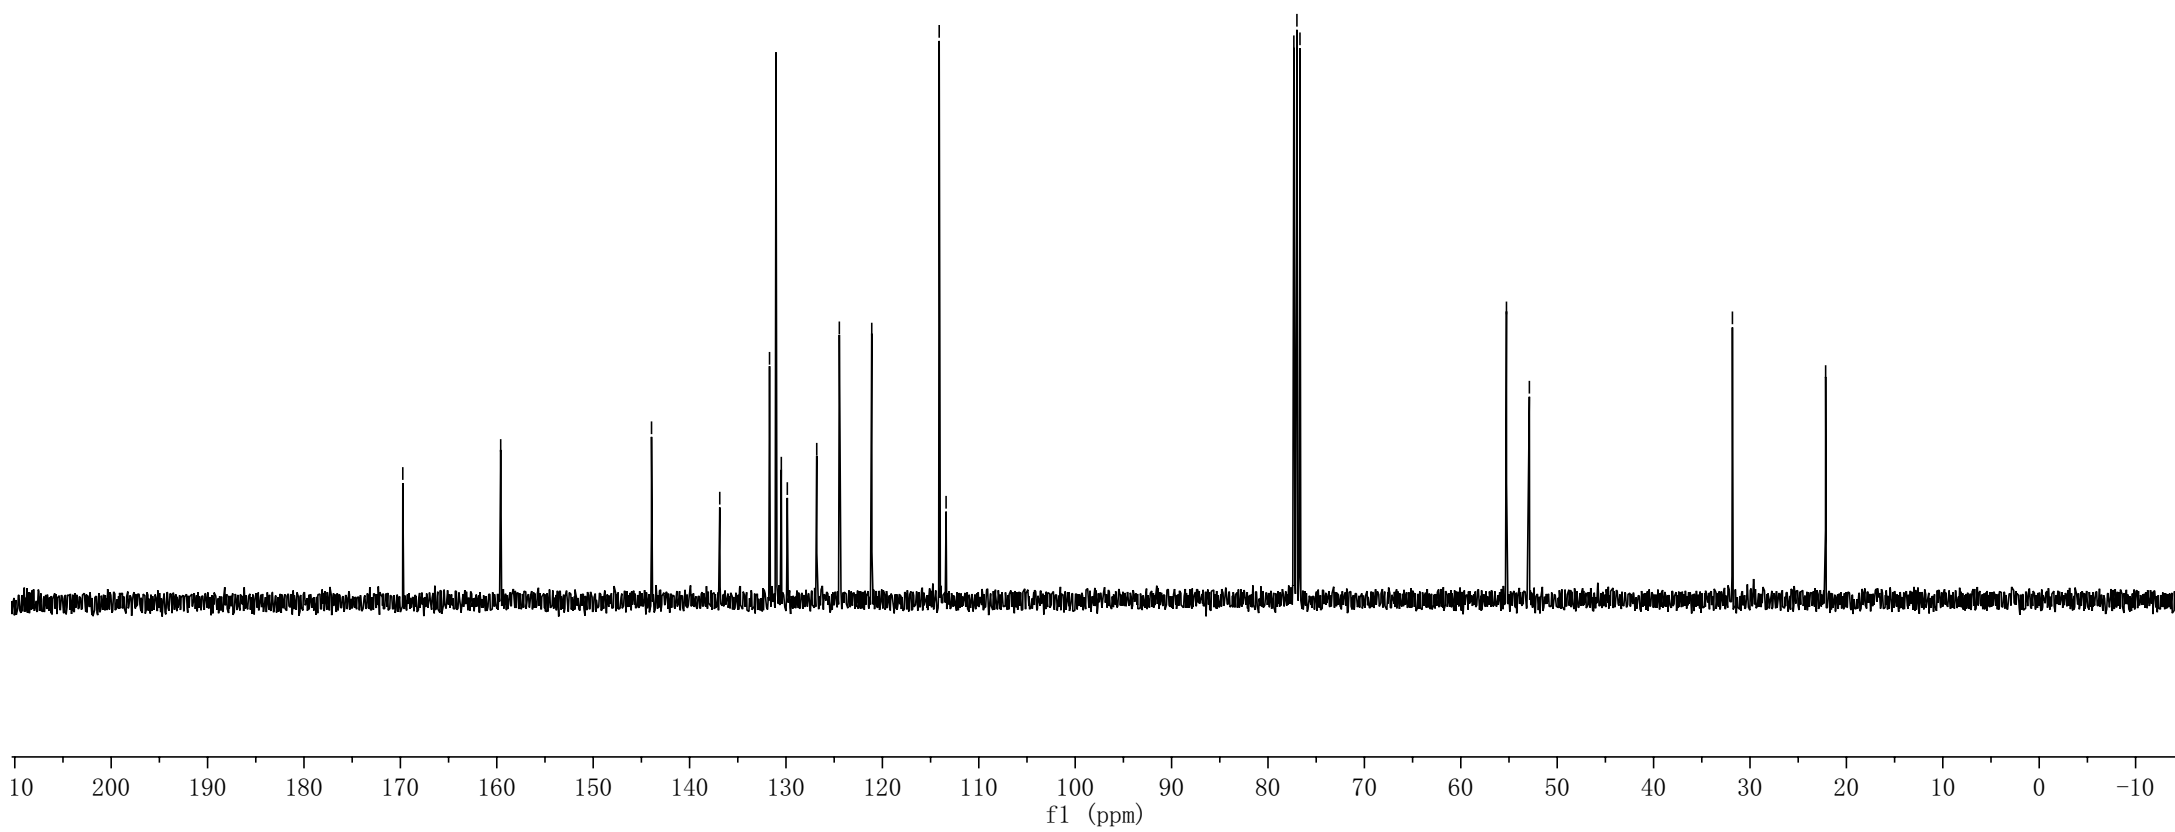

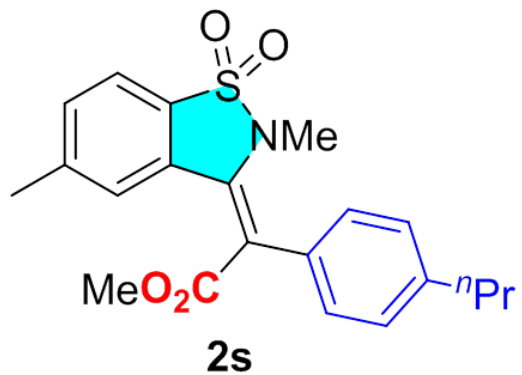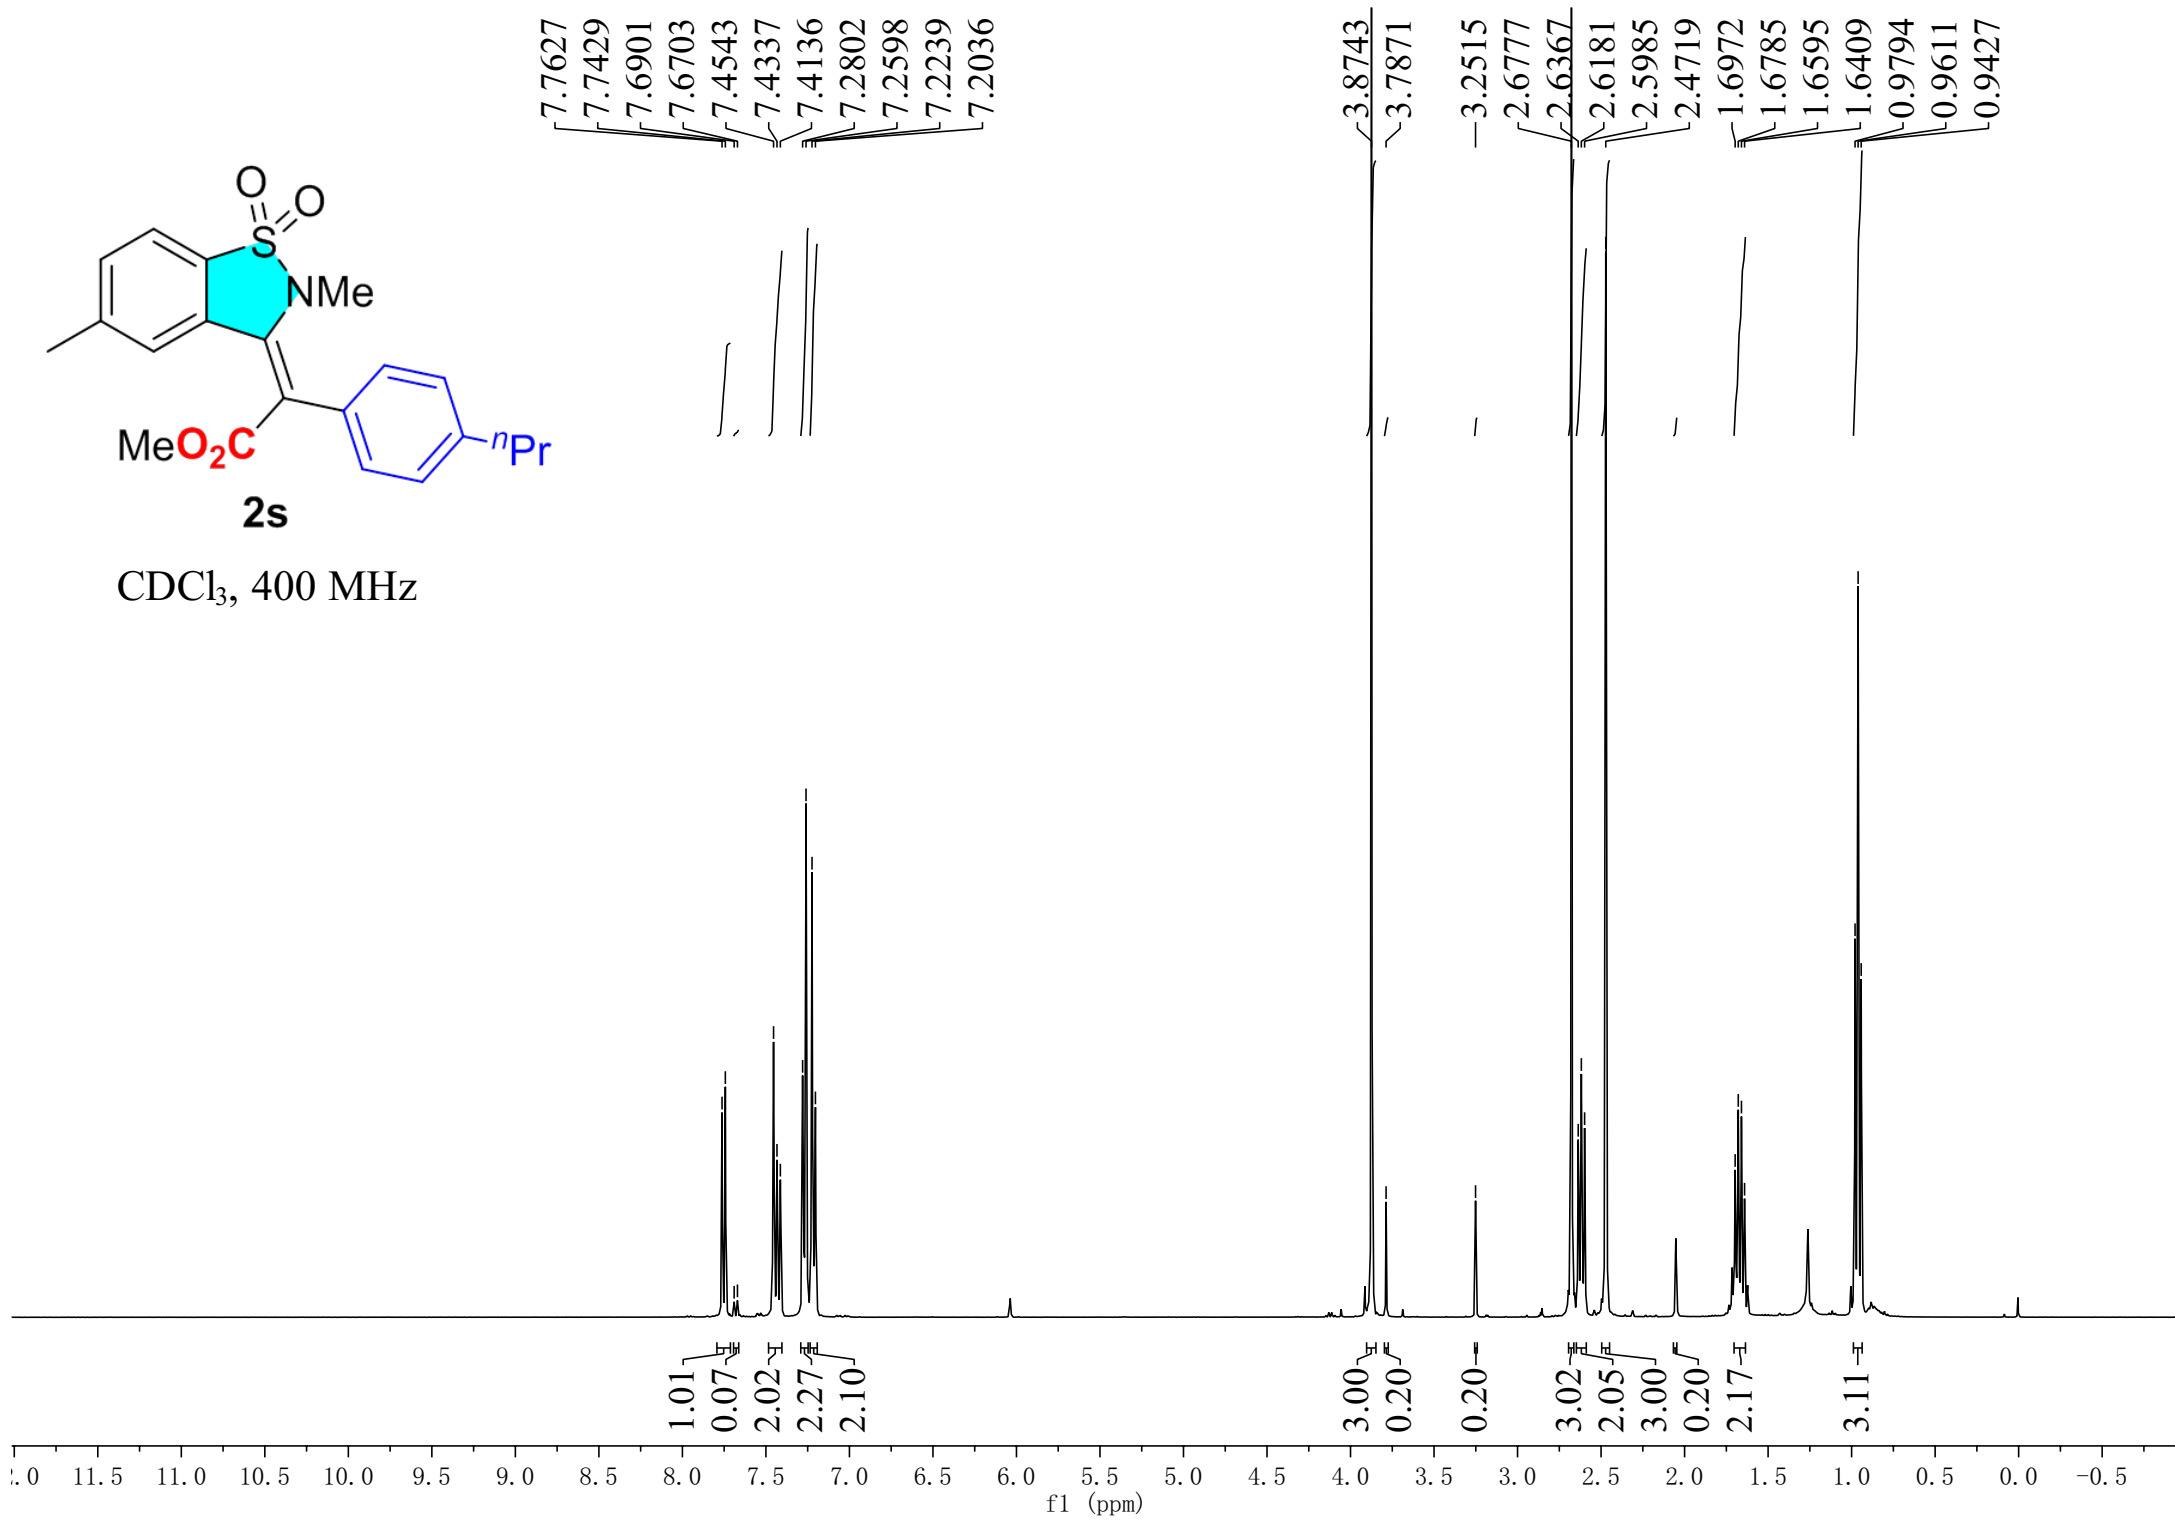

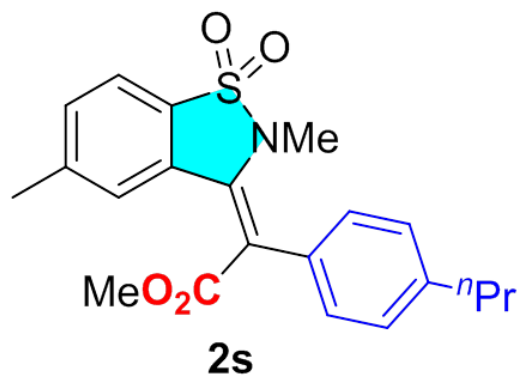

CDCl<sub>3</sub>, 101 MHz

169.68  
 143.95  
 143.30  
 137.00  
 131.92  
 131.74  
 131.40  
 130.42  
 130.37  
 129.84  
 129.57  
 129.50  
 128.72  
 127.08  
 124.49  
 121.09  
 120.83  
 113.57

77.32  
 77.00  
 76.68

52.87

37.71  
 31.75  
 24.23  
 22.14  
 13.76

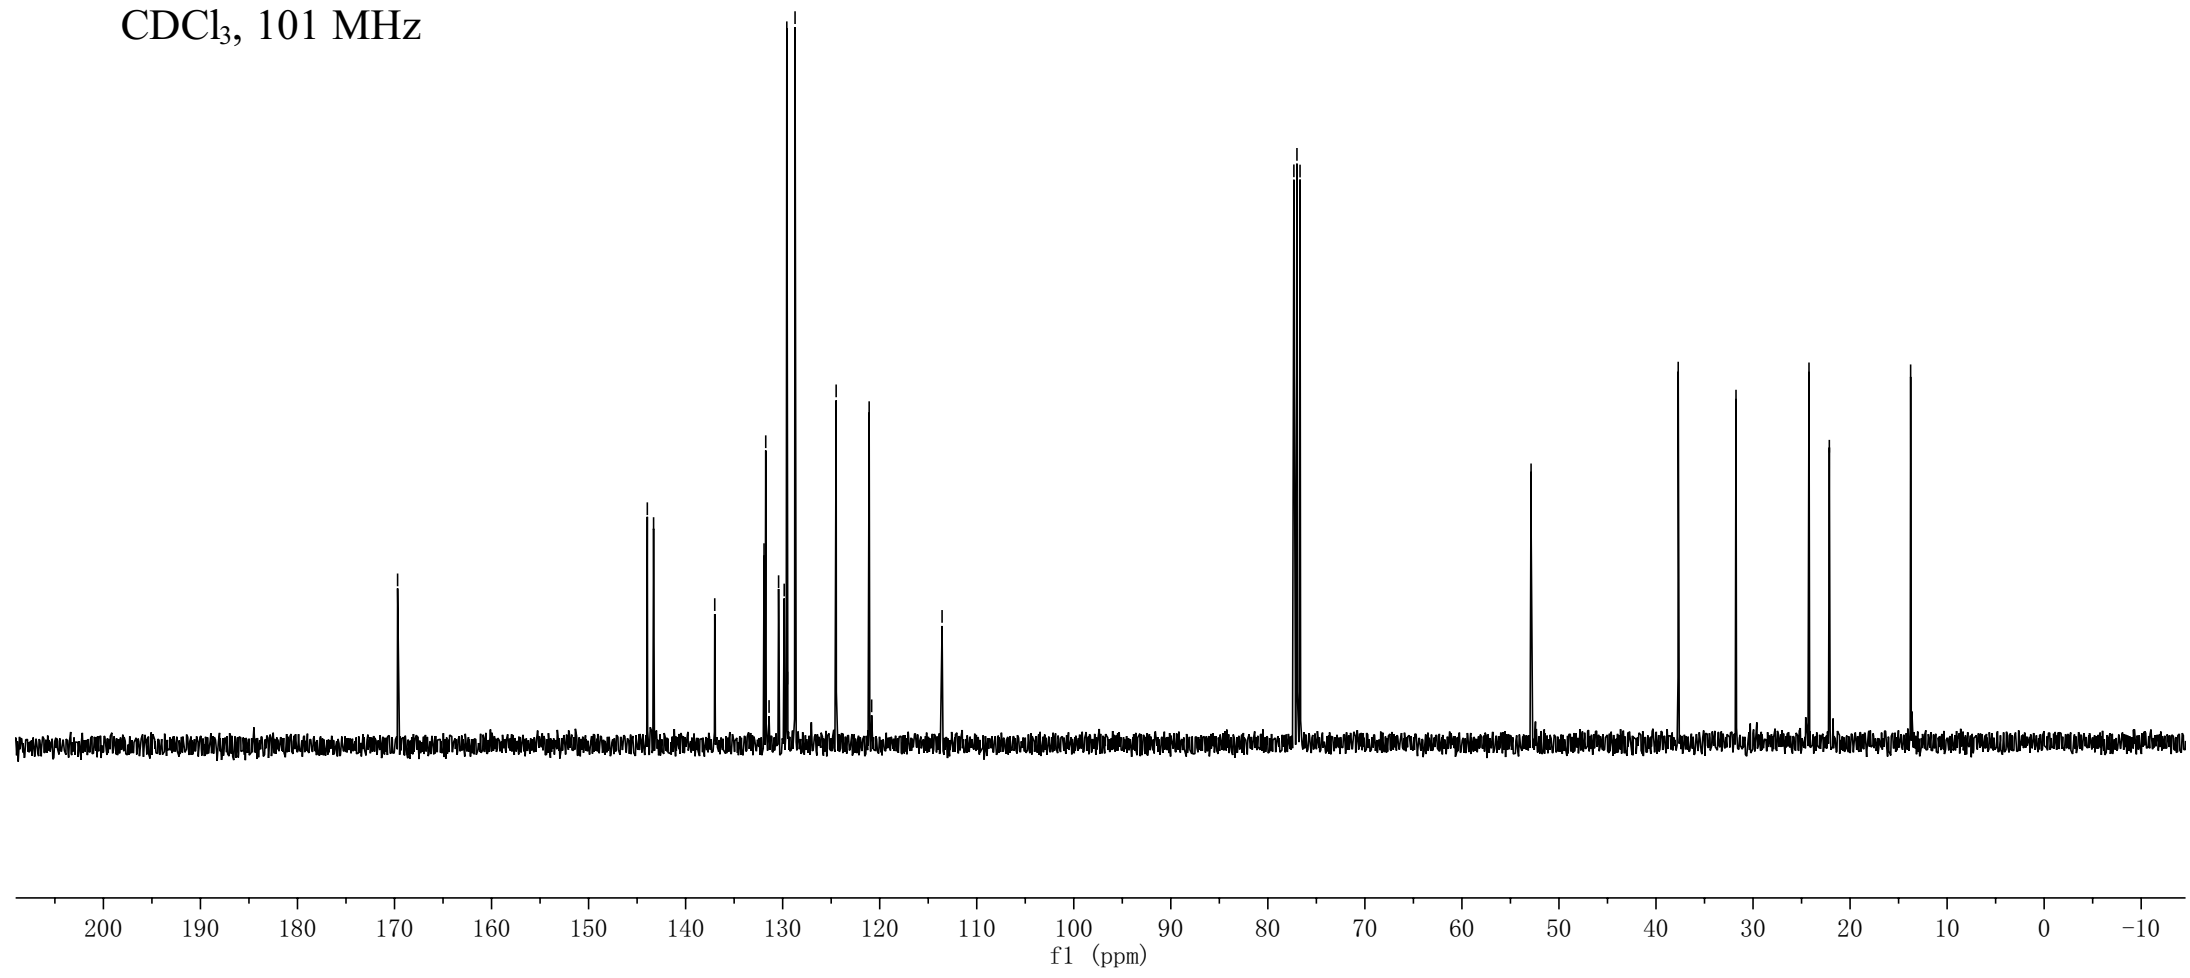

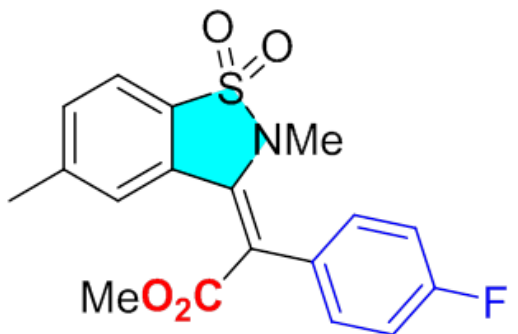

**2t**

CDCl<sub>3</sub>, 400 MHz

7.7708  
7.7517  
7.7149  
7.6949  
7.4558  
7.4365  
7.4345  
7.4328  
7.3628  
7.2953  
7.2601  
7.1781  
7.1566  
7.1353  
7.0770

3.8674  
3.7825  
-3.2386  
2.6719  
2.4767  
-2.1107

1.00  
0.10  
2.00  
2.20  
0.20  
2.00

3.00  
0.30  
0.29  
3.00  
3.00  
0.29

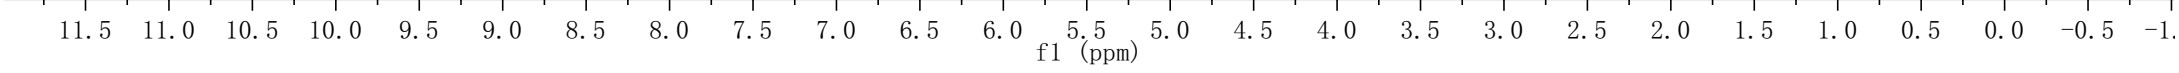

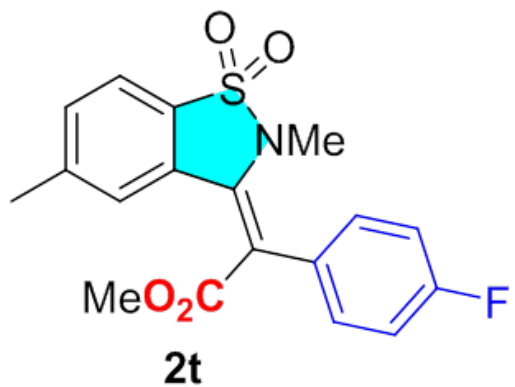

CDCl<sub>3</sub>, 101 MHz

169.4779  
163.7187  
161.2372  
144.1605  
138.0170  
132.0882  
131.7279  
131.6454  
130.8708  
130.8350  
130.2096  
129.8948  
124.7410  
121.2235  
115.9975  
115.7817  
112.1755

77.3180  
77.0007  
76.6836

53.0044

31.9541

22.2146

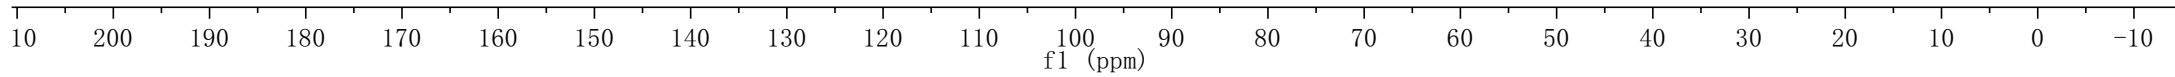

7.7710  
7.7512  
7.4669  
7.4601  
7.4579  
7.4549  
7.4404  
7.4383  
7.4356  
7.4037  
7.3973  
7.3922  
7.3811  
7.3759  
7.3698  
7.3062  
7.3005  
7.2953  
7.2839  
7.2792  
7.2699  
6.0053

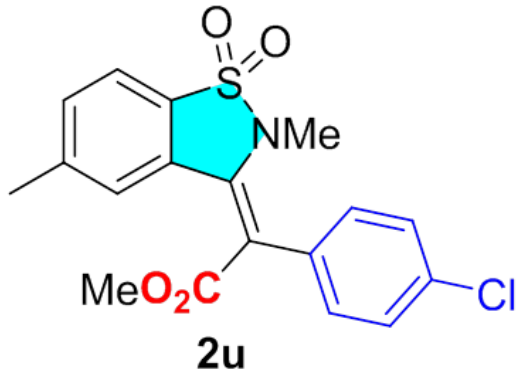

CDCl<sub>3</sub>, 400 MHz

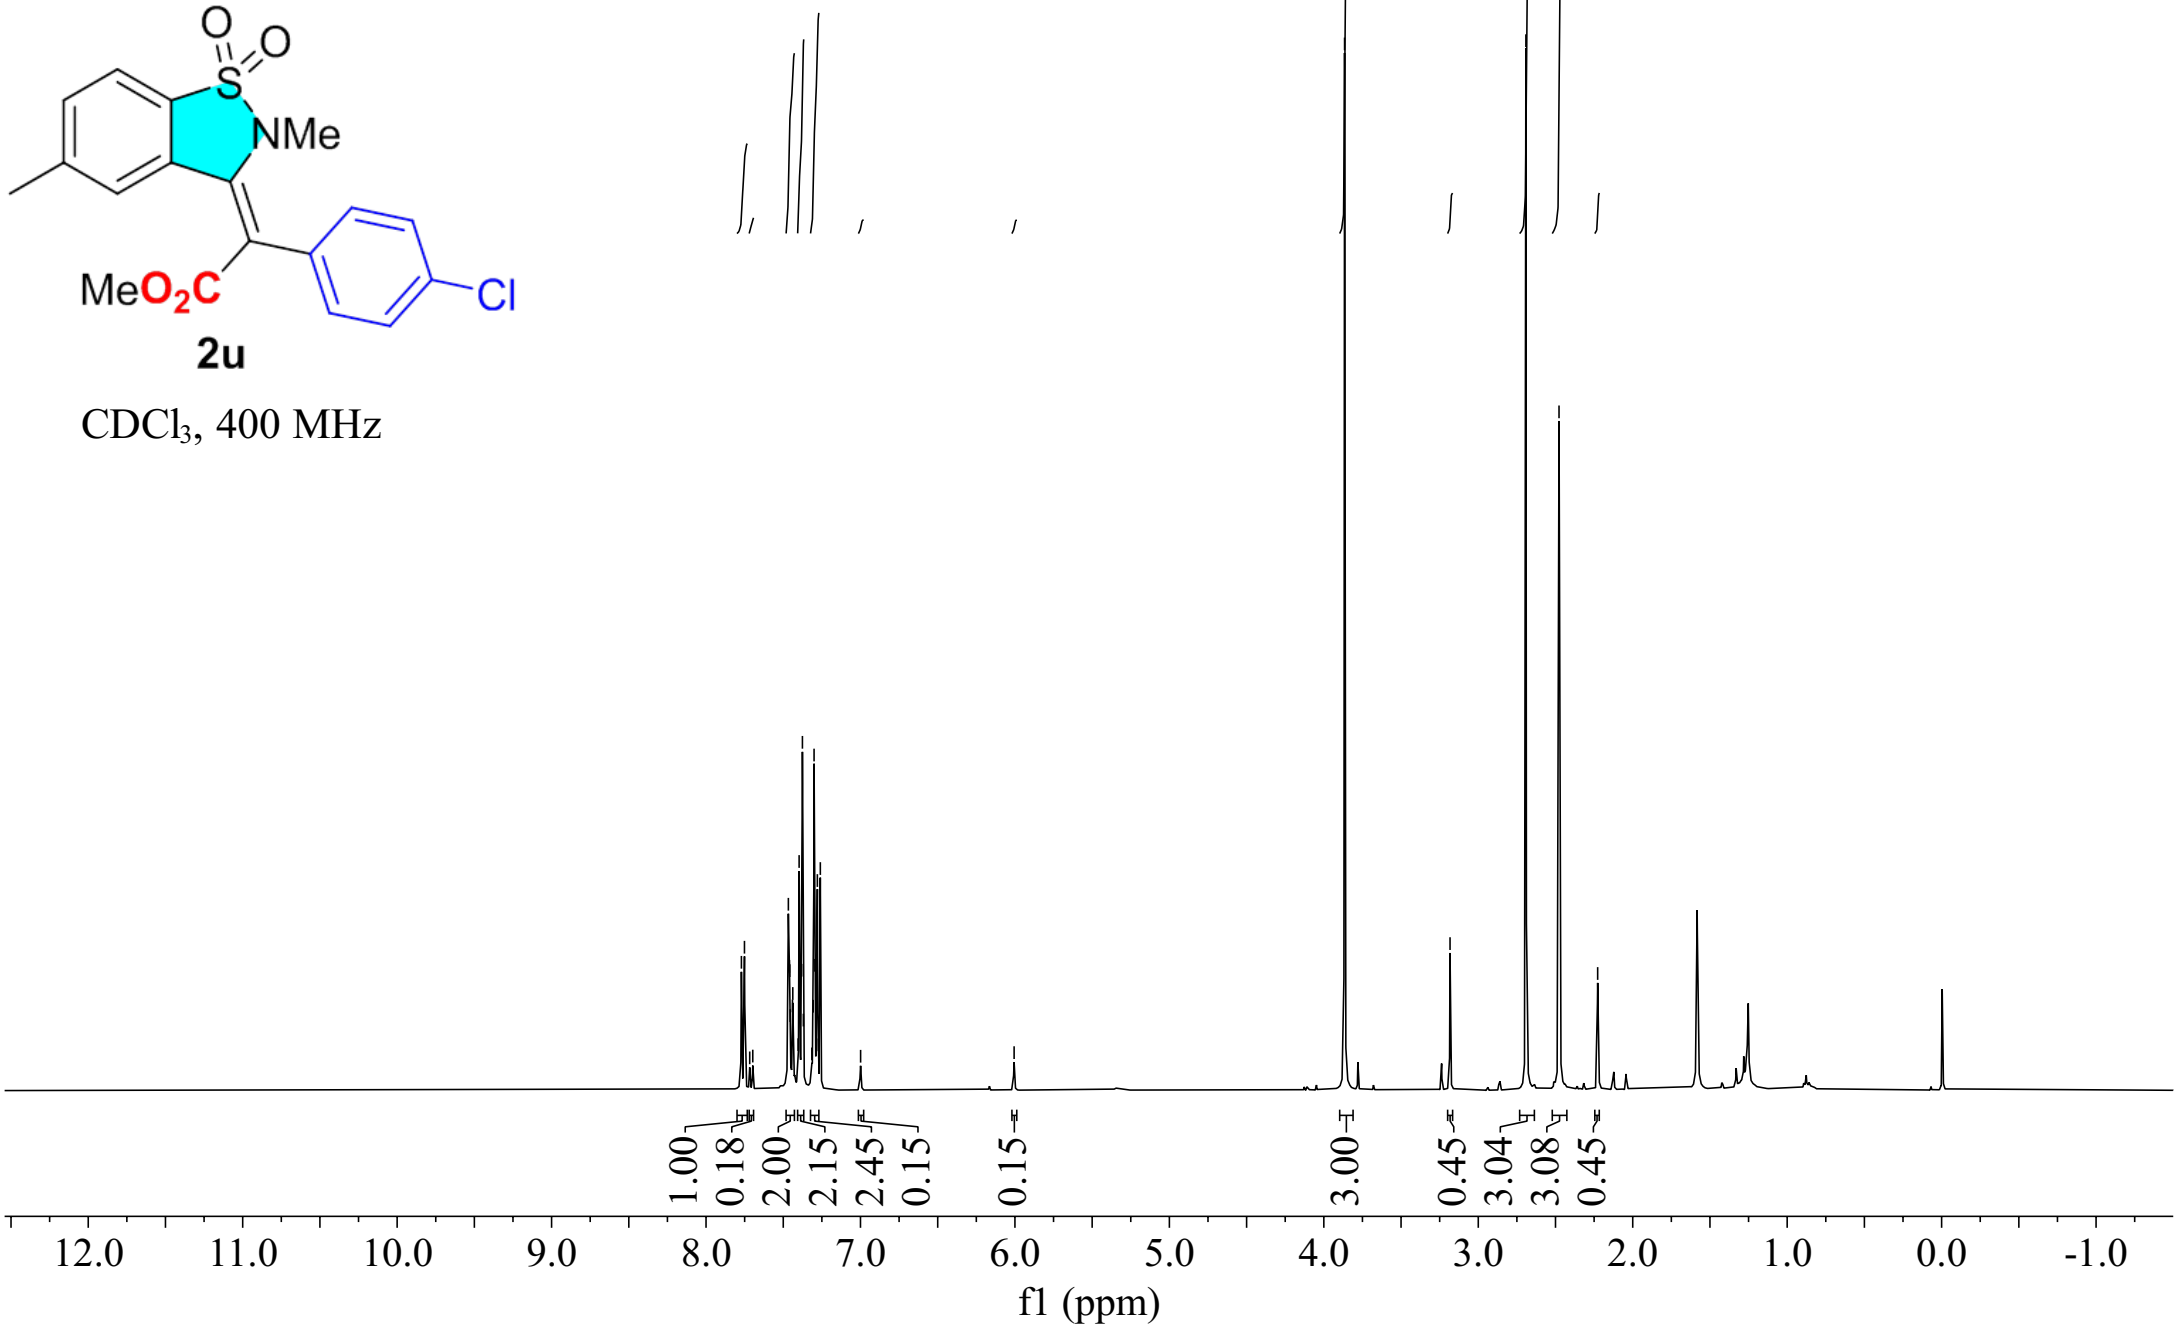

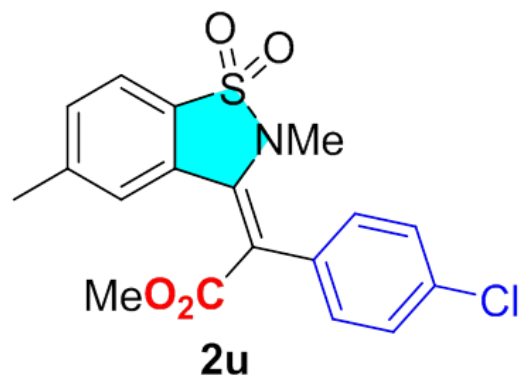

CDCl<sub>3</sub>, 101 MHz

169.32  
144.19  
143.40  
138.39  
134.54  
133.92  
133.63  
133.45  
132.18  
131.18  
131.10  
130.93  
130.18  
129.96  
129.04  
128.99  
124.91  
124.85  
121.25  
121.05  
111.94  
104.82  
77.32  
77.00  
76.68  
-53.01  
32.09  
29.67  
26.27  
22.21  
21.96

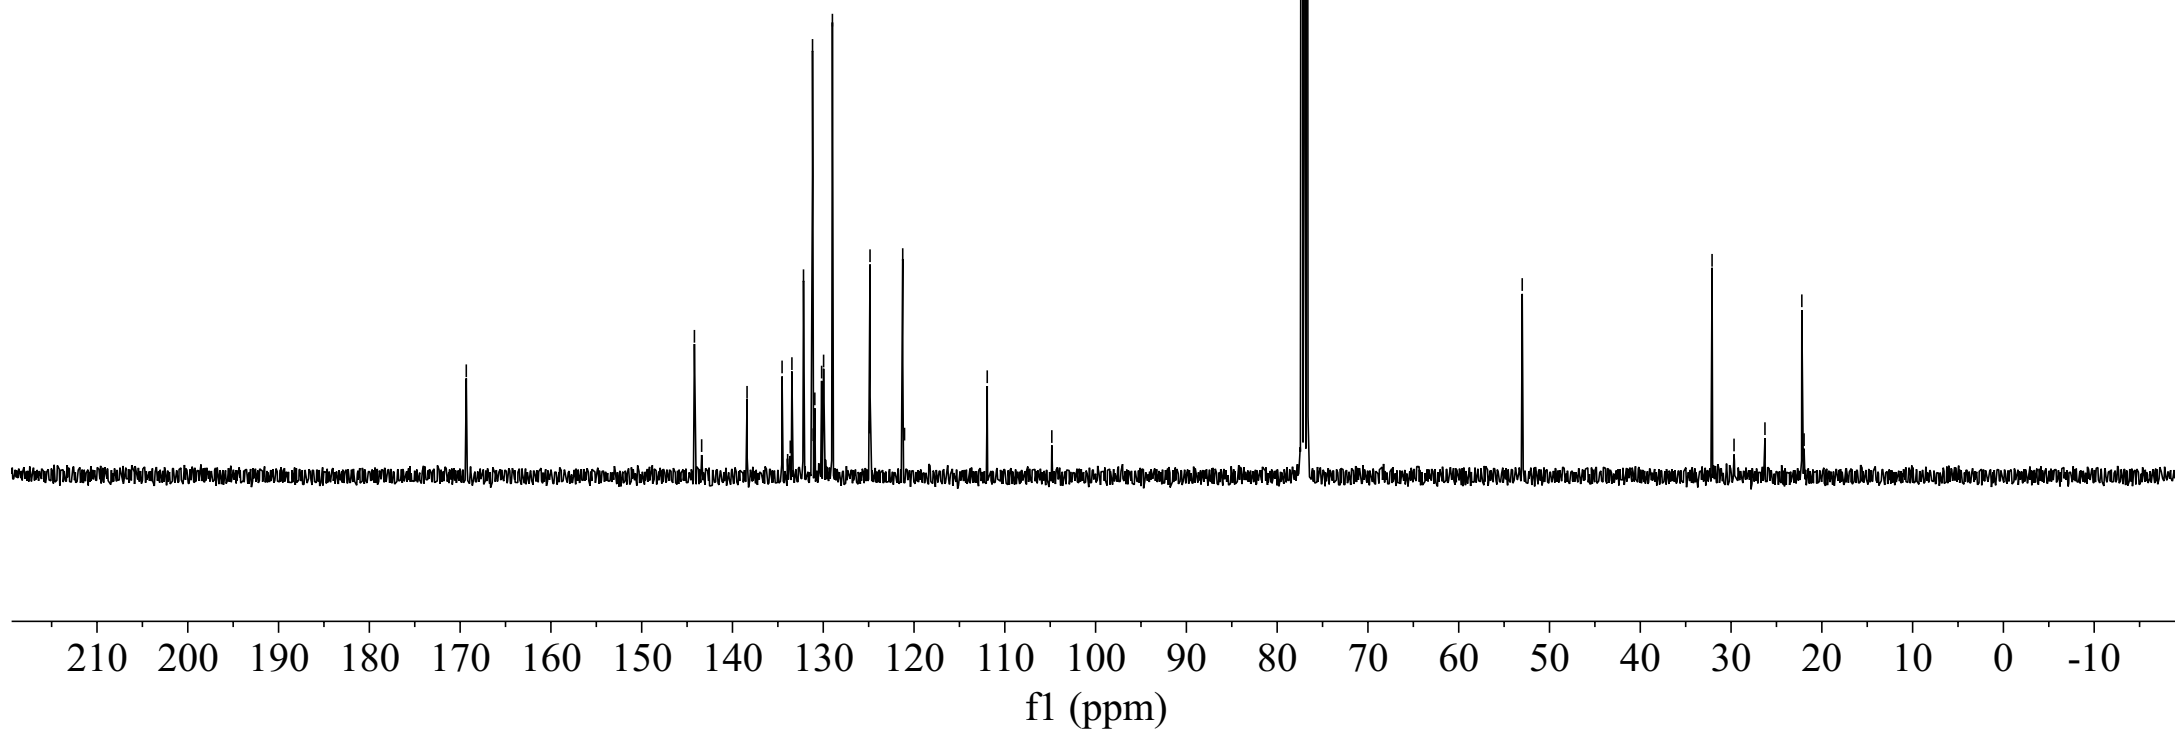

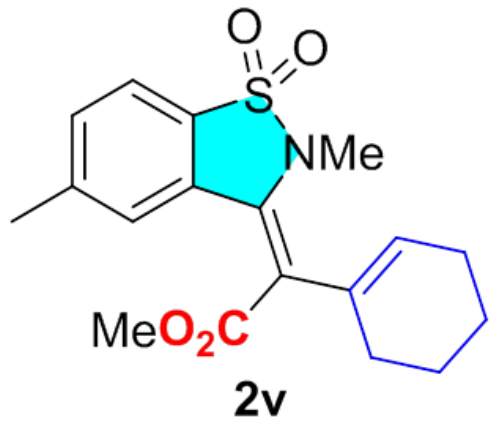

CDCl<sub>3</sub>, 400 MHz

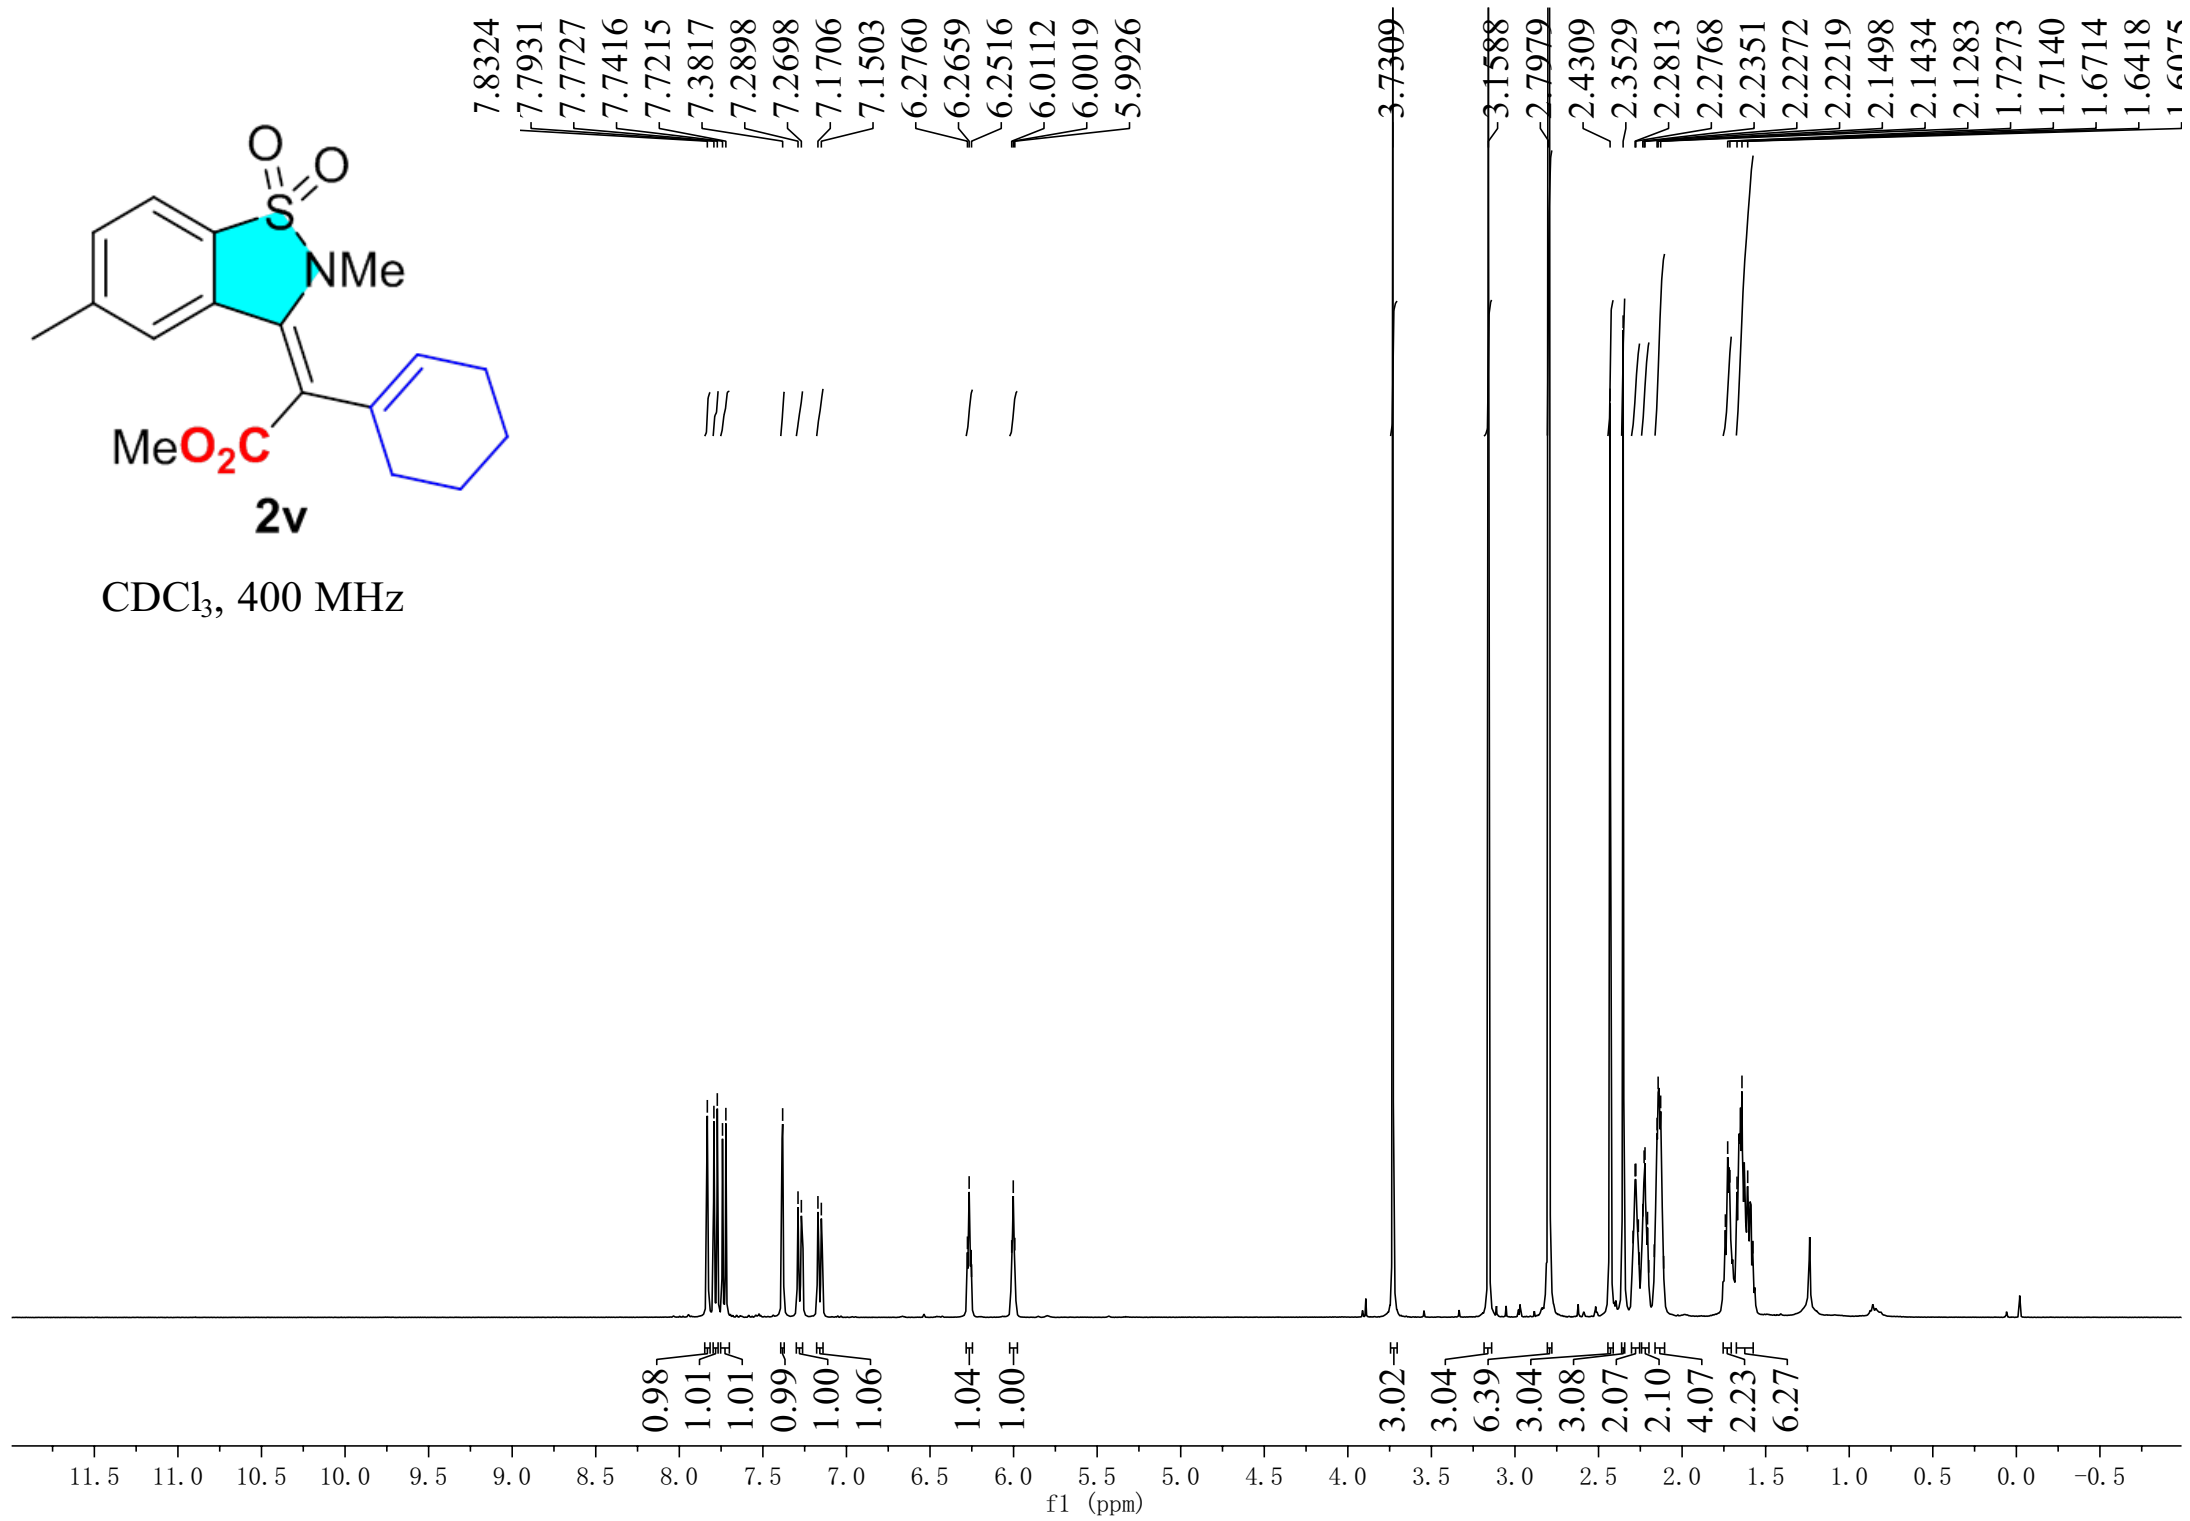



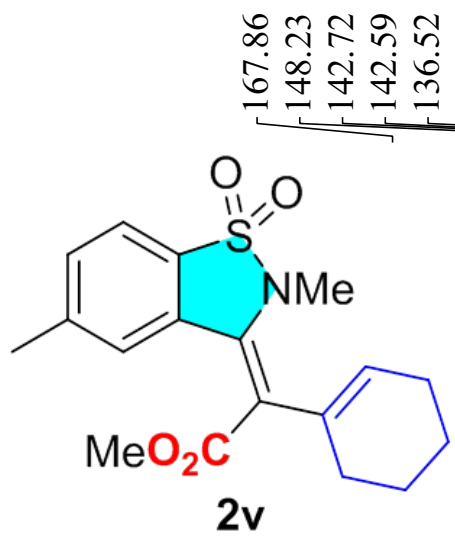

CDCl<sub>3</sub>, 101 MHz

167.86  
148.23  
142.72  
142.59  
136.52  
135.30  
134.48  
134.32  
133.07  
130.31  
130.07  
128.46  
128.20  
127.78  
125.58  
122.47  
121.56  
120.61  
113.22  
-97.80

84.64  
77.32  
77.00  
76.68

-51.98  
37.74  
32.86  
28.60  
27.09  
25.74  
25.50  
22.26  
22.11  
21.87  
21.64  
21.34  
20.98

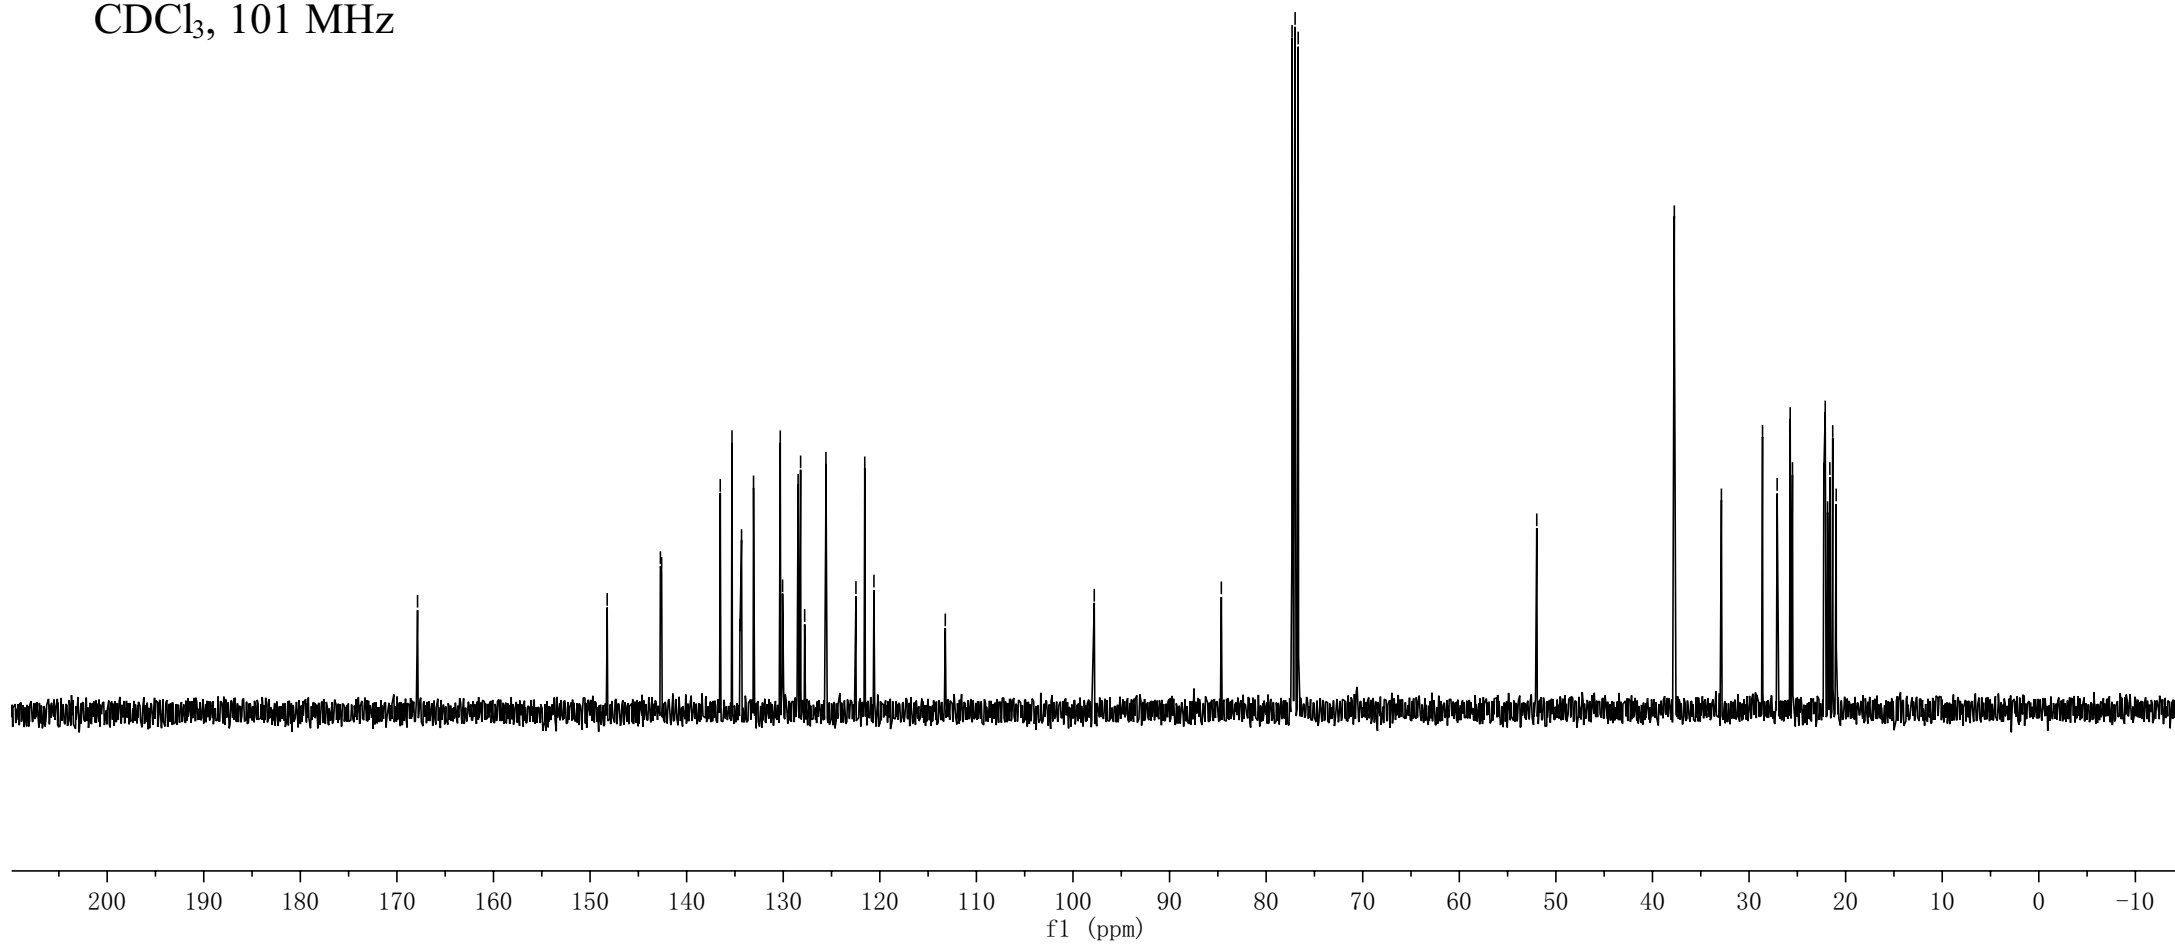

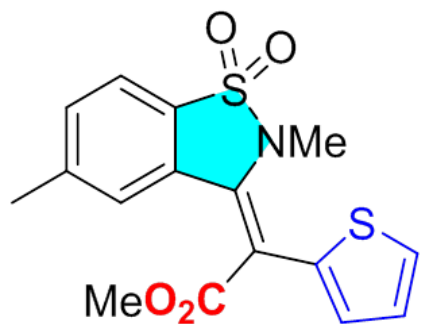

**2w**

CDCl<sub>3</sub>, 400 MHz

7.7050  
7.6852  
7.5126  
7.5097  
7.4996  
7.4967  
7.3357  
7.3159  
7.2601  
7.1240  
7.1152  
7.1110  
7.1022  
7.0153  
7.0125  
7.0066  
7.0037  
-6.1907

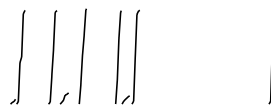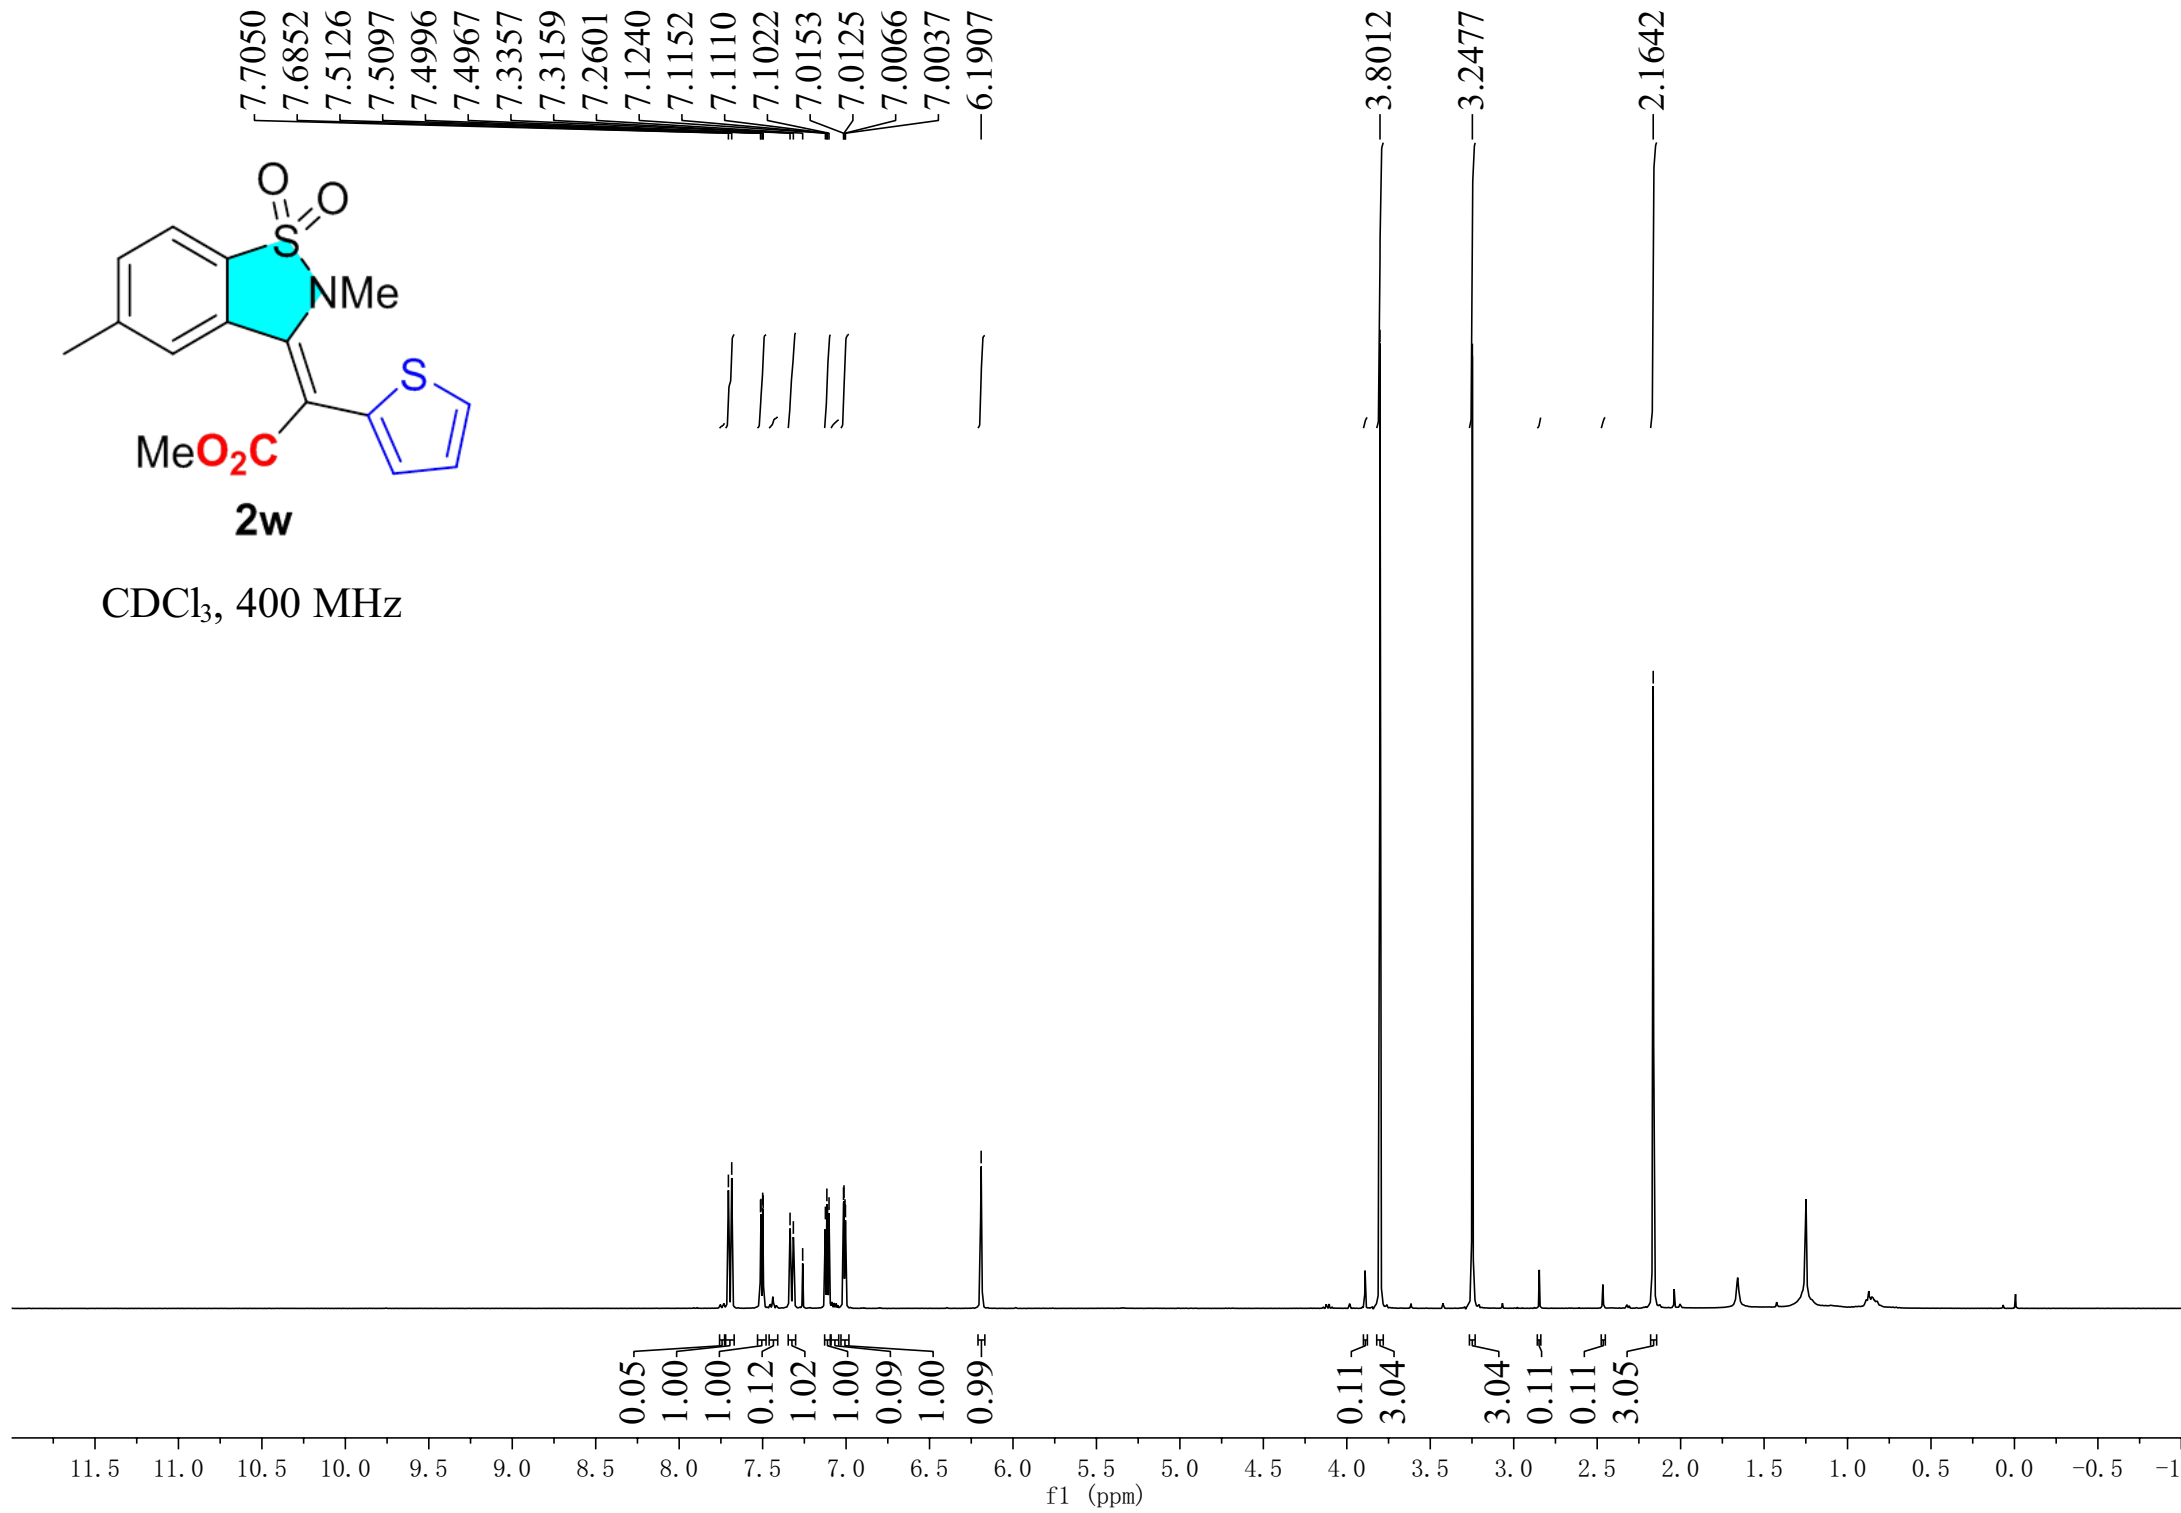

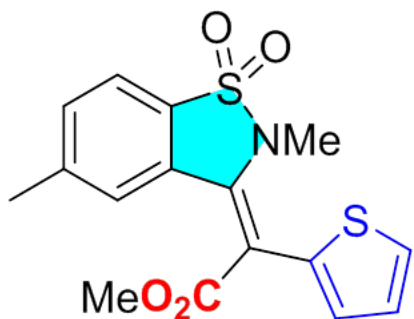

**2w**

CDCl<sub>3</sub>, 101 MHz

-166.82

143.88

141.04

137.36

131.92

130.26

129.81

129.66

128.47

127.85

127.17

120.91

-102.38

77.32

77.00

76.68

-52.61

-30.63

-21.98

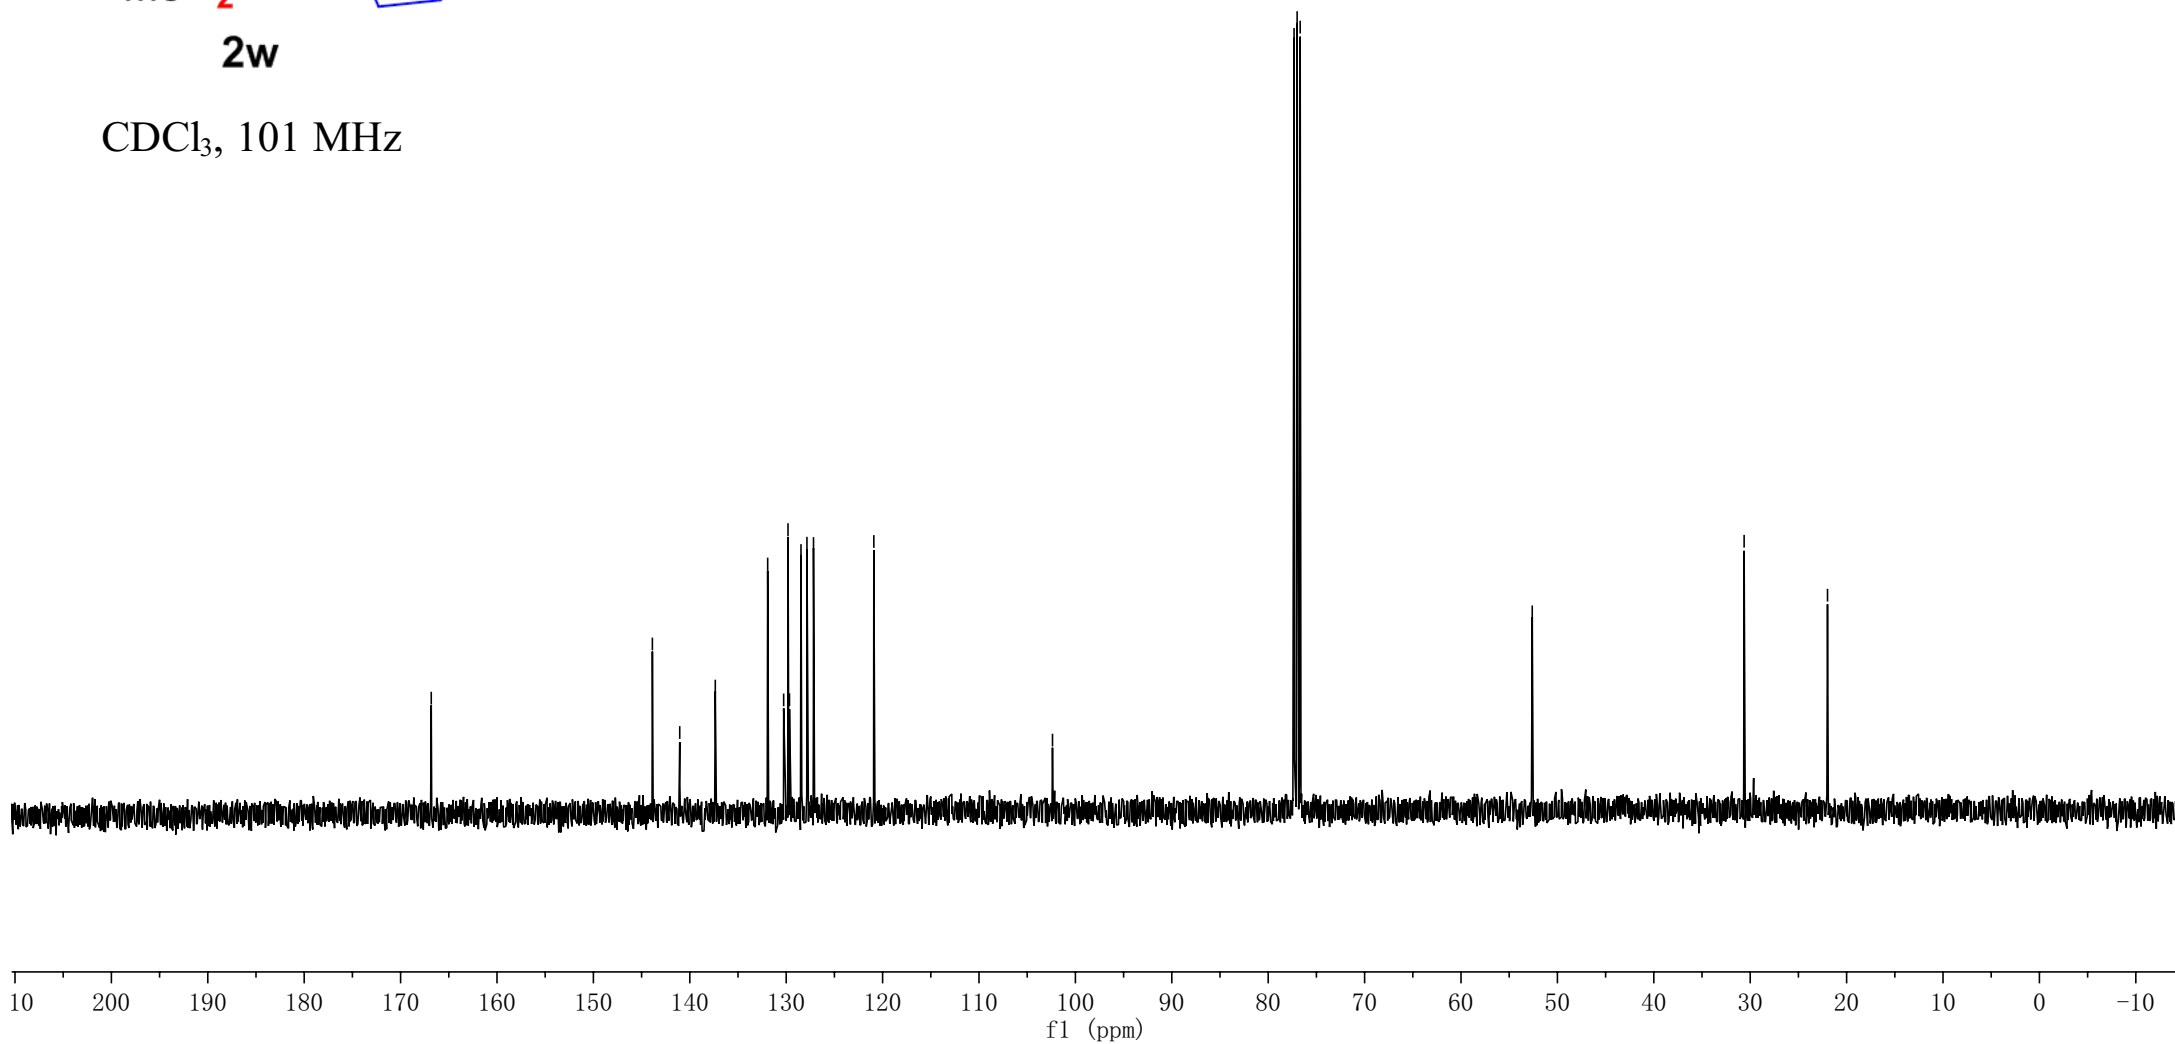

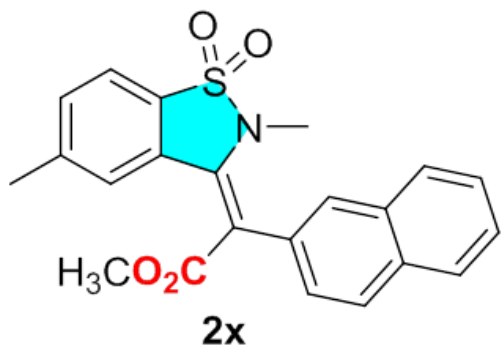

CDCl<sub>3</sub>, 400 MHz

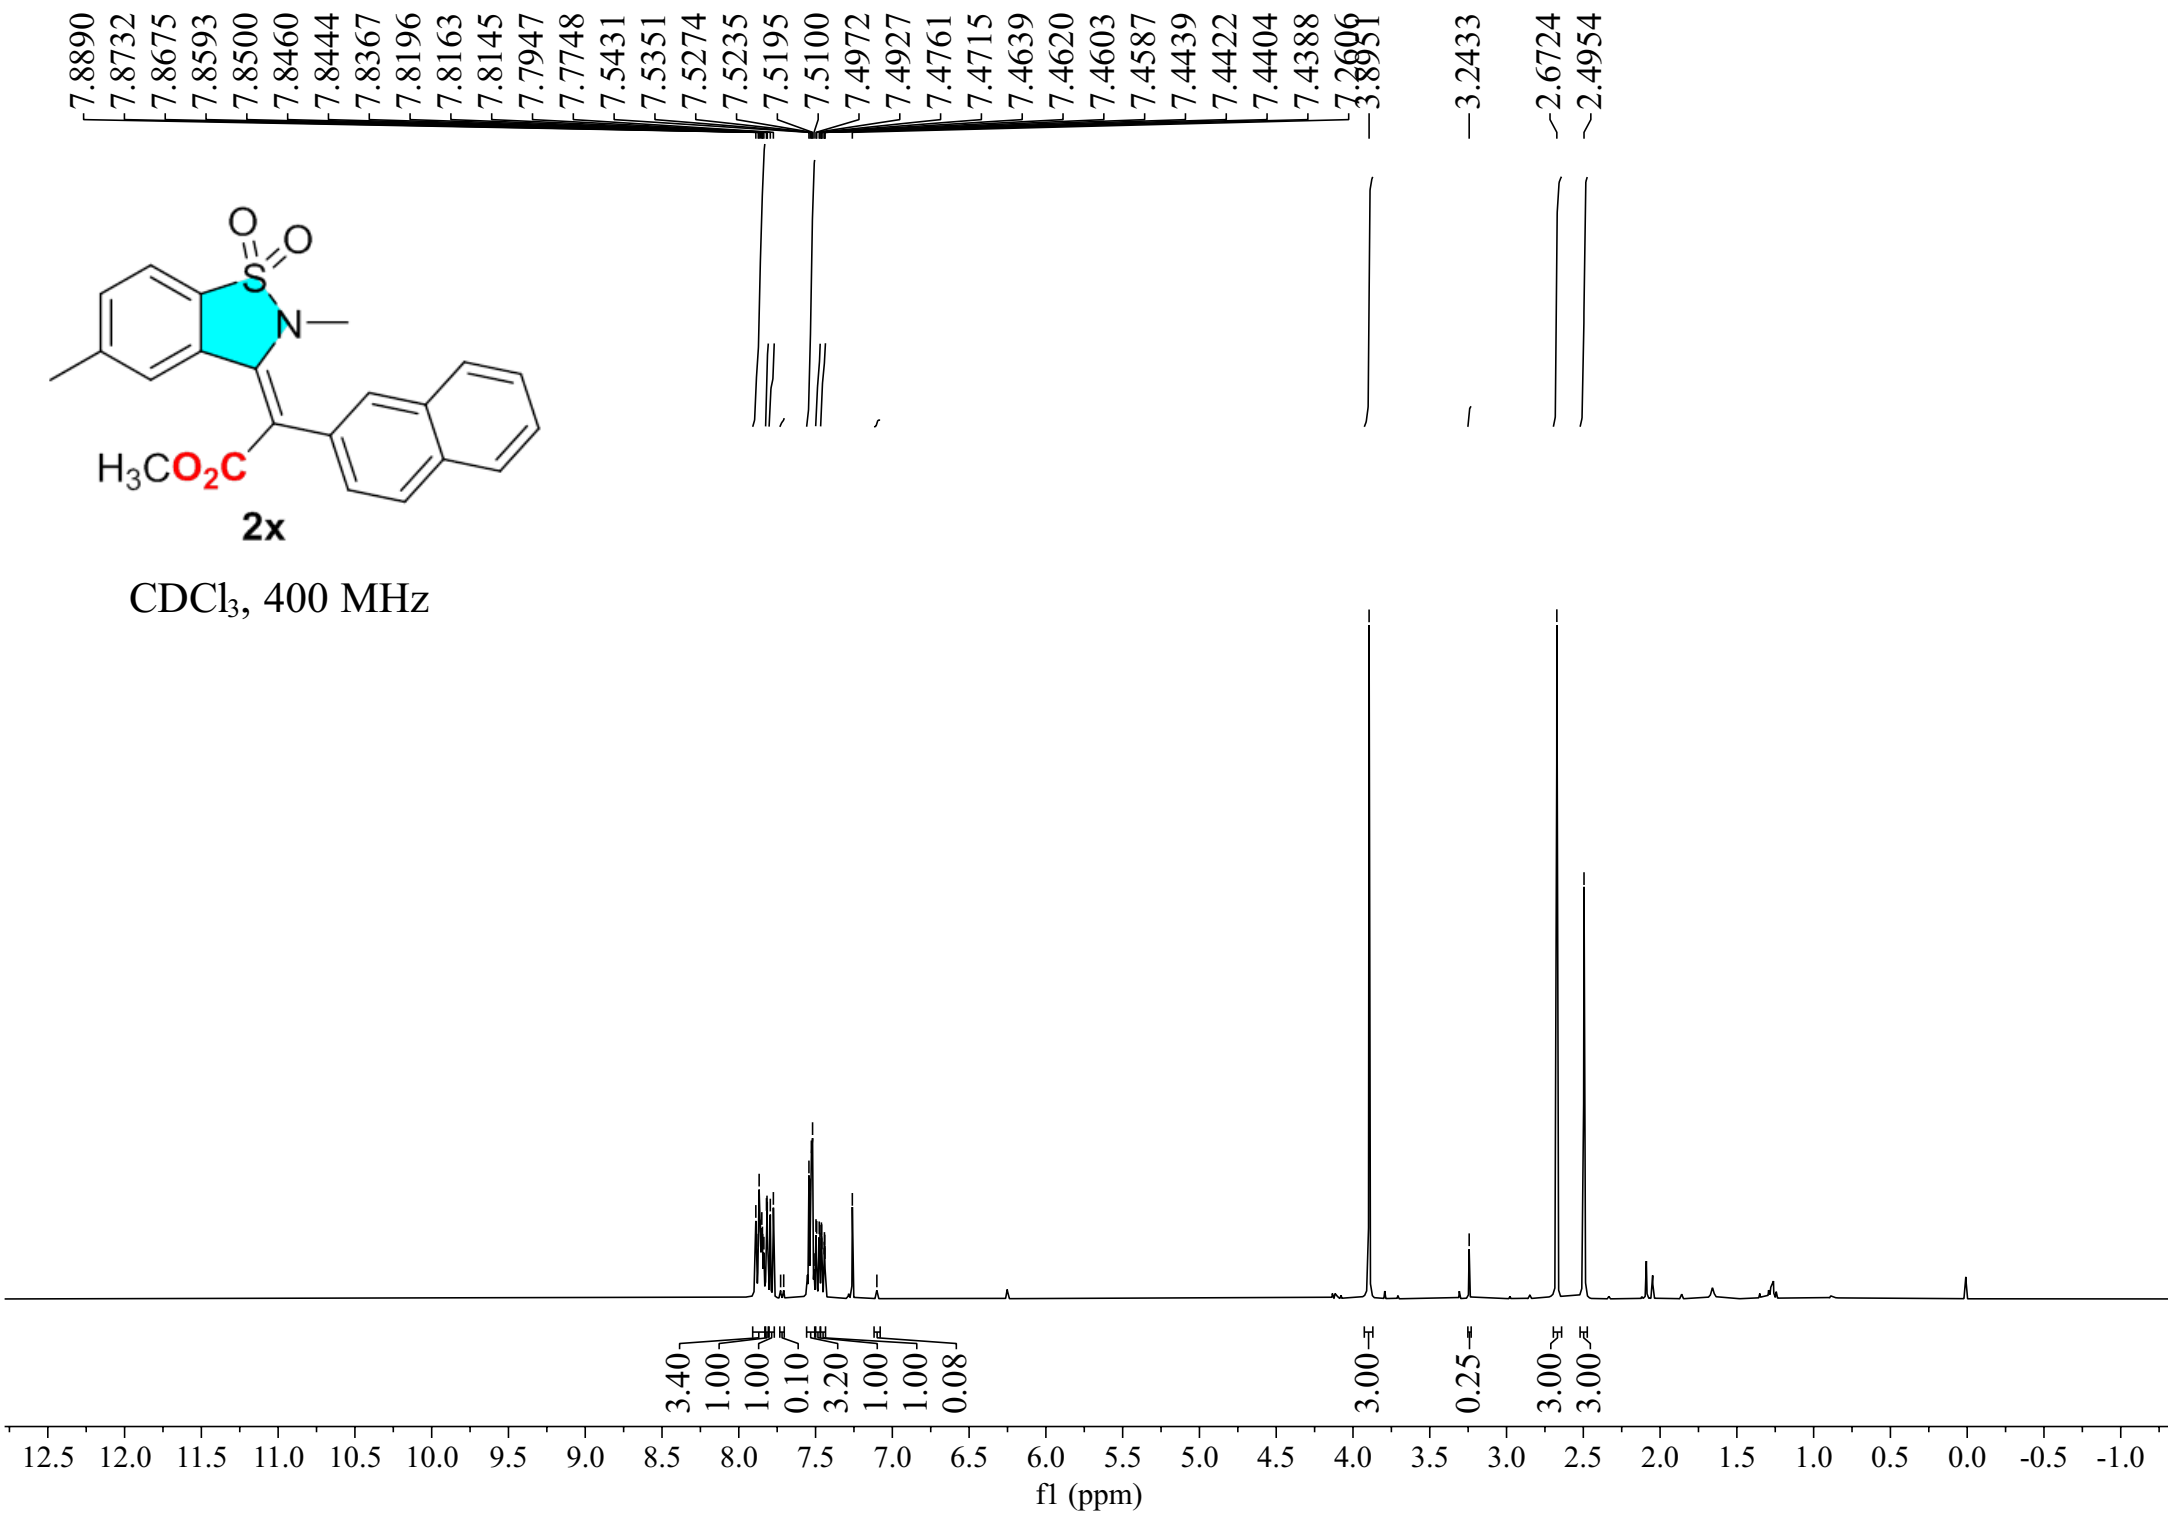

169.60  
144.08  
143.25  
137.79  
132.92  
132.81  
132.22  
131.97  
130.91  
130.32  
129.97  
129.86  
129.11  
128.43  
128.29  
128.15  
127.74  
127.70  
127.47  
127.02  
126.91  
126.75  
126.45  
126.23  
125.00  
124.70  
121.18  
120.87  
113.21  
77.32  
77.00  
76.68

52.97

32.01  
26.30  
22.18  
21.79

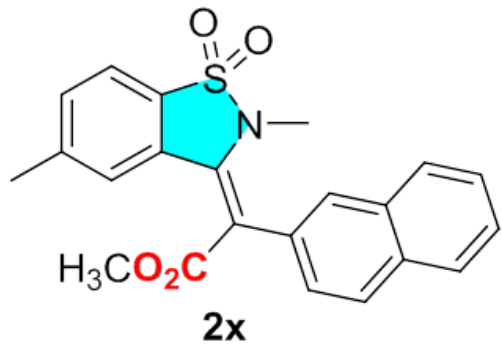

CDCl<sub>3</sub>, 101 MHz

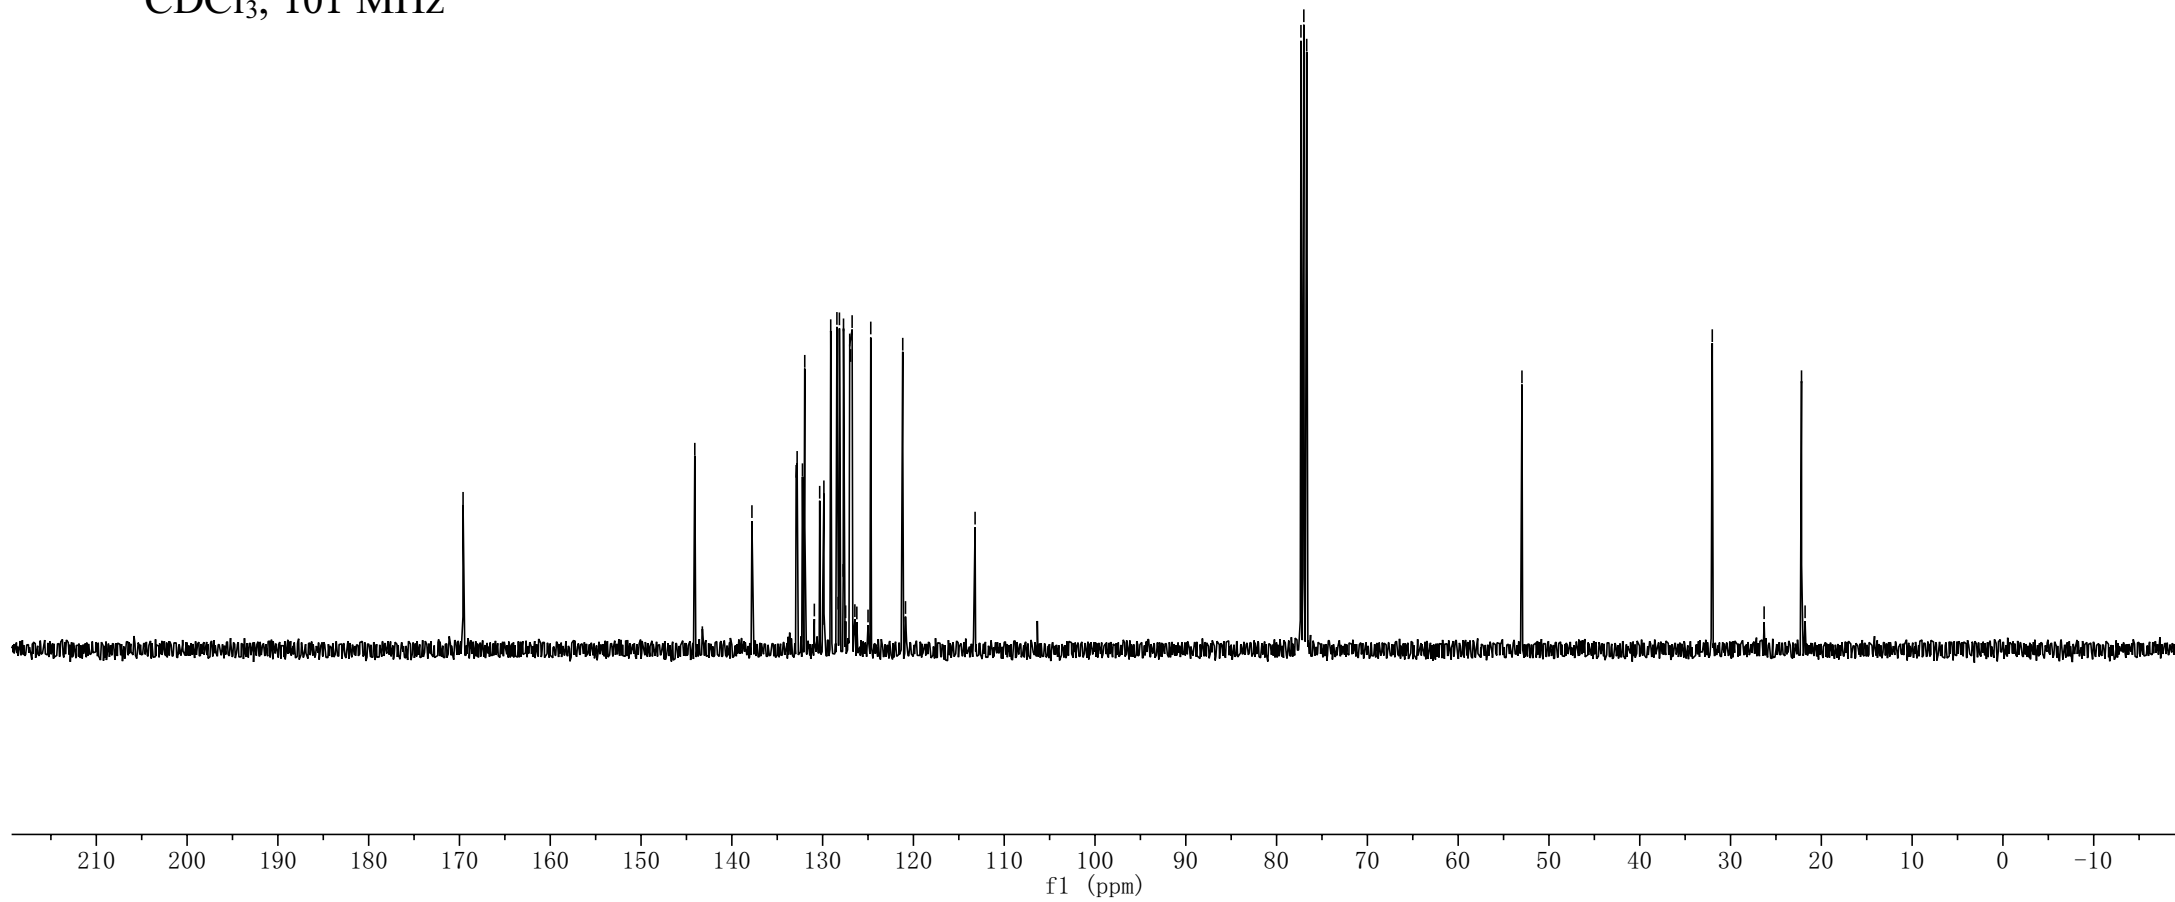

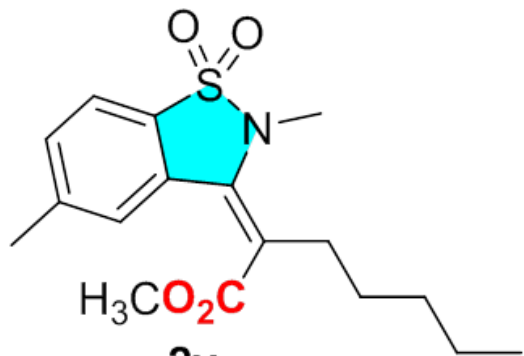

2y

CDCl<sub>3</sub>, 400 MHz

7.7489  
7.7280  
7.2912  
7.2742  
7.2683

3.9013

3.2816

2.6040

2.5850

2.5650

2.4279

1.6977

1.6794

1.6599

1.6428

1.4001

1.3704

1.3618

1.3270

0.9345

0.9174

0.0000

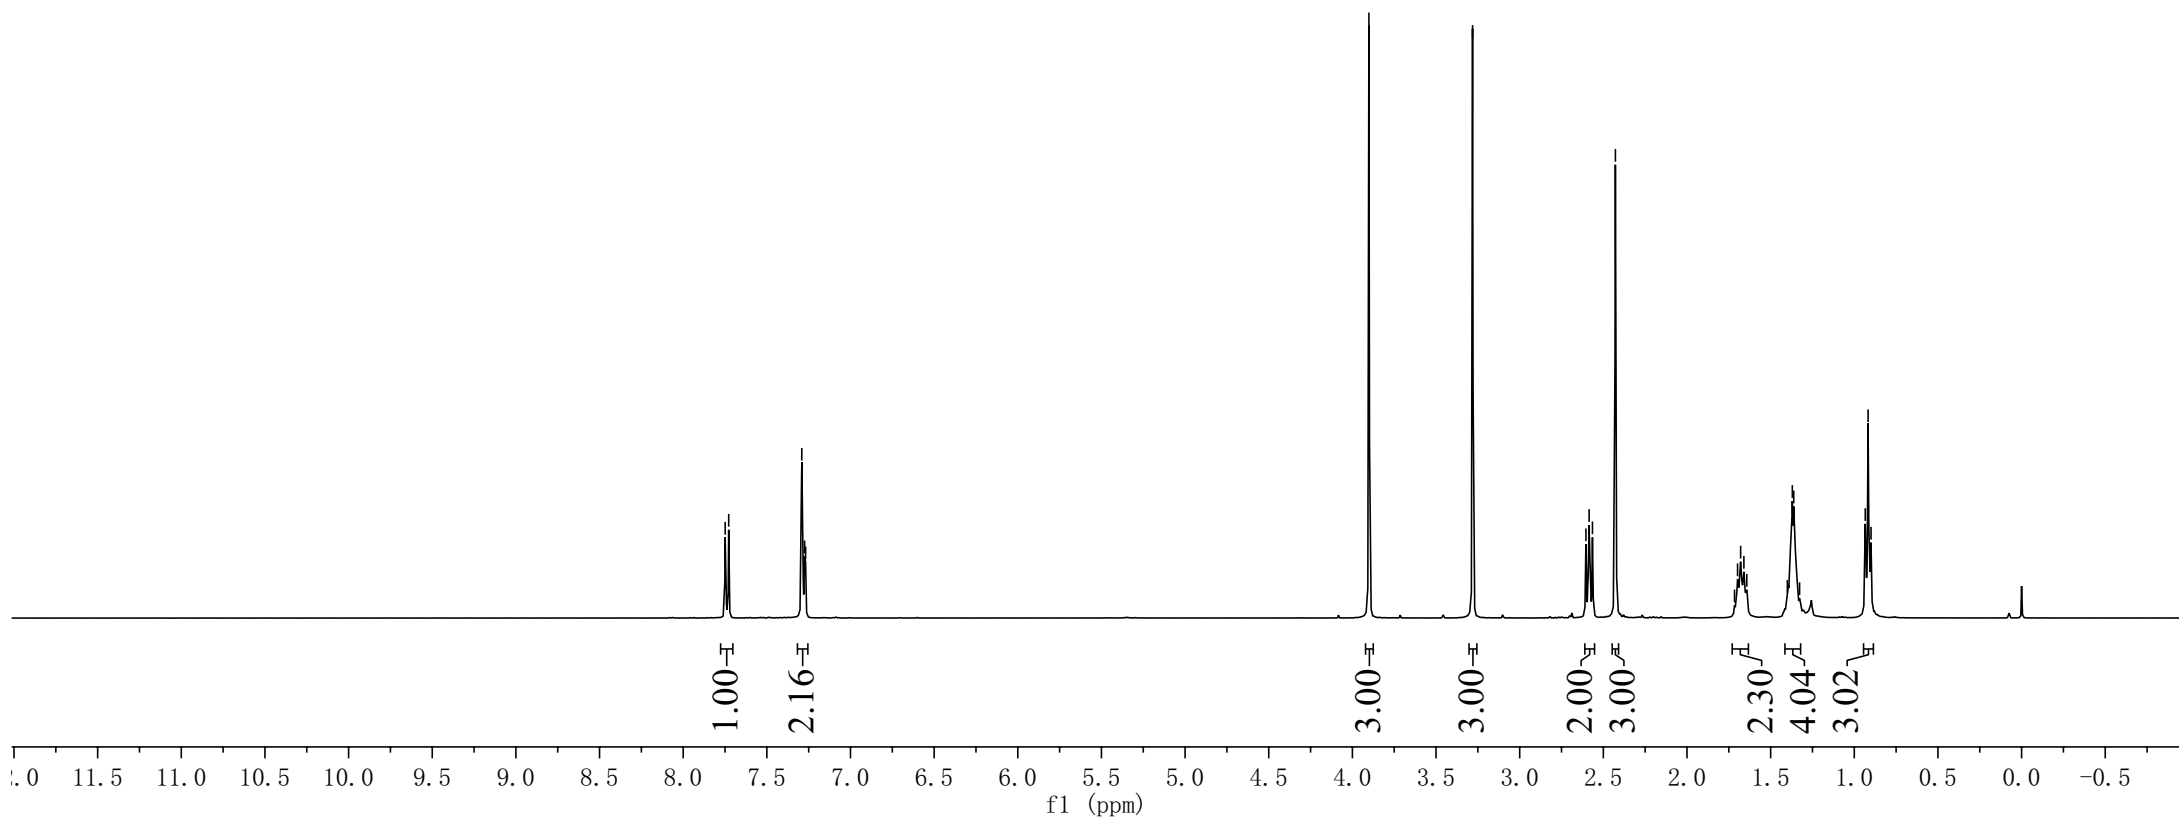

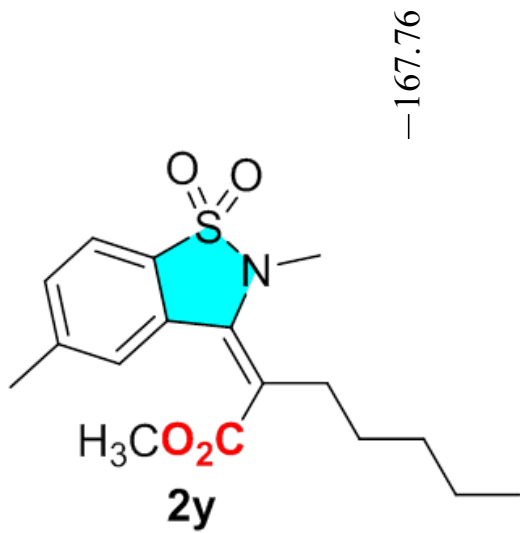

CDCl<sub>3</sub>, 101 MHz

-167.76

-146.05

-142.55

130.45

128.60

128.27

125.67

121.60

115.19

77.32

77.00

76.68

-52.34

31.59

31.40

31.32

27.59

22.25

21.87

13.91

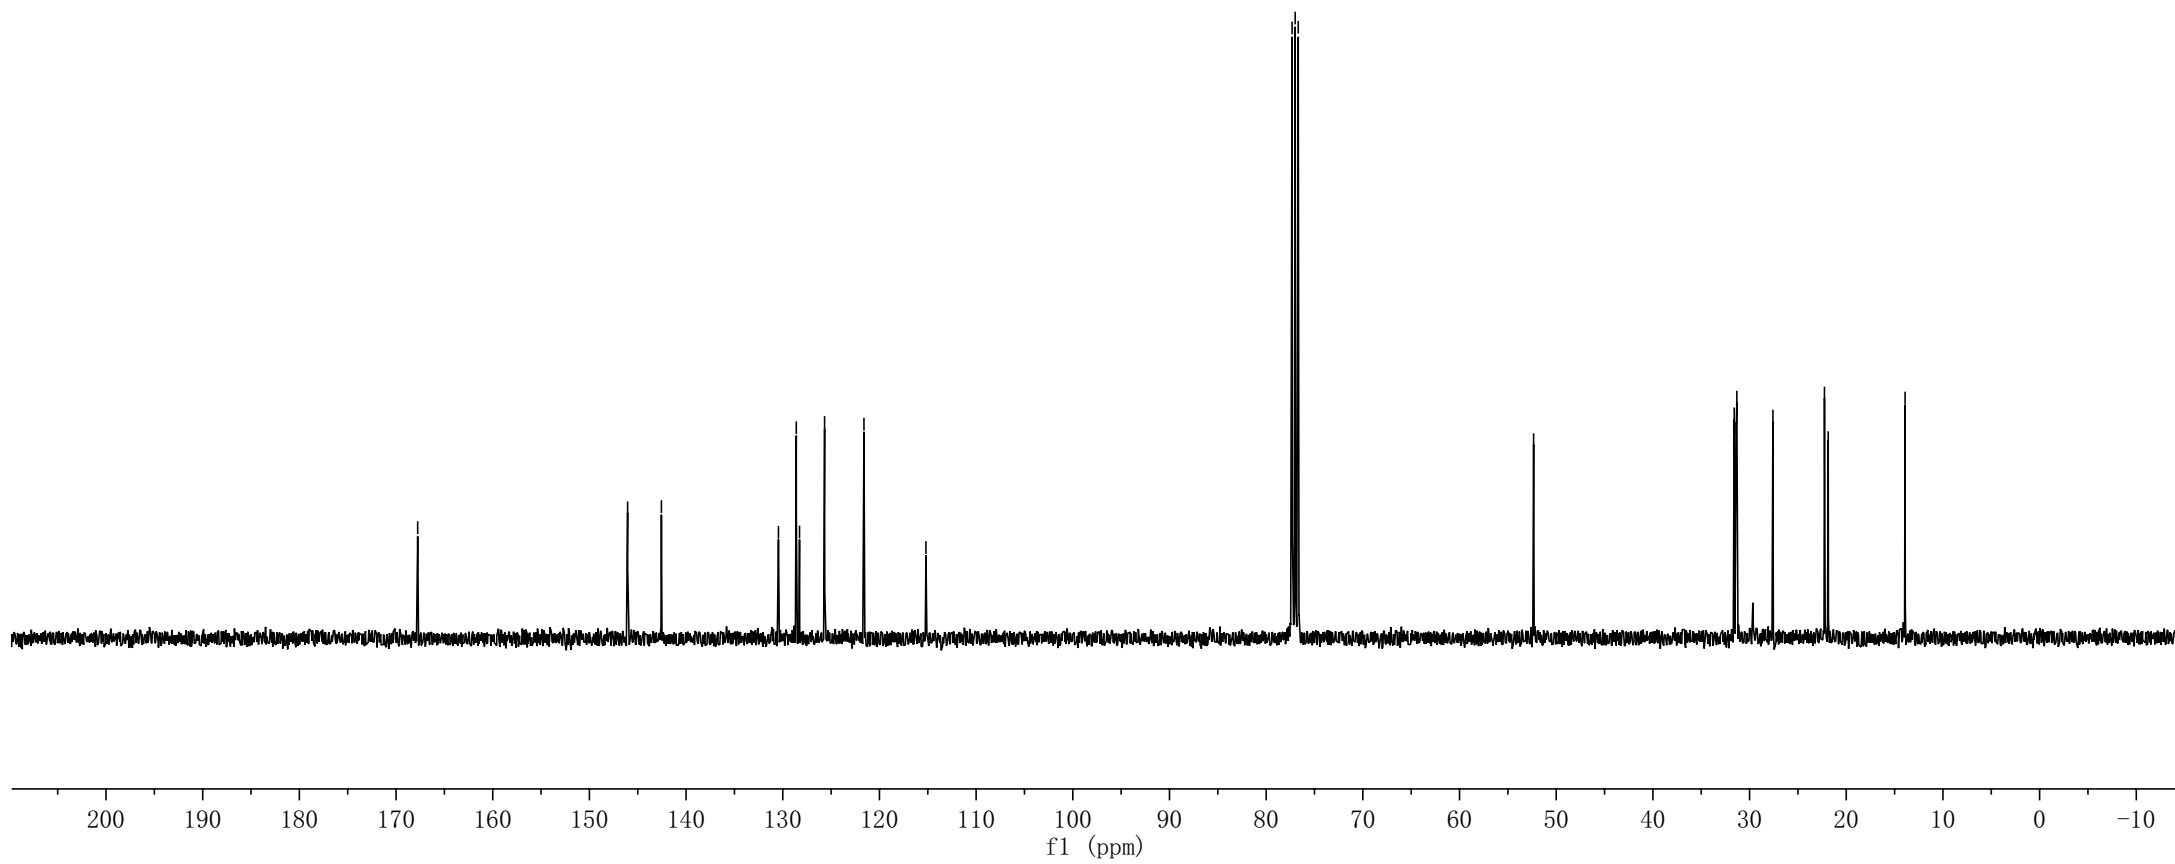

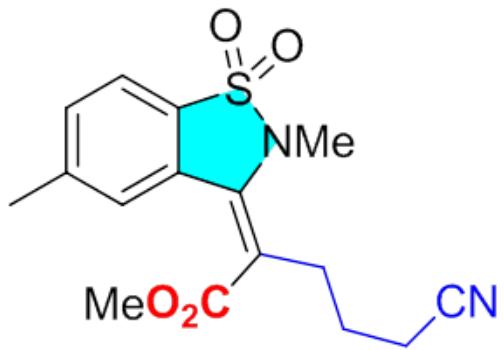

**2z**

CDCl<sub>3</sub>, 400 MHz

7.7546  
7.7346  
7.3528  
7.3492  
7.3327  
7.3291  
7.2915  
7.2603

3.9580  
3.1978  
2.8001  
2.7827  
2.7653  
2.5172  
2.5004  
2.4836  
2.4426  
2.0569  
2.0396  
2.0228

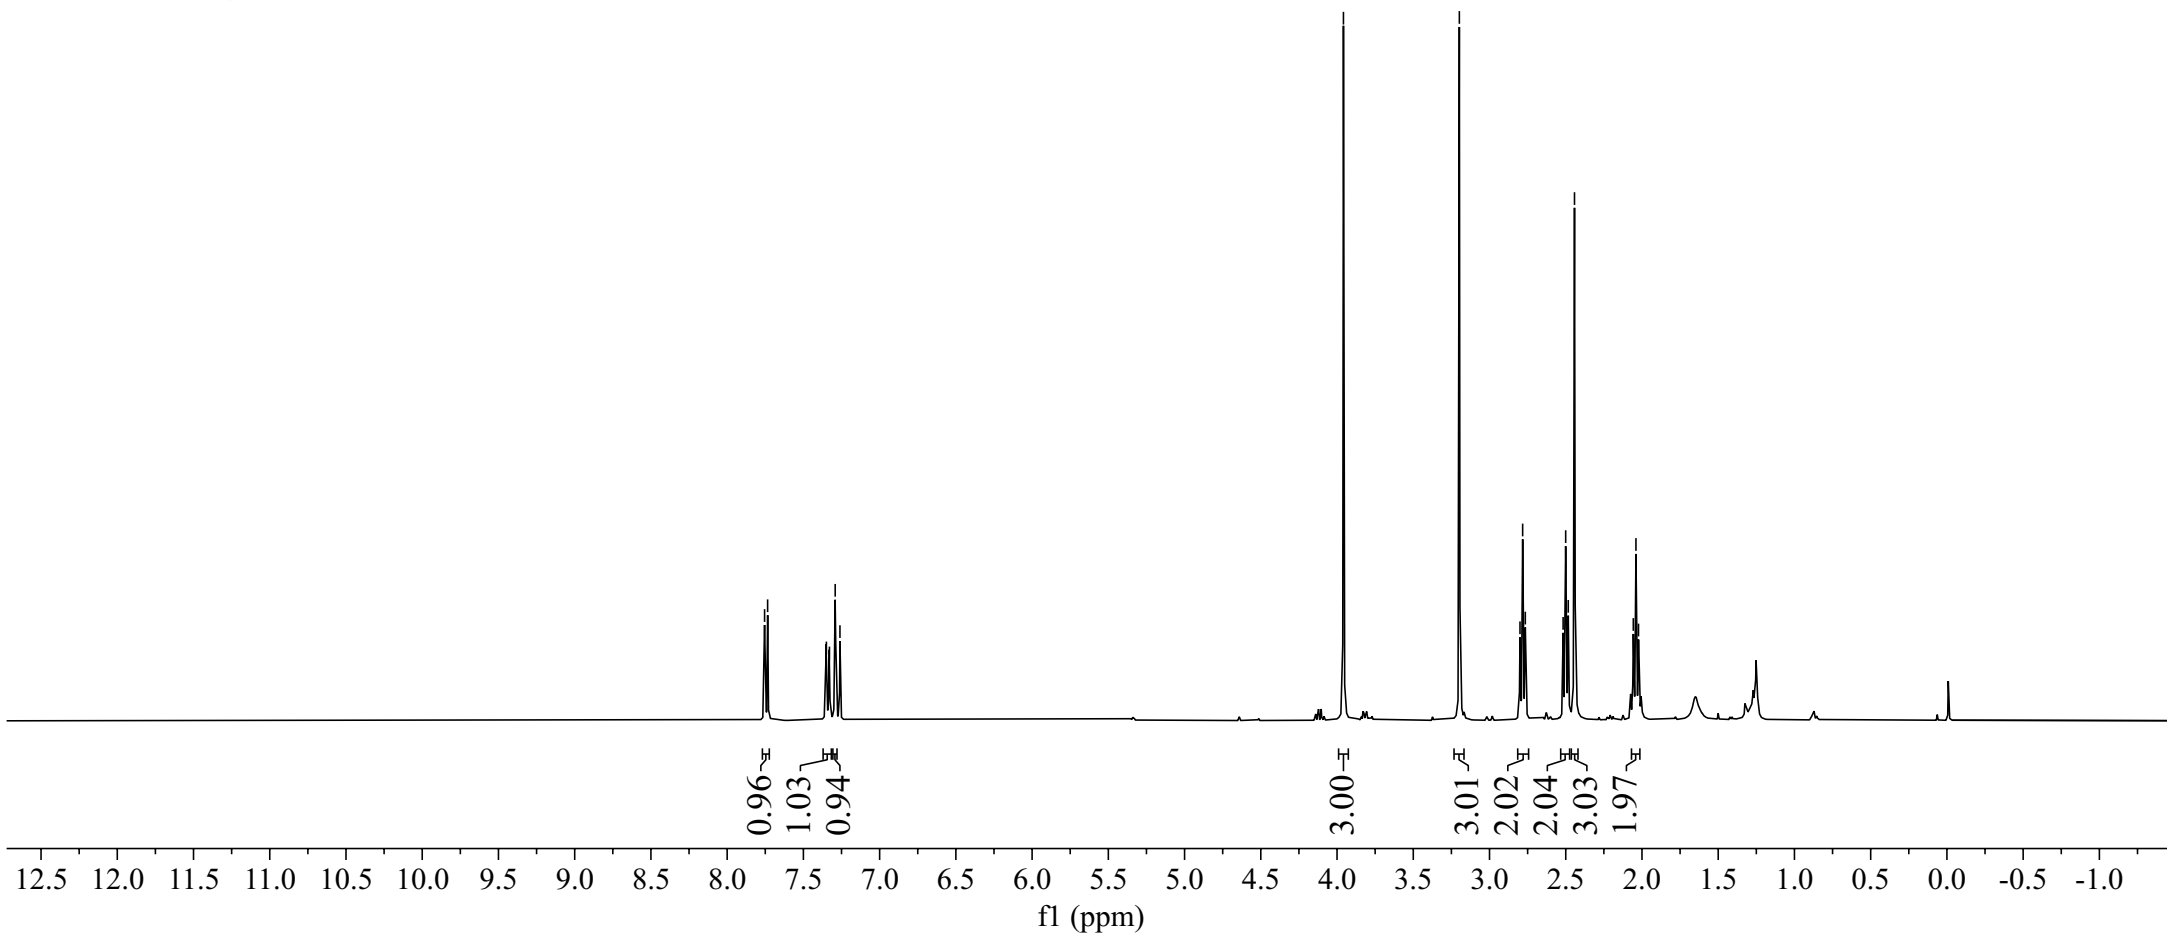



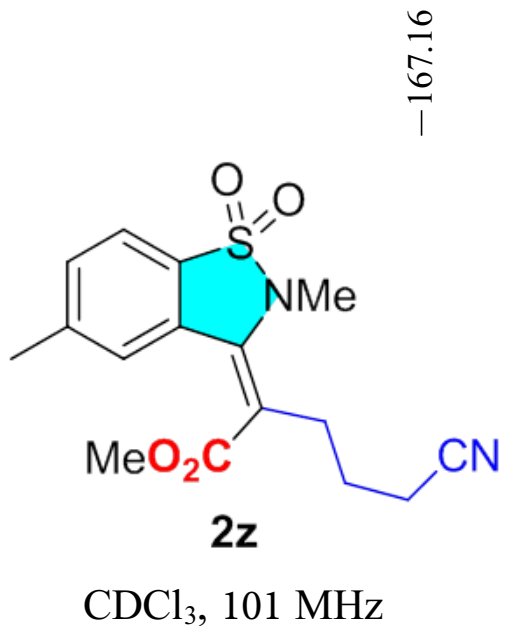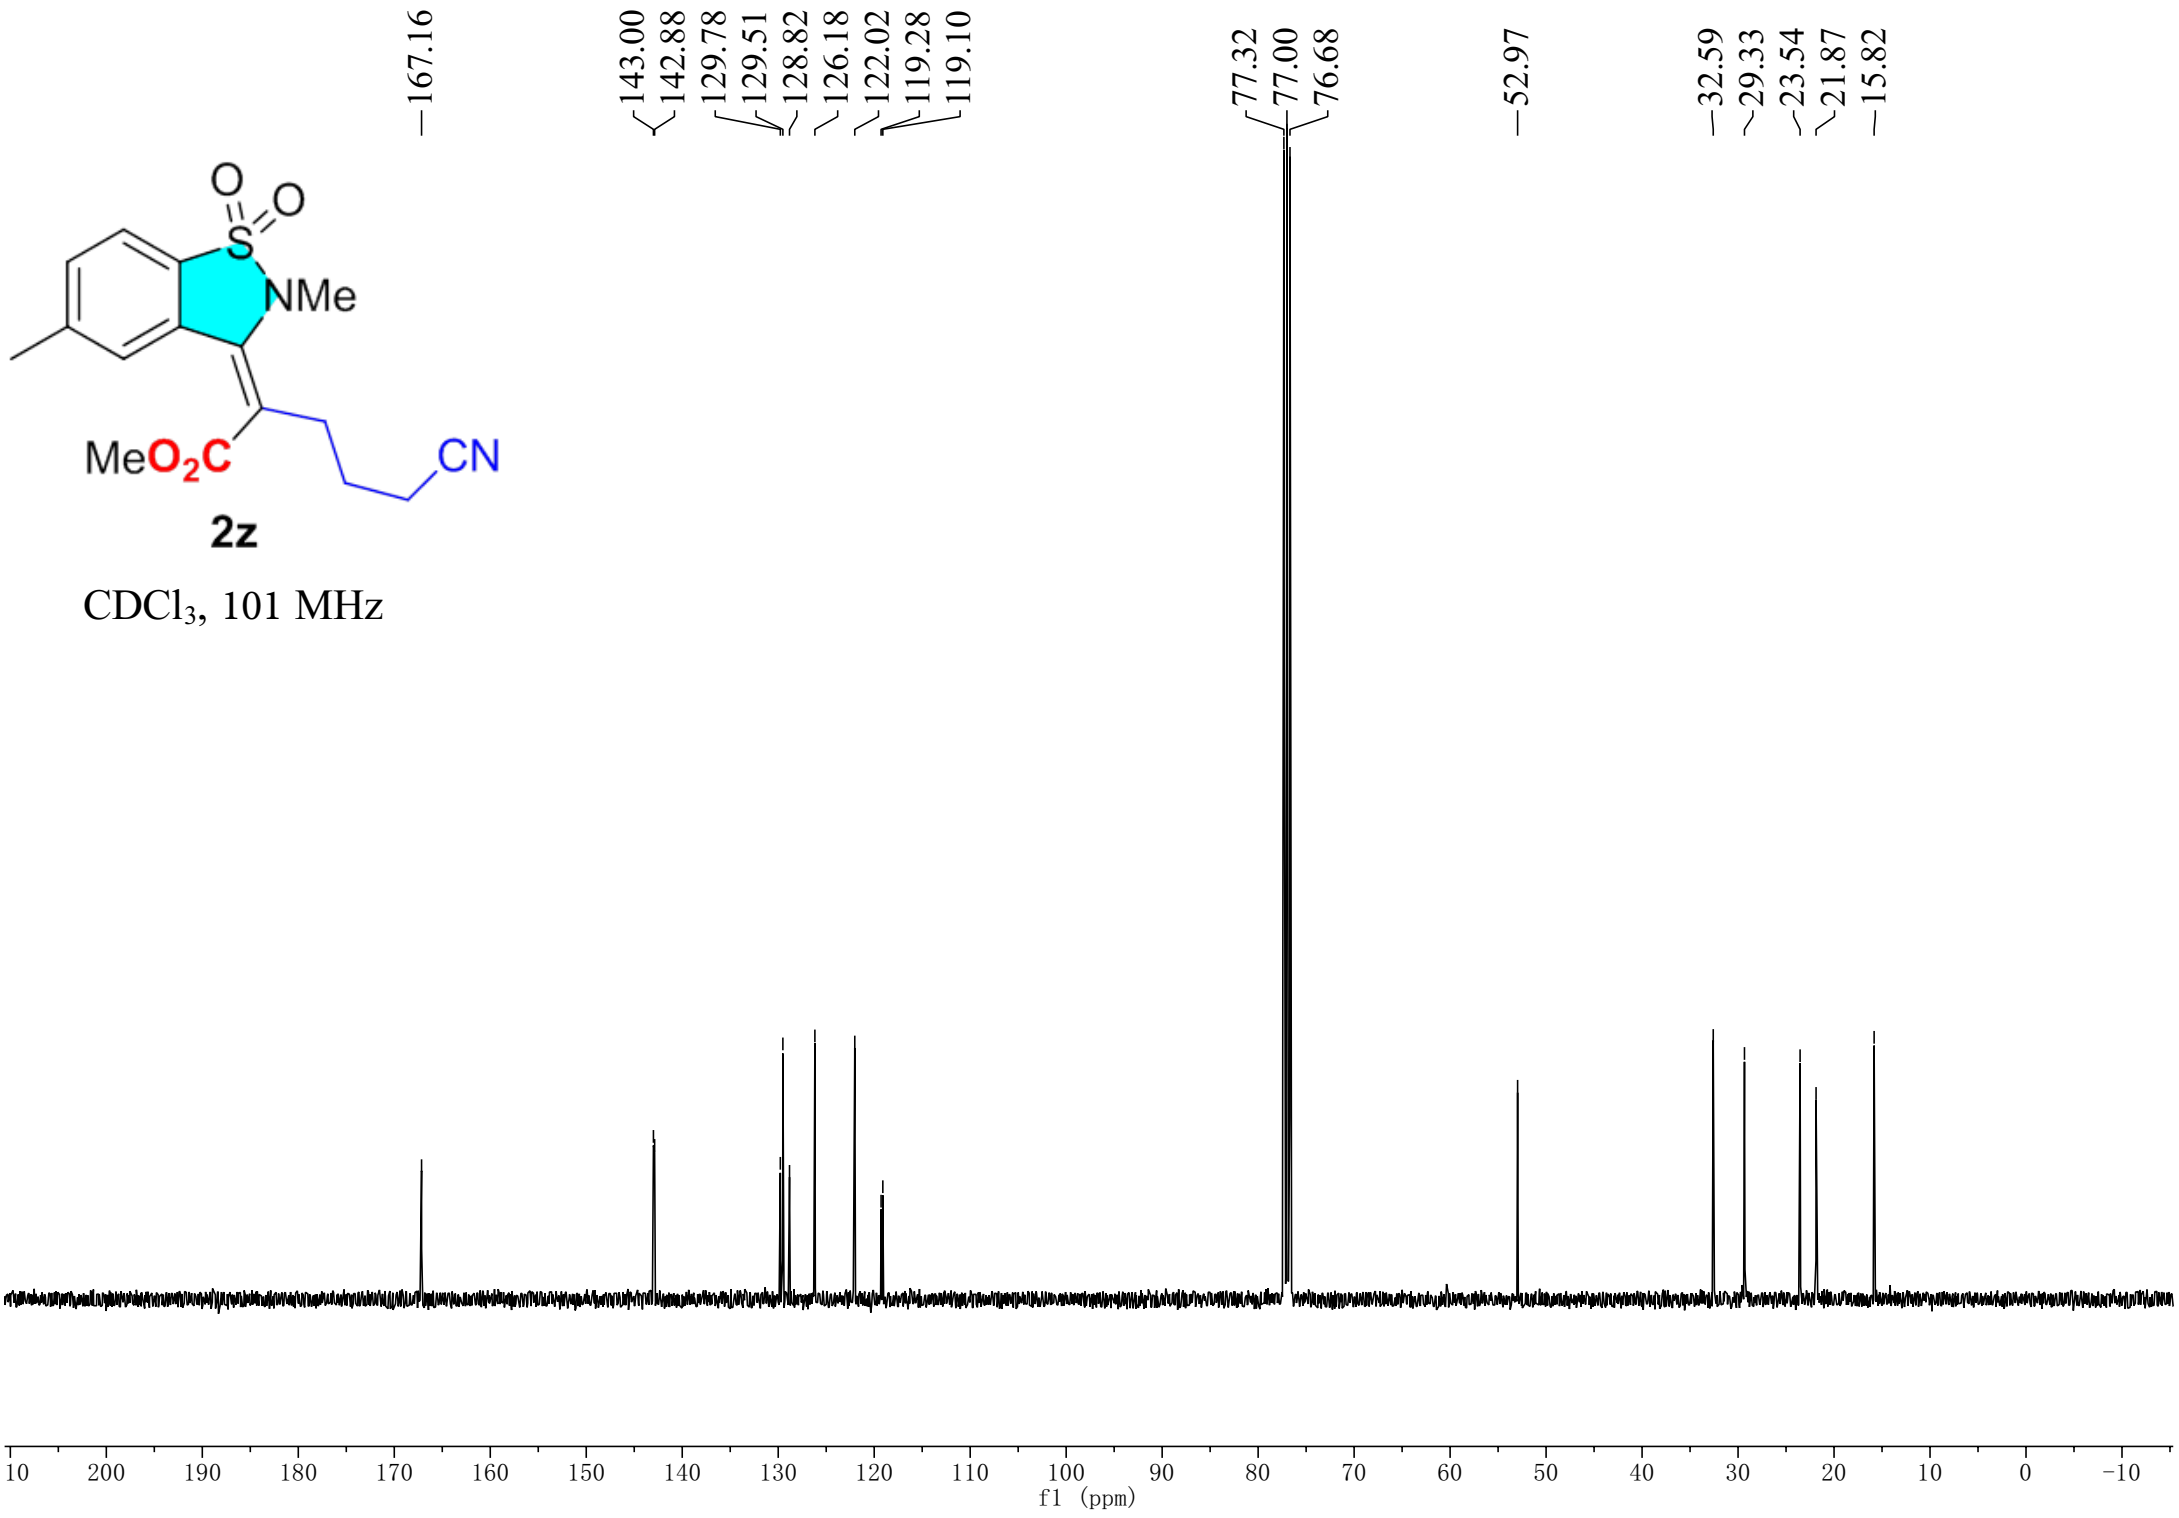

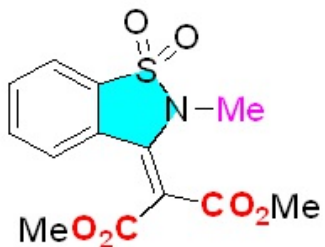

4a

CDCl<sub>3</sub>, 400 MHz

7.9056  
7.9039  
7.9010  
7.8870  
7.8848  
7.8833  
7.8814  
7.7602  
7.7577  
7.7551  
7.7397  
7.7375  
7.7354  
7.7319  
7.7164  
7.7133  
7.6980  
7.6944  
7.6866  
7.6828  
7.6671  
7.6635  
7.6482  
7.6448  
7.2600  
3.8912  
3.8506  
3.1943

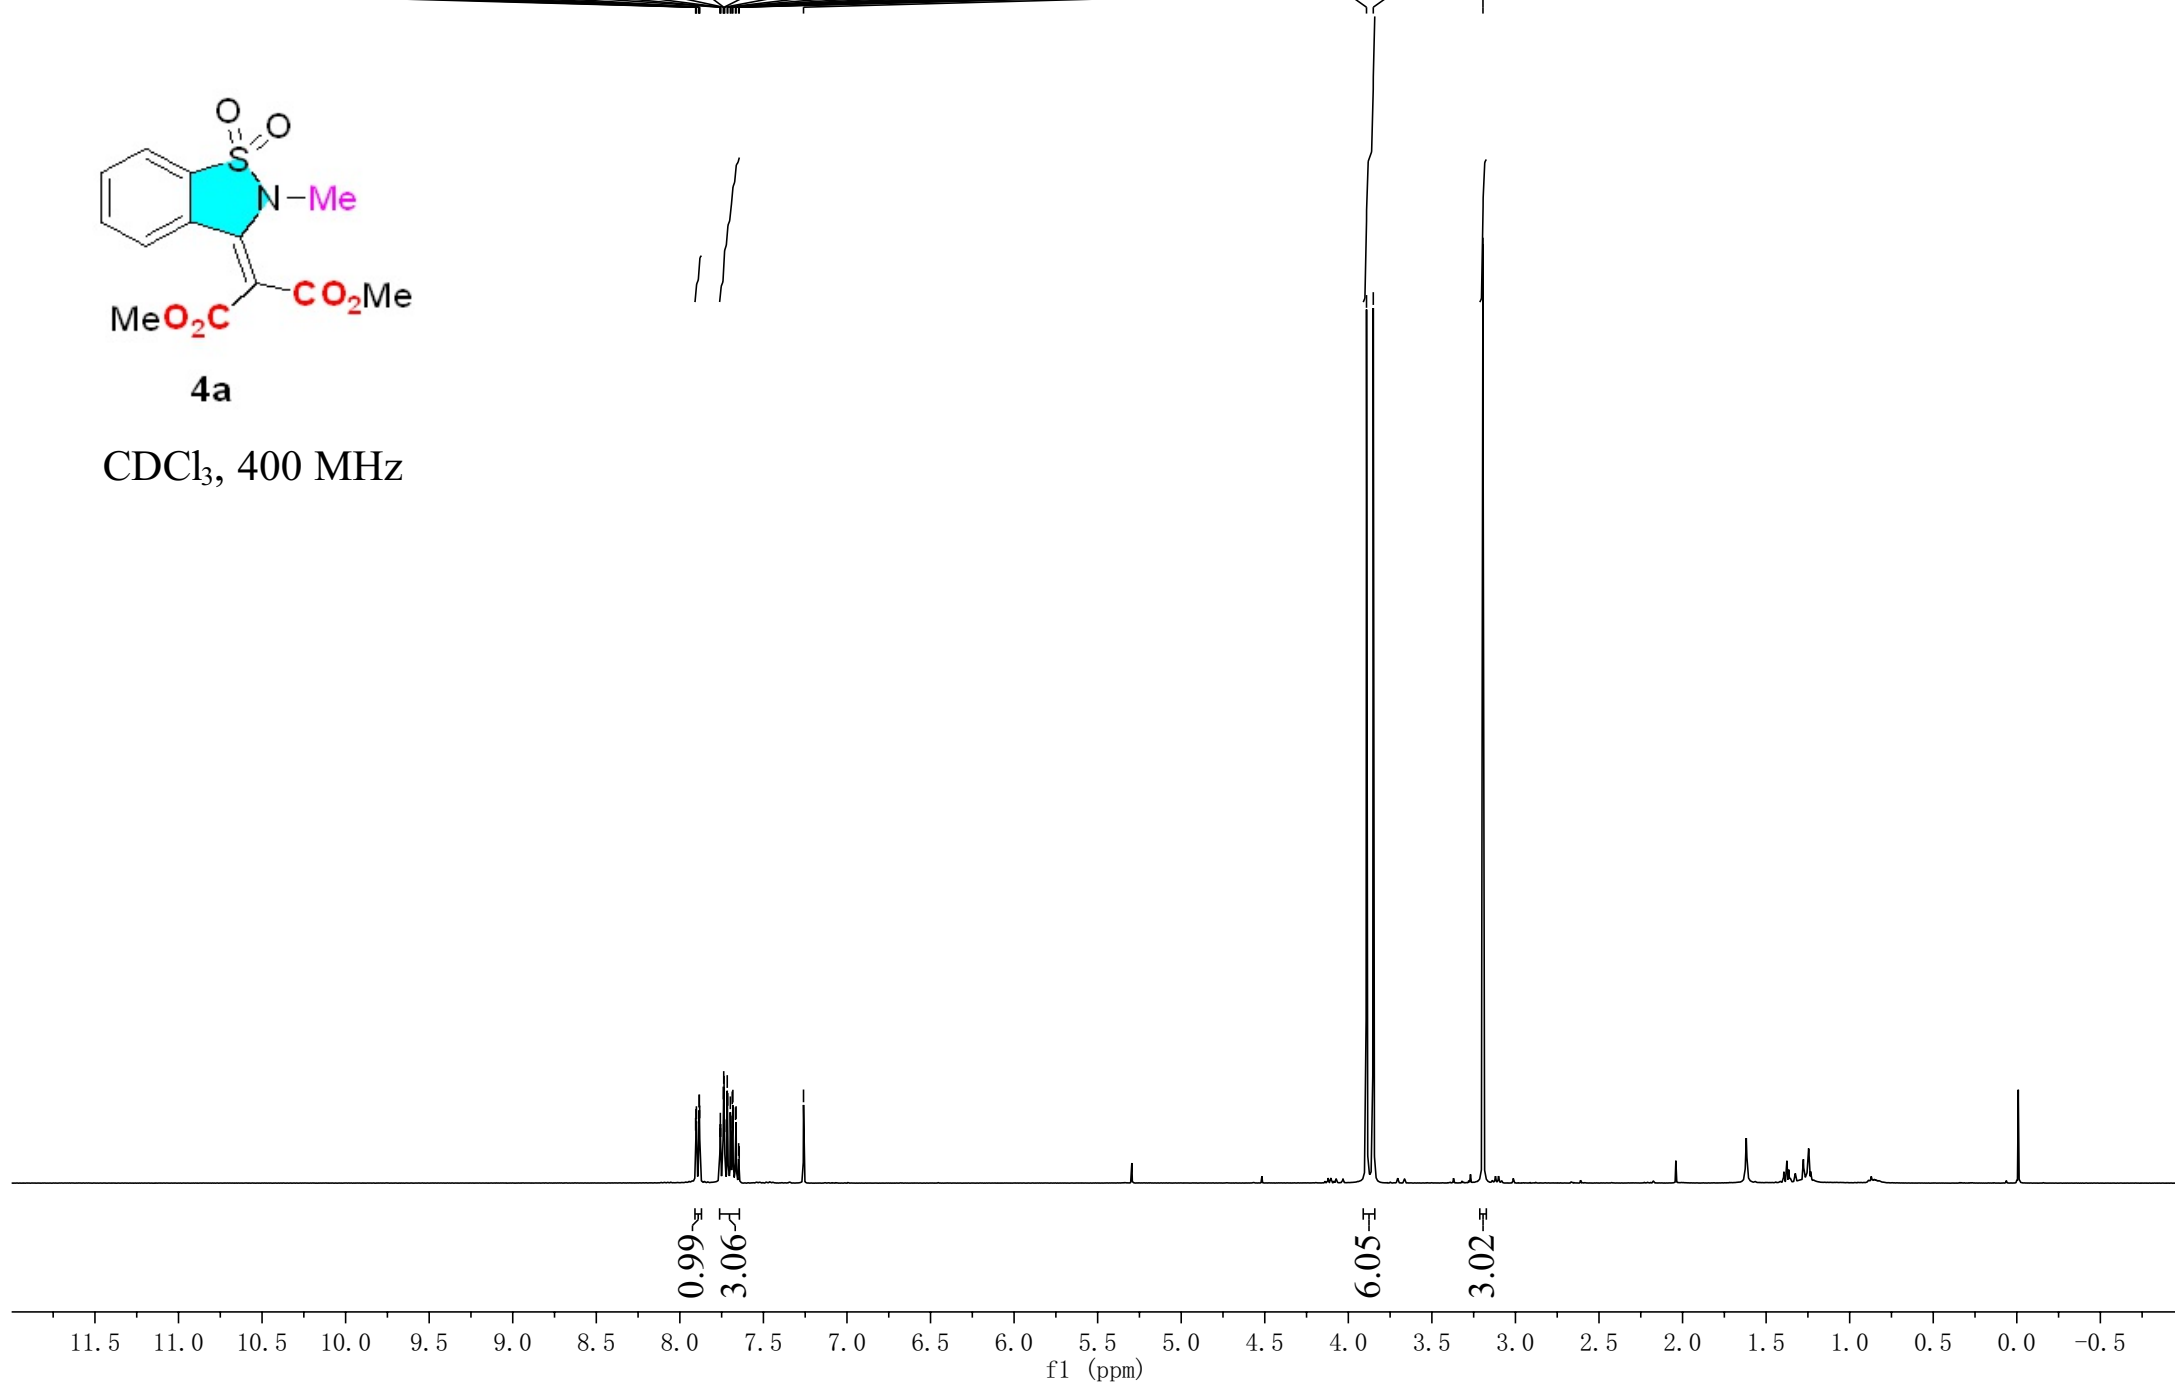

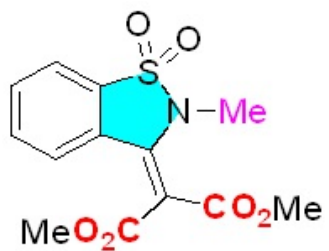

4a

CDCl<sub>3</sub>, 101 MHz

~166.73  
~164.34

-145.26  
133.68  
132.62  
132.08  
128.19  
125.94  
121.66

-101.89

77.32  
77.00  
76.68

53.20  
52.83

-30.73

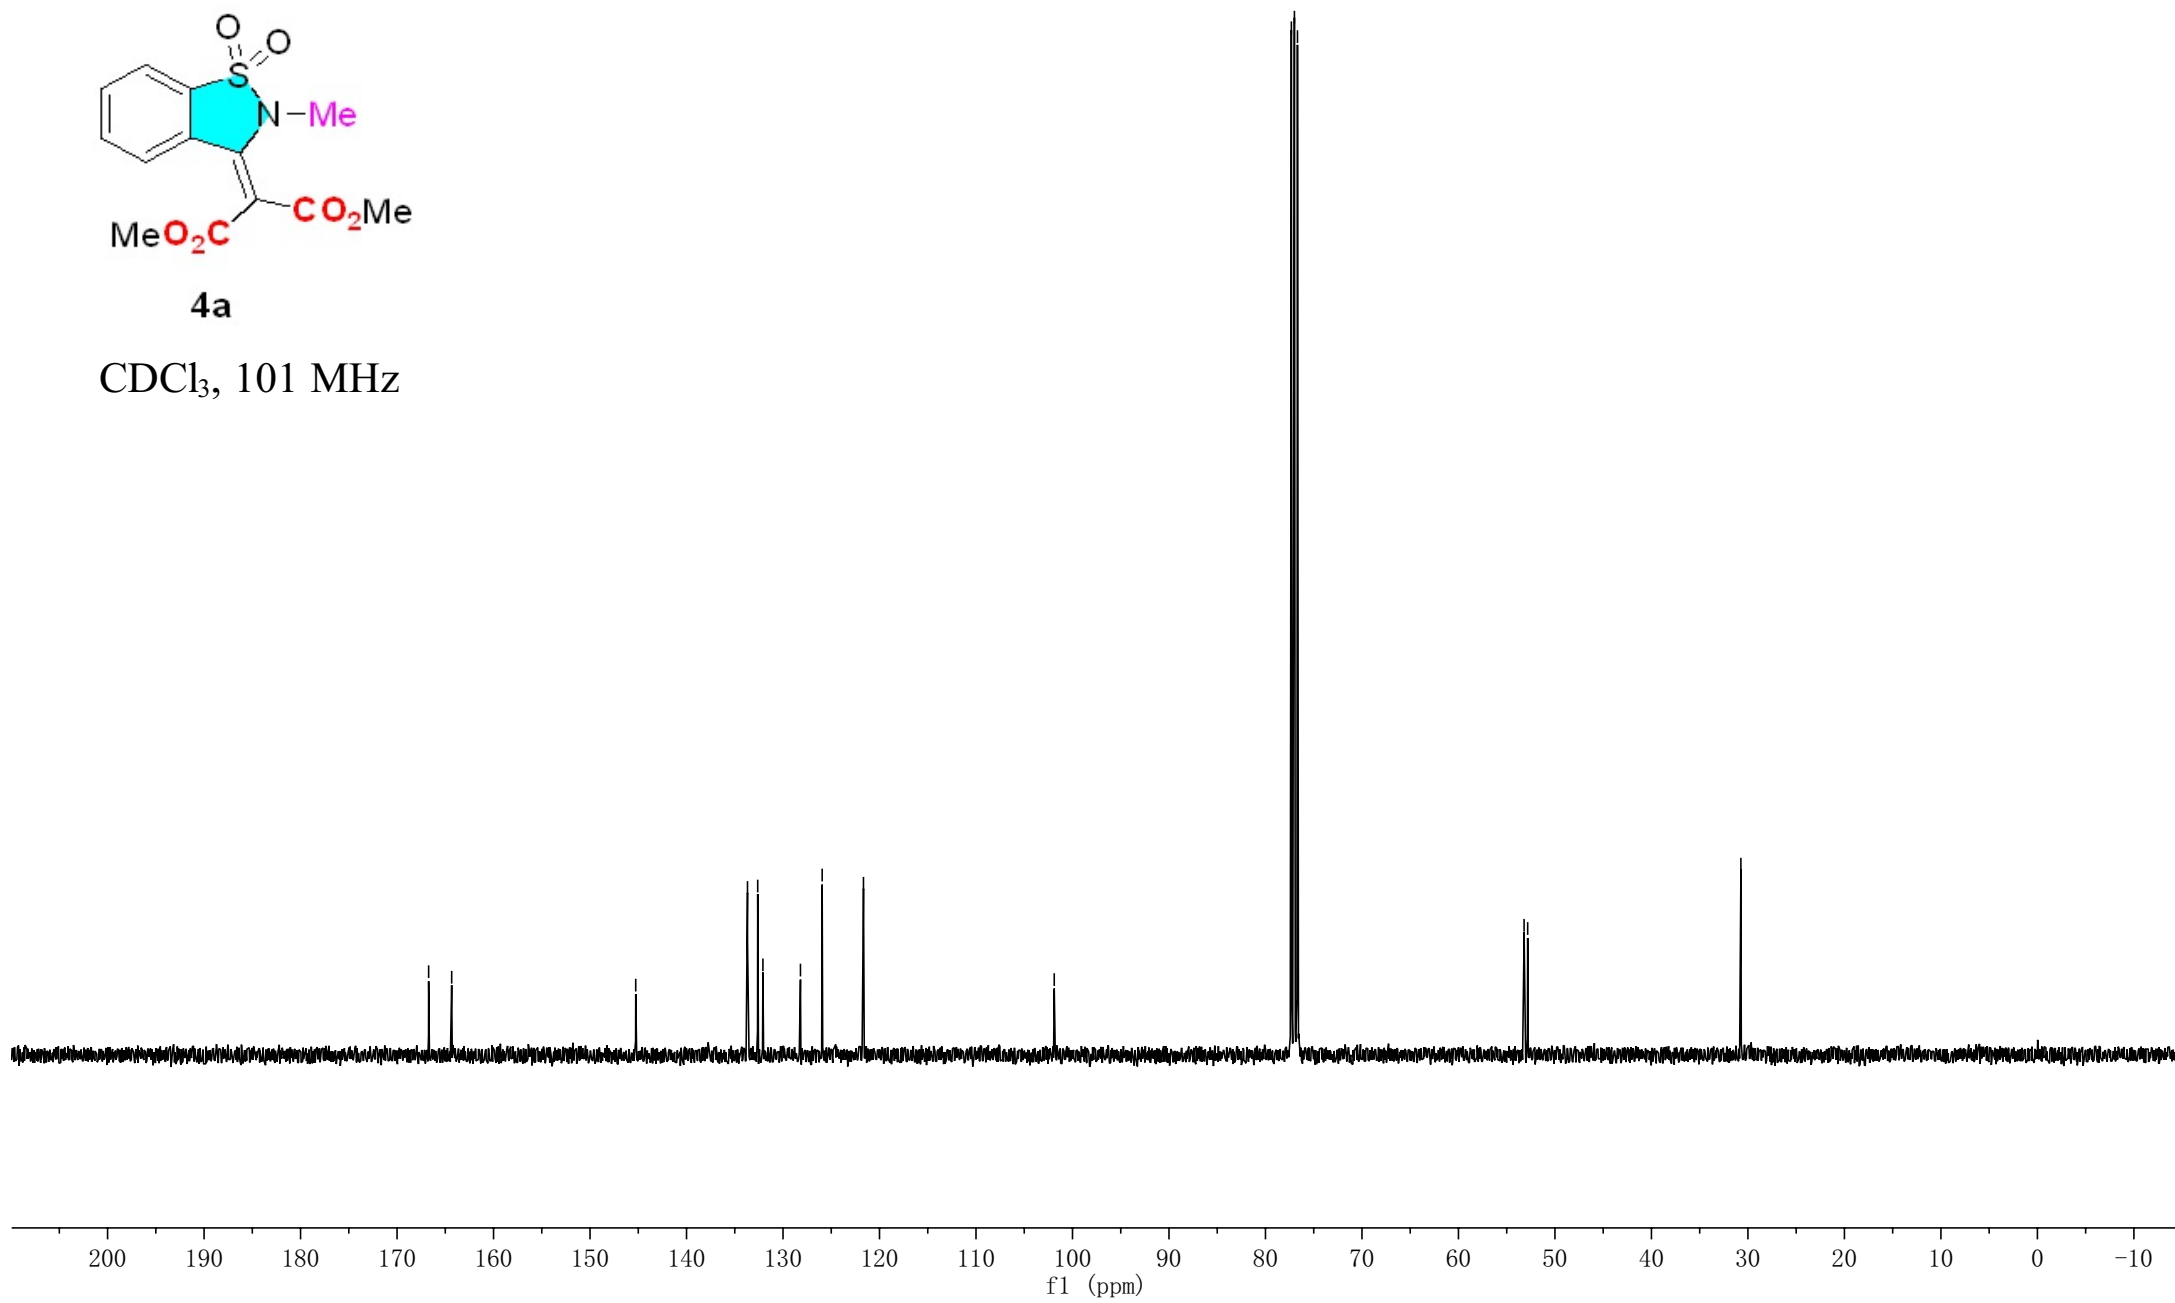

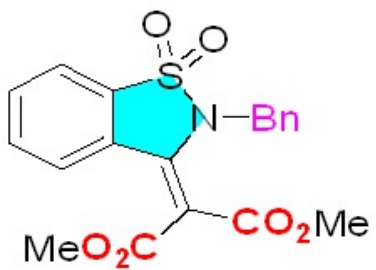

4b

CDCl<sub>3</sub>, 400 MHz

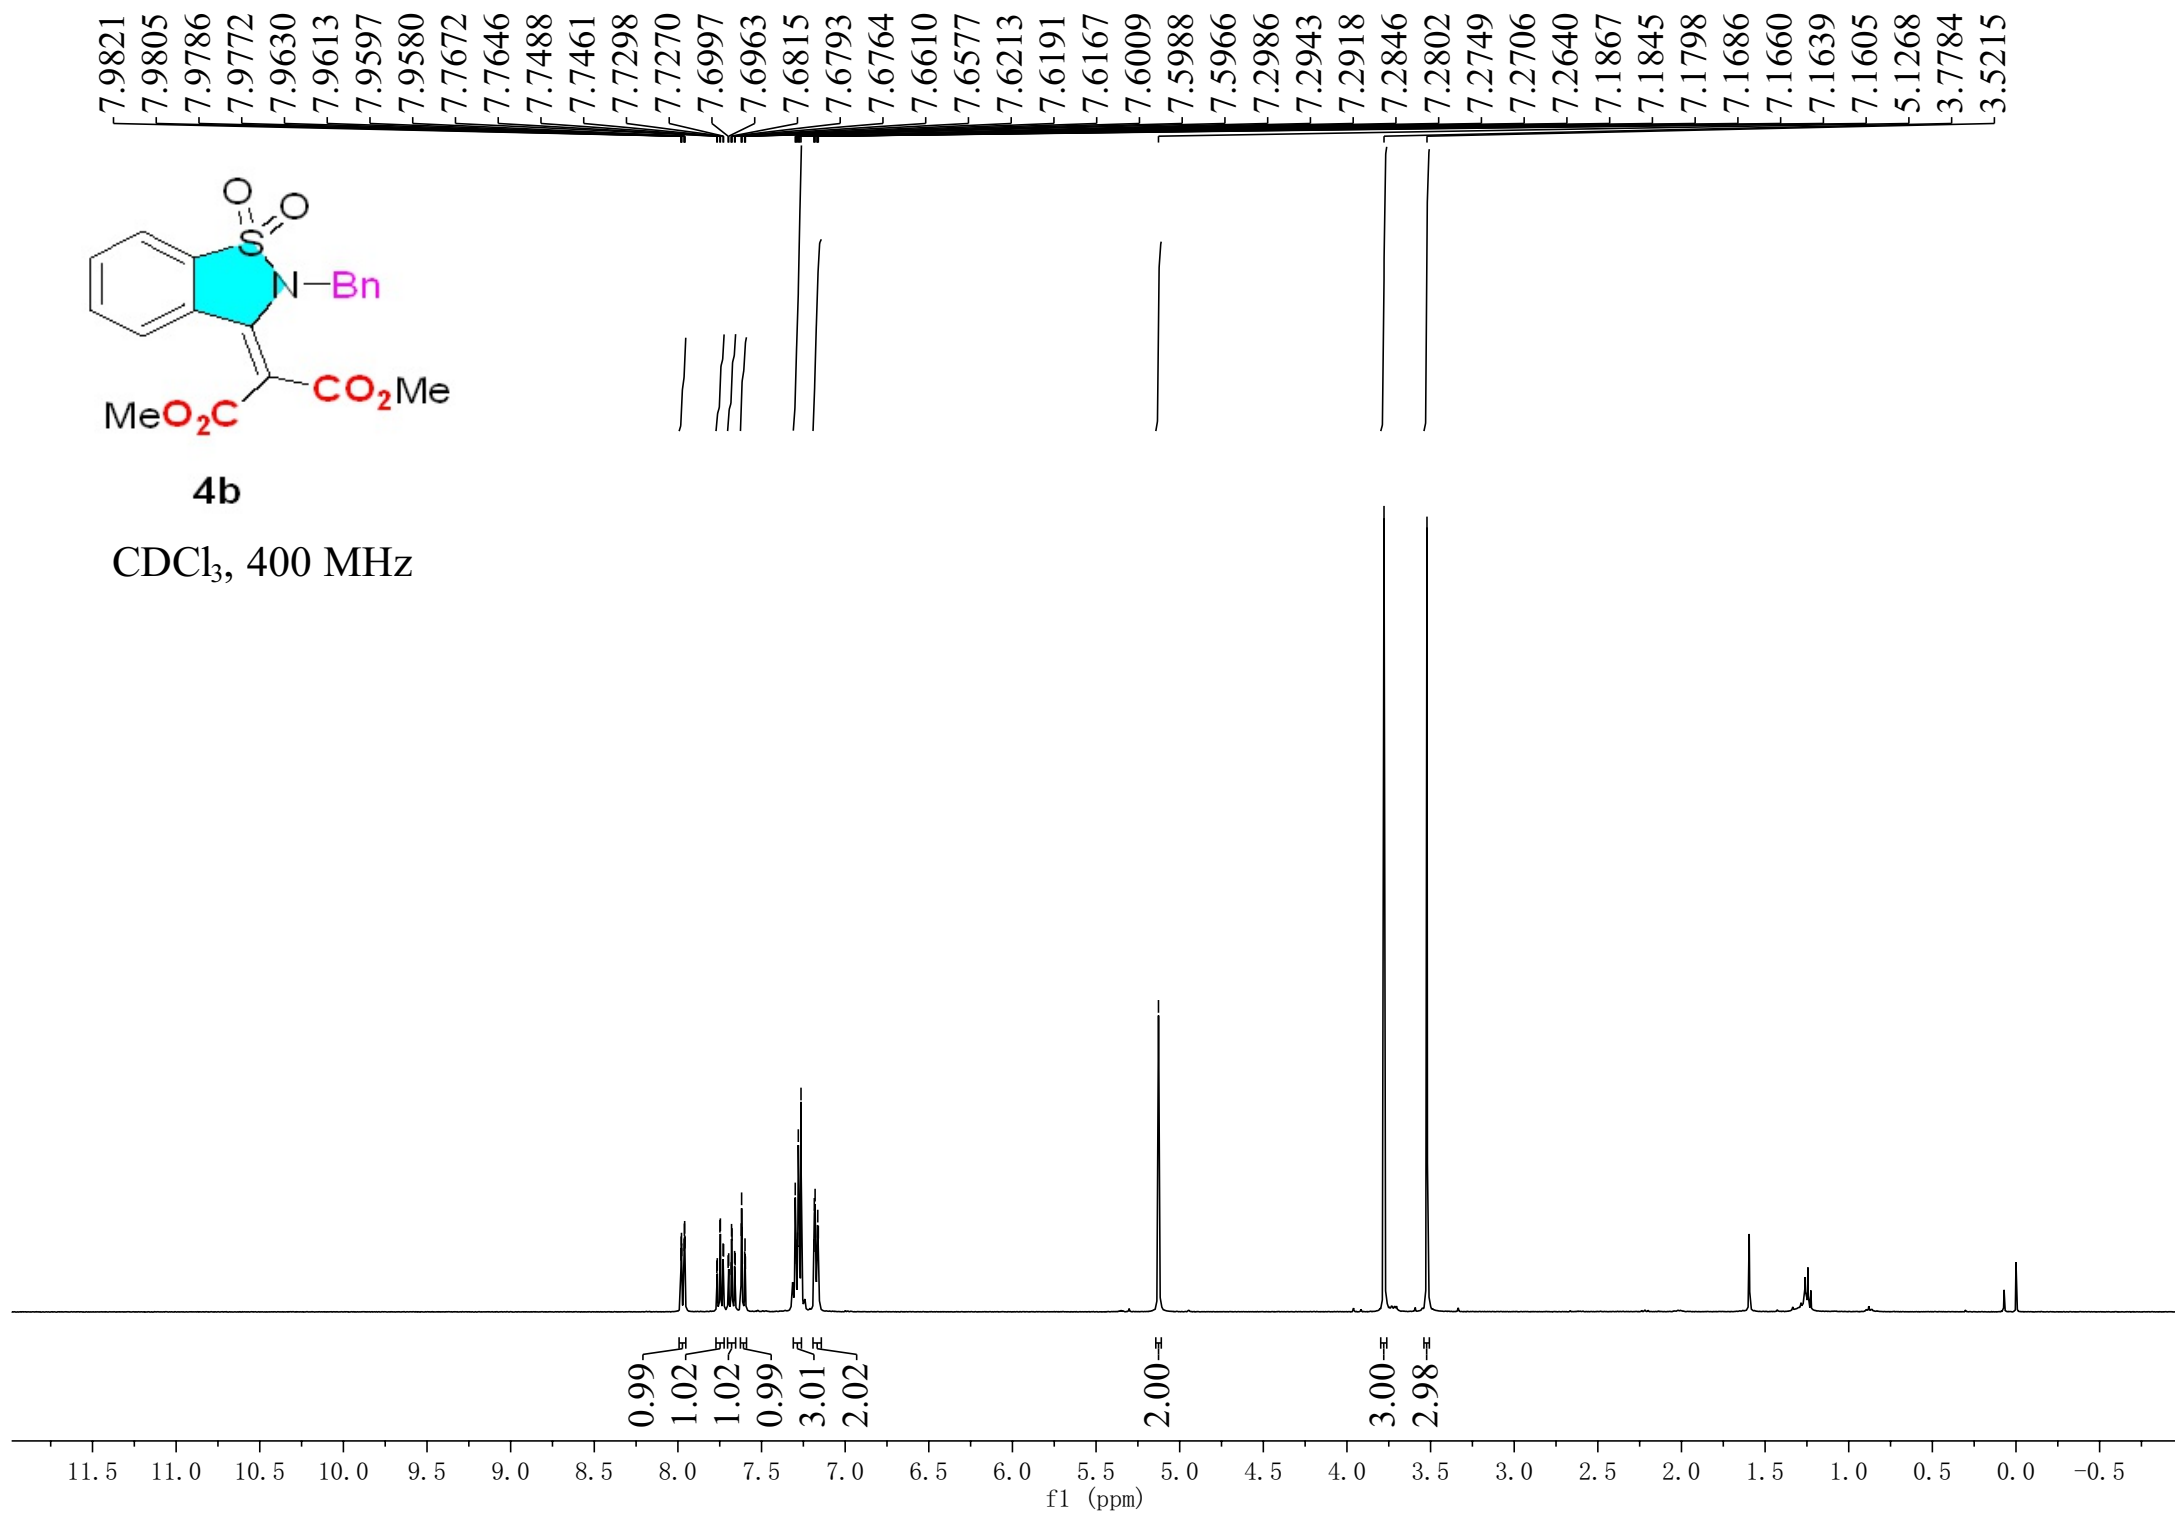

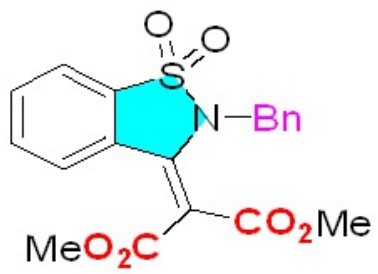

4b

CDCl<sub>3</sub>, 101 MHz

~166.54  
~163.40  
140.68  
133.73  
132.48  
132.41  
131.78  
128.55  
128.40  
128.00  
127.57  
125.50  
121.82  
-104.23

77.32  
77.00  
76.68

~53.18  
~52.41  
~46.75

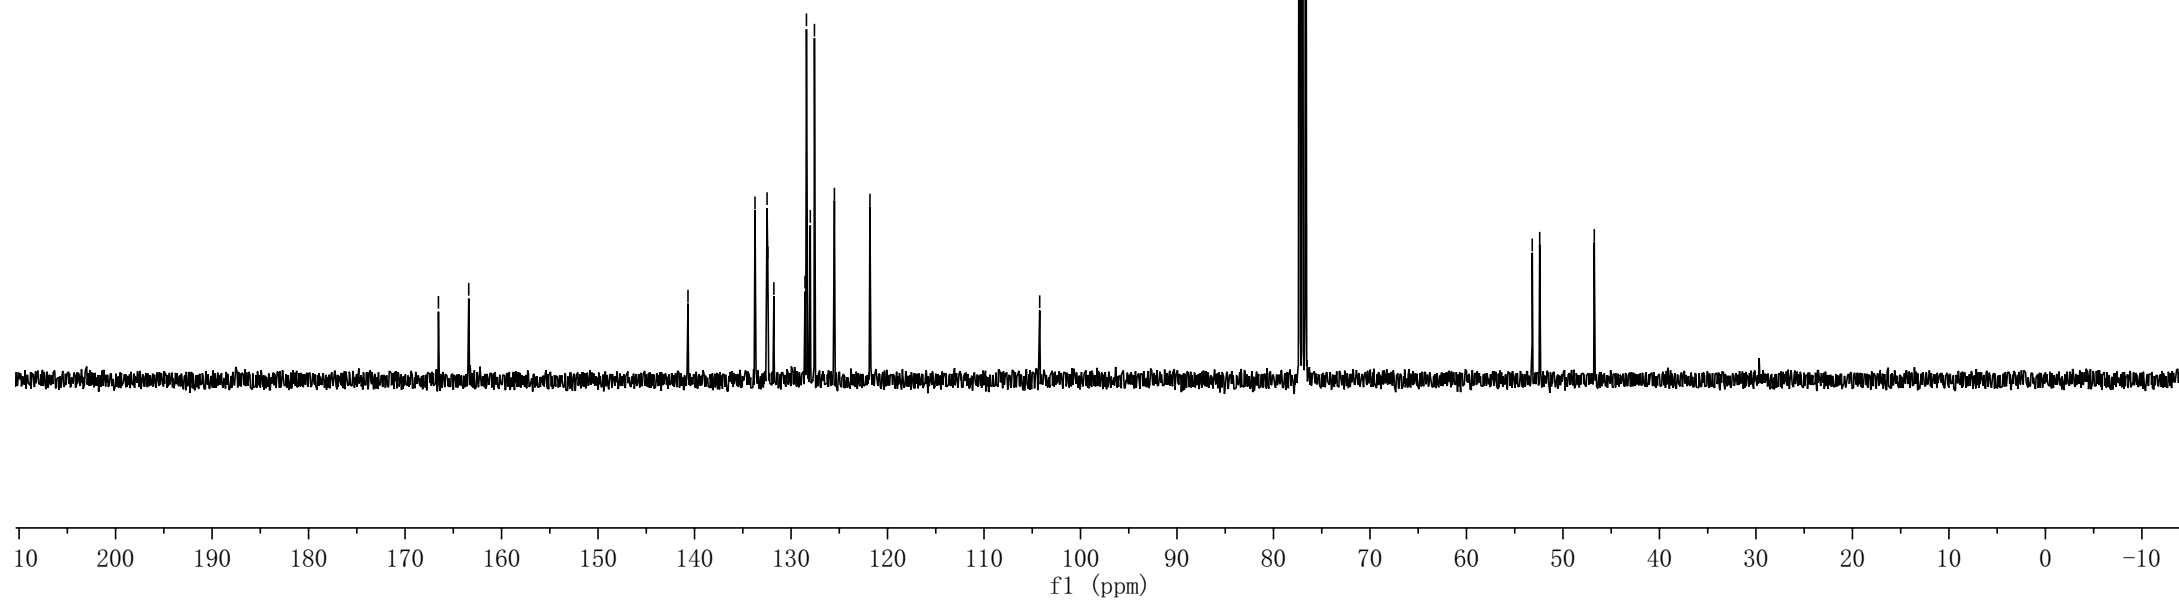

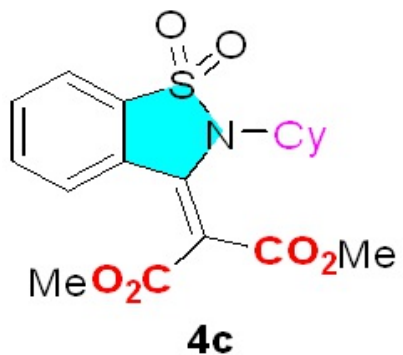

CDCl<sub>3</sub>, 400 MHz

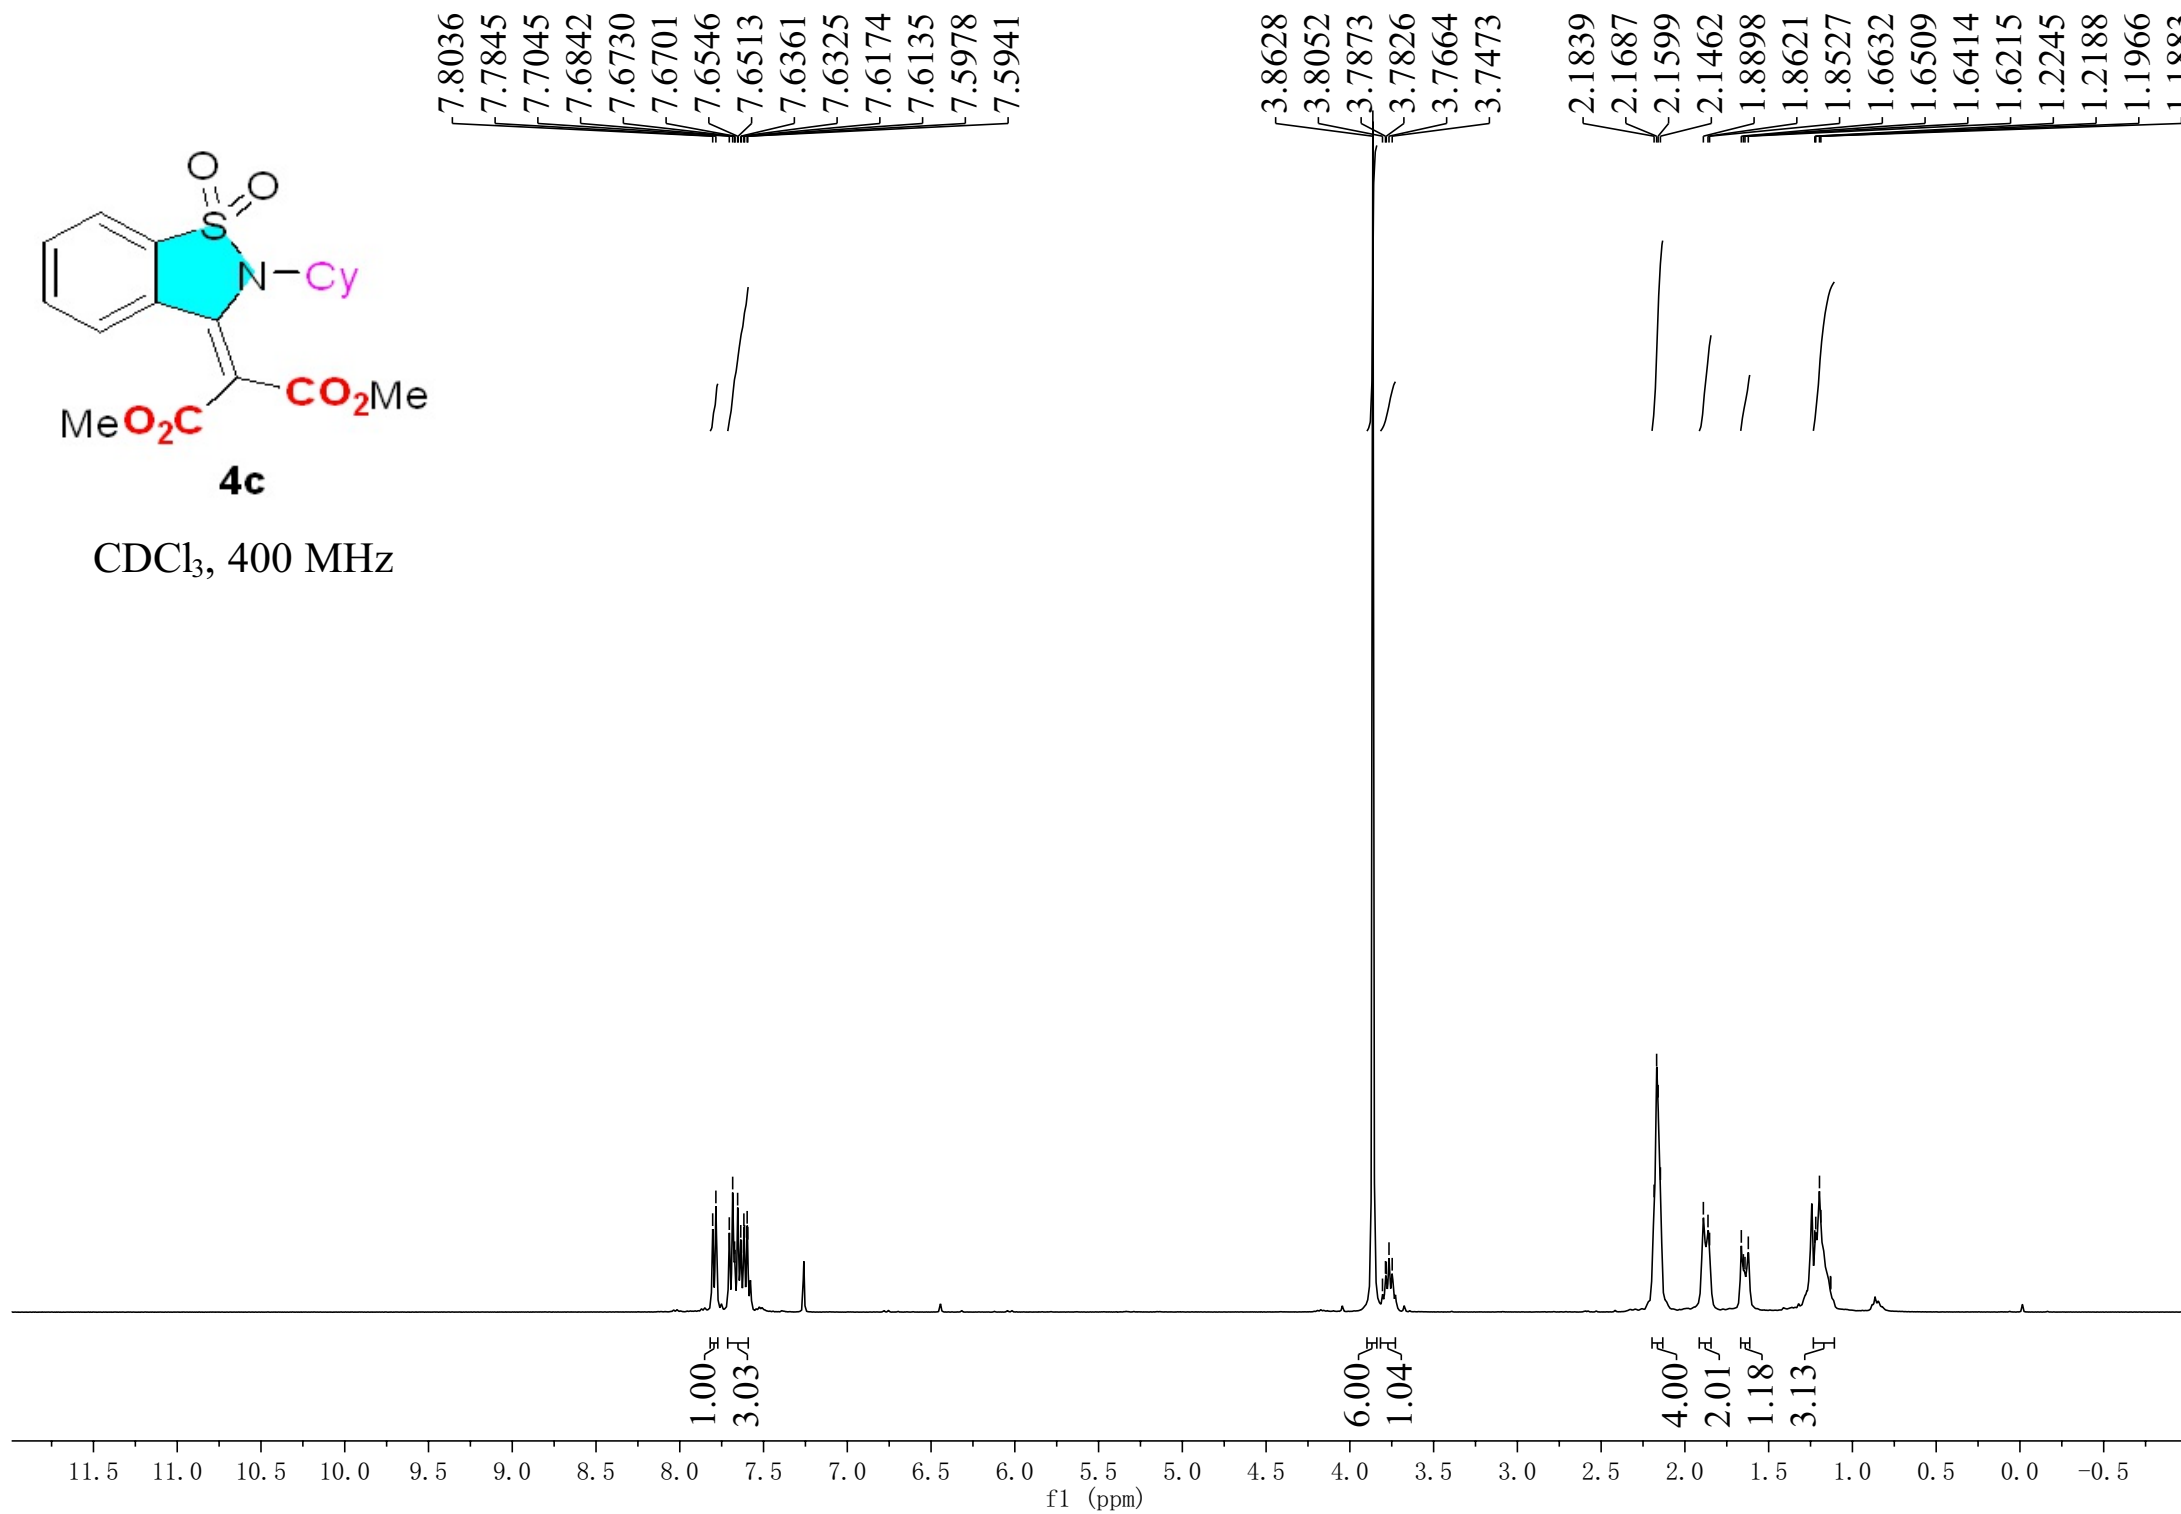

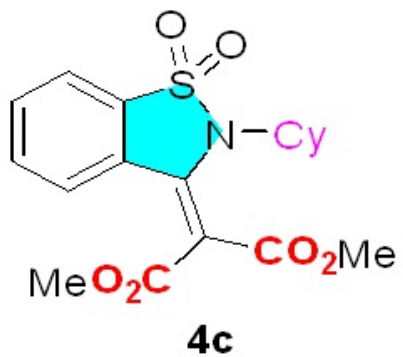

CDCl<sub>3</sub>, 101 MHz

~166.65  
~165.09

-144.16  
133.64  
133.20  
132.37  
128.97  
125.50  
120.80

-104.16

77.32  
77.00  
76.68

-62.49

-53.04

29.51  
26.57  
25.08

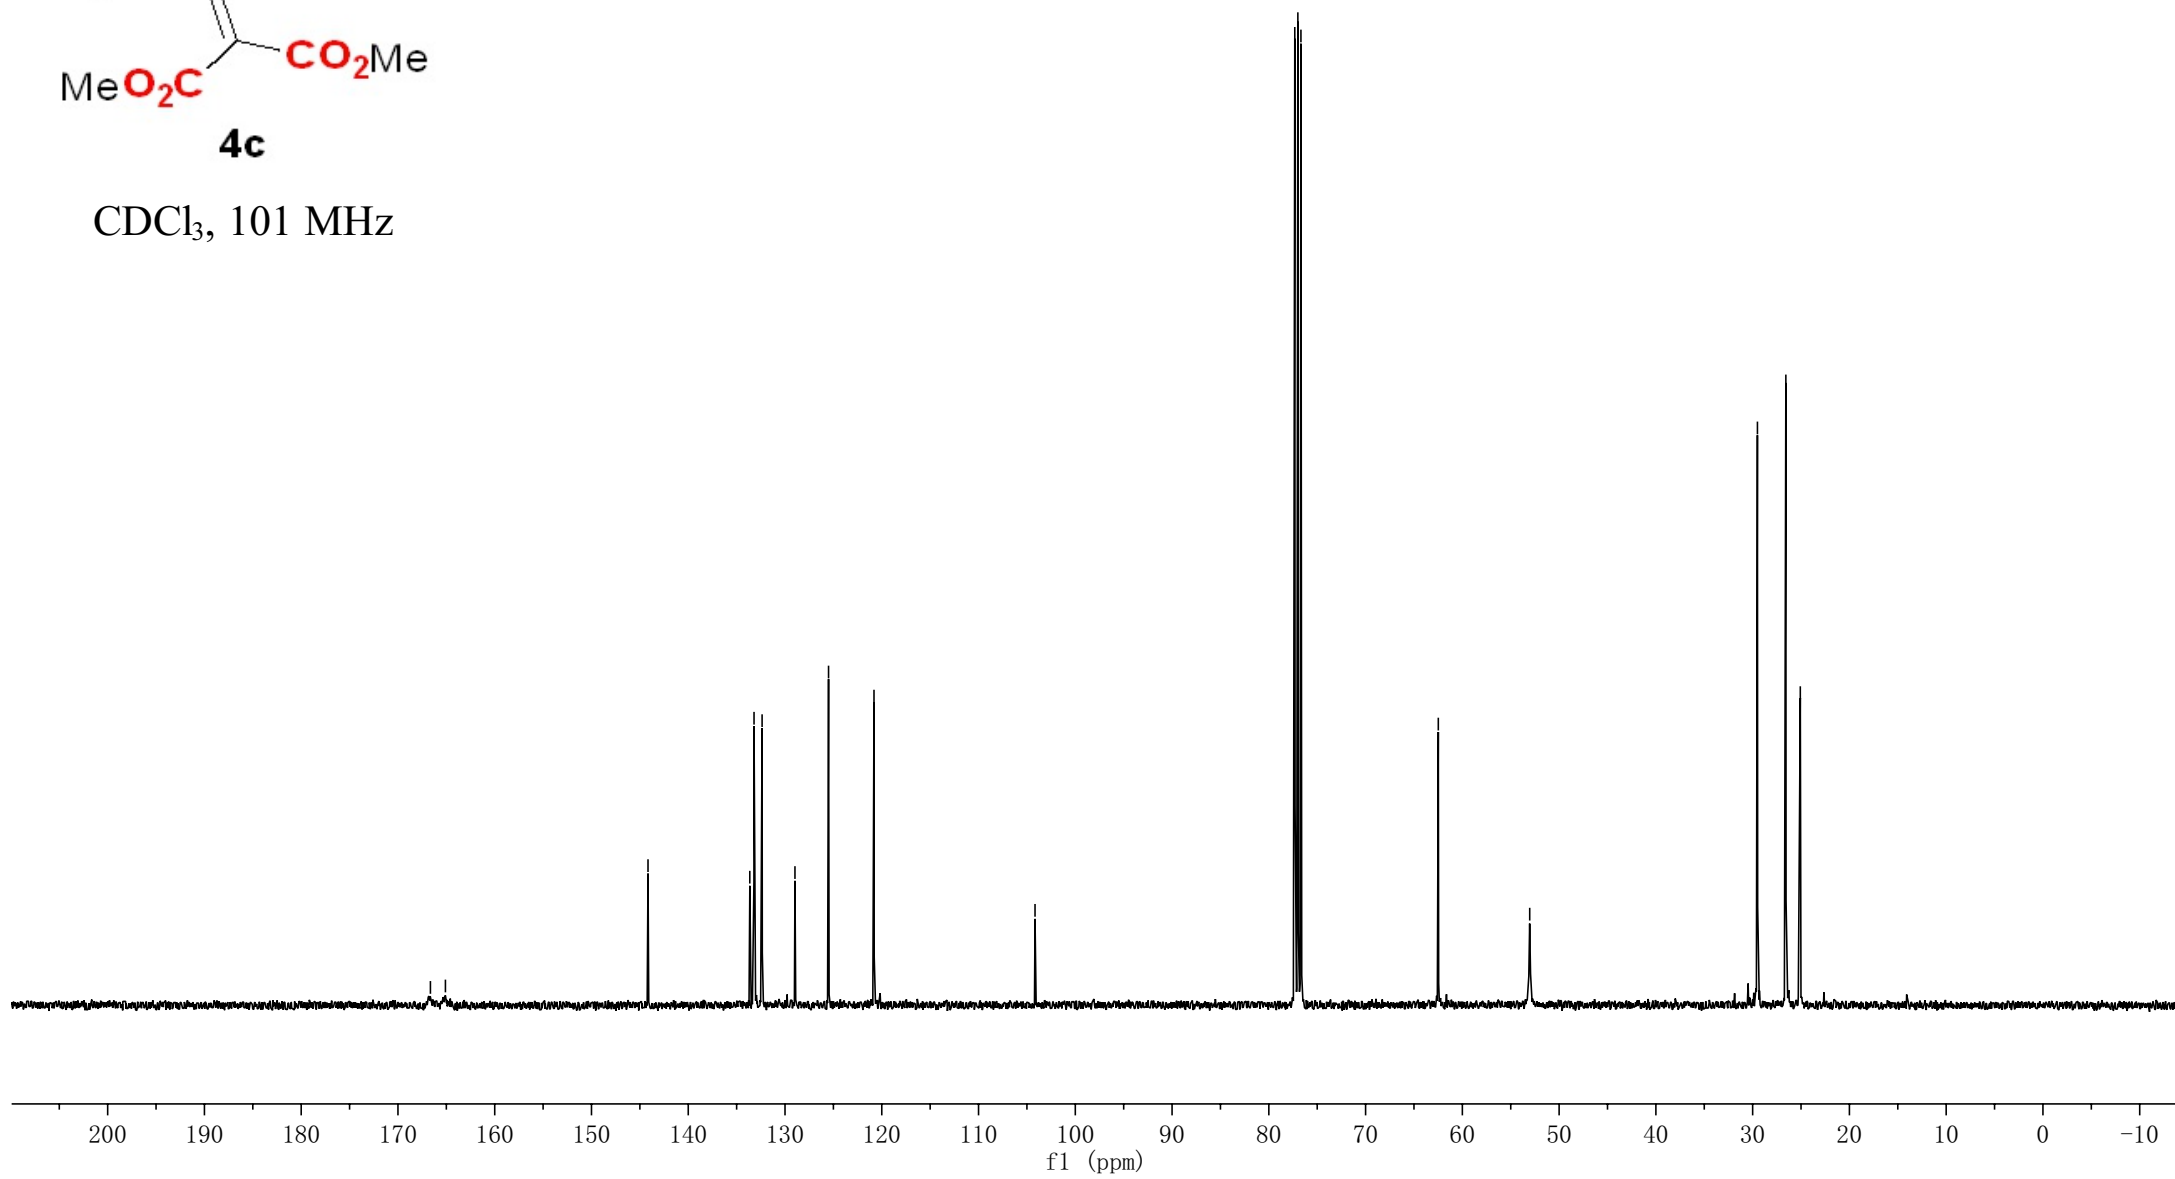

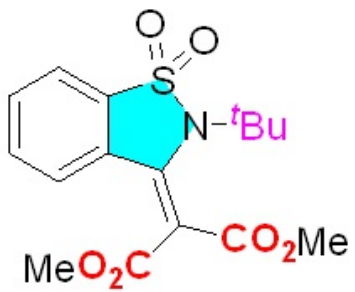

4d'

CDCl<sub>3</sub>, 400 MHz

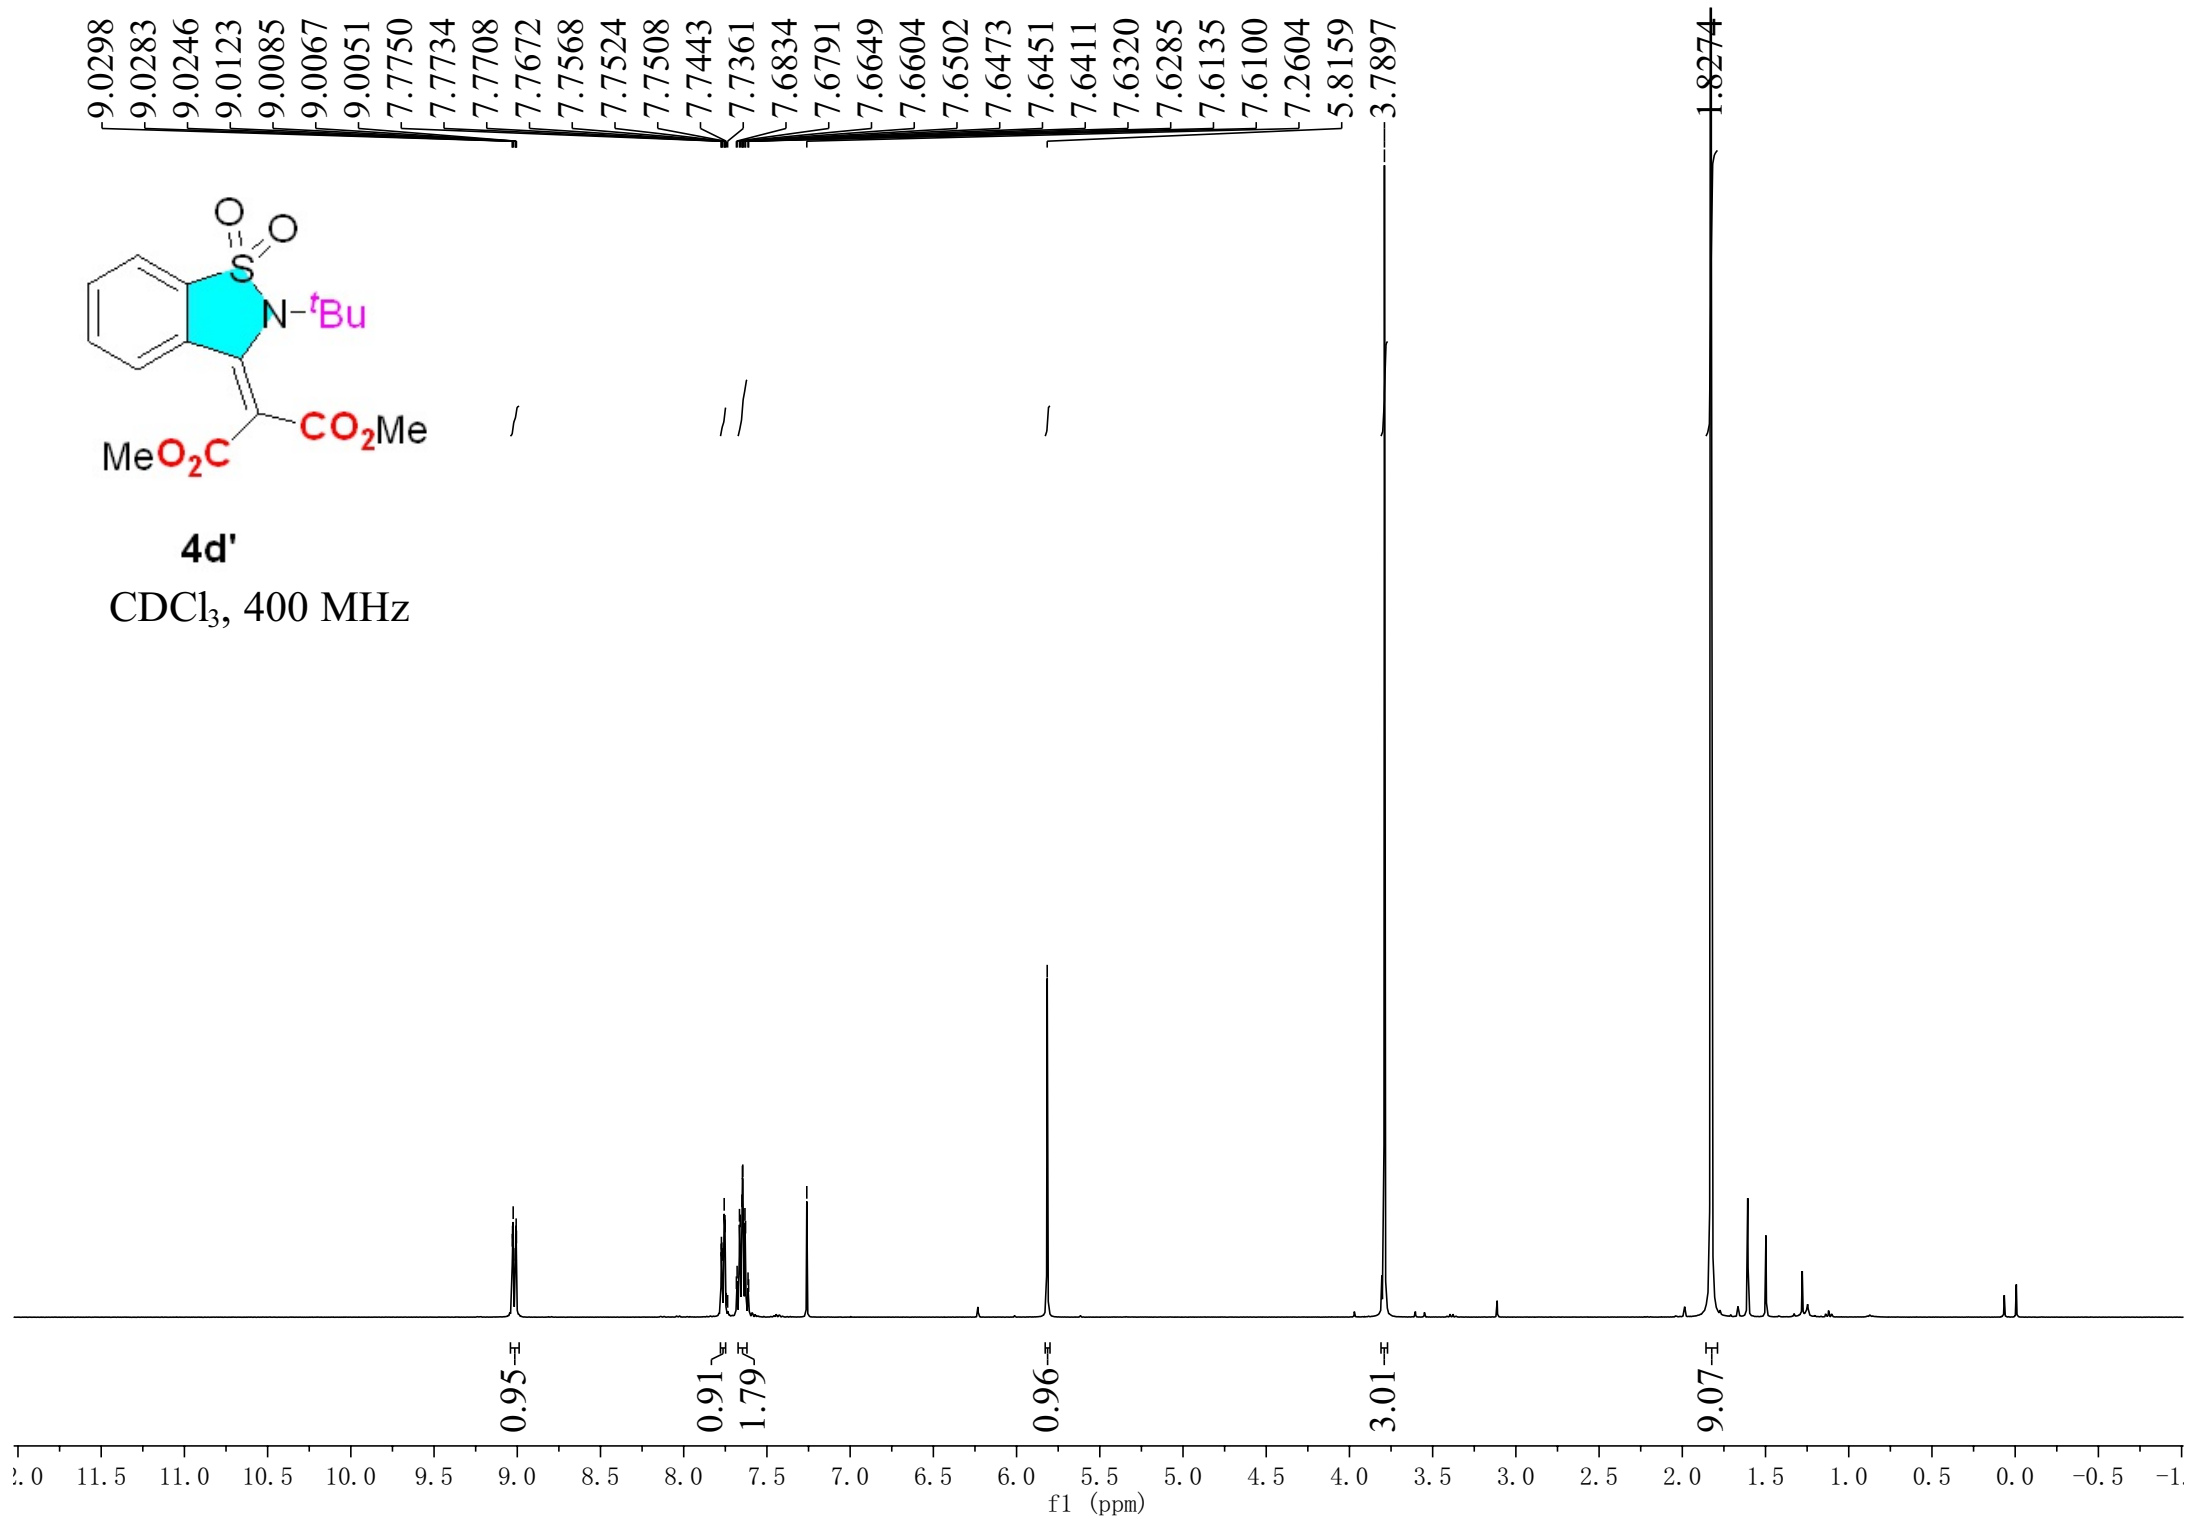





4d'

CDCl<sub>3</sub>, 101 MHz

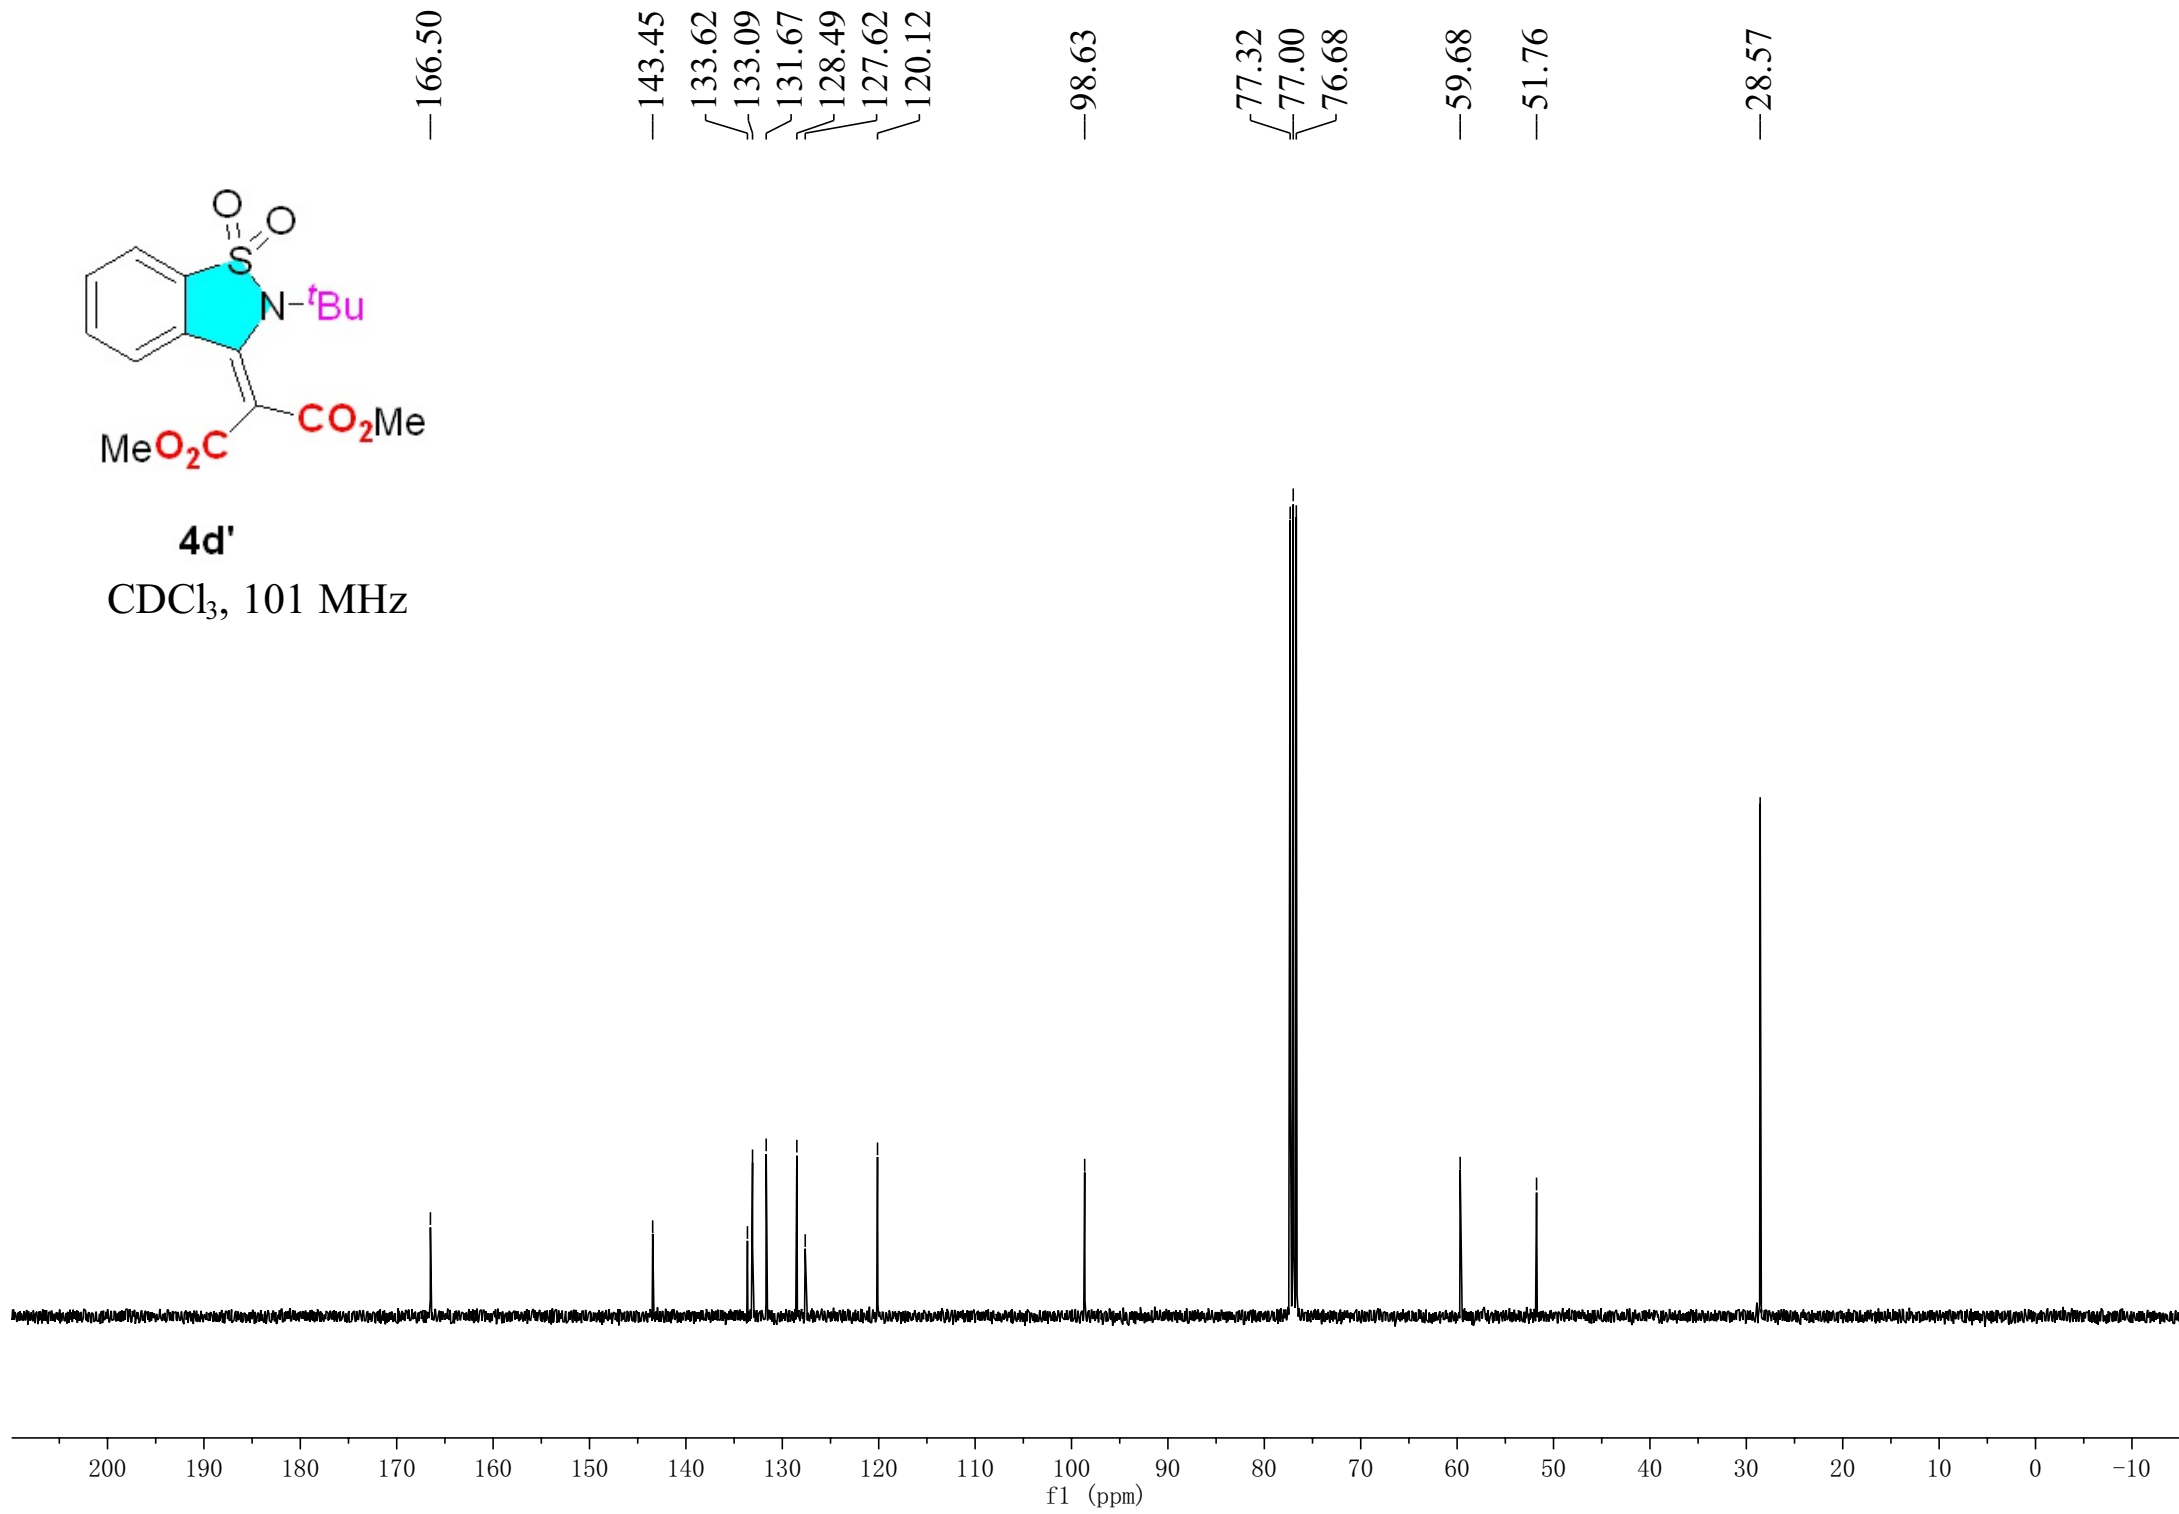

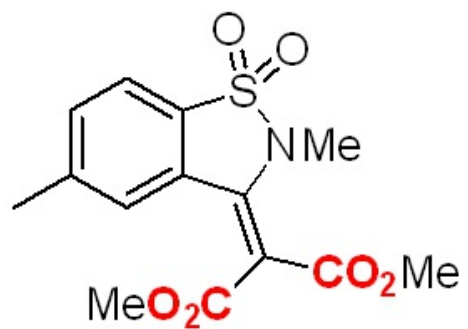

**4f**

CDCl<sub>3</sub>, 400 MHz

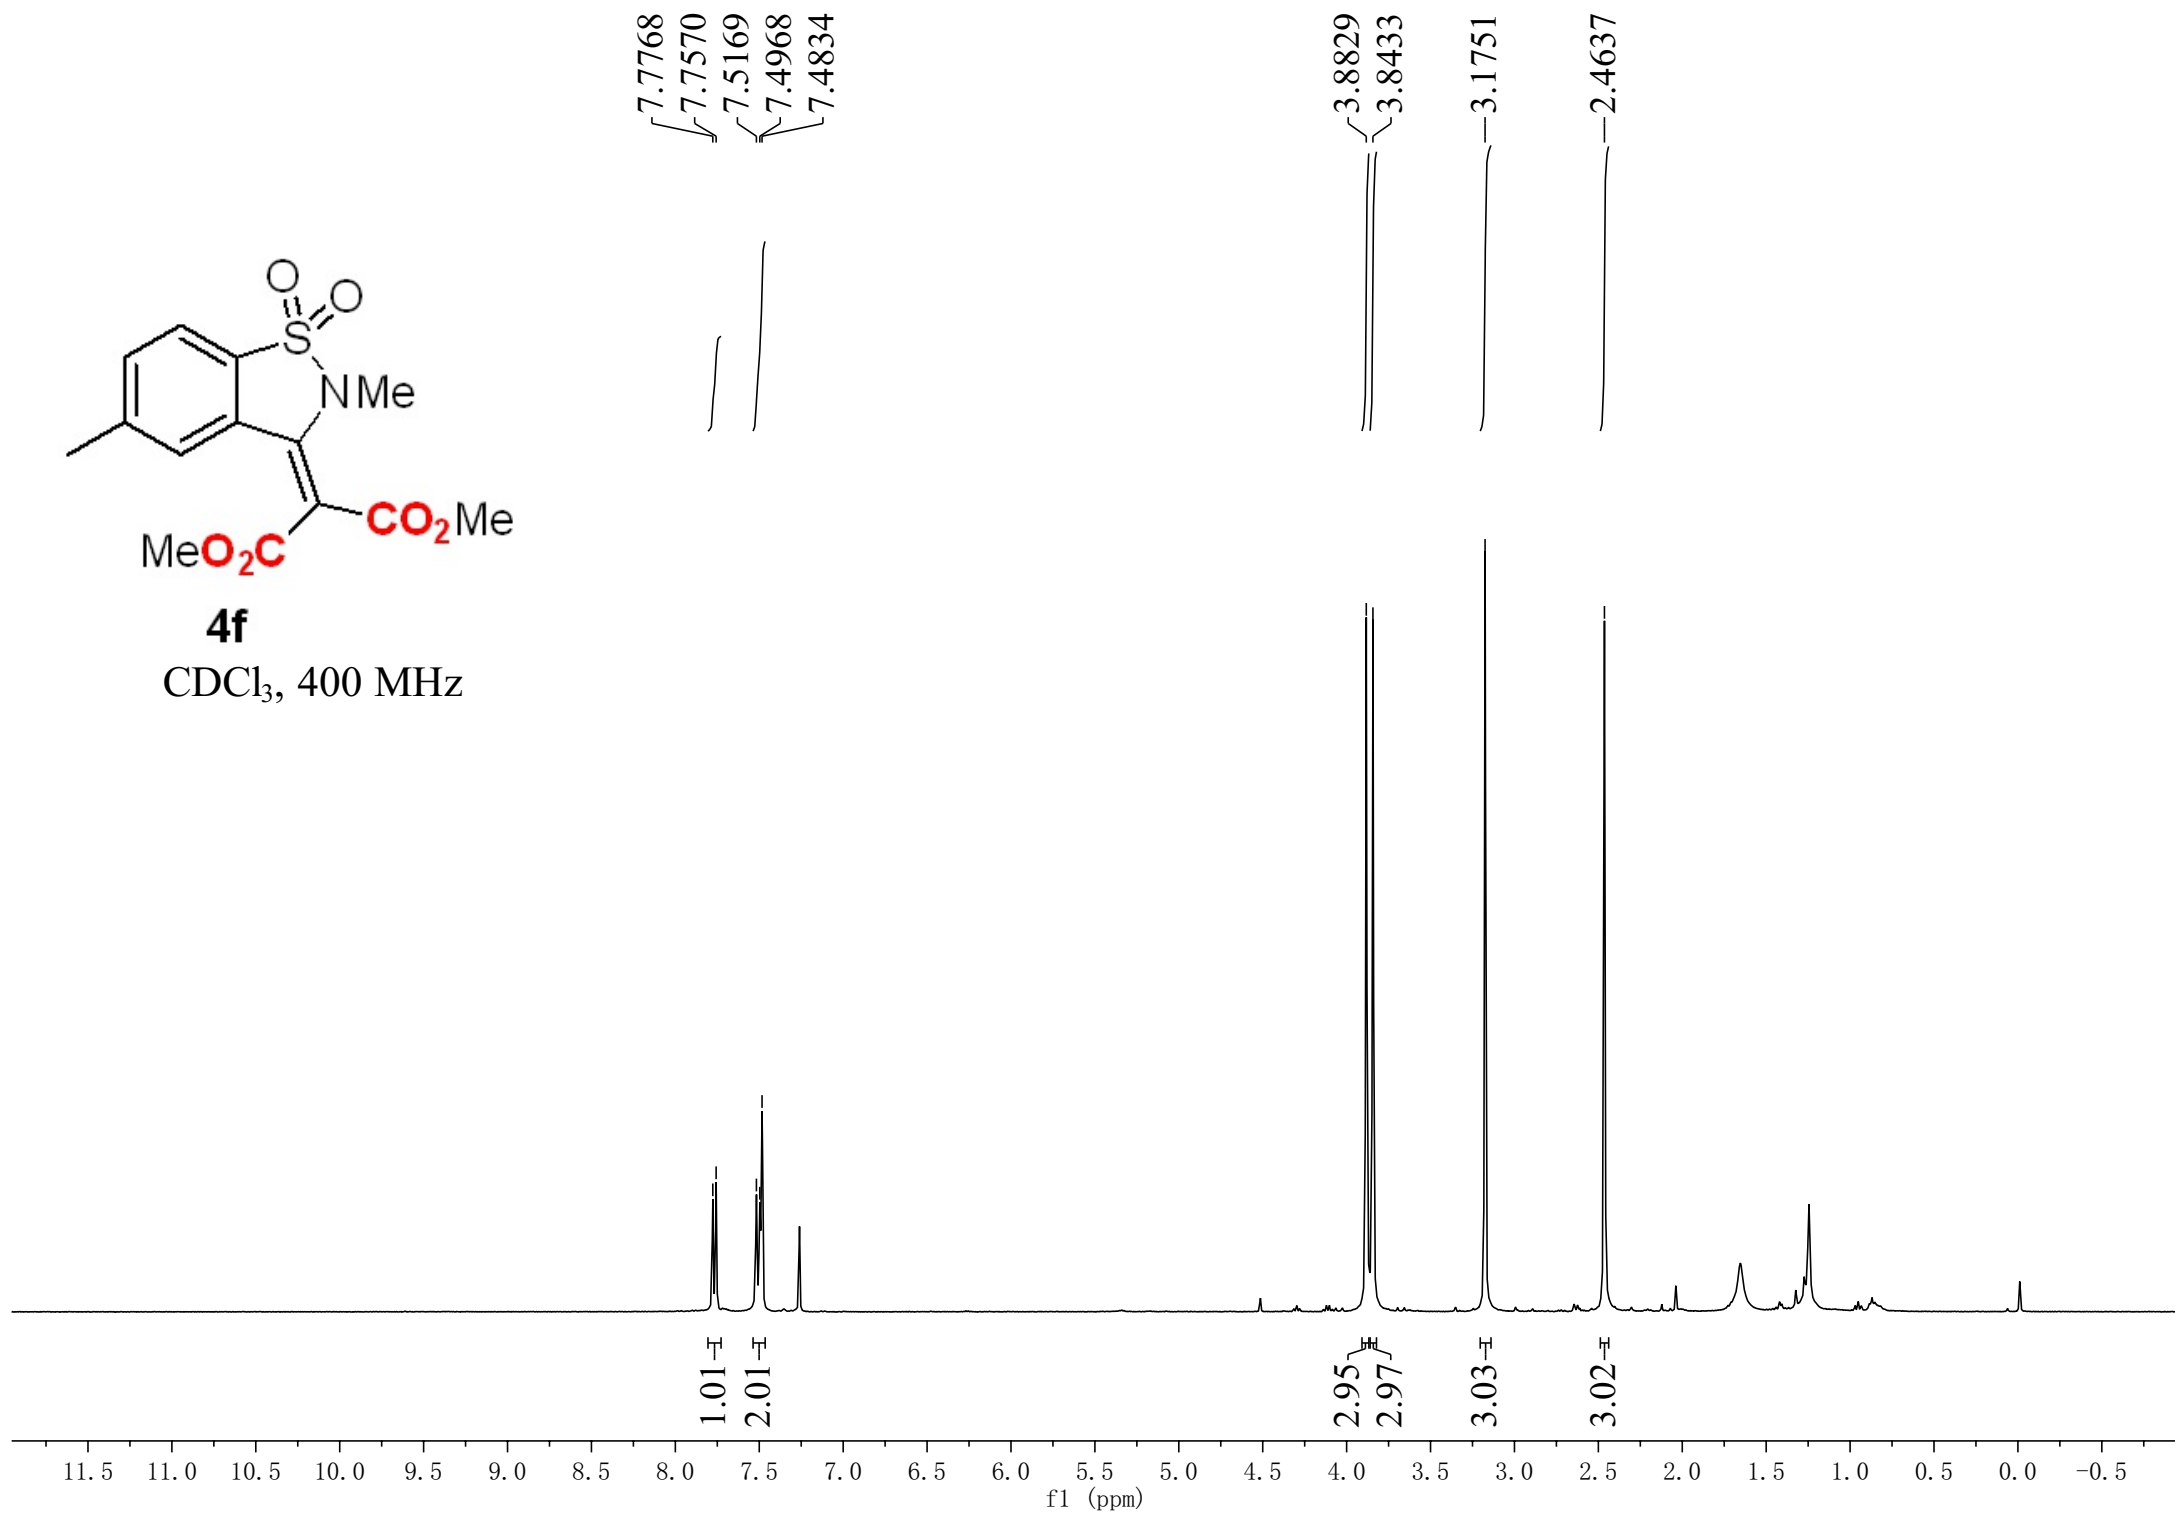

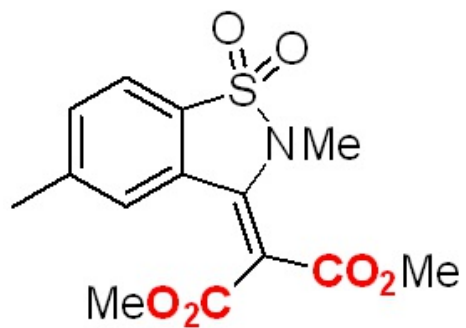

**4f**

CDCl<sub>3</sub>, 101 MHz

~166.86  
~164.36

~145.63  
~144.76  
~133.49  
~129.49  
~128.49  
~126.20  
~121.42

-101.44

{77.32  
77.00  
76.68

{53.10  
52.77

-30.78

-22.16

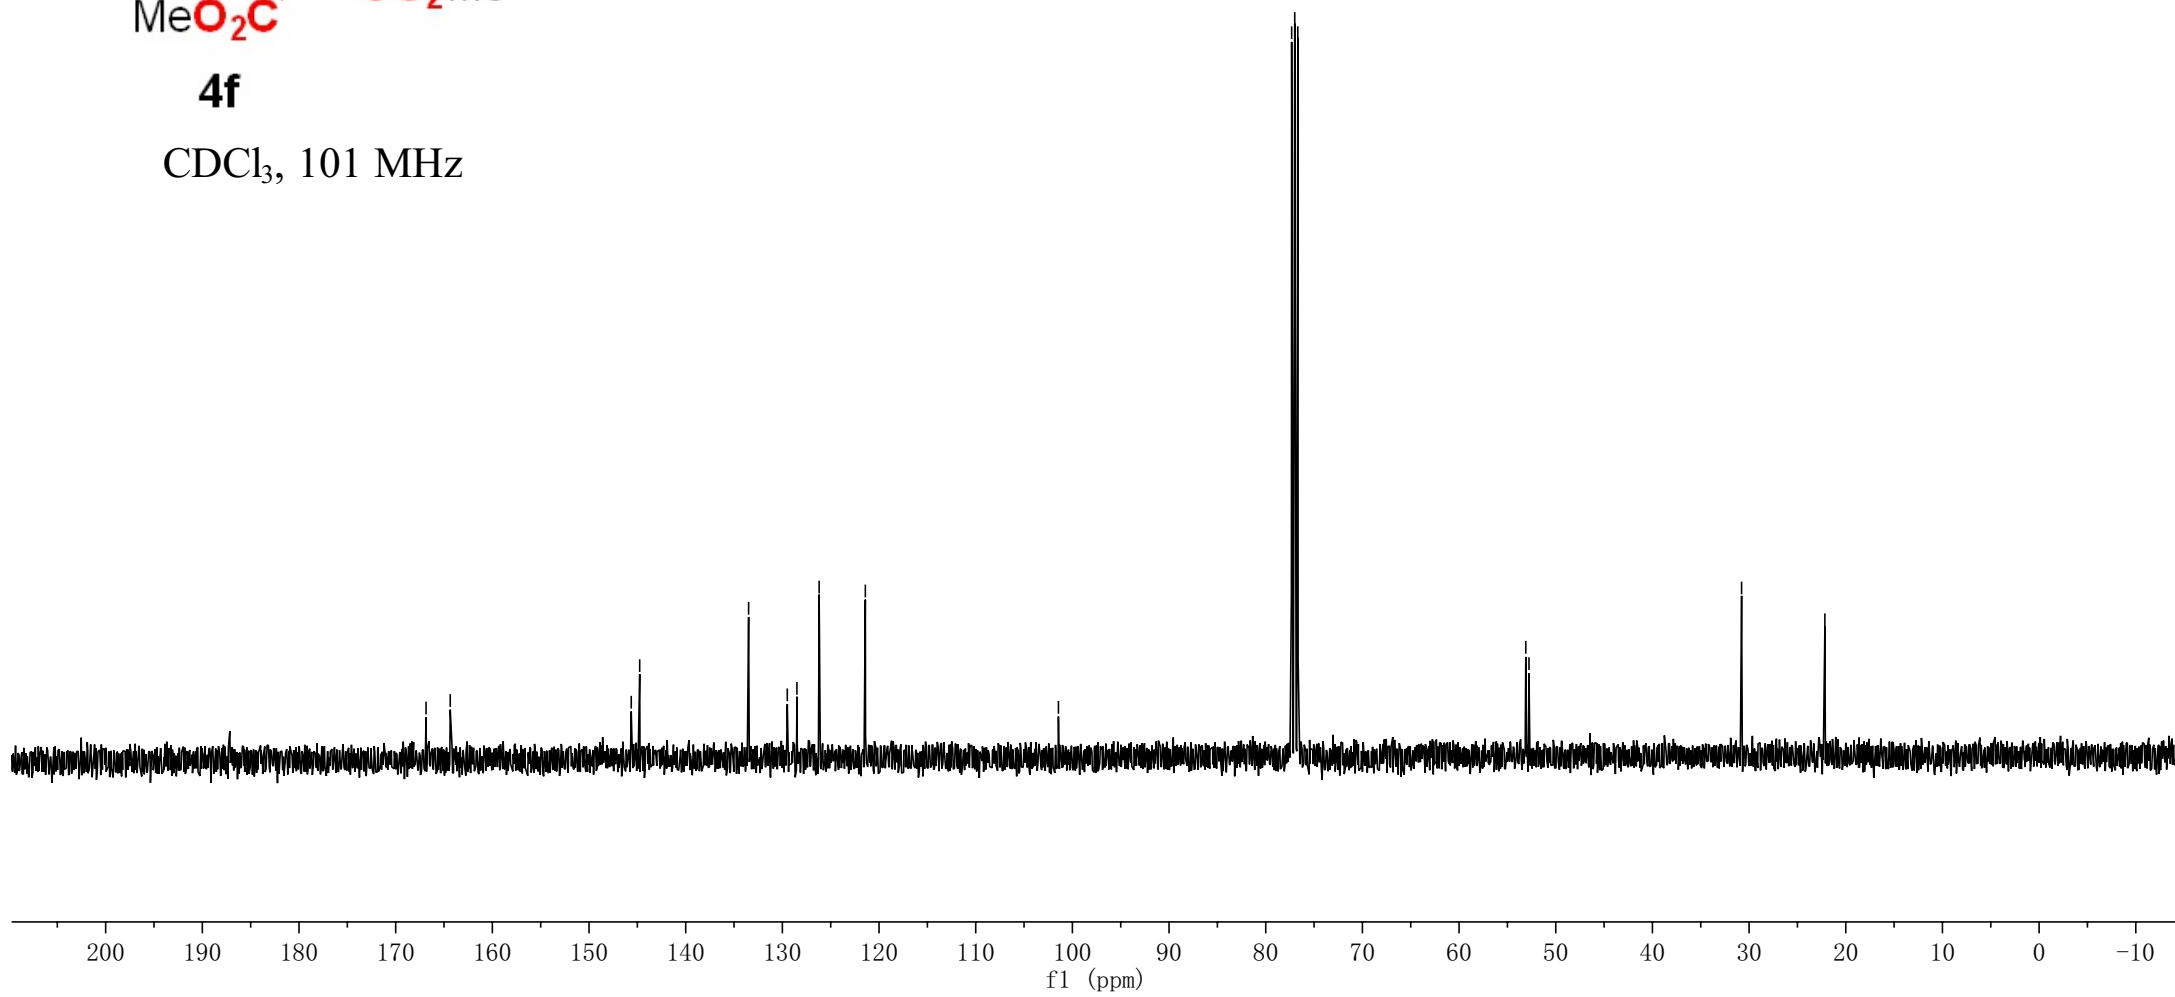

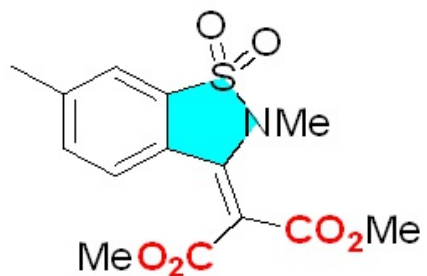

**4g**

CDCl<sub>3</sub>, 400 MHz

7.6878  
7.6858  
7.6839  
7.6818  
7.6799  
7.6278  
7.6069  
7.4699  
7.4679  
7.4657  
7.4637  
7.4488  
7.4468  
7.4447  
7.4428  
7.2606

3.8792  
3.8460  
3.1843  
2.5084

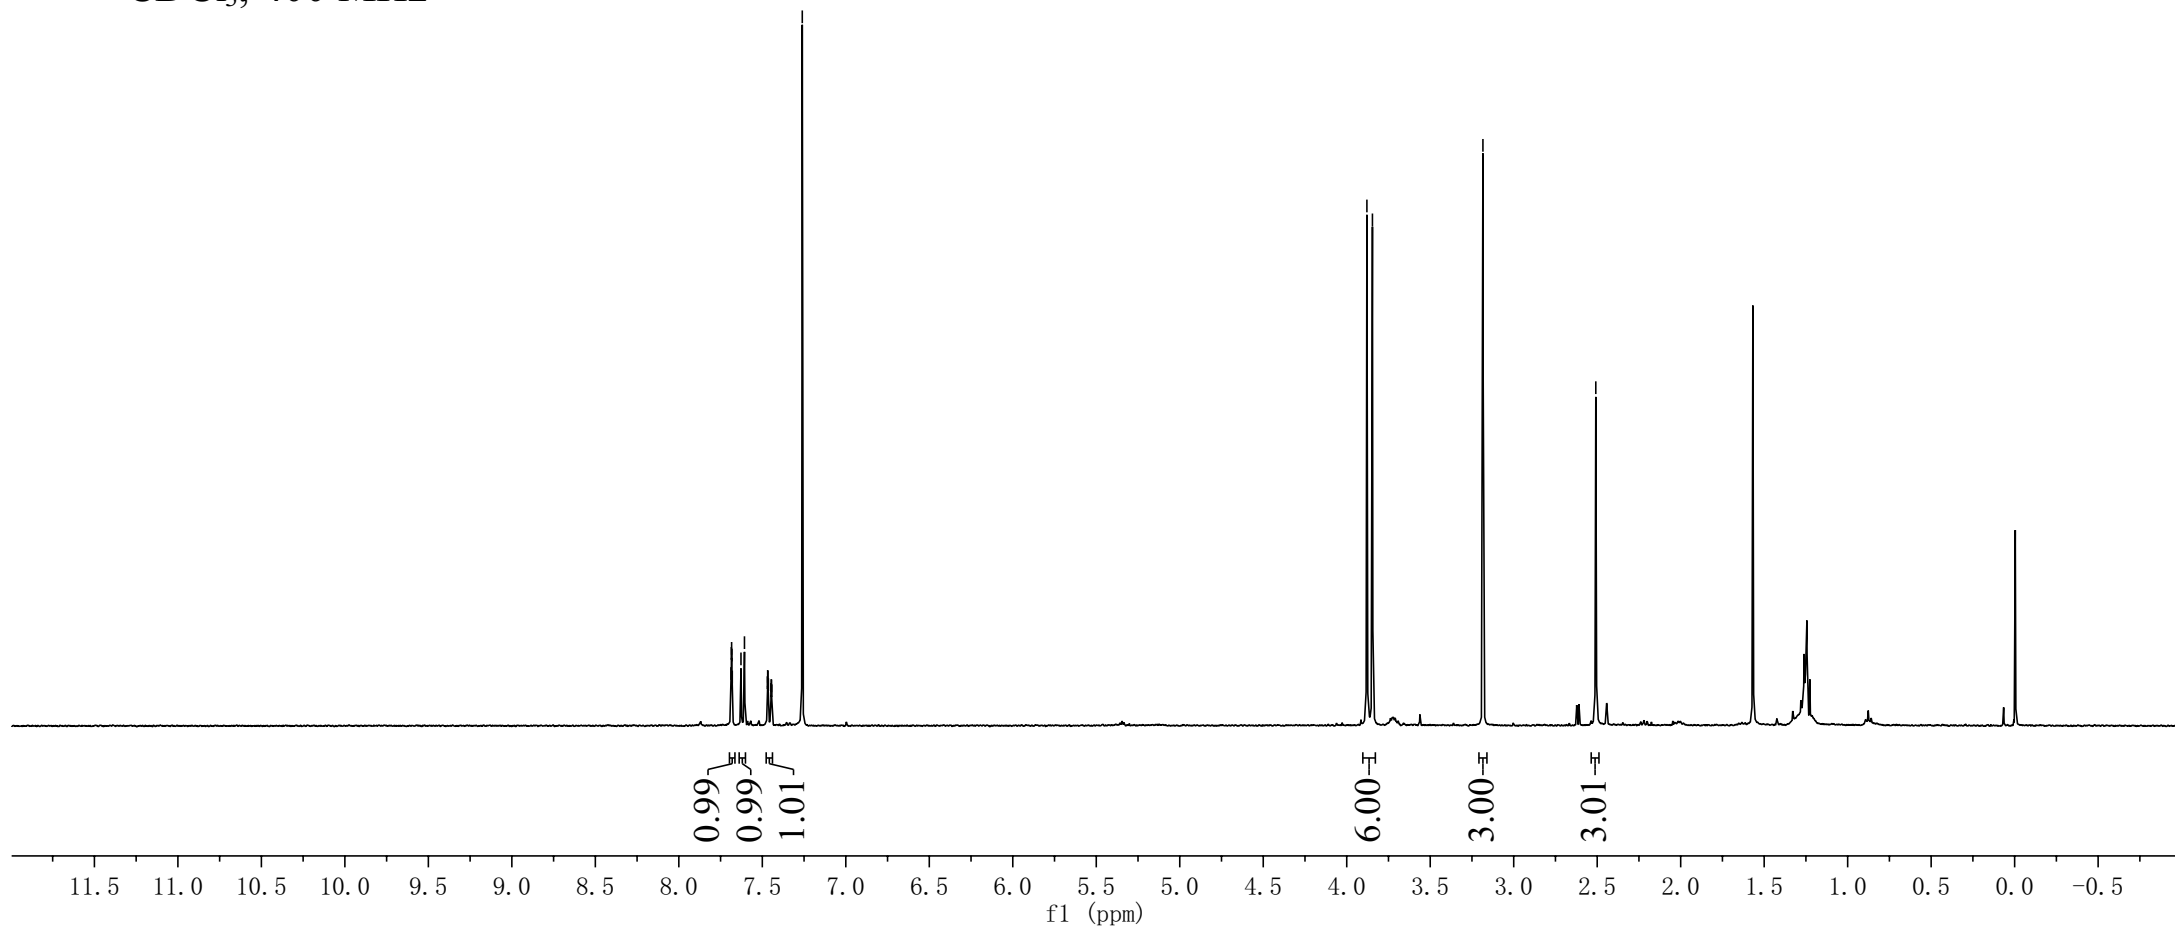

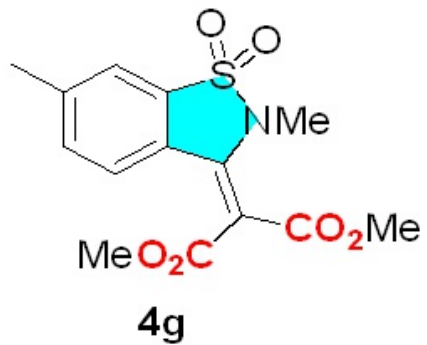

CDCl<sub>3</sub>, 101 MHz

~166.87  
~164.48

~145.73  
~144.23  
~134.64  
~132.28  
~125.78  
~125.60  
~121.69

-101.15

{77.32  
77.00  
76.68

{53.09  
52.73

-30.70

-21.54

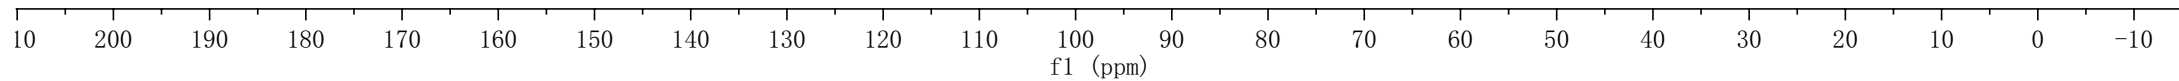

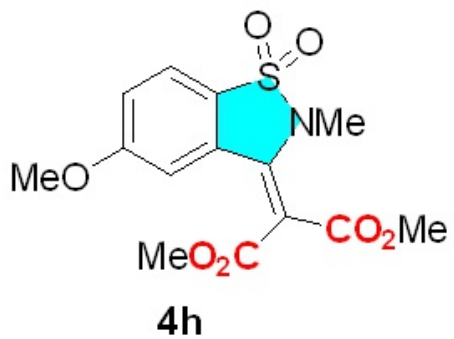

CDCl<sub>3</sub>, 400 MHz

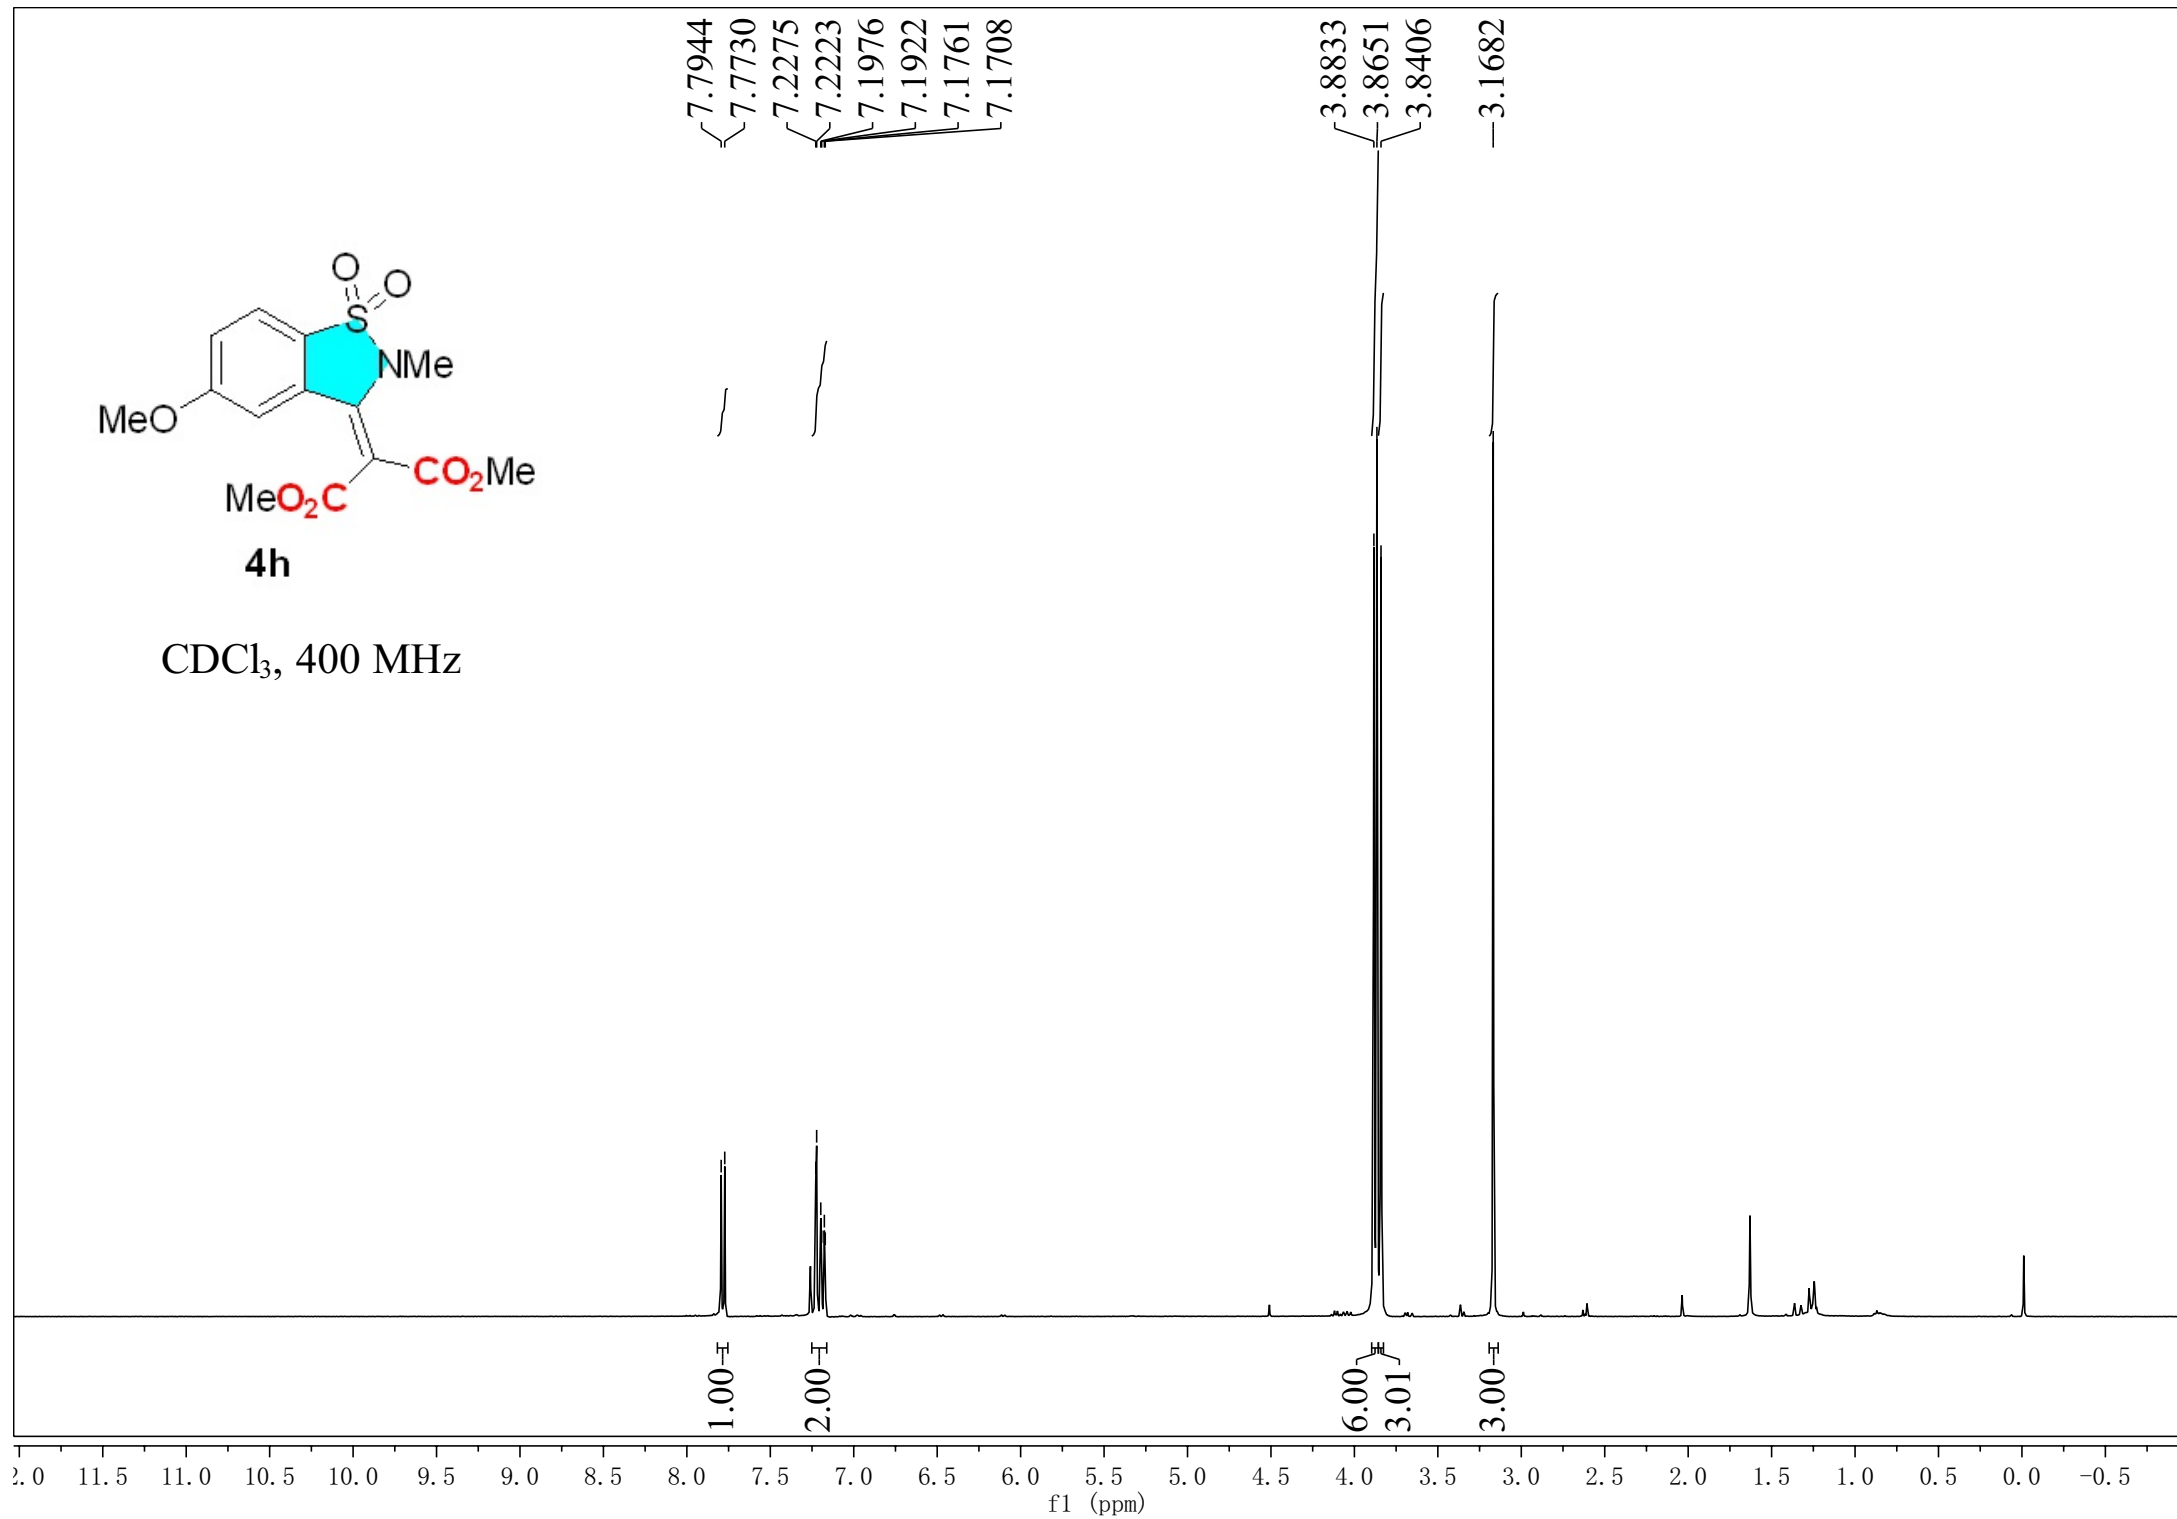

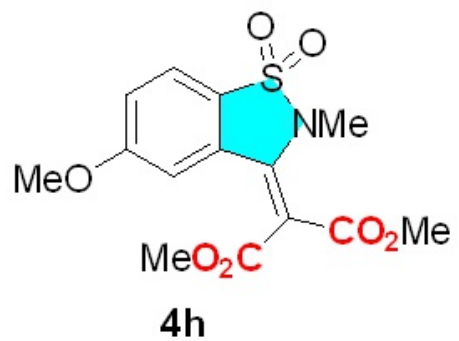

CDCl<sub>3</sub>, 101 MHz

166.83  
164.38  
163.71

145.36

130.52

124.16

123.10

118.77

110.88

101.72

55.99

53.19

52.82

30.88

10 200 190 180 170 160 150 140 130 120 110 100 90 80 70 60 50 40 30 20 10 0 -10

f1 (ppm)

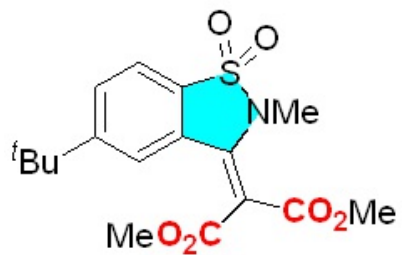

**4i**

CDCl<sub>3</sub>, 400 MHz

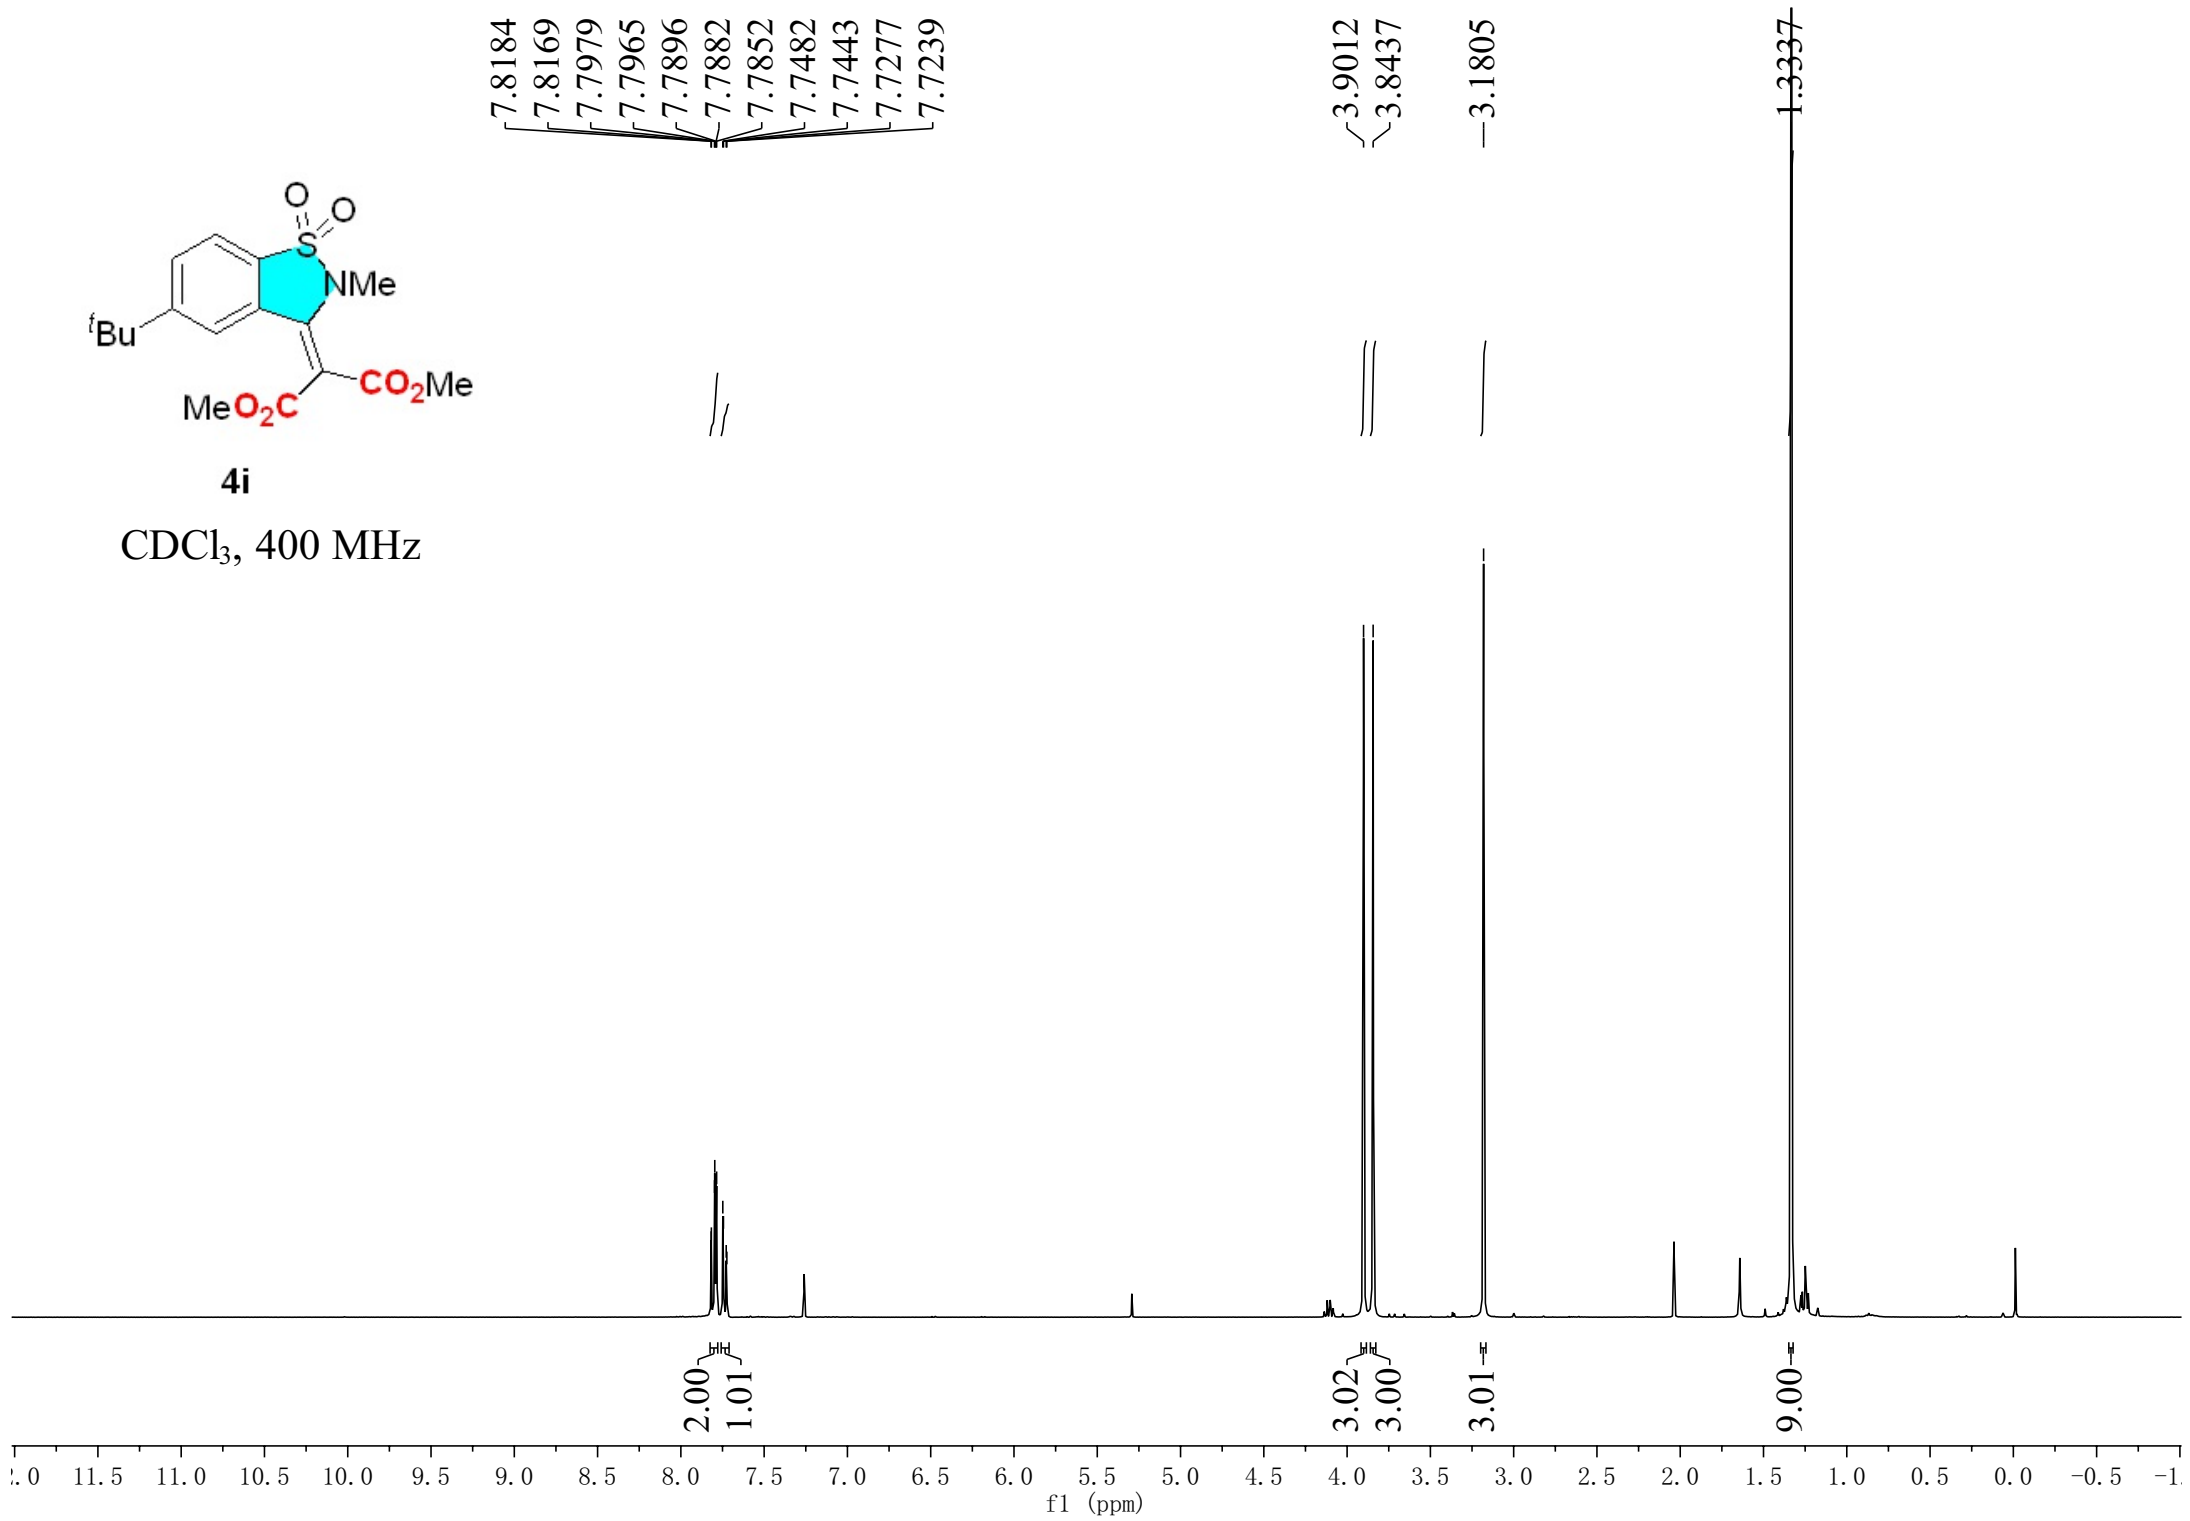





4i

CDCl<sub>3</sub>, 101 MHz

166.97  
164.30  
157.82  
145.86  
130.26  
129.32  
128.24  
122.78  
121.22  
101.23  
77.32  
77.00  
76.68  
53.10  
52.69  
35.67  
30.96  
30.82

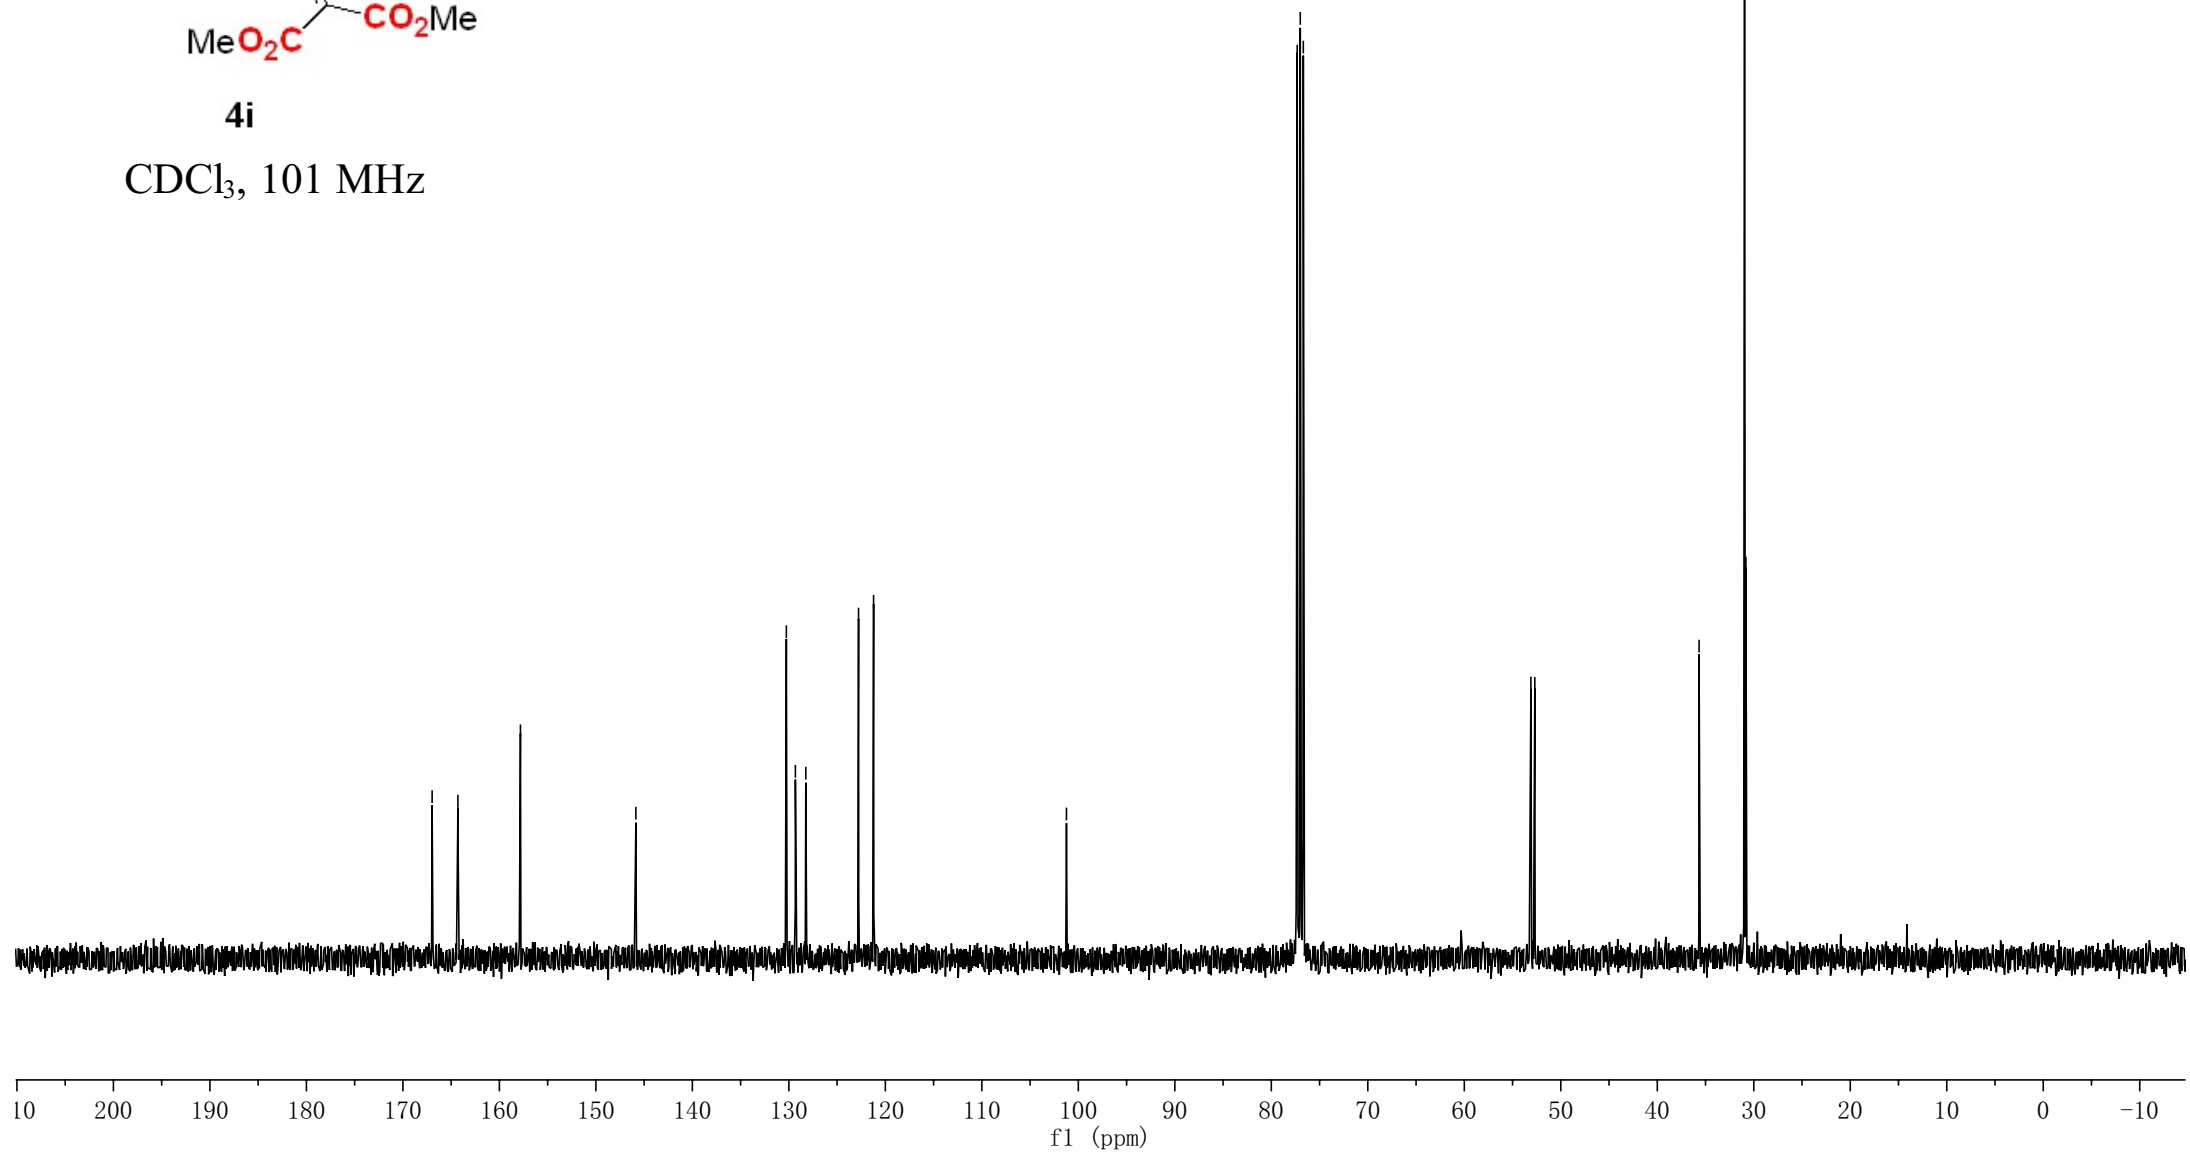

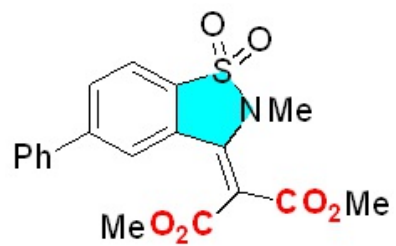

4j

CDCl<sub>3</sub>, 400 MHz

7.9525  
7.9324  
7.8961  
7.8921  
7.8784  
7.8758  
7.8728  
7.5485  
7.5435  
7.5305  
7.5275  
7.5241  
7.5177  
7.5152  
7.4999  
7.4812  
7.4729  
7.4688  
7.4527  
7.2600  
  
3.8827  
3.8637  
-3.2212

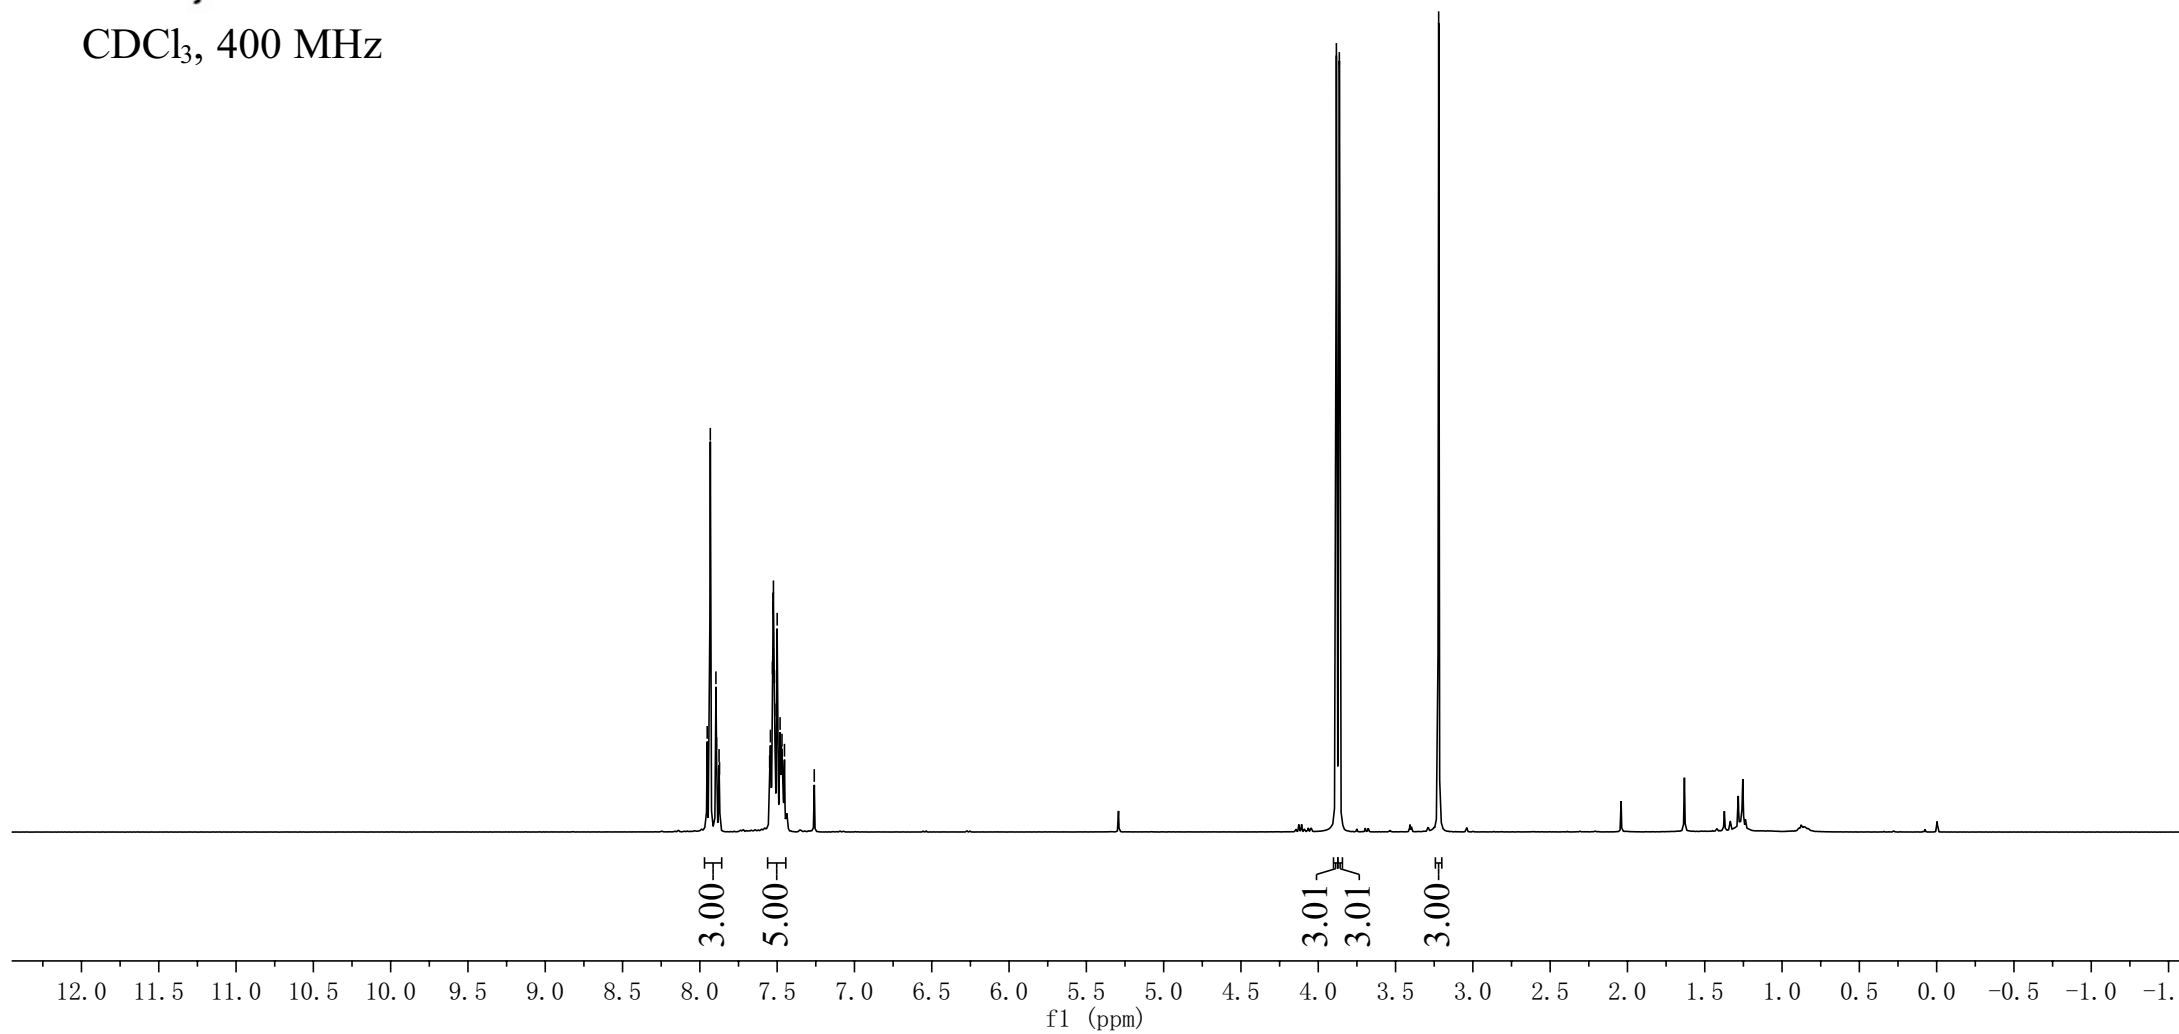

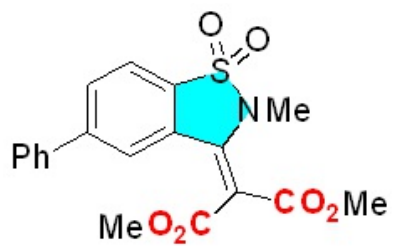

4j

CDCl<sub>3</sub>, 101 MHz

166.83  
164.28  
147.10  
145.22  
138.68  
131.49  
130.52  
129.30  
129.05  
128.88  
127.28  
124.66  
121.92

-101.92

77.32  
77.00  
76.68

53.21  
52.80

-30.83

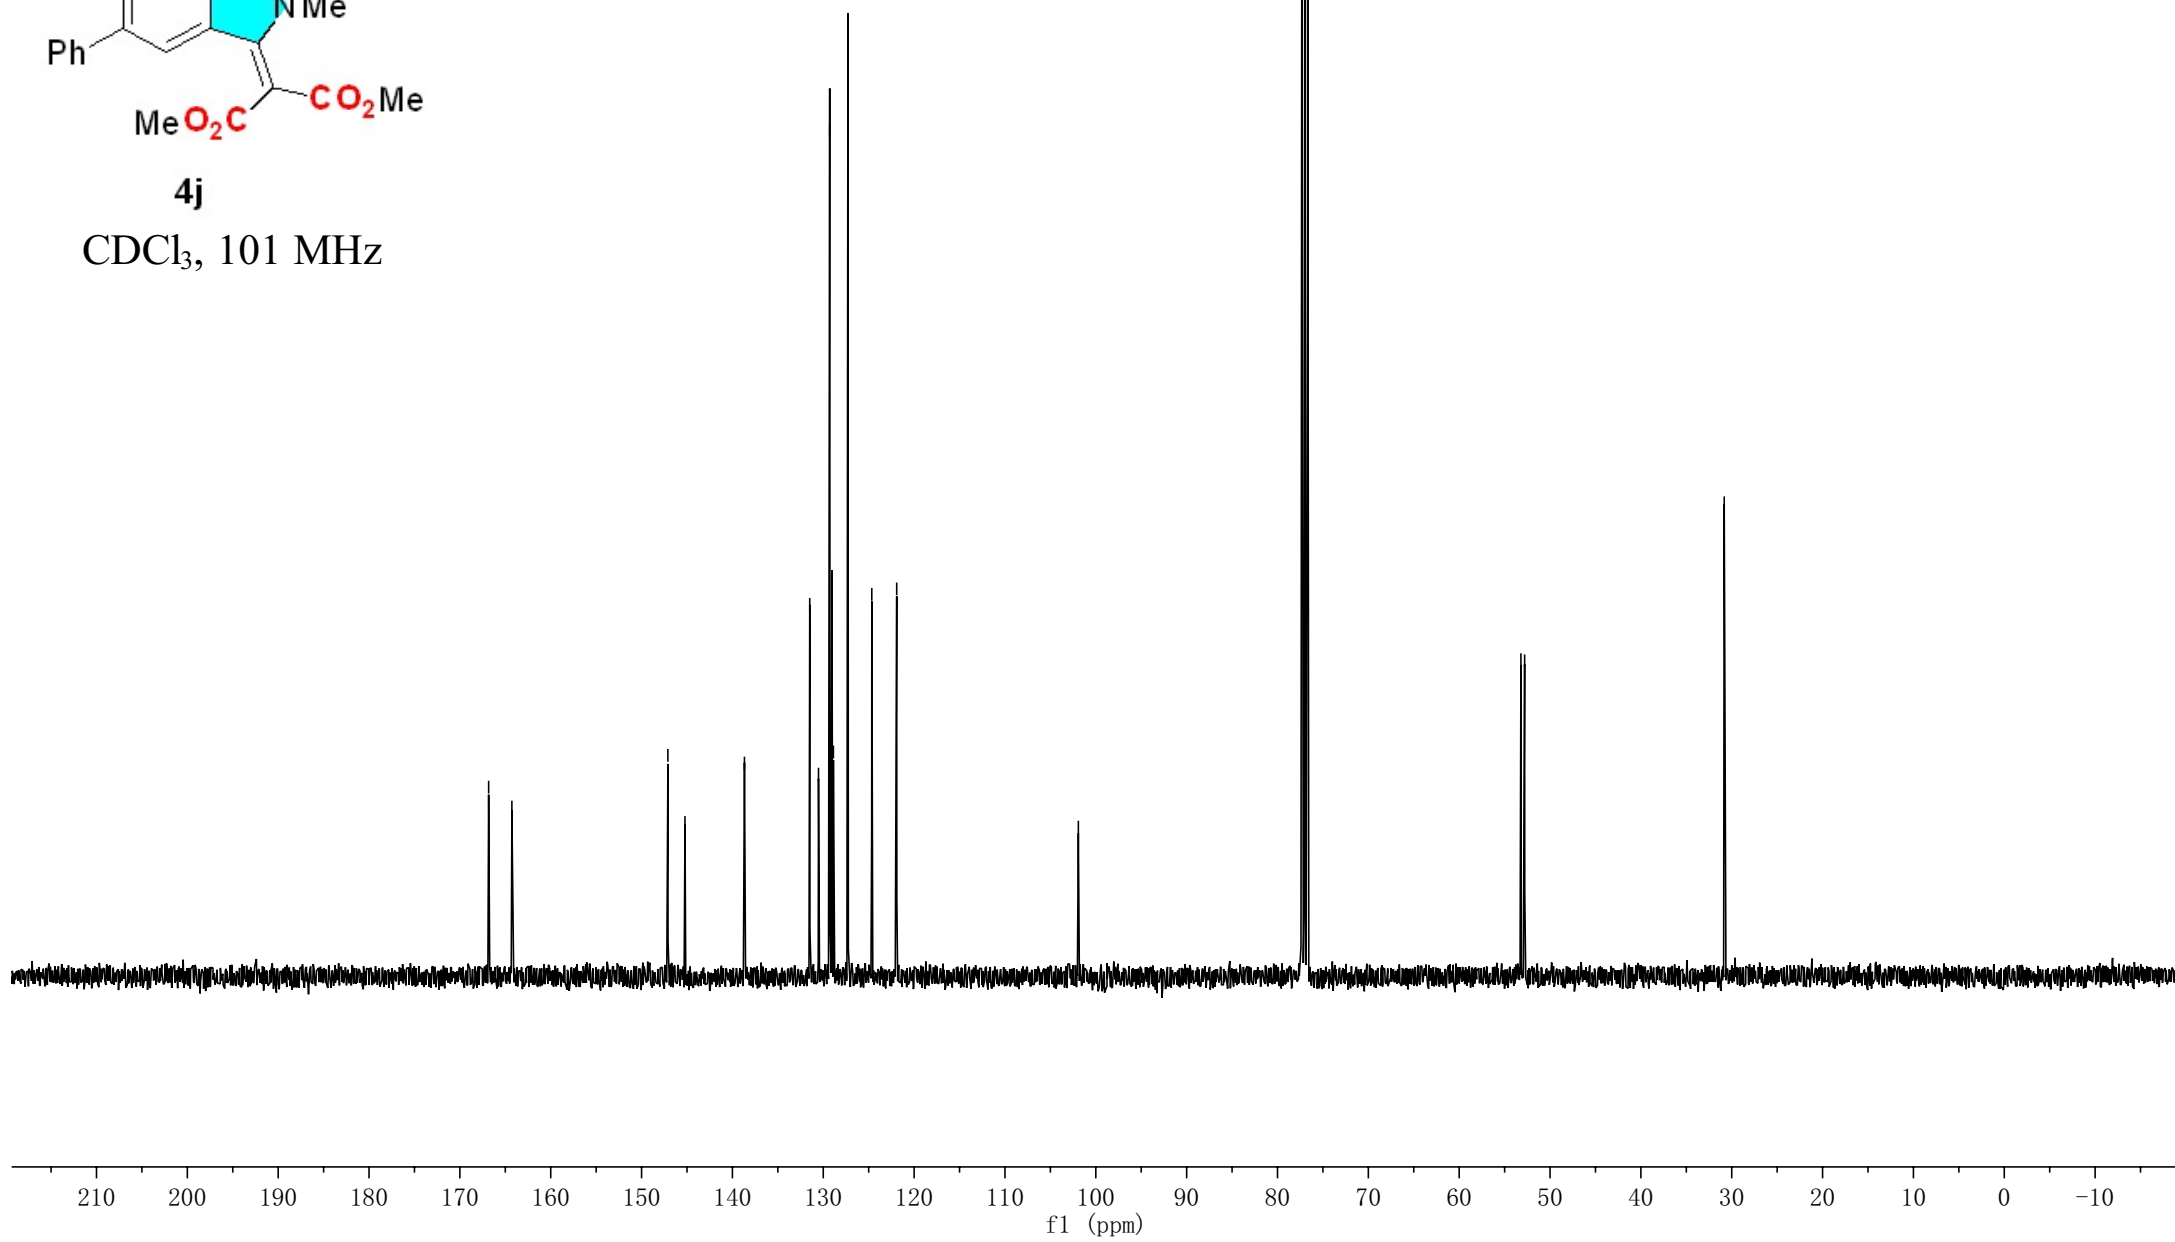

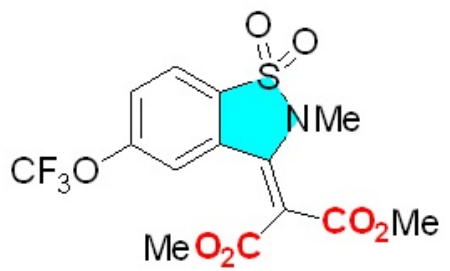

4k

CDCl<sub>3</sub>, 400 MHz

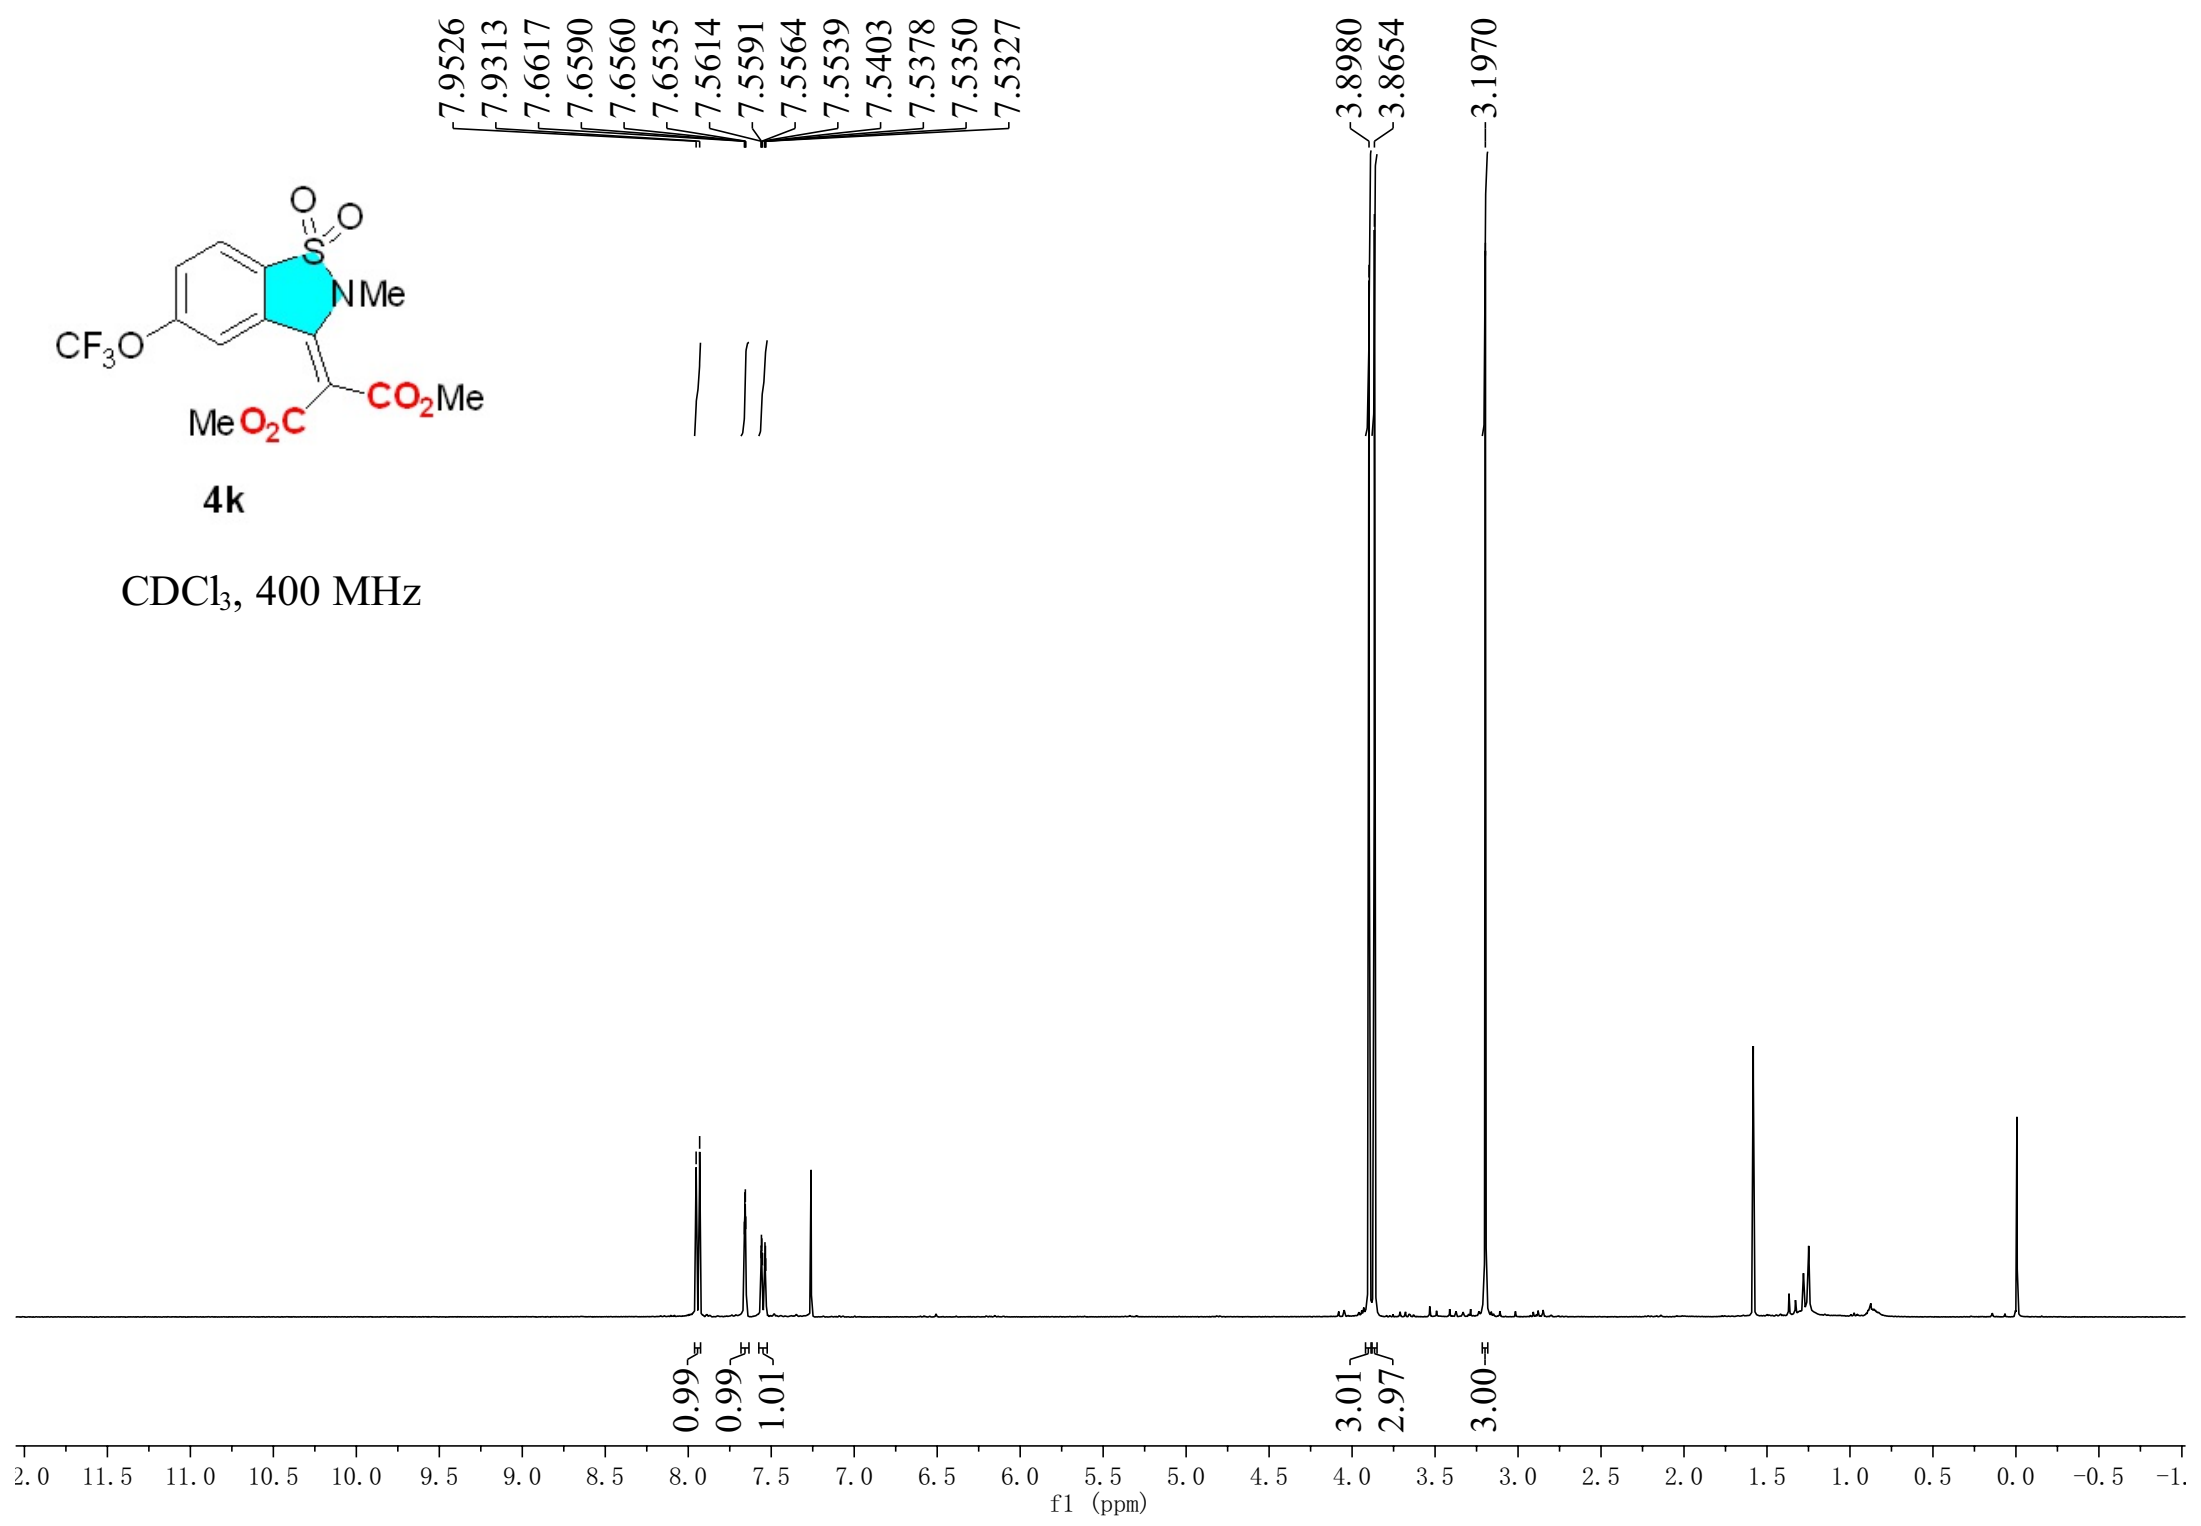

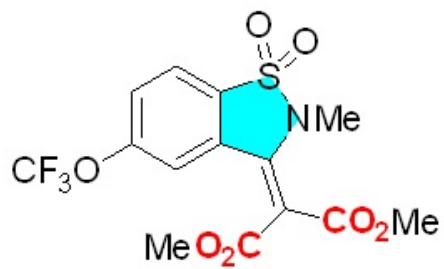

4k

$\text{CDCl}_3$ , 101 MHz

~166.18  
~164.07  
-152.76  
-143.50  
130.76  
130.19  
124.88  
123.52  
~121.41  
118.82  
118.32  
-103.35

77.37  
77.05  
76.74

53.35  
53.08

-30.88

200 190 180 170 160 150 140 130 120 110 100 90 80 70 60 50 40 30 20 10 0 -10  
f1 (ppm)

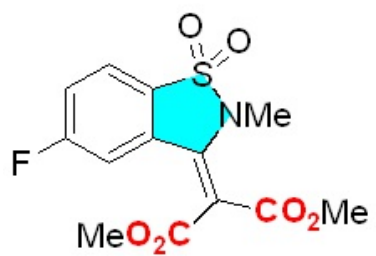

4I

CDCl<sub>3</sub>, 400 MHz

7.9052  
7.8930  
7.8838  
7.8716  
7.5118  
7.5063  
7.4878  
7.4825  
7.4355  
7.4301  
7.4160  
7.4142  
7.4106  
7.4088  
7.3947  
7.3892

3.9039  
3.8526

3.1784

11.5 11.0 10.5 10.0 9.5 9.0 8.5 8.0 7.5 7.0 6.5 6.0 5.5 5.0 4.5 4.0 3.5 3.0 2.5 2.0 1.5 1.0 0.5 0.0 -0.5 -1

0.99

1.00

1.01

3.07

3.08

3.00

f1 (ppm)

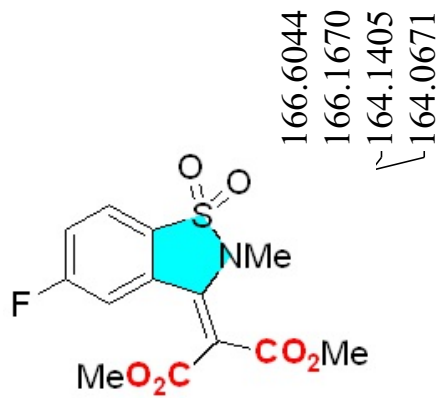

4I

CDCl<sub>3</sub>, 101 MHz

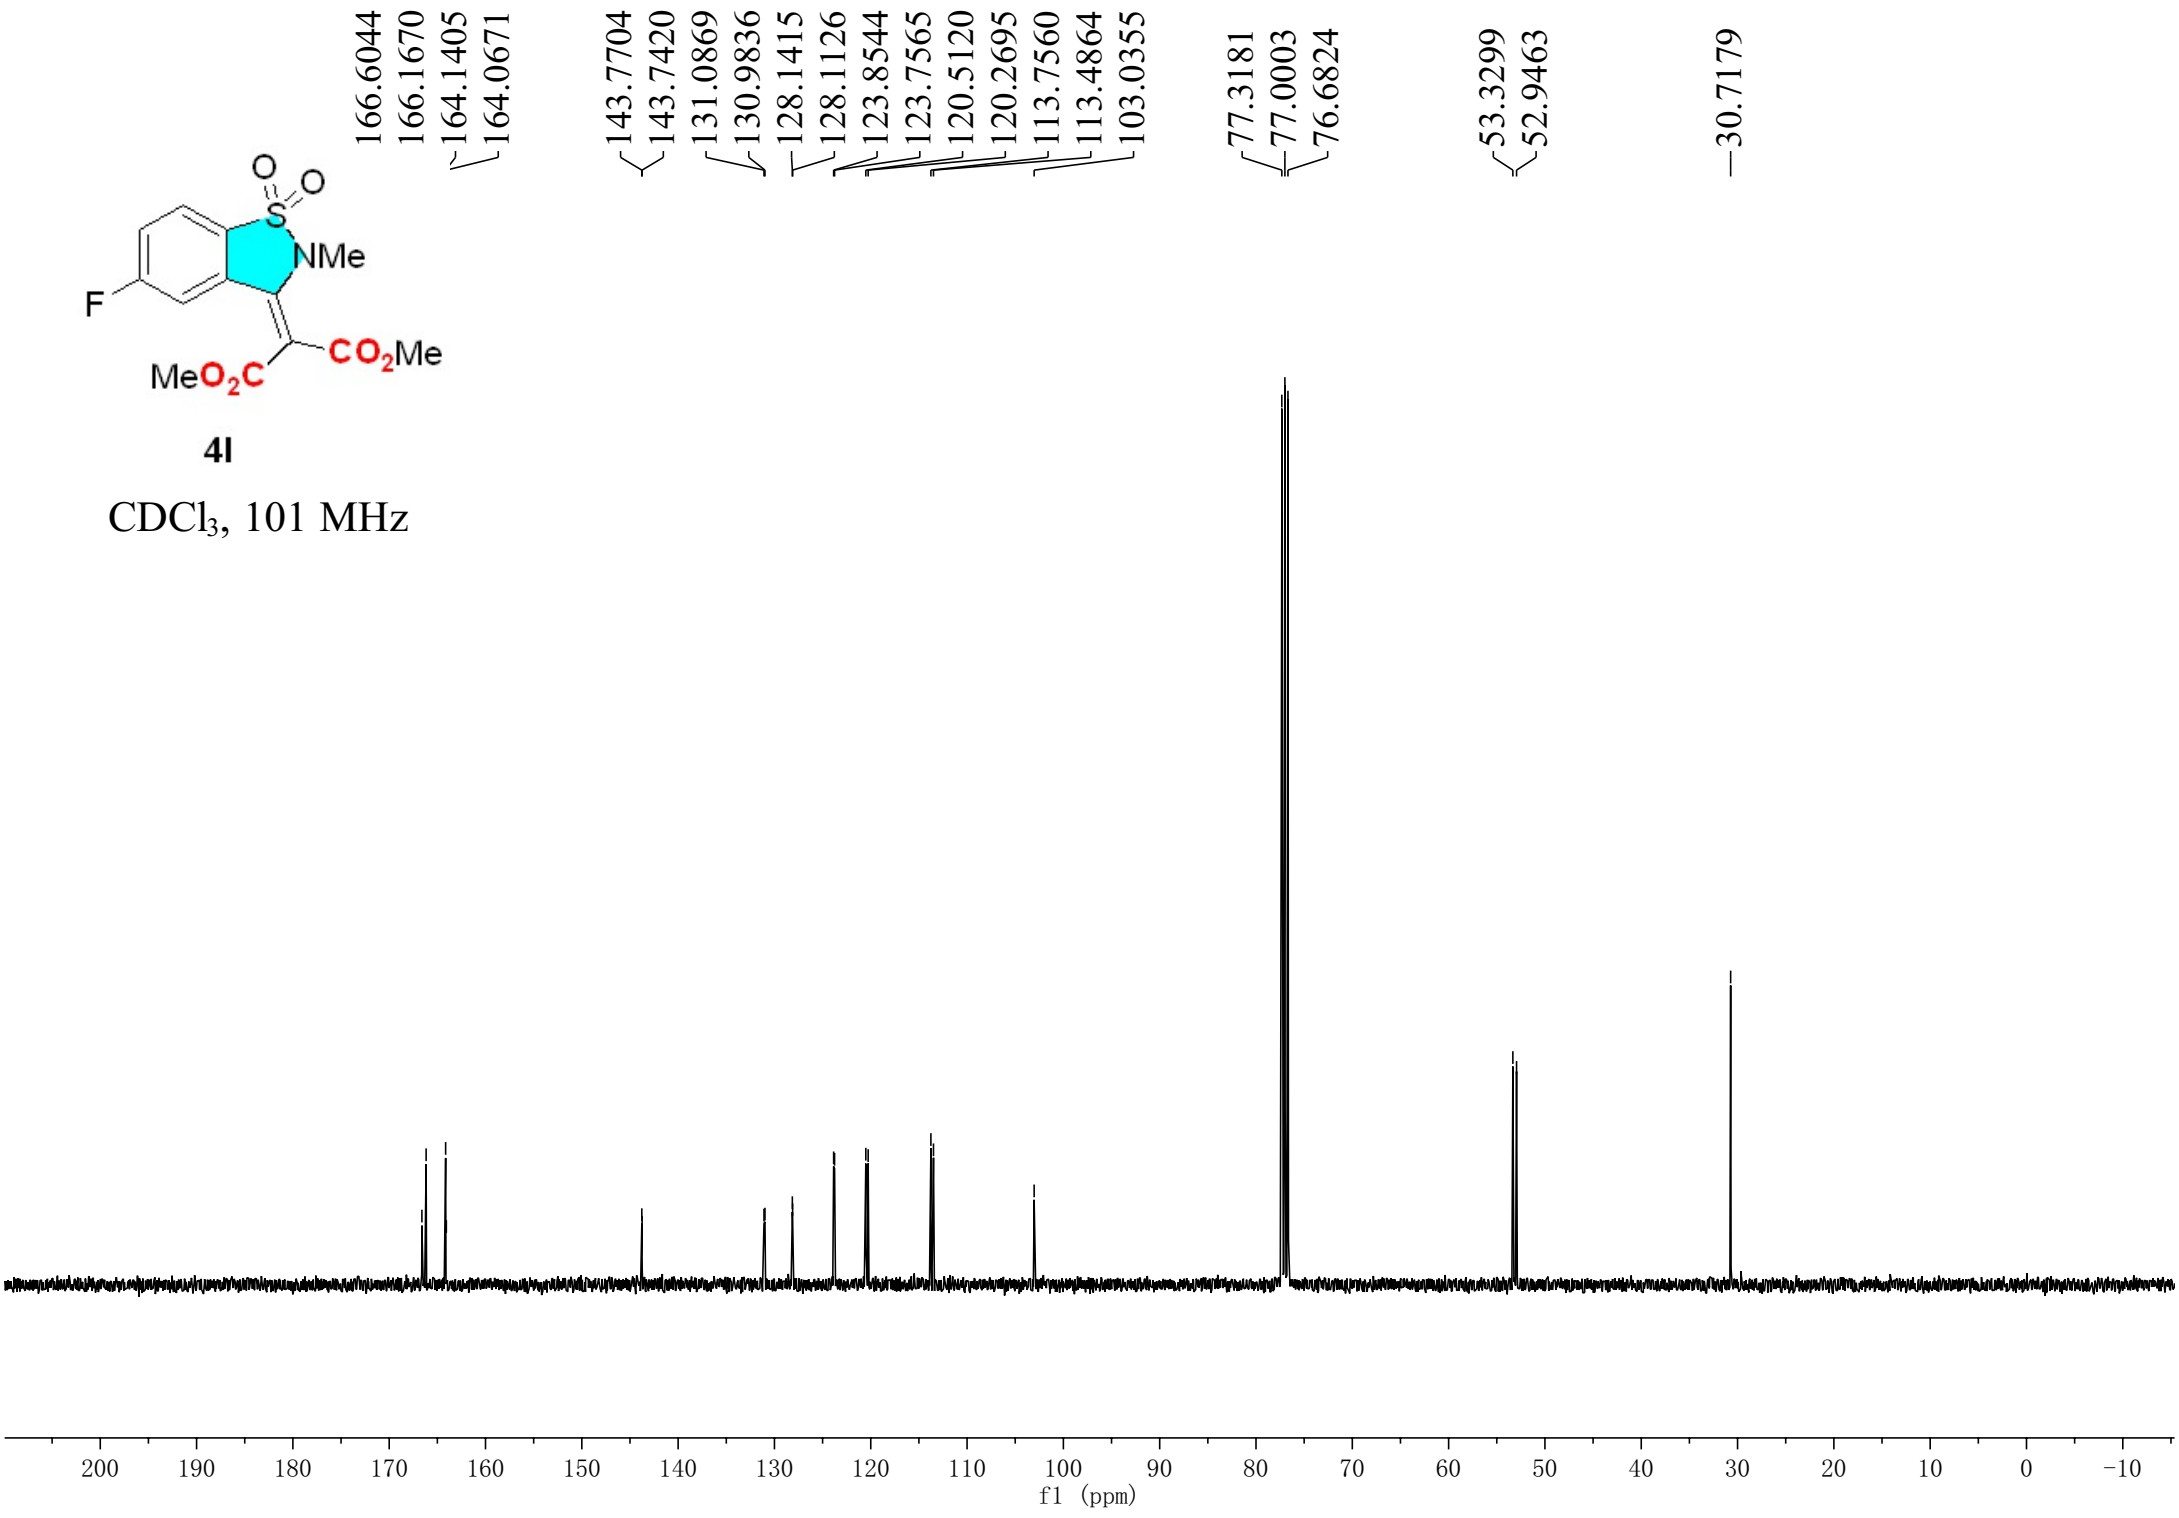

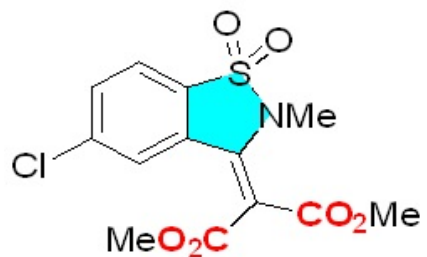

4m

CDCl<sub>3</sub>, 400 MHz

7.8330  
7.8124  
7.7412  
7.7372  
7.6868  
7.6826  
7.6661  
7.6619

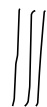

3.9057  
3.8525  
3.1764

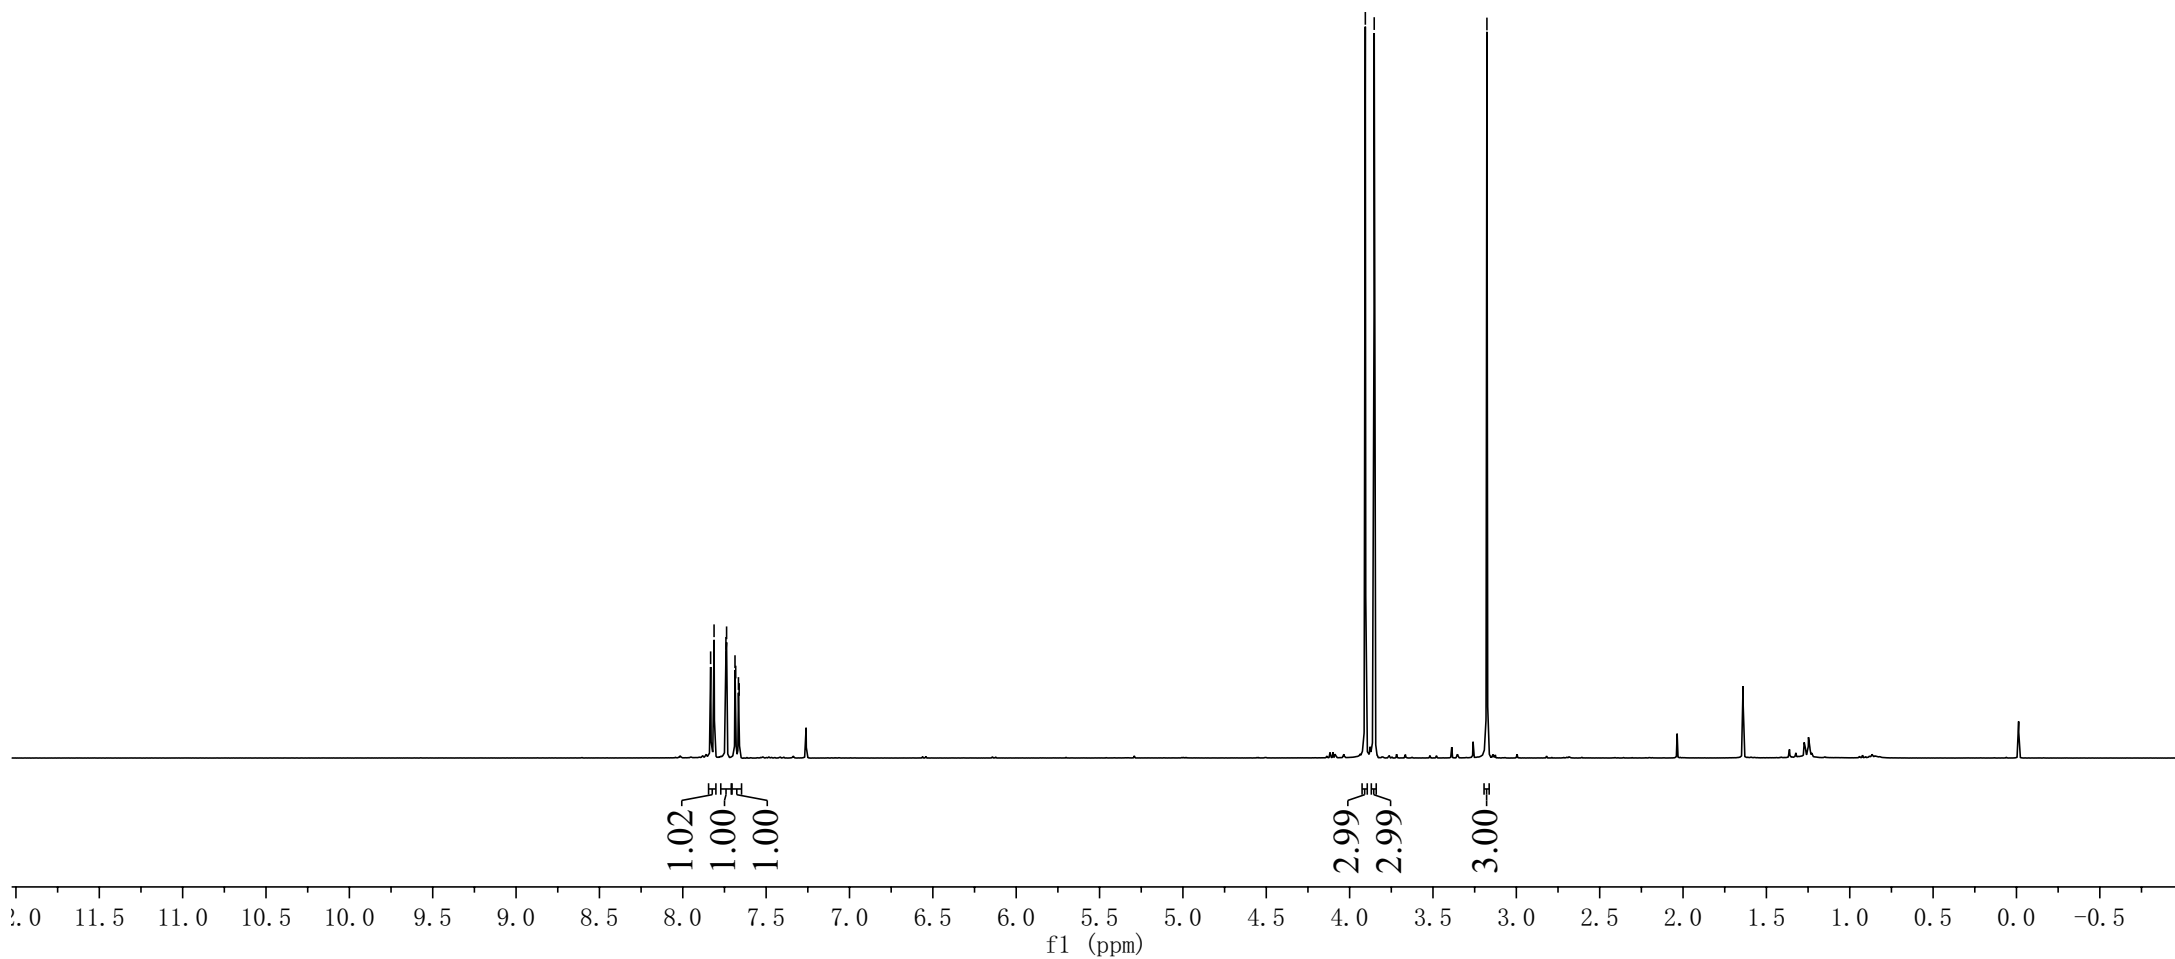



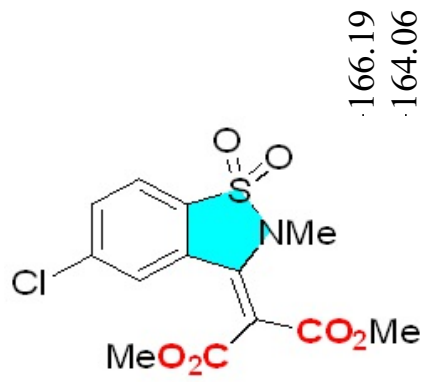

4m

CDCl<sub>3</sub>, 101 MHz

166.19  
164.06

143.71  
140.35  
132.76  
130.37  
129.96  
126.30  
122.68

102.95

77.32  
77.00  
76.68

53.31  
52.94

30.74

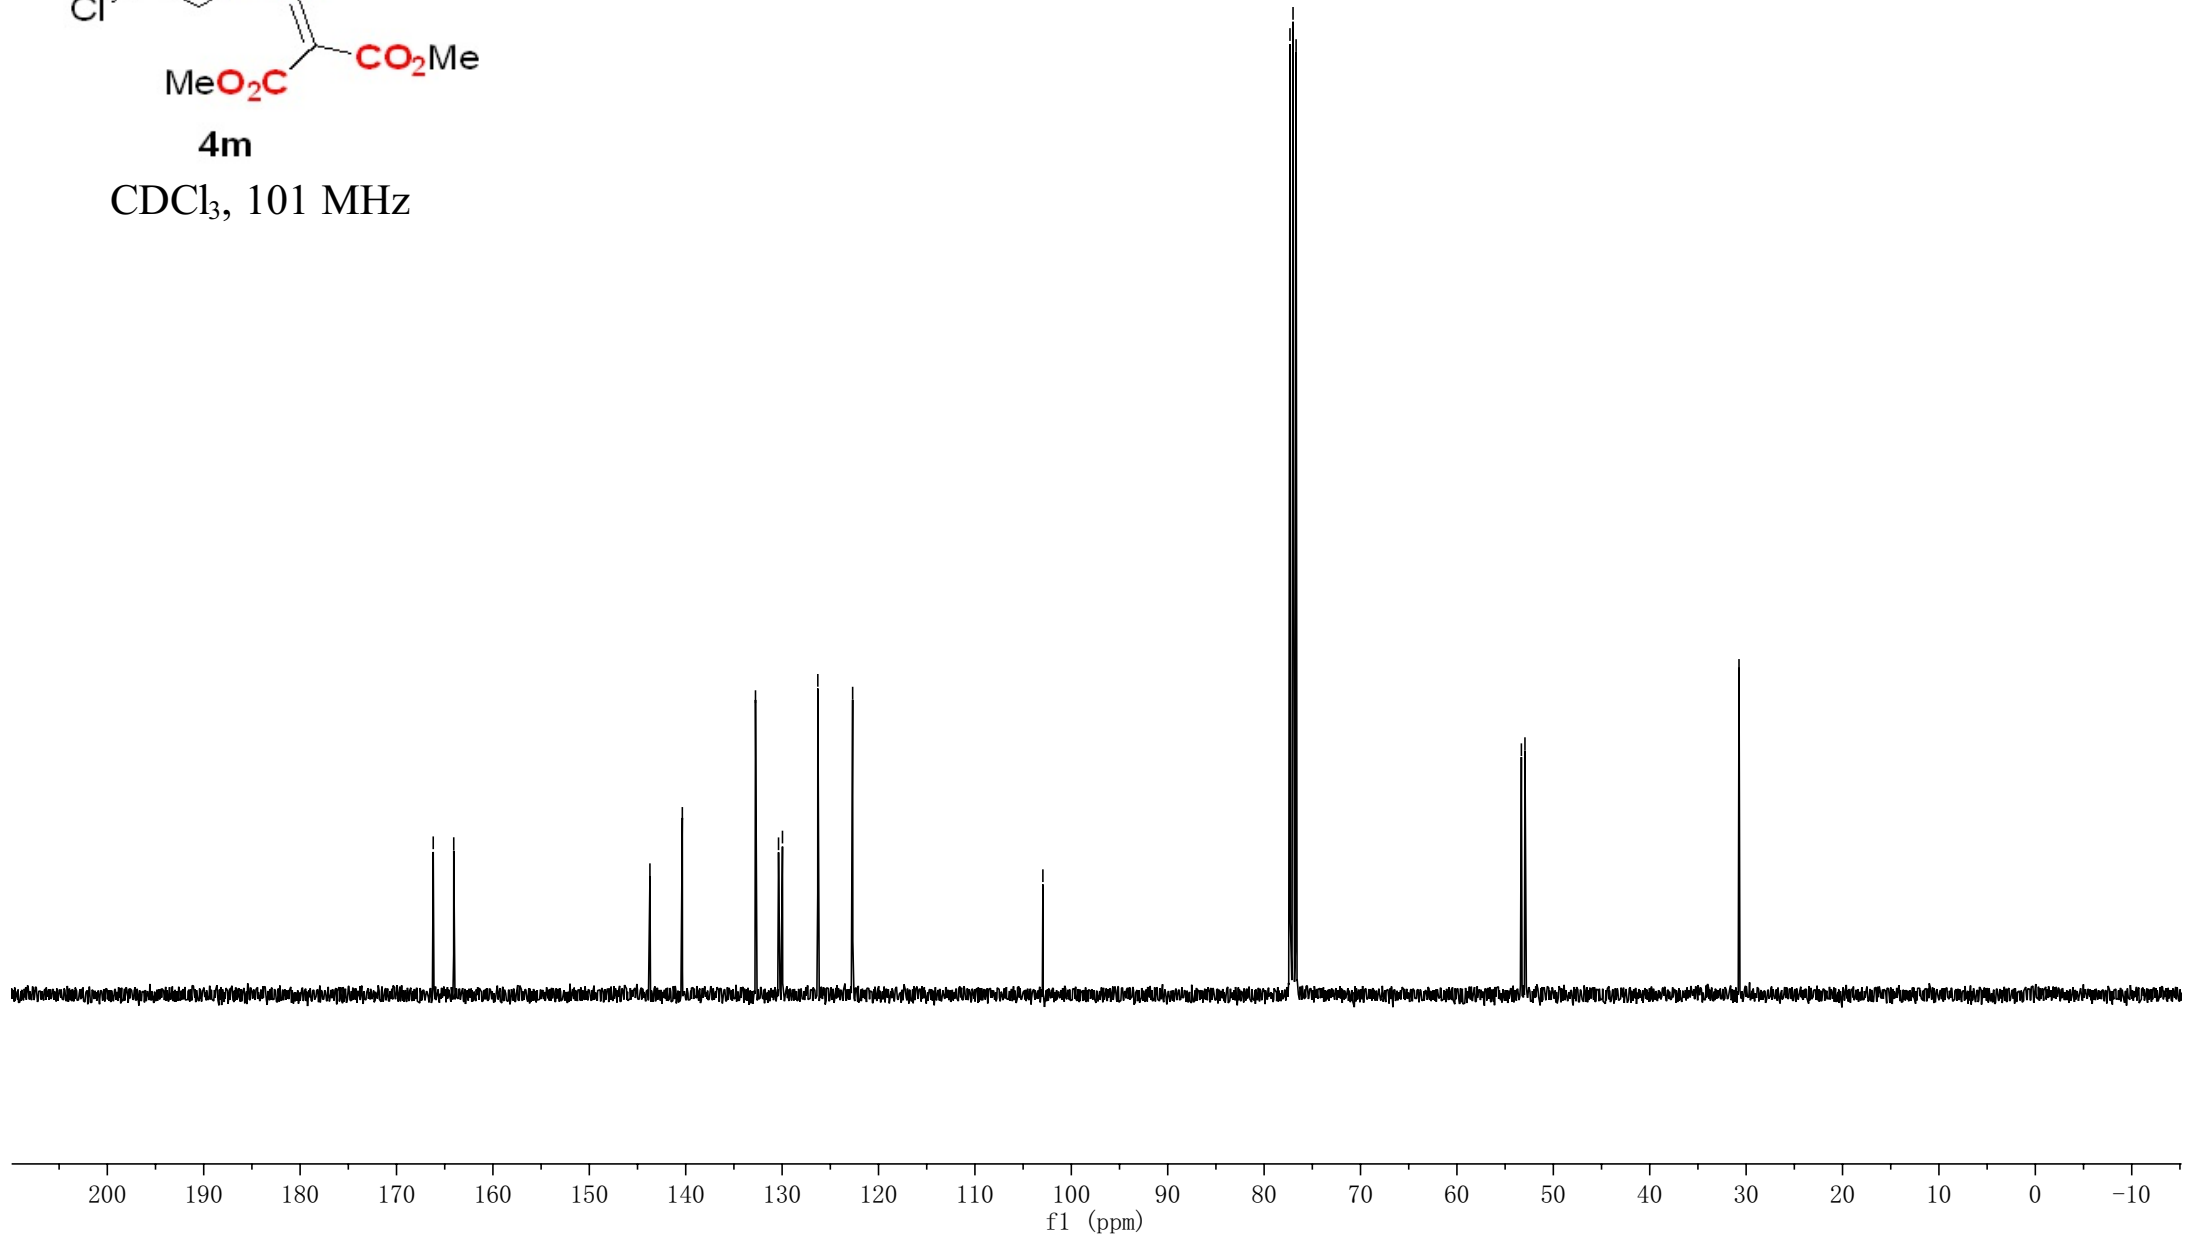

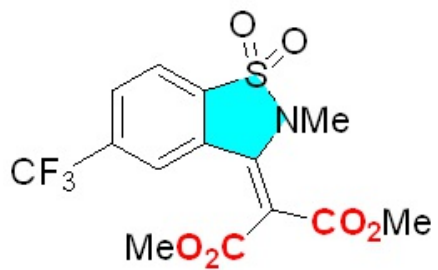

4n

CDCl<sub>3</sub>, 400 MHz

8.0465  
8.0440  
8.0424  
8.0406  
8.0289  
8.0270  
8.0251  
7.9781  
7.9762  
7.9734  
7.9583  
7.9561  
7.9543  
7.9527

3.9043  
3.8706  
3.2146

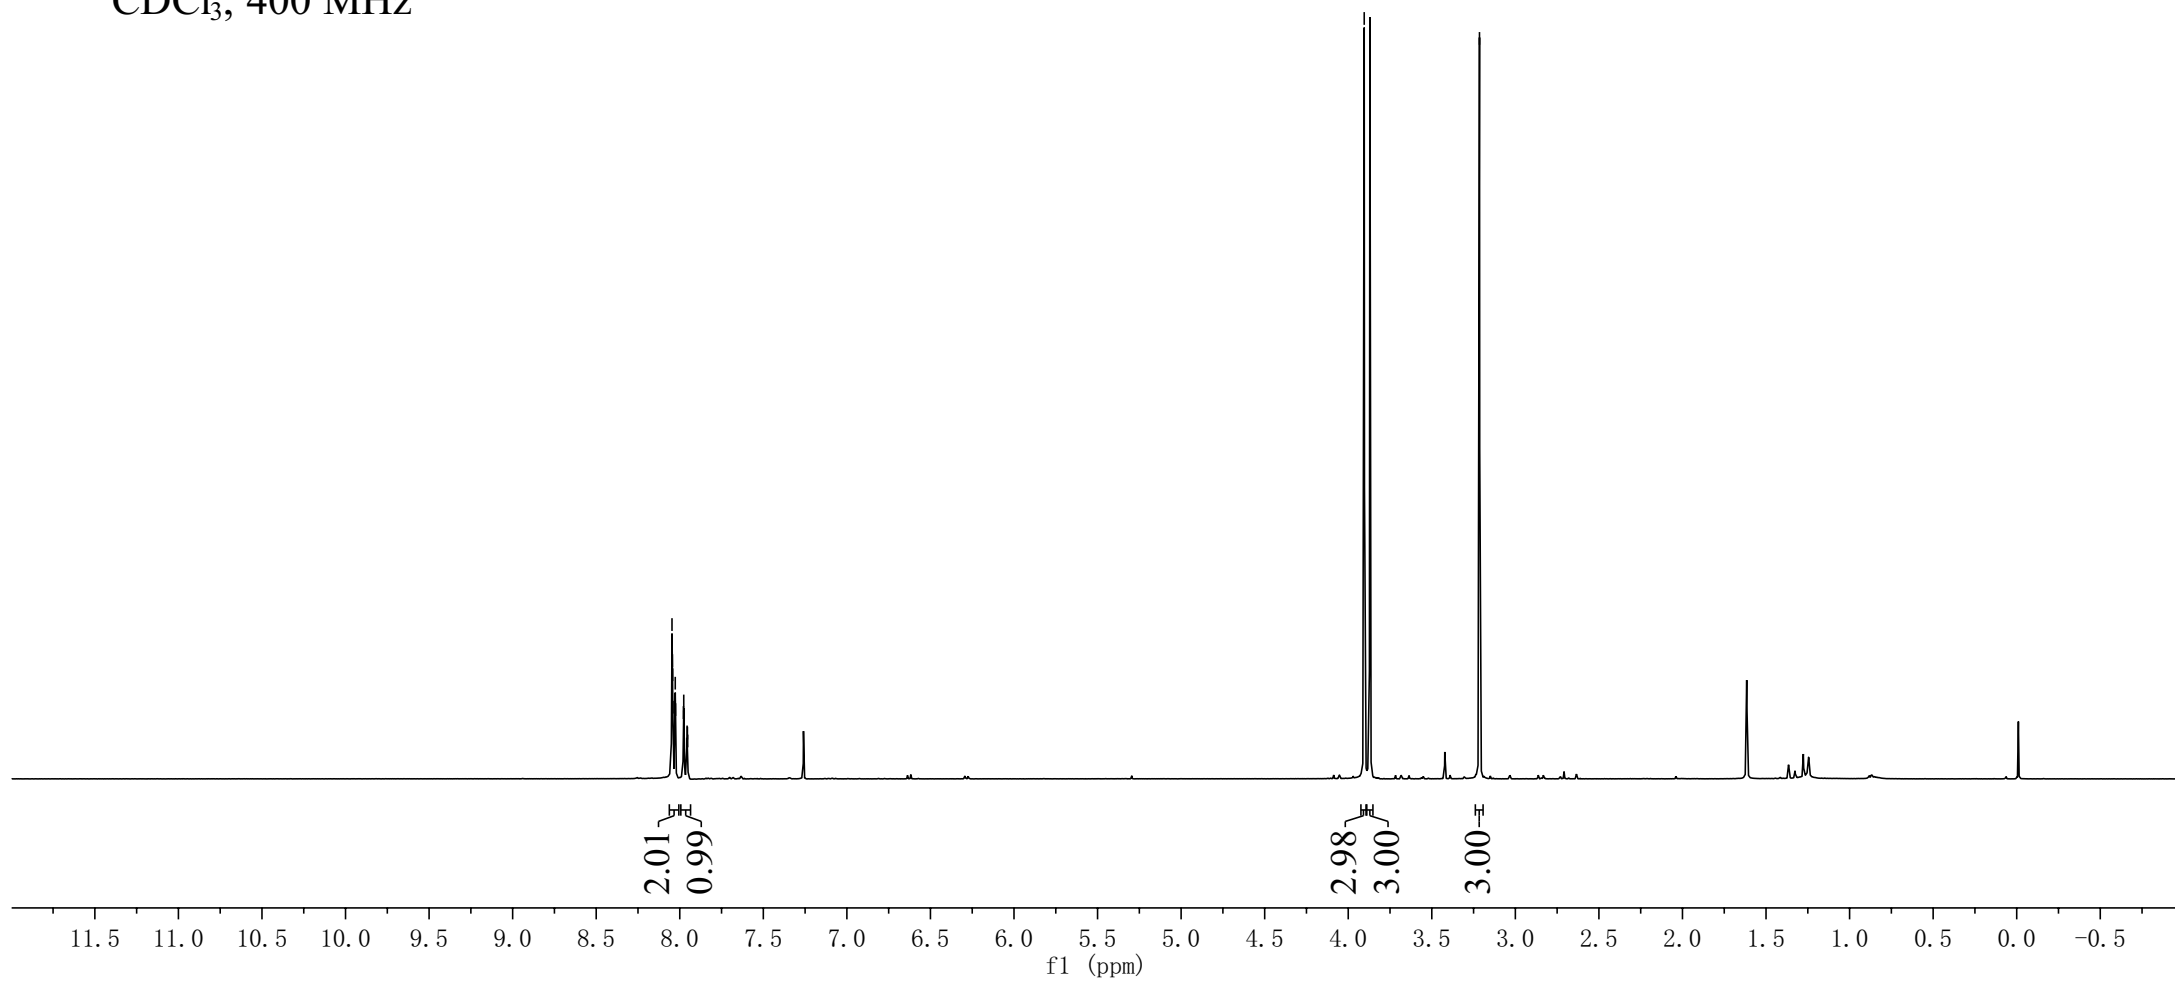



4n

CDCl<sub>3</sub>, 101 MHz

166.1354  
163.9634  
143.3649  
135.8918  
135.5606  
135.0539  
129.5708  
129.5384  
129.5025  
129.4698  
129.2370  
124.0168  
123.5320  
123.4938  
123.4536  
123.4152  
122.5332  
121.2977  
— 103.6143

77.3617  
77.0442  
76.7264

53.3363  
53.0729

— 30.8446

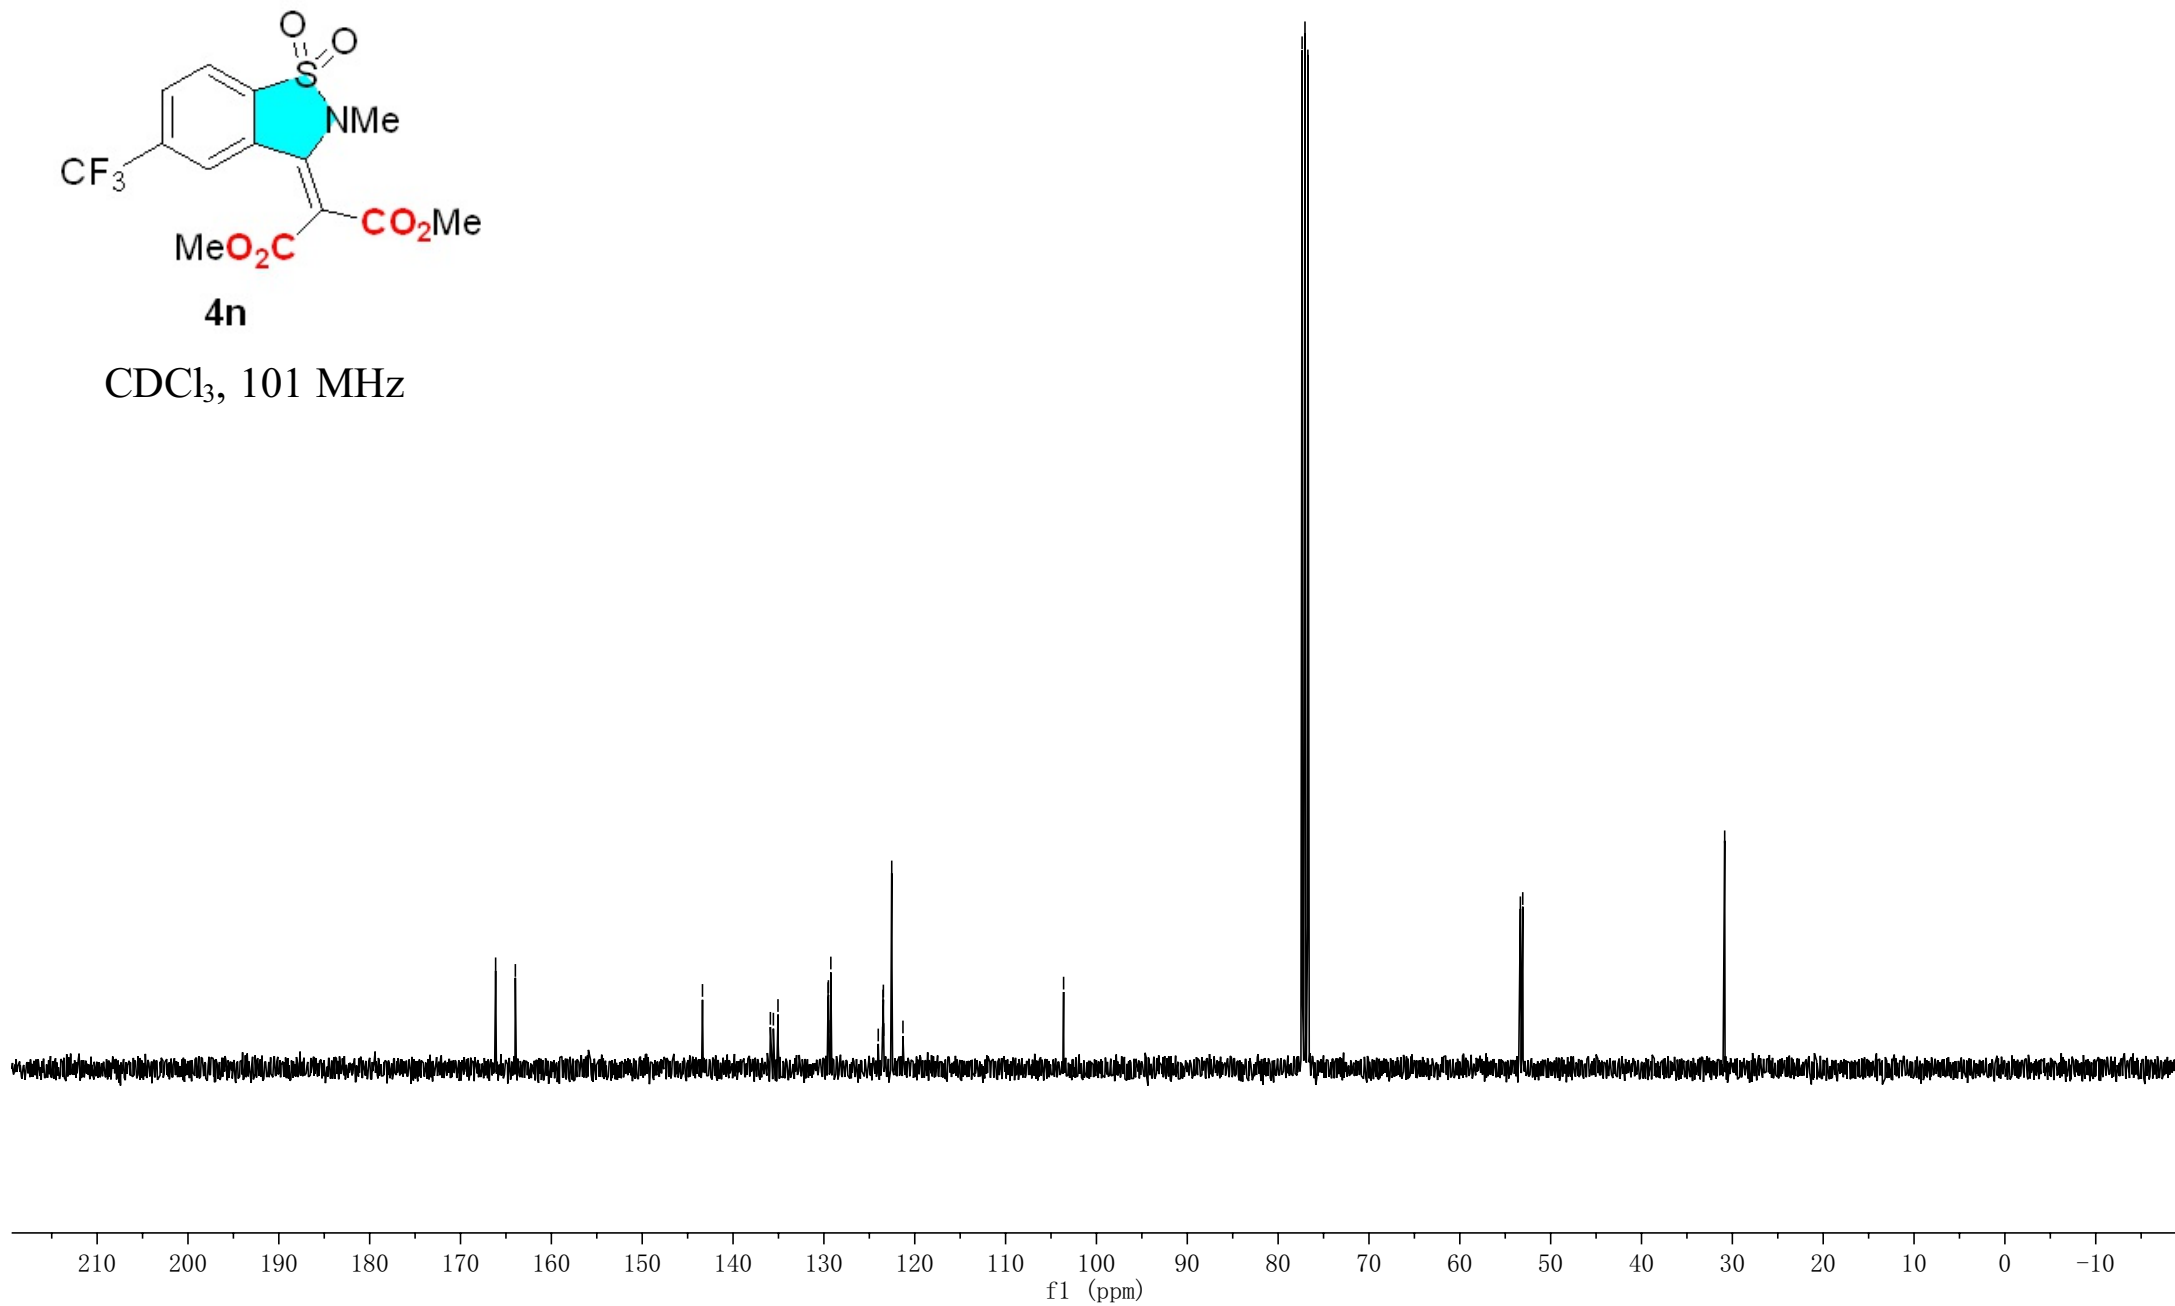

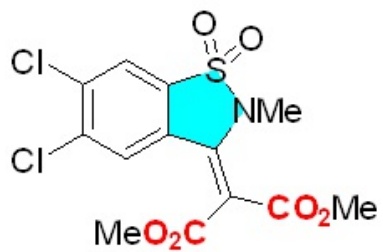

4o

CDCl<sub>3</sub>, 400 MHz

7.9583  
7.9199

7.2601

3.9086  
3.8595

3.1760

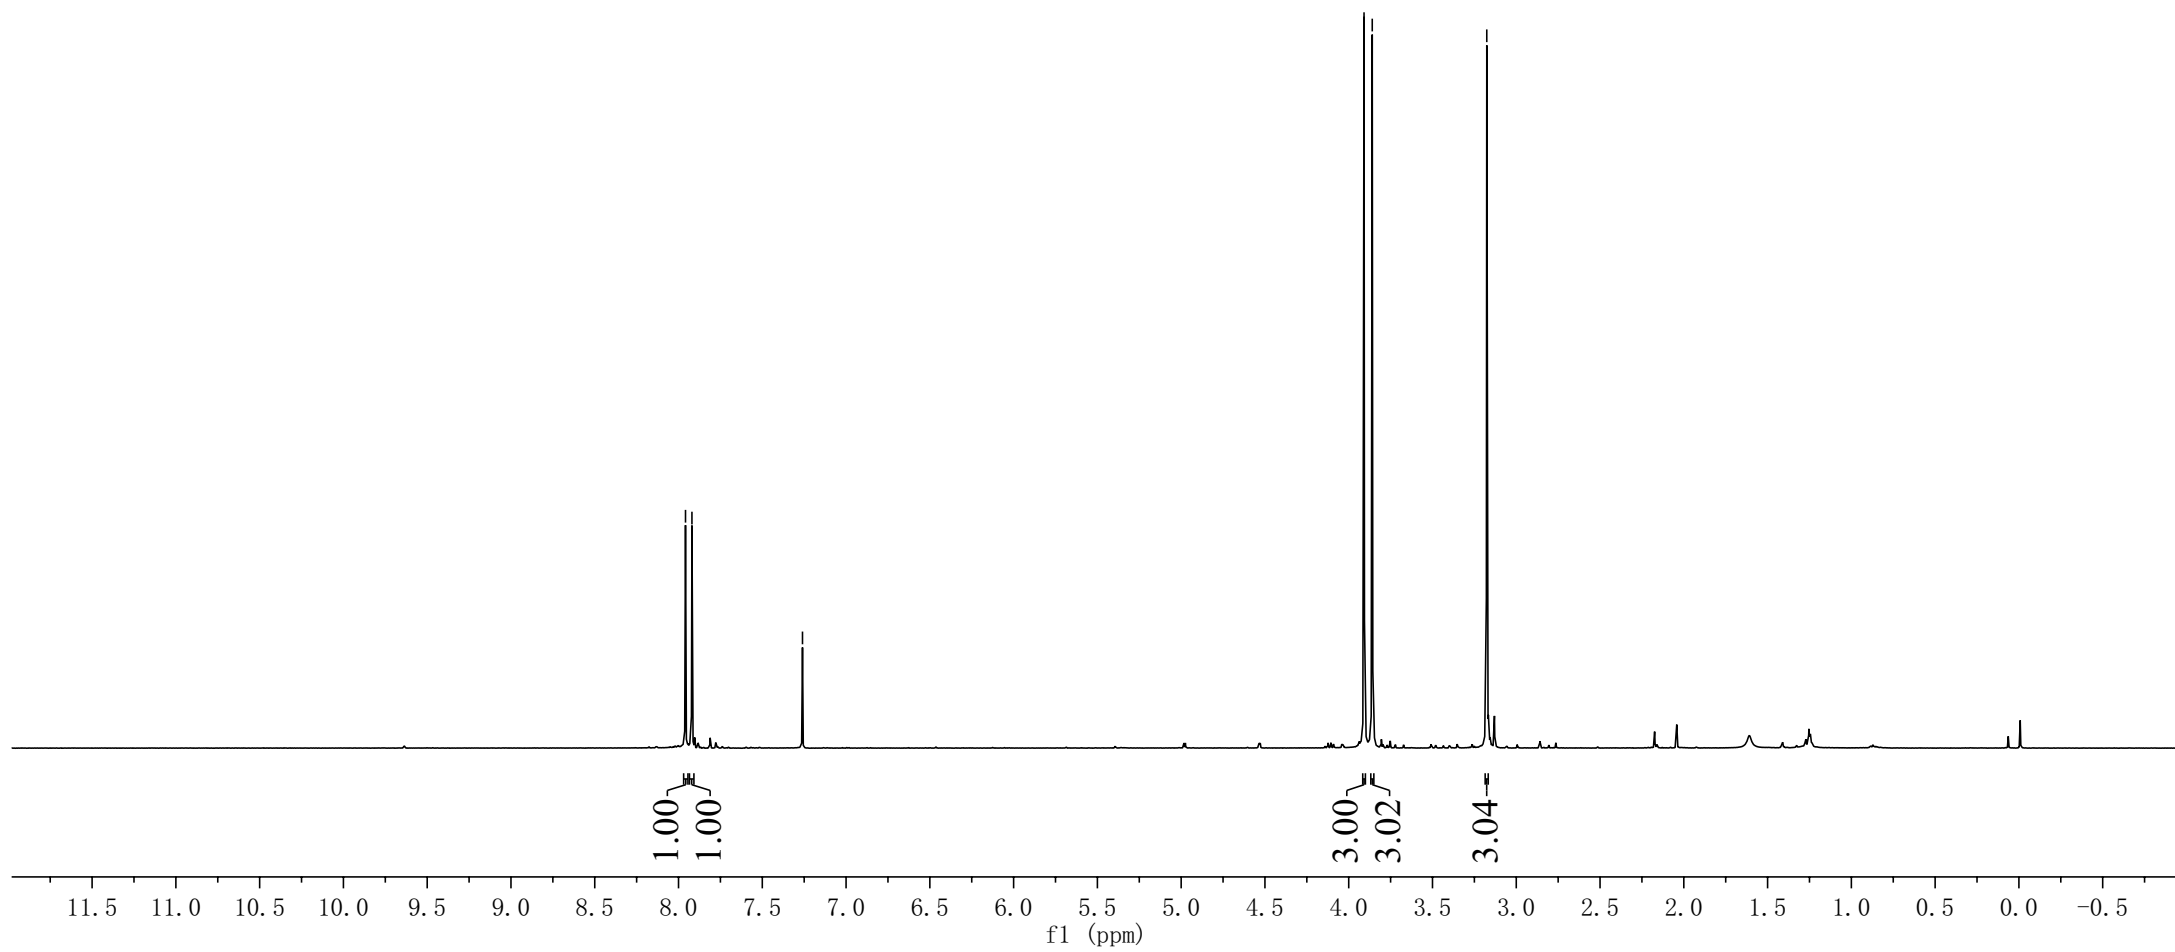

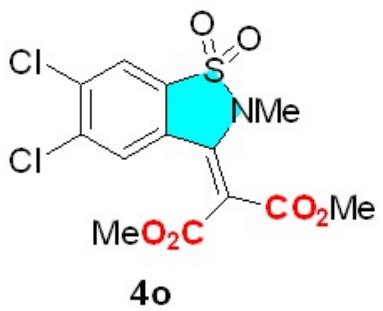

CDCl<sub>3</sub>, 101 MHz

166.04  
164.06

143.10  
138.86  
137.71  
131.37  
128.09  
127.62  
123.19

103.37

77.32  
77.00  
76.68

53.38  
53.04

30.78

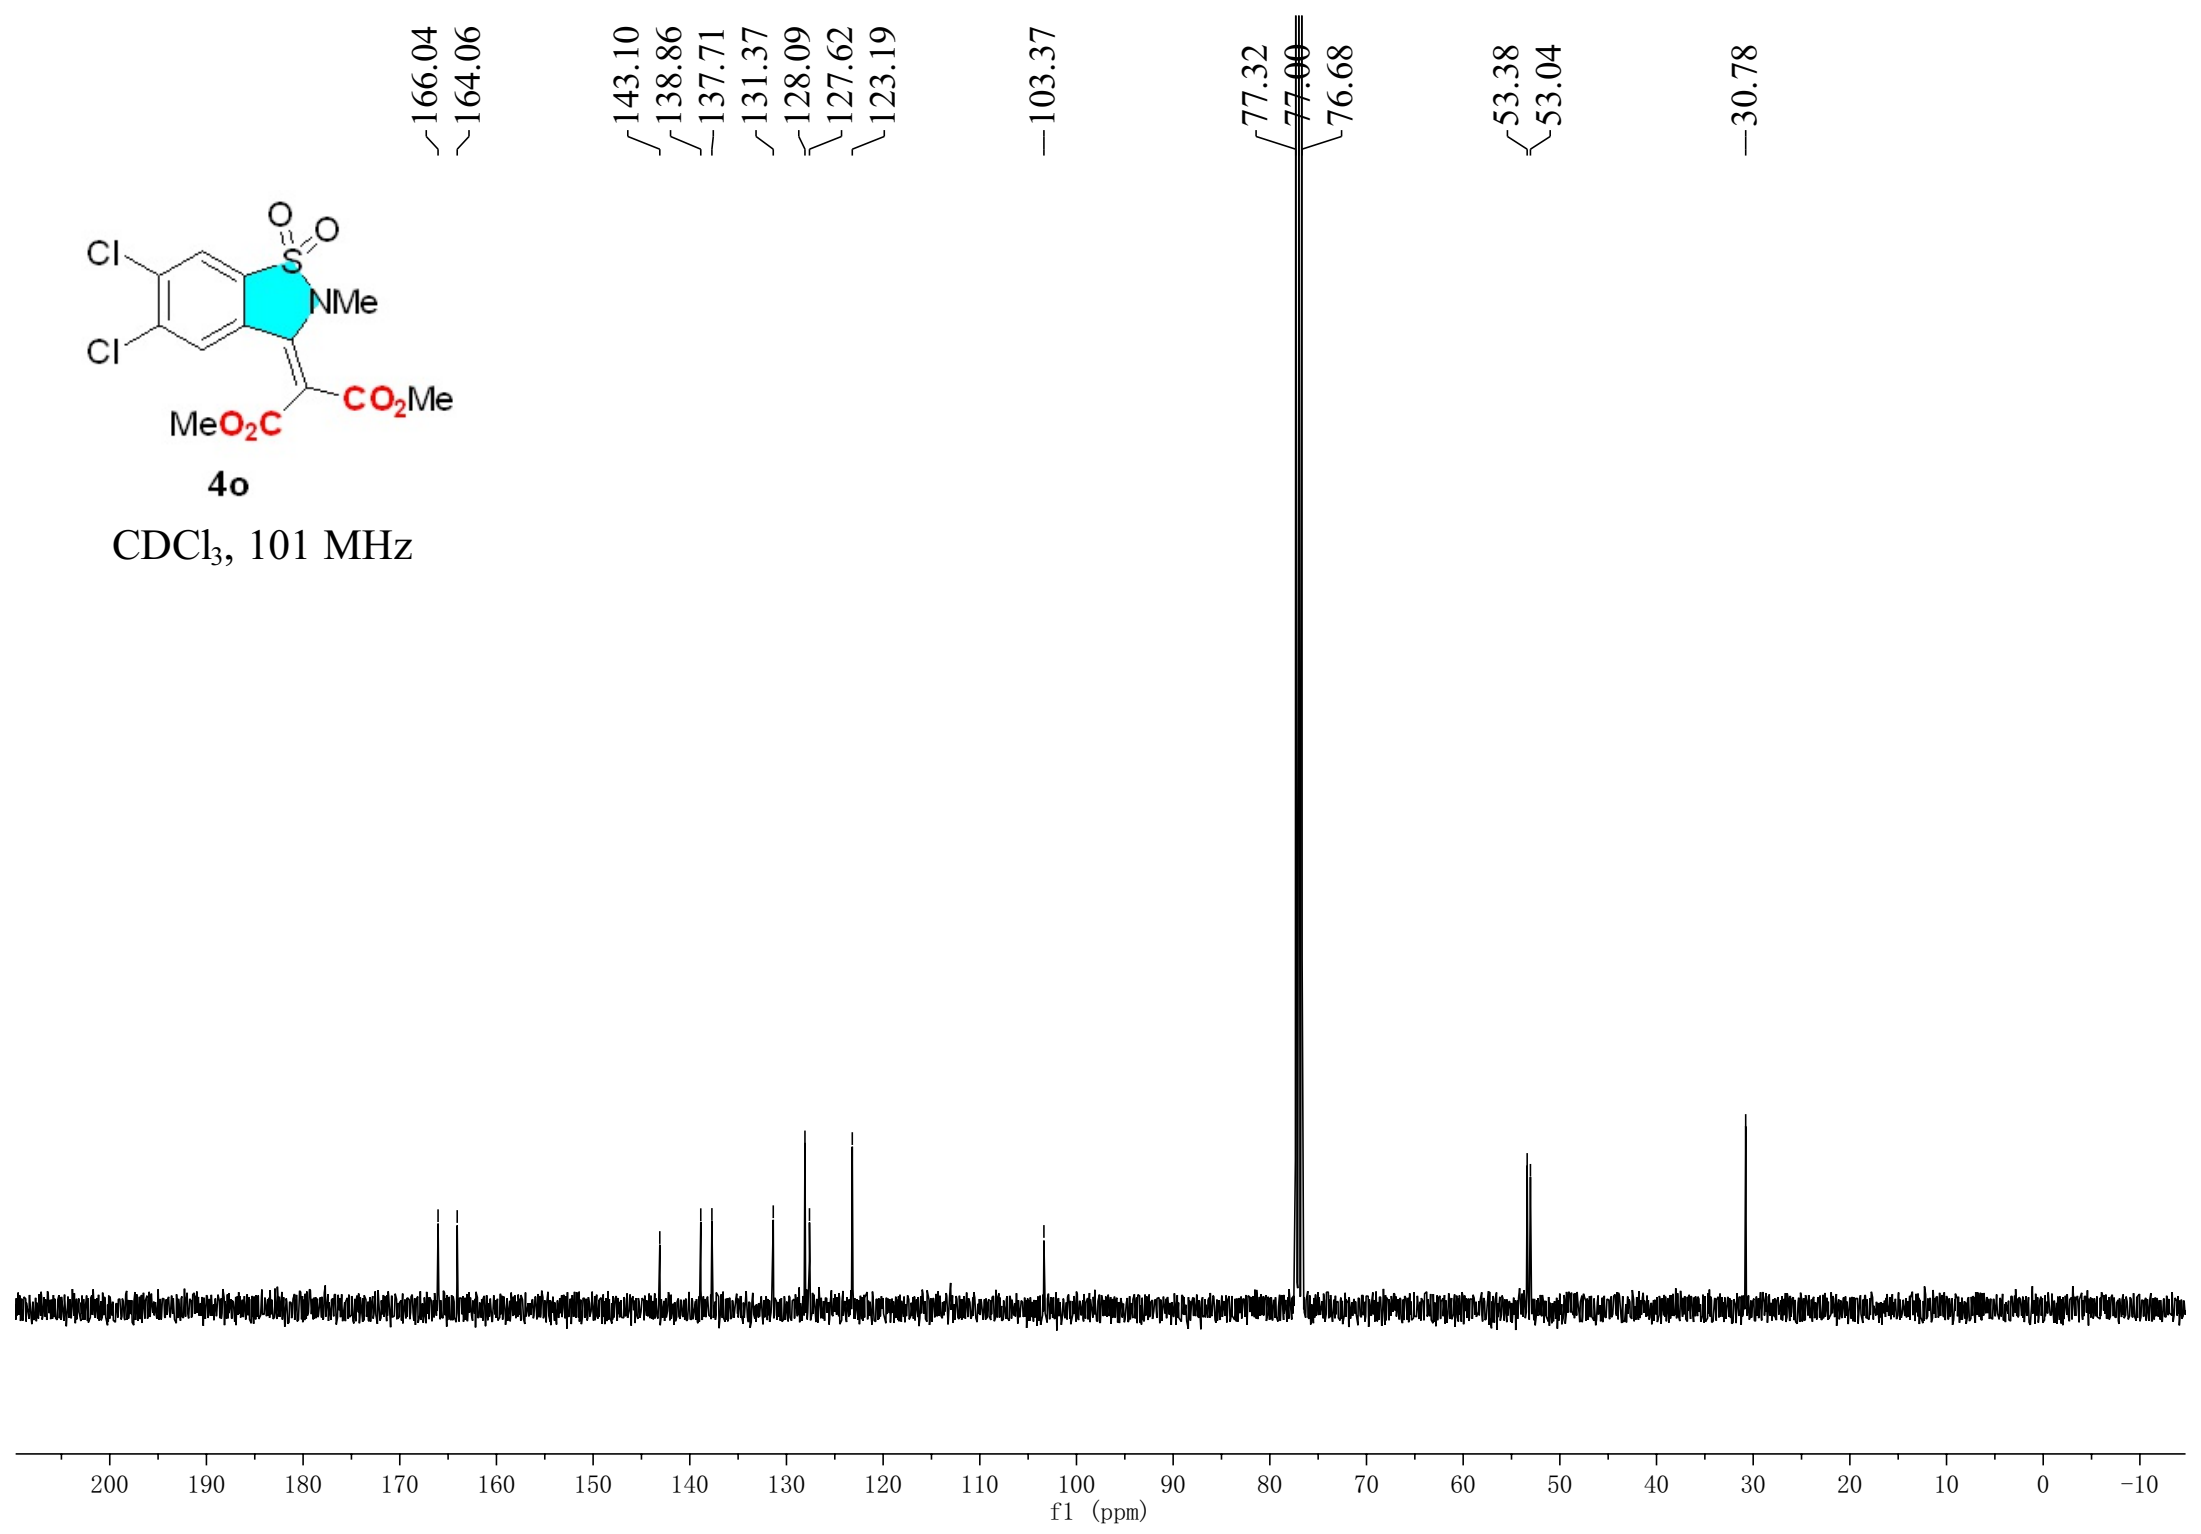

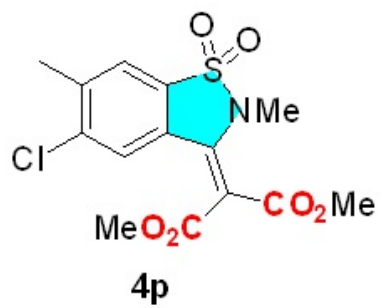

CDCl<sub>3</sub>, 400 MHz

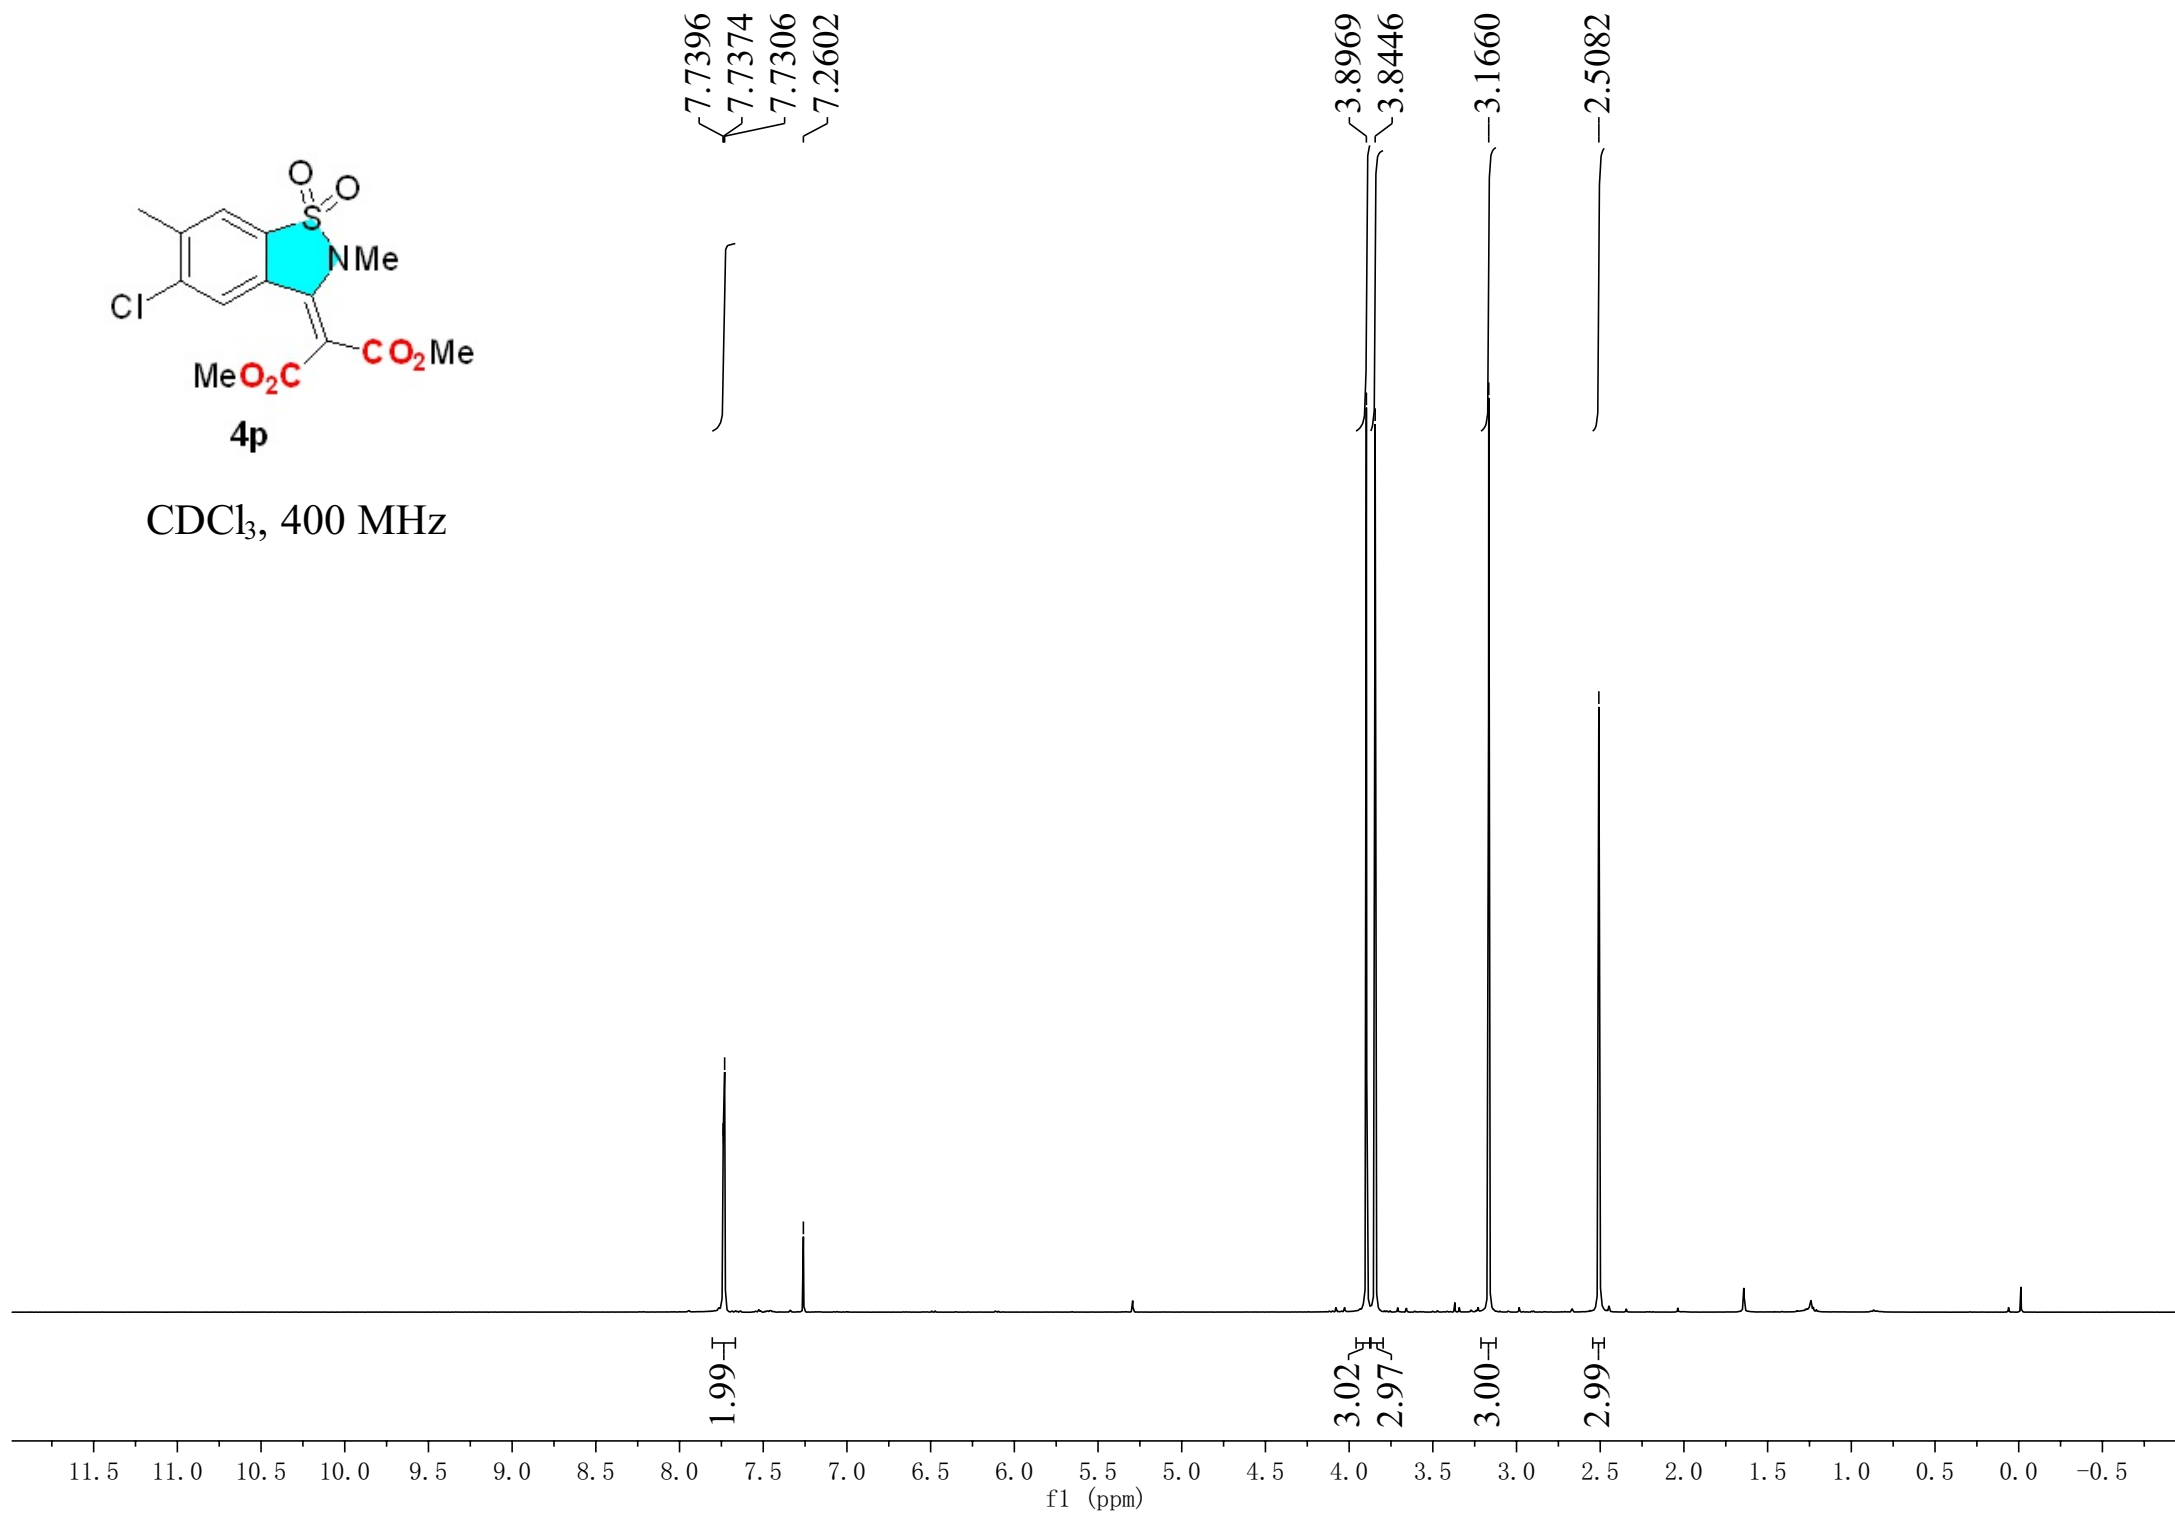

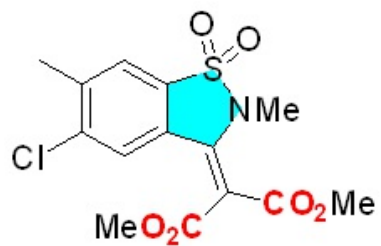

4p

CDCl<sub>3</sub>, 101 MHz

166.38  
164.22

144.22  
142.25  
140.56  
130.38  
127.28  
126.60  
123.12

102.12

77.32  
77.00  
76.68

53.23  
52.88

30.72

20.72

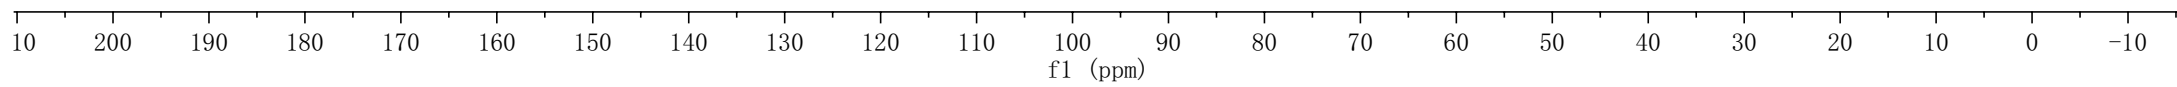

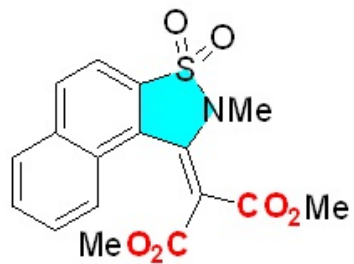

4r

CDCl<sub>3</sub>, 400 MHz

8.3957  
8.3926  
8.3754  
8.3721  
8.0734  
8.0512  
7.9949  
7.9913  
7.9758  
7.9723  
7.8085  
7.8050  
7.7989  
7.7909  
7.7876  
7.7841  
7.7709  
7.7668  
7.7605  
7.7567  
7.7429  
7.7398  
7.7369  
7.6263  
7.6040  
7.2601

3.9188  
3.8807  
3.2733

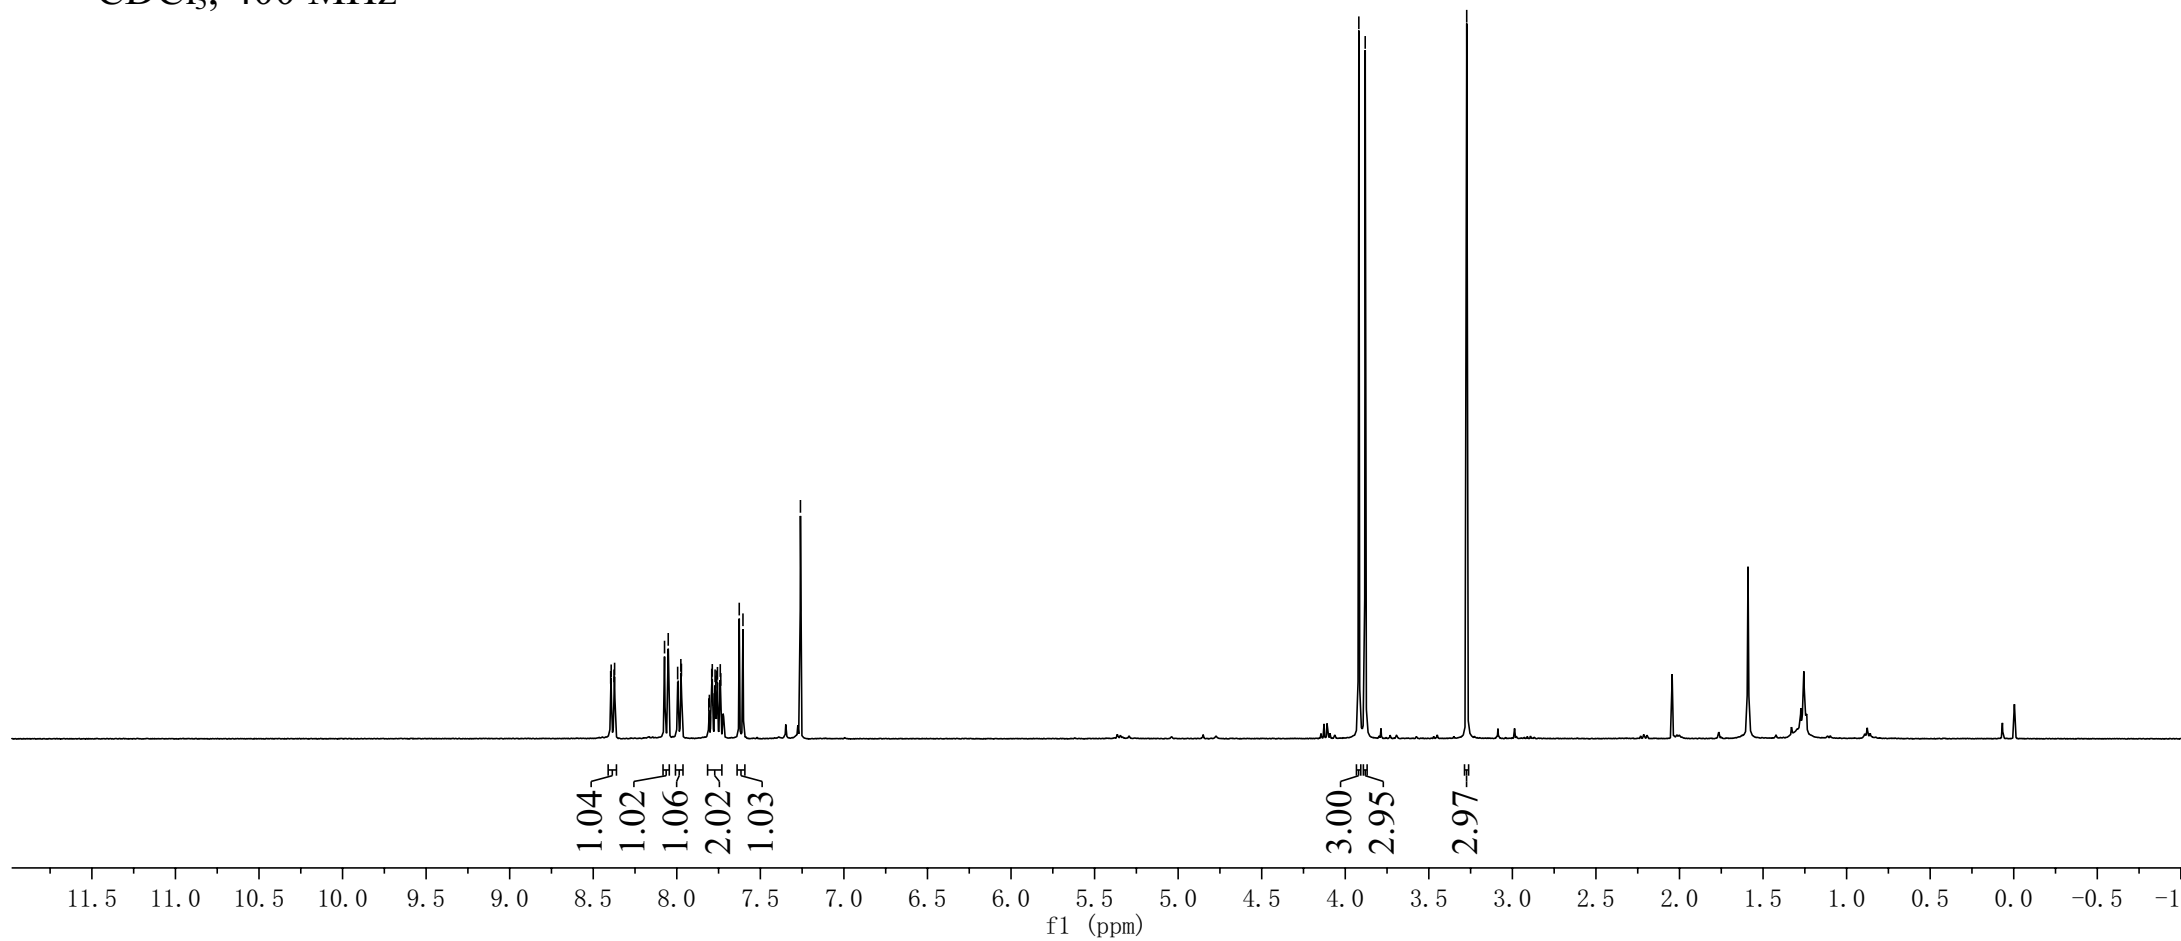



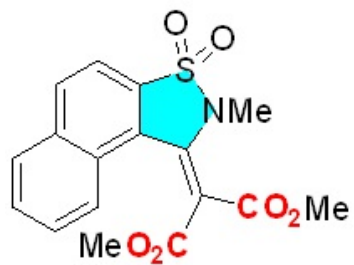

4r

CDCl<sub>3</sub>, 101 MHz

~166.89  
~164.44

—146.02  
134.64  
134.04  
129.86  
129.67  
128.68  
128.59  
127.26  
124.69  
123.86  
120.48  
102.44

77.32  
77.00  
76.68

53.21  
52.85

—30.90

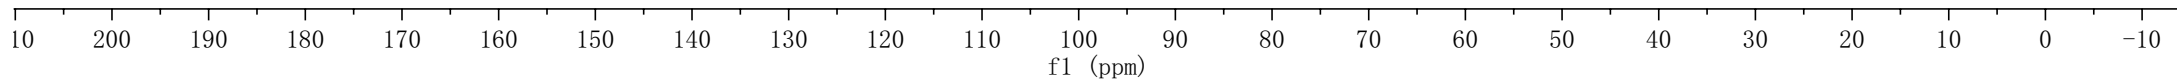

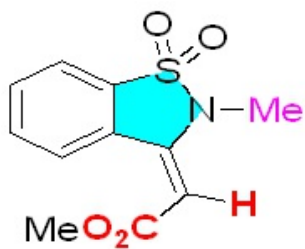

4a'

CDCl<sub>3</sub>, 400 MHz

9.3671  
9.3642  
9.3472  
9.3444  
7.8896  
7.8862  
7.8708  
7.8674  
7.7734  
7.7699  
7.7546  
7.7510  
7.7352  
7.7311  
7.7196  
7.7165  
7.7007  
7.6978  
7.6819  
7.6792  
7.6455  
5.3604  
3.7922  
3.1648

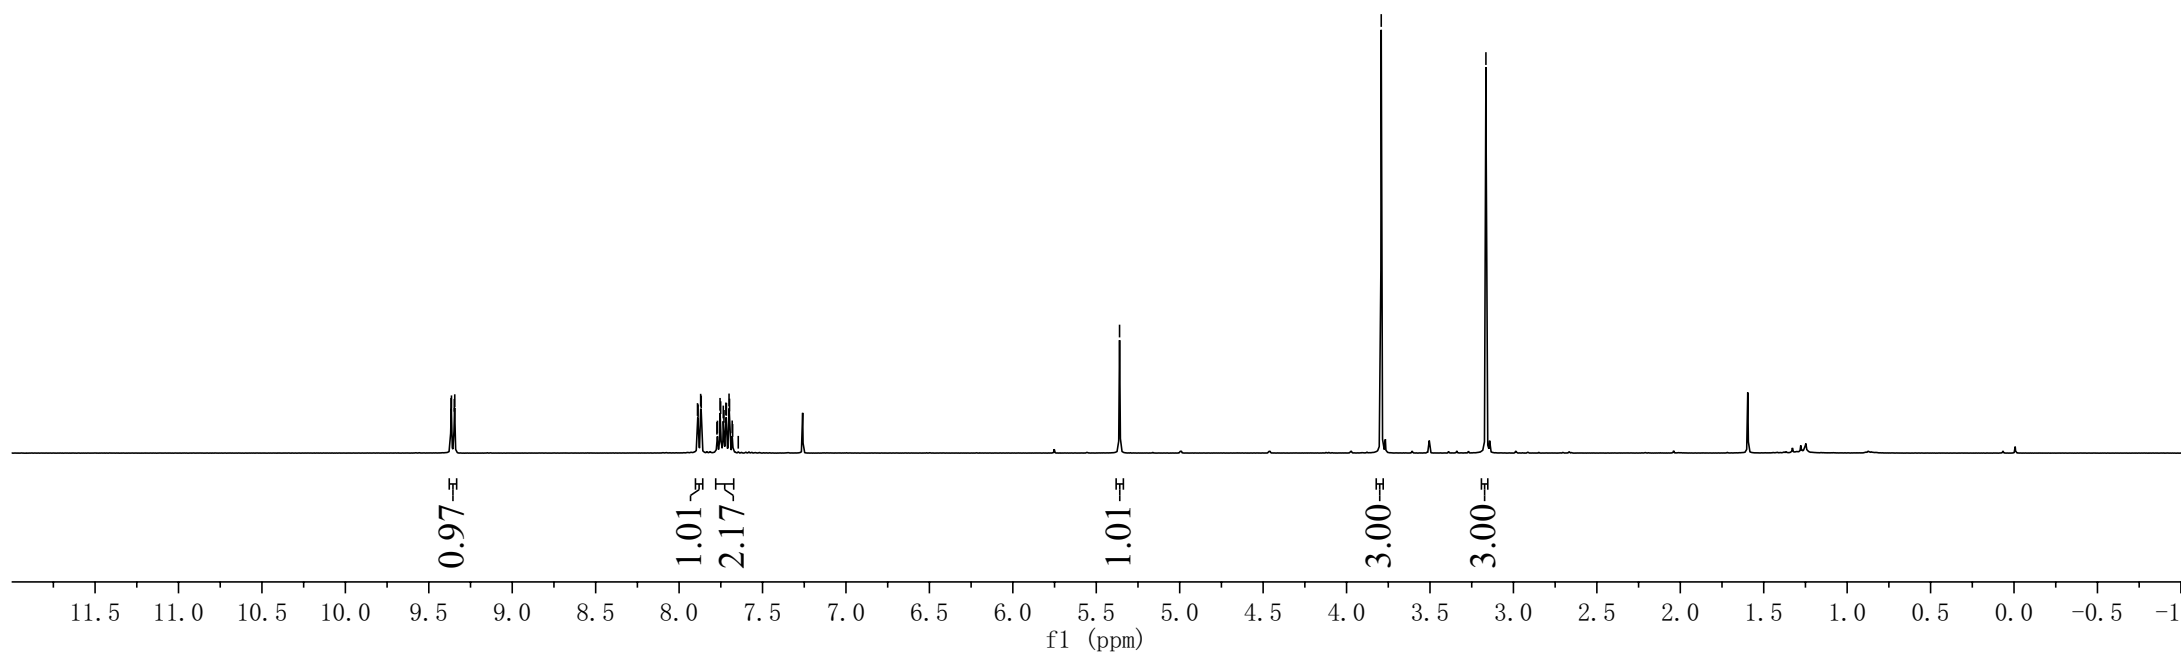

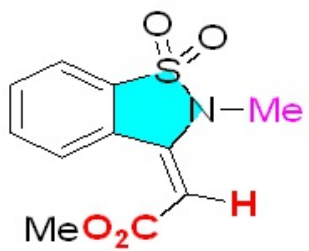

4a'

CDCl<sub>3</sub>, 101 MHz

—166.33

—144.76

133.82

133.12

132.07

129.58

127.54

120.99

—94.74

—51.75

—26.48

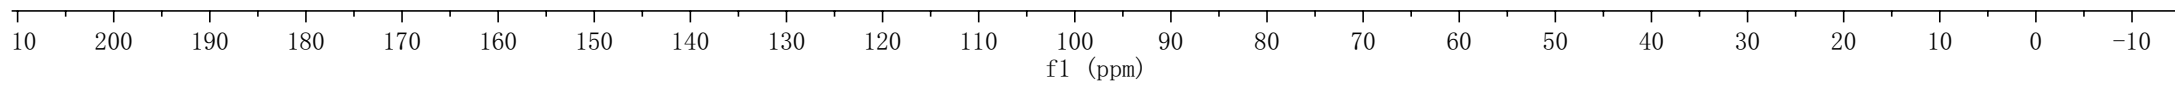

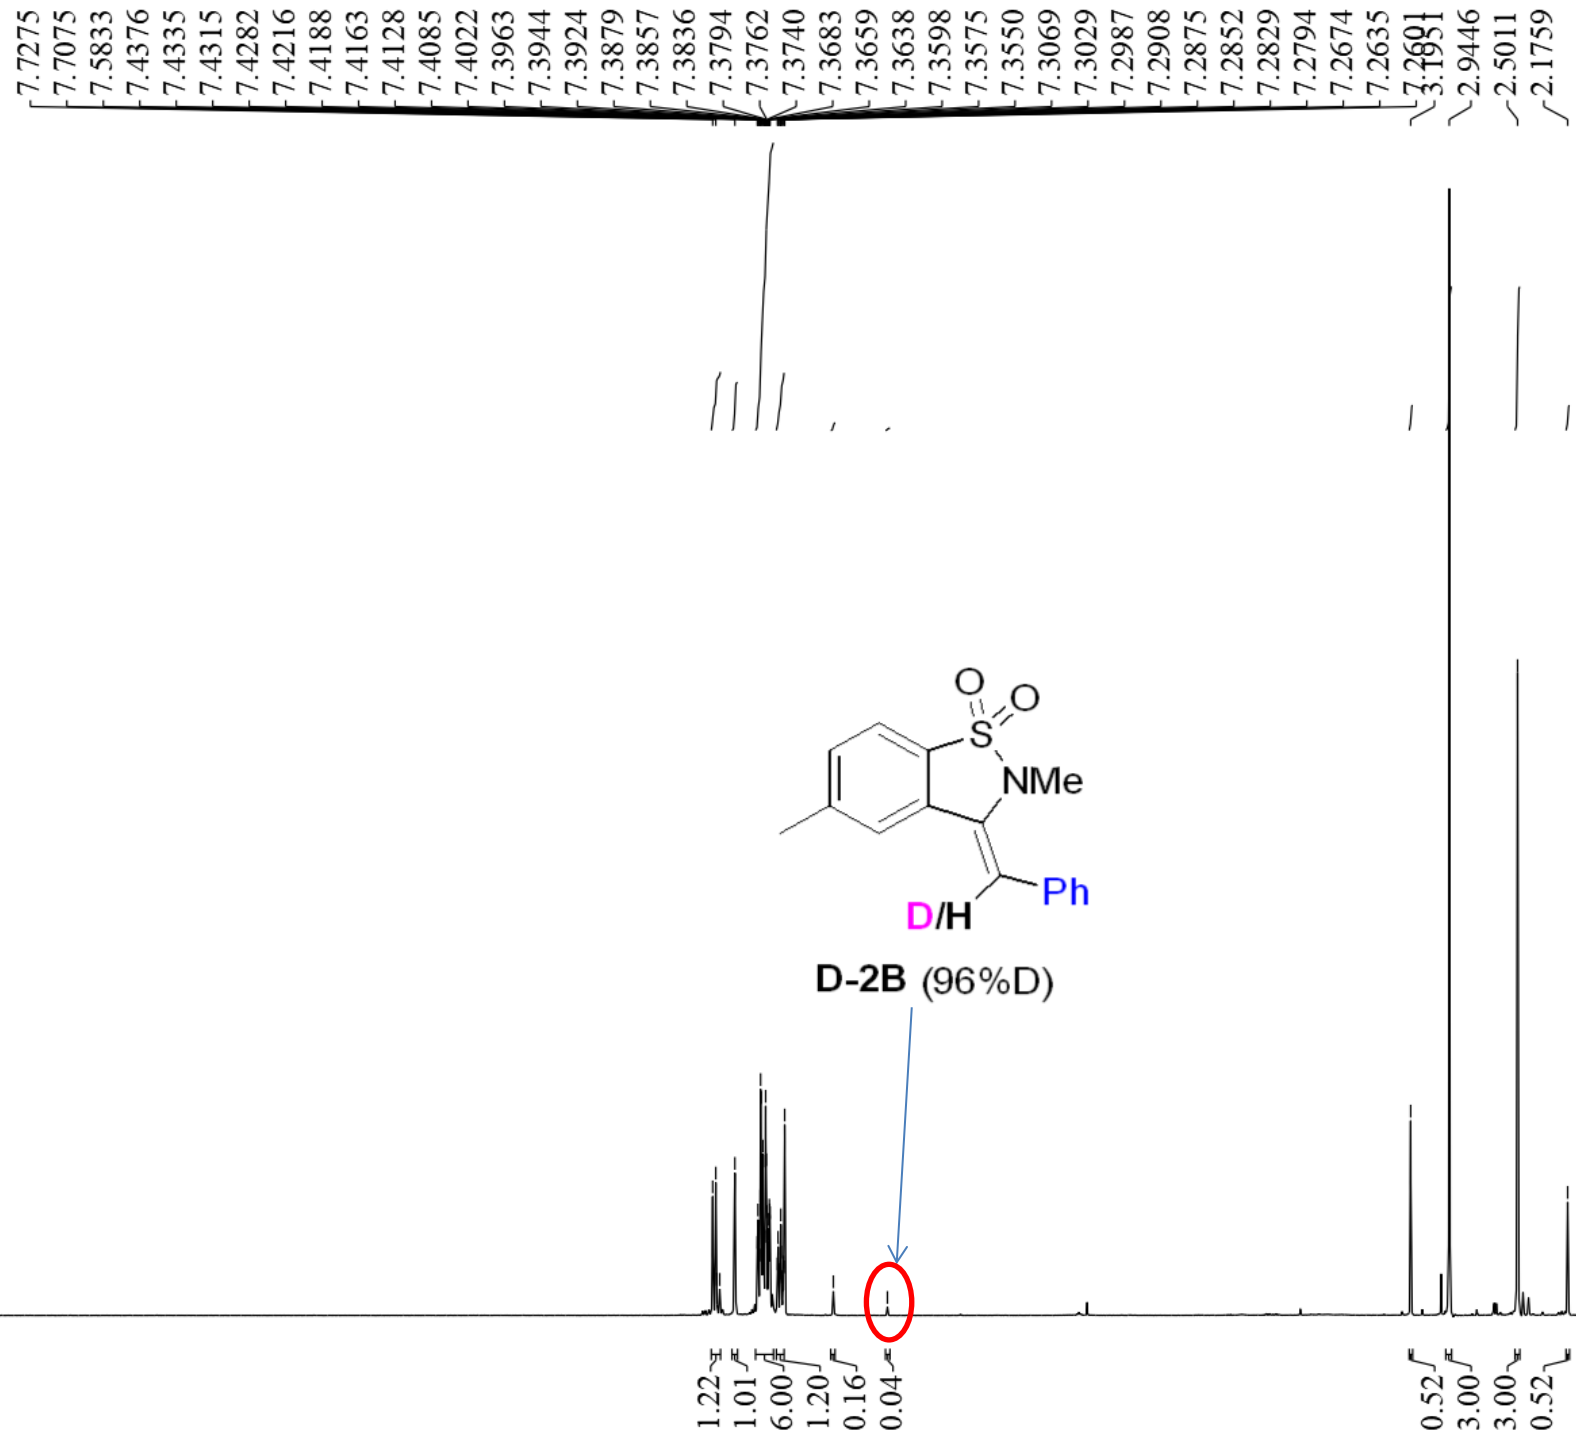

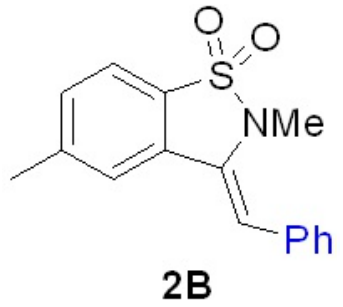

CDCl<sub>3</sub>, 400 MHz

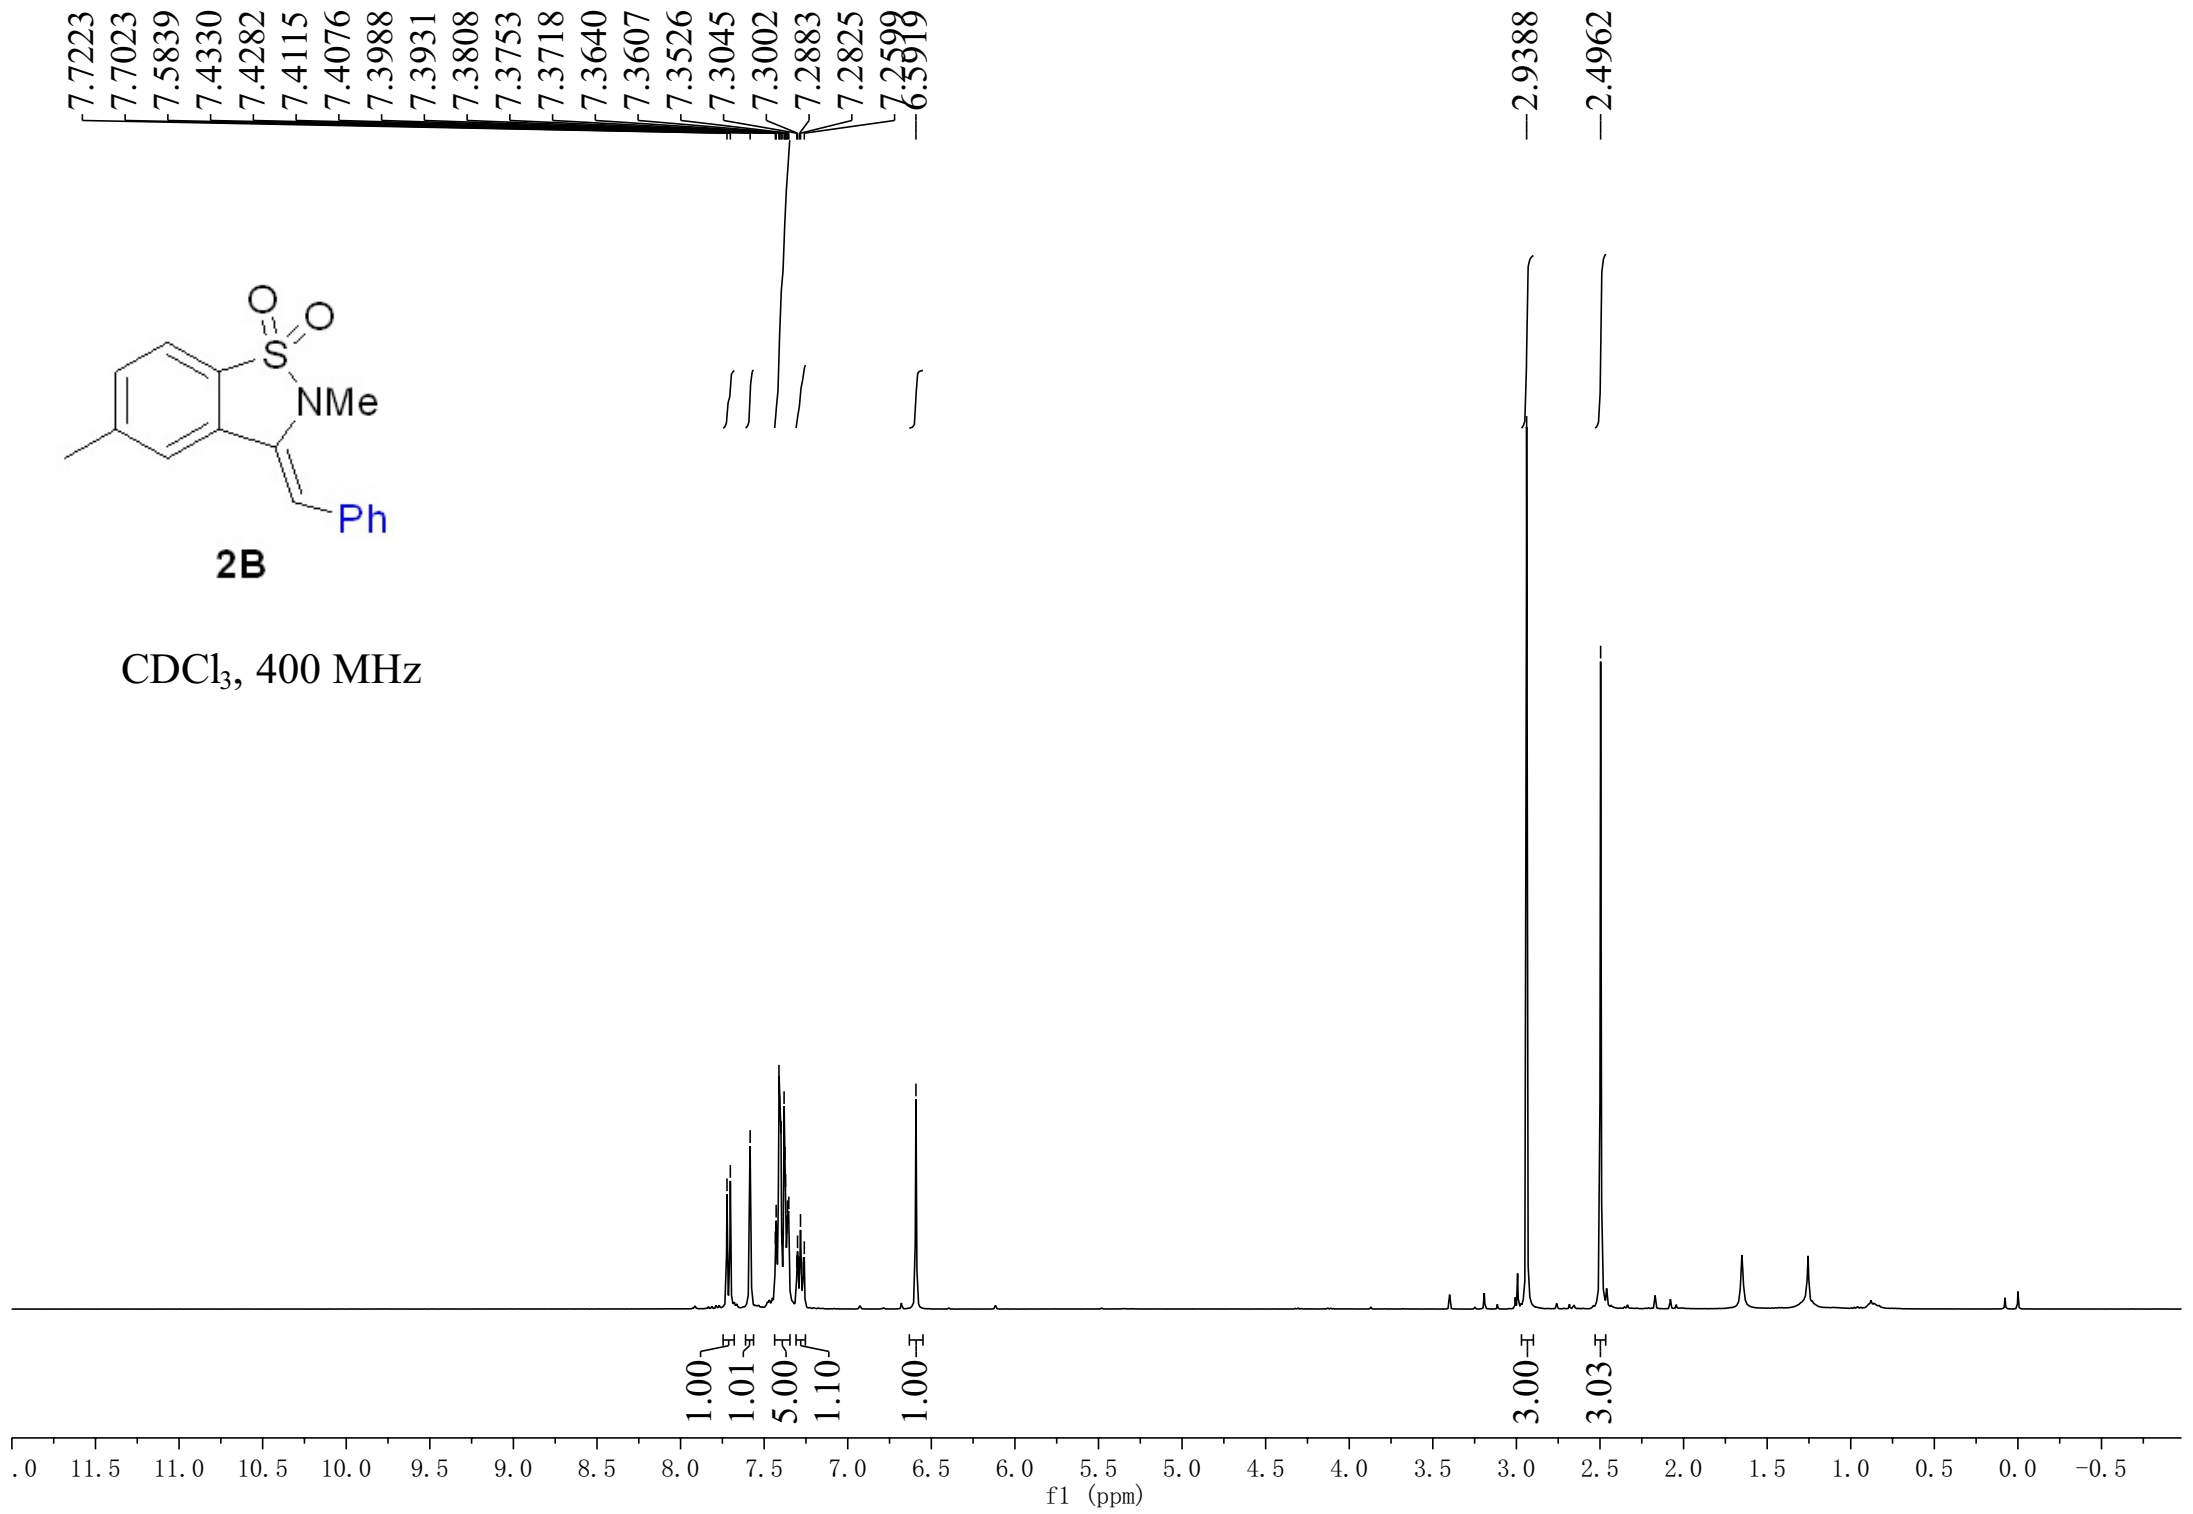

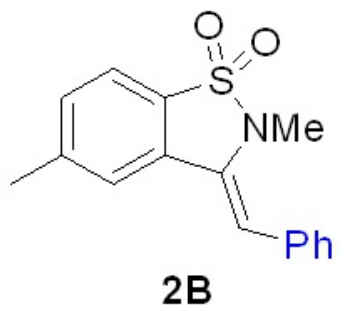

CDCl<sub>3</sub>, 101 MHz

144.04  
134.14  
134.02  
132.83  
131.00  
129.59  
128.92  
128.23  
127.44  
120.94  
120.92  
-105.48

77.32  
77.00  
76.68

-32.07

-21.91

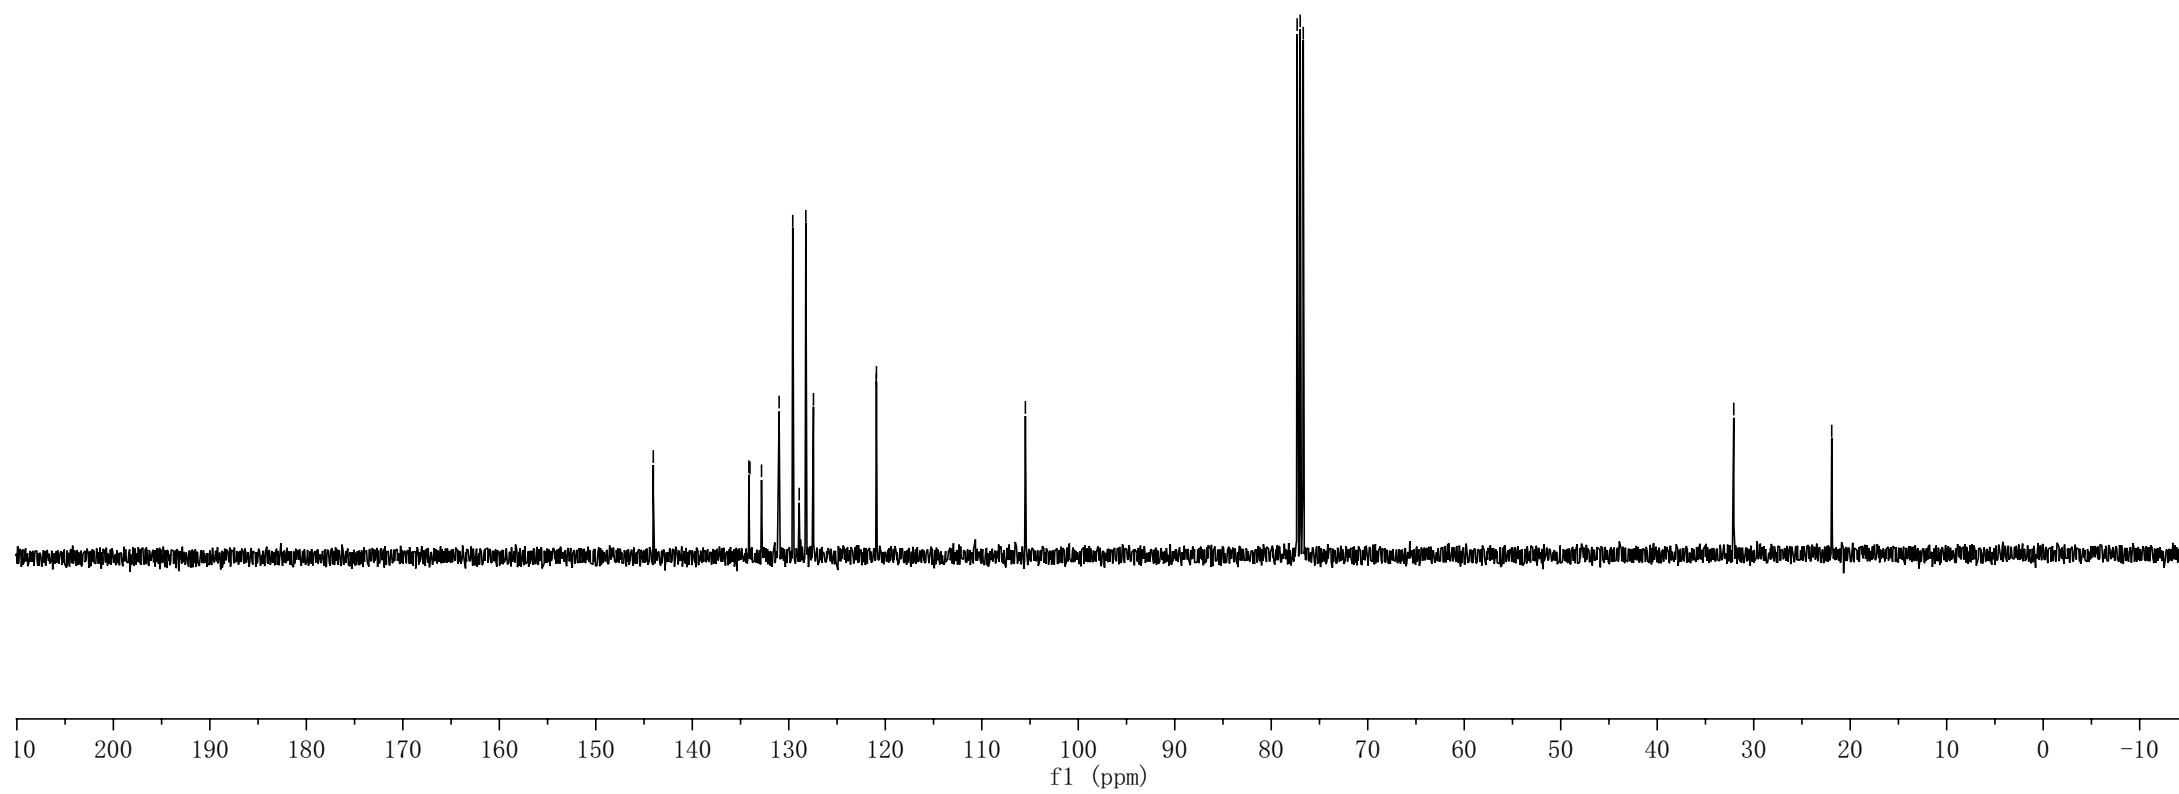

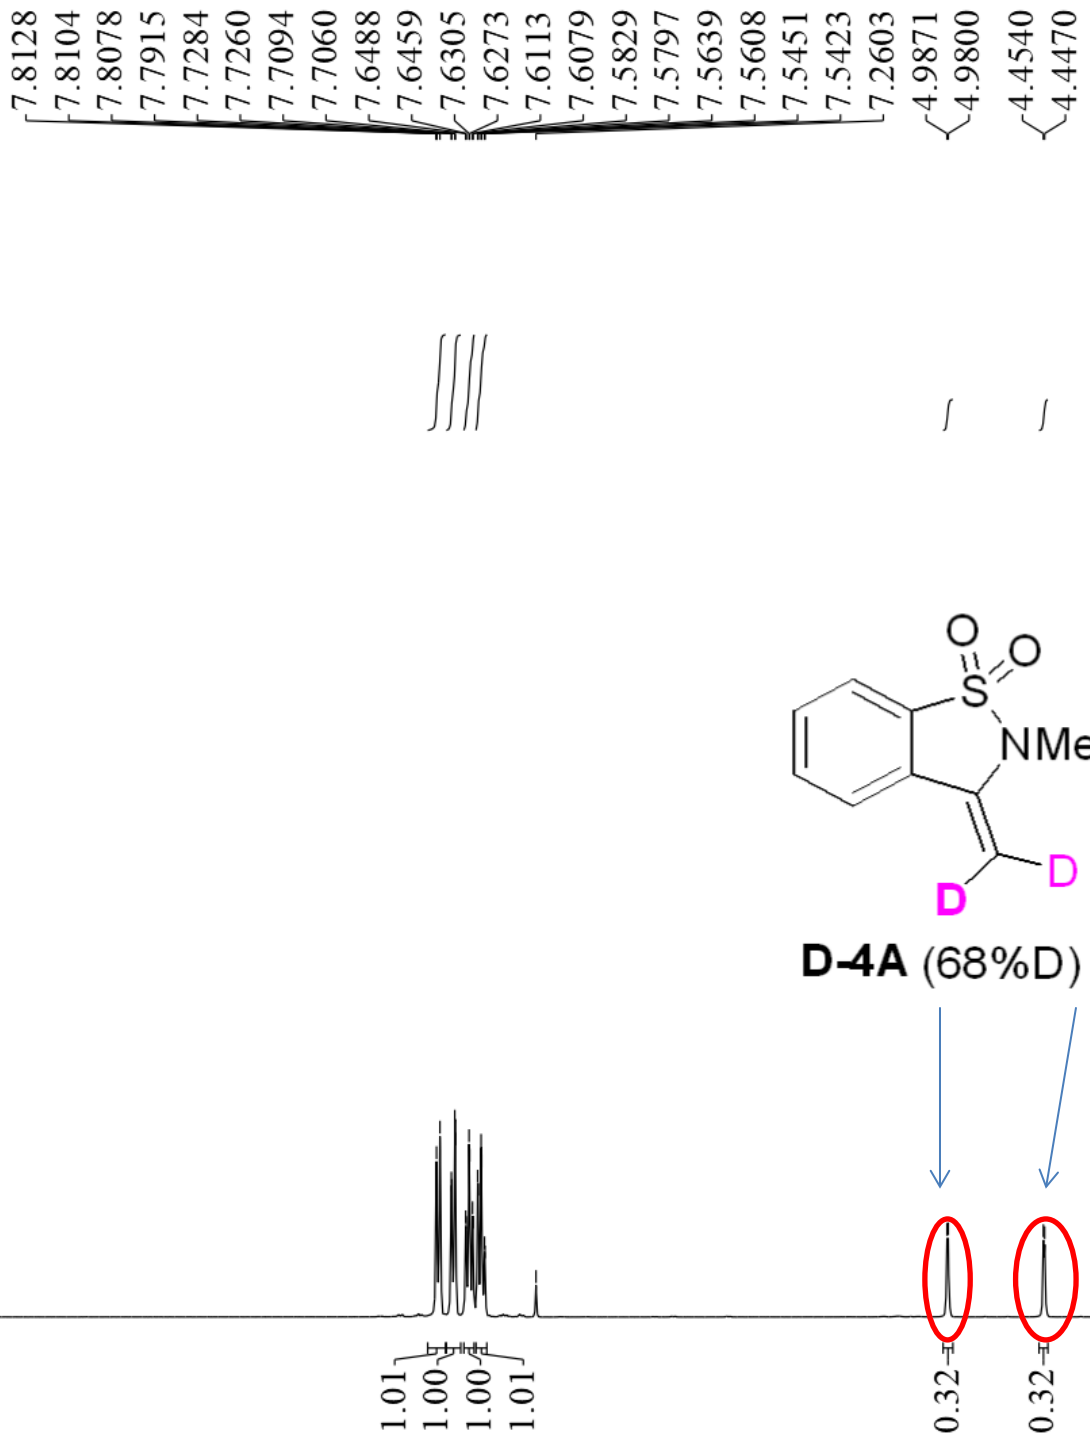

7.7773  
7.7576  
7.6907  
7.4177  
7.4006  
7.3846  
7.3608  
7.3447  
7.3261  
7.3143  
7.3103  
7.2938  
7.2606  
7.2493  
7.2447  
7.2319  
7.0769  
7.0722  
7.0598  
6.9533  
6.4678

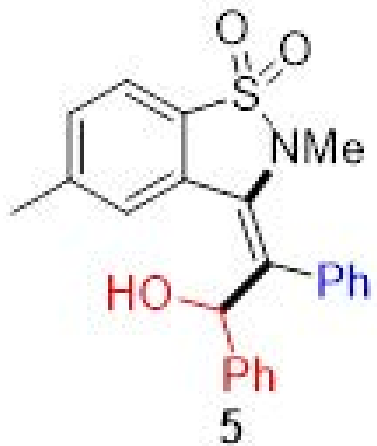

CDCl<sub>3</sub>, 400 MHz

2.6225  
2.6090  
2.4998  
2.4199

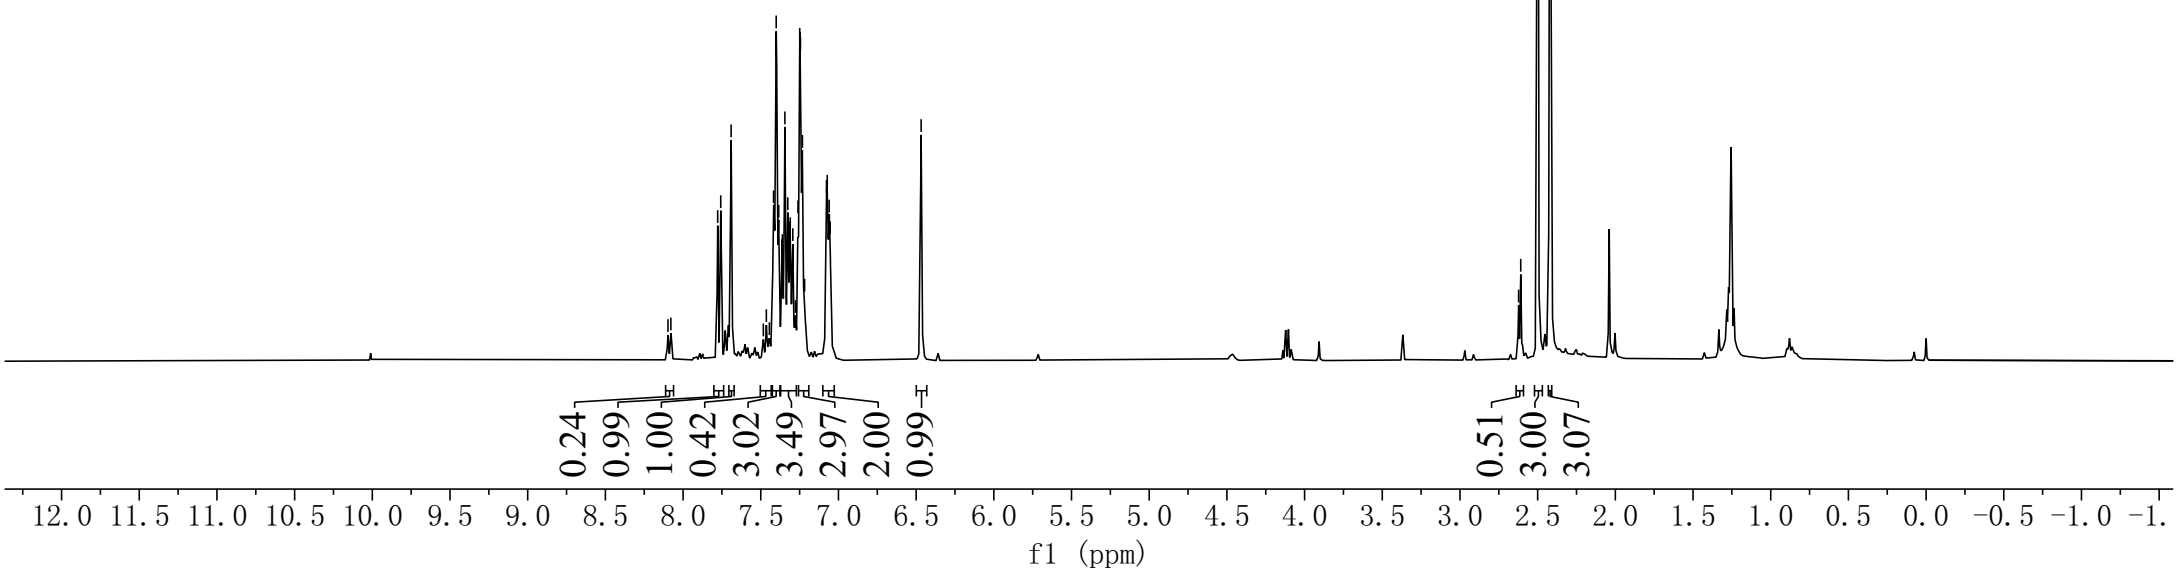



143.80  
140.73  
135.29  
134.51  
133.52  
132.82  
132.23  
130.83  
130.32  
128.51  
128.38  
128.12  
128.07  
127.68  
126.23  
126.20  
121.38

77.32  
77.00  
76.68  
71.95

-33.34

-22.15

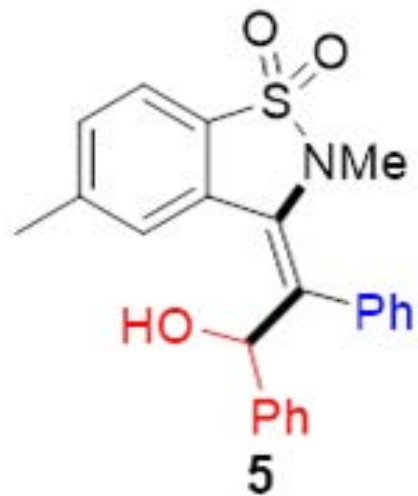

CDCl<sub>3</sub>, 101 MHz

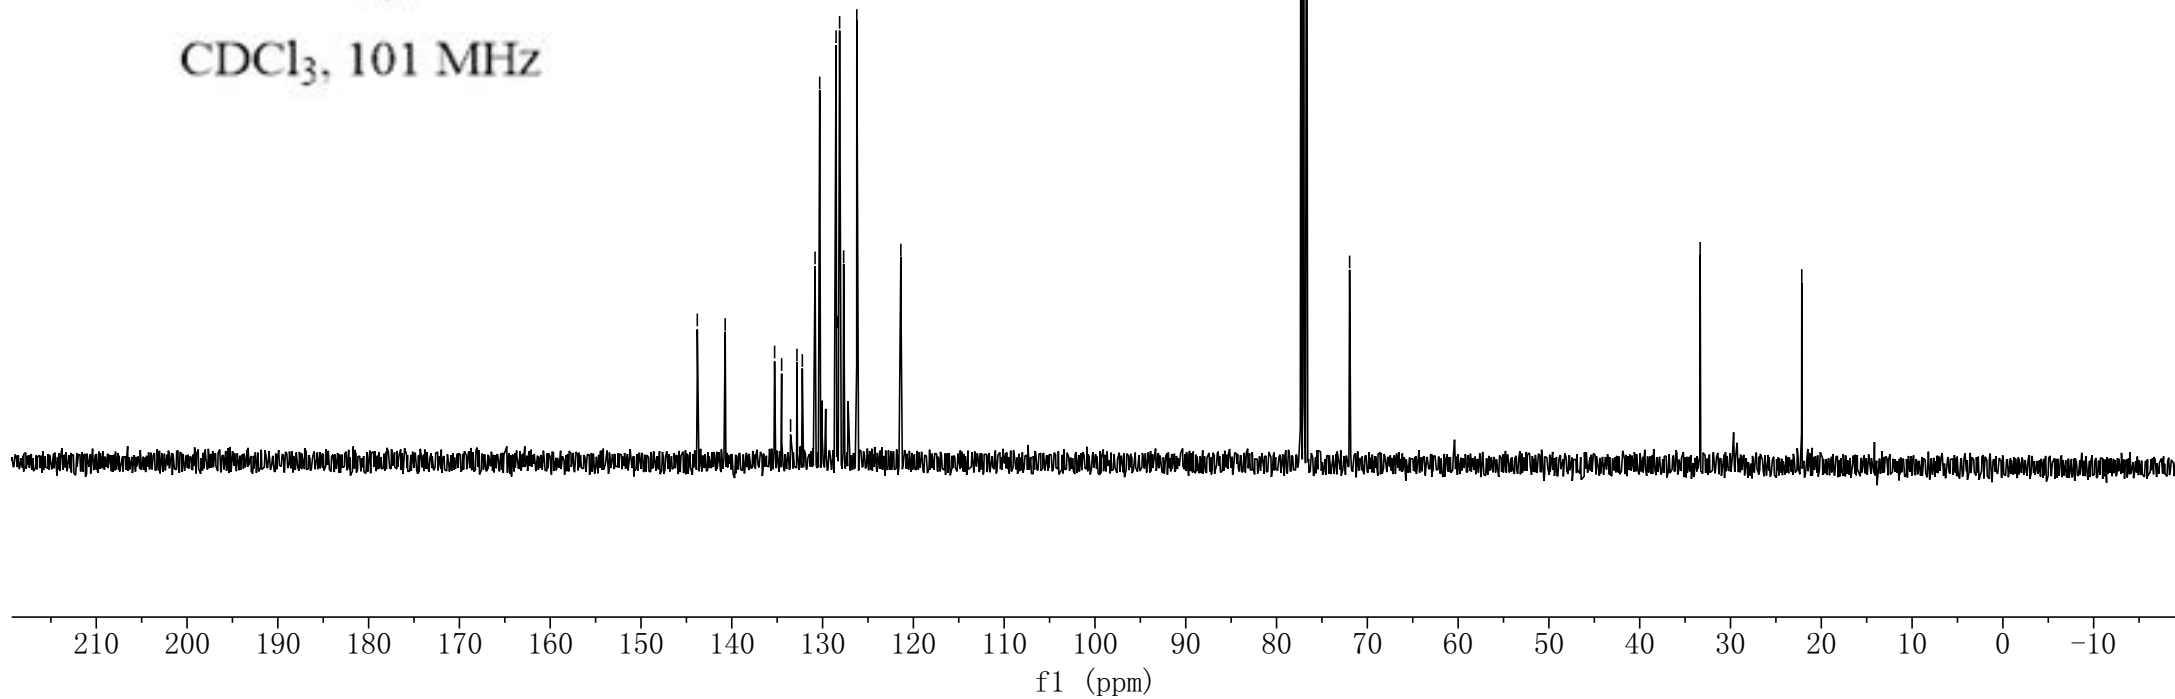

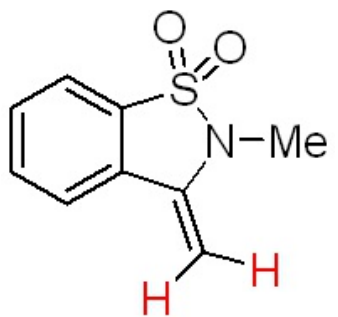

**4A**

CDCl<sub>3</sub>, 400 MHz

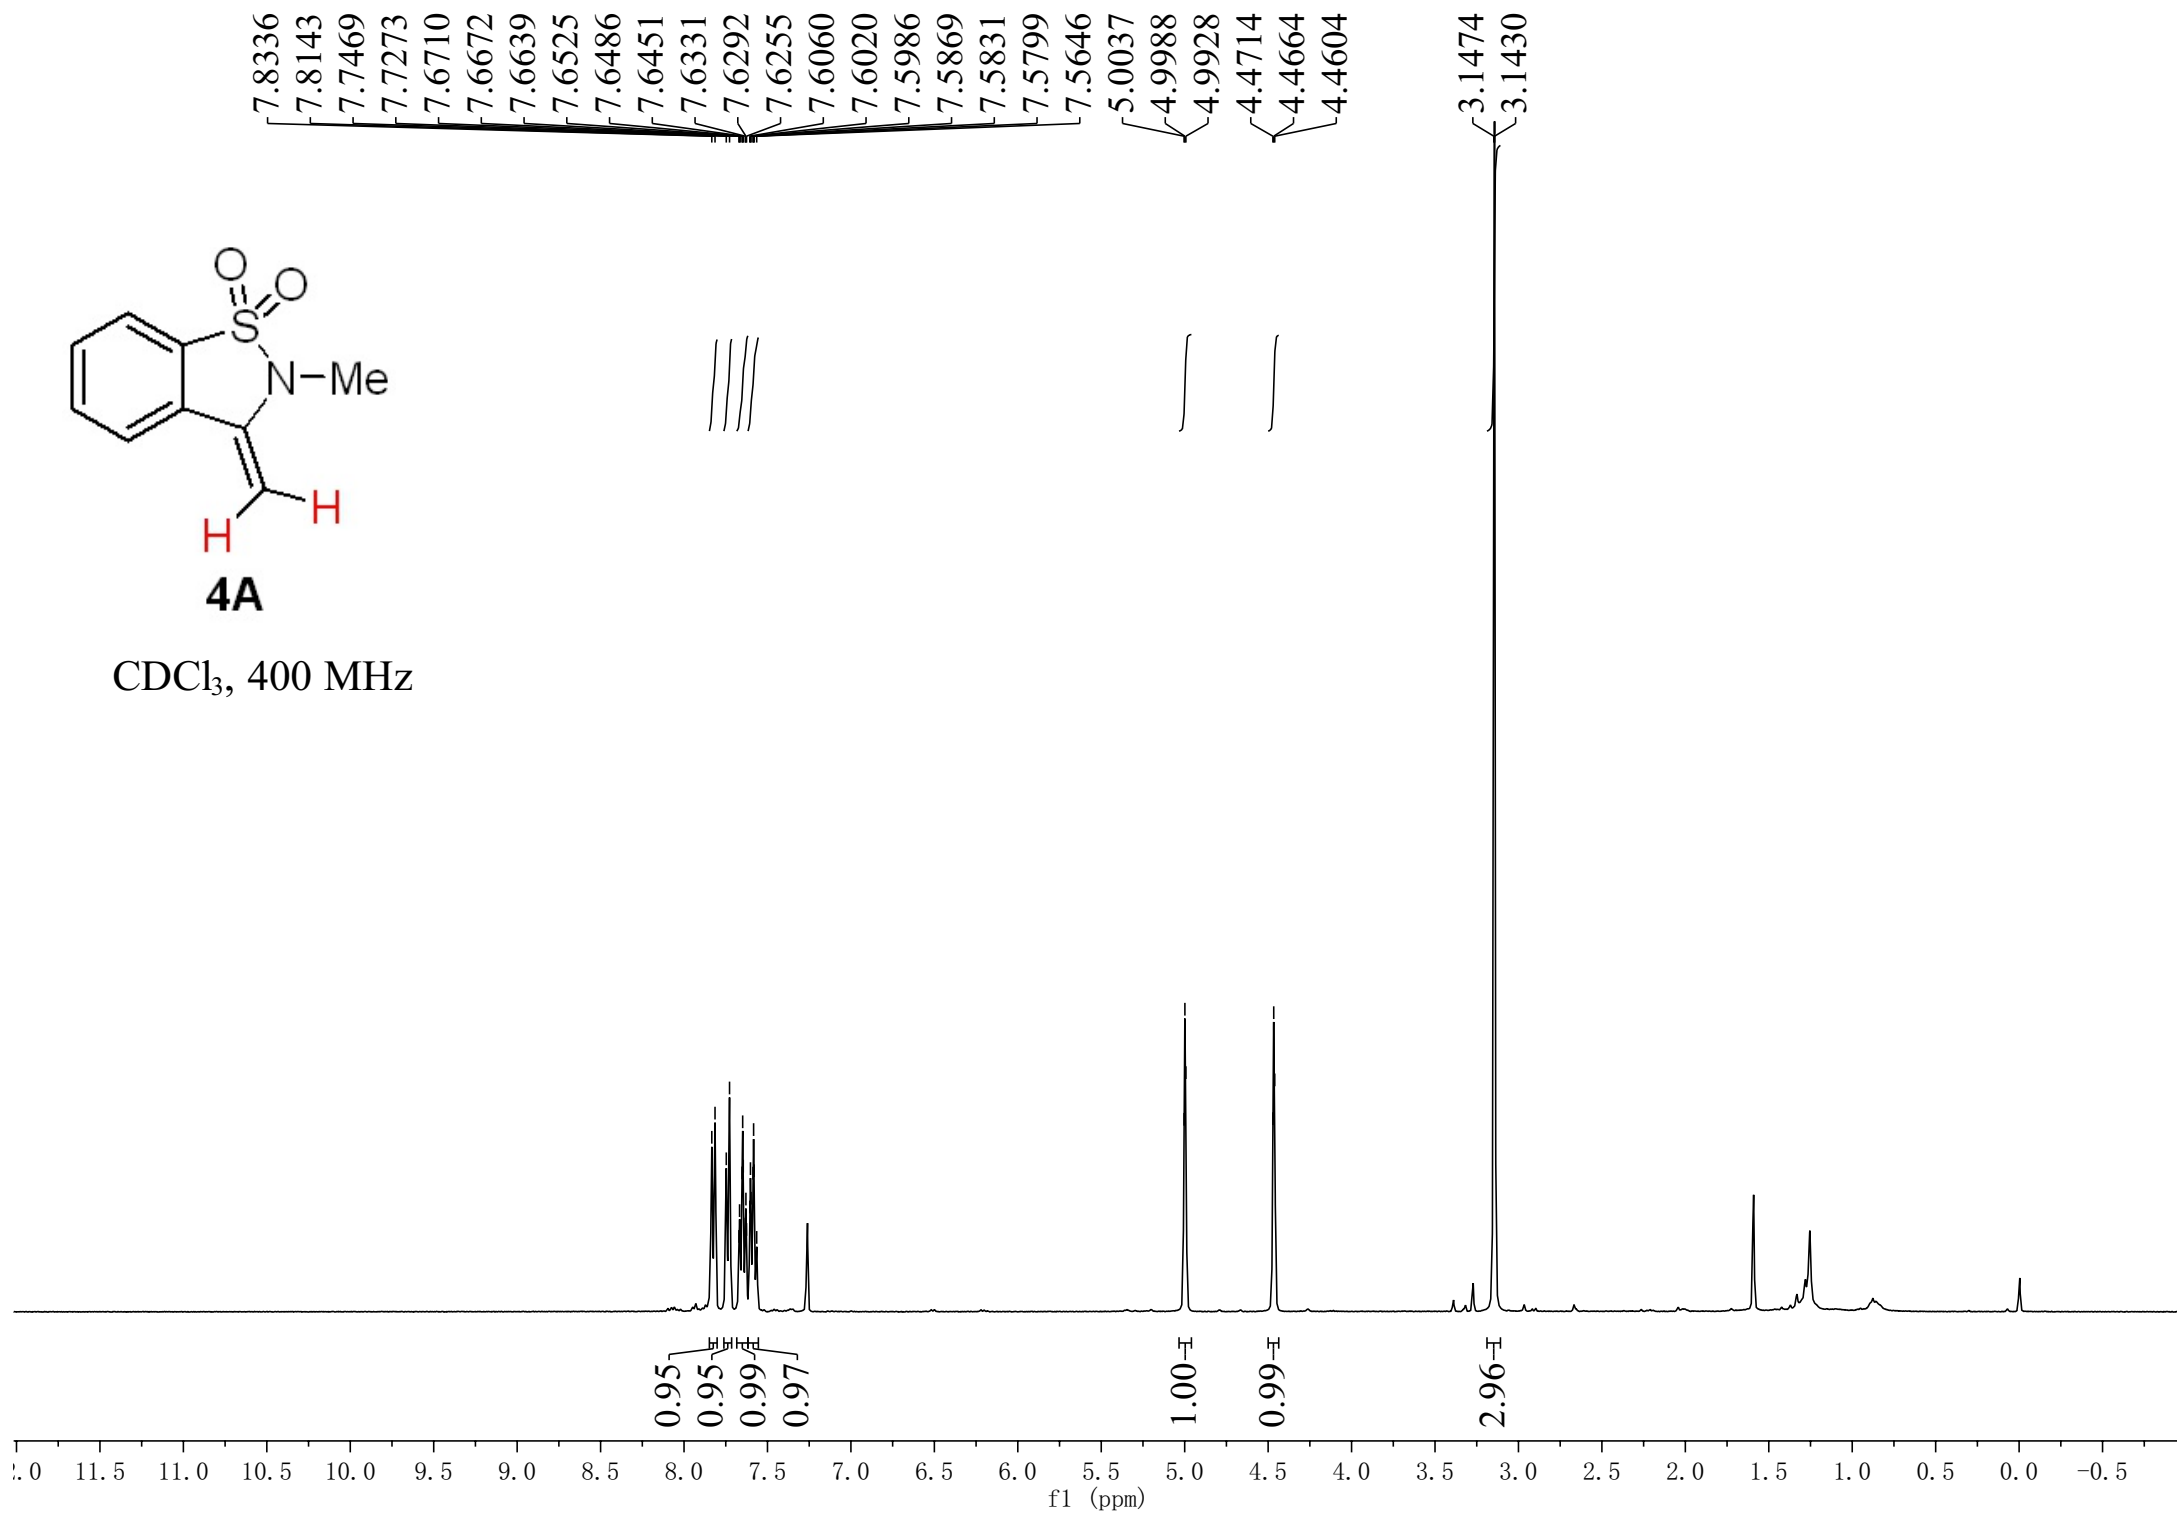

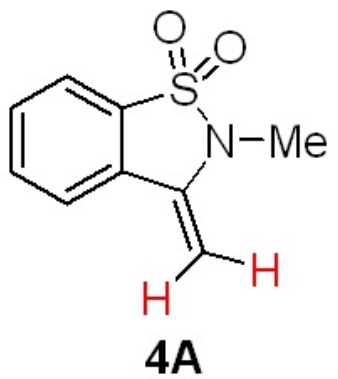

CDCl<sub>3</sub>, 101 MHz

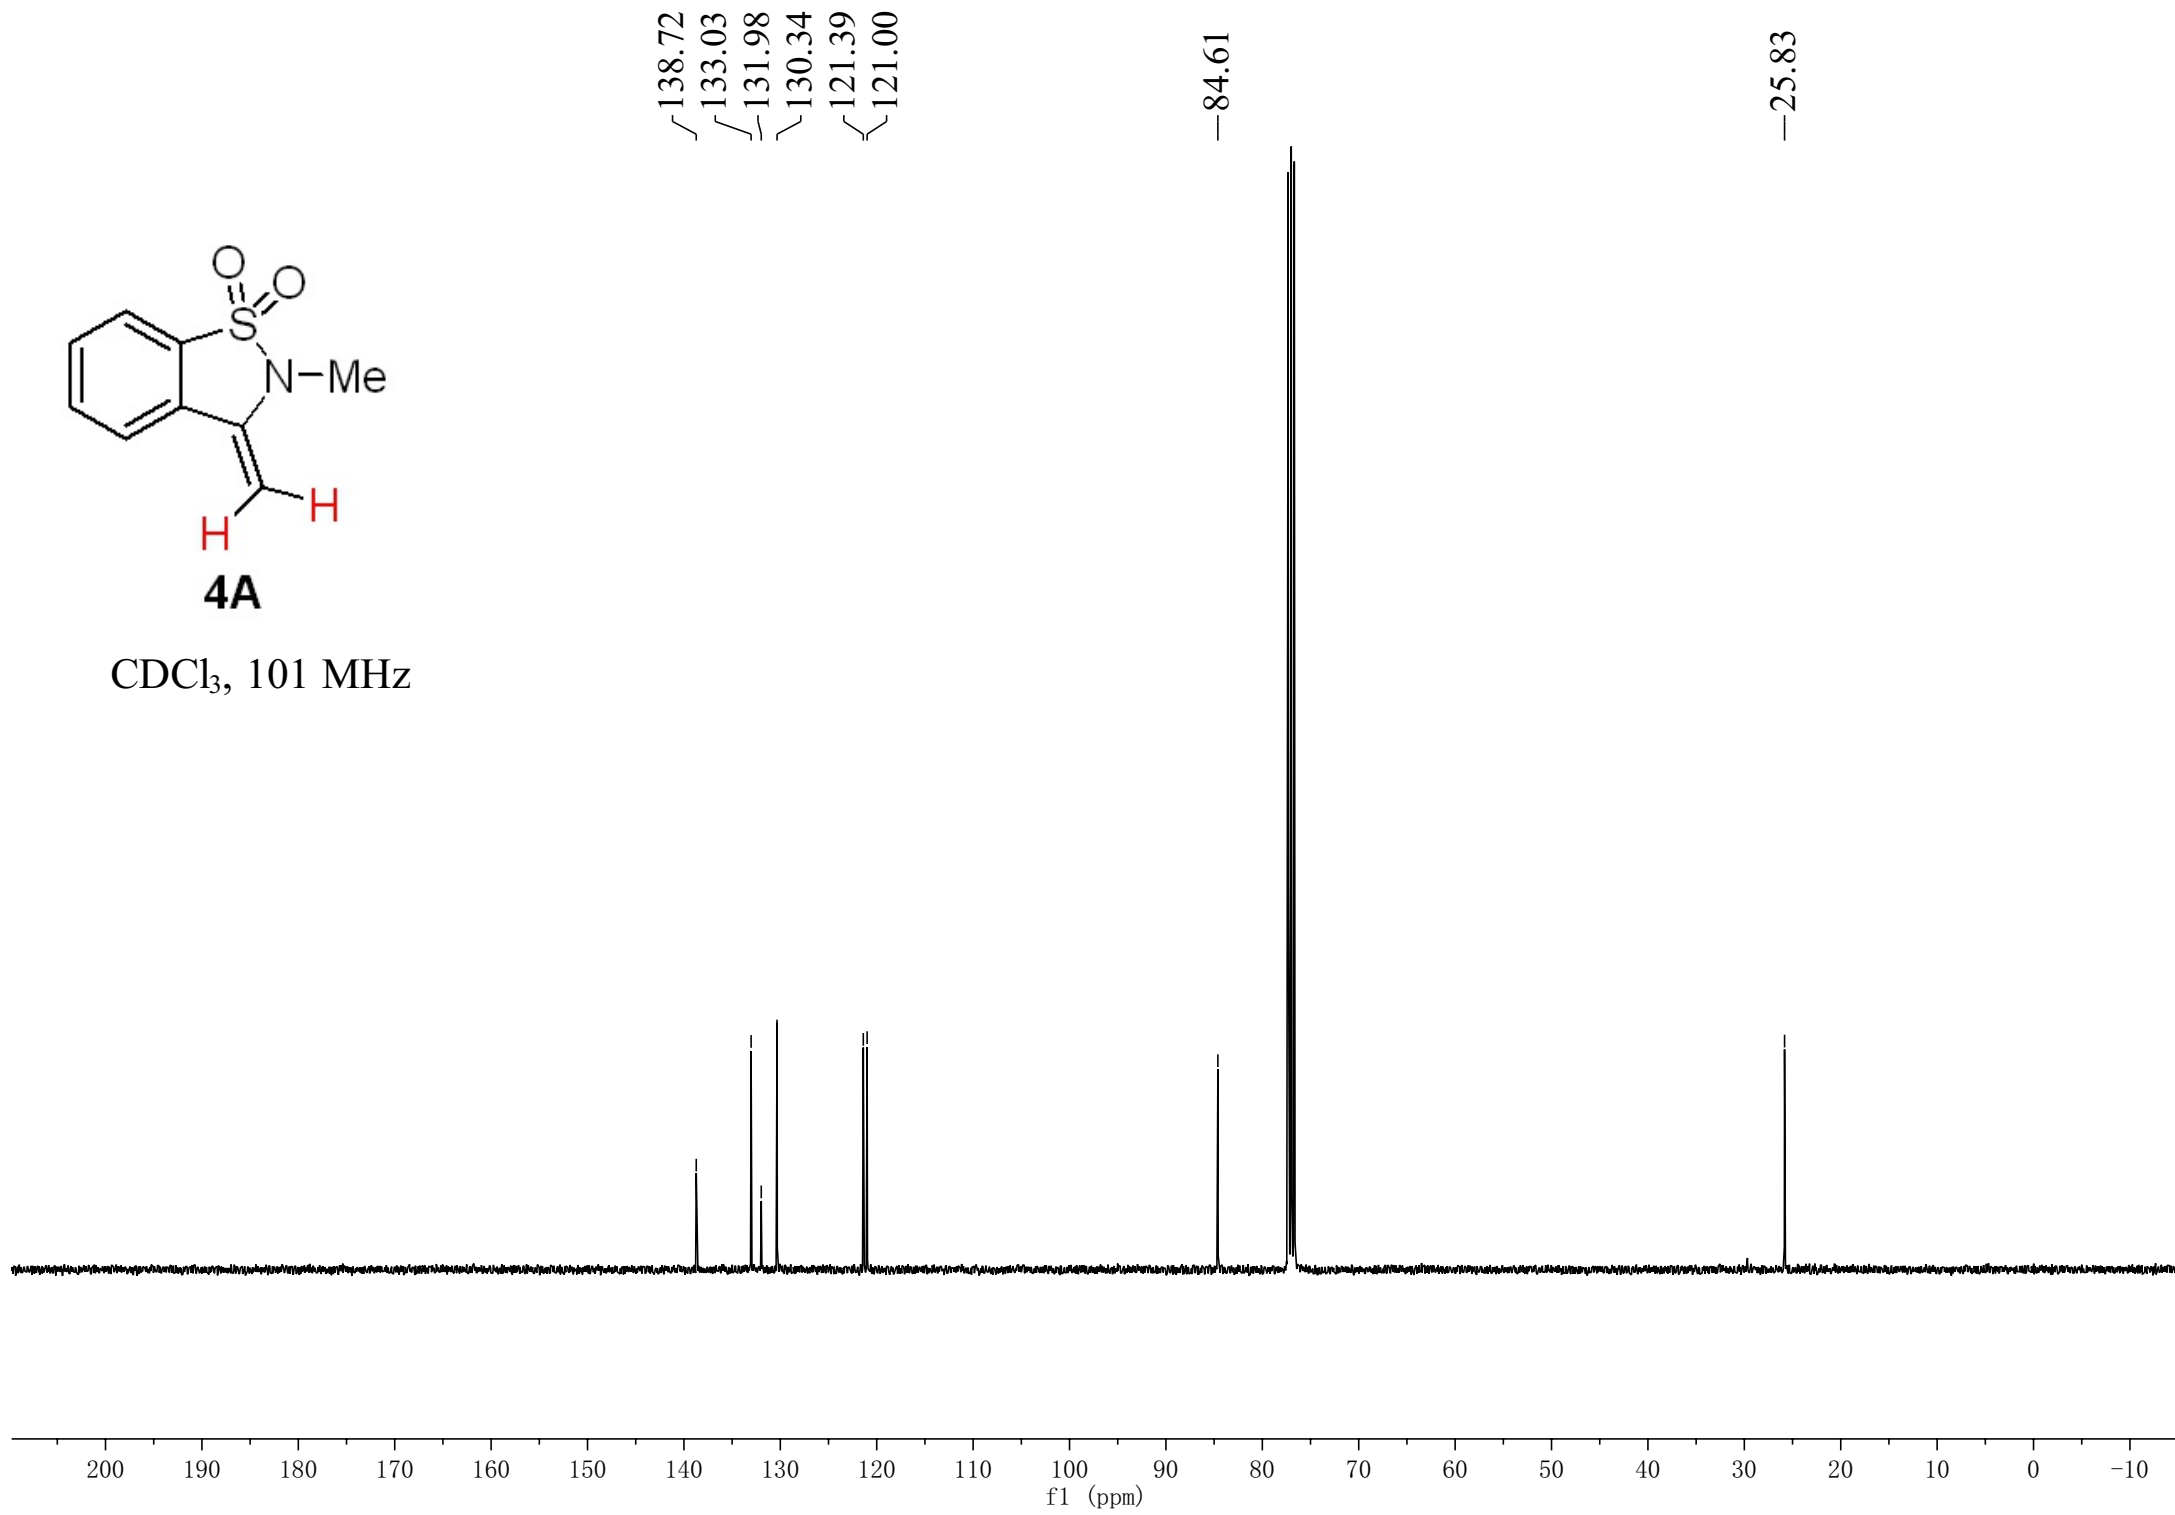

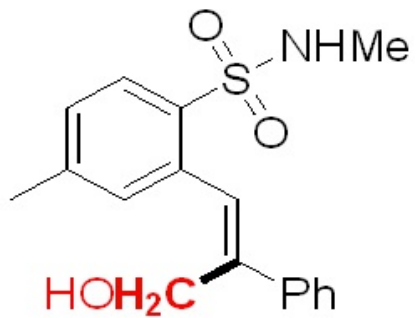

7.8495  
7.8227  
7.3643  
7.3518  
7.3390  
7.2597  
7.2233  
7.2106  
7.2037  
7.1026  
7.0902  
7.0778  
7.0711  
7.0366  
7.0095  
6.7111  
-5.5669  
-4.5504  
2.5641  
2.5469  
-2.0597

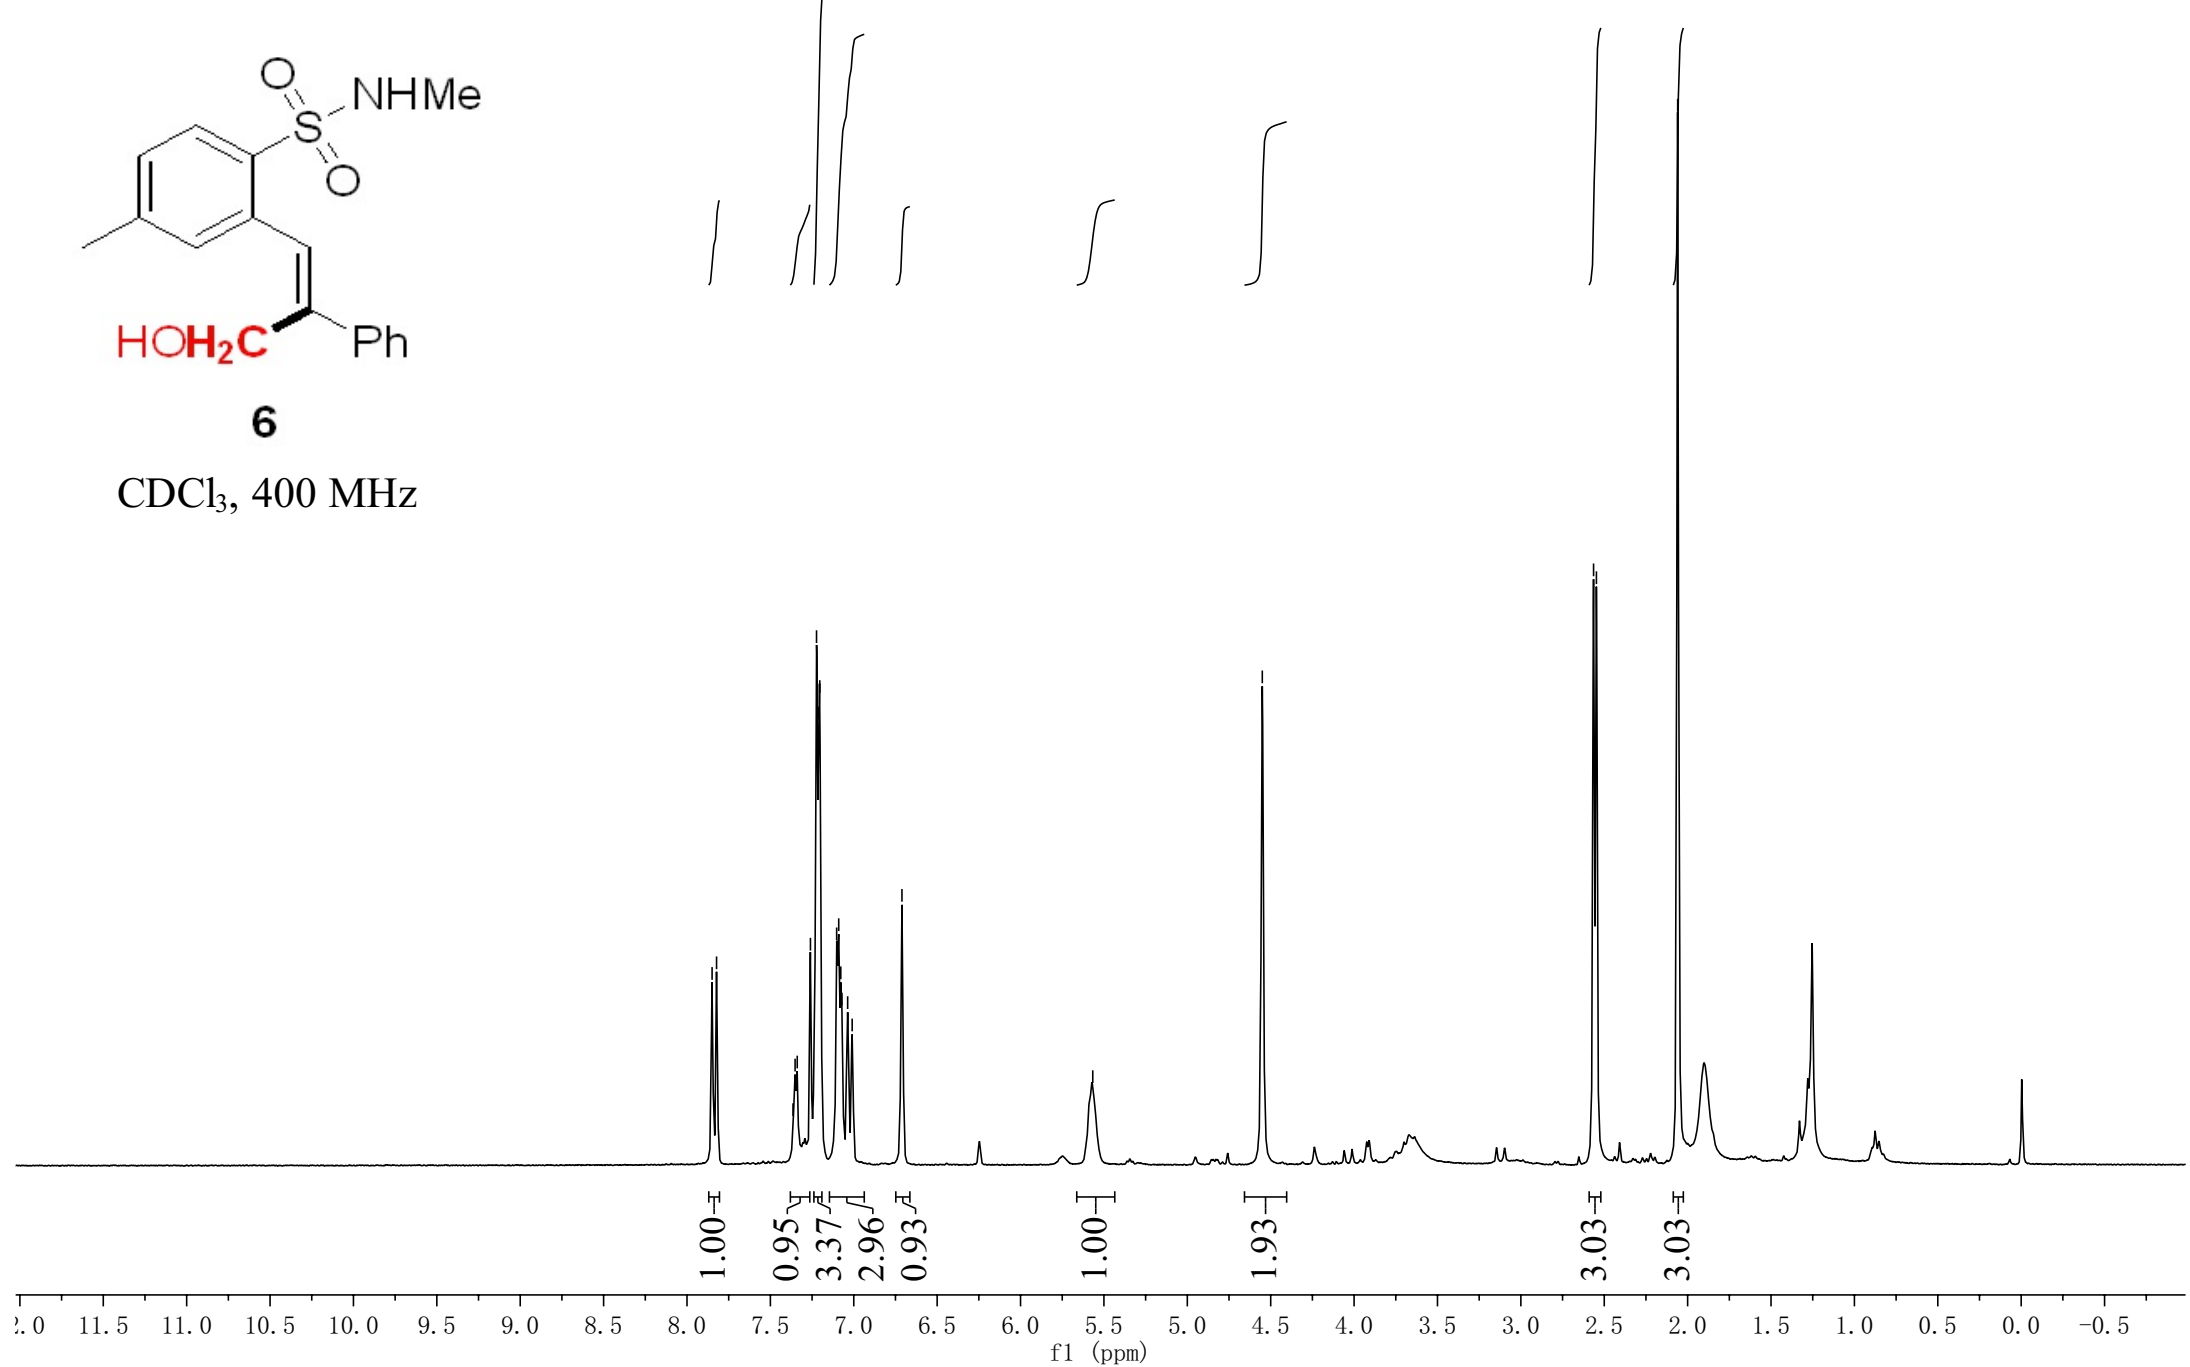



**6**

CDCl<sub>3</sub>, 101 MHz

144.40  
142.53  
137.43  
135.83  
133.61  
133.13  
129.91  
128.64  
128.42  
127.65  
127.34  
122.79

77.42  
77.00  
76.58  
-66.91

-28.88  
-21.07

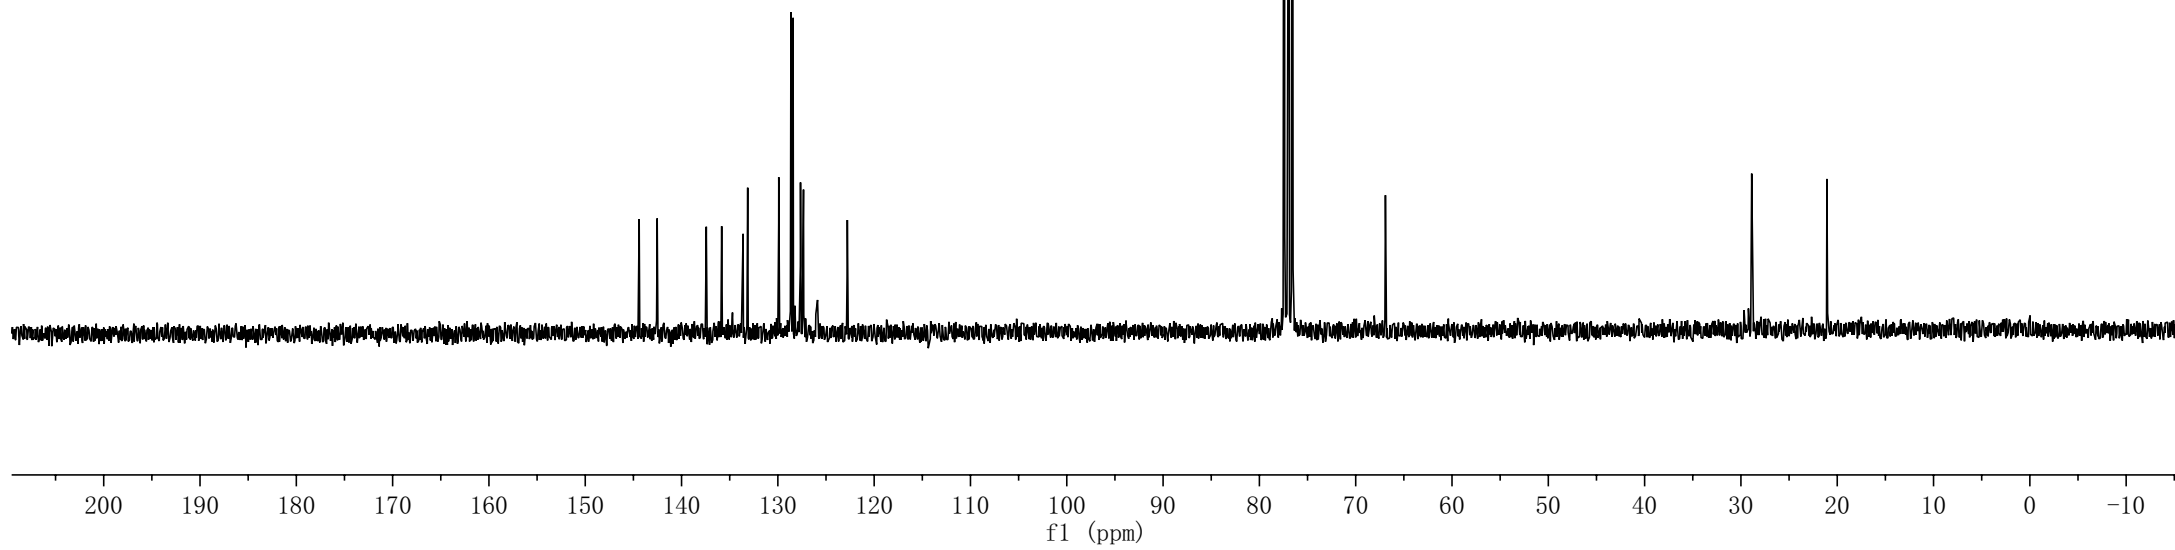

7.5787  
7.5590  
7.4158  
7.3758  
7.3594  
7.3561  
7.3495  
7.3465  
7.3414  
7.3370  
7.3308  
7.3271  
7.3223  
7.3074  
7.3004  
7.2600  
7.2058  
7.2011  
7.1969  
7.1927  
7.1866  
7.1822  
7.1769  
5.7173  
5.7132

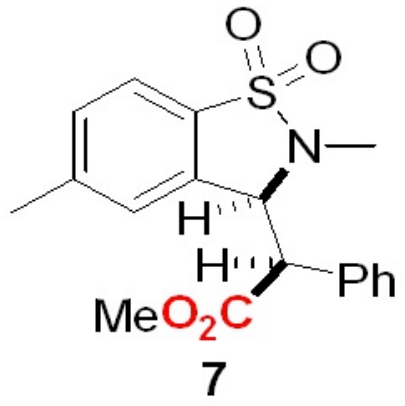

CDCl<sub>3</sub>, 400 MHz

4.8379  
4.8145  
4.7893  
4.7635  
3.9544  
3.9312  
3.9242  
3.8983  
3.7348  
3.7018  
2.9803  
2.4177  
2.3895  
2.0797

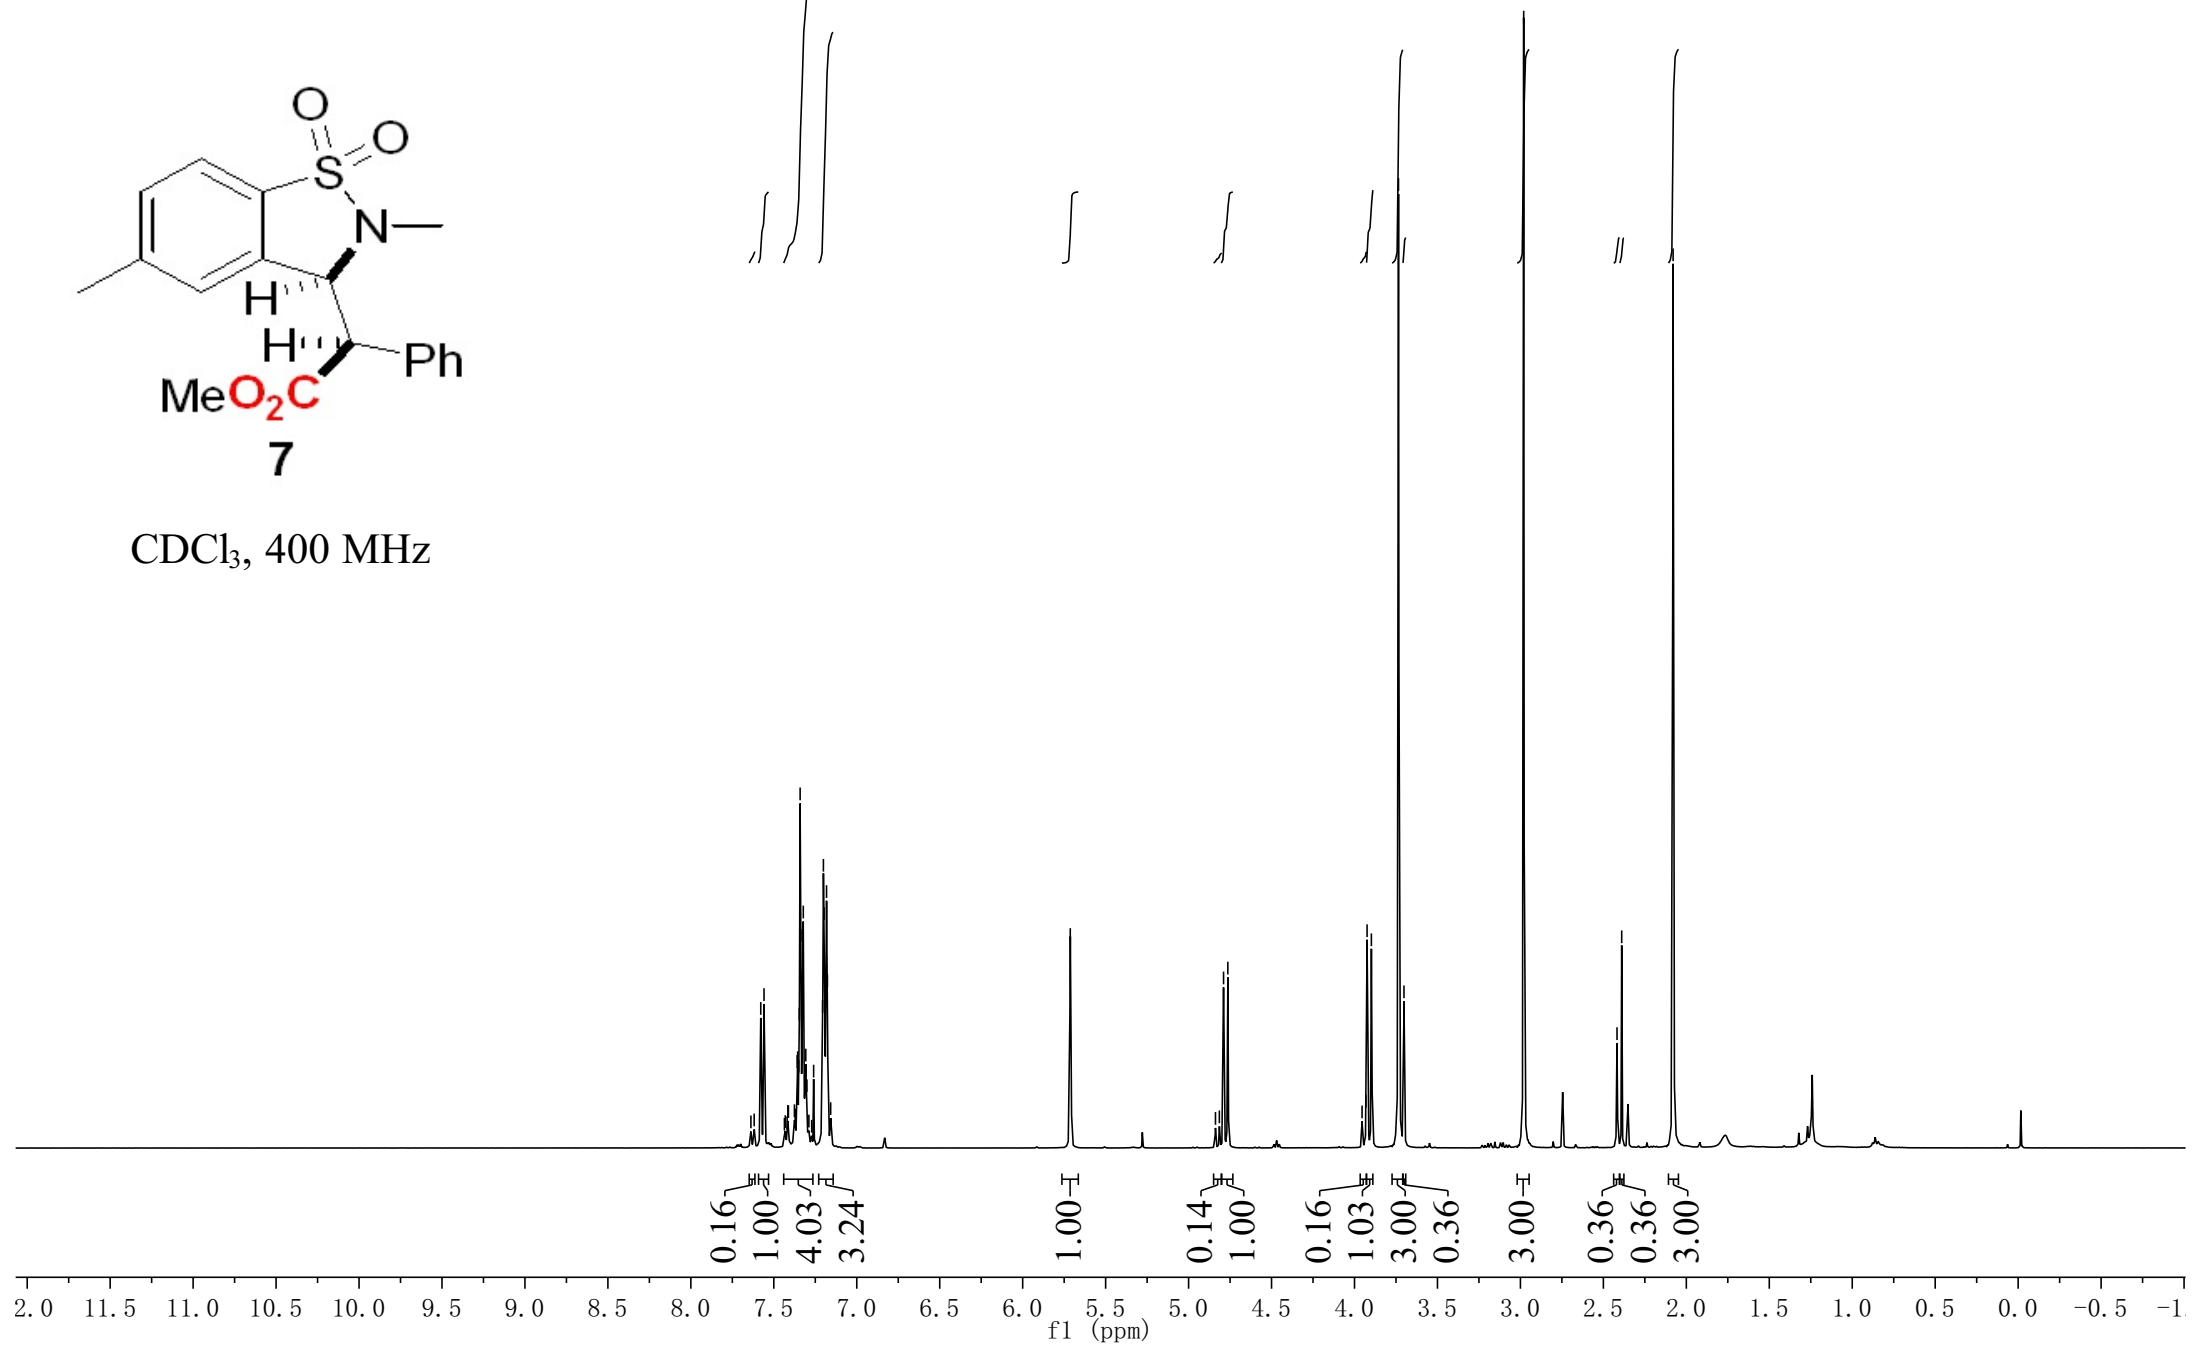

2.0 11.5 11.0 10.5 10.0 9.5 9.0 8.5 8.0 7.5 7.0 6.5 6.0 5.5 5.0 4.5 4.0 3.5 3.0 2.5 2.0 1.5 1.0 0.5 0.0 -0.5 -1

f1 (ppm)

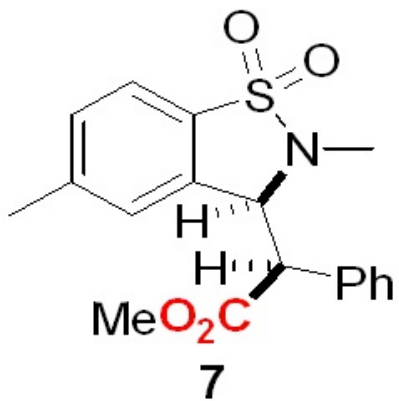

CDCl<sub>3</sub>, 101 MHz

172.49  
143.61  
142.34  
136.32  
134.80  
134.36  
133.02  
130.46  
130.17  
129.48  
128.99  
128.86  
128.75  
128.51  
128.21  
126.44  
124.97  
121.15  
120.75

77.32  
77.00  
76.68  
67.22  
66.46  
57.40  
57.10  
52.48  
52.27

36.20  
33.50

21.80  
21.37

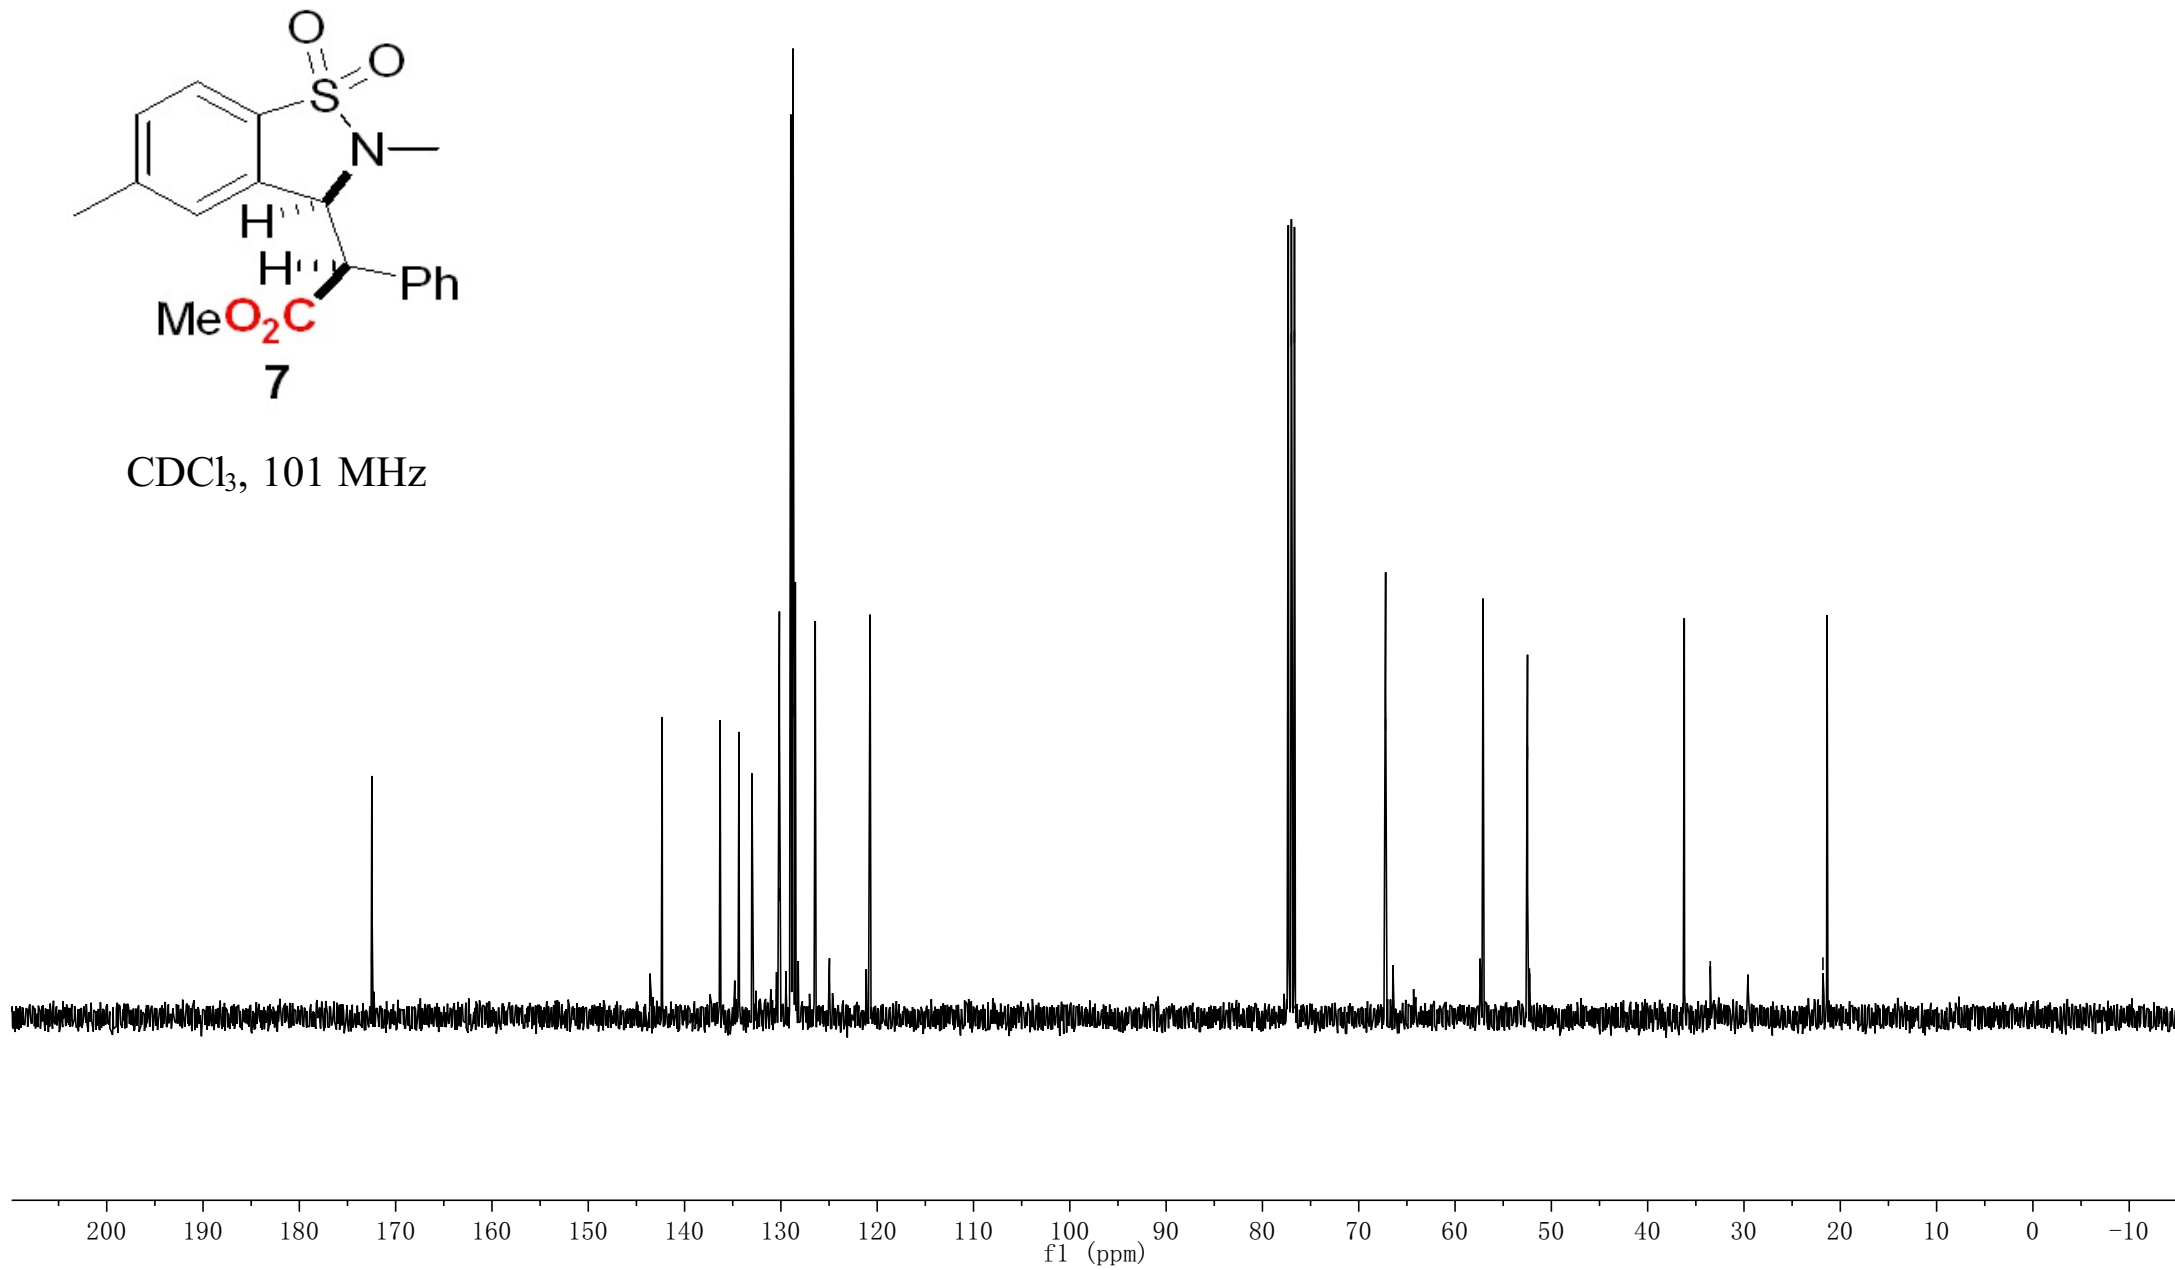

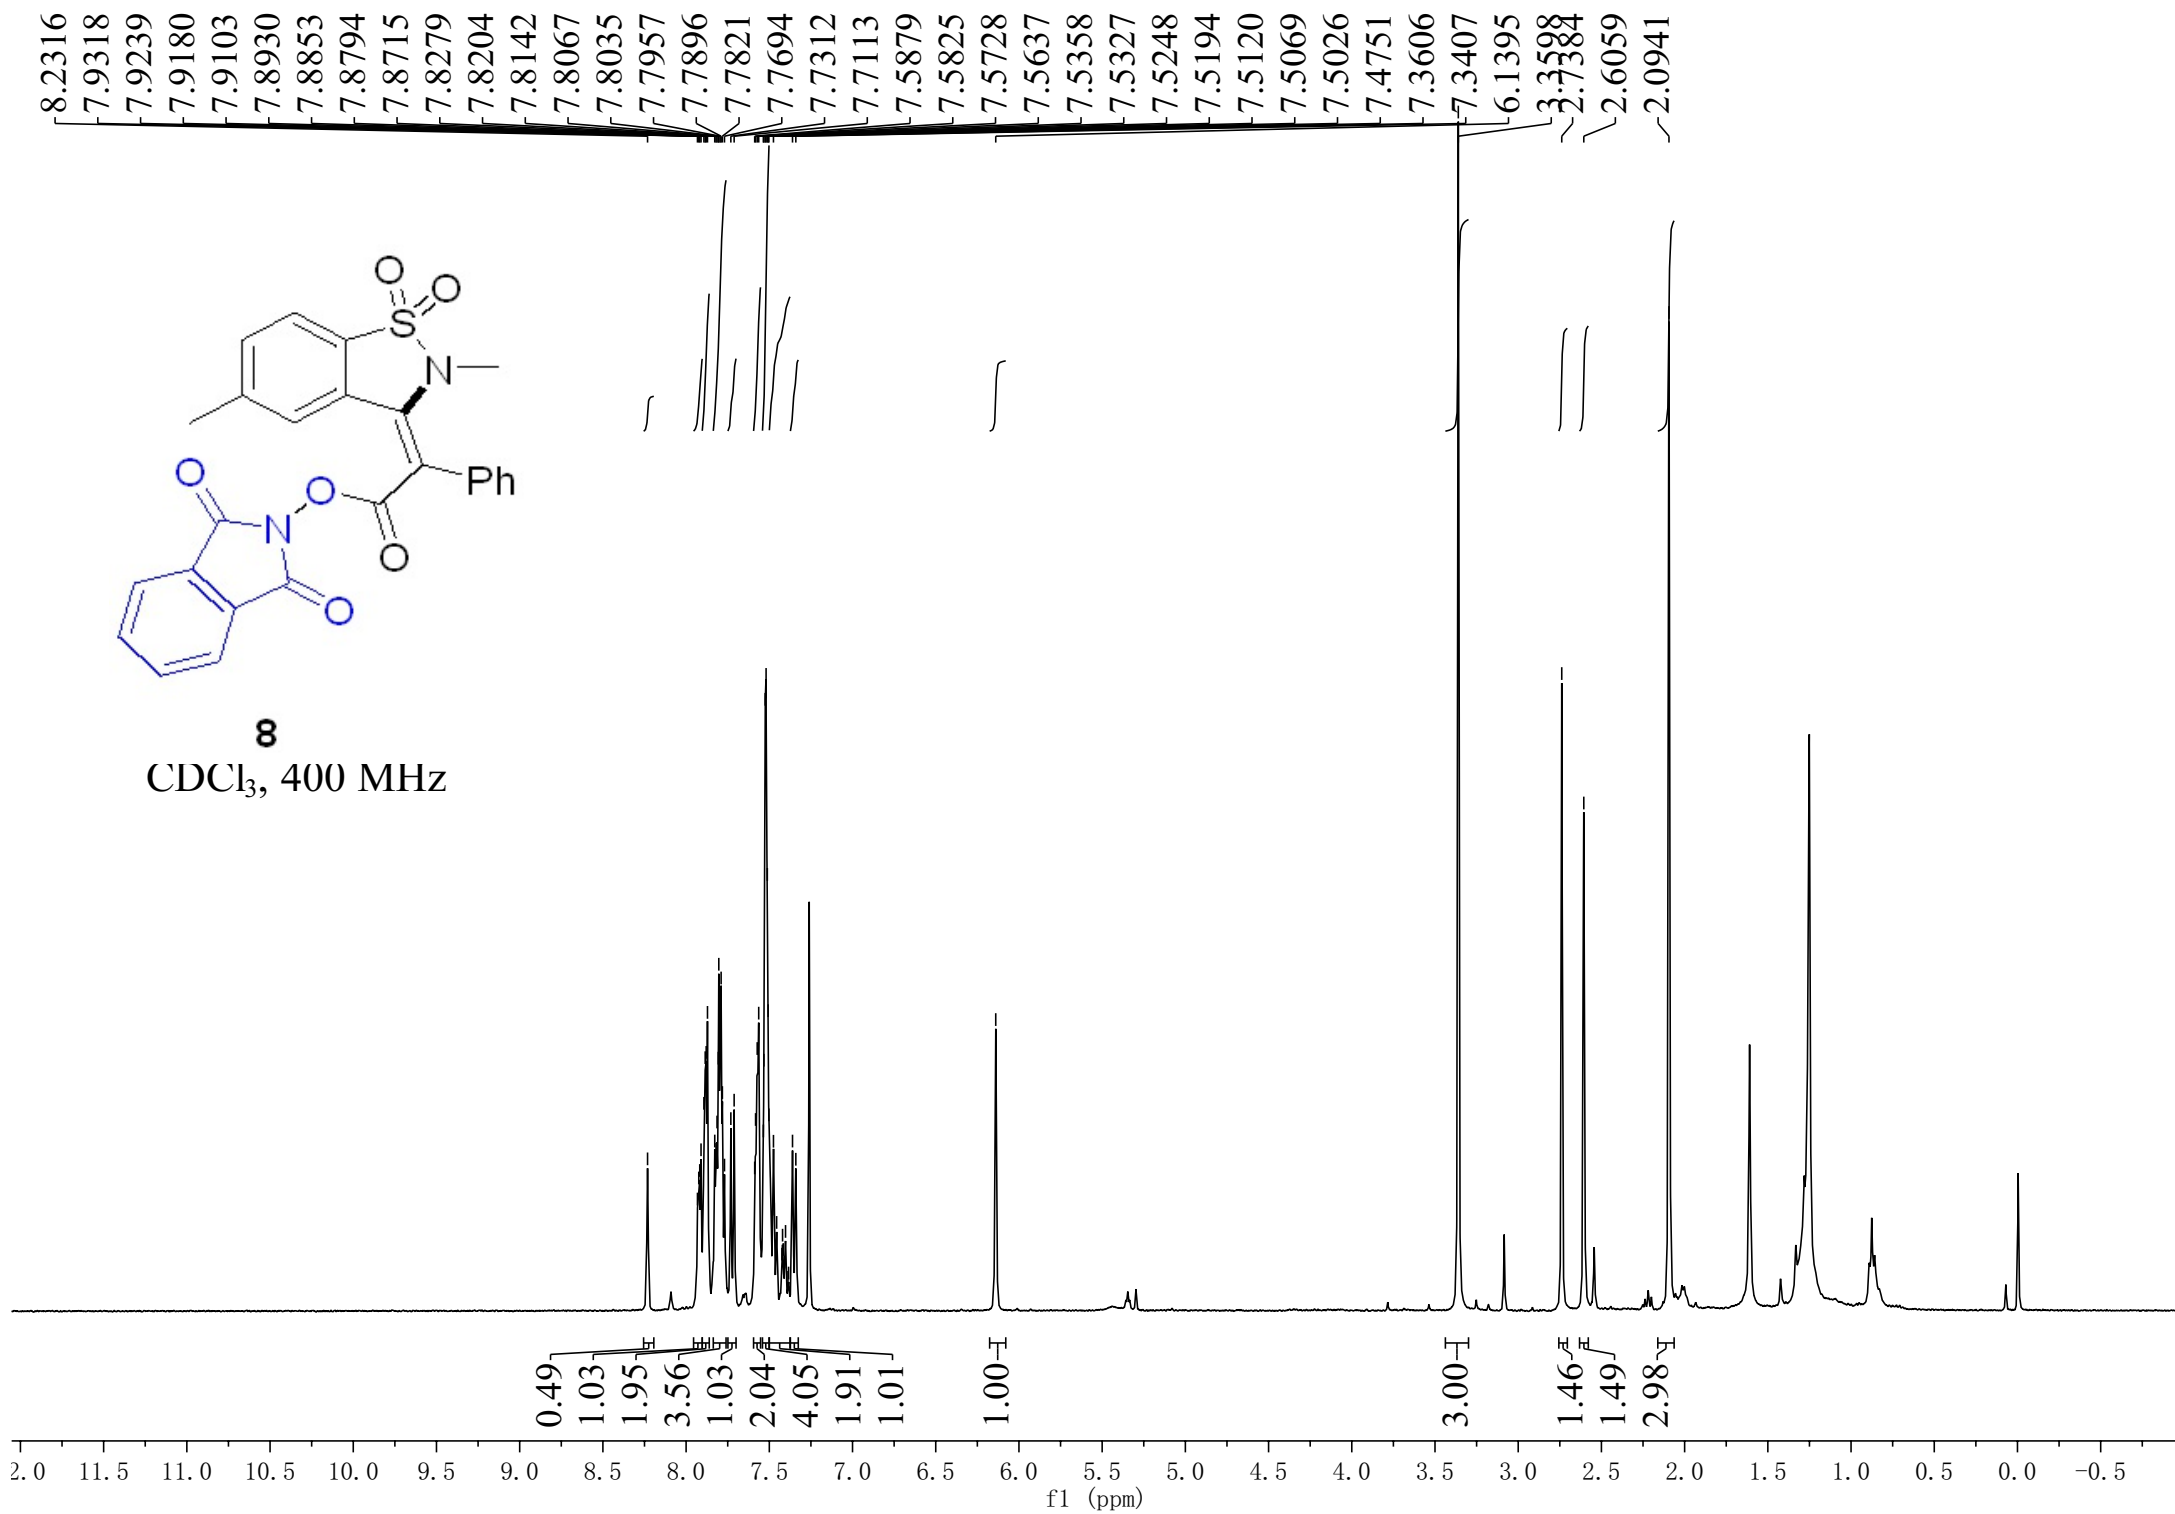



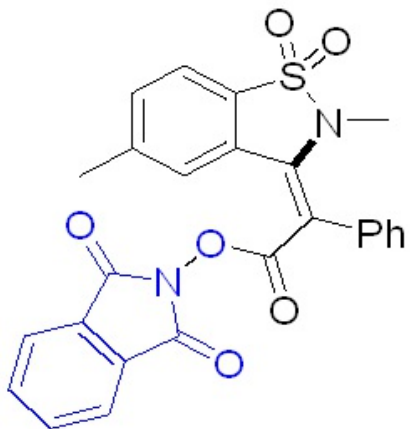

**8**  
CDCl<sub>3</sub>, 101 MHz

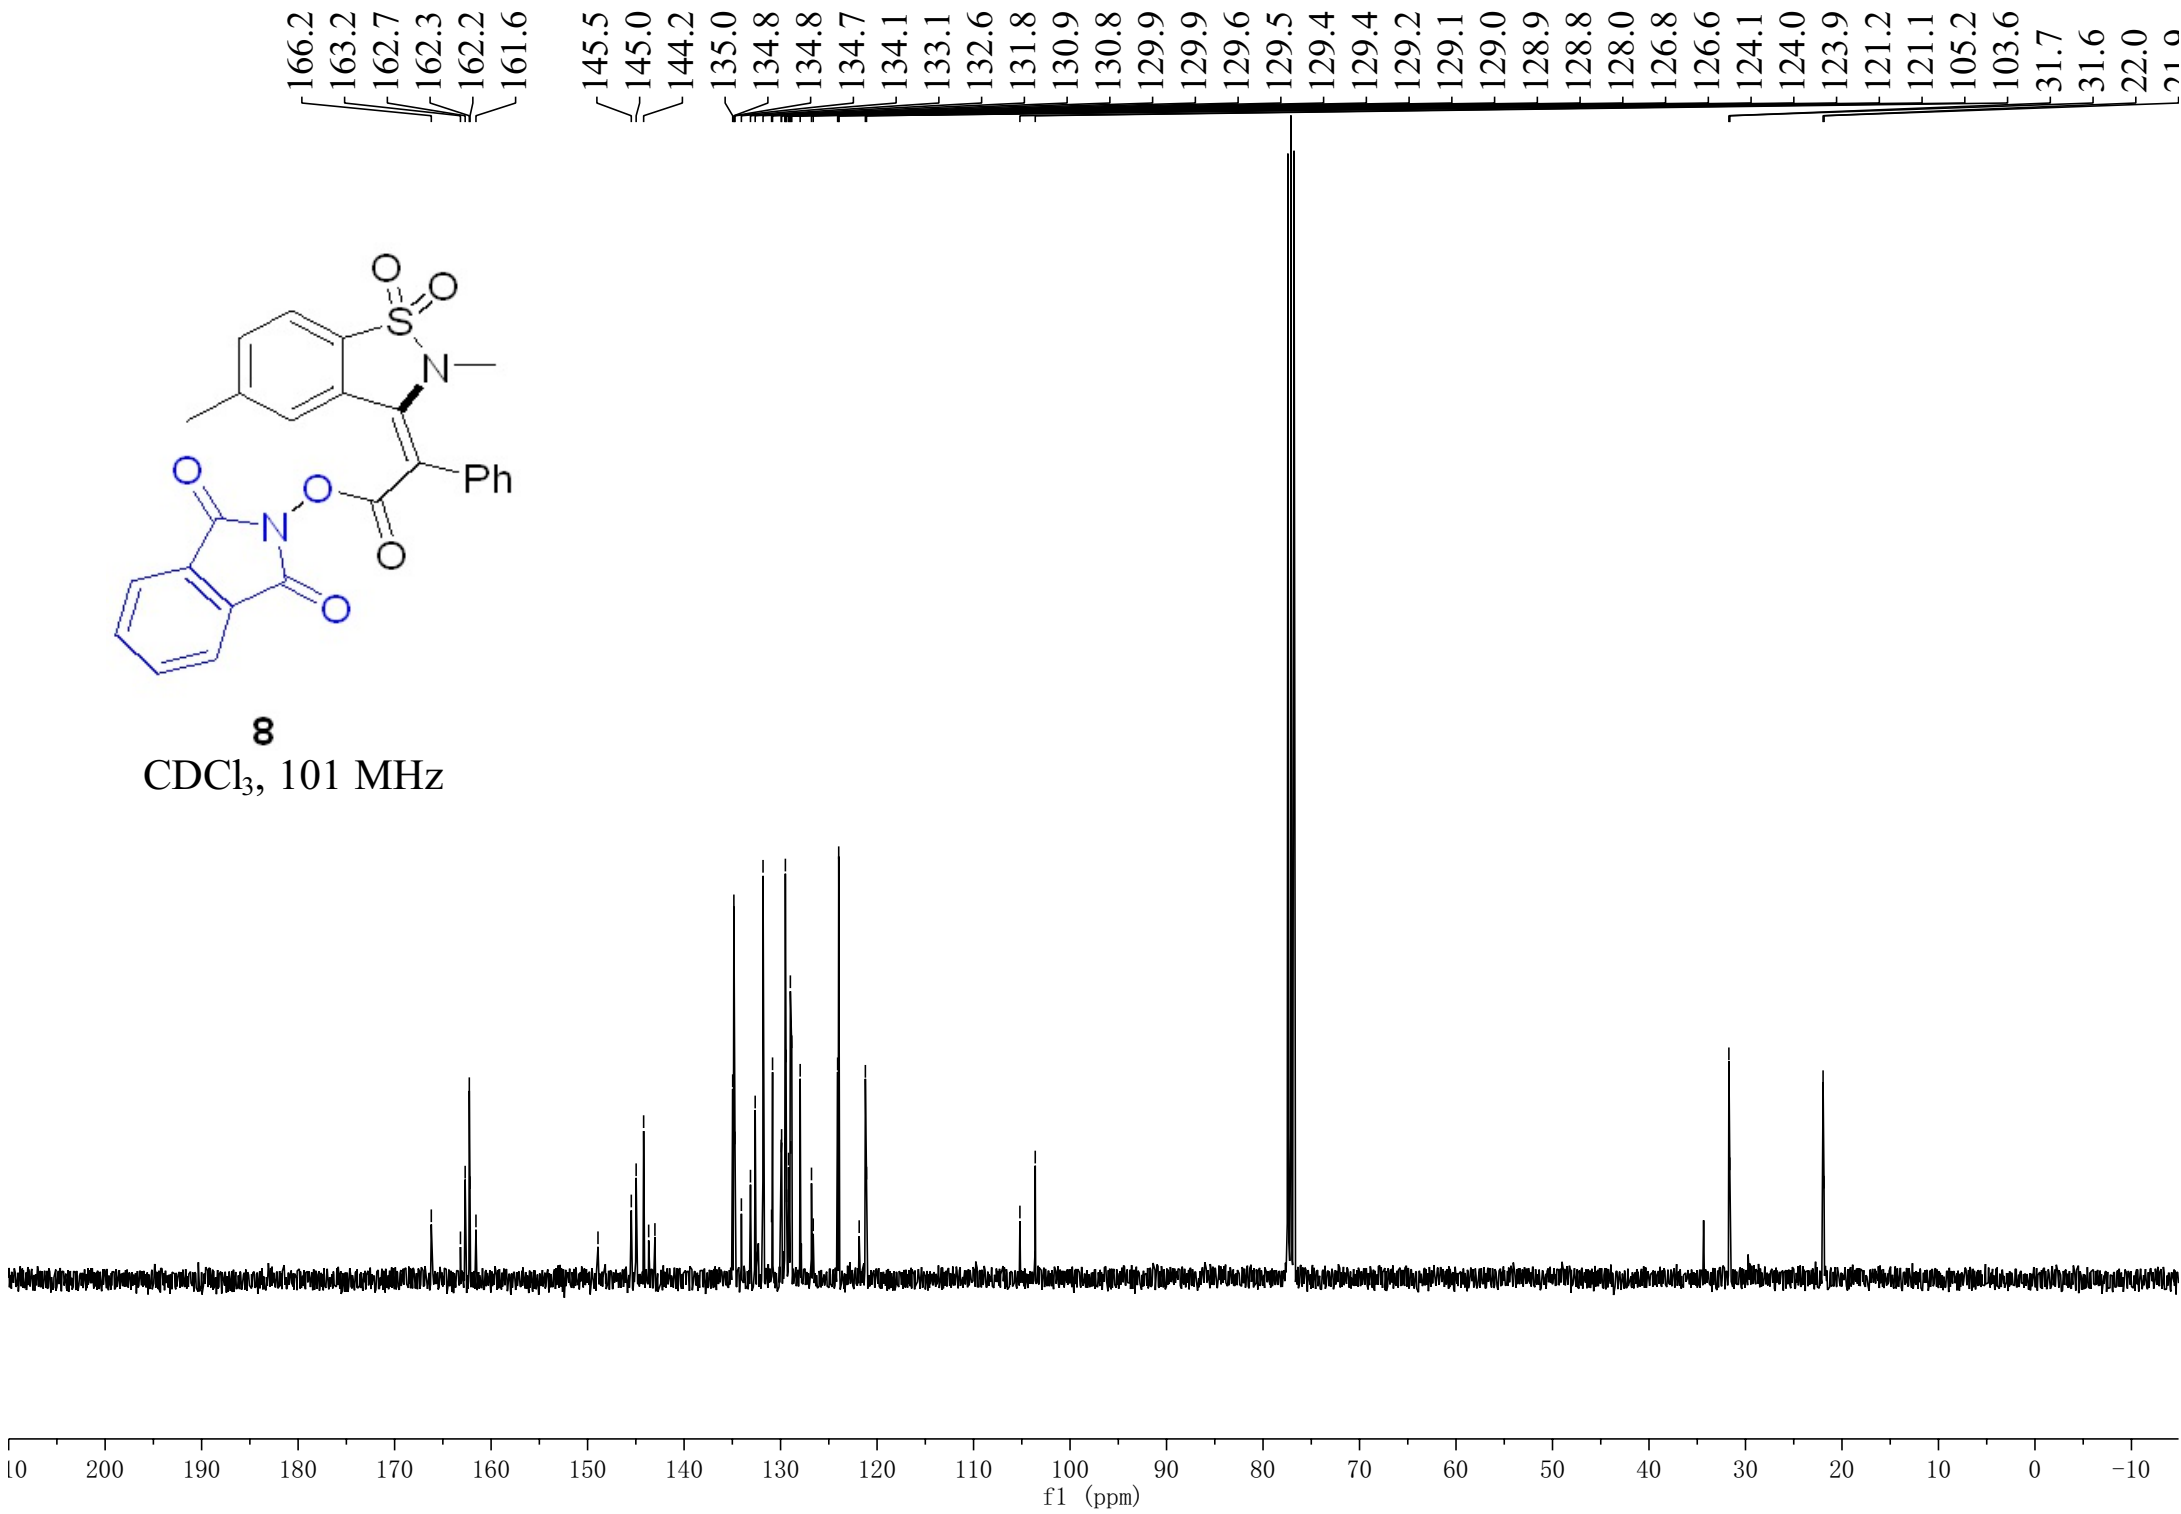

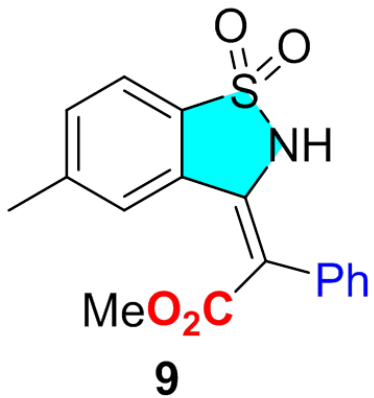

CDCl<sub>3</sub>, 400 MHz

7.9703  
7.8398  
7.8195  
7.5824  
7.5771  
7.5643  
7.5585  
7.4900  
7.4751  
7.4582  
7.3602  
7.3402  
7.2601

3.4667

2.4932

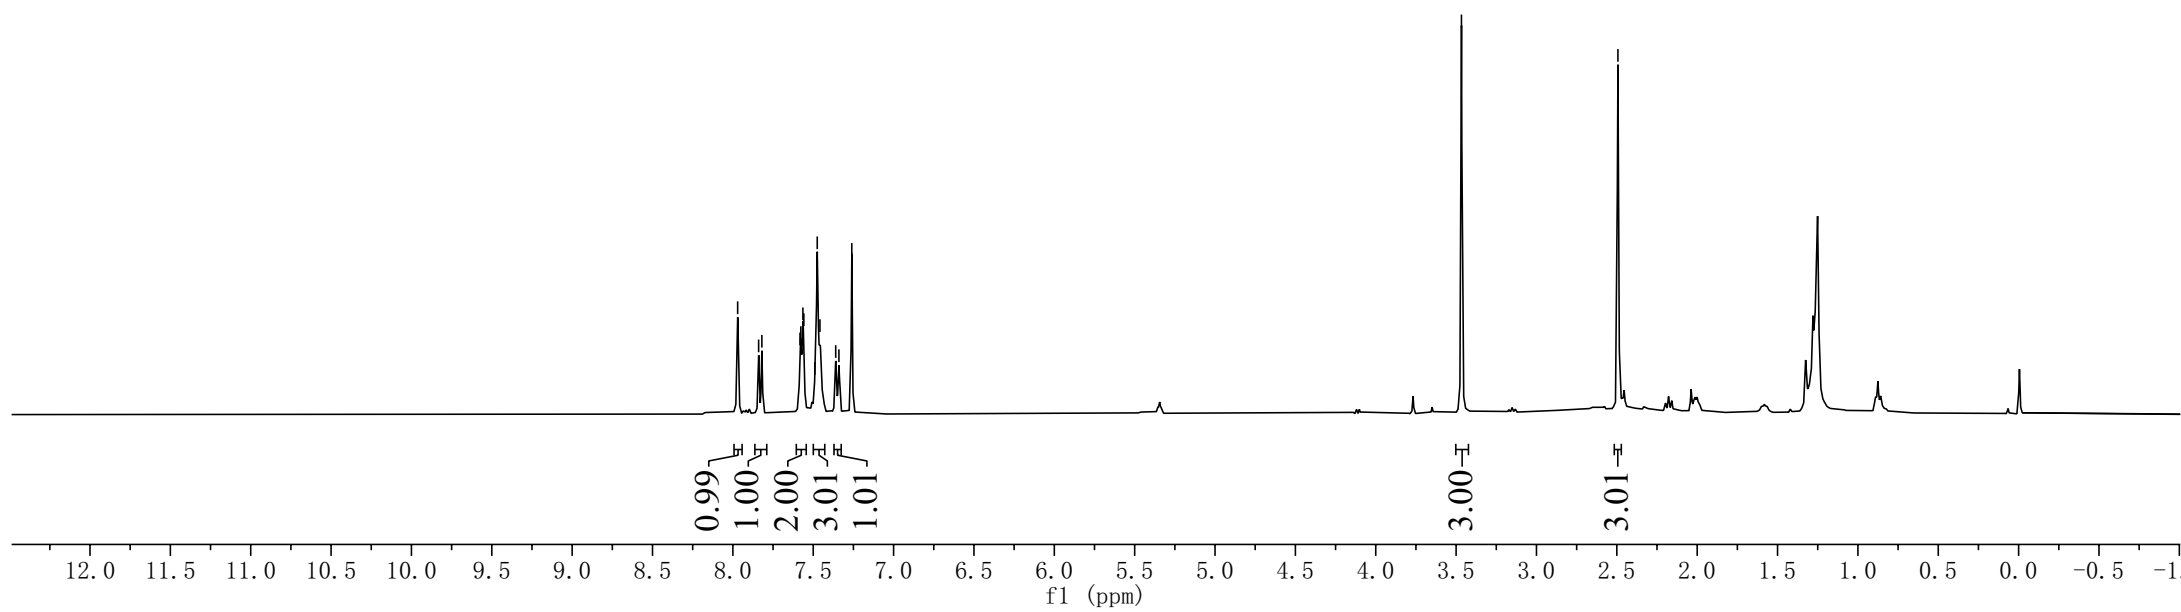

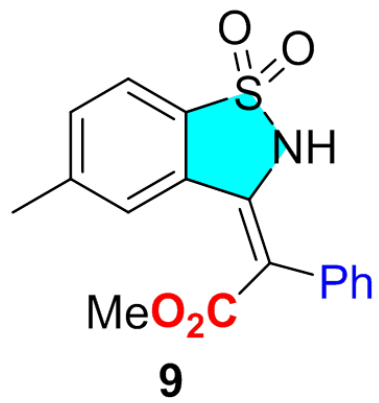

CDCl<sub>3</sub>, 101 MHz

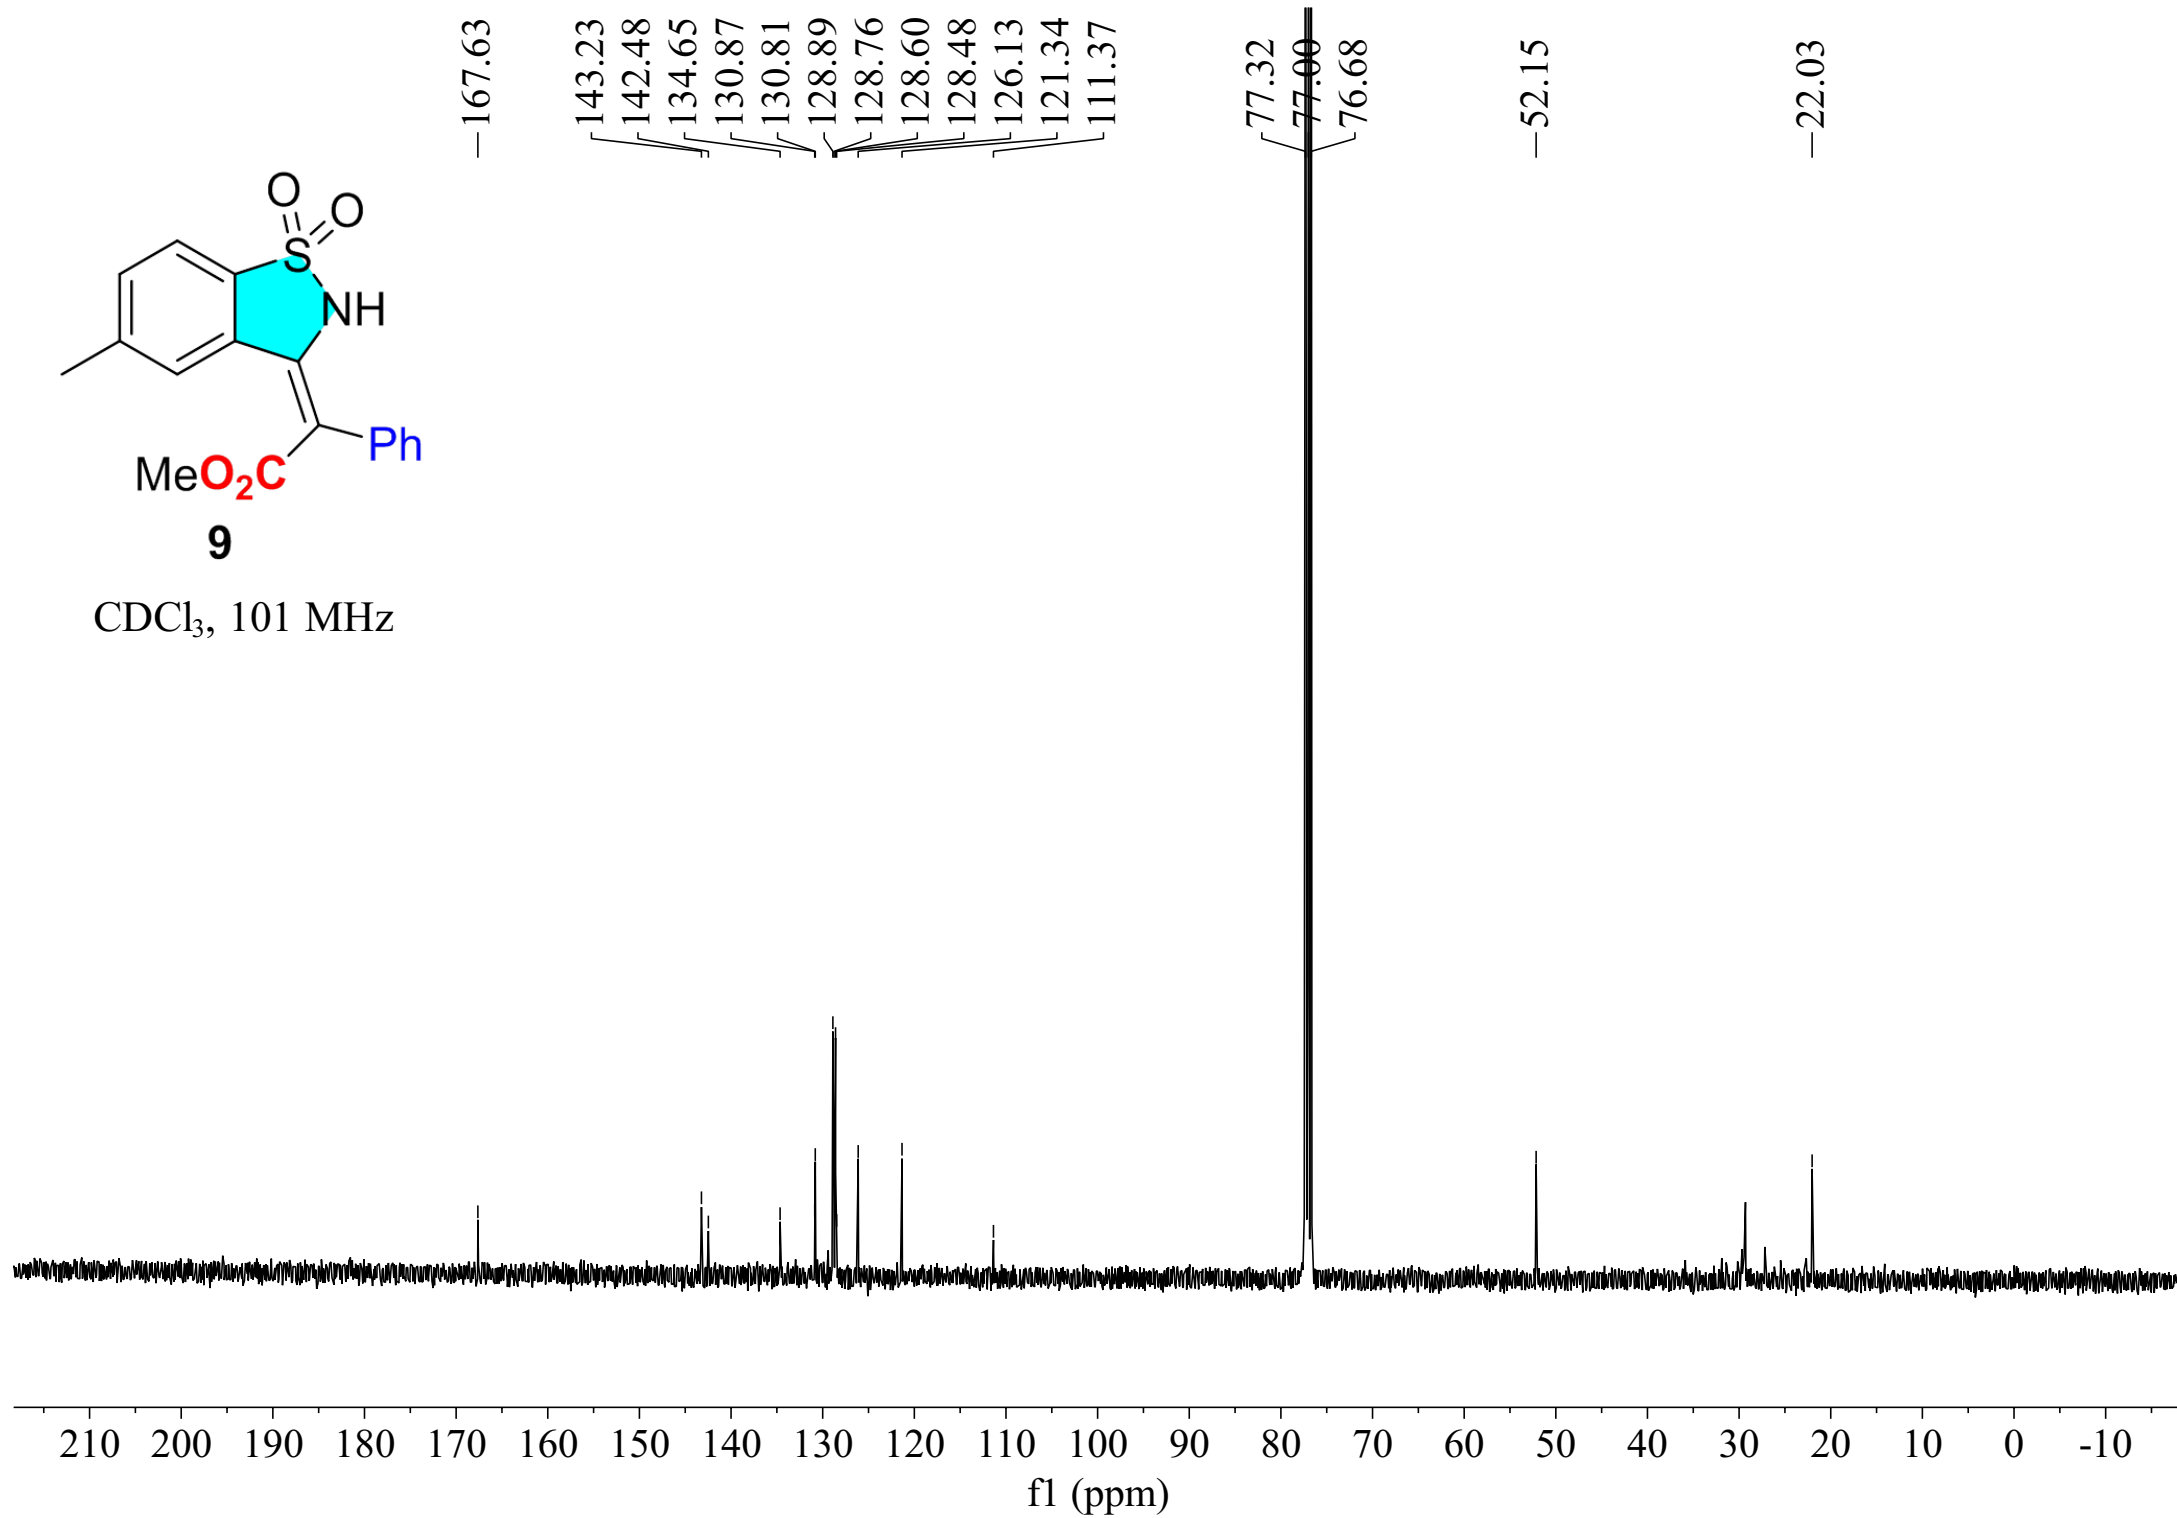

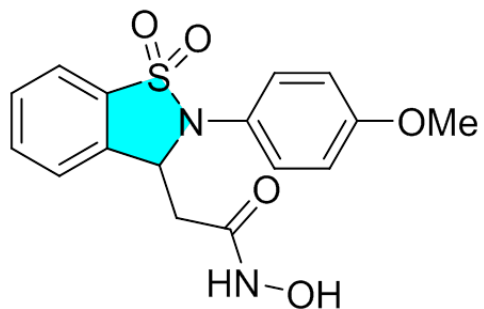

TACE inhibitor **12**

CDCl<sub>3</sub>, 400 MHz

9.1288  
7.7932  
7.7750  
7.5559  
7.5447  
7.5399  
7.5223  
7.5039  
7.4327  
7.3400  
7.3196  
7.2599  
6.9180  
6.8975

5.3571  
5.3432

3.7784

2.7097  
2.6740  
2.4774  
2.4510

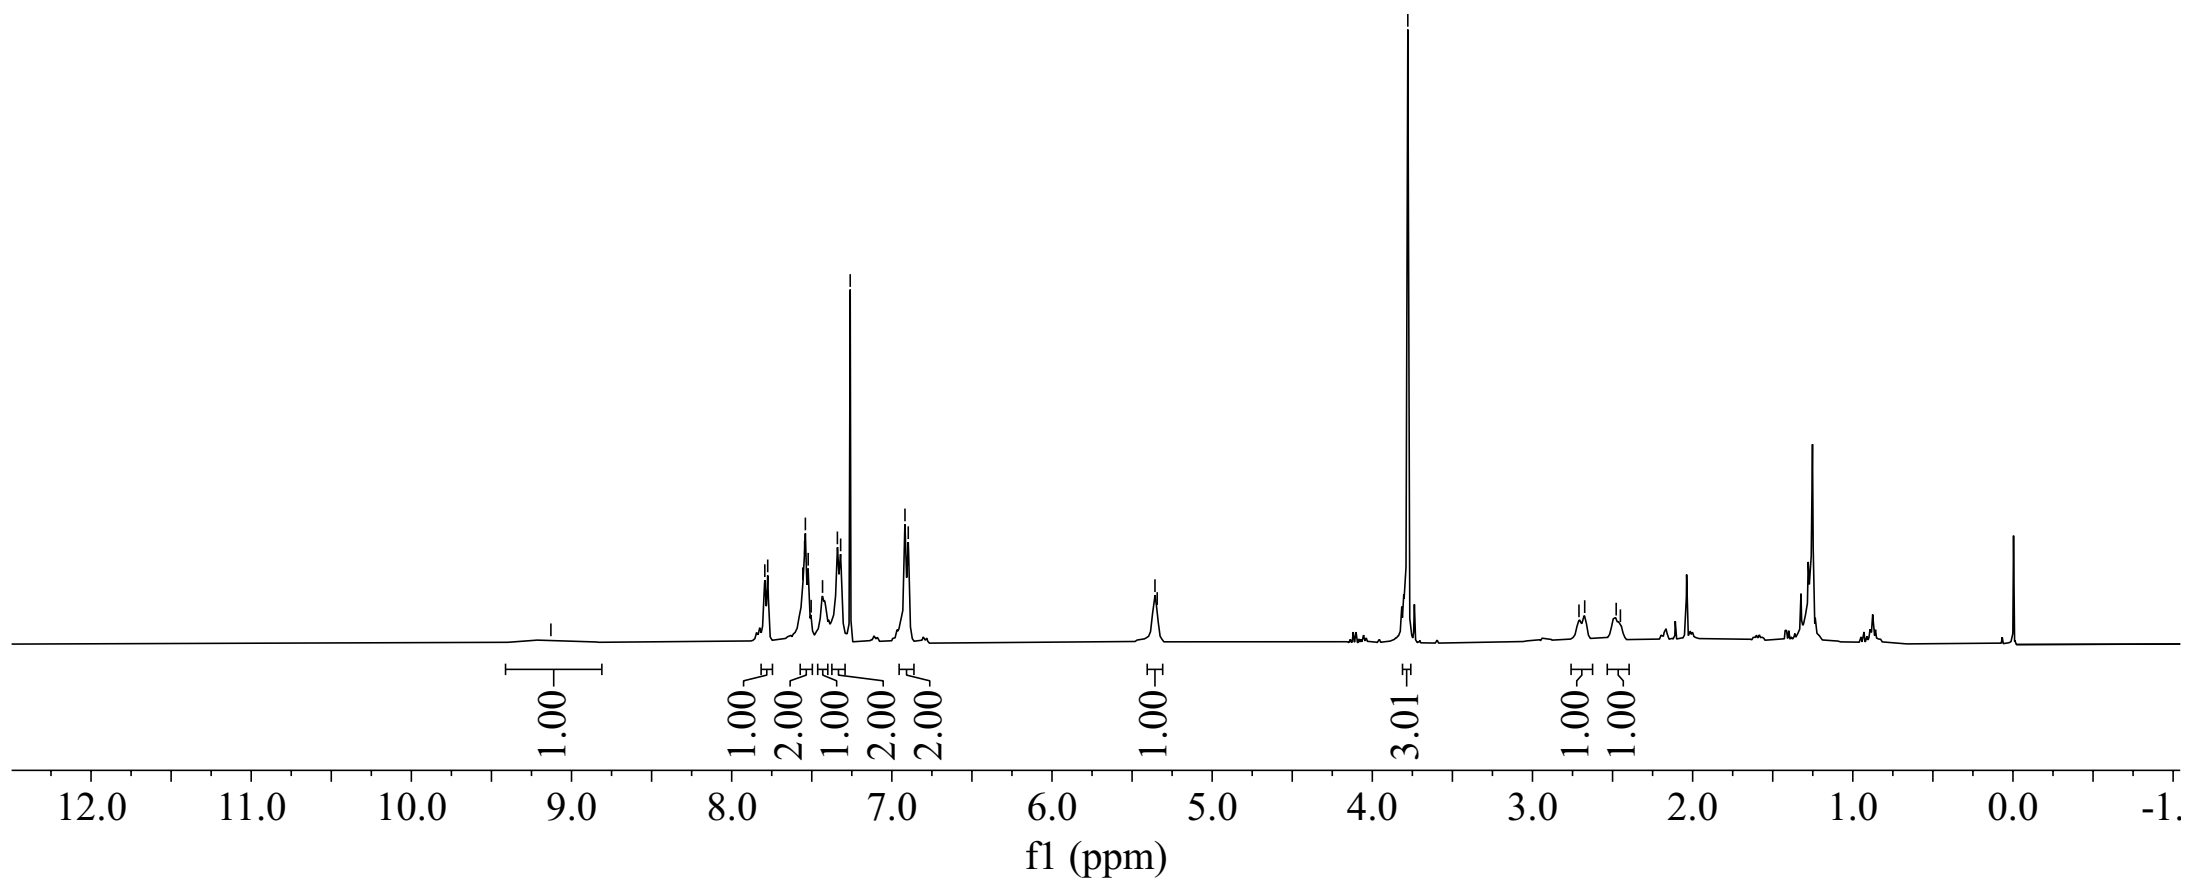

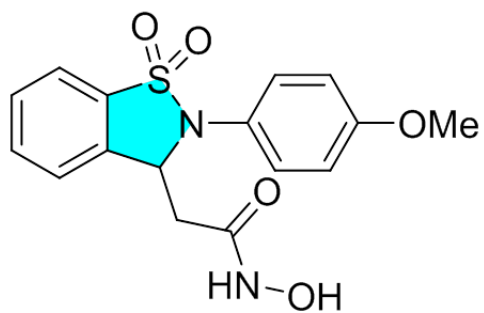

TACE inhibitor **12**

CDCl<sub>3</sub>, 101 MHz

-159.57  
-148.98  
136.06  
134.16  
133.31  
129.89  
129.10  
125.92  
124.31  
121.52  
115.17

77.32  
77.00  
76.68

~59.65  
~55.52

-37.09

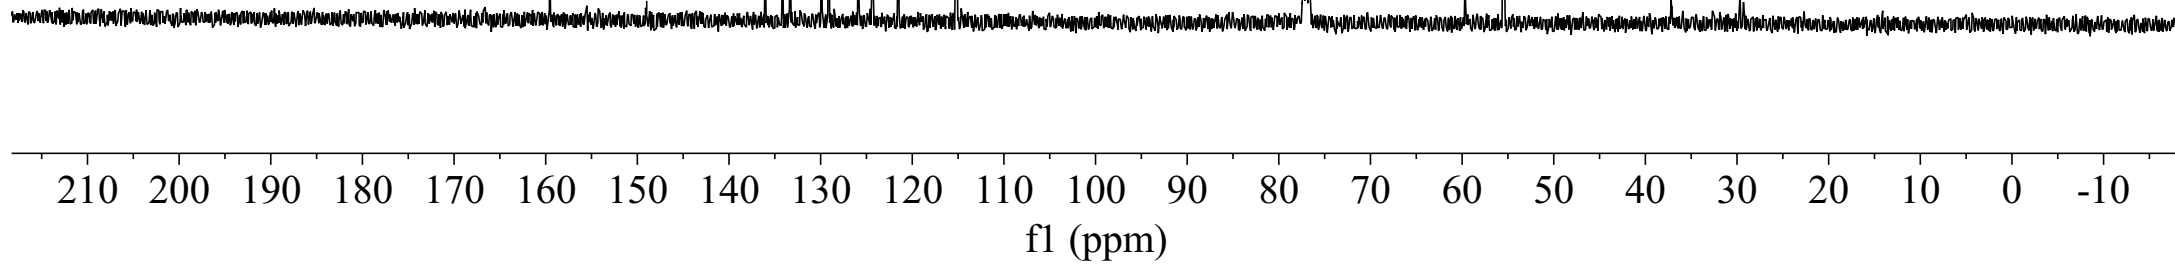

Supplement: d4cc05239k1.pdf [file d4cc05239k1.pdf]
